# Supplementary material for: Development of a ReaxFF potential for Pt–O systems describing the energetics and dynamics of Pt-oxide formation
Source: Royal Society of Chemistry journal article supplement (doi:10.1039/c4cp03111c), 2014-01-01
Supplement: c4cp03111c1.zip [file c4cp03111c1.zip]

```

XTLGRF 200
DESCRP IS
REMARK Pt111_0.25ML_8x8x7_30.0_vac hcp-displacement
FIXATOMS      1      128
CRYSTX      22.32968      22.32968      43.67409      90.00000      90.00000      60.00000
FORMAT ATOM      (a6,lx,i5,lx,a5,lx,a3,lx,a1,lx,a5,3f10.5,lx,a5,i3,i2,lx,f8.5)
HETATM      1 Pt      2.01698      17.64996      14.96615      Pt      0 0      0.00000
HETATM      2 Pt      2.01698      23.23238      14.96615      Pt      0 0      0.00000
HETATM      3 Pt      2.01698      6.48512      14.96615      Pt      0 0      0.00000
HETATM      4 Pt      2.01698      12.06754      14.96615      Pt      0 0      0.00000
HETATM      5 Pt      6.85150      20.44117      14.96615      Pt      0 0      0.00000
HETATM      6 Pt      6.85150      26.02359      14.96615      Pt      0 0      0.00000
HETATM      7 Pt      6.85150      9.27633      14.96615      Pt      0 0      0.00000
HETATM      8 Pt      6.85150      14.85875      14.96615      Pt      0 0      0.00000
HETATM      9 Pt      11.68602      23.23238      14.96615      Pt      0 0      0.00000
HETATM     10 Pt      11.68602      28.81480      14.96615      Pt      0 0      0.00000
HETATM     11 Pt      11.68602      12.06754      14.96615      Pt      0 0      0.00000
HETATM     12 Pt      11.68602      17.64996      14.96615      Pt      0 0      0.00000
HETATM     13 Pt      16.52053      26.02359      14.96615      Pt      0 0      0.00000
HETATM     14 Pt      16.52053      31.60601      14.96615      Pt      0 0      0.00000
HETATM     15 Pt      16.52053      14.85875      14.96615      Pt      0 0      0.00000
HETATM     16 Pt      16.52053      20.44117      14.96615      Pt      0 0      0.00000
HETATM     17 Pt      2.01698      20.44117      14.96615      Pt      0 0      0.00000
HETATM     18 Pt      2.01698      3.69391      14.96615      Pt      0 0      0.00000
HETATM     19 Pt      2.01698      9.27633      14.96615      Pt      0 0      0.00000
HETATM     20 Pt      2.01698      14.85875      14.96615      Pt      0 0      0.00000
HETATM     21 Pt      6.85150      23.23238      14.96615      Pt      0 0      0.00000
HETATM     22 Pt      6.85150      6.48512      14.96615      Pt      0 0      0.00000
HETATM     23 Pt      6.85150      12.06754      14.96615      Pt      0 0      0.00000
HETATM     24 Pt      6.85150      17.64996      14.96615      Pt      0 0      0.00000
HETATM     25 Pt      11.68602      26.02359      14.96615      Pt      0 0      0.00000
HETATM     26 Pt      11.68602      9.27633      14.96615      Pt      0 0      0.00000
HETATM     27 Pt      11.68602      14.85875      14.96615      Pt      0 0      0.00000
HETATM     28 Pt      11.68602      20.44117      14.96615      Pt      0 0      0.00000
HETATM     29 Pt      16.52053      28.81480      14.96615      Pt      0 0      0.00000
HETATM     30 Pt      16.52053      12.06754      14.96615      Pt      0 0      0.00000
HETATM     31 Pt      16.52053      17.64996      14.96615      Pt      0 0      0.00000
HETATM     32 Pt      16.52053      23.23238      14.96615      Pt      0 0      0.00000
HETATM     33 Pt      4.43424      19.04557      14.96615      Pt      0 0      0.00000
HETATM     34 Pt      4.43424      24.62799      14.96615      Pt      0 0      0.00000
HETATM     35 Pt      4.43424      7.88073      14.96615      Pt      0 0      0.00000
HETATM     36 Pt      4.43424      13.46315      14.96615      Pt      0 0      0.00000
HETATM     37 Pt      9.26876      21.83678      14.96615      Pt      0 0      0.00000
HETATM     38 Pt      9.26876      27.41920      14.96615      Pt      0 0      0.00000
HETATM     39 Pt      9.26876      10.67194      14.96615      Pt      0 0      0.00000
HETATM     40 Pt      9.26876      16.25436      14.96615      Pt      0 0      0.00000
HETATM     41 Pt      14.10328      24.62799      14.96615      Pt      0 0      0.00000
HETATM     42 Pt      14.10328      30.21041      14.96615      Pt      0 0      0.00000
HETATM     43 Pt      14.10328      13.46315      14.96615      Pt      0 0      0.00000
HETATM     44 Pt      14.10328      19.04557      14.96615      Pt      0 0      0.00000
HETATM     45 Pt      18.93779      27.41920      14.96615      Pt      0 0      0.00000
HETATM     46 Pt      18.93779      33.00162      14.96615      Pt      0 0      0.00000
HETATM     47 Pt      18.93779      16.25436      14.96615      Pt      0 0      0.00000
HETATM     48 Pt      18.93779      21.83678      14.96615      Pt      0 0      0.00000
HETATM     49 Pt      4.43424      21.83678      14.96615      Pt      0 0      0.00000
HETATM     50 Pt      4.43424      5.08952      14.96615      Pt      0 0      0.00000
HETATM     51 Pt      4.43424      10.67194      14.96615      Pt      0 0      0.00000
HETATM     52 Pt      4.43424      16.25436      14.96615      Pt      0 0      0.00000
HETATM     53 Pt      9.26876      24.62799      14.96615      Pt      0 0      0.00000
HETATM     54 Pt      9.26876      7.88073      14.96615      Pt      0 0      0.00000
HETATM     55 Pt      9.26876      13.46315      14.96615      Pt      0 0      0.00000
HETATM     56 Pt      9.26876      19.04557      14.96615      Pt      0 0      0.00000
HETATM     57 Pt      14.10328      27.41920      14.96615      Pt      0 0      0.00000

```

|        |     |    |          |          |          |    |   |   |         |
|--------|-----|----|----------|----------|----------|----|---|---|---------|
| HETATM | 58  | Pt | 14.10328 | 10.67194 | 14.96615 | Pt | 0 | 0 | 0.00000 |
| HETATM | 59  | Pt | 14.10328 | 16.25436 | 14.96615 | Pt | 0 | 0 | 0.00000 |
| HETATM | 60  | Pt | 14.10328 | 21.83678 | 14.96615 | Pt | 0 | 0 | 0.00000 |
| HETATM | 61  | Pt | 18.93779 | 30.21041 | 14.96615 | Pt | 0 | 0 | 0.00000 |
| HETATM | 62  | Pt | 18.93779 | 13.46315 | 14.96615 | Pt | 0 | 0 | 0.00000 |
| HETATM | 63  | Pt | 18.93779 | 19.04557 | 14.96615 | Pt | 0 | 0 | 0.00000 |
| HETATM | 64  | Pt | 18.93779 | 24.62799 | 14.96615 | Pt | 0 | 0 | 0.00000 |
| HETATM | 65  | Pt | 2.82273  | 19.04557 | 17.24517 | Pt | 0 | 0 | 0.00000 |
| HETATM | 66  | Pt | 2.82273  | 2.29831  | 17.24517 | Pt | 0 | 0 | 0.00000 |
| HETATM | 67  | Pt | 2.82273  | 7.88073  | 17.24517 | Pt | 0 | 0 | 0.00000 |
| HETATM | 68  | Pt | 2.82273  | 13.46315 | 17.24517 | Pt | 0 | 0 | 0.00000 |
| HETATM | 69  | Pt | 7.65725  | 21.83678 | 17.24517 | Pt | 0 | 0 | 0.00000 |
| HETATM | 70  | Pt | 7.65725  | 5.08952  | 17.24517 | Pt | 0 | 0 | 0.00000 |
| HETATM | 71  | Pt | 7.65725  | 10.67194 | 17.24517 | Pt | 0 | 0 | 0.00000 |
| HETATM | 72  | Pt | 7.65725  | 16.25436 | 17.24517 | Pt | 0 | 0 | 0.00000 |
| HETATM | 73  | Pt | 12.49177 | 24.62799 | 17.24517 | Pt | 0 | 0 | 0.00000 |
| HETATM | 74  | Pt | 12.49177 | 7.88073  | 17.24517 | Pt | 0 | 0 | 0.00000 |
| HETATM | 75  | Pt | 12.49177 | 13.46315 | 17.24517 | Pt | 0 | 0 | 0.00000 |
| HETATM | 76  | Pt | 12.49177 | 19.04557 | 17.24517 | Pt | 0 | 0 | 0.00000 |
| HETATM | 77  | Pt | 17.32628 | 27.41920 | 17.24517 | Pt | 0 | 0 | 0.00000 |
| HETATM | 78  | Pt | 17.32628 | 10.67194 | 17.24517 | Pt | 0 | 0 | 0.00000 |
| HETATM | 79  | Pt | 17.32628 | 16.25436 | 17.24517 | Pt | 0 | 0 | 0.00000 |
| HETATM | 80  | Pt | 17.32628 | 21.83678 | 17.24517 | Pt | 0 | 0 | 0.00000 |
| HETATM | 81  | Pt | 2.82273  | 21.83678 | 17.24517 | Pt | 0 | 0 | 0.00000 |
| HETATM | 82  | Pt | 2.82273  | 5.08952  | 17.24517 | Pt | 0 | 0 | 0.00000 |
| HETATM | 83  | Pt | 2.82273  | 10.67194 | 17.24517 | Pt | 0 | 0 | 0.00000 |
| HETATM | 84  | Pt | 2.82273  | 16.25436 | 17.24517 | Pt | 0 | 0 | 0.00000 |
| HETATM | 85  | Pt | 7.65725  | 24.62799 | 17.24517 | Pt | 0 | 0 | 0.00000 |
| HETATM | 86  | Pt | 7.65725  | 7.88073  | 17.24517 | Pt | 0 | 0 | 0.00000 |
| HETATM | 87  | Pt | 7.65725  | 13.46315 | 17.24517 | Pt | 0 | 0 | 0.00000 |
| HETATM | 88  | Pt | 7.65725  | 19.04557 | 17.24517 | Pt | 0 | 0 | 0.00000 |
| HETATM | 89  | Pt | 12.49177 | 27.41920 | 17.24517 | Pt | 0 | 0 | 0.00000 |
| HETATM | 90  | Pt | 12.49177 | 10.67194 | 17.24517 | Pt | 0 | 0 | 0.00000 |
| HETATM | 91  | Pt | 12.49177 | 16.25436 | 17.24517 | Pt | 0 | 0 | 0.00000 |
| HETATM | 92  | Pt | 12.49177 | 21.83678 | 17.24517 | Pt | 0 | 0 | 0.00000 |
| HETATM | 93  | Pt | 17.32628 | 30.21041 | 17.24517 | Pt | 0 | 0 | 0.00000 |
| HETATM | 94  | Pt | 17.32628 | 13.46315 | 17.24517 | Pt | 0 | 0 | 0.00000 |
| HETATM | 95  | Pt | 17.32628 | 19.04557 | 17.24517 | Pt | 0 | 0 | 0.00000 |
| HETATM | 96  | Pt | 17.32628 | 24.62799 | 17.24517 | Pt | 0 | 0 | 0.00000 |
| HETATM | 97  | Pt | 5.23999  | 20.44117 | 17.24517 | Pt | 0 | 0 | 0.00000 |
| HETATM | 98  | Pt | 5.23999  | 3.69391  | 17.24517 | Pt | 0 | 0 | 0.00000 |
| HETATM | 99  | Pt | 5.23999  | 9.27633  | 17.24517 | Pt | 0 | 0 | 0.00000 |
| HETATM | 100 | Pt | 5.23999  | 14.85875 | 17.24517 | Pt | 0 | 0 | 0.00000 |
| HETATM | 101 | Pt | 10.07451 | 23.23238 | 17.24517 | Pt | 0 | 0 | 0.00000 |
| HETATM | 102 | Pt | 10.07451 | 6.48512  | 17.24517 | Pt | 0 | 0 | 0.00000 |
| HETATM | 103 | Pt | 10.07451 | 12.06754 | 17.24517 | Pt | 0 | 0 | 0.00000 |
| HETATM | 104 | Pt | 10.07451 | 17.64996 | 17.24517 | Pt | 0 | 0 | 0.00000 |
| HETATM | 105 | Pt | 14.90903 | 26.02359 | 17.24517 | Pt | 0 | 0 | 0.00000 |
| HETATM | 106 | Pt | 14.90903 | 9.27633  | 17.24517 | Pt | 0 | 0 | 0.00000 |
| HETATM | 107 | Pt | 14.90903 | 14.85875 | 17.24517 | Pt | 0 | 0 | 0.00000 |
| HETATM | 108 | Pt | 14.90903 | 20.44117 | 17.24517 | Pt | 0 | 0 | 0.00000 |
| HETATM | 109 | Pt | 0.40547  | 17.64996 | 17.24517 | Pt | 0 | 0 | 0.00000 |
| HETATM | 110 | Pt | 0.40547  | 0.90270  | 17.24517 | Pt | 0 | 0 | 0.00000 |
| HETATM | 111 | Pt | 0.40547  | 6.48512  | 17.24517 | Pt | 0 | 0 | 0.00000 |
| HETATM | 112 | Pt | 0.40547  | 12.06754 | 17.24517 | Pt | 0 | 0 | 0.00000 |
| HETATM | 113 | Pt | 5.23999  | 23.23238 | 17.24517 | Pt | 0 | 0 | 0.00000 |
| HETATM | 114 | Pt | 5.23999  | 6.48512  | 17.24517 | Pt | 0 | 0 | 0.00000 |
| HETATM | 115 | Pt | 5.23999  | 12.06754 | 17.24517 | Pt | 0 | 0 | 0.00000 |
| HETATM | 116 | Pt | 5.23999  | 17.64996 | 17.24517 | Pt | 0 | 0 | 0.00000 |
| HETATM | 117 | Pt | 10.07451 | 26.02359 | 17.24517 | Pt | 0 | 0 | 0.00000 |
| HETATM | 118 | Pt | 10.07451 | 9.27633  | 17.24517 | Pt | 0 | 0 | 0.00000 |
| HETATM | 119 | Pt | 10.07451 | 14.85875 | 17.24517 | Pt | 0 | 0 | 0.00000 |
| HETATM | 120 | Pt | 10.07451 | 20.44117 | 17.24517 | Pt | 0 | 0 | 0.00000 |

|        |     |    |          |          |          |    |   |   |         |
|--------|-----|----|----------|----------|----------|----|---|---|---------|
| HETATM | 121 | Pt | 14.90903 | 28.81480 | 17.24517 | Pt | 0 | 0 | 0.00000 |
| HETATM | 122 | Pt | 14.90903 | 12.06754 | 17.24517 | Pt | 0 | 0 | 0.00000 |
| HETATM | 123 | Pt | 14.90903 | 17.64996 | 17.24517 | Pt | 0 | 0 | 0.00000 |
| HETATM | 124 | Pt | 14.90903 | 23.23238 | 17.24517 | Pt | 0 | 0 | 0.00000 |
| HETATM | 125 | Pt | 0.40547  | 20.44117 | 17.24517 | Pt | 0 | 0 | 0.00000 |
| HETATM | 126 | Pt | 0.40547  | 3.69391  | 17.24517 | Pt | 0 | 0 | 0.00000 |
| HETATM | 127 | Pt | 0.40547  | 9.27633  | 17.24517 | Pt | 0 | 0 | 0.00000 |
| HETATM | 128 | Pt | 0.40547  | 14.85875 | 17.24517 | Pt | 0 | 0 | 0.00000 |
| HETATM | 129 | Pt | 3.62829  | 20.44082 | 19.52350 | Pt | 0 | 0 | 0.00000 |
| HETATM | 130 | Pt | 3.62829  | 3.69357  | 19.52351 | Pt | 0 | 0 | 0.00000 |
| HETATM | 131 | Pt | 3.62829  | 9.27598  | 19.52350 | Pt | 0 | 0 | 0.00000 |
| HETATM | 132 | Pt | 3.62829  | 14.85840 | 19.52350 | Pt | 0 | 0 | 0.00000 |
| HETATM | 133 | Pt | 8.46280  | 23.23203 | 19.52350 | Pt | 0 | 0 | 0.00000 |
| HETATM | 134 | Pt | 8.46280  | 6.48478  | 19.52350 | Pt | 0 | 0 | 0.00000 |
| HETATM | 135 | Pt | 8.46280  | 12.06720 | 19.52351 | Pt | 0 | 0 | 0.00000 |
| HETATM | 136 | Pt | 8.46280  | 17.64962 | 19.52350 | Pt | 0 | 0 | 0.00000 |
| HETATM | 137 | Pt | 13.29732 | 26.02324 | 19.52350 | Pt | 0 | 0 | 0.00000 |
| HETATM | 138 | Pt | 13.29732 | 9.27599  | 19.52350 | Pt | 0 | 0 | 0.00000 |
| HETATM | 139 | Pt | 13.29732 | 14.85841 | 19.52350 | Pt | 0 | 0 | 0.00000 |
| HETATM | 140 | Pt | 13.29732 | 20.44082 | 19.52350 | Pt | 0 | 0 | 0.00000 |
| HETATM | 141 | Pt | 18.13184 | 28.81446 | 19.52349 | Pt | 0 | 0 | 0.00000 |
| HETATM | 142 | Pt | 18.13184 | 12.06720 | 19.52350 | Pt | 0 | 0 | 0.00000 |
| HETATM | 143 | Pt | 18.13183 | 17.64962 | 19.52350 | Pt | 0 | 0 | 0.00000 |
| HETATM | 144 | Pt | 18.13184 | 23.23203 | 19.52350 | Pt | 0 | 0 | 0.00000 |
| HETATM | 145 | Pt | 3.62829  | 23.23273 | 19.52351 | Pt | 0 | 0 | 0.00000 |
| HETATM | 146 | Pt | 3.62829  | 6.48547  | 19.52350 | Pt | 0 | 0 | 0.00000 |
| HETATM | 147 | Pt | 3.62829  | 12.06789 | 19.52350 | Pt | 0 | 0 | 0.00000 |
| HETATM | 148 | Pt | 3.62829  | 17.65031 | 19.52350 | Pt | 0 | 0 | 0.00000 |
| HETATM | 149 | Pt | 8.46280  | 26.02394 | 19.52350 | Pt | 0 | 0 | 0.00000 |
| HETATM | 150 | Pt | 8.46280  | 9.27668  | 19.52350 | Pt | 0 | 0 | 0.00000 |
| HETATM | 151 | Pt | 8.46280  | 14.85910 | 19.52351 | Pt | 0 | 0 | 0.00000 |
| HETATM | 152 | Pt | 8.46280  | 20.44152 | 19.52350 | Pt | 0 | 0 | 0.00000 |
| HETATM | 153 | Pt | 13.29732 | 28.81515 | 19.52350 | Pt | 0 | 0 | 0.00000 |
| HETATM | 154 | Pt | 13.29732 | 12.06789 | 19.52351 | Pt | 0 | 0 | 0.00000 |
| HETATM | 155 | Pt | 13.29732 | 17.65031 | 19.52350 | Pt | 0 | 0 | 0.00000 |
| HETATM | 156 | Pt | 13.29732 | 23.23273 | 19.52350 | Pt | 0 | 0 | 0.00000 |
| HETATM | 157 | Pt | 18.13184 | 31.60636 | 19.52350 | Pt | 0 | 0 | 0.00000 |
| HETATM | 158 | Pt | 18.13183 | 14.85910 | 19.52350 | Pt | 0 | 0 | 0.00000 |
| HETATM | 159 | Pt | 18.13183 | 20.44152 | 19.52350 | Pt | 0 | 0 | 0.00000 |
| HETATM | 160 | Pt | 18.13184 | 26.02394 | 19.52350 | Pt | 0 | 0 | 0.00000 |
| HETATM | 161 | Pt | 6.04615  | 21.83678 | 19.52351 | Pt | 0 | 0 | 0.00000 |
| HETATM | 162 | Pt | 6.04615  | 5.08952  | 19.52350 | Pt | 0 | 0 | 0.00000 |
| HETATM | 163 | Pt | 6.04615  | 10.67194 | 19.52350 | Pt | 0 | 0 | 0.00000 |
| HETATM | 164 | Pt | 6.04615  | 16.25436 | 19.52350 | Pt | 0 | 0 | 0.00000 |
| HETATM | 165 | Pt | 10.88066 | 24.62799 | 19.52350 | Pt | 0 | 0 | 0.00000 |
| HETATM | 166 | Pt | 10.88066 | 7.88073  | 19.52350 | Pt | 0 | 0 | 0.00000 |
| HETATM | 167 | Pt | 10.88066 | 13.46315 | 19.52351 | Pt | 0 | 0 | 0.00000 |
| HETATM | 168 | Pt | 10.88066 | 19.04557 | 19.52350 | Pt | 0 | 0 | 0.00000 |
| HETATM | 169 | Pt | 15.71518 | 27.41920 | 19.52350 | Pt | 0 | 0 | 0.00000 |
| HETATM | 170 | Pt | 15.71518 | 10.67194 | 19.52350 | Pt | 0 | 0 | 0.00000 |
| HETATM | 171 | Pt | 15.71518 | 16.25436 | 19.52350 | Pt | 0 | 0 | 0.00000 |
| HETATM | 172 | Pt | 15.71518 | 21.83678 | 19.52350 | Pt | 0 | 0 | 0.00000 |
| HETATM | 173 | Pt | 1.21163  | 19.04557 | 19.52350 | Pt | 0 | 0 | 0.00000 |
| HETATM | 174 | Pt | 1.21163  | 2.29831  | 19.52350 | Pt | 0 | 0 | 0.00000 |
| HETATM | 175 | Pt | 1.21163  | 7.88073  | 19.52350 | Pt | 0 | 0 | 0.00000 |
| HETATM | 176 | Pt | 1.21163  | 13.46315 | 19.52350 | Pt | 0 | 0 | 0.00000 |
| HETATM | 177 | Pt | 6.04575  | 24.62799 | 19.52507 | Pt | 0 | 0 | 0.00000 |
| HETATM | 178 | Pt | 6.04575  | 7.88073  | 19.52506 | Pt | 0 | 0 | 0.00000 |
| HETATM | 179 | Pt | 6.04575  | 13.46315 | 19.52507 | Pt | 0 | 0 | 0.00000 |
| HETATM | 180 | Pt | 6.04575  | 19.04557 | 19.52507 | Pt | 0 | 0 | 0.00000 |
| HETATM | 181 | Pt | 10.88026 | 27.41920 | 19.52507 | Pt | 0 | 0 | 0.00000 |
| HETATM | 182 | Pt | 10.88026 | 10.67194 | 19.52507 | Pt | 0 | 0 | 0.00000 |
| HETATM | 183 | Pt | 10.88026 | 16.25436 | 19.52507 | Pt | 0 | 0 | 0.00000 |

|        |     |    |          |          |          |    |   |   |         |
|--------|-----|----|----------|----------|----------|----|---|---|---------|
| HETATM | 184 | Pt | 10.88026 | 21.83677 | 19.52507 | Pt | 0 | 0 | 0.00000 |
| HETATM | 185 | Pt | 15.71478 | 30.21041 | 19.52507 | Pt | 0 | 0 | 0.00000 |
| HETATM | 186 | Pt | 15.71478 | 13.46315 | 19.52507 | Pt | 0 | 0 | 0.00000 |
| HETATM | 187 | Pt | 15.71477 | 19.04557 | 19.52507 | Pt | 0 | 0 | 0.00000 |
| HETATM | 188 | Pt | 15.71478 | 24.62799 | 19.52507 | Pt | 0 | 0 | 0.00000 |
| HETATM | 189 | Pt | 1.21123  | 21.83678 | 19.52506 | Pt | 0 | 0 | 0.00000 |
| HETATM | 190 | Pt | 1.21123  | 5.08952  | 19.52507 | Pt | 0 | 0 | 0.00000 |
| HETATM | 191 | Pt | 1.21123  | 10.67194 | 19.52507 | Pt | 0 | 0 | 0.00000 |
| HETATM | 192 | Pt | 1.21123  | 16.25436 | 19.52506 | Pt | 0 | 0 | 0.00000 |
| HETATM | 193 | Pt | 2.01741  | 17.65071 | 21.80406 | Pt | 0 | 0 | 0.00000 |
| HETATM | 194 | Pt | 2.01741  | 23.23313 | 21.80407 | Pt | 0 | 0 | 0.00000 |
| HETATM | 195 | Pt | 2.01742  | 6.48587  | 21.80407 | Pt | 0 | 0 | 0.00000 |
| HETATM | 196 | Pt | 2.01742  | 12.06829 | 21.80407 | Pt | 0 | 0 | 0.00000 |
| HETATM | 197 | Pt | 6.85193  | 20.44192 | 21.80407 | Pt | 0 | 0 | 0.00000 |
| HETATM | 198 | Pt | 6.85193  | 26.02435 | 21.80407 | Pt | 0 | 0 | 0.00000 |
| HETATM | 199 | Pt | 6.85193  | 9.27708  | 21.80407 | Pt | 0 | 0 | 0.00000 |
| HETATM | 200 | Pt | 6.85193  | 14.85950 | 21.80407 | Pt | 0 | 0 | 0.00000 |
| HETATM | 201 | Pt | 11.68645 | 23.23313 | 21.80407 | Pt | 0 | 0 | 0.00000 |
| HETATM | 202 | Pt | 11.68645 | 28.81555 | 21.80407 | Pt | 0 | 0 | 0.00000 |
| HETATM | 203 | Pt | 11.68644 | 12.06829 | 21.80407 | Pt | 0 | 0 | 0.00000 |
| HETATM | 204 | Pt | 11.68645 | 17.65072 | 21.80407 | Pt | 0 | 0 | 0.00000 |
| HETATM | 205 | Pt | 16.52096 | 26.02434 | 21.80407 | Pt | 0 | 0 | 0.00000 |
| HETATM | 206 | Pt | 16.52097 | 31.60676 | 21.80406 | Pt | 0 | 0 | 0.00000 |
| HETATM | 207 | Pt | 16.52097 | 14.85950 | 21.80407 | Pt | 0 | 0 | 0.00000 |
| HETATM | 208 | Pt | 16.52096 | 20.44192 | 21.80407 | Pt | 0 | 0 | 0.00000 |
| HETATM | 209 | Pt | 2.01741  | 20.44042 | 21.80407 | Pt | 0 | 0 | 0.00000 |
| HETATM | 210 | Pt | 2.01741  | 3.69316  | 21.80407 | Pt | 0 | 0 | 0.00000 |
| HETATM | 211 | Pt | 2.01742  | 9.27559  | 21.80407 | Pt | 0 | 0 | 0.00000 |
| HETATM | 212 | Pt | 2.01741  | 14.85801 | 21.80407 | Pt | 0 | 0 | 0.00000 |
| HETATM | 213 | Pt | 6.85193  | 23.23164 | 21.80407 | Pt | 0 | 0 | 0.00000 |
| HETATM | 214 | Pt | 6.85193  | 6.48438  | 21.80407 | Pt | 0 | 0 | 0.00000 |
| HETATM | 215 | Pt | 6.85192  | 12.06679 | 21.80407 | Pt | 0 | 0 | 0.00000 |
| HETATM | 216 | Pt | 6.85193  | 17.64921 | 21.80407 | Pt | 0 | 0 | 0.00000 |
| HETATM | 217 | Pt | 11.68644 | 26.02285 | 21.80407 | Pt | 0 | 0 | 0.00000 |
| HETATM | 218 | Pt | 11.68645 | 9.27558  | 21.80407 | Pt | 0 | 0 | 0.00000 |
| HETATM | 219 | Pt | 11.68645 | 14.85801 | 21.80407 | Pt | 0 | 0 | 0.00000 |
| HETATM | 220 | Pt | 11.68645 | 20.44043 | 21.80407 | Pt | 0 | 0 | 0.00000 |
| HETATM | 221 | Pt | 16.52097 | 28.81406 | 21.80406 | Pt | 0 | 0 | 0.00000 |
| HETATM | 222 | Pt | 16.52097 | 12.06679 | 21.80407 | Pt | 0 | 0 | 0.00000 |
| HETATM | 223 | Pt | 16.52096 | 17.64922 | 21.80407 | Pt | 0 | 0 | 0.00000 |
| HETATM | 224 | Pt | 16.52096 | 23.23164 | 21.80407 | Pt | 0 | 0 | 0.00000 |
| HETATM | 225 | Pt | 4.43338  | 19.04557 | 21.80407 | Pt | 0 | 0 | 0.00000 |
| HETATM | 226 | Pt | 4.43338  | 24.62799 | 21.80407 | Pt | 0 | 0 | 0.00000 |
| HETATM | 227 | Pt | 4.43338  | 7.88073  | 21.80407 | Pt | 0 | 0 | 0.00000 |
| HETATM | 228 | Pt | 4.43338  | 13.46315 | 21.80407 | Pt | 0 | 0 | 0.00000 |
| HETATM | 229 | Pt | 9.26789  | 21.83678 | 21.80407 | Pt | 0 | 0 | 0.00000 |
| HETATM | 230 | Pt | 9.26789  | 27.41920 | 21.80407 | Pt | 0 | 0 | 0.00000 |
| HETATM | 231 | Pt | 9.26789  | 10.67194 | 21.80407 | Pt | 0 | 0 | 0.00000 |
| HETATM | 232 | Pt | 9.26789  | 16.25436 | 21.80407 | Pt | 0 | 0 | 0.00000 |
| HETATM | 233 | Pt | 14.10241 | 24.62799 | 21.80407 | Pt | 0 | 0 | 0.00000 |
| HETATM | 234 | Pt | 14.10241 | 30.21041 | 21.80407 | Pt | 0 | 0 | 0.00000 |
| HETATM | 235 | Pt | 14.10241 | 13.46315 | 21.80407 | Pt | 0 | 0 | 0.00000 |
| HETATM | 236 | Pt | 14.10241 | 19.04557 | 21.80407 | Pt | 0 | 0 | 0.00000 |
| HETATM | 237 | Pt | 18.93693 | 27.41920 | 21.80406 | Pt | 0 | 0 | 0.00000 |
| HETATM | 238 | Pt | 18.93693 | 33.00161 | 21.80406 | Pt | 0 | 0 | 0.00000 |
| HETATM | 239 | Pt | 18.93693 | 16.25436 | 21.80407 | Pt | 0 | 0 | 0.00000 |
| HETATM | 240 | Pt | 18.93693 | 21.83678 | 21.80407 | Pt | 0 | 0 | 0.00000 |
| HETATM | 241 | Pt | 4.43424  | 21.83678 | 21.79811 | Pt | 0 | 0 | 0.00000 |
| HETATM | 242 | Pt | 4.43424  | 5.08952  | 21.79811 | Pt | 0 | 0 | 0.00000 |
| HETATM | 243 | Pt | 4.43424  | 10.67194 | 21.79811 | Pt | 0 | 0 | 0.00000 |
| HETATM | 244 | Pt | 4.43424  | 16.25436 | 21.79811 | Pt | 0 | 0 | 0.00000 |
| HETATM | 245 | Pt | 9.26876  | 24.62799 | 21.79810 | Pt | 0 | 0 | 0.00000 |
| HETATM | 246 | Pt | 9.26875  | 7.88073  | 21.79810 | Pt | 0 | 0 | 0.00000 |

|        |     |    |          |          |          |    |   |   |         |
|--------|-----|----|----------|----------|----------|----|---|---|---------|
| HETATM | 247 | Pt | 9.26875  | 13.46315 | 21.79810 | Pt | 0 | 0 | 0.00000 |
| HETATM | 248 | Pt | 9.26876  | 19.04557 | 21.79810 | Pt | 0 | 0 | 0.00000 |
| HETATM | 249 | Pt | 14.10327 | 27.41920 | 21.79810 | Pt | 0 | 0 | 0.00000 |
| HETATM | 250 | Pt | 14.10328 | 10.67194 | 21.79810 | Pt | 0 | 0 | 0.00000 |
| HETATM | 251 | Pt | 14.10327 | 16.25436 | 21.79810 | Pt | 0 | 0 | 0.00000 |
| HETATM | 252 | Pt | 14.10327 | 21.83678 | 21.79810 | Pt | 0 | 0 | 0.00000 |
| HETATM | 253 | Pt | 18.93779 | 30.21041 | 21.79810 | Pt | 0 | 0 | 0.00000 |
| HETATM | 254 | Pt | 18.93779 | 13.46315 | 21.79810 | Pt | 0 | 0 | 0.00000 |
| HETATM | 255 | Pt | 18.93779 | 19.04557 | 21.79810 | Pt | 0 | 0 | 0.00000 |
| HETATM | 256 | Pt | 18.93779 | 24.62799 | 21.79810 | Pt | 0 | 0 | 0.00000 |
| HETATM | 257 | Pt | 2.82274  | 19.04557 | 24.09074 | Pt | 0 | 0 | 0.00000 |
| HETATM | 258 | Pt | 2.82273  | 2.29830  | 24.09074 | Pt | 0 | 0 | 0.00000 |
| HETATM | 259 | Pt | 2.82273  | 7.88073  | 24.09073 | Pt | 0 | 0 | 0.00000 |
| HETATM | 260 | Pt | 2.82272  | 13.46315 | 24.09074 | Pt | 0 | 0 | 0.00000 |
| HETATM | 261 | Pt | 7.65725  | 21.83678 | 24.09074 | Pt | 0 | 0 | 0.00000 |
| HETATM | 262 | Pt | 7.65725  | 5.08952  | 24.09074 | Pt | 0 | 0 | 0.00000 |
| HETATM | 263 | Pt | 7.65725  | 10.67194 | 24.09074 | Pt | 0 | 0 | 0.00000 |
| HETATM | 264 | Pt | 7.65725  | 16.25435 | 24.09074 | Pt | 0 | 0 | 0.00000 |
| HETATM | 265 | Pt | 12.49177 | 24.62799 | 24.09074 | Pt | 0 | 0 | 0.00000 |
| HETATM | 266 | Pt | 12.49178 | 7.88073  | 24.09074 | Pt | 0 | 0 | 0.00000 |
| HETATM | 267 | Pt | 12.49177 | 13.46314 | 24.09074 | Pt | 0 | 0 | 0.00000 |
| HETATM | 268 | Pt | 12.49177 | 19.04557 | 24.09073 | Pt | 0 | 0 | 0.00000 |
| HETATM | 269 | Pt | 17.32628 | 27.41919 | 24.09074 | Pt | 0 | 0 | 0.00000 |
| HETATM | 270 | Pt | 17.32628 | 10.67194 | 24.09073 | Pt | 0 | 0 | 0.00000 |
| HETATM | 271 | Pt | 17.32629 | 16.25436 | 24.09073 | Pt | 0 | 0 | 0.00000 |
| HETATM | 272 | Pt | 17.32629 | 21.83678 | 24.09074 | Pt | 0 | 0 | 0.00000 |
| HETATM | 273 | Pt | 2.82887  | 21.83678 | 24.07818 | Pt | 0 | 0 | 0.00000 |
| HETATM | 274 | Pt | 2.82887  | 5.08951  | 24.07817 | Pt | 0 | 0 | 0.00000 |
| HETATM | 275 | Pt | 2.82886  | 10.67194 | 24.07817 | Pt | 0 | 0 | 0.00000 |
| HETATM | 276 | Pt | 2.82886  | 16.25436 | 24.07817 | Pt | 0 | 0 | 0.00000 |
| HETATM | 277 | Pt | 7.66339  | 24.62799 | 24.07817 | Pt | 0 | 0 | 0.00000 |
| HETATM | 278 | Pt | 7.66339  | 7.88073  | 24.07817 | Pt | 0 | 0 | 0.00000 |
| HETATM | 279 | Pt | 7.66339  | 13.46315 | 24.07816 | Pt | 0 | 0 | 0.00000 |
| HETATM | 280 | Pt | 7.66339  | 19.04557 | 24.07816 | Pt | 0 | 0 | 0.00000 |
| HETATM | 281 | Pt | 12.49791 | 27.41920 | 24.07817 | Pt | 0 | 0 | 0.00000 |
| HETATM | 282 | Pt | 12.49791 | 10.67194 | 24.07817 | Pt | 0 | 0 | 0.00000 |
| HETATM | 283 | Pt | 12.49791 | 16.25436 | 24.07816 | Pt | 0 | 0 | 0.00000 |
| HETATM | 284 | Pt | 12.49790 | 21.83678 | 24.07817 | Pt | 0 | 0 | 0.00000 |
| HETATM | 285 | Pt | 17.33242 | 30.21041 | 24.07817 | Pt | 0 | 0 | 0.00000 |
| HETATM | 286 | Pt | 17.33242 | 13.46315 | 24.07816 | Pt | 0 | 0 | 0.00000 |
| HETATM | 287 | Pt | 17.33243 | 19.04557 | 24.07816 | Pt | 0 | 0 | 0.00000 |
| HETATM | 288 | Pt | 17.33242 | 24.62798 | 24.07817 | Pt | 0 | 0 | 0.00000 |
| HETATM | 289 | Pt | 5.23693  | 20.44649 | 24.07818 | Pt | 0 | 0 | 0.00000 |
| HETATM | 290 | Pt | 5.23692  | 3.69922  | 24.07817 | Pt | 0 | 0 | 0.00000 |
| HETATM | 291 | Pt | 5.23692  | 9.28165  | 24.07817 | Pt | 0 | 0 | 0.00000 |
| HETATM | 292 | Pt | 5.23693  | 14.86407 | 24.07817 | Pt | 0 | 0 | 0.00000 |
| HETATM | 293 | Pt | 10.07144 | 23.23770 | 24.07816 | Pt | 0 | 0 | 0.00000 |
| HETATM | 294 | Pt | 10.07145 | 6.49044  | 24.07816 | Pt | 0 | 0 | 0.00000 |
| HETATM | 295 | Pt | 10.07144 | 12.07286 | 24.07816 | Pt | 0 | 0 | 0.00000 |
| HETATM | 296 | Pt | 10.07144 | 17.65528 | 24.07816 | Pt | 0 | 0 | 0.00000 |
| HETATM | 297 | Pt | 14.90596 | 26.02890 | 24.07817 | Pt | 0 | 0 | 0.00000 |
| HETATM | 298 | Pt | 14.90596 | 9.28165  | 24.07817 | Pt | 0 | 0 | 0.00000 |
| HETATM | 299 | Pt | 14.90596 | 14.86407 | 24.07815 | Pt | 0 | 0 | 0.00000 |
| HETATM | 300 | Pt | 14.90596 | 20.44649 | 24.07816 | Pt | 0 | 0 | 0.00000 |
| HETATM | 301 | Pt | 0.40241  | 17.65527 | 24.07817 | Pt | 0 | 0 | 0.00000 |
| HETATM | 302 | Pt | 0.40241  | 0.90802  | 24.07817 | Pt | 0 | 0 | 0.00000 |
| HETATM | 303 | Pt | 0.40241  | 6.49044  | 24.07817 | Pt | 0 | 0 | 0.00000 |
| HETATM | 304 | Pt | 0.40240  | 12.07286 | 24.07818 | Pt | 0 | 0 | 0.00000 |
| HETATM | 305 | Pt | 5.23692  | 23.22707 | 24.07818 | Pt | 0 | 0 | 0.00000 |
| HETATM | 306 | Pt | 5.23693  | 6.47981  | 24.07817 | Pt | 0 | 0 | 0.00000 |
| HETATM | 307 | Pt | 5.23692  | 12.06223 | 24.07817 | Pt | 0 | 0 | 0.00000 |
| HETATM | 308 | Pt | 5.23693  | 17.64465 | 24.07817 | Pt | 0 | 0 | 0.00000 |
| HETATM | 309 | Pt | 10.07144 | 26.01828 | 24.07817 | Pt | 0 | 0 | 0.00000 |

|        |     |    |          |          |          |    |   |   |         |
|--------|-----|----|----------|----------|----------|----|---|---|---------|
| HETATM | 310 | Pt | 10.07144 | 9.27102  | 24.07816 | Pt | 0 | 0 | 0.00000 |
| HETATM | 311 | Pt | 10.07144 | 14.85343 | 24.07815 | Pt | 0 | 0 | 0.00000 |
| HETATM | 312 | Pt | 10.07144 | 20.43586 | 24.07816 | Pt | 0 | 0 | 0.00000 |
| HETATM | 313 | Pt | 14.90596 | 28.80949 | 24.07817 | Pt | 0 | 0 | 0.00000 |
| HETATM | 314 | Pt | 14.90595 | 12.06223 | 24.07817 | Pt | 0 | 0 | 0.00000 |
| HETATM | 315 | Pt | 14.90596 | 17.64465 | 24.07816 | Pt | 0 | 0 | 0.00000 |
| HETATM | 316 | Pt | 14.90596 | 23.22707 | 24.07816 | Pt | 0 | 0 | 0.00000 |
| HETATM | 317 | Pt | 0.40241  | 20.43587 | 24.07817 | Pt | 0 | 0 | 0.00000 |
| HETATM | 318 | Pt | 0.40241  | 3.68860  | 24.07817 | Pt | 0 | 0 | 0.00000 |
| HETATM | 319 | Pt | 0.40241  | 9.27102  | 24.07817 | Pt | 0 | 0 | 0.00000 |
| HETATM | 320 | Pt | 0.40241  | 14.85344 | 24.07818 | Pt | 0 | 0 | 0.00000 |
| HETATM | 321 | Pt | 3.62389  | 20.43323 | 26.38085 | Pt | 0 | 0 | 0.00000 |
| HETATM | 322 | Pt | 3.62389  | 3.68595  | 26.38083 | Pt | 0 | 0 | 0.00000 |
| HETATM | 323 | Pt | 3.62388  | 9.26838  | 26.38083 | Pt | 0 | 0 | 0.00000 |
| HETATM | 324 | Pt | 3.62388  | 14.85080 | 26.38084 | Pt | 0 | 0 | 0.00000 |
| HETATM | 325 | Pt | 8.45840  | 23.22443 | 26.38084 | Pt | 0 | 0 | 0.00000 |
| HETATM | 326 | Pt | 8.45841  | 6.47717  | 26.38083 | Pt | 0 | 0 | 0.00000 |
| HETATM | 327 | Pt | 8.45841  | 12.05959 | 26.38084 | Pt | 0 | 0 | 0.00000 |
| HETATM | 328 | Pt | 8.45840  | 17.64201 | 26.38083 | Pt | 0 | 0 | 0.00000 |
| HETATM | 329 | Pt | 13.29293 | 26.01563 | 26.38086 | Pt | 0 | 0 | 0.00000 |
| HETATM | 330 | Pt | 13.29293 | 9.26838  | 26.38085 | Pt | 0 | 0 | 0.00000 |
| HETATM | 331 | Pt | 13.29293 | 14.85078 | 26.38083 | Pt | 0 | 0 | 0.00000 |
| HETATM | 332 | Pt | 13.29293 | 20.43321 | 26.38085 | Pt | 0 | 0 | 0.00000 |
| HETATM | 333 | Pt | 18.12744 | 28.80684 | 26.38084 | Pt | 0 | 0 | 0.00000 |
| HETATM | 334 | Pt | 18.12745 | 12.05959 | 26.38084 | Pt | 0 | 0 | 0.00000 |
| HETATM | 335 | Pt | 18.12745 | 17.64201 | 26.38085 | Pt | 0 | 0 | 0.00000 |
| HETATM | 336 | Pt | 18.12744 | 23.22442 | 26.38087 | Pt | 0 | 0 | 0.00000 |
| HETATM | 337 | Pt | 3.62389  | 23.24034 | 26.38085 | Pt | 0 | 0 | 0.00000 |
| HETATM | 338 | Pt | 3.62388  | 6.49307  | 26.38083 | Pt | 0 | 0 | 0.00000 |
| HETATM | 339 | Pt | 3.62388  | 12.07550 | 26.38082 | Pt | 0 | 0 | 0.00000 |
| HETATM | 340 | Pt | 3.62389  | 17.65792 | 26.38083 | Pt | 0 | 0 | 0.00000 |
| HETATM | 341 | Pt | 8.45841  | 26.03155 | 26.38085 | Pt | 0 | 0 | 0.00000 |
| HETATM | 342 | Pt | 8.45841  | 9.28430  | 26.38083 | Pt | 0 | 0 | 0.00000 |
| HETATM | 343 | Pt | 8.45841  | 14.86670 | 26.38083 | Pt | 0 | 0 | 0.00000 |
| HETATM | 344 | Pt | 8.45841  | 20.44913 | 26.38083 | Pt | 0 | 0 | 0.00000 |
| HETATM | 345 | Pt | 13.29293 | 28.82277 | 26.38085 | Pt | 0 | 0 | 0.00000 |
| HETATM | 346 | Pt | 13.29293 | 12.07551 | 26.38086 | Pt | 0 | 0 | 0.00000 |
| HETATM | 347 | Pt | 13.29293 | 17.65792 | 26.38084 | Pt | 0 | 0 | 0.00000 |
| HETATM | 348 | Pt | 13.29294 | 23.24035 | 26.38084 | Pt | 0 | 0 | 0.00000 |
| HETATM | 349 | Pt | 18.12744 | 31.61398 | 26.38084 | Pt | 0 | 0 | 0.00000 |
| HETATM | 350 | Pt | 18.12744 | 14.86672 | 26.38085 | Pt | 0 | 0 | 0.00000 |
| HETATM | 351 | Pt | 18.12745 | 20.44913 | 26.38084 | Pt | 0 | 0 | 0.00000 |
| HETATM | 352 | Pt | 18.12745 | 26.03154 | 26.38086 | Pt | 0 | 0 | 0.00000 |
| HETATM | 353 | Pt | 6.05494  | 21.83678 | 26.38087 | Pt | 0 | 0 | 0.00000 |
| HETATM | 354 | Pt | 6.05494  | 5.08951  | 26.38084 | Pt | 0 | 0 | 0.00000 |
| HETATM | 355 | Pt | 6.05494  | 10.67194 | 26.38084 | Pt | 0 | 0 | 0.00000 |
| HETATM | 356 | Pt | 6.05495  | 16.25436 | 26.38086 | Pt | 0 | 0 | 0.00000 |
| HETATM | 357 | Pt | 10.88944 | 24.62799 | 26.38083 | Pt | 0 | 0 | 0.00000 |
| HETATM | 358 | Pt | 10.88946 | 7.88073  | 26.38082 | Pt | 0 | 0 | 0.00000 |
| HETATM | 359 | Pt | 10.88945 | 13.46314 | 26.38083 | Pt | 0 | 0 | 0.00000 |
| HETATM | 360 | Pt | 10.88945 | 19.04557 | 26.38083 | Pt | 0 | 0 | 0.00000 |
| HETATM | 361 | Pt | 15.72396 | 27.41920 | 26.38084 | Pt | 0 | 0 | 0.00000 |
| HETATM | 362 | Pt | 15.72395 | 10.67194 | 26.38084 | Pt | 0 | 0 | 0.00000 |
| HETATM | 363 | Pt | 15.72397 | 16.25436 | 26.38081 | Pt | 0 | 0 | 0.00000 |
| HETATM | 364 | Pt | 15.72397 | 21.83679 | 26.38082 | Pt | 0 | 0 | 0.00000 |
| HETATM | 365 | Pt | 1.22043  | 19.04557 | 26.38085 | Pt | 0 | 0 | 0.00000 |
| HETATM | 366 | Pt | 1.22042  | 2.29831  | 26.38085 | Pt | 0 | 0 | 0.00000 |
| HETATM | 367 | Pt | 1.22042  | 7.88073  | 26.38086 | Pt | 0 | 0 | 0.00000 |
| HETATM | 368 | Pt | 1.22041  | 13.46315 | 26.38087 | Pt | 0 | 0 | 0.00000 |
| HETATM | 369 | Pt | 6.04575  | 24.62799 | 26.30465 | Pt | 0 | 0 | 0.00000 |
| HETATM | 370 | Pt | 6.04575  | 7.88073  | 26.30465 | Pt | 0 | 0 | 0.00000 |
| HETATM | 371 | Pt | 6.04575  | 13.46315 | 26.30464 | Pt | 0 | 0 | 0.00000 |
| HETATM | 372 | Pt | 6.04575  | 19.04557 | 26.30464 | Pt | 0 | 0 | 0.00000 |

|        |     |    |          |          |          |    |   |   |         |
|--------|-----|----|----------|----------|----------|----|---|---|---------|
| HETATM | 373 | Pt | 10.88027 | 27.41920 | 26.30464 | Pt | 0 | 0 | 0.00000 |
| HETATM | 374 | Pt | 10.88026 | 10.67194 | 26.30462 | Pt | 0 | 0 | 0.00000 |
| HETATM | 375 | Pt | 10.88026 | 16.25436 | 26.30461 | Pt | 0 | 0 | 0.00000 |
| HETATM | 376 | Pt | 10.88026 | 21.83678 | 26.30463 | Pt | 0 | 0 | 0.00000 |
| HETATM | 377 | Pt | 15.71478 | 30.21041 | 26.30467 | Pt | 0 | 0 | 0.00000 |
| HETATM | 378 | Pt | 15.71478 | 13.46315 | 26.30465 | Pt | 0 | 0 | 0.00000 |
| HETATM | 379 | Pt | 15.71478 | 19.04557 | 26.30464 | Pt | 0 | 0 | 0.00000 |
| HETATM | 380 | Pt | 15.71478 | 24.62799 | 26.30466 | Pt | 0 | 0 | 0.00000 |
| HETATM | 381 | Pt | 1.21123  | 21.83678 | 26.30468 | Pt | 0 | 0 | 0.00000 |
| HETATM | 382 | Pt | 1.21122  | 5.08952  | 26.30466 | Pt | 0 | 0 | 0.00000 |
| HETATM | 383 | Pt | 1.21122  | 10.67194 | 26.30466 | Pt | 0 | 0 | 0.00000 |
| HETATM | 384 | Pt | 1.21122  | 16.25436 | 26.30468 | Pt | 0 | 0 | 0.00000 |
| HETATM | 385 | Pt | 2.02970  | 17.67196 | 28.75841 | Pt | 0 | 0 | 0.00000 |
| HETATM | 386 | Pt | 2.02968  | 23.25438 | 28.75839 | Pt | 0 | 0 | 0.00000 |
| HETATM | 387 | Pt | 2.02967  | 6.50711  | 28.75839 | Pt | 0 | 0 | 0.00000 |
| HETATM | 388 | Pt | 2.02968  | 12.08952 | 28.75839 | Pt | 0 | 0 | 0.00000 |
| HETATM | 389 | Pt | 6.86420  | 20.46316 | 28.75837 | Pt | 0 | 0 | 0.00000 |
| HETATM | 390 | Pt | 6.86420  | 26.04559 | 28.75839 | Pt | 0 | 0 | 0.00000 |
| HETATM | 391 | Pt | 6.86421  | 9.29834  | 28.75839 | Pt | 0 | 0 | 0.00000 |
| HETATM | 392 | Pt | 6.86422  | 14.88073 | 28.75839 | Pt | 0 | 0 | 0.00000 |
| HETATM | 393 | Pt | 11.69870 | 23.25436 | 28.75831 | Pt | 0 | 0 | 0.00000 |
| HETATM | 394 | Pt | 11.69870 | 28.83681 | 28.75835 | Pt | 0 | 0 | 0.00000 |
| HETATM | 395 | Pt | 11.69869 | 12.08954 | 28.75837 | Pt | 0 | 0 | 0.00000 |
| HETATM | 396 | Pt | 11.69870 | 17.67195 | 28.75835 | Pt | 0 | 0 | 0.00000 |
| HETATM | 397 | Pt | 16.53320 | 26.04555 | 28.75834 | Pt | 0 | 0 | 0.00000 |
| HETATM | 398 | Pt | 16.53321 | 31.62801 | 28.75838 | Pt | 0 | 0 | 0.00000 |
| HETATM | 399 | Pt | 16.53321 | 14.88073 | 28.75836 | Pt | 0 | 0 | 0.00000 |
| HETATM | 400 | Pt | 16.53320 | 20.46312 | 28.75831 | Pt | 0 | 0 | 0.00000 |
| HETATM | 401 | Pt | 2.02969  | 20.41919 | 28.75841 | Pt | 0 | 0 | 0.00000 |
| HETATM | 402 | Pt | 2.02967  | 3.67194  | 28.75837 | Pt | 0 | 0 | 0.00000 |
| HETATM | 403 | Pt | 2.02969  | 9.25434  | 28.75840 | Pt | 0 | 0 | 0.00000 |
| HETATM | 404 | Pt | 2.02969  | 14.83675 | 28.75841 | Pt | 0 | 0 | 0.00000 |
| HETATM | 405 | Pt | 6.86421  | 23.21040 | 28.75840 | Pt | 0 | 0 | 0.00000 |
| HETATM | 406 | Pt | 6.86420  | 6.46314  | 28.75836 | Pt | 0 | 0 | 0.00000 |
| HETATM | 407 | Pt | 6.86421  | 12.04556 | 28.75837 | Pt | 0 | 0 | 0.00000 |
| HETATM | 408 | Pt | 6.86421  | 17.62796 | 28.75841 | Pt | 0 | 0 | 0.00000 |
| HETATM | 409 | Pt | 11.69869 | 26.00159 | 28.75837 | Pt | 0 | 0 | 0.00000 |
| HETATM | 410 | Pt | 11.69868 | 9.25437  | 28.75832 | Pt | 0 | 0 | 0.00000 |
| HETATM | 411 | Pt | 11.69870 | 14.83678 | 28.75831 | Pt | 0 | 0 | 0.00000 |
| HETATM | 412 | Pt | 11.69872 | 20.41916 | 28.75838 | Pt | 0 | 0 | 0.00000 |
| HETATM | 413 | Pt | 16.53321 | 28.79283 | 28.75836 | Pt | 0 | 0 | 0.00000 |
| HETATM | 414 | Pt | 16.53320 | 12.04561 | 28.75832 | Pt | 0 | 0 | 0.00000 |
| HETATM | 415 | Pt | 16.53320 | 17.62799 | 28.75833 | Pt | 0 | 0 | 0.00000 |
| HETATM | 416 | Pt | 16.53322 | 23.21040 | 28.75837 | Pt | 0 | 0 | 0.00000 |
| HETATM | 417 | Pt | 4.40891  | 19.04557 | 28.75829 | Pt | 0 | 0 | 0.00000 |
| HETATM | 418 | Pt | 4.40889  | 24.62800 | 28.75831 | Pt | 0 | 0 | 0.00000 |
| HETATM | 419 | Pt | 4.40888  | 7.88073  | 28.75830 | Pt | 0 | 0 | 0.00000 |
| HETATM | 420 | Pt | 4.40890  | 13.46314 | 28.75828 | Pt | 0 | 0 | 0.00000 |
| HETATM | 421 | Pt | 9.24340  | 21.83677 | 28.75831 | Pt | 0 | 0 | 0.00000 |
| HETATM | 422 | Pt | 9.24337  | 27.41920 | 28.75835 | Pt | 0 | 0 | 0.00000 |
| HETATM | 423 | Pt | 9.24339  | 10.67195 | 28.75835 | Pt | 0 | 0 | 0.00000 |
| HETATM | 424 | Pt | 9.24341  | 16.25436 | 28.75831 | Pt | 0 | 0 | 0.00000 |
| HETATM | 425 | Pt | 14.07787 | 24.62799 | 28.75844 | Pt | 0 | 0 | 0.00000 |
| HETATM | 426 | Pt | 14.07787 | 30.21042 | 28.75843 | Pt | 0 | 0 | 0.00000 |
| HETATM | 427 | Pt | 14.07788 | 13.46315 | 28.75843 | Pt | 0 | 0 | 0.00000 |
| HETATM | 428 | Pt | 14.07788 | 19.04556 | 28.75843 | Pt | 0 | 0 | 0.00000 |
| HETATM | 429 | Pt | 18.91236 | 27.41919 | 28.75840 | Pt | 0 | 0 | 0.00000 |
| HETATM | 430 | Pt | 18.91235 | 33.00163 | 28.75842 | Pt | 0 | 0 | 0.00000 |
| HETATM | 431 | Pt | 18.91236 | 16.25437 | 28.75843 | Pt | 0 | 0 | 0.00000 |
| HETATM | 432 | Pt | 18.91238 | 21.83677 | 28.75841 | Pt | 0 | 0 | 0.00000 |
| HETATM | 433 | Pt | 4.43427  | 21.83680 | 28.58843 | Pt | 0 | 0 | 0.00000 |
| HETATM | 434 | Pt | 4.43425  | 5.08952  | 28.58839 | Pt | 0 | 0 | 0.00000 |
| HETATM | 435 | Pt | 4.43426  | 10.67193 | 28.58837 | Pt | 0 | 0 | 0.00000 |

|        |     |    |          |          |          |    |   |   |         |
|--------|-----|----|----------|----------|----------|----|---|---|---------|
| HETATM | 436 | Pt | 4.43428  | 16.25435 | 28.58839 | Pt | 0 | 0 | 0.00000 |
| HETATM | 437 | Pt | 9.26875  | 24.62798 | 28.58840 | Pt | 0 | 0 | 0.00000 |
| HETATM | 438 | Pt | 9.26875  | 7.88074  | 28.58838 | Pt | 0 | 0 | 0.00000 |
| HETATM | 439 | Pt | 9.26877  | 13.46315 | 28.58842 | Pt | 0 | 0 | 0.00000 |
| HETATM | 440 | Pt | 9.26875  | 19.04557 | 28.58839 | Pt | 0 | 0 | 0.00000 |
| HETATM | 441 | Pt | 14.10324 | 27.41920 | 28.58841 | Pt | 0 | 0 | 0.00000 |
| HETATM | 442 | Pt | 14.10324 | 10.67196 | 28.58842 | Pt | 0 | 0 | 0.00000 |
| HETATM | 443 | Pt | 14.10326 | 16.25435 | 28.58838 | Pt | 0 | 0 | 0.00000 |
| HETATM | 444 | Pt | 14.10327 | 21.83678 | 28.58839 | Pt | 0 | 0 | 0.00000 |
| HETATM | 445 | Pt | 18.93780 | 30.21041 | 28.58836 | Pt | 0 | 0 | 0.00000 |
| HETATM | 446 | Pt | 18.93780 | 13.46317 | 28.58840 | Pt | 0 | 0 | 0.00000 |
| HETATM | 447 | Pt | 18.93779 | 19.04557 | 28.58841 | Pt | 0 | 0 | 0.00000 |
| HETATM | 448 | Pt | 18.93780 | 24.62797 | 28.58844 | Pt | 0 | 0 | 0.00000 |
| HETATM | 449 | O  | 2.82273  | 19.04556 | 29.87771 | O  | 0 | 0 | 0.00000 |
| HETATM | 450 | O  | 2.82274  | 2.29829  | 29.87772 | O  | 0 | 0 | 0.00000 |
| HETATM | 451 | O  | 2.82274  | 7.88074  | 29.87772 | O  | 0 | 0 | 0.00000 |
| HETATM | 452 | O  | 2.82272  | 13.46316 | 29.87772 | O  | 0 | 0 | 0.00000 |
| HETATM | 453 | O  | 7.65724  | 21.83678 | 29.87774 | O  | 0 | 0 | 0.00000 |
| HETATM | 454 | O  | 7.65725  | 5.08952  | 29.87773 | O  | 0 | 0 | 0.00000 |
| HETATM | 455 | O  | 7.65723  | 10.67194 | 29.87774 | O  | 0 | 0 | 0.00000 |
| HETATM | 456 | O  | 7.65722  | 16.25437 | 29.87774 | O  | 0 | 0 | 0.00000 |
| HETATM | 457 | O  | 12.49173 | 24.62799 | 29.87774 | O  | 0 | 0 | 0.00000 |
| HETATM | 458 | O  | 12.49173 | 7.88071  | 29.87774 | O  | 0 | 0 | 0.00000 |
| HETATM | 459 | O  | 12.49172 | 13.46315 | 29.87776 | O  | 0 | 0 | 0.00000 |
| HETATM | 460 | O  | 12.49171 | 19.04558 | 29.87775 | O  | 0 | 0 | 0.00000 |
| HETATM | 461 | O  | 17.32635 | 27.41920 | 29.87771 | O  | 0 | 0 | 0.00000 |
| HETATM | 462 | O  | 17.32636 | 10.67192 | 29.87772 | O  | 0 | 0 | 0.00000 |
| HETATM | 463 | O  | 17.32635 | 16.25436 | 29.87774 | O  | 0 | 0 | 0.00000 |
| HETATM | 464 | O  | 17.32634 | 21.83680 | 29.87773 | O  | 0 | 0 | 0.00000 |

UNIT ENERGY kcal

ENERGY -58963.177135

END

XTLGRF 200

DESCRP TS

REMARK Pt111\_0.25ML\_8x8x7\_30.0\_vac hcp-displacement

FIXATOMS 1 128

CRYSTX 22.32968 22.32968 43.67409 90.00000 90.00000 60.00000

FORMAT ATOM (a6,1x,i5,1x,a5,1x,a3,1x,a1,1x,a5,3f10.5,1x,a5,i3,i2,1x,f8.5)

|        |    |    |          |          |          |    |   |   |         |
|--------|----|----|----------|----------|----------|----|---|---|---------|
| HETATM | 1  | Pt | 2.01698  | 17.64996 | 14.96615 | Pt | 0 | 0 | 0.00000 |
| HETATM | 2  | Pt | 2.01698  | 23.23238 | 14.96615 | Pt | 0 | 0 | 0.00000 |
| HETATM | 3  | Pt | 2.01698  | 6.48512  | 14.96615 | Pt | 0 | 0 | 0.00000 |
| HETATM | 4  | Pt | 2.01698  | 12.06754 | 14.96615 | Pt | 0 | 0 | 0.00000 |
| HETATM | 5  | Pt | 6.85150  | 20.44117 | 14.96615 | Pt | 0 | 0 | 0.00000 |
| HETATM | 6  | Pt | 6.85150  | 26.02359 | 14.96615 | Pt | 0 | 0 | 0.00000 |
| HETATM | 7  | Pt | 6.85150  | 9.27633  | 14.96615 | Pt | 0 | 0 | 0.00000 |
| HETATM | 8  | Pt | 6.85150  | 14.85875 | 14.96615 | Pt | 0 | 0 | 0.00000 |
| HETATM | 9  | Pt | 11.68602 | 23.23238 | 14.96615 | Pt | 0 | 0 | 0.00000 |
| HETATM | 10 | Pt | 11.68602 | 28.81480 | 14.96615 | Pt | 0 | 0 | 0.00000 |
| HETATM | 11 | Pt | 11.68602 | 12.06754 | 14.96615 | Pt | 0 | 0 | 0.00000 |
| HETATM | 12 | Pt | 11.68602 | 17.64996 | 14.96615 | Pt | 0 | 0 | 0.00000 |
| HETATM | 13 | Pt | 16.52053 | 26.02359 | 14.96615 | Pt | 0 | 0 | 0.00000 |
| HETATM | 14 | Pt | 16.52053 | 31.60601 | 14.96615 | Pt | 0 | 0 | 0.00000 |
| HETATM | 15 | Pt | 16.52053 | 14.85875 | 14.96615 | Pt | 0 | 0 | 0.00000 |
| HETATM | 16 | Pt | 16.52053 | 20.44117 | 14.96615 | Pt | 0 | 0 | 0.00000 |
| HETATM | 17 | Pt | 2.01698  | 20.44117 | 14.96615 | Pt | 0 | 0 | 0.00000 |
| HETATM | 18 | Pt | 2.01698  | 3.69391  | 14.96615 | Pt | 0 | 0 | 0.00000 |
| HETATM | 19 | Pt | 2.01698  | 9.27633  | 14.96615 | Pt | 0 | 0 | 0.00000 |
| HETATM | 20 | Pt | 2.01698  | 14.85875 | 14.96615 | Pt | 0 | 0 | 0.00000 |
| HETATM | 21 | Pt | 6.85150  | 23.23238 | 14.96615 | Pt | 0 | 0 | 0.00000 |
| HETATM | 22 | Pt | 6.85150  | 6.48512  | 14.96615 | Pt | 0 | 0 | 0.00000 |
| HETATM | 23 | Pt | 6.85150  | 12.06754 | 14.96615 | Pt | 0 | 0 | 0.00000 |
| HETATM | 24 | Pt | 6.85150  | 17.64996 | 14.96615 | Pt | 0 | 0 | 0.00000 |



|        |    |    |          |          |          |    |   |   |         |
|--------|----|----|----------|----------|----------|----|---|---|---------|
| HETATM | 25 | Pt | 11.68602 | 26.02359 | 14.96615 | Pt | 0 | 0 | 0.00000 |
| HETATM | 26 | Pt | 11.68602 | 9.27633  | 14.96615 | Pt | 0 | 0 | 0.00000 |
| HETATM | 27 | Pt | 11.68602 | 14.85875 | 14.96615 | Pt | 0 | 0 | 0.00000 |
| HETATM | 28 | Pt | 11.68602 | 20.44117 | 14.96615 | Pt | 0 | 0 | 0.00000 |
| HETATM | 29 | Pt | 16.52053 | 28.81480 | 14.96615 | Pt | 0 | 0 | 0.00000 |
| HETATM | 30 | Pt | 16.52053 | 12.06754 | 14.96615 | Pt | 0 | 0 | 0.00000 |
| HETATM | 31 | Pt | 16.52053 | 17.64996 | 14.96615 | Pt | 0 | 0 | 0.00000 |
| HETATM | 32 | Pt | 16.52053 | 23.23238 | 14.96615 | Pt | 0 | 0 | 0.00000 |
| HETATM | 33 | Pt | 4.43424  | 19.04557 | 14.96615 | Pt | 0 | 0 | 0.00000 |
| HETATM | 34 | Pt | 4.43424  | 24.62799 | 14.96615 | Pt | 0 | 0 | 0.00000 |
| HETATM | 35 | Pt | 4.43424  | 7.88073  | 14.96615 | Pt | 0 | 0 | 0.00000 |
| HETATM | 36 | Pt | 4.43424  | 13.46315 | 14.96615 | Pt | 0 | 0 | 0.00000 |
| HETATM | 37 | Pt | 9.26876  | 21.83678 | 14.96615 | Pt | 0 | 0 | 0.00000 |
| HETATM | 38 | Pt | 9.26876  | 27.41920 | 14.96615 | Pt | 0 | 0 | 0.00000 |
| HETATM | 39 | Pt | 9.26876  | 10.67194 | 14.96615 | Pt | 0 | 0 | 0.00000 |
| HETATM | 40 | Pt | 9.26876  | 16.25436 | 14.96615 | Pt | 0 | 0 | 0.00000 |
| HETATM | 41 | Pt | 14.10328 | 24.62799 | 14.96615 | Pt | 0 | 0 | 0.00000 |
| HETATM | 42 | Pt | 14.10328 | 30.21041 | 14.96615 | Pt | 0 | 0 | 0.00000 |
| HETATM | 43 | Pt | 14.10328 | 13.46315 | 14.96615 | Pt | 0 | 0 | 0.00000 |
| HETATM | 44 | Pt | 14.10328 | 19.04557 | 14.96615 | Pt | 0 | 0 | 0.00000 |
| HETATM | 45 | Pt | 18.93779 | 27.41920 | 14.96615 | Pt | 0 | 0 | 0.00000 |
| HETATM | 46 | Pt | 18.93779 | 33.00162 | 14.96615 | Pt | 0 | 0 | 0.00000 |
| HETATM | 47 | Pt | 18.93779 | 16.25436 | 14.96615 | Pt | 0 | 0 | 0.00000 |
| HETATM | 48 | Pt | 18.93779 | 21.83678 | 14.96615 | Pt | 0 | 0 | 0.00000 |
| HETATM | 49 | Pt | 4.43424  | 21.83678 | 14.96615 | Pt | 0 | 0 | 0.00000 |
| HETATM | 50 | Pt | 4.43424  | 5.08952  | 14.96615 | Pt | 0 | 0 | 0.00000 |
| HETATM | 51 | Pt | 4.43424  | 10.67194 | 14.96615 | Pt | 0 | 0 | 0.00000 |
| HETATM | 52 | Pt | 4.43424  | 16.25436 | 14.96615 | Pt | 0 | 0 | 0.00000 |
| HETATM | 53 | Pt | 9.26876  | 24.62799 | 14.96615 | Pt | 0 | 0 | 0.00000 |
| HETATM | 54 | Pt | 9.26876  | 7.88073  | 14.96615 | Pt | 0 | 0 | 0.00000 |
| HETATM | 55 | Pt | 9.26876  | 13.46315 | 14.96615 | Pt | 0 | 0 | 0.00000 |
| HETATM | 56 | Pt | 9.26876  | 19.04557 | 14.96615 | Pt | 0 | 0 | 0.00000 |
| HETATM | 57 | Pt | 14.10328 | 27.41920 | 14.96615 | Pt | 0 | 0 | 0.00000 |
| HETATM | 58 | Pt | 14.10328 | 10.67194 | 14.96615 | Pt | 0 | 0 | 0.00000 |
| HETATM | 59 | Pt | 14.10328 | 16.25436 | 14.96615 | Pt | 0 | 0 | 0.00000 |
| HETATM | 60 | Pt | 14.10328 | 21.83678 | 14.96615 | Pt | 0 | 0 | 0.00000 |
| HETATM | 61 | Pt | 18.93779 | 30.21041 | 14.96615 | Pt | 0 | 0 | 0.00000 |
| HETATM | 62 | Pt | 18.93779 | 13.46315 | 14.96615 | Pt | 0 | 0 | 0.00000 |
| HETATM | 63 | Pt | 18.93779 | 19.04557 | 14.96615 | Pt | 0 | 0 | 0.00000 |
| HETATM | 64 | Pt | 18.93779 | 24.62799 | 14.96615 | Pt | 0 | 0 | 0.00000 |
| HETATM | 65 | Pt | 2.82273  | 19.04557 | 17.24517 | Pt | 0 | 0 | 0.00000 |
| HETATM | 66 | Pt | 2.82273  | 2.29831  | 17.24517 | Pt | 0 | 0 | 0.00000 |
| HETATM | 67 | Pt | 2.82273  | 7.88073  | 17.24517 | Pt | 0 | 0 | 0.00000 |
| HETATM | 68 | Pt | 2.82273  | 13.46315 | 17.24517 | Pt | 0 | 0 | 0.00000 |
| HETATM | 69 | Pt | 7.65725  | 21.83678 | 17.24517 | Pt | 0 | 0 | 0.00000 |
| HETATM | 70 | Pt | 7.65725  | 5.08952  | 17.24517 | Pt | 0 | 0 | 0.00000 |
| HETATM | 71 | Pt | 7.65725  | 10.67194 | 17.24517 | Pt | 0 | 0 | 0.00000 |
| HETATM | 72 | Pt | 7.65725  | 16.25436 | 17.24517 | Pt | 0 | 0 | 0.00000 |
| HETATM | 73 | Pt | 12.49177 | 24.62799 | 17.24517 | Pt | 0 | 0 | 0.00000 |
| HETATM | 74 | Pt | 12.49177 | 7.88073  | 17.24517 | Pt | 0 | 0 | 0.00000 |
| HETATM | 75 | Pt | 12.49177 | 13.46315 | 17.24517 | Pt | 0 | 0 | 0.00000 |
| HETATM | 76 | Pt | 12.49177 | 19.04557 | 17.24517 | Pt | 0 | 0 | 0.00000 |
| HETATM | 77 | Pt | 17.32628 | 27.41920 | 17.24517 | Pt | 0 | 0 | 0.00000 |
| HETATM | 78 | Pt | 17.32628 | 10.67194 | 17.24517 | Pt | 0 | 0 | 0.00000 |
| HETATM | 79 | Pt | 17.32628 | 16.25436 | 17.24517 | Pt | 0 | 0 | 0.00000 |
| HETATM | 80 | Pt | 17.32628 | 21.83678 | 17.24517 | Pt | 0 | 0 | 0.00000 |
| HETATM | 81 | Pt | 2.82273  | 21.83678 | 17.24517 | Pt | 0 | 0 | 0.00000 |
| HETATM | 82 | Pt | 2.82273  | 5.08952  | 17.24517 | Pt | 0 | 0 | 0.00000 |
| HETATM | 83 | Pt | 2.82273  | 10.67194 | 17.24517 | Pt | 0 | 0 | 0.00000 |
| HETATM | 84 | Pt | 2.82273  | 16.25436 | 17.24517 | Pt | 0 | 0 | 0.00000 |
| HETATM | 85 | Pt | 7.65725  | 24.62799 | 17.24517 | Pt | 0 | 0 | 0.00000 |
| HETATM | 86 | Pt | 7.65725  | 7.88073  | 17.24517 | Pt | 0 | 0 | 0.00000 |
| HETATM | 87 | Pt | 7.65725  | 13.46315 | 17.24517 | Pt | 0 | 0 | 0.00000 |

|        |     |    |          |          |          |    |   |   |         |
|--------|-----|----|----------|----------|----------|----|---|---|---------|
| HETATM | 88  | Pt | 7.65725  | 19.04557 | 17.24517 | Pt | 0 | 0 | 0.00000 |
| HETATM | 89  | Pt | 12.49177 | 27.41920 | 17.24517 | Pt | 0 | 0 | 0.00000 |
| HETATM | 90  | Pt | 12.49177 | 10.67194 | 17.24517 | Pt | 0 | 0 | 0.00000 |
| HETATM | 91  | Pt | 12.49177 | 16.25436 | 17.24517 | Pt | 0 | 0 | 0.00000 |
| HETATM | 92  | Pt | 12.49177 | 21.83678 | 17.24517 | Pt | 0 | 0 | 0.00000 |
| HETATM | 93  | Pt | 17.32628 | 30.21041 | 17.24517 | Pt | 0 | 0 | 0.00000 |
| HETATM | 94  | Pt | 17.32628 | 13.46315 | 17.24517 | Pt | 0 | 0 | 0.00000 |
| HETATM | 95  | Pt | 17.32628 | 19.04557 | 17.24517 | Pt | 0 | 0 | 0.00000 |
| HETATM | 96  | Pt | 17.32628 | 24.62799 | 17.24517 | Pt | 0 | 0 | 0.00000 |
| HETATM | 97  | Pt | 5.23999  | 20.44117 | 17.24517 | Pt | 0 | 0 | 0.00000 |
| HETATM | 98  | Pt | 5.23999  | 3.69391  | 17.24517 | Pt | 0 | 0 | 0.00000 |
| HETATM | 99  | Pt | 5.23999  | 9.27633  | 17.24517 | Pt | 0 | 0 | 0.00000 |
| HETATM | 100 | Pt | 5.23999  | 14.85875 | 17.24517 | Pt | 0 | 0 | 0.00000 |
| HETATM | 101 | Pt | 10.07451 | 23.23238 | 17.24517 | Pt | 0 | 0 | 0.00000 |
| HETATM | 102 | Pt | 10.07451 | 6.48512  | 17.24517 | Pt | 0 | 0 | 0.00000 |
| HETATM | 103 | Pt | 10.07451 | 12.06754 | 17.24517 | Pt | 0 | 0 | 0.00000 |
| HETATM | 104 | Pt | 10.07451 | 17.64996 | 17.24517 | Pt | 0 | 0 | 0.00000 |
| HETATM | 105 | Pt | 14.90903 | 26.02359 | 17.24517 | Pt | 0 | 0 | 0.00000 |
| HETATM | 106 | Pt | 14.90903 | 9.27633  | 17.24517 | Pt | 0 | 0 | 0.00000 |
| HETATM | 107 | Pt | 14.90903 | 14.85875 | 17.24517 | Pt | 0 | 0 | 0.00000 |
| HETATM | 108 | Pt | 14.90903 | 20.44117 | 17.24517 | Pt | 0 | 0 | 0.00000 |
| HETATM | 109 | Pt | 0.40547  | 17.64996 | 17.24517 | Pt | 0 | 0 | 0.00000 |
| HETATM | 110 | Pt | 0.40547  | 0.90270  | 17.24517 | Pt | 0 | 0 | 0.00000 |
| HETATM | 111 | Pt | 0.40547  | 6.48512  | 17.24517 | Pt | 0 | 0 | 0.00000 |
| HETATM | 112 | Pt | 0.40547  | 12.06754 | 17.24517 | Pt | 0 | 0 | 0.00000 |
| HETATM | 113 | Pt | 5.23999  | 23.23238 | 17.24517 | Pt | 0 | 0 | 0.00000 |
| HETATM | 114 | Pt | 5.23999  | 6.48512  | 17.24517 | Pt | 0 | 0 | 0.00000 |
| HETATM | 115 | Pt | 5.23999  | 12.06754 | 17.24517 | Pt | 0 | 0 | 0.00000 |
| HETATM | 116 | Pt | 5.23999  | 17.64996 | 17.24517 | Pt | 0 | 0 | 0.00000 |
| HETATM | 117 | Pt | 10.07451 | 26.02359 | 17.24517 | Pt | 0 | 0 | 0.00000 |
| HETATM | 118 | Pt | 10.07451 | 9.27633  | 17.24517 | Pt | 0 | 0 | 0.00000 |
| HETATM | 119 | Pt | 10.07451 | 14.85875 | 17.24517 | Pt | 0 | 0 | 0.00000 |
| HETATM | 120 | Pt | 10.07451 | 20.44117 | 17.24517 | Pt | 0 | 0 | 0.00000 |
| HETATM | 121 | Pt | 14.90903 | 28.81480 | 17.24517 | Pt | 0 | 0 | 0.00000 |
| HETATM | 122 | Pt | 14.90903 | 12.06754 | 17.24517 | Pt | 0 | 0 | 0.00000 |
| HETATM | 123 | Pt | 14.90903 | 17.64996 | 17.24517 | Pt | 0 | 0 | 0.00000 |
| HETATM | 124 | Pt | 14.90903 | 23.23238 | 17.24517 | Pt | 0 | 0 | 0.00000 |
| HETATM | 125 | Pt | 0.40547  | 20.44117 | 17.24517 | Pt | 0 | 0 | 0.00000 |
| HETATM | 126 | Pt | 0.40547  | 3.69391  | 17.24517 | Pt | 0 | 0 | 0.00000 |
| HETATM | 127 | Pt | 0.40547  | 9.27633  | 17.24517 | Pt | 0 | 0 | 0.00000 |
| HETATM | 128 | Pt | 0.40547  | 14.85875 | 17.24517 | Pt | 0 | 0 | 0.00000 |
| HETATM | 129 | Pt | 3.62817  | 20.44062 | 19.52395 | Pt | 0 | 0 | 0.00000 |
| HETATM | 130 | Pt | 3.62847  | 3.69373  | 19.52304 | Pt | 0 | 0 | 0.00000 |
| HETATM | 131 | Pt | 3.62795  | 9.27628  | 19.52398 | Pt | 0 | 0 | 0.00000 |
| HETATM | 132 | Pt | 3.62821  | 14.85841 | 19.52393 | Pt | 0 | 0 | 0.00000 |
| HETATM | 133 | Pt | 8.46285  | 23.23228 | 19.52304 | Pt | 0 | 0 | 0.00000 |
| HETATM | 134 | Pt | 8.46284  | 6.48484  | 19.52340 | Pt | 0 | 0 | 0.00000 |
| HETATM | 135 | Pt | 8.46264  | 12.06723 | 19.52392 | Pt | 0 | 0 | 0.00000 |
| HETATM | 136 | Pt | 8.46248  | 17.64972 | 19.52377 | Pt | 0 | 0 | 0.00000 |
| HETATM | 137 | Pt | 13.29773 | 26.02310 | 19.52398 | Pt | 0 | 0 | 0.00000 |
| HETATM | 138 | Pt | 13.29744 | 9.27587  | 19.52392 | Pt | 0 | 0 | 0.00000 |
| HETATM | 139 | Pt | 13.29744 | 14.85862 | 19.52279 | Pt | 0 | 0 | 0.00000 |
| HETATM | 140 | Pt | 13.29760 | 20.44071 | 19.52419 | Pt | 0 | 0 | 0.00000 |
| HETATM | 141 | Pt | 18.13188 | 28.81440 | 19.52392 | Pt | 0 | 0 | 0.00000 |
| HETATM | 142 | Pt | 18.13209 | 12.06697 | 19.52377 | Pt | 0 | 0 | 0.00000 |
| HETATM | 143 | Pt | 18.13159 | 17.64981 | 19.52419 | Pt | 0 | 0 | 0.00000 |
| HETATM | 144 | Pt | 18.13180 | 23.23197 | 19.52403 | Pt | 0 | 0 | 0.00000 |
| HETATM | 145 | Pt | 3.62826  | 23.23261 | 19.52355 | Pt | 0 | 0 | 0.00000 |
| HETATM | 146 | Pt | 3.62803  | 6.48583  | 19.52366 | Pt | 0 | 0 | 0.00000 |
| HETATM | 147 | Pt | 3.62812  | 12.06804 | 19.52392 | Pt | 0 | 0 | 0.00000 |
| HETATM | 148 | Pt | 3.62823  | 17.65018 | 19.52399 | Pt | 0 | 0 | 0.00000 |
| HETATM | 149 | Pt | 8.46304  | 26.02411 | 19.52314 | Pt | 0 | 0 | 0.00000 |
| HETATM | 150 | Pt | 8.46252  | 9.27654  | 19.52351 | Pt | 0 | 0 | 0.00000 |

|        |     |    |          |          |          |    |   |   |         |
|--------|-----|----|----------|----------|----------|----|---|---|---------|
| HETATM | 151 | Pt | 8.46263  | 14.85916 | 19.52407 | Pt | 0 | 0 | 0.00000 |
| HETATM | 152 | Pt | 8.46264  | 20.44159 | 19.52343 | Pt | 0 | 0 | 0.00000 |
| HETATM | 153 | Pt | 13.29768 | 28.81518 | 19.52402 | Pt | 0 | 0 | 0.00000 |
| HETATM | 154 | Pt | 13.29748 | 12.06759 | 19.52277 | Pt | 0 | 0 | 0.00000 |
| HETATM | 155 | Pt | 13.29733 | 17.65052 | 19.52389 | Pt | 0 | 0 | 0.00000 |
| HETATM | 156 | Pt | 13.29774 | 23.23241 | 19.52424 | Pt | 0 | 0 | 0.00000 |
| HETATM | 157 | Pt | 18.13174 | 31.60624 | 19.52420 | Pt | 0 | 0 | 0.00000 |
| HETATM | 158 | Pt | 18.13224 | 14.85911 | 19.52336 | Pt | 0 | 0 | 0.00000 |
| HETATM | 159 | Pt | 18.13154 | 20.44149 | 19.52452 | Pt | 0 | 0 | 0.00000 |
| HETATM | 160 | Pt | 18.13190 | 26.02387 | 19.52387 | Pt | 0 | 0 | 0.00000 |
| HETATM | 161 | Pt | 6.04605  | 21.83670 | 19.52355 | Pt | 0 | 0 | 0.00000 |
| HETATM | 162 | Pt | 6.04617  | 5.08981  | 19.52314 | Pt | 0 | 0 | 0.00000 |
| HETATM | 163 | Pt | 6.04599  | 10.67226 | 19.52402 | Pt | 0 | 0 | 0.00000 |
| HETATM | 164 | Pt | 6.04609  | 16.25421 | 19.52420 | Pt | 0 | 0 | 0.00000 |
| HETATM | 165 | Pt | 10.88110 | 24.62794 | 19.52366 | Pt | 0 | 0 | 0.00000 |
| HETATM | 166 | Pt | 10.88069 | 7.88041  | 19.52351 | Pt | 0 | 0 | 0.00000 |
| HETATM | 167 | Pt | 10.88032 | 13.46314 | 19.52277 | Pt | 0 | 0 | 0.00000 |
| HETATM | 168 | Pt | 10.88047 | 19.04593 | 19.52336 | Pt | 0 | 0 | 0.00000 |
| HETATM | 169 | Pt | 15.71539 | 27.41912 | 19.52392 | Pt | 0 | 0 | 0.00000 |
| HETATM | 170 | Pt | 15.71532 | 10.67182 | 19.52407 | Pt | 0 | 0 | 0.00000 |
| HETATM | 171 | Pt | 15.71536 | 16.25447 | 19.52389 | Pt | 0 | 0 | 0.00000 |
| HETATM | 172 | Pt | 15.71530 | 21.83651 | 19.52452 | Pt | 0 | 0 | 0.00000 |
| HETATM | 173 | Pt | 1.21153  | 19.04545 | 19.52399 | Pt | 0 | 0 | 0.00000 |
| HETATM | 174 | Pt | 1.21177  | 2.29821  | 19.52343 | Pt | 0 | 0 | 0.00000 |
| HETATM | 175 | Pt | 1.21113  | 7.88093  | 19.52424 | Pt | 0 | 0 | 0.00000 |
| HETATM | 176 | Pt | 1.21154  | 13.46316 | 19.52387 | Pt | 0 | 0 | 0.00000 |
| HETATM | 177 | Pt | 6.04583  | 24.62813 | 19.52459 | Pt | 0 | 0 | 0.00000 |
| HETATM | 178 | Pt | 6.04545  | 7.88101  | 19.52521 | Pt | 0 | 0 | 0.00000 |
| HETATM | 179 | Pt | 6.04570  | 13.46326 | 19.52577 | Pt | 0 | 0 | 0.00000 |
| HETATM | 180 | Pt | 6.04560  | 19.04538 | 19.52556 | Pt | 0 | 0 | 0.00000 |
| HETATM | 181 | Pt | 10.88066 | 27.41908 | 19.52521 | Pt | 0 | 0 | 0.00000 |
| HETATM | 182 | Pt | 10.87995 | 10.67140 | 19.52448 | Pt | 0 | 0 | 0.00000 |
| HETATM | 183 | Pt | 10.87983 | 16.25486 | 19.52460 | Pt | 0 | 0 | 0.00000 |
| HETATM | 184 | Pt | 10.88046 | 21.83696 | 19.52497 | Pt | 0 | 0 | 0.00000 |
| HETATM | 185 | Pt | 15.71490 | 30.21042 | 19.52577 | Pt | 0 | 0 | 0.00000 |
| HETATM | 186 | Pt | 15.71543 | 13.46303 | 19.52460 | Pt | 0 | 0 | 0.00000 |
| HETATM | 187 | Pt | 15.71476 | 19.04554 | 19.52620 | Pt | 0 | 0 | 0.00000 |
| HETATM | 188 | Pt | 15.71498 | 24.62780 | 19.52559 | Pt | 0 | 0 | 0.00000 |
| HETATM | 189 | Pt | 1.21114  | 21.83656 | 19.52556 | Pt | 0 | 0 | 0.00000 |
| HETATM | 190 | Pt | 1.21129  | 5.08979  | 19.52497 | Pt | 0 | 0 | 0.00000 |
| HETATM | 191 | Pt | 1.21096  | 10.67202 | 19.52559 | Pt | 0 | 0 | 0.00000 |
| HETATM | 192 | Pt | 1.21120  | 16.25432 | 19.52544 | Pt | 0 | 0 | 0.00000 |
| HETATM | 193 | Pt | 2.01728  | 17.65048 | 21.80491 | Pt | 0 | 0 | 0.00000 |
| HETATM | 194 | Pt | 2.01730  | 23.23294 | 21.80435 | Pt | 0 | 0 | 0.00000 |
| HETATM | 195 | Pt | 2.01693  | 6.48626  | 21.80476 | Pt | 0 | 0 | 0.00000 |
| HETATM | 196 | Pt | 2.01708  | 12.06832 | 21.80490 | Pt | 0 | 0 | 0.00000 |
| HETATM | 197 | Pt | 6.85182  | 20.44173 | 21.80435 | Pt | 0 | 0 | 0.00000 |
| HETATM | 198 | Pt | 6.85221  | 26.02484 | 21.80306 | Pt | 0 | 0 | 0.00000 |
| HETATM | 199 | Pt | 6.85156  | 9.27762  | 21.80449 | Pt | 0 | 0 | 0.00000 |
| HETATM | 200 | Pt | 6.85204  | 14.85933 | 21.80593 | Pt | 0 | 0 | 0.00000 |
| HETATM | 201 | Pt | 11.68703 | 23.23291 | 21.80476 | Pt | 0 | 0 | 0.00000 |
| HETATM | 202 | Pt | 11.68710 | 28.81549 | 21.80449 | Pt | 0 | 0 | 0.00000 |
| HETATM | 203 | Pt | 11.68592 | 12.06738 | 21.80115 | Pt | 0 | 0 | 0.00000 |
| HETATM | 204 | Pt | 11.68573 | 17.65160 | 21.80364 | Pt | 0 | 0 | 0.00000 |
| HETATM | 205 | Pt | 16.52115 | 26.02407 | 21.80490 | Pt | 0 | 0 | 0.00000 |
| HETATM | 206 | Pt | 16.52076 | 31.60677 | 21.80593 | Pt | 0 | 0 | 0.00000 |
| HETATM | 207 | Pt | 16.52209 | 14.85933 | 21.80364 | Pt | 0 | 0 | 0.00000 |
| HETATM | 208 | Pt | 16.52065 | 20.44138 | 21.80695 | Pt | 0 | 0 | 0.00000 |
| HETATM | 209 | Pt | 2.01714  | 20.44013 | 21.80510 | Pt | 0 | 0 | 0.00000 |
| HETATM | 210 | Pt | 2.01812  | 3.69331  | 21.80291 | Pt | 0 | 0 | 0.00000 |
| HETATM | 211 | Pt | 2.01676  | 9.27578  | 21.80519 | Pt | 0 | 0 | 0.00000 |
| HETATM | 212 | Pt | 2.01726  | 14.85791 | 21.80482 | Pt | 0 | 0 | 0.00000 |
| HETATM | 213 | Pt | 6.85190  | 23.23204 | 21.80321 | Pt | 0 | 0 | 0.00000 |

|        |     |    |          |          |          |    |   |   |         |
|--------|-----|----|----------|----------|----------|----|---|---|---------|
| HETATM | 214 | Pt | 6.85195  | 6.48490  | 21.80365 | Pt | 0 | 0 | 0.00000 |
| HETATM | 215 | Pt | 6.85206  | 12.06742 | 21.80559 | Pt | 0 | 0 | 0.00000 |
| HETATM | 216 | Pt | 6.85172  | 17.64873 | 21.80541 | Pt | 0 | 0 | 0.00000 |
| HETATM | 217 | Pt | 11.68714 | 26.02276 | 21.80464 | Pt | 0 | 0 | 0.00000 |
| HETATM | 218 | Pt | 11.68617 | 9.27493  | 21.80385 | Pt | 0 | 0 | 0.00000 |
| HETATM | 219 | Pt | 11.68567 | 14.85894 | 21.80128 | Pt | 0 | 0 | 0.00000 |
| HETATM | 220 | Pt | 11.68660 | 20.44081 | 21.80394 | Pt | 0 | 0 | 0.00000 |
| HETATM | 221 | Pt | 16.52114 | 28.81394 | 21.80502 | Pt | 0 | 0 | 0.00000 |
| HETATM | 222 | Pt | 16.52170 | 12.06654 | 21.80470 | Pt | 0 | 0 | 0.00000 |
| HETATM | 223 | Pt | 16.52055 | 17.64920 | 21.80624 | Pt | 0 | 0 | 0.00000 |
| HETATM | 224 | Pt | 16.52105 | 23.23125 | 21.80536 | Pt | 0 | 0 | 0.00000 |
| HETATM | 225 | Pt | 4.43326  | 19.04519 | 21.80510 | Pt | 0 | 0 | 0.00000 |
| HETATM | 226 | Pt | 4.43374  | 24.62816 | 21.80321 | Pt | 0 | 0 | 0.00000 |
| HETATM | 227 | Pt | 4.43295  | 7.88129  | 21.80464 | Pt | 0 | 0 | 0.00000 |
| HETATM | 228 | Pt | 4.43319  | 13.46324 | 21.80502 | Pt | 0 | 0 | 0.00000 |
| HETATM | 229 | Pt | 9.26766  | 21.83746 | 21.80291 | Pt | 0 | 0 | 0.00000 |
| HETATM | 230 | Pt | 9.26833  | 27.41948 | 21.80365 | Pt | 0 | 0 | 0.00000 |
| HETATM | 231 | Pt | 9.26746  | 10.67137 | 21.80385 | Pt | 0 | 0 | 0.00000 |
| HETATM | 232 | Pt | 9.26730  | 16.25487 | 21.80470 | Pt | 0 | 0 | 0.00000 |
| HETATM | 233 | Pt | 14.10290 | 24.62751 | 21.80519 | Pt | 0 | 0 | 0.00000 |
| HETATM | 234 | Pt | 14.10288 | 30.21084 | 21.80559 | Pt | 0 | 0 | 0.00000 |
| HETATM | 235 | Pt | 14.10360 | 13.46294 | 21.80128 | Pt | 0 | 0 | 0.00000 |
| HETATM | 236 | Pt | 14.10260 | 19.04521 | 21.80624 | Pt | 0 | 0 | 0.00000 |
| HETATM | 237 | Pt | 18.93692 | 27.41901 | 21.80482 | Pt | 0 | 0 | 0.00000 |
| HETATM | 238 | Pt | 18.93661 | 33.00120 | 21.80541 | Pt | 0 | 0 | 0.00000 |
| HETATM | 239 | Pt | 18.93719 | 16.25468 | 21.80394 | Pt | 0 | 0 | 0.00000 |
| HETATM | 240 | Pt | 18.93654 | 21.83666 | 21.80536 | Pt | 0 | 0 | 0.00000 |
| HETATM | 241 | Pt | 4.43410  | 21.83655 | 21.79850 | Pt | 0 | 0 | 0.00000 |
| HETATM | 242 | Pt | 4.43447  | 5.09008  | 21.79750 | Pt | 0 | 0 | 0.00000 |
| HETATM | 243 | Pt | 4.43396  | 10.67243 | 21.79905 | Pt | 0 | 0 | 0.00000 |
| HETATM | 244 | Pt | 4.43414  | 16.25410 | 21.79920 | Pt | 0 | 0 | 0.00000 |
| HETATM | 245 | Pt | 9.26913  | 24.62847 | 21.79749 | Pt | 0 | 0 | 0.00000 |
| HETATM | 246 | Pt | 9.26887  | 7.88094  | 21.79821 | Pt | 0 | 0 | 0.00000 |
| HETATM | 247 | Pt | 9.26874  | 13.46332 | 21.79889 | Pt | 0 | 0 | 0.00000 |
| HETATM | 248 | Pt | 9.26848  | 19.04549 | 21.79823 | Pt | 0 | 0 | 0.00000 |
| HETATM | 249 | Pt | 14.10384 | 27.41921 | 21.79906 | Pt | 0 | 0 | 0.00000 |
| HETATM | 250 | Pt | 14.10344 | 10.67202 | 21.79889 | Pt | 0 | 0 | 0.00000 |
| HETATM | 251 | Pt | 14.10337 | 16.25453 | 21.79829 | Pt | 0 | 0 | 0.00000 |
| HETATM | 252 | Pt | 14.10378 | 21.83584 | 21.80034 | Pt | 0 | 0 | 0.00000 |
| HETATM | 253 | Pt | 18.93760 | 30.21020 | 21.79920 | Pt | 0 | 0 | 0.00000 |
| HETATM | 254 | Pt | 18.93786 | 13.46287 | 21.79823 | Pt | 0 | 0 | 0.00000 |
| HETATM | 255 | Pt | 18.93673 | 19.04554 | 21.80034 | Pt | 0 | 0 | 0.00000 |
| HETATM | 256 | Pt | 18.93769 | 24.62782 | 21.79896 | Pt | 0 | 0 | 0.00000 |
| HETATM | 257 | Pt | 2.82242  | 19.04503 | 24.09209 | Pt | 0 | 0 | 0.00000 |
| HETATM | 258 | Pt | 2.82406  | 2.29825  | 24.08930 | Pt | 0 | 0 | 0.00000 |
| HETATM | 259 | Pt | 2.82218  | 7.88107  | 24.09197 | Pt | 0 | 0 | 0.00000 |
| HETATM | 260 | Pt | 2.82240  | 13.46294 | 24.09186 | Pt | 0 | 0 | 0.00000 |
| HETATM | 261 | Pt | 7.65654  | 21.83790 | 24.08930 | Pt | 0 | 0 | 0.00000 |
| HETATM | 262 | Pt | 7.65761  | 5.09015  | 24.08951 | Pt | 0 | 0 | 0.00000 |
| HETATM | 263 | Pt | 7.65720  | 10.67308 | 24.09188 | Pt | 0 | 0 | 0.00000 |
| HETATM | 264 | Pt | 7.65744  | 16.25296 | 24.09420 | Pt | 0 | 0 | 0.00000 |
| HETATM | 265 | Pt | 12.49234 | 24.62768 | 24.09198 | Pt | 0 | 0 | 0.00000 |
| HETATM | 266 | Pt | 12.49278 | 7.88126  | 24.09188 | Pt | 0 | 0 | 0.00000 |
| HETATM | 267 | Pt | 12.49207 | 13.46366 | 24.07952 | Pt | 0 | 0 | 0.00000 |
| HETATM | 268 | Pt | 12.49160 | 19.04622 | 24.09103 | Pt | 0 | 0 | 0.00000 |
| HETATM | 269 | Pt | 17.32627 | 27.41881 | 24.09186 | Pt | 0 | 0 | 0.00000 |
| HETATM | 270 | Pt | 17.32498 | 10.67140 | 24.09420 | Pt | 0 | 0 | 0.00000 |
| HETATM | 271 | Pt | 17.32693 | 16.25453 | 24.09103 | Pt | 0 | 0 | 0.00000 |
| HETATM | 272 | Pt | 17.32588 | 21.83608 | 24.09318 | Pt | 0 | 0 | 0.00000 |
| HETATM | 273 | Pt | 2.82848  | 21.83653 | 24.07905 | Pt | 0 | 0 | 0.00000 |
| HETATM | 274 | Pt | 2.82989  | 5.08999  | 24.07726 | Pt | 0 | 0 | 0.00000 |
| HETATM | 275 | Pt | 2.82844  | 10.67206 | 24.07945 | Pt | 0 | 0 | 0.00000 |
| HETATM | 276 | Pt | 2.82869  | 16.25396 | 24.07938 | Pt | 0 | 0 | 0.00000 |

|        |     |    |          |          |          |    |   |   |         |
|--------|-----|----|----------|----------|----------|----|---|---|---------|
| HETATM | 277 | Pt | 7.66362  | 24.62896 | 24.07678 | Pt | 0 | 0 | 0.00000 |
| HETATM | 278 | Pt | 7.66361  | 7.88143  | 24.07748 | Pt | 0 | 0 | 0.00000 |
| HETATM | 279 | Pt | 7.66489  | 13.46383 | 24.08215 | Pt | 0 | 0 | 0.00000 |
| HETATM | 280 | Pt | 7.66358  | 19.04486 | 24.07878 | Pt | 0 | 0 | 0.00000 |
| HETATM | 281 | Pt | 12.49866 | 27.41953 | 24.07913 | Pt | 0 | 0 | 0.00000 |
| HETATM | 282 | Pt | 12.49607 | 10.67060 | 24.07637 | Pt | 0 | 0 | 0.00000 |
| HETATM | 283 | Pt | 12.49611 | 16.25597 | 24.07533 | Pt | 0 | 0 | 0.00000 |
| HETATM | 284 | Pt | 12.49838 | 21.83594 | 24.08009 | Pt | 0 | 0 | 0.00000 |
| HETATM | 285 | Pt | 17.33201 | 30.21015 | 24.08001 | Pt | 0 | 0 | 0.00000 |
| HETATM | 286 | Pt | 17.33123 | 13.46272 | 24.08003 | Pt | 0 | 0 | 0.00000 |
| HETATM | 287 | Pt | 17.33040 | 19.04456 | 24.08398 | Pt | 0 | 0 | 0.00000 |
| HETATM | 288 | Pt | 17.33228 | 24.62743 | 24.07954 | Pt | 0 | 0 | 0.00000 |
| HETATM | 289 | Pt | 5.23690  | 20.44603 | 24.07905 | Pt | 0 | 0 | 0.00000 |
| HETATM | 290 | Pt | 5.23764  | 3.69991  | 24.07678 | Pt | 0 | 0 | 0.00000 |
| HETATM | 291 | Pt | 5.23683  | 9.28246  | 24.07913 | Pt | 0 | 0 | 0.00000 |
| HETATM | 292 | Pt | 5.23691  | 14.86359 | 24.08001 | Pt | 0 | 0 | 0.00000 |
| HETATM | 293 | Pt | 10.07134 | 23.23883 | 24.07726 | Pt | 0 | 0 | 0.00000 |
| HETATM | 294 | Pt | 10.07195 | 6.49098  | 24.07748 | Pt | 0 | 0 | 0.00000 |
| HETATM | 295 | Pt | 10.07119 | 12.07061 | 24.07637 | Pt | 0 | 0 | 0.00000 |
| HETATM | 296 | Pt | 10.07167 | 17.65402 | 24.08003 | Pt | 0 | 0 | 0.00000 |
| HETATM | 297 | Pt | 14.90628 | 26.02860 | 24.07945 | Pt | 0 | 0 | 0.00000 |
| HETATM | 298 | Pt | 14.90580 | 9.28329  | 24.08216 | Pt | 0 | 0 | 0.00000 |
| HETATM | 299 | Pt | 14.90826 | 14.86331 | 24.07533 | Pt | 0 | 0 | 0.00000 |
| HETATM | 300 | Pt | 14.90610 | 20.44423 | 24.08398 | Pt | 0 | 0 | 0.00000 |
| HETATM | 301 | Pt | 0.40215  | 17.65492 | 24.07938 | Pt | 0 | 0 | 0.00000 |
| HETATM | 302 | Pt | 0.40170  | 0.90783  | 24.07879 | Pt | 0 | 0 | 0.00000 |
| HETATM | 303 | Pt | 0.40144  | 6.49043  | 24.08009 | Pt | 0 | 0 | 0.00000 |
| HETATM | 304 | Pt | 0.40199  | 12.07246 | 24.07955 | Pt | 0 | 0 | 0.00000 |
| HETATM | 305 | Pt | 5.23704  | 23.22728 | 24.07732 | Pt | 0 | 0 | 0.00000 |
| HETATM | 306 | Pt | 5.23726  | 6.48065  | 24.07792 | Pt | 0 | 0 | 0.00000 |
| HETATM | 307 | Pt | 5.23709  | 12.06289 | 24.07983 | Pt | 0 | 0 | 0.00000 |
| HETATM | 308 | Pt | 5.23707  | 17.64385 | 24.08001 | Pt | 0 | 0 | 0.00000 |
| HETATM | 309 | Pt | 10.07200 | 26.01898 | 24.07792 | Pt | 0 | 0 | 0.00000 |
| HETATM | 310 | Pt | 10.07211 | 9.27220  | 24.07968 | Pt | 0 | 0 | 0.00000 |
| HETATM | 311 | Pt | 10.07103 | 14.85575 | 24.07821 | Pt | 0 | 0 | 0.00000 |
| HETATM | 312 | Pt | 10.07020 | 20.43751 | 24.07512 | Pt | 0 | 0 | 0.00000 |
| HETATM | 313 | Pt | 14.90645 | 28.80997 | 24.07984 | Pt | 0 | 0 | 0.00000 |
| HETATM | 314 | Pt | 14.90816 | 12.06306 | 24.07822 | Pt | 0 | 0 | 0.00000 |
| HETATM | 315 | Pt | 14.90533 | 17.64357 | 24.08275 | Pt | 0 | 0 | 0.00000 |
| HETATM | 316 | Pt | 14.90612 | 23.22596 | 24.08023 | Pt | 0 | 0 | 0.00000 |
| HETATM | 317 | Pt | 0.40165  | 20.43559 | 24.08001 | Pt | 0 | 0 | 0.00000 |
| HETATM | 318 | Pt | 0.40445  | 3.68834  | 24.07512 | Pt | 0 | 0 | 0.00000 |
| HETATM | 319 | Pt | 0.40137  | 9.27060  | 24.08023 | Pt | 0 | 0 | 0.00000 |
| HETATM | 320 | Pt | 0.40219  | 14.85307 | 24.07926 | Pt | 0 | 0 | 0.00000 |
| HETATM | 321 | Pt | 3.62334  | 20.43227 | 26.38175 | Pt | 0 | 0 | 0.00000 |
| HETATM | 322 | Pt | 3.62612  | 3.68626  | 26.37948 | Pt | 0 | 0 | 0.00000 |
| HETATM | 323 | Pt | 3.62424  | 9.26888  | 26.38222 | Pt | 0 | 0 | 0.00000 |
| HETATM | 324 | Pt | 3.62396  | 14.85013 | 26.38224 | Pt | 0 | 0 | 0.00000 |
| HETATM | 325 | Pt | 8.45754  | 23.22653 | 26.37949 | Pt | 0 | 0 | 0.00000 |
| HETATM | 326 | Pt | 8.45835  | 6.47705  | 26.37903 | Pt | 0 | 0 | 0.00000 |
| HETATM | 327 | Pt | 8.46105  | 12.06203 | 26.38545 | Pt | 0 | 0 | 0.00000 |
| HETATM | 328 | Pt | 8.45971  | 17.64018 | 26.38178 | Pt | 0 | 0 | 0.00000 |
| HETATM | 329 | Pt | 13.29319 | 26.01619 | 26.38223 | Pt | 0 | 0 | 0.00000 |
| HETATM | 330 | Pt | 13.29372 | 9.27188  | 26.38546 | Pt | 0 | 0 | 0.00000 |
| HETATM | 331 | Pt | 13.29471 | 14.85388 | 26.36319 | Pt | 0 | 0 | 0.00000 |
| HETATM | 332 | Pt | 13.29183 | 20.43042 | 26.38694 | Pt | 0 | 0 | 0.00000 |
| HETATM | 333 | Pt | 18.12683 | 28.80658 | 26.38224 | Pt | 0 | 0 | 0.00000 |
| HETATM | 334 | Pt | 18.12519 | 12.05985 | 26.38178 | Pt | 0 | 0 | 0.00000 |
| HETATM | 335 | Pt | 18.12558 | 17.63965 | 26.38694 | Pt | 0 | 0 | 0.00000 |
| HETATM | 336 | Pt | 18.12676 | 23.22323 | 26.38276 | Pt | 0 | 0 | 0.00000 |
| HETATM | 337 | Pt | 3.62506  | 23.23984 | 26.38034 | Pt | 0 | 0 | 0.00000 |
| HETATM | 338 | Pt | 3.62510  | 6.49396  | 26.38102 | Pt | 0 | 0 | 0.00000 |
| HETATM | 339 | Pt | 3.62425  | 12.07535 | 26.38222 | Pt | 0 | 0 | 0.00000 |

|        |     |    |          |          |          |    |   |   |         |
|--------|-----|----|----------|----------|----------|----|---|---|---------|
| HETATM | 340 | Pt | 3.62408  | 17.65688 | 26.38259 | Pt | 0 | 0 | 0.00000 |
| HETATM | 341 | Pt | 8.45867  | 26.03258 | 26.37971 | Pt | 0 | 0 | 0.00000 |
| HETATM | 342 | Pt | 8.45931  | 9.28446  | 26.37837 | Pt | 0 | 0 | 0.00000 |
| HETATM | 343 | Pt | 8.46371  | 14.86428 | 26.39224 | Pt | 0 | 0 | 0.00000 |
| HETATM | 344 | Pt | 8.45529  | 20.45236 | 26.37755 | Pt | 0 | 0 | 0.00000 |
| HETATM | 345 | Pt | 13.29293 | 28.82464 | 26.38233 | Pt | 0 | 0 | 0.00000 |
| HETATM | 346 | Pt | 13.29004 | 12.07435 | 26.36206 | Pt | 0 | 0 | 0.00000 |
| HETATM | 347 | Pt | 13.29011 | 17.65634 | 26.38426 | Pt | 0 | 0 | 0.00000 |
| HETATM | 348 | Pt | 13.29251 | 23.23956 | 26.38321 | Pt | 0 | 0 | 0.00000 |
| HETATM | 349 | Pt | 18.12500 | 31.61453 | 26.38369 | Pt | 0 | 0 | 0.00000 |
| HETATM | 350 | Pt | 18.13502 | 14.86411 | 26.37224 | Pt | 0 | 0 | 0.00000 |
| HETATM | 351 | Pt | 18.12623 | 20.44719 | 26.38437 | Pt | 0 | 0 | 0.00000 |
| HETATM | 352 | Pt | 18.12703 | 26.03088 | 26.38218 | Pt | 0 | 0 | 0.00000 |
| HETATM | 353 | Pt | 6.05391  | 21.83754 | 26.38035 | Pt | 0 | 0 | 0.00000 |
| HETATM | 354 | Pt | 6.05570  | 5.09026  | 26.37971 | Pt | 0 | 0 | 0.00000 |
| HETATM | 355 | Pt | 6.05656  | 10.67288 | 26.38233 | Pt | 0 | 0 | 0.00000 |
| HETATM | 356 | Pt | 6.05664  | 16.25253 | 26.38370 | Pt | 0 | 0 | 0.00000 |
| HETATM | 357 | Pt | 10.88961 | 24.62948 | 26.38102 | Pt | 0 | 0 | 0.00000 |
| HETATM | 358 | Pt | 10.88915 | 7.88161  | 26.37837 | Pt | 0 | 0 | 0.00000 |
| HETATM | 359 | Pt | 10.88989 | 13.46008 | 26.36205 | Pt | 0 | 0 | 0.00000 |
| HETATM | 360 | Pt | 10.88341 | 19.05089 | 26.37224 | Pt | 0 | 0 | 0.00000 |
| HETATM | 361 | Pt | 15.72364 | 27.41944 | 26.38223 | Pt | 0 | 0 | 0.00000 |
| HETATM | 362 | Pt | 15.71921 | 10.67529 | 26.39225 | Pt | 0 | 0 | 0.00000 |
| HETATM | 363 | Pt | 15.72402 | 16.25113 | 26.38425 | Pt | 0 | 0 | 0.00000 |
| HETATM | 364 | Pt | 15.72289 | 21.83476 | 26.38436 | Pt | 0 | 0 | 0.00000 |
| HETATM | 365 | Pt | 1.21942  | 19.04521 | 26.38260 | Pt | 0 | 0 | 0.00000 |
| HETATM | 366 | Pt | 1.22478  | 2.29723  | 26.37755 | Pt | 0 | 0 | 0.00000 |
| HETATM | 367 | Pt | 1.21994  | 7.87998  | 26.38321 | Pt | 0 | 0 | 0.00000 |
| HETATM | 368 | Pt | 1.22004  | 13.46245 | 26.38219 | Pt | 0 | 0 | 0.00000 |
| HETATM | 369 | Pt | 6.04627  | 24.62889 | 26.30279 | Pt | 0 | 0 | 0.00000 |
| HETATM | 370 | Pt | 6.04649  | 7.88141  | 26.30455 | Pt | 0 | 0 | 0.00000 |
| HETATM | 371 | Pt | 6.04677  | 13.46326 | 26.30788 | Pt | 0 | 0 | 0.00000 |
| HETATM | 372 | Pt | 6.04622  | 19.04494 | 26.30605 | Pt | 0 | 0 | 0.00000 |
| HETATM | 373 | Pt | 10.88048 | 27.42018 | 26.30455 | Pt | 0 | 0 | 0.00000 |
| HETATM | 374 | Pt | 10.88328 | 10.67717 | 26.31649 | Pt | 0 | 0 | 0.00000 |
| HETATM | 375 | Pt | 10.88609 | 16.25208 | 26.31193 | Pt | 0 | 0 | 0.00000 |
| HETATM | 376 | Pt | 10.87850 | 21.83924 | 26.30270 | Pt | 0 | 0 | 0.00000 |
| HETATM | 377 | Pt | 15.71437 | 30.21135 | 26.30789 | Pt | 0 | 0 | 0.00000 |
| HETATM | 378 | Pt | 15.70988 | 13.46706 | 26.31195 | Pt | 0 | 0 | 0.00000 |
| HETATM | 379 | Pt | 15.71183 | 19.04045 | 26.31792 | Pt | 0 | 0 | 0.00000 |
| HETATM | 380 | Pt | 15.71441 | 24.62712 | 26.30631 | Pt | 0 | 0 | 0.00000 |
| HETATM | 381 | Pt | 1.21044  | 21.83687 | 26.30606 | Pt | 0 | 0 | 0.00000 |
| HETATM | 382 | Pt | 1.21423  | 5.08923  | 26.30271 | Pt | 0 | 0 | 0.00000 |
| HETATM | 383 | Pt | 1.21066  | 10.67119 | 26.30631 | Pt | 0 | 0 | 0.00000 |
| HETATM | 384 | Pt | 1.21090  | 16.25380 | 26.30594 | Pt | 0 | 0 | 0.00000 |
| HETATM | 385 | Pt | 2.02864  | 17.67014 | 28.75964 | Pt | 0 | 0 | 0.00000 |
| HETATM | 386 | Pt | 2.03387  | 23.25229 | 28.75962 | Pt | 0 | 0 | 0.00000 |
| HETATM | 387 | Pt | 2.03433  | 6.50780  | 28.75981 | Pt | 0 | 0 | 0.00000 |
| HETATM | 388 | Pt | 2.03094  | 12.08901 | 28.75914 | Pt | 0 | 0 | 0.00000 |
| HETATM | 389 | Pt | 6.86028  | 20.46579 | 28.75961 | Pt | 0 | 0 | 0.00000 |
| HETATM | 390 | Pt | 6.86464  | 26.04633 | 28.75716 | Pt | 0 | 0 | 0.00000 |
| HETATM | 391 | Pt | 6.86851  | 9.29970  | 28.75830 | Pt | 0 | 0 | 0.00000 |
| HETATM | 392 | Pt | 6.87141  | 14.87963 | 28.76391 | Pt | 0 | 0 | 0.00000 |
| HETATM | 393 | Pt | 11.69695 | 23.25879 | 28.75978 | Pt | 0 | 0 | 0.00000 |
| HETATM | 394 | Pt | 11.69772 | 28.84122 | 28.75829 | Pt | 0 | 0 | 0.00000 |
| HETATM | 395 | Pt | 11.68495 | 12.06568 | 28.67282 | Pt | 0 | 0 | 0.00000 |
| HETATM | 396 | Pt | 11.67605 | 17.67646 | 28.72137 | Pt | 0 | 0 | 0.00000 |
| HETATM | 397 | Pt | 16.53214 | 26.04641 | 28.75912 | Pt | 0 | 0 | 0.00000 |
| HETATM | 398 | Pt | 16.52869 | 31.63370 | 28.76390 | Pt | 0 | 0 | 0.00000 |
| HETATM | 399 | Pt | 16.54847 | 14.86336 | 28.72137 | Pt | 0 | 0 | 0.00000 |
| HETATM | 400 | Pt | 16.53235 | 20.46165 | 28.76181 | Pt | 0 | 0 | 0.00000 |
| HETATM | 401 | Pt | 2.02906  | 20.41735 | 28.75999 | Pt | 0 | 0 | 0.00000 |
| HETATM | 402 | Pt | 2.03492  | 3.67088  | 28.75712 | Pt | 0 | 0 | 0.00000 |



ENERGY -58937.981206  
END

XTLGRF 200

DESCRP FS

REMARK Pt111\_0.25ML\_8x8x7\_30.0\_vac hcp-displacement

FIXATOMS 1 128

CRYSTX 22.32968 22.32968 43.67409 90.00000 90.00000 60.00000

FORMAT ATOM (a6,1x,i5,1x,a5,1x,a3,1x,a1,1x,a5,3f10.5,1x,a5,i3,i2,1x,f8.5)

|        |    |    |          |          |          |    |   |   |         |
|--------|----|----|----------|----------|----------|----|---|---|---------|
| HETATM | 1  | Pt | 2.01698  | 17.64996 | 14.96615 | Pt | 0 | 0 | 0.00000 |
| HETATM | 2  | Pt | 2.01698  | 23.23238 | 14.96615 | Pt | 0 | 0 | 0.00000 |
| HETATM | 3  | Pt | 2.01698  | 6.48512  | 14.96615 | Pt | 0 | 0 | 0.00000 |
| HETATM | 4  | Pt | 2.01698  | 12.06754 | 14.96615 | Pt | 0 | 0 | 0.00000 |
| HETATM | 5  | Pt | 6.85150  | 20.44117 | 14.96615 | Pt | 0 | 0 | 0.00000 |
| HETATM | 6  | Pt | 6.85150  | 26.02359 | 14.96615 | Pt | 0 | 0 | 0.00000 |
| HETATM | 7  | Pt | 6.85150  | 9.27633  | 14.96615 | Pt | 0 | 0 | 0.00000 |
| HETATM | 8  | Pt | 6.85150  | 14.85875 | 14.96615 | Pt | 0 | 0 | 0.00000 |
| HETATM | 9  | Pt | 11.68602 | 23.23238 | 14.96615 | Pt | 0 | 0 | 0.00000 |
| HETATM | 10 | Pt | 11.68602 | 28.81480 | 14.96615 | Pt | 0 | 0 | 0.00000 |
| HETATM | 11 | Pt | 11.68602 | 12.06754 | 14.96615 | Pt | 0 | 0 | 0.00000 |
| HETATM | 12 | Pt | 11.68602 | 17.64996 | 14.96615 | Pt | 0 | 0 | 0.00000 |
| HETATM | 13 | Pt | 16.52053 | 26.02359 | 14.96615 | Pt | 0 | 0 | 0.00000 |
| HETATM | 14 | Pt | 16.52053 | 31.60601 | 14.96615 | Pt | 0 | 0 | 0.00000 |
| HETATM | 15 | Pt | 16.52053 | 14.85875 | 14.96615 | Pt | 0 | 0 | 0.00000 |
| HETATM | 16 | Pt | 16.52053 | 20.44117 | 14.96615 | Pt | 0 | 0 | 0.00000 |
| HETATM | 17 | Pt | 2.01698  | 20.44117 | 14.96615 | Pt | 0 | 0 | 0.00000 |
| HETATM | 18 | Pt | 2.01698  | 3.69391  | 14.96615 | Pt | 0 | 0 | 0.00000 |
| HETATM | 19 | Pt | 2.01698  | 9.27633  | 14.96615 | Pt | 0 | 0 | 0.00000 |
| HETATM | 20 | Pt | 2.01698  | 14.85875 | 14.96615 | Pt | 0 | 0 | 0.00000 |
| HETATM | 21 | Pt | 6.85150  | 23.23238 | 14.96615 | Pt | 0 | 0 | 0.00000 |
| HETATM | 22 | Pt | 6.85150  | 6.48512  | 14.96615 | Pt | 0 | 0 | 0.00000 |
| HETATM | 23 | Pt | 6.85150  | 12.06754 | 14.96615 | Pt | 0 | 0 | 0.00000 |
| HETATM | 24 | Pt | 6.85150  | 17.64996 | 14.96615 | Pt | 0 | 0 | 0.00000 |
| HETATM | 25 | Pt | 11.68602 | 26.02359 | 14.96615 | Pt | 0 | 0 | 0.00000 |
| HETATM | 26 | Pt | 11.68602 | 9.27633  | 14.96615 | Pt | 0 | 0 | 0.00000 |
| HETATM | 27 | Pt | 11.68602 | 14.85875 | 14.96615 | Pt | 0 | 0 | 0.00000 |
| HETATM | 28 | Pt | 11.68602 | 20.44117 | 14.96615 | Pt | 0 | 0 | 0.00000 |
| HETATM | 29 | Pt | 16.52053 | 28.81480 | 14.96615 | Pt | 0 | 0 | 0.00000 |
| HETATM | 30 | Pt | 16.52053 | 12.06754 | 14.96615 | Pt | 0 | 0 | 0.00000 |
| HETATM | 31 | Pt | 16.52053 | 17.64996 | 14.96615 | Pt | 0 | 0 | 0.00000 |
| HETATM | 32 | Pt | 16.52053 | 23.23238 | 14.96615 | Pt | 0 | 0 | 0.00000 |
| HETATM | 33 | Pt | 4.43424  | 19.04557 | 14.96615 | Pt | 0 | 0 | 0.00000 |
| HETATM | 34 | Pt | 4.43424  | 24.62799 | 14.96615 | Pt | 0 | 0 | 0.00000 |
| HETATM | 35 | Pt | 4.43424  | 7.88073  | 14.96615 | Pt | 0 | 0 | 0.00000 |
| HETATM | 36 | Pt | 4.43424  | 13.46315 | 14.96615 | Pt | 0 | 0 | 0.00000 |
| HETATM | 37 | Pt | 9.26876  | 21.83678 | 14.96615 | Pt | 0 | 0 | 0.00000 |
| HETATM | 38 | Pt | 9.26876  | 27.41920 | 14.96615 | Pt | 0 | 0 | 0.00000 |
| HETATM | 39 | Pt | 9.26876  | 10.67194 | 14.96615 | Pt | 0 | 0 | 0.00000 |
| HETATM | 40 | Pt | 9.26876  | 16.25436 | 14.96615 | Pt | 0 | 0 | 0.00000 |
| HETATM | 41 | Pt | 14.10328 | 24.62799 | 14.96615 | Pt | 0 | 0 | 0.00000 |
| HETATM | 42 | Pt | 14.10328 | 30.21041 | 14.96615 | Pt | 0 | 0 | 0.00000 |
| HETATM | 43 | Pt | 14.10328 | 13.46315 | 14.96615 | Pt | 0 | 0 | 0.00000 |
| HETATM | 44 | Pt | 14.10328 | 19.04557 | 14.96615 | Pt | 0 | 0 | 0.00000 |
| HETATM | 45 | Pt | 18.93779 | 27.41920 | 14.96615 | Pt | 0 | 0 | 0.00000 |
| HETATM | 46 | Pt | 18.93779 | 33.00162 | 14.96615 | Pt | 0 | 0 | 0.00000 |
| HETATM | 47 | Pt | 18.93779 | 16.25436 | 14.96615 | Pt | 0 | 0 | 0.00000 |
| HETATM | 48 | Pt | 18.93779 | 21.83678 | 14.96615 | Pt | 0 | 0 | 0.00000 |
| HETATM | 49 | Pt | 4.43424  | 21.83678 | 14.96615 | Pt | 0 | 0 | 0.00000 |
| HETATM | 50 | Pt | 4.43424  | 5.08952  | 14.96615 | Pt | 0 | 0 | 0.00000 |
| HETATM | 51 | Pt | 4.43424  | 10.67194 | 14.96615 | Pt | 0 | 0 | 0.00000 |
| HETATM | 52 | Pt | 4.43424  | 16.25436 | 14.96615 | Pt | 0 | 0 | 0.00000 |
| HETATM | 53 | Pt | 9.26876  | 24.62799 | 14.96615 | Pt | 0 | 0 | 0.00000 |
| HETATM | 54 | Pt | 9.26876  | 7.88073  | 14.96615 | Pt | 0 | 0 | 0.00000 |



|        |     |    |          |          |          |    |   |   |         |
|--------|-----|----|----------|----------|----------|----|---|---|---------|
| HETATM | 55  | Pt | 9.26876  | 13.46315 | 14.96615 | Pt | 0 | 0 | 0.00000 |
| HETATM | 56  | Pt | 9.26876  | 19.04557 | 14.96615 | Pt | 0 | 0 | 0.00000 |
| HETATM | 57  | Pt | 14.10328 | 27.41920 | 14.96615 | Pt | 0 | 0 | 0.00000 |
| HETATM | 58  | Pt | 14.10328 | 10.67194 | 14.96615 | Pt | 0 | 0 | 0.00000 |
| HETATM | 59  | Pt | 14.10328 | 16.25436 | 14.96615 | Pt | 0 | 0 | 0.00000 |
| HETATM | 60  | Pt | 14.10328 | 21.83678 | 14.96615 | Pt | 0 | 0 | 0.00000 |
| HETATM | 61  | Pt | 18.93779 | 30.21041 | 14.96615 | Pt | 0 | 0 | 0.00000 |
| HETATM | 62  | Pt | 18.93779 | 13.46315 | 14.96615 | Pt | 0 | 0 | 0.00000 |
| HETATM | 63  | Pt | 18.93779 | 19.04557 | 14.96615 | Pt | 0 | 0 | 0.00000 |
| HETATM | 64  | Pt | 18.93779 | 24.62799 | 14.96615 | Pt | 0 | 0 | 0.00000 |
| HETATM | 65  | Pt | 2.82273  | 19.04557 | 17.24517 | Pt | 0 | 0 | 0.00000 |
| HETATM | 66  | Pt | 2.82273  | 2.29831  | 17.24517 | Pt | 0 | 0 | 0.00000 |
| HETATM | 67  | Pt | 2.82273  | 7.88073  | 17.24517 | Pt | 0 | 0 | 0.00000 |
| HETATM | 68  | Pt | 2.82273  | 13.46315 | 17.24517 | Pt | 0 | 0 | 0.00000 |
| HETATM | 69  | Pt | 7.65725  | 21.83678 | 17.24517 | Pt | 0 | 0 | 0.00000 |
| HETATM | 70  | Pt | 7.65725  | 5.08952  | 17.24517 | Pt | 0 | 0 | 0.00000 |
| HETATM | 71  | Pt | 7.65725  | 10.67194 | 17.24517 | Pt | 0 | 0 | 0.00000 |
| HETATM | 72  | Pt | 7.65725  | 16.25436 | 17.24517 | Pt | 0 | 0 | 0.00000 |
| HETATM | 73  | Pt | 12.49177 | 24.62799 | 17.24517 | Pt | 0 | 0 | 0.00000 |
| HETATM | 74  | Pt | 12.49177 | 7.88073  | 17.24517 | Pt | 0 | 0 | 0.00000 |
| HETATM | 75  | Pt | 12.49177 | 13.46315 | 17.24517 | Pt | 0 | 0 | 0.00000 |
| HETATM | 76  | Pt | 12.49177 | 19.04557 | 17.24517 | Pt | 0 | 0 | 0.00000 |
| HETATM | 77  | Pt | 17.32628 | 27.41920 | 17.24517 | Pt | 0 | 0 | 0.00000 |
| HETATM | 78  | Pt | 17.32628 | 10.67194 | 17.24517 | Pt | 0 | 0 | 0.00000 |
| HETATM | 79  | Pt | 17.32628 | 16.25436 | 17.24517 | Pt | 0 | 0 | 0.00000 |
| HETATM | 80  | Pt | 17.32628 | 21.83678 | 17.24517 | Pt | 0 | 0 | 0.00000 |
| HETATM | 81  | Pt | 2.82273  | 21.83678 | 17.24517 | Pt | 0 | 0 | 0.00000 |
| HETATM | 82  | Pt | 2.82273  | 5.08952  | 17.24517 | Pt | 0 | 0 | 0.00000 |
| HETATM | 83  | Pt | 2.82273  | 10.67194 | 17.24517 | Pt | 0 | 0 | 0.00000 |
| HETATM | 84  | Pt | 2.82273  | 16.25436 | 17.24517 | Pt | 0 | 0 | 0.00000 |
| HETATM | 85  | Pt | 7.65725  | 24.62799 | 17.24517 | Pt | 0 | 0 | 0.00000 |
| HETATM | 86  | Pt | 7.65725  | 7.88073  | 17.24517 | Pt | 0 | 0 | 0.00000 |
| HETATM | 87  | Pt | 7.65725  | 13.46315 | 17.24517 | Pt | 0 | 0 | 0.00000 |
| HETATM | 88  | Pt | 7.65725  | 19.04557 | 17.24517 | Pt | 0 | 0 | 0.00000 |
| HETATM | 89  | Pt | 12.49177 | 27.41920 | 17.24517 | Pt | 0 | 0 | 0.00000 |
| HETATM | 90  | Pt | 12.49177 | 10.67194 | 17.24517 | Pt | 0 | 0 | 0.00000 |
| HETATM | 91  | Pt | 12.49177 | 16.25436 | 17.24517 | Pt | 0 | 0 | 0.00000 |
| HETATM | 92  | Pt | 12.49177 | 21.83678 | 17.24517 | Pt | 0 | 0 | 0.00000 |
| HETATM | 93  | Pt | 17.32628 | 30.21041 | 17.24517 | Pt | 0 | 0 | 0.00000 |
| HETATM | 94  | Pt | 17.32628 | 13.46315 | 17.24517 | Pt | 0 | 0 | 0.00000 |
| HETATM | 95  | Pt | 17.32628 | 19.04557 | 17.24517 | Pt | 0 | 0 | 0.00000 |
| HETATM | 96  | Pt | 17.32628 | 24.62799 | 17.24517 | Pt | 0 | 0 | 0.00000 |
| HETATM | 97  | Pt | 5.23999  | 20.44117 | 17.24517 | Pt | 0 | 0 | 0.00000 |
| HETATM | 98  | Pt | 5.23999  | 3.69391  | 17.24517 | Pt | 0 | 0 | 0.00000 |
| HETATM | 99  | Pt | 5.23999  | 9.27633  | 17.24517 | Pt | 0 | 0 | 0.00000 |
| HETATM | 100 | Pt | 5.23999  | 14.85875 | 17.24517 | Pt | 0 | 0 | 0.00000 |
| HETATM | 101 | Pt | 10.07451 | 23.23238 | 17.24517 | Pt | 0 | 0 | 0.00000 |
| HETATM | 102 | Pt | 10.07451 | 6.48512  | 17.24517 | Pt | 0 | 0 | 0.00000 |
| HETATM | 103 | Pt | 10.07451 | 12.06754 | 17.24517 | Pt | 0 | 0 | 0.00000 |
| HETATM | 104 | Pt | 10.07451 | 17.64996 | 17.24517 | Pt | 0 | 0 | 0.00000 |
| HETATM | 105 | Pt | 14.90903 | 26.02359 | 17.24517 | Pt | 0 | 0 | 0.00000 |
| HETATM | 106 | Pt | 14.90903 | 9.27633  | 17.24517 | Pt | 0 | 0 | 0.00000 |
| HETATM | 107 | Pt | 14.90903 | 14.85875 | 17.24517 | Pt | 0 | 0 | 0.00000 |
| HETATM | 108 | Pt | 14.90903 | 20.44117 | 17.24517 | Pt | 0 | 0 | 0.00000 |
| HETATM | 109 | Pt | 0.40547  | 17.64996 | 17.24517 | Pt | 0 | 0 | 0.00000 |
| HETATM | 110 | Pt | 0.40547  | 0.90270  | 17.24517 | Pt | 0 | 0 | 0.00000 |
| HETATM | 111 | Pt | 0.40547  | 6.48512  | 17.24517 | Pt | 0 | 0 | 0.00000 |
| HETATM | 112 | Pt | 0.40547  | 12.06754 | 17.24517 | Pt | 0 | 0 | 0.00000 |
| HETATM | 113 | Pt | 5.23999  | 23.23238 | 17.24517 | Pt | 0 | 0 | 0.00000 |
| HETATM | 114 | Pt | 5.23999  | 6.48512  | 17.24517 | Pt | 0 | 0 | 0.00000 |
| HETATM | 115 | Pt | 5.23999  | 12.06754 | 17.24517 | Pt | 0 | 0 | 0.00000 |
| HETATM | 116 | Pt | 5.23999  | 17.64996 | 17.24517 | Pt | 0 | 0 | 0.00000 |
| HETATM | 117 | Pt | 10.07451 | 26.02359 | 17.24517 | Pt | 0 | 0 | 0.00000 |

|        |     |    |          |          |          |    |   |   |         |
|--------|-----|----|----------|----------|----------|----|---|---|---------|
| HETATM | 118 | Pt | 10.07451 | 9.27633  | 17.24517 | Pt | 0 | 0 | 0.00000 |
| HETATM | 119 | Pt | 10.07451 | 14.85875 | 17.24517 | Pt | 0 | 0 | 0.00000 |
| HETATM | 120 | Pt | 10.07451 | 20.44117 | 17.24517 | Pt | 0 | 0 | 0.00000 |
| HETATM | 121 | Pt | 14.90903 | 28.81480 | 17.24517 | Pt | 0 | 0 | 0.00000 |
| HETATM | 122 | Pt | 14.90903 | 12.06754 | 17.24517 | Pt | 0 | 0 | 0.00000 |
| HETATM | 123 | Pt | 14.90903 | 17.64996 | 17.24517 | Pt | 0 | 0 | 0.00000 |
| HETATM | 124 | Pt | 14.90903 | 23.23238 | 17.24517 | Pt | 0 | 0 | 0.00000 |
| HETATM | 125 | Pt | 0.40547  | 20.44117 | 17.24517 | Pt | 0 | 0 | 0.00000 |
| HETATM | 126 | Pt | 0.40547  | 3.69391  | 17.24517 | Pt | 0 | 0 | 0.00000 |
| HETATM | 127 | Pt | 0.40547  | 9.27633  | 17.24517 | Pt | 0 | 0 | 0.00000 |
| HETATM | 128 | Pt | 0.40547  | 14.85875 | 17.24517 | Pt | 0 | 0 | 0.00000 |
| HETATM | 129 | Pt | 3.62810  | 20.44051 | 19.52419 | Pt | 0 | 0 | 0.00000 |
| HETATM | 130 | Pt | 3.62857  | 3.69382  | 19.52278 | Pt | 0 | 0 | 0.00000 |
| HETATM | 131 | Pt | 3.62777  | 9.27644  | 19.52424 | Pt | 0 | 0 | 0.00000 |
| HETATM | 132 | Pt | 3.62817  | 14.85841 | 19.52416 | Pt | 0 | 0 | 0.00000 |
| HETATM | 133 | Pt | 8.46288  | 23.23241 | 19.52278 | Pt | 0 | 0 | 0.00000 |
| HETATM | 134 | Pt | 8.46286  | 6.48488  | 19.52335 | Pt | 0 | 0 | 0.00000 |
| HETATM | 135 | Pt | 8.46255  | 12.06725 | 19.52415 | Pt | 0 | 0 | 0.00000 |
| HETATM | 136 | Pt | 8.46230  | 17.64977 | 19.52392 | Pt | 0 | 0 | 0.00000 |
| HETATM | 137 | Pt | 13.29796 | 26.02303 | 19.52425 | Pt | 0 | 0 | 0.00000 |
| HETATM | 138 | Pt | 13.29750 | 9.27580  | 19.52415 | Pt | 0 | 0 | 0.00000 |
| HETATM | 139 | Pt | 13.29751 | 14.85874 | 19.52239 | Pt | 0 | 0 | 0.00000 |
| HETATM | 140 | Pt | 13.29776 | 20.44065 | 19.52457 | Pt | 0 | 0 | 0.00000 |
| HETATM | 141 | Pt | 18.13190 | 28.81436 | 19.52416 | Pt | 0 | 0 | 0.00000 |
| HETATM | 142 | Pt | 18.13223 | 12.06684 | 19.52392 | Pt | 0 | 0 | 0.00000 |
| HETATM | 143 | Pt | 18.13146 | 17.64991 | 19.52457 | Pt | 0 | 0 | 0.00000 |
| HETATM | 144 | Pt | 18.13178 | 23.23193 | 19.52432 | Pt | 0 | 0 | 0.00000 |
| HETATM | 145 | Pt | 3.62825  | 23.23254 | 19.52357 | Pt | 0 | 0 | 0.00000 |
| HETATM | 146 | Pt | 3.62788  | 6.48603  | 19.52375 | Pt | 0 | 0 | 0.00000 |
| HETATM | 147 | Pt | 3.62802  | 12.06812 | 19.52415 | Pt | 0 | 0 | 0.00000 |
| HETATM | 148 | Pt | 3.62820  | 17.65010 | 19.52426 | Pt | 0 | 0 | 0.00000 |
| HETATM | 149 | Pt | 8.46317  | 26.02420 | 19.52294 | Pt | 0 | 0 | 0.00000 |
| HETATM | 150 | Pt | 8.46236  | 9.27646  | 19.52351 | Pt | 0 | 0 | 0.00000 |
| HETATM | 151 | Pt | 8.46254  | 14.85919 | 19.52438 | Pt | 0 | 0 | 0.00000 |
| HETATM | 152 | Pt | 8.46256  | 20.44162 | 19.52339 | Pt | 0 | 0 | 0.00000 |
| HETATM | 153 | Pt | 13.29788 | 28.81519 | 19.52431 | Pt | 0 | 0 | 0.00000 |
| HETATM | 154 | Pt | 13.29757 | 12.06743 | 19.52236 | Pt | 0 | 0 | 0.00000 |
| HETATM | 155 | Pt | 13.29733 | 17.65064 | 19.52411 | Pt | 0 | 0 | 0.00000 |
| HETATM | 156 | Pt | 13.29797 | 23.23223 | 19.52465 | Pt | 0 | 0 | 0.00000 |
| HETATM | 157 | Pt | 18.13168 | 31.60618 | 19.52459 | Pt | 0 | 0 | 0.00000 |
| HETATM | 158 | Pt | 18.13247 | 14.85912 | 19.52328 | Pt | 0 | 0 | 0.00000 |
| HETATM | 159 | Pt | 18.13138 | 20.44148 | 19.52509 | Pt | 0 | 0 | 0.00000 |
| HETATM | 160 | Pt | 18.13193 | 26.02383 | 19.52408 | Pt | 0 | 0 | 0.00000 |
| HETATM | 161 | Pt | 6.04600  | 21.83665 | 19.52357 | Pt | 0 | 0 | 0.00000 |
| HETATM | 162 | Pt | 6.04618  | 5.08997  | 19.52294 | Pt | 0 | 0 | 0.00000 |
| HETATM | 163 | Pt | 6.04590  | 10.67244 | 19.52431 | Pt | 0 | 0 | 0.00000 |
| HETATM | 164 | Pt | 6.04606  | 16.25413 | 19.52459 | Pt | 0 | 0 | 0.00000 |
| HETATM | 165 | Pt | 10.88135 | 24.62792 | 19.52375 | Pt | 0 | 0 | 0.00000 |
| HETATM | 166 | Pt | 10.88070 | 7.88023  | 19.52351 | Pt | 0 | 0 | 0.00000 |
| HETATM | 167 | Pt | 10.88014 | 13.46313 | 19.52236 | Pt | 0 | 0 | 0.00000 |
| HETATM | 168 | Pt | 10.88036 | 19.04612 | 19.52328 | Pt | 0 | 0 | 0.00000 |
| HETATM | 169 | Pt | 15.71551 | 27.41908 | 19.52415 | Pt | 0 | 0 | 0.00000 |
| HETATM | 170 | Pt | 15.71539 | 10.67175 | 19.52438 | Pt | 0 | 0 | 0.00000 |
| HETATM | 171 | Pt | 15.71546 | 16.25453 | 19.52411 | Pt | 0 | 0 | 0.00000 |
| HETATM | 172 | Pt | 15.71537 | 21.83636 | 19.52509 | Pt | 0 | 0 | 0.00000 |
| HETATM | 173 | Pt | 1.21148  | 19.04539 | 19.52426 | Pt | 0 | 0 | 0.00000 |
| HETATM | 174 | Pt | 1.21184  | 2.29815  | 19.52339 | Pt | 0 | 0 | 0.00000 |
| HETATM | 175 | Pt | 1.21086  | 7.88104  | 19.52465 | Pt | 0 | 0 | 0.00000 |
| HETATM | 176 | Pt | 1.21149  | 13.46317 | 19.52408 | Pt | 0 | 0 | 0.00000 |
| HETATM | 177 | Pt | 6.04587  | 24.62821 | 19.52433 | Pt | 0 | 0 | 0.00000 |
| HETATM | 178 | Pt | 6.04529  | 7.88117  | 19.52529 | Pt | 0 | 0 | 0.00000 |
| HETATM | 179 | Pt | 6.04567  | 13.46332 | 19.52616 | Pt | 0 | 0 | 0.00000 |
| HETATM | 180 | Pt | 6.04552  | 19.04528 | 19.52583 | Pt | 0 | 0 | 0.00000 |

|        |     |    |          |          |          |    |   |   |         |
|--------|-----|----|----------|----------|----------|----|---|---|---------|
| HETATM | 181 | Pt | 10.88088 | 27.41902 | 19.52529 | Pt | 0 | 0 | 0.00000 |
| HETATM | 182 | Pt | 10.87978 | 10.67111 | 19.52415 | Pt | 0 | 0 | 0.00000 |
| HETATM | 183 | Pt | 10.87959 | 16.25514 | 19.52435 | Pt | 0 | 0 | 0.00000 |
| HETATM | 184 | Pt | 10.88057 | 21.83706 | 19.52492 | Pt | 0 | 0 | 0.00000 |
| HETATM | 185 | Pt | 15.71496 | 30.21043 | 19.52616 | Pt | 0 | 0 | 0.00000 |
| HETATM | 186 | Pt | 15.71579 | 13.46296 | 19.52435 | Pt | 0 | 0 | 0.00000 |
| HETATM | 187 | Pt | 15.71476 | 19.04553 | 19.52682 | Pt | 0 | 0 | 0.00000 |
| HETATM | 188 | Pt | 15.71509 | 24.62770 | 19.52588 | Pt | 0 | 0 | 0.00000 |
| HETATM | 189 | Pt | 1.21109  | 21.83644 | 19.52583 | Pt | 0 | 0 | 0.00000 |
| HETATM | 190 | Pt | 1.21132  | 5.08993  | 19.52492 | Pt | 0 | 0 | 0.00000 |
| HETATM | 191 | Pt | 1.21082  | 10.67206 | 19.52588 | Pt | 0 | 0 | 0.00000 |
| HETATM | 192 | Pt | 1.21118  | 16.25429 | 19.52565 | Pt | 0 | 0 | 0.00000 |
| HETATM | 193 | Pt | 2.01721  | 17.65036 | 21.80538 | Pt | 0 | 0 | 0.00000 |
| HETATM | 194 | Pt | 2.01724  | 23.23283 | 21.80451 | Pt | 0 | 0 | 0.00000 |
| HETATM | 195 | Pt | 2.01666  | 6.48648  | 21.80514 | Pt | 0 | 0 | 0.00000 |
| HETATM | 196 | Pt | 2.01690  | 12.06834 | 21.80535 | Pt | 0 | 0 | 0.00000 |
| HETATM | 197 | Pt | 6.85176  | 20.44163 | 21.80451 | Pt | 0 | 0 | 0.00000 |
| HETATM | 198 | Pt | 6.85237  | 26.02511 | 21.80250 | Pt | 0 | 0 | 0.00000 |
| HETATM | 199 | Pt | 6.85135  | 9.27791  | 21.80472 | Pt | 0 | 0 | 0.00000 |
| HETATM | 200 | Pt | 6.85210  | 14.85924 | 21.80695 | Pt | 0 | 0 | 0.00000 |
| HETATM | 201 | Pt | 11.68735 | 23.23279 | 21.80514 | Pt | 0 | 0 | 0.00000 |
| HETATM | 202 | Pt | 11.68745 | 28.81546 | 21.80472 | Pt | 0 | 0 | 0.00000 |
| HETATM | 203 | Pt | 11.68563 | 12.06688 | 21.79954 | Pt | 0 | 0 | 0.00000 |
| HETATM | 204 | Pt | 11.68534 | 17.65209 | 21.80340 | Pt | 0 | 0 | 0.00000 |
| HETATM | 205 | Pt | 16.52126 | 26.02392 | 21.80535 | Pt | 0 | 0 | 0.00000 |
| HETATM | 206 | Pt | 16.52065 | 31.60678 | 21.80696 | Pt | 0 | 0 | 0.00000 |
| HETATM | 207 | Pt | 16.52271 | 14.85923 | 21.80340 | Pt | 0 | 0 | 0.00000 |
| HETATM | 208 | Pt | 16.52048 | 20.44109 | 21.80854 | Pt | 0 | 0 | 0.00000 |
| HETATM | 209 | Pt | 2.01699  | 20.43997 | 21.80567 | Pt | 0 | 0 | 0.00000 |
| HETATM | 210 | Pt | 2.01851  | 3.69340  | 21.80227 | Pt | 0 | 0 | 0.00000 |
| HETATM | 211 | Pt | 2.01639  | 9.27588  | 21.80581 | Pt | 0 | 0 | 0.00000 |
| HETATM | 212 | Pt | 2.01717  | 14.85785 | 21.80524 | Pt | 0 | 0 | 0.00000 |
| HETATM | 213 | Pt | 6.85188  | 23.23226 | 21.80273 | Pt | 0 | 0 | 0.00000 |
| HETATM | 214 | Pt | 6.85196  | 6.48518  | 21.80342 | Pt | 0 | 0 | 0.00000 |
| HETATM | 215 | Pt | 6.85213  | 12.06776 | 21.80643 | Pt | 0 | 0 | 0.00000 |
| HETATM | 216 | Pt | 6.85161  | 17.64847 | 21.80615 | Pt | 0 | 0 | 0.00000 |
| HETATM | 217 | Pt | 11.68753 | 26.02271 | 21.80496 | Pt | 0 | 0 | 0.00000 |
| HETATM | 218 | Pt | 11.68602 | 9.27457  | 21.80373 | Pt | 0 | 0 | 0.00000 |
| HETATM | 219 | Pt | 11.68524 | 14.85945 | 21.79975 | Pt | 0 | 0 | 0.00000 |
| HETATM | 220 | Pt | 11.68668 | 20.44102 | 21.80387 | Pt | 0 | 0 | 0.00000 |
| HETATM | 221 | Pt | 16.52123 | 28.81387 | 21.80554 | Pt | 0 | 0 | 0.00000 |
| HETATM | 222 | Pt | 16.52210 | 12.06640 | 21.80505 | Pt | 0 | 0 | 0.00000 |
| HETATM | 223 | Pt | 16.52033 | 17.64919 | 21.80743 | Pt | 0 | 0 | 0.00000 |
| HETATM | 224 | Pt | 16.52110 | 23.23103 | 21.80607 | Pt | 0 | 0 | 0.00000 |
| HETATM | 225 | Pt | 4.43319  | 19.04498 | 21.80567 | Pt | 0 | 0 | 0.00000 |
| HETATM | 226 | Pt | 4.43394  | 24.62826 | 21.80273 | Pt | 0 | 0 | 0.00000 |
| HETATM | 227 | Pt | 4.43271  | 7.88160  | 21.80496 | Pt | 0 | 0 | 0.00000 |
| HETATM | 228 | Pt | 4.43308  | 13.46329 | 21.80554 | Pt | 0 | 0 | 0.00000 |
| HETATM | 229 | Pt | 9.26754  | 21.83784 | 21.80227 | Pt | 0 | 0 | 0.00000 |
| HETATM | 230 | Pt | 9.26857  | 27.41963 | 21.80342 | Pt | 0 | 0 | 0.00000 |
| HETATM | 231 | Pt | 9.26723  | 10.67106 | 21.80373 | Pt | 0 | 0 | 0.00000 |
| HETATM | 232 | Pt | 9.26698  | 16.25515 | 21.80504 | Pt | 0 | 0 | 0.00000 |
| HETATM | 233 | Pt | 14.10317 | 24.62725 | 21.80581 | Pt | 0 | 0 | 0.00000 |
| HETATM | 234 | Pt | 14.10314 | 30.21107 | 21.80643 | Pt | 0 | 0 | 0.00000 |
| HETATM | 235 | Pt | 14.10426 | 13.46282 | 21.79975 | Pt | 0 | 0 | 0.00000 |
| HETATM | 236 | Pt | 14.10270 | 19.04501 | 21.80743 | Pt | 0 | 0 | 0.00000 |
| HETATM | 237 | Pt | 18.93692 | 27.41891 | 21.80524 | Pt | 0 | 0 | 0.00000 |
| HETATM | 238 | Pt | 18.93644 | 33.00097 | 21.80615 | Pt | 0 | 0 | 0.00000 |
| HETATM | 239 | Pt | 18.93733 | 16.25486 | 21.80387 | Pt | 0 | 0 | 0.00000 |
| HETATM | 240 | Pt | 18.93633 | 21.83659 | 21.80607 | Pt | 0 | 0 | 0.00000 |
| HETATM | 241 | Pt | 4.43403  | 21.83642 | 21.79871 | Pt | 0 | 0 | 0.00000 |
| HETATM | 242 | Pt | 4.43459  | 5.09039  | 21.79716 | Pt | 0 | 0 | 0.00000 |
| HETATM | 243 | Pt | 4.43381  | 10.67270 | 21.79957 | Pt | 0 | 0 | 0.00000 |

|        |     |    |          |          |          |    |   |   |         |
|--------|-----|----|----------|----------|----------|----|---|---|---------|
| HETATM | 244 | Pt | 4.43409  | 16.25395 | 21.79980 | Pt | 0 | 0 | 0.00000 |
| HETATM | 245 | Pt | 9.26934  | 24.62873 | 21.79716 | Pt | 0 | 0 | 0.00000 |
| HETATM | 246 | Pt | 9.26894  | 7.88105  | 21.79827 | Pt | 0 | 0 | 0.00000 |
| HETATM | 247 | Pt | 9.26873  | 13.46342 | 21.79932 | Pt | 0 | 0 | 0.00000 |
| HETATM | 248 | Pt | 9.26833  | 19.04544 | 21.79831 | Pt | 0 | 0 | 0.00000 |
| HETATM | 249 | Pt | 14.10415 | 27.41921 | 21.79958 | Pt | 0 | 0 | 0.00000 |
| HETATM | 250 | Pt | 14.10352 | 10.67206 | 21.79932 | Pt | 0 | 0 | 0.00000 |
| HETATM | 251 | Pt | 14.10342 | 16.25462 | 21.79839 | Pt | 0 | 0 | 0.00000 |
| HETATM | 252 | Pt | 14.10406 | 21.83532 | 21.80157 | Pt | 0 | 0 | 0.00000 |
| HETATM | 253 | Pt | 18.93750 | 30.21008 | 21.79980 | Pt | 0 | 0 | 0.00000 |
| HETATM | 254 | Pt | 18.93790 | 13.46272 | 21.79831 | Pt | 0 | 0 | 0.00000 |
| HETATM | 255 | Pt | 18.93614 | 19.04553 | 21.80157 | Pt | 0 | 0 | 0.00000 |
| HETATM | 256 | Pt | 18.93764 | 24.62772 | 21.79943 | Pt | 0 | 0 | 0.00000 |
| HETATM | 257 | Pt | 2.82225  | 19.04473 | 24.09283 | Pt | 0 | 0 | 0.00000 |
| HETATM | 258 | Pt | 2.82479  | 2.29823  | 24.08851 | Pt | 0 | 0 | 0.00000 |
| HETATM | 259 | Pt | 2.82187  | 7.88125  | 24.09265 | Pt | 0 | 0 | 0.00000 |
| HETATM | 260 | Pt | 2.82222  | 13.46283 | 24.09248 | Pt | 0 | 0 | 0.00000 |
| HETATM | 261 | Pt | 7.65615  | 21.83852 | 24.08851 | Pt | 0 | 0 | 0.00000 |
| HETATM | 262 | Pt | 7.65781  | 5.09049  | 24.08884 | Pt | 0 | 0 | 0.00000 |
| HETATM | 263 | Pt | 7.65718  | 10.67370 | 24.09251 | Pt | 0 | 0 | 0.00000 |
| HETATM | 264 | Pt | 7.65754  | 16.25219 | 24.09611 | Pt | 0 | 0 | 0.00000 |
| HETATM | 265 | Pt | 12.49265 | 24.62751 | 24.09266 | Pt | 0 | 0 | 0.00000 |
| HETATM | 266 | Pt | 12.49333 | 7.88155  | 24.09251 | Pt | 0 | 0 | 0.00000 |
| HETATM | 267 | Pt | 12.49223 | 13.46395 | 24.07331 | Pt | 0 | 0 | 0.00000 |
| HETATM | 268 | Pt | 12.49151 | 19.04657 | 24.09119 | Pt | 0 | 0 | 0.00000 |
| HETATM | 269 | Pt | 17.32627 | 27.41860 | 24.09248 | Pt | 0 | 0 | 0.00000 |
| HETATM | 270 | Pt | 17.32426 | 10.67111 | 24.09611 | Pt | 0 | 0 | 0.00000 |
| HETATM | 271 | Pt | 17.32728 | 16.25463 | 24.09119 | Pt | 0 | 0 | 0.00000 |
| HETATM | 272 | Pt | 17.32565 | 21.83569 | 24.09452 | Pt | 0 | 0 | 0.00000 |
| HETATM | 273 | Pt | 2.82827  | 21.83639 | 24.07953 | Pt | 0 | 0 | 0.00000 |
| HETATM | 274 | Pt | 2.83046  | 5.09025  | 24.07676 | Pt | 0 | 0 | 0.00000 |
| HETATM | 275 | Pt | 2.82821  | 10.67212 | 24.08015 | Pt | 0 | 0 | 0.00000 |
| HETATM | 276 | Pt | 2.82860  | 16.25374 | 24.08004 | Pt | 0 | 0 | 0.00000 |
| HETATM | 277 | Pt | 7.66374  | 24.62949 | 24.07601 | Pt | 0 | 0 | 0.00000 |
| HETATM | 278 | Pt | 7.66373  | 7.88182  | 24.07710 | Pt | 0 | 0 | 0.00000 |
| HETATM | 279 | Pt | 7.66571  | 13.46420 | 24.08434 | Pt | 0 | 0 | 0.00000 |
| HETATM | 280 | Pt | 7.66369  | 19.04447 | 24.07913 | Pt | 0 | 0 | 0.00000 |
| HETATM | 281 | Pt | 12.49907 | 27.41971 | 24.07966 | Pt | 0 | 0 | 0.00000 |
| HETATM | 282 | Pt | 12.49510 | 10.66986 | 24.07526 | Pt | 0 | 0 | 0.00000 |
| HETATM | 283 | Pt | 12.49497 | 16.25686 | 24.07378 | Pt | 0 | 0 | 0.00000 |
| HETATM | 284 | Pt | 12.49865 | 21.83548 | 24.08114 | Pt | 0 | 0 | 0.00000 |
| HETATM | 285 | Pt | 17.33178 | 30.21001 | 24.08102 | Pt | 0 | 0 | 0.00000 |
| HETATM | 286 | Pt | 17.33048 | 13.46249 | 24.08124 | Pt | 0 | 0 | 0.00000 |
| HETATM | 287 | Pt | 17.32928 | 19.04400 | 24.08718 | Pt | 0 | 0 | 0.00000 |
| HETATM | 288 | Pt | 17.33220 | 24.62713 | 24.08030 | Pt | 0 | 0 | 0.00000 |
| HETATM | 289 | Pt | 5.23688  | 20.44578 | 24.07953 | Pt | 0 | 0 | 0.00000 |
| HETATM | 290 | Pt | 5.23804  | 3.70029  | 24.07601 | Pt | 0 | 0 | 0.00000 |
| HETATM | 291 | Pt | 5.23678  | 9.28291  | 24.07965 | Pt | 0 | 0 | 0.00000 |
| HETATM | 292 | Pt | 5.23690  | 14.86332 | 24.08102 | Pt | 0 | 0 | 0.00000 |
| HETATM | 293 | Pt | 10.07128 | 23.23945 | 24.07676 | Pt | 0 | 0 | 0.00000 |
| HETATM | 294 | Pt | 10.07222 | 6.49128  | 24.07710 | Pt | 0 | 0 | 0.00000 |
| HETATM | 295 | Pt | 10.07104 | 12.06939 | 24.07526 | Pt | 0 | 0 | 0.00000 |
| HETATM | 296 | Pt | 10.07184 | 17.65326 | 24.08124 | Pt | 0 | 0 | 0.00000 |
| HETATM | 297 | Pt | 14.90645 | 26.02843 | 24.08015 | Pt | 0 | 0 | 0.00000 |
| HETATM | 298 | Pt | 14.90571 | 9.28419  | 24.08435 | Pt | 0 | 0 | 0.00000 |
| HETATM | 299 | Pt | 14.90959 | 14.86278 | 24.07378 | Pt | 0 | 0 | 0.00000 |
| HETATM | 300 | Pt | 14.90618 | 20.44298 | 24.08718 | Pt | 0 | 0 | 0.00000 |
| HETATM | 301 | Pt | 0.40201  | 17.65473 | 24.08004 | Pt | 0 | 0 | 0.00000 |
| HETATM | 302 | Pt | 0.40130  | 0.90773  | 24.07913 | Pt | 0 | 0 | 0.00000 |
| HETATM | 303 | Pt | 0.40091  | 6.49043  | 24.08114 | Pt | 0 | 0 | 0.00000 |
| HETATM | 304 | Pt | 0.40177  | 12.07224 | 24.08030 | Pt | 0 | 0 | 0.00000 |
| HETATM | 305 | Pt | 5.23711  | 23.22739 | 24.07685 | Pt | 0 | 0 | 0.00000 |
| HETATM | 306 | Pt | 5.23744  | 6.48111  | 24.07778 | Pt | 0 | 0 | 0.00000 |

|        |     |    |          |          |          |    |   |   |         |
|--------|-----|----|----------|----------|----------|----|---|---|---------|
| HETATM | 307 | Pt | 5.23719  | 12.06326 | 24.08075 | Pt | 0 | 0 | 0.00000 |
| HETATM | 308 | Pt | 5.23715  | 17.64341 | 24.08102 | Pt | 0 | 0 | 0.00000 |
| HETATM | 309 | Pt | 10.07231 | 26.01937 | 24.07778 | Pt | 0 | 0 | 0.00000 |
| HETATM | 310 | Pt | 10.07244 | 9.27275  | 24.08036 | Pt | 0 | 0 | 0.00000 |
| HETATM | 311 | Pt | 10.07081 | 14.85715 | 24.07825 | Pt | 0 | 0 | 0.00000 |
| HETATM | 312 | Pt | 10.06951 | 20.43841 | 24.07344 | Pt | 0 | 0 | 0.00000 |
| HETATM | 313 | Pt | 14.90672 | 28.81024 | 24.08076 | Pt | 0 | 0 | 0.00000 |
| HETATM | 314 | Pt | 14.90949 | 12.06354 | 24.07825 | Pt | 0 | 0 | 0.00000 |
| HETATM | 315 | Pt | 14.90499 | 17.64298 | 24.08528 | Pt | 0 | 0 | 0.00000 |
| HETATM | 316 | Pt | 14.90620 | 23.22535 | 24.08137 | Pt | 0 | 0 | 0.00000 |
| HETATM | 317 | Pt | 0.40123  | 20.43543 | 24.08102 | Pt | 0 | 0 | 0.00000 |
| HETATM | 318 | Pt | 0.40558  | 3.68820  | 24.07344 | Pt | 0 | 0 | 0.00000 |
| HETATM | 319 | Pt | 0.40079  | 9.27037  | 24.08137 | Pt | 0 | 0 | 0.00000 |
| HETATM | 320 | Pt | 0.40207  | 14.85286 | 24.07986 | Pt | 0 | 0 | 0.00000 |
| HETATM | 321 | Pt | 3.62304  | 20.43174 | 26.38225 | Pt | 0 | 0 | 0.00000 |
| HETATM | 322 | Pt | 3.62738  | 3.68643  | 26.37874 | Pt | 0 | 0 | 0.00000 |
| HETATM | 323 | Pt | 3.62444  | 9.26916  | 26.38299 | Pt | 0 | 0 | 0.00000 |
| HETATM | 324 | Pt | 3.62401  | 14.84977 | 26.38301 | Pt | 0 | 0 | 0.00000 |
| HETATM | 325 | Pt | 8.45707  | 23.22769 | 26.37874 | Pt | 0 | 0 | 0.00000 |
| HETATM | 326 | Pt | 8.45831  | 6.47699  | 26.37804 | Pt | 0 | 0 | 0.00000 |
| HETATM | 327 | Pt | 8.46250  | 12.06331 | 26.38795 | Pt | 0 | 0 | 0.00000 |
| HETATM | 328 | Pt | 8.46050  | 17.63918 | 26.38230 | Pt | 0 | 0 | 0.00000 |
| HETATM | 329 | Pt | 13.29333 | 26.01650 | 26.38299 | Pt | 0 | 0 | 0.00000 |
| HETATM | 330 | Pt | 13.29410 | 9.27377  | 26.38795 | Pt | 0 | 0 | 0.00000 |
| HETATM | 331 | Pt | 13.29637 | 14.85676 | 26.35202 | Pt | 0 | 0 | 0.00000 |
| HETATM | 332 | Pt | 13.29122 | 20.42889 | 26.39029 | Pt | 0 | 0 | 0.00000 |
| HETATM | 333 | Pt | 18.12650 | 28.80644 | 26.38301 | Pt | 0 | 0 | 0.00000 |
| HETATM | 334 | Pt | 18.12395 | 12.05999 | 26.38230 | Pt | 0 | 0 | 0.00000 |
| HETATM | 335 | Pt | 18.12455 | 17.63836 | 26.39029 | Pt | 0 | 0 | 0.00000 |
| HETATM | 336 | Pt | 18.12638 | 23.22258 | 26.38380 | Pt | 0 | 0 | 0.00000 |
| HETATM | 337 | Pt | 3.62571  | 23.23956 | 26.38006 | Pt | 0 | 0 | 0.00000 |
| HETATM | 338 | Pt | 3.62577  | 6.49445  | 26.38112 | Pt | 0 | 0 | 0.00000 |
| HETATM | 339 | Pt | 3.62446  | 12.07526 | 26.38299 | Pt | 0 | 0 | 0.00000 |
| HETATM | 340 | Pt | 3.62419  | 17.65630 | 26.38356 | Pt | 0 | 0 | 0.00000 |
| HETATM | 341 | Pt | 8.45882  | 26.03315 | 26.37909 | Pt | 0 | 0 | 0.00000 |
| HETATM | 342 | Pt | 8.45978  | 9.28454  | 26.37702 | Pt | 0 | 0 | 0.00000 |
| HETATM | 343 | Pt | 8.46643  | 14.86300 | 26.39841 | Pt | 0 | 0 | 0.00000 |
| HETATM | 344 | Pt | 8.45358  | 20.45414 | 26.37574 | Pt | 0 | 0 | 0.00000 |
| HETATM | 345 | Pt | 13.29293 | 28.82567 | 26.38315 | Pt | 0 | 0 | 0.00000 |
| HETATM | 346 | Pt | 13.29096 | 12.07381 | 26.35073 | Pt | 0 | 0 | 0.00000 |
| HETATM | 347 | Pt | 13.28528 | 17.65547 | 26.38389 | Pt | 0 | 0 | 0.00000 |
| HETATM | 348 | Pt | 13.29228 | 23.23912 | 26.38451 | Pt | 0 | 0 | 0.00000 |
| HETATM | 349 | Pt | 18.12366 | 31.61484 | 26.38526 | Pt | 0 | 0 | 0.00000 |
| HETATM | 350 | Pt | 18.13944 | 14.86259 | 26.36721 | Pt | 0 | 0 | 0.00000 |
| HETATM | 351 | Pt | 18.12556 | 20.44612 | 26.38631 | Pt | 0 | 0 | 0.00000 |
| HETATM | 352 | Pt | 18.12680 | 26.03051 | 26.38291 | Pt | 0 | 0 | 0.00000 |
| HETATM | 353 | Pt | 6.05334  | 21.83796 | 26.38006 | Pt | 0 | 0 | 0.00000 |
| HETATM | 354 | Pt | 6.05611  | 5.09068  | 26.37909 | Pt | 0 | 0 | 0.00000 |
| HETATM | 355 | Pt | 6.05745  | 10.67340 | 26.38315 | Pt | 0 | 0 | 0.00000 |
| HETATM | 356 | Pt | 6.05757  | 16.25152 | 26.38526 | Pt | 0 | 0 | 0.00000 |
| HETATM | 357 | Pt | 10.88970 | 24.63030 | 26.38112 | Pt | 0 | 0 | 0.00000 |
| HETATM | 358 | Pt | 10.88898 | 7.88204  | 26.37702 | Pt | 0 | 0 | 0.00000 |
| HETATM | 359 | Pt | 10.88897 | 13.46060 | 26.35073 | Pt | 0 | 0 | 0.00000 |
| HETATM | 360 | Pt | 10.87988 | 19.05390 | 26.36721 | Pt | 0 | 0 | 0.00000 |
| HETATM | 361 | Pt | 15.72347 | 27.41957 | 26.38299 | Pt | 0 | 0 | 0.00000 |
| HETATM | 362 | Pt | 15.71674 | 10.67703 | 26.39841 | Pt | 0 | 0 | 0.00000 |
| HETATM | 363 | Pt | 15.72567 | 16.24651 | 26.38389 | Pt | 0 | 0 | 0.00000 |
| HETATM | 364 | Pt | 15.72230 | 21.83364 | 26.38631 | Pt | 0 | 0 | 0.00000 |
| HETATM | 365 | Pt | 1.21886  | 19.04501 | 26.38356 | Pt | 0 | 0 | 0.00000 |
| HETATM | 366 | Pt | 1.22717  | 2.29663  | 26.37574 | Pt | 0 | 0 | 0.00000 |
| HETATM | 367 | Pt | 1.21968  | 7.87956  | 26.38451 | Pt | 0 | 0 | 0.00000 |
| HETATM | 368 | Pt | 1.21983  | 13.46207 | 26.38291 | Pt | 0 | 0 | 0.00000 |
| HETATM | 369 | Pt | 6.04655  | 24.62939 | 26.30176 | Pt | 0 | 0 | 0.00000 |

|        |     |    |          |          |          |    |   |   |         |
|--------|-----|----|----------|----------|----------|----|---|---|---------|
| HETATM | 370 | Pt | 6.04689  | 7.88178  | 26.30450 | Pt | 0 | 0 | 0.00000 |
| HETATM | 371 | Pt | 6.04733  | 13.46332 | 26.30966 | Pt | 0 | 0 | 0.00000 |
| HETATM | 372 | Pt | 6.04648  | 19.04459 | 26.30682 | Pt | 0 | 0 | 0.00000 |
| HETATM | 373 | Pt | 10.88059 | 27.42072 | 26.30450 | Pt | 0 | 0 | 0.00000 |
| HETATM | 374 | Pt | 10.88376 | 10.67800 | 26.31810 | Pt | 0 | 0 | 0.00000 |
| HETATM | 375 | Pt | 10.88998 | 16.24758 | 26.32121 | Pt | 0 | 0 | 0.00000 |
| HETATM | 376 | Pt | 10.87754 | 21.84059 | 26.30164 | Pt | 0 | 0 | 0.00000 |
| HETATM | 377 | Pt | 15.71414 | 30.21186 | 26.30966 | Pt | 0 | 0 | 0.00000 |
| HETATM | 378 | Pt | 15.70405 | 13.46817 | 26.32121 | Pt | 0 | 0 | 0.00000 |
| HETATM | 379 | Pt | 15.70995 | 19.03721 | 26.32562 | Pt | 0 | 0 | 0.00000 |
| HETATM | 380 | Pt | 15.71420 | 24.62664 | 26.30722 | Pt | 0 | 0 | 0.00000 |
| HETATM | 381 | Pt | 1.21001  | 21.83692 | 26.30682 | Pt | 0 | 0 | 0.00000 |
| HETATM | 382 | Pt | 1.21589  | 5.08907  | 26.30164 | Pt | 0 | 0 | 0.00000 |
| HETATM | 383 | Pt | 1.21035  | 10.67077 | 26.30722 | Pt | 0 | 0 | 0.00000 |
| HETATM | 384 | Pt | 1.21072  | 16.25349 | 26.30664 | Pt | 0 | 0 | 0.00000 |
| HETATM | 385 | Pt | 2.02805  | 17.66914 | 28.76032 | Pt | 0 | 0 | 0.00000 |
| HETATM | 386 | Pt | 2.03626  | 23.25112 | 28.76029 | Pt | 0 | 0 | 0.00000 |
| HETATM | 387 | Pt | 2.03697  | 6.50818  | 28.76059 | Pt | 0 | 0 | 0.00000 |
| HETATM | 388 | Pt | 2.03164  | 12.08873 | 28.75955 | Pt | 0 | 0 | 0.00000 |
| HETATM | 389 | Pt | 6.85808  | 20.46724 | 28.76029 | Pt | 0 | 0 | 0.00000 |
| HETATM | 390 | Pt | 6.86488  | 26.04678 | 28.75649 | Pt | 0 | 0 | 0.00000 |
| HETATM | 391 | Pt | 6.87080  | 9.30031  | 28.75825 | Pt | 0 | 0 | 0.00000 |
| HETATM | 392 | Pt | 6.87545  | 14.87935 | 28.76715 | Pt | 0 | 0 | 0.00000 |
| HETATM | 393 | Pt | 11.69598 | 23.26122 | 28.76059 | Pt | 0 | 0 | 0.00000 |
| HETATM | 394 | Pt | 11.69713 | 28.84350 | 28.75825 | Pt | 0 | 0 | 0.00000 |
| HETATM | 395 | Pt | 11.68663 | 12.06860 | 28.63378 | Pt | 0 | 0 | 0.00000 |
| HETATM | 396 | Pt | 11.66359 | 17.68690 | 28.69952 | Pt | 0 | 0 | 0.00000 |
| HETATM | 397 | Pt | 16.53155 | 26.04688 | 28.75955 | Pt | 0 | 0 | 0.00000 |
| HETATM | 398 | Pt | 16.52640 | 31.63706 | 28.76715 | Pt | 0 | 0 | 0.00000 |
| HETATM | 399 | Pt | 16.56373 | 14.85781 | 28.69952 | Pt | 0 | 0 | 0.00000 |
| HETATM | 400 | Pt | 16.53188 | 20.46084 | 28.76373 | Pt | 0 | 0 | 0.00000 |
| HETATM | 401 | Pt | 2.02872  | 20.41634 | 28.76086 | Pt | 0 | 0 | 0.00000 |
| HETATM | 402 | Pt | 2.03790  | 3.67028  | 28.75643 | Pt | 0 | 0 | 0.00000 |
| HETATM | 403 | Pt | 2.03161  | 9.25493  | 28.76109 | Pt | 0 | 0 | 0.00000 |
| HETATM | 404 | Pt | 2.03037  | 14.83471 | 28.76031 | Pt | 0 | 0 | 0.00000 |
| HETATM | 405 | Pt | 6.86130  | 23.21398 | 28.75596 | Pt | 0 | 0 | 0.00000 |
| HETATM | 406 | Pt | 6.86435  | 6.46346  | 28.75841 | Pt | 0 | 0 | 0.00000 |
| HETATM | 407 | Pt | 6.87259  | 12.03965 | 28.76574 | Pt | 0 | 0 | 0.00000 |
| HETATM | 408 | Pt | 6.85965  | 17.62641 | 28.76125 | Pt | 0 | 0 | 0.00000 |
| HETATM | 409 | Pt | 11.69902 | 26.00669 | 28.76014 | Pt | 0 | 0 | 0.00000 |
| HETATM | 410 | Pt | 11.68313 | 9.26563  | 28.73718 | Pt | 0 | 0 | 0.00000 |
| HETATM | 411 | Pt | 11.67958 | 14.84415 | 28.75295 | Pt | 0 | 0 | 0.00000 |
| HETATM | 412 | Pt | 11.68417 | 20.43208 | 28.74965 | Pt | 0 | 0 | 0.00000 |
| HETATM | 413 | Pt | 16.53088 | 28.79592 | 28.76165 | Pt | 0 | 0 | 0.00000 |
| HETATM | 414 | Pt | 16.54619 | 12.05866 | 28.76782 | Pt | 0 | 0 | 0.00000 |
| HETATM | 415 | Pt | 16.55450 | 17.61233 | 28.80844 | Pt | 0 | 0 | 0.00000 |
| HETATM | 416 | Pt | 16.53161 | 23.20882 | 28.76139 | Pt | 0 | 0 | 0.00000 |
| HETATM | 417 | Pt | 4.40686  | 19.04332 | 28.76086 | Pt | 0 | 0 | 0.00000 |
| HETATM | 418 | Pt | 4.41340  | 24.62728 | 28.75596 | Pt | 0 | 0 | 0.00000 |
| HETATM | 419 | Pt | 4.41310  | 7.88354  | 28.76014 | Pt | 0 | 0 | 0.00000 |
| HETATM | 420 | Pt | 4.41271  | 13.46267 | 28.76165 | Pt | 0 | 0 | 0.00000 |
| HETATM | 421 | Pt | 9.23783  | 21.84307 | 28.75643 | Pt | 0 | 0 | 0.00000 |
| HETATM | 422 | Pt | 9.24357  | 27.41950 | 28.75841 | Pt | 0 | 0 | 0.00000 |
| HETATM | 423 | Pt | 9.26092  | 10.66409 | 28.73718 | Pt | 0 | 0 | 0.00000 |
| HETATM | 424 | Pt | 9.24823  | 16.27214 | 28.76782 | Pt | 0 | 0 | 0.00000 |
| HETATM | 425 | Pt | 14.07742 | 24.62996 | 28.76109 | Pt | 0 | 0 | 0.00000 |
| HETATM | 426 | Pt | 14.06857 | 30.21473 | 28.76574 | Pt | 0 | 0 | 0.00000 |
| HETATM | 427 | Pt | 14.09384 | 13.45027 | 28.75295 | Pt | 0 | 0 | 0.00000 |
| HETATM | 428 | Pt | 14.05370 | 19.05617 | 28.80844 | Pt | 0 | 0 | 0.00000 |
| HETATM | 429 | Pt | 18.91028 | 27.41877 | 28.76031 | Pt | 0 | 0 | 0.00000 |
| HETATM | 430 | Pt | 18.91332 | 32.99691 | 28.76125 | Pt | 0 | 0 | 0.00000 |
| HETATM | 431 | Pt | 18.93084 | 16.24821 | 28.74965 | Pt | 0 | 0 | 0.00000 |
| HETATM | 432 | Pt | 18.91184 | 21.83459 | 28.76139 | Pt | 0 | 0 | 0.00000 |

|                      |     |    |          |          |          |    |   |   |         |
|----------------------|-----|----|----------|----------|----------|----|---|---|---------|
| HETATM               | 433 | Pt | 4.43309  | 21.83479 | 28.58830 | Pt | 0 | 0 | 0.00000 |
| HETATM               | 434 | Pt | 4.43717  | 5.09031  | 28.58693 | Pt | 0 | 0 | 0.00000 |
| HETATM               | 435 | Pt | 4.43829  | 10.67261 | 28.59050 | Pt | 0 | 0 | 0.00000 |
| HETATM               | 436 | Pt | 4.43559  | 16.25137 | 28.59115 | Pt | 0 | 0 | 0.00000 |
| HETATM               | 437 | Pt | 9.26798  | 24.63092 | 28.58694 | Pt | 0 | 0 | 0.00000 |
| HETATM               | 438 | Pt | 9.26566  | 7.87536  | 28.58380 | Pt | 0 | 0 | 0.00000 |
| HETATM               | 439 | Pt | 9.28278  | 13.44532 | 28.62702 | Pt | 0 | 0 | 0.00000 |
| HETATM               | 440 | Pt | 9.25097  | 19.05851 | 28.58014 | Pt | 0 | 0 | 0.00000 |
| HETATM               | 441 | Pt | 14.10183 | 27.42305 | 28.59050 | Pt | 0 | 0 | 0.00000 |
| HETATM               | 442 | Pt | 14.08082 | 10.67517 | 28.62702 | Pt | 0 | 0 | 0.00000 |
| HETATM               | 443 | Pt | 14.10140 | 16.25111 | 28.66765 | Pt | 0 | 0 | 0.00000 |
| HETATM               | 444 | Pt | 14.09958 | 21.83734 | 28.59520 | Pt | 0 | 0 | 0.00000 |
| HETATM               | 445 | Pt | 18.93453 | 30.21008 | 28.59115 | Pt | 0 | 0 | 0.00000 |
| HETATM               | 446 | Pt | 18.95789 | 13.45421 | 28.58014 | Pt | 0 | 0 | 0.00000 |
| HETATM               | 447 | Pt | 18.94013 | 19.04266 | 28.59520 | Pt | 0 | 0 | 0.00000 |
| HETATM               | 448 | Pt | 18.93701 | 24.62664 | 28.59101 | Pt | 0 | 0 | 0.00000 |
| HETATM               | 449 | O  | 2.82146  | 19.04336 | 29.88022 | O  | 0 | 0 | 0.00000 |
| HETATM               | 450 | O  | 2.83068  | 2.29810  | 29.87740 | O  | 0 | 0 | 0.00000 |
| HETATM               | 451 | O  | 2.82728  | 7.88108  | 29.88026 | O  | 0 | 0 | 0.00000 |
| HETATM               | 452 | O  | 2.82337  | 13.46145 | 29.87941 | O  | 0 | 0 | 0.00000 |
| HETATM               | 453 | O  | 7.65309  | 21.84355 | 29.87740 | O  | 0 | 0 | 0.00000 |
| HETATM               | 454 | O  | 7.65700  | 5.08909  | 29.87740 | O  | 0 | 0 | 0.00000 |
| HETATM               | 455 | O  | 7.66542  | 10.66286 | 29.87350 | O  | 0 | 0 | 0.00000 |
| HETATM               | 456 | O  | 7.65451  | 16.26222 | 29.88472 | O  | 0 | 0 | 0.00000 |
| HETATM               | 457 | O  | 12.48980 | 24.63211 | 29.88027 | O  | 0 | 0 | 0.00000 |
| HETATM               | 458 | O  | 12.47982 | 7.88326  | 29.87350 | O  | 0 | 0 | 0.00000 |
| HETATM               | 459 | O  | 13.31052 | 14.88128 | 29.83071 | O  | 0 | 0 | 0.00000 |
| HETATM               | 460 | O  | 12.43196 | 19.04677 | 29.87097 | O  | 0 | 0 | 0.00000 |
| HETATM               | 461 | O  | 17.32449 | 27.41891 | 29.87941 | O  | 0 | 0 | 0.00000 |
| HETATM               | 462 | O  | 17.33447 | 10.67350 | 29.88473 | O  | 0 | 0 | 0.00000 |
| HETATM               | 463 | O  | 17.35723 | 16.20316 | 29.87097 | O  | 0 | 0 | 0.00000 |
| HETATM               | 464 | O  | 17.32427 | 21.83330 | 29.88077 | O  | 0 | 0 | 0.00000 |
| UNIT ENERGY kcal     |     |    |          |          |          |    |   |   |         |
| ENERGY -58954.651796 |     |    |          |          |          |    |   |   |         |
| END                  |     |    |          |          |          |    |   |   |         |
