# Supplementary material for: Development of a ReaxFF potential for Pt–O systems describing the energetics and dynamics of Pt-oxide formation
Source: Royal Society of Chemistry journal article supplement (doi:10.1039/c4cp03111c), 2014-01-01
Supplement: c4cp03111c1.zip [file c4cp03111c1.zip]

BIOGRF 200  
DESCRP A0276  
REMARK O2\_molecule  
FORMAT ATOM (a6,1x,i5,1x,a5,1x,a3,1x,a1,1x,a5,3f10.5,1x,a5,i3,i2,1x,f8.5)  
HETATM 1 O 0.00000 0.00000 6.08000 O 0 0 0.00000  
HETATM 2 O 0.00000 0.00000 7.32439 O 0 0 0.00000  
UNIT ENERGY kcal  
ENERGY -129.111337  
END
