# Supplementary material for: Development of a ReaxFF potential for Pt–O systems describing the energetics and dynamics of Pt-oxide formation
Source: Royal Society of Chemistry journal article supplement (doi:10.1039/c4cp03111c), 2014-01-01
Supplement: c4cp03111c1.zip [file c4cp03111c1.zip]

113

IS, "bridge"-diffusion ENERGY(Rydberg)= -5934.93724979

|    |               |               |                |
|----|---------------|---------------|----------------|
| Pt | 0.0000000000  | 0.0000000000  | -13.7190560799 |
| Pt | -1.4001952976 | 2.4252093963  | -13.7190560799 |
| Pt | 2.8003905958  | 0.0000000000  | -13.7190560799 |
| Pt | 1.4001952976  | 2.4252093963  | -13.7190560799 |
| Pt | 0.0000000000  | 1.6168062642  | -11.4325467335 |
| Pt | -1.4001952976 | 4.0420156606  | -11.4325467335 |
| Pt | 2.8003905958  | 1.6168062642  | -11.4325467335 |
| Pt | 1.4001952976  | 4.0420156606  | -11.4325467335 |
| Pt | 1.3999894611  | 0.8107467837  | -9.1606550701  |
| Pt | -0.0000963727 | 3.2348872744  | -9.1542992650  |
| Pt | 4.2026887096  | 0.8101371653  | -9.1582975863  |
| Pt | 2.8002058751  | 3.2348476394  | -9.1542737659  |
| Pt | 0.0004228058  | -0.0001741466 | -6.8922205438  |
| Pt | -1.3998288180 | 2.4271996087  | -6.8777256452  |
| Pt | 2.8007565463  | 0.0002512168  | -6.8917300674  |
| Pt | 1.4004529051  | 2.4282912331  | -6.8772308634  |
| Pt | -0.0016493121 | 1.6183896157  | -4.6095620243  |
| Pt | -1.3951469992 | 4.0451694426  | -4.5911697772  |
| Pt | 2.8014405524  | 1.6183797440  | -4.6087753407  |
| Pt | 1.3996312467  | 4.0420839629  | -4.5872248474  |
| Pt | 1.3976878443  | 0.8103888460  | -2.3468875345  |
| Pt | -0.0074358063 | 3.2415908146  | -2.3062495341  |
| Pt | 4.1956569961  | 0.8079141044  | -2.3344397417  |
| Pt | 2.8037985946  | 3.2413675059  | -2.3068337567  |
| Pt | -0.0031100213 | 0.0019581981  | -0.0200447341  |
| Pt | -1.4172015648 | 2.4135259595  | -0.0131593451  |
| Pt | 2.7952139403  | 0.0015015469  | -0.0187389076  |
| Pt | 1.3967057204  | 2.3911784316  | -0.0294962268  |
| Pt | -2.8004007099 | 4.8504363116  | -13.7190560799 |
| Pt | 5.6008014199  | 0.0000000000  | -13.7190560799 |
| Pt | 2.8004007099  | 4.8504363116  | -13.7190560799 |
| Pt | -4.2005960076 | 7.2756457079  | -13.7190560799 |
| Pt | 4.2006061223  | 2.4252093963  | -13.7190560799 |
| Pt | 1.4002054123  | 7.2756457079  | -13.7190560799 |
| Pt | -0.0000101142 | 4.8504363116  | -13.7190560799 |
| Pt | 8.4011920156  | 0.0000000000  | -13.7190560799 |
| Pt | 5.6007913057  | 4.8504363116  | -13.7190560799 |
| Pt | -1.4002054123 | 7.2756457079  | -13.7190560799 |
| Pt | 7.0009967175  | 2.4252093963  | -13.7190560799 |
| Pt | 4.2005960076  | 7.2756457079  | -13.7190560799 |
| Pt | -2.8004007099 | 6.4672425758  | -11.4325467335 |
| Pt | 5.6008014199  | 1.6168062642  | -11.4325467335 |
| Pt | 2.8004007099  | 6.4672425758  | -11.4325467335 |
| Pt | -4.2005960076 | 8.8924519722  | -11.4325467335 |
| Pt | 4.2006061223  | 4.0420156606  | -11.4325467335 |
| Pt | 1.4002054123  | 8.8924519722  | -11.4325467335 |
| Pt | -0.0000101142 | 6.4672425758  | -11.4325467335 |
| Pt | 8.4011920156  | 1.6168062642  | -11.4325467335 |
| Pt | 5.6007913057  | 6.4672425758  | -11.4325467335 |
| Pt | -1.4002054123 | 8.8924519722  | -11.4325467335 |
| Pt | 7.0009967175  | 4.0420156606  | -11.4325467335 |
| Pt | 4.2005960076  | 8.8924519722  | -11.4325467335 |
| Pt | -1.3994025302 | 5.6587034902  | -9.1541327790  |
| Pt | 7.0008552332  | 0.8071056020  | -9.1564185845  |
| Pt | 4.1994500218  | 5.6584364730  | -9.1544924376  |
| Pt | -2.7991672434 | 8.0833637541  | -9.1608968869  |
| Pt | 5.5999276666  | 3.2340654375  | -9.1558709743  |
| Pt | 2.7993162531  | 8.0836442065  | -9.1543325018  |
| Pt | 1.4001546127  | 5.6588832395  | -9.1522817393  |
| Pt | 9.7989294586  | 0.8098797516  | -9.1578775220  |
| Pt | 7.0005595157  | 5.6561900676  | -9.1583252554  |

|    |               |               |               |
|----|---------------|---------------|---------------|
| Pt | 0.0005460450  | 8.0834242208  | -9.1541714993 |
| Pt | 8.4021456435  | 3.2344564216  | -9.1564750996 |
| Pt | 5.5987953785  | 8.0832638785  | -9.1607235322 |
| Pt | -2.7986797846 | 4.8493162326  | -6.8775623815 |
| Pt | 5.6027222666  | -0.0009083800 | -6.8776541771 |
| Pt | 2.7997054393  | 4.8509038607  | -6.8703795083 |
| Pt | -4.2005763333 | 7.2753960228  | -6.8917626659 |
| Pt | 4.2008497544  | 2.4269645177  | -6.8767191243 |
| Pt | 1.4005623104  | 7.2741988044  | -6.8702618285 |
| Pt | 0.0013735317  | 4.8509778082  | -6.8702591962 |
| Pt | 8.3998170163  | -0.0011865122 | -6.8776163625 |
| Pt | 5.5994729646  | 4.8493512820  | -6.8769881654 |
| Pt | -1.3970844066 | 7.2739775962  | -6.8776396182 |
| Pt | 7.0014221905  | 2.4250721856  | -6.8847544388 |
| Pt | 4.1982424975  | 7.2740861827  | -6.8773505453 |
| Pt | -2.7995681664 | 6.4653157430  | -4.6096009181 |
| Pt | 5.6023114735  | 1.6181865265  | -4.6083706114 |
| Pt | 2.8002569870  | 6.4678947548  | -4.5878078841 |
| Pt | -4.2003314099 | 8.8925679357  | -4.6186688786 |
| Pt | 4.1948068082  | 4.0452913883  | -4.5914467762 |
| Pt | 1.4001202747  | 8.8866509130  | -4.5914297518 |
| Pt | -0.0003970501 | 6.4675446131  | -4.5865671204 |
| Pt | 8.3991825748  | 1.6180813228  | -4.6091914738 |
| Pt | 5.6000821507  | 6.4657640670  | -4.6092780966 |
| Pt | -1.3981041269 | 8.8929370819  | -4.6097288189 |
| Pt | 7.0007640023  | 4.0402038603  | -4.6081878930 |
| Pt | 4.1986081022  | 8.8931644445  | -4.6097252409 |
| Pt | -1.3986713163 | 5.6528547177  | -2.3051172719 |
| Pt | 6.9985735752  | 0.8168254449  | -2.3314484643 |
| Pt | 4.1956605234  | 5.6522086461  | -2.3068952578 |
| Pt | -2.8023741340 | 8.0851936006  | -2.3465652736 |
| Pt | 5.6047843345  | 3.2314540471  | -2.3302401170 |
| Pt | 2.7898030432  | 8.0862837016  | -2.3063102050 |
| Pt | 1.3985554972  | 5.6599254920  | -2.2902350842 |
| Pt | 9.8018106402  | 0.8084184384  | -2.3349438645 |
| Pt | 6.9990842881  | 5.6635302880  | -2.3344351769 |
| Pt | 0.0058877209  | 8.0859852576  | -2.3057814476 |
| Pt | 8.3928684523  | 3.2316376739  | -2.3313633472 |
| Pt | 5.5981080118  | 8.0854684664  | -2.3466331846 |
| Pt | -2.8227568209 | 4.8481139800  | -0.0126458659 |
| Pt | 5.5915876187  | 0.0208541375  | -0.0131824404 |
| Pt | 2.8559092775  | 4.8185927608  | 0.0676554244  |
| Pt | -4.2046070849 | 7.2795662155  | -0.0192830616 |
| Pt | 4.2112536132  | 2.4116074992  | -0.0125311254 |
| Pt | 1.3959628309  | 7.3457208628  | 0.0723515298  |
| Pt | -0.0623348494 | 4.8193853883  | 0.0727752437  |
| Pt | 8.4027634582  | 0.0210230744  | -0.0136354500 |
| Pt | 5.6181534006  | 4.8483513751  | -0.0127988223 |
| Pt | -1.4359369454 | 7.2964715547  | -0.0287577448 |
| Pt | 6.9982863941  | 2.4271119485  | -0.0039001156 |
| Pt | 4.2284121865  | 7.2959067525  | -0.0299547418 |
| O  | 1.4003578699  | 5.6591446773  | 1.2736965256  |

113

TS, "bridge"-diffusion ENERGY(Rydberg)= -5934.86675154

|    |               |              |                |
|----|---------------|--------------|----------------|
| Pt | 0.0000000000  | 0.0000000000 | -13.7190560799 |
| Pt | -1.4001952976 | 2.4252093963 | -13.7190560799 |
| Pt | 2.8003905958  | 0.0000000000 | -13.7190560799 |
| Pt | 1.4001952976  | 2.4252093963 | -13.7190560799 |
| Pt | 0.0000000000  | 1.6168062642 | -11.4325467335 |
| Pt | -1.4001952976 | 4.0420156606 | -11.4325467335 |
| Pt | 2.8003905958  | 1.6168062642 | -11.4325467335 |
| Pt | 1.4001952976  | 4.0420156606 | -11.4325467335 |
| Pt | 1.4007900626  | 0.8085587238 | -9.1571337476  |

|    |               |               |                |
|----|---------------|---------------|----------------|
| Pt | 0.0006421142  | 3.2343501849  | -9.1574506386  |
| Pt | 4.2004967299  | 0.8086599369  | -9.1565374234  |
| Pt | 2.7999867759  | 3.2340032990  | -9.1569670641  |
| Pt | 0.0006941396  | 0.0001562899  | -6.8847463242  |
| Pt | -1.4009277244 | 2.4261743578  | -6.8838955269  |
| Pt | 2.8020633736  | -0.0001982336 | -6.8790242674  |
| Pt | 1.4003667888  | 2.4257168141  | -6.8795467158  |
| Pt | -0.0001742932 | 1.6199206747  | -4.6100988475  |
| Pt | -1.3989150581 | 4.0397633922  | -4.6089006693  |
| Pt | 2.8011396695  | 1.6264588060  | -4.6064072787  |
| Pt | 1.4057715386  | 4.0455624729  | -4.5926112731  |
| Pt | 1.3988548224  | 0.8105348494  | -2.3354501064  |
| Pt | 0.0010715723  | 3.2386426212  | -2.3310416994  |
| Pt | 4.1953649705  | 0.8088454027  | -2.2999081517  |
| Pt | 2.8051927928  | 3.2372393274  | -2.2827655831  |
| Pt | -0.0058727454 | 0.0032057767  | -0.0149367629  |
| Pt | -1.4045578079 | 2.4281013969  | -0.0162523262  |
| Pt | 2.7939502918  | -0.0039971322 | 0.0022140160   |
| Pt | 1.3856495244  | 2.3977058142  | -0.0191148168  |
| Pt | -2.8004007099 | 4.8504363116  | -13.7190560799 |
| Pt | 5.6008014199  | 0.0000000000  | -13.7190560799 |
| Pt | 2.8004007099  | 4.8504363116  | -13.7190560799 |
| Pt | -4.2005960076 | 7.2756457079  | -13.7190560799 |
| Pt | 4.2006061223  | 2.4252093963  | -13.7190560799 |
| Pt | 1.4002054123  | 7.2756457079  | -13.7190560799 |
| Pt | -0.0000101142 | 4.8504363116  | -13.7190560799 |
| Pt | 8.4011920156  | 0.0000000000  | -13.7190560799 |
| Pt | 5.6007913057  | 4.8504363116  | -13.7190560799 |
| Pt | -1.4002054123 | 7.2756457079  | -13.7190560799 |
| Pt | 7.0009967175  | 2.4252093963  | -13.7190560799 |
| Pt | 4.2005960076  | 7.2756457079  | -13.7190560799 |
| Pt | -2.8004007099 | 6.4672425758  | -11.4325467335 |
| Pt | 5.6008014199  | 1.6168062642  | -11.4325467335 |
| Pt | 2.8004007099  | 6.4672425758  | -11.4325467335 |
| Pt | -4.2005960076 | 8.8924519722  | -11.4325467335 |
| Pt | 4.2006061223  | 4.0420156606  | -11.4325467335 |
| Pt | 1.4002054123  | 8.8924519722  | -11.4325467335 |
| Pt | -0.0000101142 | 6.4672425758  | -11.4325467335 |
| Pt | 8.4011920156  | 1.6168062642  | -11.4325467335 |
| Pt | 5.6007913057  | 6.4672425758  | -11.4325467335 |
| Pt | -1.4002054123 | 8.8924519722  | -11.4325467335 |
| Pt | 7.0009967175  | 4.0420156606  | -11.4325467335 |
| Pt | 4.2005960076  | 8.8924519722  | -11.4325467335 |
| Pt | -1.4000315353 | 5.6593875536  | -9.1601817786  |
| Pt | 7.0000656049  | 0.8083489270  | -9.1576902345  |
| Pt | 4.2003570328  | 5.6591187977  | -9.1574863972  |
| Pt | -2.7989530794 | 8.0848929784  | -9.1572360612  |
| Pt | 5.5999367802  | 3.2341841782  | -9.1578385785  |
| Pt | 2.8000286847  | 8.0832349807  | -9.1569712785  |
| Pt | 1.4005211416  | 5.6595017971  | -9.1560198423  |
| Pt | 9.8010908581  | 0.8082463576  | -9.1590692063  |
| Pt | 7.0007294671  | 5.6583548244  | -9.1564919301  |
| Pt | 0.0002363960  | 8.0847744081  | -9.1561198620  |
| Pt | 8.4010778028  | 3.2343861036  | -9.1580255138  |
| Pt | 5.6006581223  | 8.0834155516  | -9.1587686515  |
| Pt | -2.8000857389 | 4.8525523684  | -6.8795310581  |
| Pt | 5.6001162791  | -0.0014914291 | -6.8770069758  |
| Pt | 2.8004159134  | 4.8513025045  | -6.8783142299  |
| Pt | -4.1970376763 | 7.2772701931  | -6.8853628487  |
| Pt | 4.2000068578  | 2.4248578253  | -6.8794181349  |
| Pt | 1.4016047368  | 7.2747487416  | -6.8775721183  |
| Pt | -0.0005777647 | 4.8510037091  | -6.8796365733  |
| Pt | 8.4010388059  | -0.0005673631 | -6.8843291133  |

|    |               |              |               |
|----|---------------|--------------|---------------|
| Pt | 5.6001945319  | 4.8509458742 | -6.8793766257 |
| Pt | -1.4005633969 | 7.2759628220 | -6.8788887536 |
| Pt | 7.0013157489  | 2.4243022260 | -6.8845461406 |
| Pt | 4.2017383592  | 7.2759035805 | -6.8791464892 |
| Pt | -2.8007384354 | 6.4687421771 | -4.5990613003 |
| Pt | 5.5968315535  | 1.6172302106 | -4.5989690512 |
| Pt | 2.8068509158  | 6.4622015224 | -4.5919554105 |
| Pt | -4.2011217157 | 8.8955130248 | -4.6089479545 |
| Pt | 4.1988388716  | 4.0431680301 | -4.6026393136 |
| Pt | 1.4024518040  | 8.8927706187 | -4.6074470753 |
| Pt | 0.0080250219  | 6.4644327586 | -4.6064139531 |
| Pt | 8.3982134310  | 1.6173972901 | -4.6088139644 |
| Pt | 5.6018889288  | 6.4640241038 | -4.6100784399 |
| Pt | -1.4007028336 | 8.8974961464 | -4.5954909501 |
| Pt | 6.9997902932  | 4.0385739403 | -4.6094122424 |
| Pt | 4.1987967781  | 8.8937161966 | -4.6120868364 |
| Pt | -1.3994632800 | 5.6652181934 | -2.3376943675 |
| Pt | 6.9953823895  | 0.8105561125 | -2.3276958728 |
| Pt | 4.1972589648  | 5.6501045289 | -2.2868541321 |
| Pt | -2.8034600183 | 8.0895093064 | -2.3268676521 |
| Pt | 5.6006749978  | 3.2370003780 | -2.3268479485 |
| Pt | 2.7944417845  | 8.0847039331 | -2.3346477372 |
| Pt | 1.4158608033  | 5.6531058863 | -2.2982658632 |
| Pt | 9.7975106124  | 0.8109208731 | -2.3355537094 |
| Pt | 7.0014402261  | 5.6650059977 | -2.3389551794 |
| Pt | -0.0064035862 | 8.0859365838 | -2.3349008921 |
| Pt | 8.3991749408  | 3.2381133727 | -2.3323231761 |
| Pt | 5.6012913778  | 8.0859815535 | -2.3439506508 |
| Pt | -2.8018581073 | 4.8539652052 | -0.0108914281 |
| Pt | 5.6061929058  | 0.0010846181 | 0.0053717530  |
| Pt | 2.8118362848  | 4.8737142034 | 0.0971447790  |
| Pt | -4.1963778245 | 7.2851381586 | -0.0131378385 |
| Pt | 4.2219298810  | 2.3965635223 | -0.0054801121 |
| Pt | 1.3766273913  | 7.3120942655 | -0.0303674939 |
| Pt | -0.0379710259 | 4.8605302331 | -0.0316243294 |
| Pt | 8.4006450747  | 0.0122079814 | -0.0138275788 |
| Pt | 5.6434329164  | 4.8554460227 | -0.0262564375 |
| Pt | -1.4098181550 | 7.2857831858 | -0.0081642353 |
| Pt | 7.0076247460  | 2.4256305229 | -0.0069598680 |
| Pt | 4.2181550666  | 7.3133295029 | -0.0384916688 |
| O  | 2.7096164692  | 4.6616199220 | 1.9167104707  |

113

FS, "bridge"-diffusion ENERGY(Rydberg)= -5934.96829753

|    |               |               |                |
|----|---------------|---------------|----------------|
| Pt | 0.0000000000  | 0.0000000000  | -13.7190560799 |
| Pt | -1.4001952976 | 2.4252093963  | -13.7190560799 |
| Pt | 2.8003905958  | 0.0000000000  | -13.7190560799 |
| Pt | 1.4001952976  | 2.4252093963  | -13.7190560799 |
| Pt | 0.0000000000  | 1.6168062642  | -11.4325467335 |
| Pt | -1.4001952976 | 4.0420156606  | -11.4325467335 |
| Pt | 2.8003905958  | 1.6168062642  | -11.4325467335 |
| Pt | 1.4001952976  | 4.0420156606  | -11.4325467335 |
| Pt | 1.4007900626  | 0.8085587238  | -9.1571337476  |
| Pt | 0.0006421142  | 3.2340543475  | -9.1573271622  |
| Pt | 4.2004967299  | 0.8086582490  | -9.1565374234  |
| Pt | 2.8006048910  | 3.2340032990  | -9.1575266021  |
| Pt | 0.0005109049  | -0.0004123028 | -6.8847463242  |
| Pt | -1.4001649106 | 2.4261743578  | -6.8849816081  |
| Pt | 2.8020633736  | -0.0011294525 | -6.8790242674  |
| Pt | 1.3996267226  | 2.4257168141  | -6.8823816642  |
| Pt | -0.0001742932 | 1.6175328437  | -4.6100988475  |
| Pt | -1.4014798453 | 4.0397633922  | -4.6086695039  |
| Pt | 2.8011396695  | 1.6160636647  | -4.6064072787  |
| Pt | 1.3978545249  | 4.0455624729  | -4.6059544783  |

|    |               |               |                |
|----|---------------|---------------|----------------|
| Pt | 1.3990225091  | 0.8092226461  | -2.3363422512  |
| Pt | -0.0032855006 | 3.2386426212  | -2.3362462625  |
| Pt | 4.1979249640  | 0.8313532808  | -2.2999081517  |
| Pt | 2.7995975961  | 3.2372393274  | -2.3250909101  |
| Pt | -0.0075389662 | 0.0048544697  | -0.0131609286  |
| Pt | -1.4029152350 | 2.4226221947  | -0.0134644644  |
| Pt | 2.7823998164  | -0.0258064449 | -0.0098191680  |
| Pt | 1.3657553624  | 2.4103781490  | -0.0379051151  |
| Pt | -2.8004007099 | 4.8504363116  | -13.7190560799 |
| Pt | 5.6008014199  | 0.0000000000  | -13.7190560799 |
| Pt | 2.8004007099  | 4.8504363116  | -13.7190560799 |
| Pt | -4.2005960076 | 7.2756457079  | -13.7190560799 |
| Pt | 4.2006061223  | 2.4252093963  | -13.7190560799 |
| Pt | 1.4002054123  | 7.2756457079  | -13.7190560799 |
| Pt | -0.0000101142 | 4.8504363116  | -13.7190560799 |
| Pt | 8.4011920156  | 0.0000000000  | -13.7190560799 |
| Pt | 5.6007913057  | 4.8504363116  | -13.7190560799 |
| Pt | -1.4002054123 | 7.2756457079  | -13.7190560799 |
| Pt | 7.0009967175  | 2.4252093963  | -13.7190560799 |
| Pt | 4.2005960076  | 7.2756457079  | -13.7190560799 |
| Pt | -2.8004007099 | 6.4672425758  | -11.4325467335 |
| Pt | 5.6008014199  | 1.6168062642  | -11.4325467335 |
| Pt | 2.8004007099  | 6.4672425758  | -11.4325467335 |
| Pt | -4.2005960076 | 8.8924519722  | -11.4325467335 |
| Pt | 4.2006061223  | 4.0420156606  | -11.4325467335 |
| Pt | 1.4002054123  | 8.8924519722  | -11.4325467335 |
| Pt | -0.0000101142 | 6.4672425758  | -11.4325467335 |
| Pt | 8.4011920156  | 1.6168062642  | -11.4325467335 |
| Pt | 5.6007913057  | 6.4672425758  | -11.4325467335 |
| Pt | -1.4002054123 | 8.8924519722  | -11.4325467335 |
| Pt | 7.0009967175  | 4.0420156606  | -11.4325467335 |
| Pt | 4.2005960076  | 8.8924519722  | -11.4325467335 |
| Pt | -1.4000315353 | 5.6571767767  | -9.1601817786  |
| Pt | 7.0006046694  | 0.8083489270  | -9.1576289908  |
| Pt | 4.2003570328  | 5.6584404523  | -9.1574863972  |
| Pt | -2.8020326145 | 8.0848929784  | -9.1603986949  |
| Pt | 5.5999367802  | 3.2340415039  | -9.1578385785  |
| Pt | 2.8003720009  | 8.0832349807  | -9.1574012698  |
| Pt | 1.4005211416  | 5.6586449394  | -9.1560198423  |
| Pt | 9.8016920593  | 0.8082463576  | -9.1590049637  |
| Pt | 7.0007294671  | 5.6587284814  | -9.1564919301  |
| Pt | 0.0014921400  | 8.0847744081  | -9.1602981625  |
| Pt | 8.4010778028  | 3.2339377442  | -9.1575249293  |
| Pt | 5.6009419052  | 8.0834155516  | -9.1573658935  |
| Pt | -2.8000857389 | 4.8529937053  | -6.8795310581  |
| Pt | 5.5986809228  | -0.0014914291 | -6.8796032724  |
| Pt | 2.8004159134  | 4.8504032012  | -6.8783142299  |
| Pt | -4.1987151049 | 7.2746110892  | -6.8790332923  |
| Pt | 4.2000068578  | 2.4255162511  | -6.8794181349  |
| Pt | 1.3975457792  | 7.2747487416  | -6.8791388738  |
| Pt | -0.0005777647 | 4.8531501276  | -6.8789190771  |
| Pt | 8.4004622223  | -0.0005673631 | -6.8848619032  |
| Pt | 5.6001945319  | 4.8507446576  | -6.8793766257  |
| Pt | -1.4007067607 | 7.2759628220  | -6.8943819784  |
| Pt | 7.0013157489  | 2.4250479317  | -6.8845461406  |
| Pt | 4.1999410860  | 7.2759035805  | -6.8824144461  |
| Pt | -2.8007384354 | 6.4682456586  | -4.5990613003  |
| Pt | 5.5971596515  | 1.6163567023  | -4.6084292965  |
| Pt | 2.7960872286  | 6.4675457195  | -4.6061398055  |
| Pt | -4.2036994682 | 8.8944855777  | -4.6089479545  |
| Pt | 4.1988388716  | 4.0431680301  | -4.6026393136  |
| Pt | 1.4014433744  | 8.8947633500  | -4.6089697854  |
| Pt | -0.0021755586 | 6.4686614157  | -4.5982792735  |

|    |               |               |               |
|----|---------------|---------------|---------------|
| Pt | 8.3986569407  | 1.6183142110  | -4.6114013422 |
| Pt | 5.6018889288  | 6.4671158633  | -4.6065926116 |
| Pt | -1.4012854876 | 8.8924606805  | -4.5991288908 |
| Pt | 6.9997193272  | 4.0456090278  | -4.6085034727 |
| Pt | 4.1995695835  | 8.8922904847  | -4.6099412071 |
| Pt | -1.4031772608 | 5.6644128064  | -2.3311256936 |
| Pt | 6.9951305368  | 0.8088527062  | -2.3373012803 |
| Pt | 4.1972589648  | 5.6582239884  | -2.3251066866 |
| Pt | -2.8001784930 | 8.0842989393  | -2.3324519422 |
| Pt | 5.5958791644  | 3.2370003780  | -2.3268479485 |
| Pt | 2.7944417845  | 8.0847039331  | -2.3360754687 |
| Pt | 1.4143967257  | 5.6508396856  | -2.2982658632 |
| Pt | 9.7975106124  | 0.8109208731  | -2.3336207075 |
| Pt | 6.9800628515  | 5.6503308857  | -2.3000670664 |
| Pt | -0.0060301875 | 8.0843312596  | -2.3309802273 |
| Pt | 8.3980982877  | 3.2389111199  | -2.3372169653 |
| Pt | 5.6000992362  | 8.0851811335  | -2.3363112005 |
| Pt | -2.7717998223 | 4.8543692316  | -0.0090992286 |
| Pt | 5.6125084041  | -0.0259129409 | -0.0090689654 |
| Pt | 2.7096164692  | 4.9034301158  | 0.0104406369  |
| Pt | -4.1869047213 | 7.3051205561  | -0.0102116459 |
| Pt | 4.1986710454  | 2.3269746020  | 0.0072261606  |
| Pt | 1.3794792854  | 7.3051108411  | -0.0078269568 |
| Pt | -0.0353852142 | 4.8544698815  | -0.0077014686 |
| Pt | 8.4027989002  | 0.0047523057  | -0.0136748155 |
| Pt | 5.6854401377  | 4.9021758174  | 0.0074920914  |
| Pt | -1.4043148964 | 7.2786523592  | 0.0056217145  |
| Pt | 7.0307739698  | 2.4086803533  | -0.0394251029 |
| Pt | 4.1968908839  | 7.3137306815  | -0.0384916688 |
| O  | 4.1984401693  | 4.0436728671  | 1.1503513514  |
