# Supplementary material for: Development of a ReaxFF potential for Pt–O systems describing the energetics and dynamics of Pt-oxide formation
Source: Royal Society of Chemistry journal article supplement (doi:10.1039/c4cp03111c), 2014-01-01
Supplement: c4cp03111c1.zip [file c4cp03111c1.zip]

```

XTLGRF 200
DESCRP A0080
REMARK Pt111_clean_1x1x14_30.0_vac
FIXATOMS      7      8
CRYSTX      2.79121      2.79121      59.62720      90.00000      90.00000      60.00000
FORMAT ATOM      (a6,1x,i5,1x,a5,1x,a3,1x,a1,1x,a5,3f10.5,1x,a5,i3,i2,1x,f8.5)
HETATM      1 Pt      -0.00000      0.00000      -0.00117      Pt      1 0      0.00000
HETATM      2 Pt      0.80575      1.39561      2.28018      Pt      1 0      0.00000
HETATM      3 Pt      1.61151      2.79121      4.55805      Pt      1 0      0.00000
HETATM      4 Pt      0.00000      0.00000      6.83705      Pt      1 0      0.00000
HETATM      5 Pt      0.80575      1.39561      9.11606      Pt      1 0      0.00000
HETATM      6 Pt      1.61151      2.79121      11.39508      Pt      1 0      0.00000
HETATM      7 Pt      0.00000      0.00000      13.67409      Pt      1 0      0.00000
HETATM      8 Pt      0.80575      1.39561      15.95311      Pt      1 0      0.00000
HETATM      9 Pt      1.61151      2.79121      18.23212      Pt      1 0      0.00000
HETATM     10 Pt      0.00000      0.00000      20.51114      Pt      1 0      0.00000
HETATM     11 Pt      0.80575      1.39561      22.79015      Pt      1 0      0.00000
HETATM     12 Pt      1.61151      2.79121      25.06915      Pt      1 0      0.00000
HETATM     13 Pt      0.00000      0.00000      27.34702      Pt      1 0      0.00000
HETATM     14 Pt      0.80575      1.39561      29.62837      Pt      1 0      0.00000
UNIT ENERGY      kcal
ENERGY      -1830.353178
END

```

```

XTLGRF 200
DESCRP A0050
REMARK Pt111_0.11ML_3x3x14_30.0_vac
FIXATOMS     55     72
CRYSTX      8.37364      8.37364      59.62720      90.00000      90.00000      60.00000
FORMAT ATOM      (a6,1x,i5,1x,a5,1x,a3,1x,a1,1x,a5,3f10.5,1x,a5,i3,i2,1x,f8.5)
HETATM      1 Pt      -0.00942      -0.01631      0.01711      Pt      1 0      0.00000
HETATM      2 Pt      0.01171      2.79121      -0.08297      Pt      1 0      0.00000
HETATM      3 Pt      -0.00942      5.59873      0.01711      Pt      1 0      0.00000
HETATM      4 Pt      2.41140      1.40575      -0.08297      Pt      1 0      0.00000
HETATM      5 Pt      2.41140      4.17667      -0.08297      Pt      1 0      0.00000
HETATM      6 Pt      2.40638      6.97803      -0.03628      Pt      1 0      0.00000
HETATM      7 Pt      4.85335      2.79121      0.01711      Pt      1 0      0.00000
HETATM      8 Pt      4.83996      5.57300      -0.03628      Pt      1 0      0.00000
HETATM      9 Pt      4.83996      8.38306      -0.03628      Pt      1 0      0.00000
HETATM     10 Pt      0.80788      1.39929      2.25508      Pt      1 0      0.00000
HETATM     11 Pt      0.80788      4.18313      2.25508      Pt      1 0      0.00000
HETATM     12 Pt      0.80898      6.97803      2.28406      Pt      1 0      0.00000
HETATM     13 Pt      3.21876      2.79121      2.25508      Pt      1 0      0.00000
HETATM     14 Pt      3.22730      5.58985      2.28660      Pt      1 0      0.00000
HETATM     15 Pt      3.22730      8.36621      2.28660      Pt      1 0      0.00000
HETATM     16 Pt      5.63866      4.18961      2.28406      Pt      1 0      0.00000
HETATM     17 Pt      5.63170      6.97803      2.28660      Pt      1 0      0.00000
HETATM     18 Pt      5.63866      9.76645      2.28406      Pt      1 0      0.00000
HETATM     19 Pt      1.61151      2.79121      4.54447      Pt      1 0      0.00000
HETATM     20 Pt      1.60984      5.58042      4.55459      Pt      1 0      0.00000
HETATM     21 Pt      1.60984      8.37564      4.55459      Pt      1 0      0.00000
HETATM     22 Pt      4.02786      4.18438      4.55459      Pt      1 0      0.00000
HETATM     23 Pt      4.02877      6.97803      4.56453      Pt      1 0      0.00000
HETATM     24 Pt      4.02786      9.77168      4.55459      Pt      1 0      0.00000
HETATM     25 Pt      6.44859      5.58199      4.55459      Pt      1 0      0.00000
HETATM     26 Pt      6.44859      8.37408      4.55459      Pt      1 0      0.00000
HETATM     27 Pt      6.44603      11.16485      4.56012      Pt      1 0      0.00000
HETATM     28 Pt      0.00007      0.00012      6.83691      Pt      1 0      0.00000
HETATM     29 Pt      0.00094      2.79121      6.83217      Pt      1 0      0.00000
HETATM     30 Pt      0.00007      5.58230      6.83691      Pt      1 0      0.00000
HETATM     31 Pt      2.41679      1.39642      6.83217      Pt      1 0      0.00000
HETATM     32 Pt      2.41679      4.18600      6.83217      Pt      1 0      0.00000
HETATM     33 Pt      2.41598      6.97803      6.83584      Pt      1 0      0.00000

```

|        |    |    |         |          |          |    |   |   |         |
|--------|----|----|---------|----------|----------|----|---|---|---------|
| HETATM | 34 | Pt | 4.83438 | 2.79121  | 6.83691  | Pt | 1 | 0 | 0.00000 |
| HETATM | 35 | Pt | 4.83516 | 5.58132  | 6.83584  | Pt | 1 | 0 | 0.00000 |
| HETATM | 36 | Pt | 4.83516 | 8.37474  | 6.83584  | Pt | 1 | 0 | 0.00000 |
| HETATM | 37 | Pt | 0.80601 | 1.39605  | 9.11386  | Pt | 1 | 0 | 0.00000 |
| HETATM | 38 | Pt | 0.80601 | 4.18637  | 9.11386  | Pt | 1 | 0 | 0.00000 |
| HETATM | 39 | Pt | 0.80568 | 6.97803  | 9.11608  | Pt | 1 | 0 | 0.00000 |
| HETATM | 40 | Pt | 3.22250 | 2.79121  | 9.11386  | Pt | 1 | 0 | 0.00000 |
| HETATM | 41 | Pt | 3.22274 | 5.58196  | 9.11348  | Pt | 1 | 0 | 0.00000 |
| HETATM | 42 | Pt | 3.22274 | 8.37410  | 9.11348  | Pt | 1 | 0 | 0.00000 |
| HETATM | 43 | Pt | 5.64031 | 4.18676  | 9.11608  | Pt | 1 | 0 | 0.00000 |
| HETATM | 44 | Pt | 5.64081 | 6.97803  | 9.11348  | Pt | 1 | 0 | 0.00000 |
| HETATM | 45 | Pt | 5.64031 | 9.76931  | 9.11608  | Pt | 1 | 0 | 0.00000 |
| HETATM | 46 | Pt | 1.61151 | 2.79121  | 11.39423 | Pt | 1 | 0 | 0.00000 |
| HETATM | 47 | Pt | 1.61165 | 5.58220  | 11.39414 | Pt | 1 | 0 | 0.00000 |
| HETATM | 48 | Pt | 1.61165 | 8.37386  | 11.39414 | Pt | 1 | 0 | 0.00000 |
| HETATM | 49 | Pt | 4.02850 | 4.18683  | 11.39414 | Pt | 1 | 0 | 0.00000 |
| HETATM | 50 | Pt | 4.02877 | 6.97803  | 11.39303 | Pt | 1 | 0 | 0.00000 |
| HETATM | 51 | Pt | 4.02850 | 9.76923  | 11.39414 | Pt | 1 | 0 | 0.00000 |
| HETATM | 52 | Pt | 6.44615 | 5.58266  | 11.39414 | Pt | 1 | 0 | 0.00000 |
| HETATM | 53 | Pt | 6.44615 | 8.37340  | 11.39414 | Pt | 1 | 0 | 0.00000 |
| HETATM | 54 | Pt | 6.44603 | 11.16485 | 11.39519 | Pt | 1 | 0 | 0.00000 |
| HETATM | 55 | Pt | 0.00000 | 0.00000  | 13.67409 | Pt | 1 | 0 | 0.00000 |
| HETATM | 56 | Pt | 0.00000 | 2.79121  | 13.67409 | Pt | 1 | 0 | 0.00000 |
| HETATM | 57 | Pt | 0.00000 | 5.58242  | 13.67409 | Pt | 1 | 0 | 0.00000 |
| HETATM | 58 | Pt | 2.41726 | 1.39561  | 13.67409 | Pt | 1 | 0 | 0.00000 |
| HETATM | 59 | Pt | 2.41726 | 4.18682  | 13.67409 | Pt | 1 | 0 | 0.00000 |
| HETATM | 60 | Pt | 2.41726 | 6.97803  | 13.67409 | Pt | 1 | 0 | 0.00000 |
| HETATM | 61 | Pt | 4.83452 | 2.79121  | 13.67409 | Pt | 1 | 0 | 0.00000 |
| HETATM | 62 | Pt | 4.83452 | 5.58242  | 13.67409 | Pt | 1 | 0 | 0.00000 |
| HETATM | 63 | Pt | 4.83452 | 8.37364  | 13.67409 | Pt | 1 | 0 | 0.00000 |
| HETATM | 64 | Pt | 0.80575 | 1.39561  | 15.95311 | Pt | 1 | 0 | 0.00000 |
| HETATM | 65 | Pt | 0.80575 | 4.18682  | 15.95311 | Pt | 1 | 0 | 0.00000 |
| HETATM | 66 | Pt | 0.80575 | 6.97803  | 15.95311 | Pt | 1 | 0 | 0.00000 |
| HETATM | 67 | Pt | 3.22301 | 2.79121  | 15.95311 | Pt | 1 | 0 | 0.00000 |
| HETATM | 68 | Pt | 3.22301 | 5.58242  | 15.95311 | Pt | 1 | 0 | 0.00000 |
| HETATM | 69 | Pt | 3.22301 | 8.37364  | 15.95311 | Pt | 1 | 0 | 0.00000 |
| HETATM | 70 | Pt | 5.64027 | 4.18682  | 15.95311 | Pt | 1 | 0 | 0.00000 |
| HETATM | 71 | Pt | 5.64027 | 6.97803  | 15.95311 | Pt | 1 | 0 | 0.00000 |
| HETATM | 72 | Pt | 5.64027 | 9.76924  | 15.95311 | Pt | 1 | 0 | 0.00000 |
| HETATM | 73 | Pt | 1.61150 | 2.79121  | 18.23297 | Pt | 1 | 0 | 0.00000 |
| HETATM | 74 | Pt | 1.61136 | 5.58220  | 18.23306 | Pt | 1 | 0 | 0.00000 |
| HETATM | 75 | Pt | 1.61136 | 8.37386  | 18.23306 | Pt | 1 | 0 | 0.00000 |
| HETATM | 76 | Pt | 4.02864 | 4.18658  | 18.23306 | Pt | 1 | 0 | 0.00000 |
| HETATM | 77 | Pt | 4.02876 | 6.97803  | 18.23201 | Pt | 1 | 0 | 0.00000 |
| HETATM | 78 | Pt | 4.02864 | 9.76948  | 18.23306 | Pt | 1 | 0 | 0.00000 |
| HETATM | 79 | Pt | 6.44630 | 5.58241  | 18.23306 | Pt | 1 | 0 | 0.00000 |
| HETATM | 80 | Pt | 6.44630 | 8.37365  | 18.23306 | Pt | 1 | 0 | 0.00000 |
| HETATM | 81 | Pt | 6.44603 | 11.16485 | 18.23417 | Pt | 1 | 0 | 0.00000 |
| HETATM | 82 | Pt | 0.00027 | 0.00046  | 20.51372 | Pt | 1 | 0 | 0.00000 |
| HETATM | 83 | Pt | 0.00051 | 2.79121  | 20.51334 | Pt | 1 | 0 | 0.00000 |
| HETATM | 84 | Pt | 0.00027 | 5.58196  | 20.51372 | Pt | 1 | 0 | 0.00000 |
| HETATM | 85 | Pt | 2.41700 | 1.39605  | 20.51334 | Pt | 1 | 0 | 0.00000 |
| HETATM | 86 | Pt | 2.41700 | 4.18637  | 20.51334 | Pt | 1 | 0 | 0.00000 |
| HETATM | 87 | Pt | 2.41733 | 6.97803  | 20.51112 | Pt | 1 | 0 | 0.00000 |
| HETATM | 88 | Pt | 4.83398 | 2.79121  | 20.51372 | Pt | 1 | 0 | 0.00000 |
| HETATM | 89 | Pt | 4.83449 | 5.58249  | 20.51112 | Pt | 1 | 0 | 0.00000 |
| HETATM | 90 | Pt | 4.83449 | 8.37358  | 20.51112 | Pt | 1 | 0 | 0.00000 |
| HETATM | 91 | Pt | 0.80622 | 1.39642  | 22.79503 | Pt | 1 | 0 | 0.00000 |
| HETATM | 92 | Pt | 0.80622 | 4.18600  | 22.79503 | Pt | 1 | 0 | 0.00000 |
| HETATM | 93 | Pt | 0.80703 | 6.97803  | 22.79136 | Pt | 1 | 0 | 0.00000 |
| HETATM | 94 | Pt | 3.22207 | 2.79121  | 22.79503 | Pt | 1 | 0 | 0.00000 |
| HETATM | 95 | Pt | 3.22294 | 5.58230  | 22.79029 | Pt | 1 | 0 | 0.00000 |
| HETATM | 96 | Pt | 3.22294 | 8.37376  | 22.79029 | Pt | 1 | 0 | 0.00000 |

|        |     |    |          |          |          |    |   |   |         |
|--------|-----|----|----------|----------|----------|----|---|---|---------|
| HETATM | 97  | Pt | 5.63964  | 4.18792  | 22.79136 | Pt | 1 | 0 | 0.00000 |
| HETATM | 98  | Pt | 5.64042  | 6.97803  | 22.79029 | Pt | 1 | 0 | 0.00000 |
| HETATM | 99  | Pt | 5.63964  | 9.76814  | 22.79136 | Pt | 1 | 0 | 0.00000 |
| HETATM | 100 | Pt | 1.61151  | 2.79121  | 25.08273 | Pt | 1 | 0 | 0.00000 |
| HETATM | 101 | Pt | 1.61317  | 5.58042  | 25.07261 | Pt | 1 | 0 | 0.00000 |
| HETATM | 102 | Pt | 1.61317  | 8.37564  | 25.07261 | Pt | 1 | 0 | 0.00000 |
| HETATM | 103 | Pt | 4.02620  | 4.18726  | 25.07261 | Pt | 1 | 0 | 0.00000 |
| HETATM | 104 | Pt | 4.02877  | 6.97803  | 25.06708 | Pt | 1 | 0 | 0.00000 |
| HETATM | 105 | Pt | 4.02620  | 9.76881  | 25.07261 | Pt | 1 | 0 | 0.00000 |
| HETATM | 106 | Pt | 6.44693  | 5.58486  | 25.07261 | Pt | 1 | 0 | 0.00000 |
| HETATM | 107 | Pt | 6.44693  | 8.37120  | 25.07261 | Pt | 1 | 0 | 0.00000 |
| HETATM | 108 | Pt | 6.44603  | 11.16485 | 25.06267 | Pt | 1 | 0 | 0.00000 |
| HETATM | 109 | Pt | -0.00429 | -0.00743 | 27.34060 | Pt | 1 | 0 | 0.00000 |
| HETATM | 110 | Pt | 0.00425  | 2.79121  | 27.37212 | Pt | 1 | 0 | 0.00000 |
| HETATM | 111 | Pt | -0.00429 | 5.58985  | 27.34060 | Pt | 1 | 0 | 0.00000 |
| HETATM | 112 | Pt | 2.41513  | 1.39929  | 27.37212 | Pt | 1 | 0 | 0.00000 |
| HETATM | 113 | Pt | 2.41513  | 4.18313  | 27.37212 | Pt | 1 | 0 | 0.00000 |
| HETATM | 114 | Pt | 2.41403  | 6.97803  | 27.34314 | Pt | 1 | 0 | 0.00000 |
| HETATM | 115 | Pt | 4.84310  | 2.79121  | 27.34060 | Pt | 1 | 0 | 0.00000 |
| HETATM | 116 | Pt | 4.83613  | 5.57963  | 27.34314 | Pt | 1 | 0 | 0.00000 |
| HETATM | 117 | Pt | 4.83613  | 8.37643  | 27.34314 | Pt | 1 | 0 | 0.00000 |
| HETATM | 118 | Pt | 0.81161  | 1.40575  | 29.71017 | Pt | 1 | 0 | 0.00000 |
| HETATM | 119 | Pt | 0.81161  | 4.17667  | 29.71017 | Pt | 1 | 0 | 0.00000 |
| HETATM | 120 | Pt | 0.81663  | 6.97803  | 29.66348 | Pt | 1 | 0 | 0.00000 |
| HETATM | 121 | Pt | 3.21130  | 2.79121  | 29.71017 | Pt | 1 | 0 | 0.00000 |
| HETATM | 122 | Pt | 3.23243  | 5.59873  | 29.61009 | Pt | 1 | 0 | 0.00000 |
| HETATM | 123 | Pt | 3.23243  | 8.35733  | 29.61009 | Pt | 1 | 0 | 0.00000 |
| HETATM | 124 | Pt | 5.63483  | 4.19624  | 29.66348 | Pt | 1 | 0 | 0.00000 |
| HETATM | 125 | Pt | 5.62145  | 6.97803  | 29.61009 | Pt | 1 | 0 | 0.00000 |
| HETATM | 126 | Pt | 5.63483  | 9.75982  | 29.66348 | Pt | 1 | 0 | 0.00000 |
| HETATM | 127 | O  | 1.61151  | 2.79121  | 30.82998 | O  | 1 | 0 | 0.00000 |
| HETATM | 128 | O  | 1.61151  | 2.79121  | -1.20278 | O  | 1 | 0 | 0.00000 |

UNIT ENERGY kcal  
ENERGY -16648.546290  
END

XTLGRF 200  
DESCRP A0014  
REMARK Pt111\_0.25ML\_2x2x14\_30.0\_vac  
FIXATOMS 25 32  
CRYSTX 5.58242 5.58242 59.62720 90.00000 90.00000 60.00000  
FORMAT ATOM (a6,1x,i5,1x,a5,1x,a3,1x,a1,1x,a5,3f10.5,1x,a5,i3,i2,1x,f8.5)  

|        |    |    |         |         |          |    |   |   |         |
|--------|----|----|---------|---------|----------|----|---|---|---------|
| HETATM | 1  | Pt | 0.00000 | 0.00000 | 0.04665  | Pt | 1 | 0 | 0.00000 |
| HETATM | 2  | Pt | 0.02539 | 2.79121 | -0.12271 | Pt | 1 | 0 | 0.00000 |
| HETATM | 3  | Pt | 2.40456 | 1.41760 | -0.12271 | Pt | 1 | 0 | 0.00000 |
| HETATM | 4  | Pt | 2.40456 | 4.16483 | -0.12271 | Pt | 1 | 0 | 0.00000 |
| HETATM | 5  | Pt | 0.81031 | 1.40350 | 2.25522  | Pt | 1 | 0 | 0.00000 |
| HETATM | 6  | Pt | 0.81031 | 4.17893 | 2.25522  | Pt | 1 | 0 | 0.00000 |
| HETATM | 7  | Pt | 3.21390 | 2.79121 | 2.25522  | Pt | 1 | 0 | 0.00000 |
| HETATM | 8  | Pt | 3.22301 | 5.58242 | 2.33175  | Pt | 1 | 0 | 0.00000 |
| HETATM | 9  | Pt | 1.61151 | 2.79121 | 4.54638  | Pt | 1 | 0 | 0.00000 |
| HETATM | 10 | Pt | 1.60536 | 5.58242 | 4.55888  | Pt | 1 | 0 | 0.00000 |
| HETATM | 11 | Pt | 4.03184 | 4.18149 | 4.55888  | Pt | 1 | 0 | 0.00000 |
| HETATM | 12 | Pt | 4.03184 | 6.98335 | 4.55888  | Pt | 1 | 0 | 0.00000 |
| HETATM | 13 | Pt | 0.00000 | 0.00000 | 6.83995  | Pt | 1 | 0 | 0.00000 |
| HETATM | 14 | Pt | 0.00085 | 2.79121 | 6.83408  | Pt | 1 | 0 | 0.00000 |
| HETATM | 15 | Pt | 2.41683 | 1.39635 | 6.83407  | Pt | 1 | 0 | 0.00000 |
| HETATM | 16 | Pt | 2.41683 | 4.18608 | 6.83407  | Pt | 1 | 0 | 0.00000 |
| HETATM | 17 | Pt | 0.80597 | 1.39598 | 9.11560  | Pt | 1 | 0 | 0.00000 |
| HETATM | 18 | Pt | 0.80597 | 4.18644 | 9.11560  | Pt | 1 | 0 | 0.00000 |
| HETATM | 19 | Pt | 3.22258 | 2.79121 | 9.11560  | Pt | 1 | 0 | 0.00000 |
| HETATM | 20 | Pt | 3.22301 | 5.58242 | 9.11379  | Pt | 1 | 0 | 0.00000 |
| HETATM | 21 | Pt | 1.61151 | 2.79121 | 11.39494 | Pt | 1 | 0 | 0.00000 |

|        |    |    |         |         |          |    |   |   |         |
|--------|----|----|---------|---------|----------|----|---|---|---------|
| HETATM | 22 | Pt | 1.61163 | 5.58242 | 11.39431 | Pt | 1 | 0 | 0.00000 |
| HETATM | 23 | Pt | 4.02870 | 4.18693 | 11.39431 | Pt | 1 | 0 | 0.00000 |
| HETATM | 24 | Pt | 4.02870 | 6.97792 | 11.39431 | Pt | 1 | 0 | 0.00000 |
| HETATM | 25 | Pt | 0.00000 | 0.00000 | 13.67409 | Pt | 1 | 0 | 0.00000 |
| HETATM | 26 | Pt | 0.00000 | 2.79121 | 13.67409 | Pt | 1 | 0 | 0.00000 |
| HETATM | 27 | Pt | 2.41726 | 1.39561 | 13.67409 | Pt | 1 | 0 | 0.00000 |
| HETATM | 28 | Pt | 2.41726 | 4.18682 | 13.67409 | Pt | 1 | 0 | 0.00000 |
| HETATM | 29 | Pt | 0.80575 | 1.39561 | 15.95311 | Pt | 1 | 0 | 0.00000 |
| HETATM | 30 | Pt | 0.80575 | 4.18682 | 15.95311 | Pt | 1 | 0 | 0.00000 |
| HETATM | 31 | Pt | 3.22301 | 2.79121 | 15.95311 | Pt | 1 | 0 | 0.00000 |
| HETATM | 32 | Pt | 3.22301 | 5.58242 | 15.95311 | Pt | 1 | 0 | 0.00000 |
| HETATM | 33 | Pt | 1.61151 | 2.79121 | 18.23226 | Pt | 1 | 0 | 0.00000 |
| HETATM | 34 | Pt | 1.61138 | 5.58242 | 18.23289 | Pt | 1 | 0 | 0.00000 |
| HETATM | 35 | Pt | 4.02883 | 4.18671 | 18.23289 | Pt | 1 | 0 | 0.00000 |
| HETATM | 36 | Pt | 4.02883 | 6.97814 | 18.23289 | Pt | 1 | 0 | 0.00000 |
| HETATM | 37 | Pt | 0.00000 | 0.00000 | 20.51341 | Pt | 1 | 0 | 0.00000 |
| HETATM | 38 | Pt | 0.00043 | 2.79121 | 20.51160 | Pt | 1 | 0 | 0.00000 |
| HETATM | 39 | Pt | 2.41704 | 1.39598 | 20.51160 | Pt | 1 | 0 | 0.00000 |
| HETATM | 40 | Pt | 2.41704 | 4.18644 | 20.51160 | Pt | 1 | 0 | 0.00000 |
| HETATM | 41 | Pt | 0.80618 | 1.39635 | 22.79312 | Pt | 1 | 0 | 0.00000 |
| HETATM | 42 | Pt | 0.80618 | 4.18608 | 22.79312 | Pt | 1 | 0 | 0.00000 |
| HETATM | 43 | Pt | 3.22216 | 2.79121 | 22.79312 | Pt | 1 | 0 | 0.00000 |
| HETATM | 44 | Pt | 3.22301 | 5.58242 | 22.78725 | Pt | 1 | 0 | 0.00000 |
| HETATM | 45 | Pt | 1.61151 | 2.79121 | 25.08082 | Pt | 1 | 0 | 0.00000 |
| HETATM | 46 | Pt | 1.61765 | 5.58242 | 25.06832 | Pt | 1 | 0 | 0.00000 |
| HETATM | 47 | Pt | 4.02569 | 4.19214 | 25.06832 | Pt | 1 | 0 | 0.00000 |
| HETATM | 48 | Pt | 4.02569 | 6.97270 | 25.06832 | Pt | 1 | 0 | 0.00000 |
| HETATM | 49 | Pt | 0.00000 | 0.00000 | 27.29545 | Pt | 1 | 0 | 0.00000 |
| HETATM | 50 | Pt | 0.00911 | 2.79121 | 27.37198 | Pt | 1 | 0 | 0.00000 |
| HETATM | 51 | Pt | 2.41270 | 1.40350 | 27.37198 | Pt | 1 | 0 | 0.00000 |
| HETATM | 52 | Pt | 2.41270 | 4.17893 | 27.37198 | Pt | 1 | 0 | 0.00000 |
| HETATM | 53 | Pt | 0.81845 | 1.41760 | 29.74991 | Pt | 1 | 0 | 0.00000 |
| HETATM | 54 | Pt | 0.81845 | 4.16483 | 29.74991 | Pt | 1 | 0 | 0.00000 |
| HETATM | 55 | Pt | 3.19762 | 2.79121 | 29.74991 | Pt | 1 | 0 | 0.00000 |
| HETATM | 56 | Pt | 3.22301 | 5.58242 | 29.58055 | Pt | 1 | 0 | 0.00000 |
| HETATM | 57 | O  | 1.61151 | 2.79121 | 30.86935 | O  | 1 | 0 | 0.00000 |
| HETATM | 58 | O  | 1.61151 | 2.79121 | -1.24215 | O  | 1 | 0 | 0.00000 |

UNIT ENERGY kcal  
ENERGY -7502.498169  
END

XTLGRF 200  
DESCRP A0106  
REMARK Pt111\_0.33ML\_3x3x14\_30.0\_vac  
FIXATOMS 55 72  
CRYSTX 8.37364 8.37364 59.62720 90.00000 90.00000 60.00000  
FORMAT ATOM (a6,1x,i5,1x,a5,1x,a3,1x,a1,1x,a5,3f10.5,1x,a5,i3,i2,1x,f8.5)  

|        |    |    |          |          |          |    |   |   |         |
|--------|----|----|----------|----------|----------|----|---|---|---------|
| HETATM | 1  | Pt | -0.00924 | -0.01601 | -0.09408 | Pt | 1 | 0 | 0.00000 |
| HETATM | 2  | Pt | 0.01848  | 2.79121  | -0.09408 | Pt | 1 | 0 | 0.00000 |
| HETATM | 3  | Pt | -0.00924 | 5.59843  | -0.09408 | Pt | 1 | 0 | 0.00000 |
| HETATM | 4  | Pt | 2.40802  | 1.41161  | -0.09408 | Pt | 1 | 0 | 0.00000 |
| HETATM | 5  | Pt | 2.40802  | 4.17081  | -0.09408 | Pt | 1 | 0 | 0.00000 |
| HETATM | 6  | Pt | 2.43574  | 6.97803  | -0.09408 | Pt | 1 | 0 | 0.00000 |
| HETATM | 7  | Pt | 4.85300  | 2.79121  | -0.09408 | Pt | 1 | 0 | 0.00000 |
| HETATM | 8  | Pt | 4.82528  | 5.59843  | -0.09408 | Pt | 1 | 0 | 0.00000 |
| HETATM | 9  | Pt | 4.82528  | 8.35763  | -0.09408 | Pt | 1 | 0 | 0.00000 |
| HETATM | 10 | Pt | 0.81068  | 1.40414  | 2.26861  | Pt | 1 | 0 | 0.00000 |
| HETATM | 11 | Pt | 0.81068  | 4.17828  | 2.26861  | Pt | 1 | 0 | 0.00000 |
| HETATM | 12 | Pt | 0.79590  | 6.97803  | 2.26861  | Pt | 1 | 0 | 0.00000 |
| HETATM | 13 | Pt | 3.21316  | 2.79121  | 2.26861  | Pt | 1 | 0 | 0.00000 |
| HETATM | 14 | Pt | 3.22794  | 5.59096  | 2.26861  | Pt | 1 | 0 | 0.00000 |
| HETATM | 15 | Pt | 3.22794  | 8.36510  | 2.26861  | Pt | 1 | 0 | 0.00000 |
| HETATM | 16 | Pt | 5.64520  | 4.17828  | 2.26861  | Pt | 1 | 0 | 0.00000 |

|        |    |    |          |          |          |    |   |   |         |
|--------|----|----|----------|----------|----------|----|---|---|---------|
| HETATM | 17 | Pt | 5.63042  | 6.97803  | 2.26861  | Pt | 1 | 0 | 0.00000 |
| HETATM | 18 | Pt | 5.64520  | 9.77778  | 2.26861  | Pt | 1 | 0 | 0.00000 |
| HETATM | 19 | Pt | 1.61151  | 2.79121  | 4.55324  | Pt | 1 | 0 | 0.00000 |
| HETATM | 20 | Pt | 1.61151  | 5.58242  | 4.54701  | Pt | 1 | 0 | 0.00000 |
| HETATM | 21 | Pt | 1.61151  | 8.37364  | 4.54701  | Pt | 1 | 0 | 0.00000 |
| HETATM | 22 | Pt | 4.02877  | 4.18682  | 4.54701  | Pt | 1 | 0 | 0.00000 |
| HETATM | 23 | Pt | 4.02877  | 6.97803  | 4.55324  | Pt | 1 | 0 | 0.00000 |
| HETATM | 24 | Pt | 4.02877  | 9.76924  | 4.54701  | Pt | 1 | 0 | 0.00000 |
| HETATM | 25 | Pt | 6.44603  | 5.58242  | 4.54701  | Pt | 1 | 0 | 0.00000 |
| HETATM | 26 | Pt | 6.44603  | 8.37364  | 4.54701  | Pt | 1 | 0 | 0.00000 |
| HETATM | 27 | Pt | 6.44603  | 11.16485 | 4.55324  | Pt | 1 | 0 | 0.00000 |
| HETATM | 28 | Pt | 0.00030  | 0.00052  | 6.83003  | Pt | 1 | 0 | 0.00000 |
| HETATM | 29 | Pt | -0.00061 | 2.79121  | 6.83003  | Pt | 1 | 0 | 0.00000 |
| HETATM | 30 | Pt | 0.00030  | 5.58190  | 6.83003  | Pt | 1 | 0 | 0.00000 |
| HETATM | 31 | Pt | 2.41756  | 1.39508  | 6.83003  | Pt | 1 | 0 | 0.00000 |
| HETATM | 32 | Pt | 2.41756  | 4.18734  | 6.83003  | Pt | 1 | 0 | 0.00000 |
| HETATM | 33 | Pt | 2.41666  | 6.97803  | 6.83003  | Pt | 1 | 0 | 0.00000 |
| HETATM | 34 | Pt | 4.83392  | 2.79121  | 6.83003  | Pt | 1 | 0 | 0.00000 |
| HETATM | 35 | Pt | 4.83482  | 5.58190  | 6.83003  | Pt | 1 | 0 | 0.00000 |
| HETATM | 36 | Pt | 4.83482  | 8.37416  | 6.83003  | Pt | 1 | 0 | 0.00000 |
| HETATM | 37 | Pt | 0.80578  | 1.39565  | 9.11104  | Pt | 1 | 0 | 0.00000 |
| HETATM | 38 | Pt | 0.80578  | 4.18678  | 9.11104  | Pt | 1 | 0 | 0.00000 |
| HETATM | 39 | Pt | 0.80570  | 6.97803  | 9.11104  | Pt | 1 | 0 | 0.00000 |
| HETATM | 40 | Pt | 3.22297  | 2.79121  | 9.11104  | Pt | 1 | 0 | 0.00000 |
| HETATM | 41 | Pt | 3.22304  | 5.58247  | 9.11104  | Pt | 1 | 0 | 0.00000 |
| HETATM | 42 | Pt | 3.22304  | 8.37360  | 9.11104  | Pt | 1 | 0 | 0.00000 |
| HETATM | 43 | Pt | 5.64030  | 4.18678  | 9.11104  | Pt | 1 | 0 | 0.00000 |
| HETATM | 44 | Pt | 5.64023  | 6.97803  | 9.11104  | Pt | 1 | 0 | 0.00000 |
| HETATM | 45 | Pt | 5.64030  | 9.76929  | 9.11104  | Pt | 1 | 0 | 0.00000 |
| HETATM | 46 | Pt | 1.61151  | 2.79121  | 11.39217 | Pt | 1 | 0 | 0.00000 |
| HETATM | 47 | Pt | 1.61151  | 5.58242  | 11.39215 | Pt | 1 | 0 | 0.00000 |
| HETATM | 48 | Pt | 1.61151  | 8.37364  | 11.39216 | Pt | 1 | 0 | 0.00000 |
| HETATM | 49 | Pt | 4.02877  | 4.18682  | 11.39215 | Pt | 1 | 0 | 0.00000 |
| HETATM | 50 | Pt | 4.02877  | 6.97803  | 11.39217 | Pt | 1 | 0 | 0.00000 |
| HETATM | 51 | Pt | 4.02877  | 9.76924  | 11.39215 | Pt | 1 | 0 | 0.00000 |
| HETATM | 52 | Pt | 6.44603  | 5.58242  | 11.39215 | Pt | 1 | 0 | 0.00000 |
| HETATM | 53 | Pt | 6.44603  | 8.37364  | 11.39215 | Pt | 1 | 0 | 0.00000 |
| HETATM | 54 | Pt | 6.44603  | 11.16485 | 11.39217 | Pt | 1 | 0 | 0.00000 |
| HETATM | 55 | Pt | 0.00000  | 0.00000  | 13.67409 | Pt | 1 | 0 | 0.00000 |
| HETATM | 56 | Pt | 0.00000  | 2.79121  | 13.67409 | Pt | 1 | 0 | 0.00000 |
| HETATM | 57 | Pt | 0.00000  | 5.58242  | 13.67409 | Pt | 1 | 0 | 0.00000 |
| HETATM | 58 | Pt | 2.41726  | 1.39561  | 13.67409 | Pt | 1 | 0 | 0.00000 |
| HETATM | 59 | Pt | 2.41726  | 4.18682  | 13.67409 | Pt | 1 | 0 | 0.00000 |
| HETATM | 60 | Pt | 2.41726  | 6.97803  | 13.67409 | Pt | 1 | 0 | 0.00000 |
| HETATM | 61 | Pt | 4.83452  | 2.79121  | 13.67409 | Pt | 1 | 0 | 0.00000 |
| HETATM | 62 | Pt | 4.83452  | 5.58242  | 13.67409 | Pt | 1 | 0 | 0.00000 |
| HETATM | 63 | Pt | 4.83452  | 8.37364  | 13.67409 | Pt | 1 | 0 | 0.00000 |
| HETATM | 64 | Pt | 0.80575  | 1.39561  | 15.95311 | Pt | 1 | 0 | 0.00000 |
| HETATM | 65 | Pt | 0.80575  | 4.18682  | 15.95311 | Pt | 1 | 0 | 0.00000 |
| HETATM | 66 | Pt | 0.80575  | 6.97803  | 15.95311 | Pt | 1 | 0 | 0.00000 |
| HETATM | 67 | Pt | 3.22301  | 2.79121  | 15.95311 | Pt | 1 | 0 | 0.00000 |
| HETATM | 68 | Pt | 3.22301  | 5.58242  | 15.95311 | Pt | 1 | 0 | 0.00000 |
| HETATM | 69 | Pt | 3.22301  | 8.37364  | 15.95311 | Pt | 1 | 0 | 0.00000 |
| HETATM | 70 | Pt | 5.64027  | 4.18682  | 15.95311 | Pt | 1 | 0 | 0.00000 |
| HETATM | 71 | Pt | 5.64027  | 6.97803  | 15.95311 | Pt | 1 | 0 | 0.00000 |
| HETATM | 72 | Pt | 5.64027  | 9.76924  | 15.95311 | Pt | 1 | 0 | 0.00000 |
| HETATM | 73 | Pt | 1.61150  | 2.79121  | 18.23503 | Pt | 1 | 0 | 0.00000 |
| HETATM | 74 | Pt | 1.61150  | 5.58242  | 18.23505 | Pt | 1 | 0 | 0.00000 |
| HETATM | 75 | Pt | 1.61150  | 8.37364  | 18.23505 | Pt | 1 | 0 | 0.00000 |
| HETATM | 76 | Pt | 4.02877  | 4.18682  | 18.23505 | Pt | 1 | 0 | 0.00000 |
| HETATM | 77 | Pt | 4.02876  | 6.97803  | 18.23503 | Pt | 1 | 0 | 0.00000 |
| HETATM | 78 | Pt | 4.02877  | 9.76924  | 18.23505 | Pt | 1 | 0 | 0.00000 |
| HETATM | 79 | Pt | 6.44603  | 5.58242  | 18.23505 | Pt | 1 | 0 | 0.00000 |

|        |     |    |          |          |          |    |   |   |         |
|--------|-----|----|----------|----------|----------|----|---|---|---------|
| HETATM | 80  | Pt | 6.44603  | 8.37364  | 18.23505 | Pt | 1 | 0 | 0.00000 |
| HETATM | 81  | Pt | 6.44603  | 11.16485 | 18.23503 | Pt | 1 | 0 | 0.00000 |
| HETATM | 82  | Pt | -0.00003 | -0.00004 | 20.51616 | Pt | 1 | 0 | 0.00000 |
| HETATM | 83  | Pt | 0.00004  | 2.79121  | 20.51616 | Pt | 1 | 0 | 0.00000 |
| HETATM | 84  | Pt | -0.00003 | 5.58247  | 20.51616 | Pt | 1 | 0 | 0.00000 |
| HETATM | 85  | Pt | 2.41723  | 1.39565  | 20.51616 | Pt | 1 | 0 | 0.00000 |
| HETATM | 86  | Pt | 2.41724  | 4.18678  | 20.51616 | Pt | 1 | 0 | 0.00000 |
| HETATM | 87  | Pt | 2.41731  | 6.97803  | 20.51616 | Pt | 1 | 0 | 0.00000 |
| HETATM | 88  | Pt | 4.83457  | 2.79121  | 20.51616 | Pt | 1 | 0 | 0.00000 |
| HETATM | 89  | Pt | 4.83450  | 5.58247  | 20.51616 | Pt | 1 | 0 | 0.00000 |
| HETATM | 90  | Pt | 4.83450  | 8.37360  | 20.51616 | Pt | 1 | 0 | 0.00000 |
| HETATM | 91  | Pt | 0.80545  | 1.39508  | 22.79717 | Pt | 1 | 0 | 0.00000 |
| HETATM | 92  | Pt | 0.80545  | 4.18734  | 22.79717 | Pt | 1 | 0 | 0.00000 |
| HETATM | 93  | Pt | 0.80635  | 6.97803  | 22.79717 | Pt | 1 | 0 | 0.00000 |
| HETATM | 94  | Pt | 3.22362  | 2.79121  | 22.79717 | Pt | 1 | 0 | 0.00000 |
| HETATM | 95  | Pt | 3.22271  | 5.58190  | 22.79717 | Pt | 1 | 0 | 0.00000 |
| HETATM | 96  | Pt | 3.22271  | 8.37416  | 22.79717 | Pt | 1 | 0 | 0.00000 |
| HETATM | 97  | Pt | 5.63997  | 4.18734  | 22.79717 | Pt | 1 | 0 | 0.00000 |
| HETATM | 98  | Pt | 5.64088  | 6.97803  | 22.79717 | Pt | 1 | 0 | 0.00000 |
| HETATM | 99  | Pt | 5.63997  | 9.76872  | 22.79717 | Pt | 1 | 0 | 0.00000 |
| HETATM | 100 | Pt | 1.61151  | 2.79121  | 25.07396 | Pt | 1 | 0 | 0.00000 |
| HETATM | 101 | Pt | 1.61151  | 5.58242  | 25.08019 | Pt | 1 | 0 | 0.00000 |
| HETATM | 102 | Pt | 1.61151  | 8.37364  | 25.08019 | Pt | 1 | 0 | 0.00000 |
| HETATM | 103 | Pt | 4.02877  | 4.18682  | 25.08019 | Pt | 1 | 0 | 0.00000 |
| HETATM | 104 | Pt | 4.02877  | 6.97803  | 25.07396 | Pt | 1 | 0 | 0.00000 |
| HETATM | 105 | Pt | 4.02877  | 9.76924  | 25.08019 | Pt | 1 | 0 | 0.00000 |
| HETATM | 106 | Pt | 6.44603  | 5.58242  | 25.08019 | Pt | 1 | 0 | 0.00000 |
| HETATM | 107 | Pt | 6.44603  | 8.37364  | 25.08019 | Pt | 1 | 0 | 0.00000 |
| HETATM | 108 | Pt | 6.44603  | 11.16485 | 25.07396 | Pt | 1 | 0 | 0.00000 |
| HETATM | 109 | Pt | -0.00493 | -0.00854 | 27.35859 | Pt | 1 | 0 | 0.00000 |
| HETATM | 110 | Pt | 0.00985  | 2.79121  | 27.35859 | Pt | 1 | 0 | 0.00000 |
| HETATM | 111 | Pt | -0.00493 | 5.59096  | 27.35859 | Pt | 1 | 0 | 0.00000 |
| HETATM | 112 | Pt | 2.41233  | 1.40414  | 27.35859 | Pt | 1 | 0 | 0.00000 |
| HETATM | 113 | Pt | 2.41233  | 4.17828  | 27.35859 | Pt | 1 | 0 | 0.00000 |
| HETATM | 114 | Pt | 2.42711  | 6.97803  | 27.35859 | Pt | 1 | 0 | 0.00000 |
| HETATM | 115 | Pt | 4.84437  | 2.79121  | 27.35859 | Pt | 1 | 0 | 0.00000 |
| HETATM | 116 | Pt | 4.82959  | 5.59096  | 27.35859 | Pt | 1 | 0 | 0.00000 |
| HETATM | 117 | Pt | 4.82959  | 8.36510  | 27.35859 | Pt | 1 | 0 | 0.00000 |
| HETATM | 118 | Pt | 0.81499  | 1.41161  | 29.72128 | Pt | 1 | 0 | 0.00000 |
| HETATM | 119 | Pt | 0.81499  | 4.17081  | 29.72128 | Pt | 1 | 0 | 0.00000 |
| HETATM | 120 | Pt | 0.78727  | 6.97803  | 29.72128 | Pt | 1 | 0 | 0.00000 |
| HETATM | 121 | Pt | 3.20453  | 2.79121  | 29.72128 | Pt | 1 | 0 | 0.00000 |
| HETATM | 122 | Pt | 3.23225  | 5.59843  | 29.72128 | Pt | 1 | 0 | 0.00000 |
| HETATM | 123 | Pt | 3.23225  | 8.35763  | 29.72128 | Pt | 1 | 0 | 0.00000 |
| HETATM | 124 | Pt | 5.64951  | 4.17081  | 29.72128 | Pt | 1 | 0 | 0.00000 |
| HETATM | 125 | Pt | 5.62179  | 6.97803  | 29.72128 | Pt | 1 | 0 | 0.00000 |
| HETATM | 126 | Pt | 5.64951  | 9.78525  | 29.72128 | Pt | 1 | 0 | 0.00000 |
| HETATM | 127 | O  | 1.61151  | 2.79121  | 30.84302 | O  | 1 | 0 | 0.00000 |
| HETATM | 128 | O  | 1.61151  | 2.79121  | -1.21582 | O  | 1 | 0 | 0.00000 |
| HETATM | 129 | O  | 4.02877  | 6.97803  | 30.84302 | O  | 1 | 0 | 0.00000 |
| HETATM | 130 | O  | 6.44603  | 11.16485 | 30.84302 | O  | 1 | 0 | 0.00000 |
| HETATM | 131 | O  | 4.02877  | 6.97803  | -1.21582 | O  | 1 | 0 | 0.00000 |
| HETATM | 132 | O  | 6.44603  | 11.16485 | -1.21582 | O  | 1 | 0 | 0.00000 |

UNIT ENERGY kcal  
ENERGY -16995.842213  
END

XTLGRF 200  
DESCRP A0088  
REMARK Pt111\_0.50ML\_2x1x14\_30.0\_vac  
RUTYPE NORMAL RUN  
FIXATOMS 13 16  
CRYSTX 5.58242 2.79121 59.62720 90.00000 90.00000 60.00000

```

FORMAT ATOM (a6,1x,i5,1x,a5,1x,a3,1x,a1,1x,a5,3f10.5,1x,a5,i3,i2,1x,f8.5)
HETATM 1 Pt 0.00128 0.00000 -0.03099 Pt 1 0 0.00000
HETATM 2 Pt 2.37566 1.39561 -0.32773 Pt 1 0 0.00000
HETATM 3 Pt 0.81388 1.39561 2.23856 Pt 1 0 0.00000
HETATM 4 Pt 3.20649 2.79121 2.30691 Pt 1 0 0.00000
HETATM 5 Pt 1.59949 2.79121 4.55034 Pt 1 0 0.00000
HETATM 6 Pt 4.02719 4.18682 4.55832 Pt 1 0 0.00000
HETATM 7 Pt -0.00344 0.00000 6.83632 Pt 1 0 0.00000
HETATM 8 Pt 2.41270 1.39561 6.83179 Pt 1 0 0.00000
HETATM 9 Pt 0.80543 1.39561 9.11455 Pt 1 0 0.00000
HETATM 10 Pt 3.22206 2.79121 9.11335 Pt 1 0 0.00000
HETATM 11 Pt 1.61236 2.79121 11.39418 Pt 1 0 0.00000
HETATM 12 Pt 4.02944 4.18682 11.39378 Pt 1 0 0.00000
HETATM 13 Pt 0.00000 0.00000 13.67409 Pt 1 0 0.00000
HETATM 14 Pt 2.41726 1.39561 13.67409 Pt 1 0 0.00000
HETATM 15 Pt 0.80575 1.39561 15.95311 Pt 1 0 0.00000
HETATM 16 Pt 3.22301 2.79121 15.95311 Pt 1 0 0.00000
HETATM 17 Pt 1.61065 2.79121 18.23302 Pt 1 0 0.00000
HETATM 18 Pt 4.02809 4.18682 18.23342 Pt 1 0 0.00000
HETATM 19 Pt 0.00095 0.00000 20.51385 Pt 1 0 0.00000
HETATM 20 Pt 2.41758 1.39561 20.51265 Pt 1 0 0.00000
HETATM 21 Pt 0.81031 1.39561 22.79541 Pt 1 0 0.00000
HETATM 22 Pt 3.22645 2.79121 22.79088 Pt 1 0 0.00000
HETATM 23 Pt 1.62352 2.79121 25.07686 Pt 1 0 0.00000
HETATM 24 Pt 4.03034 4.18682 25.06888 Pt 1 0 0.00000
HETATM 25 Pt 0.01652 0.00000 27.32029 Pt 1 0 0.00000
HETATM 26 Pt 2.40913 1.39561 27.38864 Pt 1 0 0.00000
HETATM 27 Pt 0.84735 1.39561 29.95493 Pt 1 0 0.00000
HETATM 28 Pt 3.22173 2.79121 29.65819 Pt 1 0 0.00000
HETATM 29 O 1.82724 2.79121 30.96101 O 1 0 0.00000
HETATM 30 O 1.39577 2.79121 -1.33381 O 1 0 0.00000
UNIT ENERGY kcal
ENERGY -3825.367178
END

```

```

XTLGRF 200
DESCRP A0099
REMARK Pt111_0.75ML_4x1x12_30.0_vac
RUTYPE NORMAL RUN
FIXATOMS 21 28
CRYSTX 11.16485 2.79121 55.06917 90.00000 90.00000 60.00000
FORMAT ATOM (a6,1x,i5,1x,a5,1x,a3,1x,a1,1x,a5,3f10.5,1x,a5,i3,i2,1x,f8.5)
HETATM 1 Pt 0.00153 0.00002 0.04219 Pt 1 0 0.00000
HETATM 2 Pt 2.42809 1.39560 -0.03397 Pt 1 0 0.00000
HETATM 3 Pt 4.84425 2.79122 -0.00365 Pt 1 0 0.00000
HETATM 4 Pt 7.24087 4.18688 -0.00726 Pt 1 0 0.00000
HETATM 5 Pt 0.81426 1.39557 2.29064 Pt 1 0 0.00000
HETATM 6 Pt 3.22195 2.79116 2.26491 Pt 1 0 0.00000
HETATM 7 Pt 5.63941 4.18677 2.27973 Pt 1 0 0.00000
HETATM 8 Pt 8.05416 5.58239 2.28420 Pt 1 0 0.00000
HETATM 9 Pt 1.61389 2.79112 4.56164 Pt 1 0 0.00000
HETATM 10 Pt 4.02675 4.18672 4.55194 Pt 1 0 0.00000
HETATM 11 Pt 6.44508 5.58234 4.55987 Pt 1 0 0.00000
HETATM 12 Pt 8.86365 6.97795 4.56140 Pt 1 0 0.00000
HETATM 13 Pt 0.00019 -0.00010 6.83913 Pt 1 0 0.00000
HETATM 14 Pt 2.41774 1.39550 6.83774 Pt 1 0 0.00000
HETATM 15 Pt 4.83324 2.79110 6.83460 Pt 1 0 0.00000
HETATM 16 Pt 7.25141 4.18672 6.83869 Pt 1 0 0.00000
HETATM 17 Pt 0.80614 1.39554 9.11687 Pt 1 0 0.00000
HETATM 18 Pt 3.22318 2.79115 9.11595 Pt 1 0 0.00000
HETATM 19 Pt 5.63969 4.18675 9.11540 Pt 1 0 0.00000
HETATM 20 Pt 8.05754 5.58237 9.11715 Pt 1 0 0.00000
HETATM 21 Pt 1.61151 2.79121 11.39508 Pt 1 0 0.00000

```

|        |    |    |          |          |          |    |   |   |         |
|--------|----|----|----------|----------|----------|----|---|---|---------|
| HETATM | 22 | Pt | 4.02877  | 4.18682  | 11.39508 | Pt | 1 | 0 | 0.00000 |
| HETATM | 23 | Pt | 6.44603  | 5.58242  | 11.39508 | Pt | 1 | 0 | 0.00000 |
| HETATM | 24 | Pt | 8.86329  | 6.97803  | 11.39508 | Pt | 1 | 0 | 0.00000 |
| HETATM | 25 | Pt | 0.00000  | 0.00000  | 13.67409 | Pt | 1 | 0 | 0.00000 |
| HETATM | 26 | Pt | 2.41726  | 1.39561  | 13.67409 | Pt | 1 | 0 | 0.00000 |
| HETATM | 27 | Pt | 4.83452  | 2.79121  | 13.67409 | Pt | 1 | 0 | 0.00000 |
| HETATM | 28 | Pt | 7.25178  | 4.18682  | 13.67409 | Pt | 1 | 0 | 0.00000 |
| HETATM | 29 | Pt | 0.80664  | 1.39561  | 15.95387 | Pt | 1 | 0 | 0.00000 |
| HETATM | 30 | Pt | 3.22340  | 2.79121  | 15.95164 | Pt | 1 | 0 | 0.00000 |
| HETATM | 31 | Pt | 5.64158  | 4.18682  | 15.95262 | Pt | 1 | 0 | 0.00000 |
| HETATM | 32 | Pt | 8.05906  | 5.58242  | 15.95415 | Pt | 1 | 0 | 0.00000 |
| HETATM | 33 | Pt | 1.61265  | 2.79121  | 18.23303 | Pt | 1 | 0 | 0.00000 |
| HETATM | 34 | Pt | 4.02879  | 4.18682  | 18.22814 | Pt | 1 | 0 | 0.00000 |
| HETATM | 35 | Pt | 6.44810  | 5.58242  | 18.23206 | Pt | 1 | 0 | 0.00000 |
| HETATM | 36 | Pt | 8.86547  | 6.97803  | 18.23483 | Pt | 1 | 0 | 0.00000 |
| HETATM | 37 | Pt | 0.00262  | -0.00000 | 20.51596 | Pt | 1 | 0 | 0.00000 |
| HETATM | 38 | Pt | 2.41759  | 1.39560  | 20.51226 | Pt | 1 | 0 | 0.00000 |
| HETATM | 39 | Pt | 4.83302  | 2.79121  | 20.50291 | Pt | 1 | 0 | 0.00000 |
| HETATM | 40 | Pt | 7.25477  | 4.18682  | 20.51321 | Pt | 1 | 0 | 0.00000 |
| HETATM | 41 | Pt | 0.80719  | 1.39560  | 22.79908 | Pt | 1 | 0 | 0.00000 |
| HETATM | 42 | Pt | 3.22295  | 2.79121  | 22.78989 | Pt | 1 | 0 | 0.00000 |
| HETATM | 43 | Pt | 5.63438  | 4.18682  | 22.77384 | Pt | 1 | 0 | 0.00000 |
| HETATM | 44 | Pt | 8.06519  | 5.58242  | 22.79774 | Pt | 1 | 0 | 0.00000 |
| HETATM | 45 | Pt | 1.61940  | 2.79121  | 25.07494 | Pt | 1 | 0 | 0.00000 |
| HETATM | 46 | Pt | 4.01540  | 4.18681  | 25.07581 | Pt | 1 | 0 | 0.00000 |
| HETATM | 47 | Pt | 6.44178  | 5.58242  | 25.02761 | Pt | 1 | 0 | 0.00000 |
| HETATM | 48 | Pt | 8.87365  | 6.97803  | 25.10441 | Pt | 1 | 0 | 0.00000 |
| HETATM | 49 | Pt | 0.28726  | -0.00000 | 27.65559 | Pt | 1 | 0 | 0.00000 |
| HETATM | 50 | Pt | 4.73811  | 2.79121  | 27.44732 | Pt | 1 | 0 | 0.00000 |
| HETATM | 51 | Pt | 7.39627  | 4.18682  | 27.48425 | Pt | 1 | 0 | 0.00000 |
| HETATM | 52 | Pt | 2.60947  | 1.39560  | 29.22827 | Pt | 1 | 0 | 0.00000 |
| HETATM | 53 | O  | 8.16330  | 5.58242  | 28.62788 | O  | 1 | 0 | 0.00000 |
| HETATM | 54 | O  | 1.19711  | 2.79121  | 29.51459 | O  | 1 | 0 | 0.00000 |
| HETATM | 55 | O  | 4.05975  | 2.79121  | 29.35253 | O  | 1 | 0 | 0.00000 |
| HETATM | 56 | Pt | 3.51515  | 2.79117  | -2.58653 | Pt | 1 | 0 | 0.00000 |
| HETATM | 57 | Pt | 7.96521  | 5.58268  | -2.37862 | Pt | 1 | 0 | 0.00000 |
| HETATM | 58 | Pt | 10.62354 | 6.97768  | -2.41505 | Pt | 1 | 0 | 0.00000 |
| HETATM | 59 | Pt | 5.83624  | 4.18703  | -4.16124 | Pt | 1 | 0 | 0.00000 |
| HETATM | 60 | O  | 1.72177  | -0.00007 | -3.55851 | O  | 1 | 0 | 0.00000 |
| HETATM | 61 | O  | 4.42386  | 2.79134  | -4.44619 | O  | 1 | 0 | 0.00000 |
| HETATM | 62 | O  | 7.28667  | 5.58268  | -4.28383 | O  | 1 | 0 | 0.00000 |

UNIT ENERGY kcal  
ENERGY -7788.991477  
END

XTLGRF 200  
DESCRP A0066  
REMARK Pt111\_1.00ML\_4x1x12\_30.0\_vac  
FIXATOMS 21 28  
CRYSTX 11.16482 2.79121 55.06910 90.00000 90.00000 60.00000  
FORMAT ATOM (a6,1x,i5,1x,a5,1x,a3,1x,a1,1x,a5,3f10.5,1x,a5,i3,i2,1x,f8.5)  

|        |    |    |          |          |          |    |   |   |         |
|--------|----|----|----------|----------|----------|----|---|---|---------|
| HETATM | 1  | Pt | -0.08044 | -0.00000 | -0.00987 | Pt | 1 | 0 | 0.00000 |
| HETATM | 2  | Pt | 2.33516  | 1.39560  | -0.30543 | Pt | 1 | 0 | 0.00000 |
| HETATM | 3  | Pt | 4.91013  | 2.79121  | 0.03774  | Pt | 1 | 0 | 0.00000 |
| HETATM | 4  | Pt | 7.24527  | 4.18681  | -0.05108 | Pt | 1 | 0 | 0.00000 |
| HETATM | 5  | Pt | 0.77422  | 1.39560  | 2.26346  | Pt | 1 | 0 | 0.00000 |
| HETATM | 6  | Pt | 3.19698  | 2.79120  | 2.24166  | Pt | 1 | 0 | 0.00000 |
| HETATM | 7  | Pt | 5.63357  | 4.18681  | 2.31257  | Pt | 1 | 0 | 0.00000 |
| HETATM | 8  | Pt | 8.02600  | 5.58241  | 2.26751  | Pt | 1 | 0 | 0.00000 |
| HETATM | 9  | Pt | 1.59119  | 2.79121  | 4.54167  | Pt | 1 | 0 | 0.00000 |
| HETATM | 10 | Pt | 4.00394  | 4.18681  | 4.54621  | Pt | 1 | 0 | 0.00000 |
| HETATM | 11 | Pt | 6.43101  | 5.58241  | 4.57277  | Pt | 1 | 0 | 0.00000 |
| HETATM | 12 | Pt | 8.84289  | 6.97801  | 4.54905  | Pt | 1 | 0 | 0.00000 |



|        |    |    |          |          |          |    |   |   |         |
|--------|----|----|----------|----------|----------|----|---|---|---------|
| HETATM | 13 | Pt | -0.01385 | -0.00000 | 6.82970  | Pt | 1 | 0 | 0.00000 |
| HETATM | 14 | Pt | 2.40117  | 1.39560  | 6.82804  | Pt | 1 | 0 | 0.00000 |
| HETATM | 15 | Pt | 4.81783  | 2.79120  | 6.83332  | Pt | 1 | 0 | 0.00000 |
| HETATM | 16 | Pt | 7.24016  | 4.18680  | 6.84174  | Pt | 1 | 0 | 0.00000 |
| HETATM | 17 | Pt | 0.79819  | 1.39560  | 9.11222  | Pt | 1 | 0 | 0.00000 |
| HETATM | 18 | Pt | 3.21424  | 2.79120  | 9.11244  | Pt | 1 | 0 | 0.00000 |
| HETATM | 19 | Pt | 5.63198  | 4.18681  | 9.11496  | Pt | 1 | 0 | 0.00000 |
| HETATM | 20 | Pt | 8.05128  | 5.58241  | 9.11677  | Pt | 1 | 0 | 0.00000 |
| HETATM | 21 | Pt | 1.61150  | 2.79121  | 11.39505 | Pt | 1 | 0 | 0.00000 |
| HETATM | 22 | Pt | 4.02876  | 4.18681  | 11.39505 | Pt | 1 | 0 | 0.00000 |
| HETATM | 23 | Pt | 6.44601  | 5.58241  | 11.39505 | Pt | 1 | 0 | 0.00000 |
| HETATM | 24 | Pt | 8.86327  | 6.97801  | 11.39505 | Pt | 1 | 0 | 0.00000 |
| HETATM | 25 | Pt | 0.00000  | 0.00000  | 13.67406 | Pt | 1 | 0 | 0.00000 |
| HETATM | 26 | Pt | 2.41725  | 1.39560  | 13.67406 | Pt | 1 | 0 | 0.00000 |
| HETATM | 27 | Pt | 4.83451  | 2.79121  | 13.67406 | Pt | 1 | 0 | 0.00000 |
| HETATM | 28 | Pt | 7.25176  | 4.18681  | 13.67406 | Pt | 1 | 0 | 0.00000 |
| HETATM | 29 | Pt | 0.80692  | 1.39560  | 15.95582 | Pt | 1 | 0 | 0.00000 |
| HETATM | 30 | Pt | 3.22383  | 2.79120  | 15.95308 | Pt | 1 | 0 | 0.00000 |
| HETATM | 31 | Pt | 5.64275  | 4.18681  | 15.95419 | Pt | 1 | 0 | 0.00000 |
| HETATM | 32 | Pt | 8.06109  | 5.58241  | 15.95814 | Pt | 1 | 0 | 0.00000 |
| HETATM | 33 | Pt | 1.61204  | 2.79121  | 18.23578 | Pt | 1 | 0 | 0.00000 |
| HETATM | 34 | Pt | 4.03057  | 4.18681  | 18.23012 | Pt | 1 | 0 | 0.00000 |
| HETATM | 35 | Pt | 6.45297  | 5.58241  | 18.23475 | Pt | 1 | 0 | 0.00000 |
| HETATM | 36 | Pt | 8.86970  | 6.97802  | 18.24537 | Pt | 1 | 0 | 0.00000 |
| HETATM | 37 | Pt | 0.00482  | 0.00000  | 20.53816 | Pt | 1 | 0 | 0.00000 |
| HETATM | 38 | Pt | 2.41323  | 1.39561  | 20.50937 | Pt | 1 | 0 | 0.00000 |
| HETATM | 39 | Pt | 4.84651  | 2.79121  | 20.50063 | Pt | 1 | 0 | 0.00000 |
| HETATM | 40 | Pt | 7.26046  | 4.18681  | 20.52231 | Pt | 1 | 0 | 0.00000 |
| HETATM | 41 | Pt | 0.78827  | 1.39561  | 22.84087 | Pt | 1 | 0 | 0.00000 |
| HETATM | 42 | Pt | 3.26032  | 2.79121  | 22.74414 | Pt | 1 | 0 | 0.00000 |
| HETATM | 43 | Pt | 5.64907  | 4.18681  | 22.79623 | Pt | 1 | 0 | 0.00000 |
| HETATM | 44 | Pt | 8.04675  | 5.58242  | 22.81742 | Pt | 1 | 0 | 0.00000 |
| HETATM | 45 | Pt | 1.71112  | 2.79122  | 25.08693 | Pt | 1 | 0 | 0.00000 |
| HETATM | 46 | Pt | 4.03544  | 4.18682  | 25.09108 | Pt | 1 | 0 | 0.00000 |
| HETATM | 47 | Pt | 6.38478  | 5.58242  | 25.10351 | Pt | 1 | 0 | 0.00000 |
| HETATM | 48 | Pt | 8.75629  | 6.97802  | 25.14942 | Pt | 1 | 0 | 0.00000 |
| HETATM | 49 | Pt | 0.20724  | 0.00001  | 28.13340 | Pt | 1 | 0 | 0.00000 |
| HETATM | 50 | Pt | 4.50493  | 2.79124  | 27.57221 | Pt | 1 | 0 | 0.00000 |
| HETATM | 51 | Pt | 7.27319  | 4.18680  | 27.66068 | Pt | 1 | 0 | 0.00000 |
| HETATM | 52 | Pt | 2.55728  | 1.39564  | 29.65935 | Pt | 1 | 0 | 0.00000 |
| HETATM | 53 | O  | 7.90547  | 5.58242  | 28.88142 | O  | 1 | 0 | 0.00000 |
| HETATM | 54 | O  | 1.16743  | 2.79124  | 30.02334 | O  | 1 | 0 | 0.00000 |
| HETATM | 55 | O  | 3.99818  | 2.79124  | 29.59397 | O  | 1 | 0 | 0.00000 |
| HETATM | 56 | O  | 0.86714  | 2.79124  | 26.56959 | O  | 1 | 0 | 0.00000 |
| HETATM | 57 | Pt | 1.77879  | 2.79120  | -2.99853 | Pt |   |   |         |
