# Supplementary material for: Development of a ReaxFF potential for Pt–O systems describing the energetics and dynamics of Pt-oxide formation
Source: Royal Society of Chemistry journal article supplement (doi:10.1039/c4cp03111c), 2014-01-01
Supplement: c4cp03111c1.zip [file c4cp03111c1.zip]

```

XTLGRF 200
DESCRP IS
REMARK Pt111_0.25ML_8x8x7_30.0_vac fcc-displacement
FIXATOMS      1      128
CRYSTX      22.32968      22.32968      43.67409      90.00000      90.00000      60.00000
FORMAT ATOM      (a6,lx,i5,lx,a5,lx,a3,lx,a1,lx,a5,3f10.5,lx,a5,i3,i2,lx,f8.5)
HETATM      1 Pt      2.01698      17.64996      14.96615      Pt      0 0      0.00000
HETATM      2 Pt      2.01698      23.23238      14.96615      Pt      0 0      0.00000
HETATM      3 Pt      2.01698      6.48512      14.96615      Pt      0 0      0.00000
HETATM      4 Pt      2.01698      12.06754      14.96615      Pt      0 0      0.00000
HETATM      5 Pt      6.85150      20.44117      14.96615      Pt      0 0      0.00000
HETATM      6 Pt      6.85150      26.02359      14.96615      Pt      0 0      0.00000
HETATM      7 Pt      6.85150      9.27633      14.96615      Pt      0 0      0.00000
HETATM      8 Pt      6.85150      14.85875      14.96615      Pt      0 0      0.00000
HETATM      9 Pt      11.68602      23.23238      14.96615      Pt      0 0      0.00000
HETATM     10 Pt      11.68602      28.81480      14.96615      Pt      0 0      0.00000
HETATM     11 Pt      11.68602      12.06754      14.96615      Pt      0 0      0.00000
HETATM     12 Pt      11.68602      17.64996      14.96615      Pt      0 0      0.00000
HETATM     13 Pt      16.52053      26.02359      14.96615      Pt      0 0      0.00000
HETATM     14 Pt      16.52053      31.60601      14.96615      Pt      0 0      0.00000
HETATM     15 Pt      16.52053      14.85875      14.96615      Pt      0 0      0.00000
HETATM     16 Pt      16.52053      20.44117      14.96615      Pt      0 0      0.00000
HETATM     17 Pt      2.01698      20.44117      14.96615      Pt      0 0      0.00000
HETATM     18 Pt      2.01698      3.69391      14.96615      Pt      0 0      0.00000
HETATM     19 Pt      2.01698      9.27633      14.96615      Pt      0 0      0.00000
HETATM     20 Pt      2.01698      14.85875      14.96615      Pt      0 0      0.00000
HETATM     21 Pt      6.85150      23.23238      14.96615      Pt      0 0      0.00000
HETATM     22 Pt      6.85150      6.48512      14.96615      Pt      0 0      0.00000
HETATM     23 Pt      6.85150      12.06754      14.96615      Pt      0 0      0.00000
HETATM     24 Pt      6.85150      17.64996      14.96615      Pt      0 0      0.00000
HETATM     25 Pt      11.68602      26.02359      14.96615      Pt      0 0      0.00000
HETATM     26 Pt      11.68602      9.27633      14.96615      Pt      0 0      0.00000
HETATM     27 Pt      11.68602      14.85875      14.96615      Pt      0 0      0.00000
HETATM     28 Pt      11.68602      20.44117      14.96615      Pt      0 0      0.00000
HETATM     29 Pt      16.52053      28.81480      14.96615      Pt      0 0      0.00000
HETATM     30 Pt      16.52053      12.06754      14.96615      Pt      0 0      0.00000
HETATM     31 Pt      16.52053      17.64996      14.96615      Pt      0 0      0.00000
HETATM     32 Pt      16.52053      23.23238      14.96615      Pt      0 0      0.00000
HETATM     33 Pt      4.43424      19.04557      14.96615      Pt      0 0      0.00000
HETATM     34 Pt      4.43424      24.62799      14.96615      Pt      0 0      0.00000
HETATM     35 Pt      4.43424      7.88073      14.96615      Pt      0 0      0.00000
HETATM     36 Pt      4.43424      13.46315      14.96615      Pt      0 0      0.00000
HETATM     37 Pt      9.26876      21.83678      14.96615      Pt      0 0      0.00000
HETATM     38 Pt      9.26876      27.41920      14.96615      Pt      0 0      0.00000
HETATM     39 Pt      9.26876      10.67194      14.96615      Pt      0 0      0.00000
HETATM     40 Pt      9.26876      16.25436      14.96615      Pt      0 0      0.00000
HETATM     41 Pt      14.10328      24.62799      14.96615      Pt      0 0      0.00000
HETATM     42 Pt      14.10328      30.21041      14.96615      Pt      0 0      0.00000
HETATM     43 Pt      14.10328      13.46315      14.96615      Pt      0 0      0.00000
HETATM     44 Pt      14.10328      19.04557      14.96615      Pt      0 0      0.00000
HETATM     45 Pt      18.93779      27.41920      14.96615      Pt      0 0      0.00000
HETATM     46 Pt      18.93779      33.00162      14.96615      Pt      0 0      0.00000
HETATM     47 Pt      18.93779      16.25436      14.96615      Pt      0 0      0.00000
HETATM     48 Pt      18.93779      21.83678      14.96615      Pt      0 0      0.00000
HETATM     49 Pt      4.43424      21.83678      14.96615      Pt      0 0      0.00000
HETATM     50 Pt      4.43424      5.08952      14.96615      Pt      0 0      0.00000
HETATM     51 Pt      4.43424      10.67194      14.96615      Pt      0 0      0.00000
HETATM     52 Pt      4.43424      16.25436      14.96615      Pt      0 0      0.00000
HETATM     53 Pt      9.26876      24.62799      14.96615      Pt      0 0      0.00000
HETATM     54 Pt      9.26876      7.88073      14.96615      Pt      0 0      0.00000
HETATM     55 Pt      9.26876      13.46315      14.96615      Pt      0 0      0.00000
HETATM     56 Pt      9.26876      19.04557      14.96615      Pt      0 0      0.00000
HETATM     57 Pt      14.10328      27.41920      14.96615      Pt      0 0      0.00000

```

|        |     |    |          |          |          |    |   |   |         |
|--------|-----|----|----------|----------|----------|----|---|---|---------|
| HETATM | 58  | Pt | 14.10328 | 10.67194 | 14.96615 | Pt | 0 | 0 | 0.00000 |
| HETATM | 59  | Pt | 14.10328 | 16.25436 | 14.96615 | Pt | 0 | 0 | 0.00000 |
| HETATM | 60  | Pt | 14.10328 | 21.83678 | 14.96615 | Pt | 0 | 0 | 0.00000 |
| HETATM | 61  | Pt | 18.93779 | 30.21041 | 14.96615 | Pt | 0 | 0 | 0.00000 |
| HETATM | 62  | Pt | 18.93779 | 13.46315 | 14.96615 | Pt | 0 | 0 | 0.00000 |
| HETATM | 63  | Pt | 18.93779 | 19.04557 | 14.96615 | Pt | 0 | 0 | 0.00000 |
| HETATM | 64  | Pt | 18.93779 | 24.62799 | 14.96615 | Pt | 0 | 0 | 0.00000 |
| HETATM | 65  | Pt | 2.82273  | 19.04557 | 17.24517 | Pt | 0 | 0 | 0.00000 |
| HETATM | 66  | Pt | 2.82273  | 2.29831  | 17.24517 | Pt | 0 | 0 | 0.00000 |
| HETATM | 67  | Pt | 2.82273  | 7.88073  | 17.24517 | Pt | 0 | 0 | 0.00000 |
| HETATM | 68  | Pt | 2.82273  | 13.46315 | 17.24517 | Pt | 0 | 0 | 0.00000 |
| HETATM | 69  | Pt | 7.65725  | 21.83678 | 17.24517 | Pt | 0 | 0 | 0.00000 |
| HETATM | 70  | Pt | 7.65725  | 5.08952  | 17.24517 | Pt | 0 | 0 | 0.00000 |
| HETATM | 71  | Pt | 7.65725  | 10.67194 | 17.24517 | Pt | 0 | 0 | 0.00000 |
| HETATM | 72  | Pt | 7.65725  | 16.25436 | 17.24517 | Pt | 0 | 0 | 0.00000 |
| HETATM | 73  | Pt | 12.49177 | 24.62799 | 17.24517 | Pt | 0 | 0 | 0.00000 |
| HETATM | 74  | Pt | 12.49177 | 7.88073  | 17.24517 | Pt | 0 | 0 | 0.00000 |
| HETATM | 75  | Pt | 12.49177 | 13.46315 | 17.24517 | Pt | 0 | 0 | 0.00000 |
| HETATM | 76  | Pt | 12.49177 | 19.04557 | 17.24517 | Pt | 0 | 0 | 0.00000 |
| HETATM | 77  | Pt | 17.32628 | 27.41920 | 17.24517 | Pt | 0 | 0 | 0.00000 |
| HETATM | 78  | Pt | 17.32628 | 10.67194 | 17.24517 | Pt | 0 | 0 | 0.00000 |
| HETATM | 79  | Pt | 17.32628 | 16.25436 | 17.24517 | Pt | 0 | 0 | 0.00000 |
| HETATM | 80  | Pt | 17.32628 | 21.83678 | 17.24517 | Pt | 0 | 0 | 0.00000 |
| HETATM | 81  | Pt | 2.82273  | 21.83678 | 17.24517 | Pt | 0 | 0 | 0.00000 |
| HETATM | 82  | Pt | 2.82273  | 5.08952  | 17.24517 | Pt | 0 | 0 | 0.00000 |
| HETATM | 83  | Pt | 2.82273  | 10.67194 | 17.24517 | Pt | 0 | 0 | 0.00000 |
| HETATM | 84  | Pt | 2.82273  | 16.25436 | 17.24517 | Pt | 0 | 0 | 0.00000 |
| HETATM | 85  | Pt | 7.65725  | 24.62799 | 17.24517 | Pt | 0 | 0 | 0.00000 |
| HETATM | 86  | Pt | 7.65725  | 7.88073  | 17.24517 | Pt | 0 | 0 | 0.00000 |
| HETATM | 87  | Pt | 7.65725  | 13.46315 | 17.24517 | Pt | 0 | 0 | 0.00000 |
| HETATM | 88  | Pt | 7.65725  | 19.04557 | 17.24517 | Pt | 0 | 0 | 0.00000 |
| HETATM | 89  | Pt | 12.49177 | 27.41920 | 17.24517 | Pt | 0 | 0 | 0.00000 |
| HETATM | 90  | Pt | 12.49177 | 10.67194 | 17.24517 | Pt | 0 | 0 | 0.00000 |
| HETATM | 91  | Pt | 12.49177 | 16.25436 | 17.24517 | Pt | 0 | 0 | 0.00000 |
| HETATM | 92  | Pt | 12.49177 | 21.83678 | 17.24517 | Pt | 0 | 0 | 0.00000 |
| HETATM | 93  | Pt | 17.32628 | 30.21041 | 17.24517 | Pt | 0 | 0 | 0.00000 |
| HETATM | 94  | Pt | 17.32628 | 13.46315 | 17.24517 | Pt | 0 | 0 | 0.00000 |
| HETATM | 95  | Pt | 17.32628 | 19.04557 | 17.24517 | Pt | 0 | 0 | 0.00000 |
| HETATM | 96  | Pt | 17.32628 | 24.62799 | 17.24517 | Pt | 0 | 0 | 0.00000 |
| HETATM | 97  | Pt | 5.23999  | 20.44117 | 17.24517 | Pt | 0 | 0 | 0.00000 |
| HETATM | 98  | Pt | 5.23999  | 3.69391  | 17.24517 | Pt | 0 | 0 | 0.00000 |
| HETATM | 99  | Pt | 5.23999  | 9.27633  | 17.24517 | Pt | 0 | 0 | 0.00000 |
| HETATM | 100 | Pt | 5.23999  | 14.85875 | 17.24517 | Pt | 0 | 0 | 0.00000 |
| HETATM | 101 | Pt | 10.07451 | 23.23238 | 17.24517 | Pt | 0 | 0 | 0.00000 |
| HETATM | 102 | Pt | 10.07451 | 6.48512  | 17.24517 | Pt | 0 | 0 | 0.00000 |
| HETATM | 103 | Pt | 10.07451 | 12.06754 | 17.24517 | Pt | 0 | 0 | 0.00000 |
| HETATM | 104 | Pt | 10.07451 | 17.64996 | 17.24517 | Pt | 0 | 0 | 0.00000 |
| HETATM | 105 | Pt | 14.90903 | 26.02359 | 17.24517 | Pt | 0 | 0 | 0.00000 |
| HETATM | 106 | Pt | 14.90903 | 9.27633  | 17.24517 | Pt | 0 | 0 | 0.00000 |
| HETATM | 107 | Pt | 14.90903 | 14.85875 | 17.24517 | Pt | 0 | 0 | 0.00000 |
| HETATM | 108 | Pt | 14.90903 | 20.44117 | 17.24517 | Pt | 0 | 0 | 0.00000 |
| HETATM | 109 | Pt | 0.40547  | 17.64996 | 17.24517 | Pt | 0 | 0 | 0.00000 |
| HETATM | 110 | Pt | 0.40547  | 0.90270  | 17.24517 | Pt | 0 | 0 | 0.00000 |
| HETATM | 111 | Pt | 0.40547  | 6.48512  | 17.24517 | Pt | 0 | 0 | 0.00000 |
| HETATM | 112 | Pt | 0.40547  | 12.06754 | 17.24517 | Pt | 0 | 0 | 0.00000 |
| HETATM | 113 | Pt | 5.23999  | 23.23238 | 17.24517 | Pt | 0 | 0 | 0.00000 |
| HETATM | 114 | Pt | 5.23999  | 6.48512  | 17.24517 | Pt | 0 | 0 | 0.00000 |
| HETATM | 115 | Pt | 5.23999  | 12.06754 | 17.24517 | Pt | 0 | 0 | 0.00000 |
| HETATM | 116 | Pt | 5.23999  | 17.64996 | 17.24517 | Pt | 0 | 0 | 0.00000 |
| HETATM | 117 | Pt | 10.07451 | 26.02359 | 17.24517 | Pt | 0 | 0 | 0.00000 |
| HETATM | 118 | Pt | 10.07451 | 9.27633  | 17.24517 | Pt | 0 | 0 | 0.00000 |
| HETATM | 119 | Pt | 10.07451 | 14.85875 | 17.24517 | Pt | 0 | 0 | 0.00000 |
| HETATM | 120 | Pt | 10.07451 | 20.44117 | 17.24517 | Pt | 0 | 0 | 0.00000 |

|        |     |    |          |          |          |    |   |   |         |
|--------|-----|----|----------|----------|----------|----|---|---|---------|
| HETATM | 121 | Pt | 14.90903 | 28.81480 | 17.24517 | Pt | 0 | 0 | 0.00000 |
| HETATM | 122 | Pt | 14.90903 | 12.06754 | 17.24517 | Pt | 0 | 0 | 0.00000 |
| HETATM | 123 | Pt | 14.90903 | 17.64996 | 17.24517 | Pt | 0 | 0 | 0.00000 |
| HETATM | 124 | Pt | 14.90903 | 23.23238 | 17.24517 | Pt | 0 | 0 | 0.00000 |
| HETATM | 125 | Pt | 0.40547  | 20.44117 | 17.24517 | Pt | 0 | 0 | 0.00000 |
| HETATM | 126 | Pt | 0.40547  | 3.69391  | 17.24517 | Pt | 0 | 0 | 0.00000 |
| HETATM | 127 | Pt | 0.40547  | 9.27633  | 17.24517 | Pt | 0 | 0 | 0.00000 |
| HETATM | 128 | Pt | 0.40547  | 14.85875 | 17.24517 | Pt | 0 | 0 | 0.00000 |
| HETATM | 129 | Pt | 3.62810  | 20.44051 | 19.52419 | Pt | 0 | 0 | 0.00000 |
| HETATM | 130 | Pt | 3.62857  | 3.69382  | 19.52278 | Pt | 0 | 0 | 0.00000 |
| HETATM | 131 | Pt | 3.62777  | 9.27644  | 19.52424 | Pt | 0 | 0 | 0.00000 |
| HETATM | 132 | Pt | 3.62817  | 14.85841 | 19.52416 | Pt | 0 | 0 | 0.00000 |
| HETATM | 133 | Pt | 8.46288  | 23.23241 | 19.52278 | Pt | 0 | 0 | 0.00000 |
| HETATM | 134 | Pt | 8.46286  | 6.48488  | 19.52335 | Pt | 0 | 0 | 0.00000 |
| HETATM | 135 | Pt | 8.46255  | 12.06725 | 19.52415 | Pt | 0 | 0 | 0.00000 |
| HETATM | 136 | Pt | 8.46230  | 17.64977 | 19.52392 | Pt | 0 | 0 | 0.00000 |
| HETATM | 137 | Pt | 13.29796 | 26.02303 | 19.52425 | Pt | 0 | 0 | 0.00000 |
| HETATM | 138 | Pt | 13.29750 | 9.27580  | 19.52415 | Pt | 0 | 0 | 0.00000 |
| HETATM | 139 | Pt | 13.29751 | 14.85874 | 19.52239 | Pt | 0 | 0 | 0.00000 |
| HETATM | 140 | Pt | 13.29776 | 20.44065 | 19.52457 | Pt | 0 | 0 | 0.00000 |
| HETATM | 141 | Pt | 18.13190 | 28.81436 | 19.52416 | Pt | 0 | 0 | 0.00000 |
| HETATM | 142 | Pt | 18.13223 | 12.06684 | 19.52392 | Pt | 0 | 0 | 0.00000 |
| HETATM | 143 | Pt | 18.13146 | 17.64991 | 19.52457 | Pt | 0 | 0 | 0.00000 |
| HETATM | 144 | Pt | 18.13178 | 23.23193 | 19.52432 | Pt | 0 | 0 | 0.00000 |
| HETATM | 145 | Pt | 3.62825  | 23.23254 | 19.52357 | Pt | 0 | 0 | 0.00000 |
| HETATM | 146 | Pt | 3.62788  | 6.48603  | 19.52375 | Pt | 0 | 0 | 0.00000 |
| HETATM | 147 | Pt | 3.62802  | 12.06812 | 19.52415 | Pt | 0 | 0 | 0.00000 |
| HETATM | 148 | Pt | 3.62820  | 17.65010 | 19.52426 | Pt | 0 | 0 | 0.00000 |
| HETATM | 149 | Pt | 8.46317  | 26.02420 | 19.52294 | Pt | 0 | 0 | 0.00000 |
| HETATM | 150 | Pt | 8.46236  | 9.27646  | 19.52351 | Pt | 0 | 0 | 0.00000 |
| HETATM | 151 | Pt | 8.46254  | 14.85919 | 19.52438 | Pt | 0 | 0 | 0.00000 |
| HETATM | 152 | Pt | 8.46256  | 20.44162 | 19.52339 | Pt | 0 | 0 | 0.00000 |
| HETATM | 153 | Pt | 13.29788 | 28.81519 | 19.52431 | Pt | 0 | 0 | 0.00000 |
| HETATM | 154 | Pt | 13.29757 | 12.06743 | 19.52236 | Pt | 0 | 0 | 0.00000 |
| HETATM | 155 | Pt | 13.29733 | 17.65064 | 19.52411 | Pt | 0 | 0 | 0.00000 |
| HETATM | 156 | Pt | 13.29797 | 23.23223 | 19.52465 | Pt | 0 | 0 | 0.00000 |
| HETATM | 157 | Pt | 18.13168 | 31.60618 | 19.52459 | Pt | 0 | 0 | 0.00000 |
| HETATM | 158 | Pt | 18.13247 | 14.85912 | 19.52328 | Pt | 0 | 0 | 0.00000 |
| HETATM | 159 | Pt | 18.13138 | 20.44148 | 19.52509 | Pt | 0 | 0 | 0.00000 |
| HETATM | 160 | Pt | 18.13193 | 26.02383 | 19.52408 | Pt | 0 | 0 | 0.00000 |
| HETATM | 161 | Pt | 6.04600  | 21.83665 | 19.52357 | Pt | 0 | 0 | 0.00000 |
| HETATM | 162 | Pt | 6.04618  | 5.08997  | 19.52294 | Pt | 0 | 0 | 0.00000 |
| HETATM | 163 | Pt | 6.04590  | 10.67244 | 19.52431 | Pt | 0 | 0 | 0.00000 |
| HETATM | 164 | Pt | 6.04606  | 16.25413 | 19.52459 | Pt | 0 | 0 | 0.00000 |
| HETATM | 165 | Pt | 10.88135 | 24.62792 | 19.52375 | Pt | 0 | 0 | 0.00000 |
| HETATM | 166 | Pt | 10.88070 | 7.88023  | 19.52351 | Pt | 0 | 0 | 0.00000 |
| HETATM | 167 | Pt | 10.88014 | 13.46313 | 19.52236 | Pt | 0 | 0 | 0.00000 |
| HETATM | 168 | Pt | 10.88036 | 19.04612 | 19.52328 | Pt | 0 | 0 | 0.00000 |
| HETATM | 169 | Pt | 15.71551 | 27.41908 | 19.52415 | Pt | 0 | 0 | 0.00000 |
| HETATM | 170 | Pt | 15.71539 | 10.67175 | 19.52438 | Pt | 0 | 0 | 0.00000 |
| HETATM | 171 | Pt | 15.71546 | 16.25453 | 19.52411 | Pt | 0 | 0 | 0.00000 |
| HETATM | 172 | Pt | 15.71537 | 21.83636 | 19.52509 | Pt | 0 | 0 | 0.00000 |
| HETATM | 173 | Pt | 1.21148  | 19.04539 | 19.52426 | Pt | 0 | 0 | 0.00000 |
| HETATM | 174 | Pt | 1.21184  | 2.29815  | 19.52339 | Pt | 0 | 0 | 0.00000 |
| HETATM | 175 | Pt | 1.21086  | 7.88104  | 19.52465 | Pt | 0 | 0 | 0.00000 |
| HETATM | 176 | Pt | 1.21149  | 13.46317 | 19.52408 | Pt | 0 | 0 | 0.00000 |
| HETATM | 177 | Pt | 6.04587  | 24.62821 | 19.52433 | Pt | 0 | 0 | 0.00000 |
| HETATM | 178 | Pt | 6.04529  | 7.88117  | 19.52529 | Pt | 0 | 0 | 0.00000 |
| HETATM | 179 | Pt | 6.04567  | 13.46332 | 19.52616 | Pt | 0 | 0 | 0.00000 |
| HETATM | 180 | Pt | 6.04552  | 19.04528 | 19.52583 | Pt | 0 | 0 | 0.00000 |
| HETATM | 181 | Pt | 10.88088 | 27.41902 | 19.52529 | Pt | 0 | 0 | 0.00000 |
| HETATM | 182 | Pt | 10.87978 | 10.67111 | 19.52415 | Pt | 0 | 0 | 0.00000 |
| HETATM | 183 | Pt | 10.87959 | 16.25514 | 19.52435 | Pt | 0 | 0 | 0.00000 |

|        |     |    |          |          |          |    |   |   |         |
|--------|-----|----|----------|----------|----------|----|---|---|---------|
| HETATM | 184 | Pt | 10.88057 | 21.83706 | 19.52492 | Pt | 0 | 0 | 0.00000 |
| HETATM | 185 | Pt | 15.71496 | 30.21043 | 19.52616 | Pt | 0 | 0 | 0.00000 |
| HETATM | 186 | Pt | 15.71579 | 13.46296 | 19.52435 | Pt | 0 | 0 | 0.00000 |
| HETATM | 187 | Pt | 15.71476 | 19.04553 | 19.52682 | Pt | 0 | 0 | 0.00000 |
| HETATM | 188 | Pt | 15.71509 | 24.62770 | 19.52588 | Pt | 0 | 0 | 0.00000 |
| HETATM | 189 | Pt | 1.21109  | 21.83644 | 19.52583 | Pt | 0 | 0 | 0.00000 |
| HETATM | 190 | Pt | 1.21132  | 5.08993  | 19.52492 | Pt | 0 | 0 | 0.00000 |
| HETATM | 191 | Pt | 1.21082  | 10.67206 | 19.52588 | Pt | 0 | 0 | 0.00000 |
| HETATM | 192 | Pt | 1.21118  | 16.25429 | 19.52565 | Pt | 0 | 0 | 0.00000 |
| HETATM | 193 | Pt | 2.01721  | 17.65036 | 21.80538 | Pt | 0 | 0 | 0.00000 |
| HETATM | 194 | Pt | 2.01724  | 23.23283 | 21.80451 | Pt | 0 | 0 | 0.00000 |
| HETATM | 195 | Pt | 2.01666  | 6.48648  | 21.80514 | Pt | 0 | 0 | 0.00000 |
| HETATM | 196 | Pt | 2.01690  | 12.06834 | 21.80535 | Pt | 0 | 0 | 0.00000 |
| HETATM | 197 | Pt | 6.85176  | 20.44163 | 21.80451 | Pt | 0 | 0 | 0.00000 |
| HETATM | 198 | Pt | 6.85237  | 26.02511 | 21.80250 | Pt | 0 | 0 | 0.00000 |
| HETATM | 199 | Pt | 6.85135  | 9.27791  | 21.80472 | Pt | 0 | 0 | 0.00000 |
| HETATM | 200 | Pt | 6.85210  | 14.85924 | 21.80695 | Pt | 0 | 0 | 0.00000 |
| HETATM | 201 | Pt | 11.68735 | 23.23279 | 21.80514 | Pt | 0 | 0 | 0.00000 |
| HETATM | 202 | Pt | 11.68745 | 28.81546 | 21.80472 | Pt | 0 | 0 | 0.00000 |
| HETATM | 203 | Pt | 11.68563 | 12.06688 | 21.79954 | Pt | 0 | 0 | 0.00000 |
| HETATM | 204 | Pt | 11.68534 | 17.65209 | 21.80340 | Pt | 0 | 0 | 0.00000 |
| HETATM | 205 | Pt | 16.52126 | 26.02392 | 21.80535 | Pt | 0 | 0 | 0.00000 |
| HETATM | 206 | Pt | 16.52065 | 31.60678 | 21.80696 | Pt | 0 | 0 | 0.00000 |
| HETATM | 207 | Pt | 16.52271 | 14.85923 | 21.80340 | Pt | 0 | 0 | 0.00000 |
| HETATM | 208 | Pt | 16.52048 | 20.44109 | 21.80854 | Pt | 0 | 0 | 0.00000 |
| HETATM | 209 | Pt | 2.01699  | 20.43997 | 21.80567 | Pt | 0 | 0 | 0.00000 |
| HETATM | 210 | Pt | 2.01851  | 3.69340  | 21.80227 | Pt | 0 | 0 | 0.00000 |
| HETATM | 211 | Pt | 2.01639  | 9.27588  | 21.80581 | Pt | 0 | 0 | 0.00000 |
| HETATM | 212 | Pt | 2.01717  | 14.85785 | 21.80524 | Pt | 0 | 0 | 0.00000 |
| HETATM | 213 | Pt | 6.85188  | 23.23226 | 21.80273 | Pt | 0 | 0 | 0.00000 |
| HETATM | 214 | Pt | 6.85196  | 6.48518  | 21.80342 | Pt | 0 | 0 | 0.00000 |
| HETATM | 215 | Pt | 6.85213  | 12.06776 | 21.80643 | Pt | 0 | 0 | 0.00000 |
| HETATM | 216 | Pt | 6.85161  | 17.64847 | 21.80615 | Pt | 0 | 0 | 0.00000 |
| HETATM | 217 | Pt | 11.68753 | 26.02271 | 21.80496 | Pt | 0 | 0 | 0.00000 |
| HETATM | 218 | Pt | 11.68602 | 9.27457  | 21.80373 | Pt | 0 | 0 | 0.00000 |
| HETATM | 219 | Pt | 11.68524 | 14.85945 | 21.79975 | Pt | 0 | 0 | 0.00000 |
| HETATM | 220 | Pt | 11.68668 | 20.44102 | 21.80387 | Pt | 0 | 0 | 0.00000 |
| HETATM | 221 | Pt | 16.52123 | 28.81387 | 21.80554 | Pt | 0 | 0 | 0.00000 |
| HETATM | 222 | Pt | 16.52210 | 12.06640 | 21.80505 | Pt | 0 | 0 | 0.00000 |
| HETATM | 223 | Pt | 16.52033 | 17.64919 | 21.80743 | Pt | 0 | 0 | 0.00000 |
| HETATM | 224 | Pt | 16.52110 | 23.23103 | 21.80607 | Pt | 0 | 0 | 0.00000 |
| HETATM | 225 | Pt | 4.43319  | 19.04498 | 21.80567 | Pt | 0 | 0 | 0.00000 |
| HETATM | 226 | Pt | 4.43394  | 24.62826 | 21.80273 | Pt | 0 | 0 | 0.00000 |
| HETATM | 227 | Pt | 4.43271  | 7.88160  | 21.80496 | Pt | 0 | 0 | 0.00000 |
| HETATM | 228 | Pt | 4.43308  | 13.46329 | 21.80554 | Pt | 0 | 0 | 0.00000 |
| HETATM | 229 | Pt | 9.26754  | 21.83784 | 21.80227 | Pt | 0 | 0 | 0.00000 |
| HETATM | 230 | Pt | 9.26857  | 27.41963 | 21.80342 | Pt | 0 | 0 | 0.00000 |
| HETATM | 231 | Pt | 9.26723  | 10.67106 | 21.80373 | Pt | 0 | 0 | 0.00000 |
| HETATM | 232 | Pt | 9.26698  | 16.25515 | 21.80504 | Pt | 0 | 0 | 0.00000 |
| HETATM | 233 | Pt | 14.10317 | 24.62725 | 21.80581 | Pt | 0 | 0 | 0.00000 |
| HETATM | 234 | Pt | 14.10314 | 30.21107 | 21.80643 | Pt | 0 | 0 | 0.00000 |
| HETATM | 235 | Pt | 14.10426 | 13.46282 | 21.79975 | Pt | 0 | 0 | 0.00000 |
| HETATM | 236 | Pt | 14.10270 | 19.04501 | 21.80743 | Pt | 0 | 0 | 0.00000 |
| HETATM | 237 | Pt | 18.93692 | 27.41891 | 21.80524 | Pt | 0 | 0 | 0.00000 |
| HETATM | 238 | Pt | 18.93644 | 33.00097 | 21.80615 | Pt | 0 | 0 | 0.00000 |
| HETATM | 239 | Pt | 18.93733 | 16.25486 | 21.80387 | Pt | 0 | 0 | 0.00000 |
| HETATM | 240 | Pt | 18.93633 | 21.83659 | 21.80607 | Pt | 0 | 0 | 0.00000 |
| HETATM | 241 | Pt | 4.43403  | 21.83642 | 21.79871 | Pt | 0 | 0 | 0.00000 |
| HETATM | 242 | Pt | 4.43459  | 5.09039  | 21.79716 | Pt | 0 | 0 | 0.00000 |
| HETATM | 243 | Pt | 4.43381  | 10.67270 | 21.79957 | Pt | 0 | 0 | 0.00000 |
| HETATM | 244 | Pt | 4.43409  | 16.25395 | 21.79980 | Pt | 0 | 0 | 0.00000 |
| HETATM | 245 | Pt | 9.26934  | 24.62873 | 21.79716 | Pt | 0 | 0 | 0.00000 |
| HETATM | 246 | Pt | 9.26894  | 7.88105  | 21.79827 | Pt | 0 | 0 | 0.00000 |

|        |     |    |          |          |          |    |   |   |         |
|--------|-----|----|----------|----------|----------|----|---|---|---------|
| HETATM | 247 | Pt | 9.26873  | 13.46342 | 21.79932 | Pt | 0 | 0 | 0.00000 |
| HETATM | 248 | Pt | 9.26833  | 19.04544 | 21.79831 | Pt | 0 | 0 | 0.00000 |
| HETATM | 249 | Pt | 14.10415 | 27.41921 | 21.79958 | Pt | 0 | 0 | 0.00000 |
| HETATM | 250 | Pt | 14.10352 | 10.67206 | 21.79932 | Pt | 0 | 0 | 0.00000 |
| HETATM | 251 | Pt | 14.10342 | 16.25462 | 21.79839 | Pt | 0 | 0 | 0.00000 |
| HETATM | 252 | Pt | 14.10406 | 21.83532 | 21.80157 | Pt | 0 | 0 | 0.00000 |
| HETATM | 253 | Pt | 18.93750 | 30.21008 | 21.79980 | Pt | 0 | 0 | 0.00000 |
| HETATM | 254 | Pt | 18.93790 | 13.46272 | 21.79831 | Pt | 0 | 0 | 0.00000 |
| HETATM | 255 | Pt | 18.93614 | 19.04553 | 21.80157 | Pt | 0 | 0 | 0.00000 |
| HETATM | 256 | Pt | 18.93764 | 24.62772 | 21.79943 | Pt | 0 | 0 | 0.00000 |
| HETATM | 257 | Pt | 2.82225  | 19.04473 | 24.09283 | Pt | 0 | 0 | 0.00000 |
| HETATM | 258 | Pt | 2.82479  | 2.29823  | 24.08851 | Pt | 0 | 0 | 0.00000 |
| HETATM | 259 | Pt | 2.82187  | 7.88125  | 24.09265 | Pt | 0 | 0 | 0.00000 |
| HETATM | 260 | Pt | 2.82222  | 13.46283 | 24.09248 | Pt | 0 | 0 | 0.00000 |
| HETATM | 261 | Pt | 7.65615  | 21.83852 | 24.08851 | Pt | 0 | 0 | 0.00000 |
| HETATM | 262 | Pt | 7.65781  | 5.09049  | 24.08884 | Pt | 0 | 0 | 0.00000 |
| HETATM | 263 | Pt | 7.65718  | 10.67370 | 24.09251 | Pt | 0 | 0 | 0.00000 |
| HETATM | 264 | Pt | 7.65754  | 16.25219 | 24.09611 | Pt | 0 | 0 | 0.00000 |
| HETATM | 265 | Pt | 12.49265 | 24.62751 | 24.09266 | Pt | 0 | 0 | 0.00000 |
| HETATM | 266 | Pt | 12.49333 | 7.88155  | 24.09251 | Pt | 0 | 0 | 0.00000 |
| HETATM | 267 | Pt | 12.49223 | 13.46395 | 24.07331 | Pt | 0 | 0 | 0.00000 |
| HETATM | 268 | Pt | 12.49151 | 19.04657 | 24.09119 | Pt | 0 | 0 | 0.00000 |
| HETATM | 269 | Pt | 17.32627 | 27.41860 | 24.09248 | Pt | 0 | 0 | 0.00000 |
| HETATM | 270 | Pt | 17.32426 | 10.67111 | 24.09611 | Pt | 0 | 0 | 0.00000 |
| HETATM | 271 | Pt | 17.32728 | 16.25463 | 24.09119 | Pt | 0 | 0 | 0.00000 |
| HETATM | 272 | Pt | 17.32565 | 21.83569 | 24.09452 | Pt | 0 | 0 | 0.00000 |
| HETATM | 273 | Pt | 2.82827  | 21.83639 | 24.07953 | Pt | 0 | 0 | 0.00000 |
| HETATM | 274 | Pt | 2.83046  | 5.09025  | 24.07676 | Pt | 0 | 0 | 0.00000 |
| HETATM | 275 | Pt | 2.82821  | 10.67212 | 24.08015 | Pt | 0 | 0 | 0.00000 |
| HETATM | 276 | Pt | 2.82860  | 16.25374 | 24.08004 | Pt | 0 | 0 | 0.00000 |
| HETATM | 277 | Pt | 7.66374  | 24.62949 | 24.07601 | Pt | 0 | 0 | 0.00000 |
| HETATM | 278 | Pt | 7.66373  | 7.88182  | 24.07710 | Pt | 0 | 0 | 0.00000 |
| HETATM | 279 | Pt | 7.66571  | 13.46420 | 24.08434 | Pt | 0 | 0 | 0.00000 |
| HETATM | 280 | Pt | 7.66369  | 19.04447 | 24.07913 | Pt | 0 | 0 | 0.00000 |
| HETATM | 281 | Pt | 12.49907 | 27.41971 | 24.07966 | Pt | 0 | 0 | 0.00000 |
| HETATM | 282 | Pt | 12.49510 | 10.66986 | 24.07526 | Pt | 0 | 0 | 0.00000 |
| HETATM | 283 | Pt | 12.49497 | 16.25686 | 24.07378 | Pt | 0 | 0 | 0.00000 |
| HETATM | 284 | Pt | 12.49865 | 21.83548 | 24.08114 | Pt | 0 | 0 | 0.00000 |
| HETATM | 285 | Pt | 17.33178 | 30.21001 | 24.08102 | Pt | 0 | 0 | 0.00000 |
| HETATM | 286 | Pt | 17.33048 | 13.46249 | 24.08124 | Pt | 0 | 0 | 0.00000 |
| HETATM | 287 | Pt | 17.32928 | 19.04400 | 24.08718 | Pt | 0 | 0 | 0.00000 |
| HETATM | 288 | Pt | 17.33220 | 24.62713 | 24.08030 | Pt | 0 | 0 | 0.00000 |
| HETATM | 289 | Pt | 5.23688  | 20.44578 | 24.07953 | Pt | 0 | 0 | 0.00000 |
| HETATM | 290 | Pt | 5.23804  | 3.70029  | 24.07601 | Pt | 0 | 0 | 0.00000 |
| HETATM | 291 | Pt | 5.23678  | 9.28291  | 24.07965 | Pt | 0 | 0 | 0.00000 |
| HETATM | 292 | Pt | 5.23690  | 14.86332 | 24.08102 | Pt | 0 | 0 | 0.00000 |
| HETATM | 293 | Pt | 10.07128 | 23.23945 | 24.07676 | Pt | 0 | 0 | 0.00000 |
| HETATM | 294 | Pt | 10.07222 | 6.49128  | 24.07710 | Pt | 0 | 0 | 0.00000 |
| HETATM | 295 | Pt | 10.07104 | 12.06939 | 24.07526 | Pt | 0 | 0 | 0.00000 |
| HETATM | 296 | Pt | 10.07184 | 17.65326 | 24.08124 | Pt | 0 | 0 | 0.00000 |
| HETATM | 297 | Pt | 14.90645 | 26.02843 | 24.08015 | Pt | 0 | 0 | 0.00000 |
| HETATM | 298 | Pt | 14.90571 | 9.28419  | 24.08435 | Pt | 0 | 0 | 0.00000 |
| HETATM | 299 | Pt | 14.90959 | 14.86278 | 24.07378 | Pt | 0 | 0 | 0.00000 |
| HETATM | 300 | Pt | 14.90618 | 20.44298 | 24.08718 | Pt | 0 | 0 | 0.00000 |
| HETATM | 301 | Pt | 0.40201  | 17.65473 | 24.08004 | Pt | 0 | 0 | 0.00000 |
| HETATM | 302 | Pt | 0.40130  | 0.90773  | 24.07913 | Pt | 0 | 0 | 0.00000 |
| HETATM | 303 | Pt | 0.40091  | 6.49043  | 24.08114 | Pt | 0 | 0 | 0.00000 |
| HETATM | 304 | Pt | 0.40177  | 12.07224 | 24.08030 | Pt | 0 | 0 | 0.00000 |
| HETATM | 305 | Pt | 5.23711  | 23.22739 | 24.07685 | Pt | 0 | 0 | 0.00000 |
| HETATM | 306 | Pt | 5.23744  | 6.48111  | 24.07778 | Pt | 0 | 0 | 0.00000 |
| HETATM | 307 | Pt | 5.23719  | 12.06326 | 24.08075 | Pt | 0 | 0 | 0.00000 |
| HETATM | 308 | Pt | 5.23715  | 17.64341 | 24.08102 | Pt | 0 | 0 | 0.00000 |
| HETATM | 309 | Pt | 10.07231 | 26.01937 | 24.07778 | Pt | 0 | 0 | 0.00000 |

|        |     |    |          |          |          |    |   |   |         |
|--------|-----|----|----------|----------|----------|----|---|---|---------|
| HETATM | 310 | Pt | 10.07244 | 9.27275  | 24.08036 | Pt | 0 | 0 | 0.00000 |
| HETATM | 311 | Pt | 10.07081 | 14.85715 | 24.07825 | Pt | 0 | 0 | 0.00000 |
| HETATM | 312 | Pt | 10.06951 | 20.43841 | 24.07344 | Pt | 0 | 0 | 0.00000 |
| HETATM | 313 | Pt | 14.90672 | 28.81024 | 24.08076 | Pt | 0 | 0 | 0.00000 |
| HETATM | 314 | Pt | 14.90949 | 12.06354 | 24.07825 | Pt | 0 | 0 | 0.00000 |
| HETATM | 315 | Pt | 14.90499 | 17.64298 | 24.08528 | Pt | 0 | 0 | 0.00000 |
| HETATM | 316 | Pt | 14.90620 | 23.22535 | 24.08137 | Pt | 0 | 0 | 0.00000 |
| HETATM | 317 | Pt | 0.40123  | 20.43543 | 24.08102 | Pt | 0 | 0 | 0.00000 |
| HETATM | 318 | Pt | 0.40558  | 3.68820  | 24.07344 | Pt | 0 | 0 | 0.00000 |
| HETATM | 319 | Pt | 0.40079  | 9.27037  | 24.08137 | Pt | 0 | 0 | 0.00000 |
| HETATM | 320 | Pt | 0.40207  | 14.85286 | 24.07986 | Pt | 0 | 0 | 0.00000 |
| HETATM | 321 | Pt | 3.62304  | 20.43174 | 26.38225 | Pt | 0 | 0 | 0.00000 |
| HETATM | 322 | Pt | 3.62738  | 3.68643  | 26.37874 | Pt | 0 | 0 | 0.00000 |
| HETATM | 323 | Pt | 3.62444  | 9.26916  | 26.38299 | Pt | 0 | 0 | 0.00000 |
| HETATM | 324 | Pt | 3.62401  | 14.84977 | 26.38301 | Pt | 0 | 0 | 0.00000 |
| HETATM | 325 | Pt | 8.45707  | 23.22769 | 26.37874 | Pt | 0 | 0 | 0.00000 |
| HETATM | 326 | Pt | 8.45831  | 6.47699  | 26.37804 | Pt | 0 | 0 | 0.00000 |
| HETATM | 327 | Pt | 8.46250  | 12.06331 | 26.38795 | Pt | 0 | 0 | 0.00000 |
| HETATM | 328 | Pt | 8.46050  | 17.63918 | 26.38230 | Pt | 0 | 0 | 0.00000 |
| HETATM | 329 | Pt | 13.29333 | 26.01650 | 26.38299 | Pt | 0 | 0 | 0.00000 |
| HETATM | 330 | Pt | 13.29410 | 9.27377  | 26.38795 | Pt | 0 | 0 | 0.00000 |
| HETATM | 331 | Pt | 13.29637 | 14.85676 | 26.35202 | Pt | 0 | 0 | 0.00000 |
| HETATM | 332 | Pt | 13.29122 | 20.42889 | 26.39029 | Pt | 0 | 0 | 0.00000 |
| HETATM | 333 | Pt | 18.12650 | 28.80644 | 26.38301 | Pt | 0 | 0 | 0.00000 |
| HETATM | 334 | Pt | 18.12395 | 12.05999 | 26.38230 | Pt | 0 | 0 | 0.00000 |
| HETATM | 335 | Pt | 18.12455 | 17.63836 | 26.39029 | Pt | 0 | 0 | 0.00000 |
| HETATM | 336 | Pt | 18.12638 | 23.22258 | 26.38380 | Pt | 0 | 0 | 0.00000 |
| HETATM | 337 | Pt | 3.62571  | 23.23956 | 26.38006 | Pt | 0 | 0 | 0.00000 |
| HETATM | 338 | Pt | 3.62577  | 6.49445  | 26.38112 | Pt | 0 | 0 | 0.00000 |
| HETATM | 339 | Pt | 3.62446  | 12.07526 | 26.38299 | Pt | 0 | 0 | 0.00000 |
| HETATM | 340 | Pt | 3.62419  | 17.65630 | 26.38356 | Pt | 0 | 0 | 0.00000 |
| HETATM | 341 | Pt | 8.45882  | 26.03315 | 26.37909 | Pt | 0 | 0 | 0.00000 |
| HETATM | 342 | Pt | 8.45978  | 9.28454  | 26.37702 | Pt | 0 | 0 | 0.00000 |
| HETATM | 343 | Pt | 8.46643  | 14.86300 | 26.39841 | Pt | 0 | 0 | 0.00000 |
| HETATM | 344 | Pt | 8.45358  | 20.45414 | 26.37574 | Pt | 0 | 0 | 0.00000 |
| HETATM | 345 | Pt | 13.29293 | 28.82567 | 26.38315 | Pt | 0 | 0 | 0.00000 |
| HETATM | 346 | Pt | 13.29096 | 12.07381 | 26.35073 | Pt | 0 | 0 | 0.00000 |
| HETATM | 347 | Pt | 13.28528 | 17.65547 | 26.38389 | Pt | 0 | 0 | 0.00000 |
| HETATM | 348 | Pt | 13.29228 | 23.23912 | 26.38451 | Pt | 0 | 0 | 0.00000 |
| HETATM | 349 | Pt | 18.12366 | 31.61484 | 26.38526 | Pt | 0 | 0 | 0.00000 |
| HETATM | 350 | Pt | 18.13944 | 14.86259 | 26.36721 | Pt | 0 | 0 | 0.00000 |
| HETATM | 351 | Pt | 18.12556 | 20.44612 | 26.38631 | Pt | 0 | 0 | 0.00000 |
| HETATM | 352 | Pt | 18.12680 | 26.03051 | 26.38291 | Pt | 0 | 0 | 0.00000 |
| HETATM | 353 | Pt | 6.05334  | 21.83796 | 26.38006 | Pt | 0 | 0 | 0.00000 |
| HETATM | 354 | Pt | 6.05611  | 5.09068  | 26.37909 | Pt | 0 | 0 | 0.00000 |
| HETATM | 355 | Pt | 6.05745  | 10.67340 | 26.38315 | Pt | 0 | 0 | 0.00000 |
| HETATM | 356 | Pt | 6.05757  | 16.25152 | 26.38526 | Pt | 0 | 0 | 0.00000 |
| HETATM | 357 | Pt | 10.88970 | 24.63030 | 26.38112 | Pt | 0 | 0 | 0.00000 |
| HETATM | 358 | Pt | 10.88898 | 7.88204  | 26.37702 | Pt | 0 | 0 | 0.00000 |
| HETATM | 359 | Pt | 10.88897 | 13.46060 | 26.35073 | Pt | 0 | 0 | 0.00000 |
| HETATM | 360 | Pt | 10.87988 | 19.05390 | 26.36721 | Pt | 0 | 0 | 0.00000 |
| HETATM | 361 | Pt | 15.72347 | 27.41957 | 26.38299 | Pt | 0 | 0 | 0.00000 |
| HETATM | 362 | Pt | 15.71674 | 10.67703 | 26.39841 | Pt | 0 | 0 | 0.00000 |
| HETATM | 363 | Pt | 15.72567 | 16.24651 | 26.38389 | Pt | 0 | 0 | 0.00000 |
| HETATM | 364 | Pt | 15.72230 | 21.83364 | 26.38631 | Pt | 0 | 0 | 0.00000 |
| HETATM | 365 | Pt | 1.21886  | 19.04501 | 26.38356 | Pt | 0 | 0 | 0.00000 |
| HETATM | 366 | Pt | 1.22717  | 2.29663  | 26.37574 | Pt | 0 | 0 | 0.00000 |
| HETATM | 367 | Pt | 1.21968  | 7.87956  | 26.38451 | Pt | 0 | 0 | 0.00000 |
| HETATM | 368 | Pt | 1.21983  | 13.46207 | 26.38291 | Pt | 0 | 0 | 0.00000 |
| HETATM | 369 | Pt | 6.04655  | 24.62939 | 26.30176 | Pt | 0 | 0 | 0.00000 |
| HETATM | 370 | Pt | 6.04689  | 7.88178  | 26.30450 | Pt | 0 | 0 | 0.00000 |
| HETATM | 371 | Pt | 6.04733  | 13.46332 | 26.30966 | Pt | 0 | 0 | 0.00000 |
| HETATM | 372 | Pt | 6.04648  | 19.04459 | 26.30682 | Pt | 0 | 0 | 0.00000 |

|        |     |    |          |          |          |    |   |   |         |
|--------|-----|----|----------|----------|----------|----|---|---|---------|
| HETATM | 373 | Pt | 10.88059 | 27.42072 | 26.30450 | Pt | 0 | 0 | 0.00000 |
| HETATM | 374 | Pt | 10.88376 | 10.67800 | 26.31810 | Pt | 0 | 0 | 0.00000 |
| HETATM | 375 | Pt | 10.88998 | 16.24758 | 26.32121 | Pt | 0 | 0 | 0.00000 |
| HETATM | 376 | Pt | 10.87754 | 21.84059 | 26.30164 | Pt | 0 | 0 | 0.00000 |
| HETATM | 377 | Pt | 15.71414 | 30.21186 | 26.30966 | Pt | 0 | 0 | 0.00000 |
| HETATM | 378 | Pt | 15.70405 | 13.46817 | 26.32121 | Pt | 0 | 0 | 0.00000 |
| HETATM | 379 | Pt | 15.70995 | 19.03721 | 26.32562 | Pt | 0 | 0 | 0.00000 |
| HETATM | 380 | Pt | 15.71420 | 24.62664 | 26.30722 | Pt | 0 | 0 | 0.00000 |
| HETATM | 381 | Pt | 1.21001  | 21.83692 | 26.30682 | Pt | 0 | 0 | 0.00000 |
| HETATM | 382 | Pt | 1.21589  | 5.08907  | 26.30164 | Pt | 0 | 0 | 0.00000 |
| HETATM | 383 | Pt | 1.21035  | 10.67077 | 26.30722 | Pt | 0 | 0 | 0.00000 |
| HETATM | 384 | Pt | 1.21072  | 16.25349 | 26.30664 | Pt | 0 | 0 | 0.00000 |
| HETATM | 385 | Pt | 2.02805  | 17.66914 | 28.76032 | Pt | 0 | 0 | 0.00000 |
| HETATM | 386 | Pt | 2.03626  | 23.25112 | 28.76029 | Pt | 0 | 0 | 0.00000 |
| HETATM | 387 | Pt | 2.03697  | 6.50818  | 28.76059 | Pt | 0 | 0 | 0.00000 |
| HETATM | 388 | Pt | 2.03164  | 12.08873 | 28.75955 | Pt | 0 | 0 | 0.00000 |
| HETATM | 389 | Pt | 6.85808  | 20.46724 | 28.76029 | Pt | 0 | 0 | 0.00000 |
| HETATM | 390 | Pt | 6.86488  | 26.04678 | 28.75649 | Pt | 0 | 0 | 0.00000 |
| HETATM | 391 | Pt | 6.87080  | 9.30031  | 28.75825 | Pt | 0 | 0 | 0.00000 |
| HETATM | 392 | Pt | 6.87545  | 14.87935 | 28.76715 | Pt | 0 | 0 | 0.00000 |
| HETATM | 393 | Pt | 11.69598 | 23.26122 | 28.76059 | Pt | 0 | 0 | 0.00000 |
| HETATM | 394 | Pt | 11.69713 | 28.84350 | 28.75825 | Pt | 0 | 0 | 0.00000 |
| HETATM | 395 | Pt | 11.68663 | 12.06860 | 28.63378 | Pt | 0 | 0 | 0.00000 |
| HETATM | 396 | Pt | 11.66359 | 17.68690 | 28.69952 | Pt | 0 | 0 | 0.00000 |
| HETATM | 397 | Pt | 16.53155 | 26.04688 | 28.75955 | Pt | 0 | 0 | 0.00000 |
| HETATM | 398 | Pt | 16.52640 | 31.63706 | 28.76715 | Pt | 0 | 0 | 0.00000 |
| HETATM | 399 | Pt | 16.56373 | 14.85781 | 28.69952 | Pt | 0 | 0 | 0.00000 |
| HETATM | 400 | Pt | 16.53188 | 20.46084 | 28.76373 | Pt | 0 | 0 | 0.00000 |
| HETATM | 401 | Pt | 2.02872  | 20.41634 | 28.76086 | Pt | 0 | 0 | 0.00000 |
| HETATM | 402 | Pt | 2.03790  | 3.67028  | 28.75643 | Pt | 0 | 0 | 0.00000 |
| HETATM | 403 | Pt | 2.03161  | 9.25493  | 28.76109 | Pt | 0 | 0 | 0.00000 |
| HETATM | 404 | Pt | 2.03037  | 14.83471 | 28.76031 | Pt | 0 | 0 | 0.00000 |
| HETATM | 405 | Pt | 6.86130  | 23.21398 | 28.75596 | Pt | 0 | 0 | 0.00000 |
| HETATM | 406 | Pt | 6.86435  | 6.46346  | 28.75841 | Pt | 0 | 0 | 0.00000 |
| HETATM | 407 | Pt | 6.87259  | 12.03965 | 28.76574 | Pt | 0 | 0 | 0.00000 |
| HETATM | 408 | Pt | 6.85965  | 17.62641 | 28.76125 | Pt | 0 | 0 | 0.00000 |
| HETATM | 409 | Pt | 11.69902 | 26.00669 | 28.76014 | Pt | 0 | 0 | 0.00000 |
| HETATM | 410 | Pt | 11.68313 | 9.26563  | 28.73718 | Pt | 0 | 0 | 0.00000 |
| HETATM | 411 | Pt | 11.67958 | 14.84415 | 28.75295 | Pt | 0 | 0 | 0.00000 |
| HETATM | 412 | Pt | 11.68417 | 20.43208 | 28.74965 | Pt | 0 | 0 | 0.00000 |
| HETATM | 413 | Pt | 16.53088 | 28.79592 | 28.76165 | Pt | 0 | 0 | 0.00000 |
| HETATM | 414 | Pt | 16.54619 | 12.05866 | 28.76782 | Pt | 0 | 0 | 0.00000 |
| HETATM | 415 | Pt | 16.55450 | 17.61233 | 28.80844 | Pt | 0 | 0 | 0.00000 |
| HETATM | 416 | Pt | 16.53161 | 23.20882 | 28.76139 | Pt | 0 | 0 | 0.00000 |
| HETATM | 417 | Pt | 4.40686  | 19.04332 | 28.76086 | Pt | 0 | 0 | 0.00000 |
| HETATM | 418 | Pt | 4.41340  | 24.62728 | 28.75596 | Pt | 0 | 0 | 0.00000 |
| HETATM | 419 | Pt | 4.41310  | 7.88354  | 28.76014 | Pt | 0 | 0 | 0.00000 |
| HETATM | 420 | Pt | 4.41271  | 13.46267 | 28.76165 | Pt | 0 | 0 | 0.00000 |
| HETATM | 421 | Pt | 9.23783  | 21.84307 | 28.75643 | Pt | 0 | 0 | 0.00000 |
| HETATM | 422 | Pt | 9.24357  | 27.41950 | 28.75841 | Pt | 0 | 0 | 0.00000 |
| HETATM | 423 | Pt | 9.26092  | 10.66409 | 28.73718 | Pt | 0 | 0 | 0.00000 |
| HETATM | 424 | Pt | 9.24823  | 16.27214 | 28.76782 | Pt | 0 | 0 | 0.00000 |
| HETATM | 425 | Pt | 14.07742 | 24.62996 | 28.76109 | Pt | 0 | 0 | 0.00000 |
| HETATM | 426 | Pt | 14.06857 | 30.21473 | 28.76574 | Pt | 0 | 0 | 0.00000 |
| HETATM | 427 | Pt | 14.09384 | 13.45027 | 28.75295 | Pt | 0 | 0 | 0.00000 |
| HETATM | 428 | Pt | 14.05370 | 19.05617 | 28.80844 | Pt | 0 | 0 | 0.00000 |
| HETATM | 429 | Pt | 18.91028 | 27.41877 | 28.76031 | Pt | 0 | 0 | 0.00000 |
| HETATM | 430 | Pt | 18.91332 | 32.99691 | 28.76125 | Pt | 0 | 0 | 0.00000 |
| HETATM | 431 | Pt | 18.93084 | 16.24821 | 28.74965 | Pt | 0 | 0 | 0.00000 |
| HETATM | 432 | Pt | 18.91184 | 21.83459 | 28.76139 | Pt | 0 | 0 | 0.00000 |
| HETATM | 433 | Pt | 4.43309  | 21.83479 | 28.58830 | Pt | 0 | 0 | 0.00000 |
| HETATM | 434 | Pt | 4.43717  | 5.09031  | 28.58693 | Pt | 0 | 0 | 0.00000 |
| HETATM | 435 | Pt | 4.43829  | 10.67261 | 28.59050 | Pt | 0 | 0 | 0.00000 |

|        |     |    |          |          |          |    |   |   |         |
|--------|-----|----|----------|----------|----------|----|---|---|---------|
| HETATM | 436 | Pt | 4.43559  | 16.25137 | 28.59115 | Pt | 0 | 0 | 0.00000 |
| HETATM | 437 | Pt | 9.26798  | 24.63092 | 28.58694 | Pt | 0 | 0 | 0.00000 |
| HETATM | 438 | Pt | 9.26566  | 7.87536  | 28.58380 | Pt | 0 | 0 | 0.00000 |
| HETATM | 439 | Pt | 9.28278  | 13.44532 | 28.62702 | Pt | 0 | 0 | 0.00000 |
| HETATM | 440 | Pt | 9.25097  | 19.05851 | 28.58014 | Pt | 0 | 0 | 0.00000 |
| HETATM | 441 | Pt | 14.10183 | 27.42305 | 28.59050 | Pt | 0 | 0 | 0.00000 |
| HETATM | 442 | Pt | 14.08082 | 10.67517 | 28.62702 | Pt | 0 | 0 | 0.00000 |
| HETATM | 443 | Pt | 14.10140 | 16.25111 | 28.66765 | Pt | 0 | 0 | 0.00000 |
| HETATM | 444 | Pt | 14.09958 | 21.83734 | 28.59520 | Pt | 0 | 0 | 0.00000 |
| HETATM | 445 | Pt | 18.93453 | 30.21008 | 28.59115 | Pt | 0 | 0 | 0.00000 |
| HETATM | 446 | Pt | 18.95789 | 13.45421 | 28.58014 | Pt | 0 | 0 | 0.00000 |
| HETATM | 447 | Pt | 18.94013 | 19.04266 | 28.59520 | Pt | 0 | 0 | 0.00000 |
| HETATM | 448 | Pt | 18.93701 | 24.62664 | 28.59101 | Pt | 0 | 0 | 0.00000 |
| HETATM | 449 | O  | 2.82146  | 19.04336 | 29.88022 | O  | 0 | 0 | 0.00000 |
| HETATM | 450 | O  | 2.83068  | 2.29810  | 29.87740 | O  | 0 | 0 | 0.00000 |
| HETATM | 451 | O  | 2.82728  | 7.88108  | 29.88026 | O  | 0 | 0 | 0.00000 |
| HETATM | 452 | O  | 2.82337  | 13.46145 | 29.87941 | O  | 0 | 0 | 0.00000 |
| HETATM | 453 | O  | 7.65309  | 21.84355 | 29.87740 | O  | 0 | 0 | 0.00000 |
| HETATM | 454 | O  | 7.65700  | 5.08909  | 29.87740 | O  | 0 | 0 | 0.00000 |
| HETATM | 455 | O  | 7.66542  | 10.66286 | 29.87350 | O  | 0 | 0 | 0.00000 |
| HETATM | 456 | O  | 7.65451  | 16.26222 | 29.88472 | O  | 0 | 0 | 0.00000 |
| HETATM | 457 | O  | 12.48980 | 24.63211 | 29.88027 | O  | 0 | 0 | 0.00000 |
| HETATM | 458 | O  | 12.47982 | 7.88326  | 29.87350 | O  | 0 | 0 | 0.00000 |
| HETATM | 459 | O  | 13.31052 | 14.88128 | 29.83071 | O  | 0 | 0 | 0.00000 |
| HETATM | 460 | O  | 12.43196 | 19.04677 | 29.87097 | O  | 0 | 0 | 0.00000 |
| HETATM | 461 | O  | 17.32449 | 27.41891 | 29.87941 | O  | 0 | 0 | 0.00000 |
| HETATM | 462 | O  | 17.33447 | 10.67350 | 29.88473 | O  | 0 | 0 | 0.00000 |
| HETATM | 463 | O  | 17.35723 | 16.20316 | 29.87097 | O  | 0 | 0 | 0.00000 |
| HETATM | 464 | O  | 17.32427 | 21.83330 | 29.88077 | O  | 0 | 0 | 0.00000 |

UNIT ENERGY kcal  
ENERGY -58954.651778  
END

XTLGRF 200

DESCRP TS

REMARK Pt111\_0.25ML\_8x8x7\_30.0\_vac fcc-displacement

FIXATOMS 1 128

CRYSTX 22.32968 22.32968 43.67409 90.00000 90.00000 60.00000

FORMAT ATOM (a6,1x,i5,1x,a5,1x,a3,1x,a1,1x,a5,3f10.5,1x,a5,i3,i2,1x,f8.5)

|        |    |    |          |          |          |    |   |   |         |
|--------|----|----|----------|----------|----------|----|---|---|---------|
| HETATM | 1  | Pt | 2.01698  | 17.64996 | 14.96615 | Pt | 0 | 0 | 0.00000 |
| HETATM | 2  | Pt | 2.01698  | 23.23238 | 14.96615 | Pt | 0 | 0 | 0.00000 |
| HETATM | 3  | Pt | 2.01698  | 6.48512  | 14.96615 | Pt | 0 | 0 | 0.00000 |
| HETATM | 4  | Pt | 2.01698  | 12.06754 | 14.96615 | Pt | 0 | 0 | 0.00000 |
| HETATM | 5  | Pt | 6.85150  | 20.44117 | 14.96615 | Pt | 0 | 0 | 0.00000 |
| HETATM | 6  | Pt | 6.85150  | 26.02359 | 14.96615 | Pt | 0 | 0 | 0.00000 |
| HETATM | 7  | Pt | 6.85150  | 9.27633  | 14.96615 | Pt | 0 | 0 | 0.00000 |
| HETATM | 8  | Pt | 6.85150  | 14.85875 | 14.96615 | Pt | 0 | 0 | 0.00000 |
| HETATM | 9  | Pt | 11.68602 | 23.23238 | 14.96615 | Pt | 0 | 0 | 0.00000 |
| HETATM | 10 | Pt | 11.68602 | 28.81480 | 14.96615 | Pt | 0 | 0 | 0.00000 |
| HETATM | 11 | Pt | 11.68602 | 12.06754 | 14.96615 | Pt | 0 | 0 | 0.00000 |
| HETATM | 12 | Pt | 11.68602 | 17.64996 | 14.96615 | Pt | 0 | 0 | 0.00000 |
| HETATM | 13 | Pt | 16.52053 | 26.02359 | 14.96615 | Pt | 0 | 0 | 0.00000 |
| HETATM | 14 | Pt | 16.52053 | 31.60601 | 14.96615 | Pt | 0 | 0 | 0.00000 |
| HETATM | 15 | Pt | 16.52053 | 14.85875 | 14.96615 | Pt | 0 | 0 | 0.00000 |
| HETATM | 16 | Pt | 16.52053 | 20.44117 | 14.96615 | Pt | 0 | 0 | 0.00000 |
| HETATM | 17 | Pt | 2.01698  | 20.44117 | 14.96615 | Pt | 0 | 0 | 0.00000 |
| HETATM | 18 | Pt | 2.01698  | 3.69391  | 14.96615 | Pt | 0 | 0 | 0.00000 |
| HETATM | 19 | Pt | 2.01698  | 9.27633  | 14.96615 | Pt | 0 | 0 | 0.00000 |
| HETATM | 20 | Pt | 2.01698  | 14.85875 | 14.96615 | Pt | 0 | 0 | 0.00000 |
| HETATM | 21 | Pt | 6.85150  | 23.23238 | 14.96615 | Pt | 0 | 0 | 0.00000 |
| HETATM | 22 | Pt | 6.85150  | 6.48512  | 14.96615 | Pt | 0 | 0 | 0.00000 |
| HETATM | 23 | Pt | 6.85150  | 12.06754 | 14.96615 | Pt | 0 | 0 | 0.00000 |
| HETATM | 24 | Pt | 6.85150  | 17.64996 | 14.96615 | Pt | 0 | 0 | 0.00000 |



|        |    |    |          |          |          |    |   |   |         |
|--------|----|----|----------|----------|----------|----|---|---|---------|
| HETATM | 25 | Pt | 11.68602 | 26.02359 | 14.96615 | Pt | 0 | 0 | 0.00000 |
| HETATM | 26 | Pt | 11.68602 | 9.27633  | 14.96615 | Pt | 0 | 0 | 0.00000 |
| HETATM | 27 | Pt | 11.68602 | 14.85875 | 14.96615 | Pt | 0 | 0 | 0.00000 |
| HETATM | 28 | Pt | 11.68602 | 20.44117 | 14.96615 | Pt | 0 | 0 | 0.00000 |
| HETATM | 29 | Pt | 16.52053 | 28.81480 | 14.96615 | Pt | 0 | 0 | 0.00000 |
| HETATM | 30 | Pt | 16.52053 | 12.06754 | 14.96615 | Pt | 0 | 0 | 0.00000 |
| HETATM | 31 | Pt | 16.52053 | 17.64996 | 14.96615 | Pt | 0 | 0 | 0.00000 |
| HETATM | 32 | Pt | 16.52053 | 23.23238 | 14.96615 | Pt | 0 | 0 | 0.00000 |
| HETATM | 33 | Pt | 4.43424  | 19.04557 | 14.96615 | Pt | 0 | 0 | 0.00000 |
| HETATM | 34 | Pt | 4.43424  | 24.62799 | 14.96615 | Pt | 0 | 0 | 0.00000 |
| HETATM | 35 | Pt | 4.43424  | 7.88073  | 14.96615 | Pt | 0 | 0 | 0.00000 |
| HETATM | 36 | Pt | 4.43424  | 13.46315 | 14.96615 | Pt | 0 | 0 | 0.00000 |
| HETATM | 37 | Pt | 9.26876  | 21.83678 | 14.96615 | Pt | 0 | 0 | 0.00000 |
| HETATM | 38 | Pt | 9.26876  | 27.41920 | 14.96615 | Pt | 0 | 0 | 0.00000 |
| HETATM | 39 | Pt | 9.26876  | 10.67194 | 14.96615 | Pt | 0 | 0 | 0.00000 |
| HETATM | 40 | Pt | 9.26876  | 16.25436 | 14.96615 | Pt | 0 | 0 | 0.00000 |
| HETATM | 41 | Pt | 14.10328 | 24.62799 | 14.96615 | Pt | 0 | 0 | 0.00000 |
| HETATM | 42 | Pt | 14.10328 | 30.21041 | 14.96615 | Pt | 0 | 0 | 0.00000 |
| HETATM | 43 | Pt | 14.10328 | 13.46315 | 14.96615 | Pt | 0 | 0 | 0.00000 |
| HETATM | 44 | Pt | 14.10328 | 19.04557 | 14.96615 | Pt | 0 | 0 | 0.00000 |
| HETATM | 45 | Pt | 18.93779 | 27.41920 | 14.96615 | Pt | 0 | 0 | 0.00000 |
| HETATM | 46 | Pt | 18.93779 | 33.00162 | 14.96615 | Pt | 0 | 0 | 0.00000 |
| HETATM | 47 | Pt | 18.93779 | 16.25436 | 14.96615 | Pt | 0 | 0 | 0.00000 |
| HETATM | 48 | Pt | 18.93779 | 21.83678 | 14.96615 | Pt | 0 | 0 | 0.00000 |
| HETATM | 49 | Pt | 4.43424  | 21.83678 | 14.96615 | Pt | 0 | 0 | 0.00000 |
| HETATM | 50 | Pt | 4.43424  | 5.08952  | 14.96615 | Pt | 0 | 0 | 0.00000 |
| HETATM | 51 | Pt | 4.43424  | 10.67194 | 14.96615 | Pt | 0 | 0 | 0.00000 |
| HETATM | 52 | Pt | 4.43424  | 16.25436 | 14.96615 | Pt | 0 | 0 | 0.00000 |
| HETATM | 53 | Pt | 9.26876  | 24.62799 | 14.96615 | Pt | 0 | 0 | 0.00000 |
| HETATM | 54 | Pt | 9.26876  | 7.88073  | 14.96615 | Pt | 0 | 0 | 0.00000 |
| HETATM | 55 | Pt | 9.26876  | 13.46315 | 14.96615 | Pt | 0 | 0 | 0.00000 |
| HETATM | 56 | Pt | 9.26876  | 19.04557 | 14.96615 | Pt | 0 | 0 | 0.00000 |
| HETATM | 57 | Pt | 14.10328 | 27.41920 | 14.96615 | Pt | 0 | 0 | 0.00000 |
| HETATM | 58 | Pt | 14.10328 | 10.67194 | 14.96615 | Pt | 0 | 0 | 0.00000 |
| HETATM | 59 | Pt | 14.10328 | 16.25436 | 14.96615 | Pt | 0 | 0 | 0.00000 |
| HETATM | 60 | Pt | 14.10328 | 21.83678 | 14.96615 | Pt | 0 | 0 | 0.00000 |
| HETATM | 61 | Pt | 18.93779 | 30.21041 | 14.96615 | Pt | 0 | 0 | 0.00000 |
| HETATM | 62 | Pt | 18.93779 | 13.46315 | 14.96615 | Pt | 0 | 0 | 0.00000 |
| HETATM | 63 | Pt | 18.93779 | 19.04557 | 14.96615 | Pt | 0 | 0 | 0.00000 |
| HETATM | 64 | Pt | 18.93779 | 24.62799 | 14.96615 | Pt | 0 | 0 | 0.00000 |
| HETATM | 65 | Pt | 2.82273  | 19.04557 | 17.24517 | Pt | 0 | 0 | 0.00000 |
| HETATM | 66 | Pt | 2.82273  | 2.29831  | 17.24517 | Pt | 0 | 0 | 0.00000 |
| HETATM | 67 | Pt | 2.82273  | 7.88073  | 17.24517 | Pt | 0 | 0 | 0.00000 |
| HETATM | 68 | Pt | 2.82273  | 13.46315 | 17.24517 | Pt | 0 | 0 | 0.00000 |
| HETATM | 69 | Pt | 7.65725  | 21.83678 | 17.24517 | Pt | 0 | 0 | 0.00000 |
| HETATM | 70 | Pt | 7.65725  | 5.08952  | 17.24517 | Pt | 0 | 0 | 0.00000 |
| HETATM | 71 | Pt | 7.65725  | 10.67194 | 17.24517 | Pt | 0 | 0 | 0.00000 |
| HETATM | 72 | Pt | 7.65725  | 16.25436 | 17.24517 | Pt | 0 | 0 | 0.00000 |
| HETATM | 73 | Pt | 12.49177 | 24.62799 | 17.24517 | Pt | 0 | 0 | 0.00000 |
| HETATM | 74 | Pt | 12.49177 | 7.88073  | 17.24517 | Pt | 0 | 0 | 0.00000 |
| HETATM | 75 | Pt | 12.49177 | 13.46315 | 17.24517 | Pt | 0 | 0 | 0.00000 |
| HETATM | 76 | Pt | 12.49177 | 19.04557 | 17.24517 | Pt | 0 | 0 | 0.00000 |
| HETATM | 77 | Pt | 17.32628 | 27.41920 | 17.24517 | Pt | 0 | 0 | 0.00000 |
| HETATM | 78 | Pt | 17.32628 | 10.67194 | 17.24517 | Pt | 0 | 0 | 0.00000 |
| HETATM | 79 | Pt | 17.32628 | 16.25436 | 17.24517 | Pt | 0 | 0 | 0.00000 |
| HETATM | 80 | Pt | 17.32628 | 21.83678 | 17.24517 | Pt | 0 | 0 | 0.00000 |
| HETATM | 81 | Pt | 2.82273  | 21.83678 | 17.24517 | Pt | 0 | 0 | 0.00000 |
| HETATM | 82 | Pt | 2.82273  | 5.08952  | 17.24517 | Pt | 0 | 0 | 0.00000 |
| HETATM | 83 | Pt | 2.82273  | 10.67194 | 17.24517 | Pt | 0 | 0 | 0.00000 |
| HETATM | 84 | Pt | 2.82273  | 16.25436 | 17.24517 | Pt | 0 | 0 | 0.00000 |
| HETATM | 85 | Pt | 7.65725  | 24.62799 | 17.24517 | Pt | 0 | 0 | 0.00000 |
| HETATM | 86 | Pt | 7.65725  | 7.88073  | 17.24517 | Pt | 0 | 0 | 0.00000 |
| HETATM | 87 | Pt | 7.65725  | 13.46315 | 17.24517 | Pt | 0 | 0 | 0.00000 |

|        |     |    |          |          |          |    |   |   |         |
|--------|-----|----|----------|----------|----------|----|---|---|---------|
| HETATM | 88  | Pt | 7.65725  | 19.04557 | 17.24517 | Pt | 0 | 0 | 0.00000 |
| HETATM | 89  | Pt | 12.49177 | 27.41920 | 17.24517 | Pt | 0 | 0 | 0.00000 |
| HETATM | 90  | Pt | 12.49177 | 10.67194 | 17.24517 | Pt | 0 | 0 | 0.00000 |
| HETATM | 91  | Pt | 12.49177 | 16.25436 | 17.24517 | Pt | 0 | 0 | 0.00000 |
| HETATM | 92  | Pt | 12.49177 | 21.83678 | 17.24517 | Pt | 0 | 0 | 0.00000 |
| HETATM | 93  | Pt | 17.32628 | 30.21041 | 17.24517 | Pt | 0 | 0 | 0.00000 |
| HETATM | 94  | Pt | 17.32628 | 13.46315 | 17.24517 | Pt | 0 | 0 | 0.00000 |
| HETATM | 95  | Pt | 17.32628 | 19.04557 | 17.24517 | Pt | 0 | 0 | 0.00000 |
| HETATM | 96  | Pt | 17.32628 | 24.62799 | 17.24517 | Pt | 0 | 0 | 0.00000 |
| HETATM | 97  | Pt | 5.23999  | 20.44117 | 17.24517 | Pt | 0 | 0 | 0.00000 |
| HETATM | 98  | Pt | 5.23999  | 3.69391  | 17.24517 | Pt | 0 | 0 | 0.00000 |
| HETATM | 99  | Pt | 5.23999  | 9.27633  | 17.24517 | Pt | 0 | 0 | 0.00000 |
| HETATM | 100 | Pt | 5.23999  | 14.85875 | 17.24517 | Pt | 0 | 0 | 0.00000 |
| HETATM | 101 | Pt | 10.07451 | 23.23238 | 17.24517 | Pt | 0 | 0 | 0.00000 |
| HETATM | 102 | Pt | 10.07451 | 6.48512  | 17.24517 | Pt | 0 | 0 | 0.00000 |
| HETATM | 103 | Pt | 10.07451 | 12.06754 | 17.24517 | Pt | 0 | 0 | 0.00000 |
| HETATM | 104 | Pt | 10.07451 | 17.64996 | 17.24517 | Pt | 0 | 0 | 0.00000 |
| HETATM | 105 | Pt | 14.90903 | 26.02359 | 17.24517 | Pt | 0 | 0 | 0.00000 |
| HETATM | 106 | Pt | 14.90903 | 9.27633  | 17.24517 | Pt | 0 | 0 | 0.00000 |
| HETATM | 107 | Pt | 14.90903 | 14.85875 | 17.24517 | Pt | 0 | 0 | 0.00000 |
| HETATM | 108 | Pt | 14.90903 | 20.44117 | 17.24517 | Pt | 0 | 0 | 0.00000 |
| HETATM | 109 | Pt | 0.40547  | 17.64996 | 17.24517 | Pt | 0 | 0 | 0.00000 |
| HETATM | 110 | Pt | 0.40547  | 0.90270  | 17.24517 | Pt | 0 | 0 | 0.00000 |
| HETATM | 111 | Pt | 0.40547  | 6.48512  | 17.24517 | Pt | 0 | 0 | 0.00000 |
| HETATM | 112 | Pt | 0.40547  | 12.06754 | 17.24517 | Pt | 0 | 0 | 0.00000 |
| HETATM | 113 | Pt | 5.23999  | 23.23238 | 17.24517 | Pt | 0 | 0 | 0.00000 |
| HETATM | 114 | Pt | 5.23999  | 6.48512  | 17.24517 | Pt | 0 | 0 | 0.00000 |
| HETATM | 115 | Pt | 5.23999  | 12.06754 | 17.24517 | Pt | 0 | 0 | 0.00000 |
| HETATM | 116 | Pt | 5.23999  | 17.64996 | 17.24517 | Pt | 0 | 0 | 0.00000 |
| HETATM | 117 | Pt | 10.07451 | 26.02359 | 17.24517 | Pt | 0 | 0 | 0.00000 |
| HETATM | 118 | Pt | 10.07451 | 9.27633  | 17.24517 | Pt | 0 | 0 | 0.00000 |
| HETATM | 119 | Pt | 10.07451 | 14.85875 | 17.24517 | Pt | 0 | 0 | 0.00000 |
| HETATM | 120 | Pt | 10.07451 | 20.44117 | 17.24517 | Pt | 0 | 0 | 0.00000 |
| HETATM | 121 | Pt | 14.90903 | 28.81480 | 17.24517 | Pt | 0 | 0 | 0.00000 |
| HETATM | 122 | Pt | 14.90903 | 12.06754 | 17.24517 | Pt | 0 | 0 | 0.00000 |
| HETATM | 123 | Pt | 14.90903 | 17.64996 | 17.24517 | Pt | 0 | 0 | 0.00000 |
| HETATM | 124 | Pt | 14.90903 | 23.23238 | 17.24517 | Pt | 0 | 0 | 0.00000 |
| HETATM | 125 | Pt | 0.40547  | 20.44117 | 17.24517 | Pt | 0 | 0 | 0.00000 |
| HETATM | 126 | Pt | 0.40547  | 3.69391  | 17.24517 | Pt | 0 | 0 | 0.00000 |
| HETATM | 127 | Pt | 0.40547  | 9.27633  | 17.24517 | Pt | 0 | 0 | 0.00000 |
| HETATM | 128 | Pt | 0.40547  | 14.85875 | 17.24517 | Pt | 0 | 0 | 0.00000 |
| HETATM | 129 | Pt | 3.62830  | 20.44061 | 19.52404 | Pt | 0 | 0 | 0.00000 |
| HETATM | 130 | Pt | 3.62851  | 3.69371  | 19.52334 | Pt | 0 | 0 | 0.00000 |
| HETATM | 131 | Pt | 3.62821  | 9.27630  | 19.52402 | Pt | 0 | 0 | 0.00000 |
| HETATM | 132 | Pt | 3.62836  | 14.85854 | 19.52395 | Pt | 0 | 0 | 0.00000 |
| HETATM | 133 | Pt | 8.46302  | 23.23173 | 19.52338 | Pt | 0 | 0 | 0.00000 |
| HETATM | 134 | Pt | 8.46253  | 6.48481  | 19.52343 | Pt | 0 | 0 | 0.00000 |
| HETATM | 135 | Pt | 8.46301  | 12.06785 | 19.52391 | Pt | 0 | 0 | 0.00000 |
| HETATM | 136 | Pt | 8.46251  | 17.64984 | 19.52441 | Pt | 0 | 0 | 0.00000 |
| HETATM | 137 | Pt | 13.29747 | 26.02330 | 19.52351 | Pt | 0 | 0 | 0.00000 |
| HETATM | 138 | Pt | 13.29724 | 9.27577  | 19.52330 | Pt | 0 | 0 | 0.00000 |
| HETATM | 139 | Pt | 13.29736 | 14.85906 | 19.52286 | Pt | 0 | 0 | 0.00000 |
| HETATM | 140 | Pt | 13.29753 | 20.44045 | 19.52393 | Pt | 0 | 0 | 0.00000 |
| HETATM | 141 | Pt | 18.13190 | 28.81444 | 19.52387 | Pt | 0 | 0 | 0.00000 |
| HETATM | 142 | Pt | 18.13262 | 12.06710 | 19.52330 | Pt | 0 | 0 | 0.00000 |
| HETATM | 143 | Pt | 18.13127 | 17.64982 | 19.52455 | Pt | 0 | 0 | 0.00000 |
| HETATM | 144 | Pt | 18.13216 | 23.23203 | 19.52355 | Pt | 0 | 0 | 0.00000 |
| HETATM | 145 | Pt | 3.62852  | 23.23258 | 19.52364 | Pt | 0 | 0 | 0.00000 |
| HETATM | 146 | Pt | 3.62802  | 6.48582  | 19.52393 | Pt | 0 | 0 | 0.00000 |
| HETATM | 147 | Pt | 3.62846  | 12.06819 | 19.52387 | Pt | 0 | 0 | 0.00000 |
| HETATM | 148 | Pt | 3.62828  | 17.65028 | 19.52412 | Pt | 0 | 0 | 0.00000 |
| HETATM | 149 | Pt | 8.46282  | 26.02393 | 19.52315 | Pt | 0 | 0 | 0.00000 |
| HETATM | 150 | Pt | 8.46238  | 9.27658  | 19.52318 | Pt | 0 | 0 | 0.00000 |

|        |     |    |          |          |          |    |   |   |         |
|--------|-----|----|----------|----------|----------|----|---|---|---------|
| HETATM | 151 | Pt | 8.46287  | 14.85984 | 19.52439 | Pt | 0 | 0 | 0.00000 |
| HETATM | 152 | Pt | 8.46297  | 20.44098 | 19.52425 | Pt | 0 | 0 | 0.00000 |
| HETATM | 153 | Pt | 13.29750 | 28.81521 | 19.52365 | Pt | 0 | 0 | 0.00000 |
| HETATM | 154 | Pt | 13.29773 | 12.06769 | 19.52141 | Pt | 0 | 0 | 0.00000 |
| HETATM | 155 | Pt | 13.29676 | 17.65039 | 19.52515 | Pt | 0 | 0 | 0.00000 |
| HETATM | 156 | Pt | 13.29767 | 23.23257 | 19.52327 | Pt | 0 | 0 | 0.00000 |
| HETATM | 157 | Pt | 18.13189 | 31.60625 | 19.52393 | Pt | 0 | 0 | 0.00000 |
| HETATM | 158 | Pt | 18.13235 | 14.85935 | 19.52330 | Pt | 0 | 0 | 0.00000 |
| HETATM | 159 | Pt | 18.13187 | 20.44141 | 19.52398 | Pt | 0 | 0 | 0.00000 |
| HETATM | 160 | Pt | 18.13194 | 26.02402 | 19.52382 | Pt | 0 | 0 | 0.00000 |
| HETATM | 161 | Pt | 6.04633  | 21.83655 | 19.52372 | Pt | 0 | 0 | 0.00000 |
| HETATM | 162 | Pt | 6.04605  | 5.08968  | 19.52333 | Pt | 0 | 0 | 0.00000 |
| HETATM | 163 | Pt | 6.04633  | 10.67248 | 19.52401 | Pt | 0 | 0 | 0.00000 |
| HETATM | 164 | Pt | 6.04610  | 16.25439 | 19.52417 | Pt | 0 | 0 | 0.00000 |
| HETATM | 165 | Pt | 10.88087 | 24.62794 | 19.52310 | Pt | 0 | 0 | 0.00000 |
| HETATM | 166 | Pt | 10.88032 | 7.88031  | 19.52308 | Pt | 0 | 0 | 0.00000 |
| HETATM | 167 | Pt | 10.88054 | 13.46390 | 19.52252 | Pt | 0 | 0 | 0.00000 |
| HETATM | 168 | Pt | 10.88049 | 19.04543 | 19.52470 | Pt | 0 | 0 | 0.00000 |
| HETATM | 169 | Pt | 15.71533 | 27.41922 | 19.52378 | Pt | 0 | 0 | 0.00000 |
| HETATM | 170 | Pt | 15.71558 | 10.67185 | 19.52343 | Pt | 0 | 0 | 0.00000 |
| HETATM | 171 | Pt | 15.71482 | 16.25460 | 19.52461 | Pt | 0 | 0 | 0.00000 |
| HETATM | 172 | Pt | 15.71562 | 21.83655 | 19.52356 | Pt | 0 | 0 | 0.00000 |
| HETATM | 173 | Pt | 1.21166  | 19.04551 | 19.52396 | Pt | 0 | 0 | 0.00000 |
| HETATM | 174 | Pt | 1.21205  | 2.29835  | 19.52352 | Pt | 0 | 0 | 0.00000 |
| HETATM | 175 | Pt | 1.21127  | 7.88087  | 19.52432 | Pt | 0 | 0 | 0.00000 |
| HETATM | 176 | Pt | 1.21180  | 13.46331 | 19.52381 | Pt | 0 | 0 | 0.00000 |
| HETATM | 177 | Pt | 6.04595  | 24.62790 | 19.52492 | Pt | 0 | 0 | 0.00000 |
| HETATM | 178 | Pt | 6.04538  | 7.88102  | 19.52526 | Pt | 0 | 0 | 0.00000 |
| HETATM | 179 | Pt | 6.04598  | 13.46346 | 19.52564 | Pt | 0 | 0 | 0.00000 |
| HETATM | 180 | Pt | 6.04557  | 19.04548 | 19.52564 | Pt | 0 | 0 | 0.00000 |
| HETATM | 181 | Pt | 10.88027 | 27.41910 | 19.52484 | Pt | 0 | 0 | 0.00000 |
| HETATM | 182 | Pt | 10.87986 | 10.67145 | 19.52340 | Pt | 0 | 0 | 0.00000 |
| HETATM | 183 | Pt | 10.87977 | 16.25535 | 19.52569 | Pt | 0 | 0 | 0.00000 |
| HETATM | 184 | Pt | 10.88052 | 21.83647 | 19.52500 | Pt | 0 | 0 | 0.00000 |
| HETATM | 185 | Pt | 15.71491 | 30.21038 | 19.52541 | Pt | 0 | 0 | 0.00000 |
| HETATM | 186 | Pt | 15.71594 | 13.46325 | 19.52358 | Pt | 0 | 0 | 0.00000 |
| HETATM | 187 | Pt | 15.71450 | 19.04539 | 19.52608 | Pt | 0 | 0 | 0.00000 |
| HETATM | 188 | Pt | 15.71502 | 24.62799 | 19.52509 | Pt | 0 | 0 | 0.00000 |
| HETATM | 189 | Pt | 1.21144  | 21.83654 | 19.52542 | Pt | 0 | 0 | 0.00000 |
| HETATM | 190 | Pt | 1.21130  | 5.08989  | 19.52519 | Pt | 0 | 0 | 0.00000 |
| HETATM | 191 | Pt | 1.21143  | 10.67205 | 19.52533 | Pt | 0 | 0 | 0.00000 |
| HETATM | 192 | Pt | 1.21127  | 16.25444 | 19.52544 | Pt | 0 | 0 | 0.00000 |
| HETATM | 193 | Pt | 2.01736  | 17.65060 | 21.80488 | Pt | 0 | 0 | 0.00000 |
| HETATM | 194 | Pt | 2.01774  | 23.23297 | 21.80407 | Pt | 0 | 0 | 0.00000 |
| HETATM | 195 | Pt | 2.01689  | 6.48639  | 21.80513 | Pt | 0 | 0 | 0.00000 |
| HETATM | 196 | Pt | 2.01773  | 12.06862 | 21.80450 | Pt | 0 | 0 | 0.00000 |
| HETATM | 197 | Pt | 6.85219  | 20.44159 | 21.80472 | Pt | 0 | 0 | 0.00000 |
| HETATM | 198 | Pt | 6.85191  | 26.02453 | 21.80330 | Pt | 0 | 0 | 0.00000 |
| HETATM | 199 | Pt | 6.85134  | 9.27774  | 21.80419 | Pt | 0 | 0 | 0.00000 |
| HETATM | 200 | Pt | 6.85227  | 14.85969 | 21.80543 | Pt | 0 | 0 | 0.00000 |
| HETATM | 201 | Pt | 11.68690 | 23.23322 | 21.80284 | Pt | 0 | 0 | 0.00000 |
| HETATM | 202 | Pt | 11.68644 | 28.81533 | 21.80349 | Pt | 0 | 0 | 0.00000 |
| HETATM | 203 | Pt | 11.68617 | 12.06728 | 21.79783 | Pt | 0 | 0 | 0.00000 |
| HETATM | 204 | Pt | 11.68561 | 17.65120 | 21.80820 | Pt | 0 | 0 | 0.00000 |
| HETATM | 205 | Pt | 16.52112 | 26.02423 | 21.80437 | Pt | 0 | 0 | 0.00000 |
| HETATM | 206 | Pt | 16.52082 | 31.60677 | 21.80480 | Pt | 0 | 0 | 0.00000 |
| HETATM | 207 | Pt | 16.52228 | 14.85944 | 21.80330 | Pt | 0 | 0 | 0.00000 |
| HETATM | 208 | Pt | 16.52138 | 20.44154 | 21.80506 | Pt | 0 | 0 | 0.00000 |
| HETATM | 209 | Pt | 2.01742  | 20.44011 | 21.80498 | Pt | 0 | 0 | 0.00000 |
| HETATM | 210 | Pt | 2.01803  | 3.69332  | 21.80336 | Pt | 0 | 0 | 0.00000 |
| HETATM | 211 | Pt | 2.01723  | 9.27591  | 21.80490 | Pt | 0 | 0 | 0.00000 |
| HETATM | 212 | Pt | 2.01752  | 14.85808 | 21.80471 | Pt | 0 | 0 | 0.00000 |
| HETATM | 213 | Pt | 6.85234  | 23.23145 | 21.80375 | Pt | 0 | 0 | 0.00000 |

|        |     |    |          |          |          |    |   |   |         |
|--------|-----|----|----------|----------|----------|----|---|---|---------|
| HETATM | 214 | Pt | 6.85156  | 6.48479  | 21.80369 | Pt | 0 | 0 | 0.00000 |
| HETATM | 215 | Pt | 6.85282  | 12.06800 | 21.80525 | Pt | 0 | 0 | 0.00000 |
| HETATM | 216 | Pt | 6.85139  | 17.64912 | 21.80529 | Pt | 0 | 0 | 0.00000 |
| HETATM | 217 | Pt | 11.68648 | 26.02303 | 21.80353 | Pt | 0 | 0 | 0.00000 |
| HETATM | 218 | Pt | 11.68542 | 9.27454  | 21.80241 | Pt | 0 | 0 | 0.00000 |
| HETATM | 219 | Pt | 11.68597 | 14.86060 | 21.80219 | Pt | 0 | 0 | 0.00000 |
| HETATM | 220 | Pt | 11.68695 | 20.43989 | 21.80460 | Pt | 0 | 0 | 0.00000 |
| HETATM | 221 | Pt | 16.52103 | 28.81394 | 21.80457 | Pt | 0 | 0 | 0.00000 |
| HETATM | 222 | Pt | 16.52279 | 12.06664 | 21.80292 | Pt | 0 | 0 | 0.00000 |
| HETATM | 223 | Pt | 16.51934 | 17.64921 | 21.80700 | Pt | 0 | 0 | 0.00000 |
| HETATM | 224 | Pt | 16.52162 | 23.23147 | 21.80370 | Pt | 0 | 0 | 0.00000 |
| HETATM | 225 | Pt | 4.43324  | 19.04534 | 21.80523 | Pt | 0 | 0 | 0.00000 |
| HETATM | 226 | Pt | 4.43386  | 24.62798 | 21.80351 | Pt | 0 | 0 | 0.00000 |
| HETATM | 227 | Pt | 4.43291  | 7.88133  | 21.80476 | Pt | 0 | 0 | 0.00000 |
| HETATM | 228 | Pt | 4.43357  | 13.46352 | 21.80473 | Pt | 0 | 0 | 0.00000 |
| HETATM | 229 | Pt | 9.26825  | 21.83617 | 21.80386 | Pt | 0 | 0 | 0.00000 |
| HETATM | 230 | Pt | 9.26759  | 27.41946 | 21.80327 | Pt | 0 | 0 | 0.00000 |
| HETATM | 231 | Pt | 9.26720  | 10.67102 | 21.80236 | Pt | 0 | 0 | 0.00000 |
| HETATM | 232 | Pt | 9.26756  | 16.25600 | 21.80670 | Pt | 0 | 0 | 0.00000 |
| HETATM | 233 | Pt | 14.10271 | 24.62796 | 21.80354 | Pt | 0 | 0 | 0.00000 |
| HETATM | 234 | Pt | 14.10251 | 30.21070 | 21.80442 | Pt | 0 | 0 | 0.00000 |
| HETATM | 235 | Pt | 14.10478 | 13.46305 | 21.79818 | Pt | 0 | 0 | 0.00000 |
| HETATM | 236 | Pt | 14.10216 | 19.04500 | 21.80671 | Pt | 0 | 0 | 0.00000 |
| HETATM | 237 | Pt | 18.93694 | 27.41915 | 21.80458 | Pt | 0 | 0 | 0.00000 |
| HETATM | 238 | Pt | 18.93720 | 33.00117 | 21.80457 | Pt | 0 | 0 | 0.00000 |
| HETATM | 239 | Pt | 18.93712 | 16.25496 | 21.80411 | Pt | 0 | 0 | 0.00000 |
| HETATM | 240 | Pt | 18.93740 | 21.83678 | 21.80418 | Pt | 0 | 0 | 0.00000 |
| HETATM | 241 | Pt | 4.43445  | 21.83645 | 21.79844 | Pt | 0 | 0 | 0.00000 |
| HETATM | 242 | Pt | 4.43420  | 5.09000  | 21.79786 | Pt | 0 | 0 | 0.00000 |
| HETATM | 243 | Pt | 4.43445  | 10.67271 | 21.79874 | Pt | 0 | 0 | 0.00000 |
| HETATM | 244 | Pt | 4.43426  | 16.25434 | 21.79914 | Pt | 0 | 0 | 0.00000 |
| HETATM | 245 | Pt | 9.26885  | 24.62830 | 21.79700 | Pt | 0 | 0 | 0.00000 |
| HETATM | 246 | Pt | 9.26843  | 7.88110  | 21.79804 | Pt | 0 | 0 | 0.00000 |
| HETATM | 247 | Pt | 9.26991  | 13.46503 | 21.79911 | Pt | 0 | 0 | 0.00000 |
| HETATM | 248 | Pt | 9.26927  | 19.04414 | 21.80116 | Pt | 0 | 0 | 0.00000 |
| HETATM | 249 | Pt | 14.10345 | 27.41929 | 21.79827 | Pt | 0 | 0 | 0.00000 |
| HETATM | 250 | Pt | 14.10334 | 10.67193 | 21.79671 | Pt | 0 | 0 | 0.00000 |
| HETATM | 251 | Pt | 14.10206 | 16.25453 | 21.80102 | Pt | 0 | 0 | 0.00000 |
| HETATM | 252 | Pt | 14.10420 | 21.83625 | 21.79754 | Pt | 0 | 0 | 0.00000 |
| HETATM | 253 | Pt | 18.93773 | 30.21027 | 21.79877 | Pt | 0 | 0 | 0.00000 |
| HETATM | 254 | Pt | 18.93810 | 13.46315 | 21.79803 | Pt | 0 | 0 | 0.00000 |
| HETATM | 255 | Pt | 18.93688 | 19.04551 | 21.79997 | Pt | 0 | 0 | 0.00000 |
| HETATM | 256 | Pt | 18.93804 | 24.62797 | 21.79836 | Pt | 0 | 0 | 0.00000 |
| HETATM | 257 | Pt | 2.82249  | 19.04498 | 24.09220 | Pt | 0 | 0 | 0.00000 |
| HETATM | 258 | Pt | 2.82375  | 2.29826  | 24.08956 | Pt | 0 | 0 | 0.00000 |
| HETATM | 259 | Pt | 2.82194  | 7.88131  | 24.09221 | Pt | 0 | 0 | 0.00000 |
| HETATM | 260 | Pt | 2.82309  | 13.46335 | 24.09172 | Pt | 0 | 0 | 0.00000 |
| HETATM | 261 | Pt | 7.65769  | 21.83698 | 24.09057 | Pt | 0 | 0 | 0.00000 |
| HETATM | 262 | Pt | 7.65673  | 5.09010  | 24.08952 | Pt | 0 | 0 | 0.00000 |
| HETATM | 263 | Pt | 7.65664  | 10.67328 | 24.09106 | Pt | 0 | 0 | 0.00000 |
| HETATM | 264 | Pt | 7.65676  | 16.25351 | 24.09307 | Pt | 0 | 0 | 0.00000 |
| HETATM | 265 | Pt | 12.49153 | 24.62893 | 24.08912 | Pt | 0 | 0 | 0.00000 |
| HETATM | 266 | Pt | 12.49234 | 7.88056  | 24.08995 | Pt | 0 | 0 | 0.00000 |
| HETATM | 267 | Pt | 12.49414 | 13.46412 | 24.07137 | Pt | 0 | 0 | 0.00000 |
| HETATM | 268 | Pt | 12.49235 | 19.04456 | 24.09563 | Pt | 0 | 0 | 0.00000 |
| HETATM | 269 | Pt | 17.32612 | 27.41887 | 24.09145 | Pt | 0 | 0 | 0.00000 |
| HETATM | 270 | Pt | 17.32553 | 10.67086 | 24.09201 | Pt | 0 | 0 | 0.00000 |
| HETATM | 271 | Pt | 17.32694 | 16.25516 | 24.09057 | Pt | 0 | 0 | 0.00000 |
| HETATM | 272 | Pt | 17.32746 | 21.83643 | 24.09030 | Pt | 0 | 0 | 0.00000 |
| HETATM | 273 | Pt | 2.82866  | 21.83646 | 24.07869 | Pt | 0 | 0 | 0.00000 |
| HETATM | 274 | Pt | 2.82896  | 5.09006  | 24.07781 | Pt | 0 | 0 | 0.00000 |
| HETATM | 275 | Pt | 2.82888  | 10.67245 | 24.07892 | Pt | 0 | 0 | 0.00000 |
| HETATM | 276 | Pt | 2.82900  | 16.25414 | 24.07921 | Pt | 0 | 0 | 0.00000 |

|        |     |    |          |          |          |    |   |   |         |
|--------|-----|----|----------|----------|----------|----|---|---|---------|
| HETATM | 277 | Pt | 7.66330  | 24.62861 | 24.07694 | Pt | 0 | 0 | 0.00000 |
| HETATM | 278 | Pt | 7.66307  | 7.88163  | 24.07706 | Pt | 0 | 0 | 0.00000 |
| HETATM | 279 | Pt | 7.66674  | 13.46450 | 24.08104 | Pt | 0 | 0 | 0.00000 |
| HETATM | 280 | Pt | 7.66385  | 19.04518 | 24.07899 | Pt | 0 | 0 | 0.00000 |
| HETATM | 281 | Pt | 12.49784 | 27.41984 | 24.07794 | Pt | 0 | 0 | 0.00000 |
| HETATM | 282 | Pt | 12.49405 | 10.66911 | 24.07225 | Pt | 0 | 0 | 0.00000 |
| HETATM | 283 | Pt | 12.49414 | 16.25691 | 24.08576 | Pt | 0 | 0 | 0.00000 |
| HETATM | 284 | Pt | 12.49868 | 21.83679 | 24.07515 | Pt | 0 | 0 | 0.00000 |
| HETATM | 285 | Pt | 17.33188 | 30.21013 | 24.07897 | Pt | 0 | 0 | 0.00000 |
| HETATM | 286 | Pt | 17.33076 | 13.46286 | 24.07993 | Pt | 0 | 0 | 0.00000 |
| HETATM | 287 | Pt | 17.33068 | 19.04442 | 24.08246 | Pt | 0 | 0 | 0.00000 |
| HETATM | 288 | Pt | 17.33255 | 24.62763 | 24.07824 | Pt | 0 | 0 | 0.00000 |
| HETATM | 289 | Pt | 5.23716  | 20.44601 | 24.07911 | Pt | 0 | 0 | 0.00000 |
| HETATM | 290 | Pt | 5.23703  | 3.69981  | 24.07710 | Pt | 0 | 0 | 0.00000 |
| HETATM | 291 | Pt | 5.23664  | 9.28256  | 24.07895 | Pt | 0 | 0 | 0.00000 |
| HETATM | 292 | Pt | 5.23742  | 14.86384 | 24.07939 | Pt | 0 | 0 | 0.00000 |
| HETATM | 293 | Pt | 10.07107 | 23.23898 | 24.07531 | Pt | 0 | 0 | 0.00000 |
| HETATM | 294 | Pt | 10.07114 | 6.49112  | 24.07656 | Pt | 0 | 0 | 0.00000 |
| HETATM | 295 | Pt | 10.07060 | 12.06796 | 24.07099 | Pt | 0 | 0 | 0.00000 |
| HETATM | 296 | Pt | 10.07418 | 17.65113 | 24.09046 | Pt | 0 | 0 | 0.00000 |
| HETATM | 297 | Pt | 14.90591 | 26.02889 | 24.07814 | Pt | 0 | 0 | 0.00000 |
| HETATM | 298 | Pt | 14.90527 | 9.28308  | 24.07958 | Pt | 0 | 0 | 0.00000 |
| HETATM | 299 | Pt | 14.90898 | 14.86256 | 24.07454 | Pt | 0 | 0 | 0.00000 |
| HETATM | 300 | Pt | 14.90745 | 20.44504 | 24.07917 | Pt | 0 | 0 | 0.00000 |
| HETATM | 301 | Pt | 0.40216  | 17.65494 | 24.07893 | Pt | 0 | 0 | 0.00000 |
| HETATM | 302 | Pt | 0.40220  | 0.90774  | 24.07763 | Pt | 0 | 0 | 0.00000 |
| HETATM | 303 | Pt | 0.40105  | 6.49068  | 24.08063 | Pt | 0 | 0 | 0.00000 |
| HETATM | 304 | Pt | 0.40290  | 12.07283 | 24.07844 | Pt | 0 | 0 | 0.00000 |
| HETATM | 305 | Pt | 5.23732  | 23.22703 | 24.07743 | Pt | 0 | 0 | 0.00000 |
| HETATM | 306 | Pt | 5.23664  | 6.48075  | 24.07816 | Pt | 0 | 0 | 0.00000 |
| HETATM | 307 | Pt | 5.23767  | 12.06330 | 24.07911 | Pt | 0 | 0 | 0.00000 |
| HETATM | 308 | Pt | 5.23722  | 17.64444 | 24.08020 | Pt | 0 | 0 | 0.00000 |
| HETATM | 309 | Pt | 10.07115 | 26.01959 | 24.07701 | Pt | 0 | 0 | 0.00000 |
| HETATM | 310 | Pt | 10.07224 | 9.27287  | 24.08032 | Pt | 0 | 0 | 0.00000 |
| HETATM | 311 | Pt | 10.07363 | 14.86179 | 24.08157 | Pt | 0 | 0 | 0.00000 |
| HETATM | 312 | Pt | 10.07200 | 20.43435 | 24.07800 | Pt | 0 | 0 | 0.00000 |
| HETATM | 313 | Pt | 14.90609 | 28.80993 | 24.07866 | Pt | 0 | 0 | 0.00000 |
| HETATM | 314 | Pt | 14.91010 | 12.06281 | 24.07315 | Pt | 0 | 0 | 0.00000 |
| HETATM | 315 | Pt | 14.90230 | 17.64368 | 24.08593 | Pt | 0 | 0 | 0.00000 |
| HETATM | 316 | Pt | 14.90662 | 23.22702 | 24.07633 | Pt | 0 | 0 | 0.00000 |
| HETATM | 317 | Pt | 0.40190  | 20.43553 | 24.07944 | Pt | 0 | 0 | 0.00000 |
| HETATM | 318 | Pt | 0.40351  | 3.68839  | 24.07579 | Pt | 0 | 0 | 0.00000 |
| HETATM | 319 | Pt | 0.40198  | 9.27091  | 24.07929 | Pt | 0 | 0 | 0.00000 |
| HETATM | 320 | Pt | 0.40240  | 14.85334 | 24.07865 | Pt | 0 | 0 | 0.00000 |
| HETATM | 321 | Pt | 3.62327  | 20.43239 | 26.38140 | Pt | 0 | 0 | 0.00000 |
| HETATM | 322 | Pt | 3.62456  | 3.68653  | 26.37990 | Pt | 0 | 0 | 0.00000 |
| HETATM | 323 | Pt | 3.62393  | 9.26923  | 26.38212 | Pt | 0 | 0 | 0.00000 |
| HETATM | 324 | Pt | 3.62508  | 14.85065 | 26.38222 | Pt | 0 | 0 | 0.00000 |
| HETATM | 325 | Pt | 8.45780  | 23.22639 | 26.37998 | Pt | 0 | 0 | 0.00000 |
| HETATM | 326 | Pt | 8.45755  | 6.47737  | 26.37839 | Pt | 0 | 0 | 0.00000 |
| HETATM | 327 | Pt | 8.46066  | 12.06270 | 26.38484 | Pt | 0 | 0 | 0.00000 |
| HETATM | 328 | Pt | 8.45804  | 17.64341 | 26.37861 | Pt | 0 | 0 | 0.00000 |
| HETATM | 329 | Pt | 13.29255 | 26.01767 | 26.38050 | Pt | 0 | 0 | 0.00000 |
| HETATM | 330 | Pt | 13.29414 | 9.27105  | 26.38179 | Pt | 0 | 0 | 0.00000 |
| HETATM | 331 | Pt | 13.29803 | 14.85486 | 26.36018 | Pt | 0 | 0 | 0.00000 |
| HETATM | 332 | Pt | 13.29424 | 20.43404 | 26.37683 | Pt | 0 | 0 | 0.00000 |
| HETATM | 333 | Pt | 18.12671 | 28.80682 | 26.38167 | Pt | 0 | 0 | 0.00000 |
| HETATM | 334 | Pt | 18.12596 | 12.05940 | 26.37790 | Pt | 0 | 0 | 0.00000 |
| HETATM | 335 | Pt | 18.12367 | 17.63996 | 26.38908 | Pt | 0 | 0 | 0.00000 |
| HETATM | 336 | Pt | 18.12776 | 23.22383 | 26.38084 | Pt | 0 | 0 | 0.00000 |
| HETATM | 337 | Pt | 3.62445  | 23.23995 | 26.38004 | Pt | 0 | 0 | 0.00000 |
| HETATM | 338 | Pt | 3.62363  | 6.49407  | 26.38140 | Pt | 0 | 0 | 0.00000 |
| HETATM | 339 | Pt | 3.62488  | 12.07546 | 26.38194 | Pt | 0 | 0 | 0.00000 |

|        |     |    |          |          |          |    |   |   |         |
|--------|-----|----|----------|----------|----------|----|---|---|---------|
| HETATM | 340 | Pt | 3.62471  | 17.65661 | 26.38290 | Pt | 0 | 0 | 0.00000 |
| HETATM | 341 | Pt | 8.45790  | 26.03277 | 26.37942 | Pt | 0 | 0 | 0.00000 |
| HETATM | 342 | Pt | 8.46002  | 9.28507  | 26.37653 | Pt | 0 | 0 | 0.00000 |
| HETATM | 343 | Pt | 8.46641  | 14.86297 | 26.38787 | Pt | 0 | 0 | 0.00000 |
| HETATM | 344 | Pt | 8.45847  | 20.45202 | 26.38047 | Pt | 0 | 0 | 0.00000 |
| HETATM | 345 | Pt | 13.29230 | 28.82509 | 26.38105 | Pt | 0 | 0 | 0.00000 |
| HETATM | 346 | Pt | 13.29205 | 12.06880 | 26.34369 | Pt | 0 | 0 | 0.00000 |
| HETATM | 347 | Pt | 13.28334 | 17.65374 | 26.40454 | Pt | 0 | 0 | 0.00000 |
| HETATM | 348 | Pt | 13.29219 | 23.24278 | 26.37529 | Pt | 0 | 0 | 0.00000 |
| HETATM | 349 | Pt | 18.12465 | 31.61472 | 26.38260 | Pt | 0 | 0 | 0.00000 |
| HETATM | 350 | Pt | 18.13076 | 14.86320 | 26.37366 | Pt | 0 | 0 | 0.00000 |
| HETATM | 351 | Pt | 18.12652 | 20.44734 | 26.38237 | Pt | 0 | 0 | 0.00000 |
| HETATM | 352 | Pt | 18.12713 | 26.03094 | 26.38143 | Pt | 0 | 0 | 0.00000 |
| HETATM | 353 | Pt | 6.05437  | 21.83726 | 26.38050 | Pt | 0 | 0 | 0.00000 |
| HETATM | 354 | Pt | 6.05441  | 5.09047  | 26.38001 | Pt | 0 | 0 | 0.00000 |
| HETATM | 355 | Pt | 6.05684  | 10.67321 | 26.38200 | Pt | 0 | 0 | 0.00000 |
| HETATM | 356 | Pt | 6.05804  | 16.25291 | 26.38301 | Pt | 0 | 0 | 0.00000 |
| HETATM | 357 | Pt | 10.88870 | 24.63054 | 26.37875 | Pt | 0 | 0 | 0.00000 |
| HETATM | 358 | Pt | 10.88862 | 7.88223  | 26.37604 | Pt | 0 | 0 | 0.00000 |
| HETATM | 359 | Pt | 10.88383 | 13.45292 | 26.33519 | Pt | 0 | 0 | 0.00000 |
| HETATM | 360 | Pt | 10.88813 | 19.04366 | 26.38437 | Pt | 0 | 0 | 0.00000 |
| HETATM | 361 | Pt | 15.72311 | 27.41962 | 26.38148 | Pt | 0 | 0 | 0.00000 |
| HETATM | 362 | Pt | 15.71803 | 10.67405 | 26.38725 | Pt | 0 | 0 | 0.00000 |
| HETATM | 363 | Pt | 15.72735 | 16.25139 | 26.37819 | Pt | 0 | 0 | 0.00000 |
| HETATM | 364 | Pt | 15.72517 | 21.83669 | 26.37655 | Pt | 0 | 0 | 0.00000 |
| HETATM | 365 | Pt | 1.21916  | 19.04509 | 26.38231 | Pt | 0 | 0 | 0.00000 |
| HETATM | 366 | Pt | 1.22294  | 2.29758  | 26.37774 | Pt | 0 | 0 | 0.00000 |
| HETATM | 367 | Pt | 1.21862  | 7.88025  | 26.38338 | Pt | 0 | 0 | 0.00000 |
| HETATM | 368 | Pt | 1.22066  | 13.46294 | 26.38132 | Pt | 0 | 0 | 0.00000 |
| HETATM | 369 | Pt | 6.04558  | 24.62891 | 26.30318 | Pt | 0 | 0 | 0.00000 |
| HETATM | 370 | Pt | 6.04604  | 7.88180  | 26.30488 | Pt | 0 | 0 | 0.00000 |
| HETATM | 371 | Pt | 6.04736  | 13.46351 | 26.30656 | Pt | 0 | 0 | 0.00000 |
| HETATM | 372 | Pt | 6.04647  | 19.04541 | 26.30727 | Pt | 0 | 0 | 0.00000 |
| HETATM | 373 | Pt | 10.87972 | 27.42098 | 26.30424 | Pt | 0 | 0 | 0.00000 |
| HETATM | 374 | Pt | 10.88510 | 10.67897 | 26.32104 | Pt | 0 | 0 | 0.00000 |
| HETATM | 375 | Pt | 10.89599 | 16.25281 | 26.35450 | Pt | 0 | 0 | 0.00000 |
| HETATM | 376 | Pt | 10.87902 | 21.84147 | 26.29742 | Pt | 0 | 0 | 0.00000 |
| HETATM | 377 | Pt | 15.71425 | 30.21084 | 26.30619 | Pt | 0 | 0 | 0.00000 |
| HETATM | 378 | Pt | 15.70550 | 13.46379 | 26.31763 | Pt | 0 | 0 | 0.00000 |
| HETATM | 379 | Pt | 15.71362 | 19.04212 | 26.31421 | Pt | 0 | 0 | 0.00000 |
| HETATM | 380 | Pt | 15.71441 | 24.62771 | 26.30445 | Pt | 0 | 0 | 0.00000 |
| HETATM | 381 | Pt | 1.21024  | 21.83665 | 26.30586 | Pt | 0 | 0 | 0.00000 |
| HETATM | 382 | Pt | 1.21195  | 5.08919  | 26.30375 | Pt | 0 | 0 | 0.00000 |
| HETATM | 383 | Pt | 1.21090  | 10.67162 | 26.30570 | Pt | 0 | 0 | 0.00000 |
| HETATM | 384 | Pt | 1.21109  | 16.25392 | 26.30554 | Pt | 0 | 0 | 0.00000 |
| HETATM | 385 | Pt | 2.02910  | 17.66996 | 28.75863 | Pt | 0 | 0 | 0.00000 |
| HETATM | 386 | Pt | 2.03104  | 23.25298 | 28.75853 | Pt | 0 | 0 | 0.00000 |
| HETATM | 387 | Pt | 2.02969  | 6.50721  | 28.76011 | Pt | 0 | 0 | 0.00000 |
| HETATM | 388 | Pt | 2.03048  | 12.08843 | 28.75813 | Pt | 0 | 0 | 0.00000 |
| HETATM | 389 | Pt | 6.86160  | 20.46622 | 28.75958 | Pt | 0 | 0 | 0.00000 |
| HETATM | 390 | Pt | 6.86374  | 26.04679 | 28.75689 | Pt | 0 | 0 | 0.00000 |
| HETATM | 391 | Pt | 6.87293  | 9.30223  | 28.75780 | Pt | 0 | 0 | 0.00000 |
| HETATM | 392 | Pt | 6.87918  | 14.87887 | 28.75675 | Pt | 0 | 0 | 0.00000 |
| HETATM | 393 | Pt | 11.69762 | 23.25056 | 28.75203 | Pt | 0 | 0 | 0.00000 |
| HETATM | 394 | Pt | 11.69746 | 28.84529 | 28.75799 | Pt | 0 | 0 | 0.00000 |
| HETATM | 395 | Pt | 11.69715 | 12.07867 | 28.65582 | Pt | 0 | 0 | 0.00000 |
| HETATM | 396 | Pt | 11.65677 | 17.66146 | 29.07898 | Pt | 0 | 0 | 0.00000 |
| HETATM | 397 | Pt | 16.53162 | 26.04731 | 28.75806 | Pt | 0 | 0 | 0.00000 |
| HETATM | 398 | Pt | 16.52590 | 31.63770 | 28.76090 | Pt | 0 | 0 | 0.00000 |
| HETATM | 399 | Pt | 16.53044 | 14.86247 | 28.72699 | Pt | 0 | 0 | 0.00000 |
| HETATM | 400 | Pt | 16.51999 | 20.45835 | 28.75483 | Pt | 0 | 0 | 0.00000 |
| HETATM | 401 | Pt | 2.02781  | 20.41769 | 28.75943 | Pt | 0 | 0 | 0.00000 |
| HETATM | 402 | Pt | 2.03069  | 3.67186  | 28.75780 | Pt | 0 | 0 | 0.00000 |

|        |     |    |          |          |          |    |   |   |         |
|--------|-----|----|----------|----------|----------|----|---|---|---------|
| HETATM | 403 | Pt | 2.02947  | 9.25460  | 28.75949 | Pt | 0 | 0 | 0.00000 |
| HETATM | 404 | Pt | 2.03144  | 14.83532 | 28.75859 | Pt | 0 | 0 | 0.00000 |
| HETATM | 405 | Pt | 6.86157  | 23.21312 | 28.75657 | Pt | 0 | 0 | 0.00000 |
| HETATM | 406 | Pt | 6.86346  | 6.46412  | 28.75829 | Pt | 0 | 0 | 0.00000 |
| HETATM | 407 | Pt | 6.87435  | 12.04155 | 28.76322 | Pt | 0 | 0 | 0.00000 |
| HETATM | 408 | Pt | 6.86390  | 17.62672 | 28.76270 | Pt | 0 | 0 | 0.00000 |
| HETATM | 409 | Pt | 11.69765 | 26.00175 | 28.75824 | Pt | 0 | 0 | 0.00000 |
| HETATM | 410 | Pt | 11.68620 | 9.26997  | 28.73382 | Pt | 0 | 0 | 0.00000 |
| HETATM | 411 | Pt | 11.68907 | 14.84349 | 28.71523 | Pt | 0 | 0 | 0.00000 |
| HETATM | 412 | Pt | 11.69065 | 20.42430 | 28.73041 | Pt | 0 | 0 | 0.00000 |
| HETATM | 413 | Pt | 16.53056 | 28.79603 | 28.75992 | Pt | 0 | 0 | 0.00000 |
| HETATM | 414 | Pt | 16.53584 | 12.05983 | 28.74478 | Pt | 0 | 0 | 0.00000 |
| HETATM | 415 | Pt | 16.54257 | 17.62297 | 28.80768 | Pt | 0 | 0 | 0.00000 |
| HETATM | 416 | Pt | 16.53301 | 23.20920 | 28.75760 | Pt | 0 | 0 | 0.00000 |
| HETATM | 417 | Pt | 4.40736  | 19.04509 | 28.75941 | Pt | 0 | 0 | 0.00000 |
| HETATM | 418 | Pt | 4.40905  | 24.62836 | 28.75682 | Pt | 0 | 0 | 0.00000 |
| HETATM | 419 | Pt | 4.40983  | 7.88238  | 28.75938 | Pt | 0 | 0 | 0.00000 |
| HETATM | 420 | Pt | 4.41282  | 13.46195 | 28.76032 | Pt | 0 | 0 | 0.00000 |
| HETATM | 421 | Pt | 9.24090  | 21.84292 | 28.76200 | Pt | 0 | 0 | 0.00000 |
| HETATM | 422 | Pt | 9.24309  | 27.41988 | 28.75804 | Pt | 0 | 0 | 0.00000 |
| HETATM | 423 | Pt | 9.26446  | 10.66961 | 28.73562 | Pt | 0 | 0 | 0.00000 |
| HETATM | 424 | Pt | 9.25339  | 16.27057 | 28.73269 | Pt | 0 | 0 | 0.00000 |
| HETATM | 425 | Pt | 14.07580 | 24.63111 | 28.75713 | Pt | 0 | 0 | 0.00000 |
| HETATM | 426 | Pt | 14.06917 | 30.21712 | 28.76134 | Pt | 0 | 0 | 0.00000 |
| HETATM | 427 | Pt | 14.09768 | 13.43256 | 28.68124 | Pt | 0 | 0 | 0.00000 |
| HETATM | 428 | Pt | 14.04924 | 19.04856 | 28.76615 | Pt | 0 | 0 | 0.00000 |
| HETATM | 429 | Pt | 18.91079 | 27.41940 | 28.75852 | Pt | 0 | 0 | 0.00000 |
| HETATM | 430 | Pt | 18.90830 | 33.00034 | 28.76077 | Pt | 0 | 0 | 0.00000 |
| HETATM | 431 | Pt | 18.91079 | 16.24683 | 28.75427 | Pt | 0 | 0 | 0.00000 |
| HETATM | 432 | Pt | 18.90661 | 21.83137 | 28.75863 | Pt | 0 | 0 | 0.00000 |
| HETATM | 433 | Pt | 4.43269  | 21.83617 | 28.58815 | Pt | 0 | 0 | 0.00000 |
| HETATM | 434 | Pt | 4.43406  | 5.09034  | 28.58821 | Pt | 0 | 0 | 0.00000 |
| HETATM | 435 | Pt | 4.43856  | 10.67204 | 28.59003 | Pt | 0 | 0 | 0.00000 |
| HETATM | 436 | Pt | 4.43889  | 16.25189 | 28.59124 | Pt | 0 | 0 | 0.00000 |
| HETATM | 437 | Pt | 9.26829  | 24.63008 | 28.58713 | Pt | 0 | 0 | 0.00000 |
| HETATM | 438 | Pt | 9.26673  | 7.87743  | 28.58401 | Pt | 0 | 0 | 0.00000 |
| HETATM | 439 | Pt | 9.28514  | 13.45175 | 28.61988 | Pt | 0 | 0 | 0.00000 |
| HETATM | 440 | Pt | 9.26244  | 19.05446 | 28.58970 | Pt | 0 | 0 | 0.00000 |
| HETATM | 441 | Pt | 14.10043 | 27.42348 | 28.58919 | Pt | 0 | 0 | 0.00000 |
| HETATM | 442 | Pt | 14.08578 | 10.68043 | 28.60946 | Pt | 0 | 0 | 0.00000 |
| HETATM | 443 | Pt | 14.07309 | 16.25067 | 28.67164 | Pt | 0 | 0 | 0.00000 |
| HETATM | 444 | Pt | 14.10549 | 21.84719 | 28.57816 | Pt | 0 | 0 | 0.00000 |
| HETATM | 445 | Pt | 18.93420 | 30.21181 | 28.59012 | Pt | 0 | 0 | 0.00000 |
| HETATM | 446 | Pt | 18.94573 |          |          |    |   |   |         |

ENERGY -58933.046434  
END

XTLGRF 200

DESCRP FS

REMARK Pt111\_0.25ML\_8x8x7\_30.0\_vac fcc-displacement

FIXATOMS 1 128

CRYSTX 22.32968 22.32968 43.67409 90.00000 90.00000 60.00000

FORMAT ATOM (a6,1x,i5,1x,a5,1x,a3,1x,a1,1x,a5,3f10.5,1x,a5,i3,i2,1x,f8.5)

|        |    |    |          |          |          |    |   |   |         |
|--------|----|----|----------|----------|----------|----|---|---|---------|
| HETATM | 1  | Pt | 2.01698  | 17.64996 | 14.96615 | Pt | 0 | 0 | 0.00000 |
| HETATM | 2  | Pt | 2.01698  | 23.23238 | 14.96615 | Pt | 0 | 0 | 0.00000 |
| HETATM | 3  | Pt | 2.01698  | 6.48512  | 14.96615 | Pt | 0 | 0 | 0.00000 |
| HETATM | 4  | Pt | 2.01698  | 12.06754 | 14.96615 | Pt | 0 | 0 | 0.00000 |
| HETATM | 5  | Pt | 6.85150  | 20.44117 | 14.96615 | Pt | 0 | 0 | 0.00000 |
| HETATM | 6  | Pt | 6.85150  | 26.02359 | 14.96615 | Pt | 0 | 0 | 0.00000 |
| HETATM | 7  | Pt | 6.85150  | 9.27633  | 14.96615 | Pt | 0 | 0 | 0.00000 |
| HETATM | 8  | Pt | 6.85150  | 14.85875 | 14.96615 | Pt | 0 | 0 | 0.00000 |
| HETATM | 9  | Pt | 11.68602 | 23.23238 | 14.96615 | Pt | 0 | 0 | 0.00000 |
| HETATM | 10 | Pt | 11.68602 | 28.81480 | 14.96615 | Pt | 0 | 0 | 0.00000 |
| HETATM | 11 | Pt | 11.68602 | 12.06754 | 14.96615 | Pt | 0 | 0 | 0.00000 |
| HETATM | 12 | Pt | 11.68602 | 17.64996 | 14.96615 | Pt | 0 | 0 | 0.00000 |
| HETATM | 13 | Pt | 16.52053 | 26.02359 | 14.96615 | Pt | 0 | 0 | 0.00000 |
| HETATM | 14 | Pt | 16.52053 | 31.60601 | 14.96615 | Pt | 0 | 0 | 0.00000 |
| HETATM | 15 | Pt | 16.52053 | 14.85875 | 14.96615 | Pt | 0 | 0 | 0.00000 |
| HETATM | 16 | Pt | 16.52053 | 20.44117 | 14.96615 | Pt | 0 | 0 | 0.00000 |
| HETATM | 17 | Pt | 2.01698  | 20.44117 | 14.96615 | Pt | 0 | 0 | 0.00000 |
| HETATM | 18 | Pt | 2.01698  | 3.69391  | 14.96615 | Pt | 0 | 0 | 0.00000 |
| HETATM | 19 | Pt | 2.01698  | 9.27633  | 14.96615 | Pt | 0 | 0 | 0.00000 |
| HETATM | 20 | Pt | 2.01698  | 14.85875 | 14.96615 | Pt | 0 | 0 | 0.00000 |
| HETATM | 21 | Pt | 6.85150  | 23.23238 | 14.96615 | Pt | 0 | 0 | 0.00000 |
| HETATM | 22 | Pt | 6.85150  | 6.48512  | 14.96615 | Pt | 0 | 0 | 0.00000 |
| HETATM | 23 | Pt | 6.85150  | 12.06754 | 14.96615 | Pt | 0 | 0 | 0.00000 |
| HETATM | 24 | Pt | 6.85150  | 17.64996 | 14.96615 | Pt | 0 | 0 | 0.00000 |
| HETATM | 25 | Pt | 11.68602 | 26.02359 | 14.96615 | Pt | 0 | 0 | 0.00000 |
| HETATM | 26 | Pt | 11.68602 | 9.27633  | 14.96615 | Pt | 0 | 0 | 0.00000 |
| HETATM | 27 | Pt | 11.68602 | 14.85875 | 14.96615 | Pt | 0 | 0 | 0.00000 |
| HETATM | 28 | Pt | 11.68602 | 20.44117 | 14.96615 | Pt | 0 | 0 | 0.00000 |
| HETATM | 29 | Pt | 16.52053 | 28.81480 | 14.96615 | Pt | 0 | 0 | 0.00000 |
| HETATM | 30 | Pt | 16.52053 | 12.06754 | 14.96615 | Pt | 0 | 0 | 0.00000 |
| HETATM | 31 | Pt | 16.52053 | 17.64996 | 14.96615 | Pt | 0 | 0 | 0.00000 |
| HETATM | 32 | Pt | 16.52053 | 23.23238 | 14.96615 | Pt | 0 | 0 | 0.00000 |
| HETATM | 33 | Pt | 4.43424  | 19.04557 | 14.96615 | Pt | 0 | 0 | 0.00000 |
| HETATM | 34 | Pt | 4.43424  | 24.62799 | 14.96615 | Pt | 0 | 0 | 0.00000 |
| HETATM | 35 | Pt | 4.43424  | 7.88073  | 14.96615 | Pt | 0 | 0 | 0.00000 |
| HETATM | 36 | Pt | 4.43424  | 13.46315 | 14.96615 | Pt | 0 | 0 | 0.00000 |
| HETATM | 37 | Pt | 9.26876  | 21.83678 | 14.96615 | Pt | 0 | 0 | 0.00000 |
| HETATM | 38 | Pt | 9.26876  | 27.41920 | 14.96615 | Pt | 0 | 0 | 0.00000 |
| HETATM | 39 | Pt | 9.26876  | 10.67194 | 14.96615 | Pt | 0 | 0 | 0.00000 |
| HETATM | 40 | Pt | 9.26876  | 16.25436 | 14.96615 | Pt | 0 | 0 | 0.00000 |
| HETATM | 41 | Pt | 14.10328 | 24.62799 | 14.96615 | Pt | 0 | 0 | 0.00000 |
| HETATM | 42 | Pt | 14.10328 | 30.21041 | 14.96615 | Pt | 0 | 0 | 0.00000 |
| HETATM | 43 | Pt | 14.10328 | 13.46315 | 14.96615 | Pt | 0 | 0 | 0.00000 |
| HETATM | 44 | Pt | 14.10328 | 19.04557 | 14.96615 | Pt | 0 | 0 | 0.00000 |
| HETATM | 45 | Pt | 18.93779 | 27.41920 | 14.96615 | Pt | 0 | 0 | 0.00000 |
| HETATM | 46 | Pt | 18.93779 | 33.00162 | 14.96615 | Pt | 0 | 0 | 0.00000 |
| HETATM | 47 | Pt | 18.93779 | 16.25436 | 14.96615 | Pt | 0 | 0 | 0.00000 |
| HETATM | 48 | Pt | 18.93779 | 21.83678 | 14.96615 | Pt | 0 | 0 | 0.00000 |
| HETATM | 49 | Pt | 4.43424  | 21.83678 | 14.96615 | Pt | 0 | 0 | 0.00000 |
| HETATM | 50 | Pt | 4.43424  | 5.08952  | 14.96615 | Pt | 0 | 0 | 0.00000 |
| HETATM | 51 | Pt | 4.43424  | 10.67194 | 14.96615 | Pt | 0 | 0 | 0.00000 |
| HETATM | 52 | Pt | 4.43424  | 16.25436 | 14.96615 | Pt | 0 | 0 | 0.00000 |
| HETATM | 53 | Pt | 9.26876  | 24.62799 | 14.96615 | Pt | 0 | 0 | 0.00000 |
| HETATM | 54 | Pt | 9.26876  | 7.88073  | 14.96615 | Pt | 0 | 0 | 0.00000 |



|        |     |    |          |          |          |    |   |   |         |
|--------|-----|----|----------|----------|----------|----|---|---|---------|
| HETATM | 55  | Pt | 9.26876  | 13.46315 | 14.96615 | Pt | 0 | 0 | 0.00000 |
| HETATM | 56  | Pt | 9.26876  | 19.04557 | 14.96615 | Pt | 0 | 0 | 0.00000 |
| HETATM | 57  | Pt | 14.10328 | 27.41920 | 14.96615 | Pt | 0 | 0 | 0.00000 |
| HETATM | 58  | Pt | 14.10328 | 10.67194 | 14.96615 | Pt | 0 | 0 | 0.00000 |
| HETATM | 59  | Pt | 14.10328 | 16.25436 | 14.96615 | Pt | 0 | 0 | 0.00000 |
| HETATM | 60  | Pt | 14.10328 | 21.83678 | 14.96615 | Pt | 0 | 0 | 0.00000 |
| HETATM | 61  | Pt | 18.93779 | 30.21041 | 14.96615 | Pt | 0 | 0 | 0.00000 |
| HETATM | 62  | Pt | 18.93779 | 13.46315 | 14.96615 | Pt | 0 | 0 | 0.00000 |
| HETATM | 63  | Pt | 18.93779 | 19.04557 | 14.96615 | Pt | 0 | 0 | 0.00000 |
| HETATM | 64  | Pt | 18.93779 | 24.62799 | 14.96615 | Pt | 0 | 0 | 0.00000 |
| HETATM | 65  | Pt | 2.82273  | 19.04557 | 17.24517 | Pt | 0 | 0 | 0.00000 |
| HETATM | 66  | Pt | 2.82273  | 2.29831  | 17.24517 | Pt | 0 | 0 | 0.00000 |
| HETATM | 67  | Pt | 2.82273  | 7.88073  | 17.24517 | Pt | 0 | 0 | 0.00000 |
| HETATM | 68  | Pt | 2.82273  | 13.46315 | 17.24517 | Pt | 0 | 0 | 0.00000 |
| HETATM | 69  | Pt | 7.65725  | 21.83678 | 17.24517 | Pt | 0 | 0 | 0.00000 |
| HETATM | 70  | Pt | 7.65725  | 5.08952  | 17.24517 | Pt | 0 | 0 | 0.00000 |
| HETATM | 71  | Pt | 7.65725  | 10.67194 | 17.24517 | Pt | 0 | 0 | 0.00000 |
| HETATM | 72  | Pt | 7.65725  | 16.25436 | 17.24517 | Pt | 0 | 0 | 0.00000 |
| HETATM | 73  | Pt | 12.49177 | 24.62799 | 17.24517 | Pt | 0 | 0 | 0.00000 |
| HETATM | 74  | Pt | 12.49177 | 7.88073  | 17.24517 | Pt | 0 | 0 | 0.00000 |
| HETATM | 75  | Pt | 12.49177 | 13.46315 | 17.24517 | Pt | 0 | 0 | 0.00000 |
| HETATM | 76  | Pt | 12.49177 | 19.04557 | 17.24517 | Pt | 0 | 0 | 0.00000 |
| HETATM | 77  | Pt | 17.32628 | 27.41920 | 17.24517 | Pt | 0 | 0 | 0.00000 |
| HETATM | 78  | Pt | 17.32628 | 10.67194 | 17.24517 | Pt | 0 | 0 | 0.00000 |
| HETATM | 79  | Pt | 17.32628 | 16.25436 | 17.24517 | Pt | 0 | 0 | 0.00000 |
| HETATM | 80  | Pt | 17.32628 | 21.83678 | 17.24517 | Pt | 0 | 0 | 0.00000 |
| HETATM | 81  | Pt | 2.82273  | 21.83678 | 17.24517 | Pt | 0 | 0 | 0.00000 |
| HETATM | 82  | Pt | 2.82273  | 5.08952  | 17.24517 | Pt | 0 | 0 | 0.00000 |
| HETATM | 83  | Pt | 2.82273  | 10.67194 | 17.24517 | Pt | 0 | 0 | 0.00000 |
| HETATM | 84  | Pt | 2.82273  | 16.25436 | 17.24517 | Pt | 0 | 0 | 0.00000 |
| HETATM | 85  | Pt | 7.65725  | 24.62799 | 17.24517 | Pt | 0 | 0 | 0.00000 |
| HETATM | 86  | Pt | 7.65725  | 7.88073  | 17.24517 | Pt | 0 | 0 | 0.00000 |
| HETATM | 87  | Pt | 7.65725  | 13.46315 | 17.24517 | Pt | 0 | 0 | 0.00000 |
| HETATM | 88  | Pt | 7.65725  | 19.04557 | 17.24517 | Pt | 0 | 0 | 0.00000 |
| HETATM | 89  | Pt | 12.49177 | 27.41920 | 17.24517 | Pt | 0 | 0 | 0.00000 |
| HETATM | 90  | Pt | 12.49177 | 10.67194 | 17.24517 | Pt | 0 | 0 | 0.00000 |
| HETATM | 91  | Pt | 12.49177 | 16.25436 | 17.24517 | Pt | 0 | 0 | 0.00000 |
| HETATM | 92  | Pt | 12.49177 | 21.83678 | 17.24517 | Pt | 0 | 0 | 0.00000 |
| HETATM | 93  | Pt | 17.32628 | 30.21041 | 17.24517 | Pt | 0 | 0 | 0.00000 |
| HETATM | 94  | Pt | 17.32628 | 13.46315 | 17.24517 | Pt | 0 | 0 | 0.00000 |
| HETATM | 95  | Pt | 17.32628 | 19.04557 | 17.24517 | Pt | 0 | 0 | 0.00000 |
| HETATM | 96  | Pt | 17.32628 | 24.62799 | 17.24517 | Pt | 0 | 0 | 0.00000 |
| HETATM | 97  | Pt | 5.23999  | 20.44117 | 17.24517 | Pt | 0 | 0 | 0.00000 |
| HETATM | 98  | Pt | 5.23999  | 3.69391  | 17.24517 | Pt | 0 | 0 | 0.00000 |
| HETATM | 99  | Pt | 5.23999  | 9.27633  | 17.24517 | Pt | 0 | 0 | 0.00000 |
| HETATM | 100 | Pt | 5.23999  | 14.85875 | 17.24517 | Pt | 0 | 0 | 0.00000 |
| HETATM | 101 | Pt | 10.07451 | 23.23238 | 17.24517 | Pt | 0 | 0 | 0.00000 |
| HETATM | 102 | Pt | 10.07451 | 6.48512  | 17.24517 | Pt | 0 | 0 | 0.00000 |
| HETATM | 103 | Pt | 10.07451 | 12.06754 | 17.24517 | Pt | 0 | 0 | 0.00000 |
| HETATM | 104 | Pt | 10.07451 | 17.64996 | 17.24517 | Pt | 0 | 0 | 0.00000 |
| HETATM | 105 | Pt | 14.90903 | 26.02359 | 17.24517 | Pt | 0 | 0 | 0.00000 |
| HETATM | 106 | Pt | 14.90903 | 9.27633  | 17.24517 | Pt | 0 | 0 | 0.00000 |
| HETATM | 107 | Pt | 14.90903 | 14.85875 | 17.24517 | Pt | 0 | 0 | 0.00000 |
| HETATM | 108 | Pt | 14.90903 | 20.44117 | 17.24517 | Pt | 0 | 0 | 0.00000 |
| HETATM | 109 | Pt | 0.40547  | 17.64996 | 17.24517 | Pt | 0 | 0 | 0.00000 |
| HETATM | 110 | Pt | 0.40547  | 0.90270  | 17.24517 | Pt | 0 | 0 | 0.00000 |
| HETATM | 111 | Pt | 0.40547  | 6.48512  | 17.24517 | Pt | 0 | 0 | 0.00000 |
| HETATM | 112 | Pt | 0.40547  | 12.06754 | 17.24517 | Pt | 0 | 0 | 0.00000 |
| HETATM | 113 | Pt | 5.23999  | 23.23238 | 17.24517 | Pt | 0 | 0 | 0.00000 |
| HETATM | 114 | Pt | 5.23999  | 6.48512  | 17.24517 | Pt | 0 | 0 | 0.00000 |
| HETATM | 115 | Pt | 5.23999  | 12.06754 | 17.24517 | Pt | 0 | 0 | 0.00000 |
| HETATM | 116 | Pt | 5.23999  | 17.64996 | 17.24517 | Pt | 0 | 0 | 0.00000 |
| HETATM | 117 | Pt | 10.07451 | 26.02359 | 17.24517 | Pt | 0 | 0 | 0.00000 |

|        |     |    |          |          |          |    |   |   |         |
|--------|-----|----|----------|----------|----------|----|---|---|---------|
| HETATM | 118 | Pt | 10.07451 | 9.27633  | 17.24517 | Pt | 0 | 0 | 0.00000 |
| HETATM | 119 | Pt | 10.07451 | 14.85875 | 17.24517 | Pt | 0 | 0 | 0.00000 |
| HETATM | 120 | Pt | 10.07451 | 20.44117 | 17.24517 | Pt | 0 | 0 | 0.00000 |
| HETATM | 121 | Pt | 14.90903 | 28.81480 | 17.24517 | Pt | 0 | 0 | 0.00000 |
| HETATM | 122 | Pt | 14.90903 | 12.06754 | 17.24517 | Pt | 0 | 0 | 0.00000 |
| HETATM | 123 | Pt | 14.90903 | 17.64996 | 17.24517 | Pt | 0 | 0 | 0.00000 |
| HETATM | 124 | Pt | 14.90903 | 23.23238 | 17.24517 | Pt | 0 | 0 | 0.00000 |
| HETATM | 125 | Pt | 0.40547  | 20.44117 | 17.24517 | Pt | 0 | 0 | 0.00000 |
| HETATM | 126 | Pt | 0.40547  | 3.69391  | 17.24517 | Pt | 0 | 0 | 0.00000 |
| HETATM | 127 | Pt | 0.40547  | 9.27633  | 17.24517 | Pt | 0 | 0 | 0.00000 |
| HETATM | 128 | Pt | 0.40547  | 14.85875 | 17.24517 | Pt | 0 | 0 | 0.00000 |
| HETATM | 129 | Pt | 3.62846  | 20.44070 | 19.52392 | Pt | 0 | 0 | 0.00000 |
| HETATM | 130 | Pt | 3.62846  | 3.69362  | 19.52381 | Pt | 0 | 0 | 0.00000 |
| HETATM | 131 | Pt | 3.62857  | 9.27619  | 19.52383 | Pt | 0 | 0 | 0.00000 |
| HETATM | 132 | Pt | 3.62852  | 14.85865 | 19.52378 | Pt | 0 | 0 | 0.00000 |
| HETATM | 133 | Pt | 8.46313  | 23.23117 | 19.52388 | Pt | 0 | 0 | 0.00000 |
| HETATM | 134 | Pt | 8.46225  | 6.48476  | 19.52349 | Pt | 0 | 0 | 0.00000 |
| HETATM | 135 | Pt | 8.46339  | 12.06835 | 19.52371 | Pt | 0 | 0 | 0.00000 |
| HETATM | 136 | Pt | 8.46269  | 17.64989 | 19.52481 | Pt | 0 | 0 | 0.00000 |
| HETATM | 137 | Pt | 13.29706 | 26.02353 | 19.52291 | Pt | 0 | 0 | 0.00000 |
| HETATM | 138 | Pt | 13.29703 | 9.27575  | 19.52260 | Pt | 0 | 0 | 0.00000 |
| HETATM | 139 | Pt | 13.29724 | 14.85933 | 19.52325 | Pt | 0 | 0 | 0.00000 |
| HETATM | 140 | Pt | 13.29734 | 20.44028 | 19.52340 | Pt | 0 | 0 | 0.00000 |
| HETATM | 141 | Pt | 18.13190 | 28.81451 | 19.52363 | Pt | 0 | 0 | 0.00000 |
| HETATM | 142 | Pt | 18.13294 | 12.06732 | 19.52279 | Pt | 0 | 0 | 0.00000 |
| HETATM | 143 | Pt | 18.13112 | 17.64974 | 19.52454 | Pt | 0 | 0 | 0.00000 |
| HETATM | 144 | Pt | 18.13248 | 23.23212 | 19.52291 | Pt | 0 | 0 | 0.00000 |
| HETATM | 145 | Pt | 3.62874  | 23.23261 | 19.52370 | Pt | 0 | 0 | 0.00000 |
| HETATM | 146 | Pt | 3.62813  | 6.48565  | 19.52407 | Pt | 0 | 0 | 0.00000 |
| HETATM | 147 | Pt | 3.62882  | 12.06825 | 19.52364 | Pt | 0 | 0 | 0.00000 |
| HETATM | 148 | Pt | 3.62835  | 17.65043 | 19.52401 | Pt | 0 | 0 | 0.00000 |
| HETATM | 149 | Pt | 8.46254  | 26.02371 | 19.52333 | Pt | 0 | 0 | 0.00000 |
| HETATM | 150 | Pt | 8.46240  | 9.27668  | 19.52291 | Pt | 0 | 0 | 0.00000 |
| HETATM | 151 | Pt | 8.46315  | 14.86037 | 19.52440 | Pt | 0 | 0 | 0.00000 |
| HETATM | 152 | Pt | 8.46330  | 20.44045 | 19.52495 | Pt | 0 | 0 | 0.00000 |
| HETATM | 153 | Pt | 13.29718 | 28.81522 | 19.52310 | Pt | 0 | 0 | 0.00000 |
| HETATM | 154 | Pt | 13.29786 | 12.06791 | 19.52062 | Pt | 0 | 0 | 0.00000 |
| HETATM | 155 | Pt | 13.29629 | 17.65018 | 19.52600 | Pt | 0 | 0 | 0.00000 |
| HETATM | 156 | Pt | 13.29743 | 23.23285 | 19.52214 | Pt | 0 | 0 | 0.00000 |
| HETATM | 157 | Pt | 18.13207 | 31.60631 | 19.52338 | Pt | 0 | 0 | 0.00000 |
| HETATM | 158 | Pt | 18.13226 | 14.85954 | 19.52332 | Pt | 0 | 0 | 0.00000 |
| HETATM | 159 | Pt | 18.13227 | 20.44135 | 19.52306 | Pt | 0 | 0 | 0.00000 |
| HETATM | 160 | Pt | 18.13195 | 26.02417 | 19.52360 | Pt | 0 | 0 | 0.00000 |
| HETATM | 161 | Pt | 6.04661  | 21.83646 | 19.52385 | Pt | 0 | 0 | 0.00000 |
| HETATM | 162 | Pt | 6.04594  | 5.08944  | 19.52365 | Pt | 0 | 0 | 0.00000 |
| HETATM | 163 | Pt | 6.04669  | 10.67252 | 19.52376 | Pt | 0 | 0 | 0.00000 |
| HETATM | 164 | Pt | 6.04614  | 16.25460 | 19.52382 | Pt | 0 | 0 | 0.00000 |
| HETATM | 165 | Pt | 10.88047 | 24.62795 | 19.52257 | Pt | 0 | 0 | 0.00000 |
| HETATM | 166 | Pt | 10.88000 | 7.88038  | 19.52273 | Pt | 0 | 0 | 0.00000 |
| HETATM | 167 | Pt | 10.88087 | 13.46454 | 19.52266 | Pt | 0 | 0 | 0.00000 |
| HETATM | 168 | Pt | 10.88059 | 19.04486 | 19.52587 | Pt | 0 | 0 | 0.00000 |
| HETATM | 169 | Pt | 15.71519 | 27.41933 | 19.52347 | Pt | 0 | 0 | 0.00000 |
| HETATM | 170 | Pt | 15.71573 | 10.67194 | 19.52264 | Pt | 0 | 0 | 0.00000 |
| HETATM | 171 | Pt | 15.71430 | 16.25466 | 19.52503 | Pt | 0 | 0 | 0.00000 |
| HETATM | 172 | Pt | 15.71583 | 21.83671 | 19.52230 | Pt | 0 | 0 | 0.00000 |
| HETATM | 173 | Pt | 1.21181  | 19.04561 | 19.52371 | Pt | 0 | 0 | 0.00000 |
| HETATM | 174 | Pt | 1.21223  | 2.29851  | 19.52362 | Pt | 0 | 0 | 0.00000 |
| HETATM | 175 | Pt | 1.21161  | 7.88073  | 19.52404 | Pt | 0 | 0 | 0.00000 |
| HETATM | 176 | Pt | 1.21205  | 13.46342 | 19.52358 | Pt | 0 | 0 | 0.00000 |
| HETATM | 177 | Pt | 6.04602  | 24.62765 | 19.52540 | Pt | 0 | 0 | 0.00000 |
| HETATM | 178 | Pt | 6.04545  | 7.88090  | 19.52524 | Pt | 0 | 0 | 0.00000 |
| HETATM | 179 | Pt | 6.04623  | 13.46358 | 19.52522 | Pt | 0 | 0 | 0.00000 |
| HETATM | 180 | Pt | 6.04561  | 19.04564 | 19.52548 | Pt | 0 | 0 | 0.00000 |

|        |     |    |          |          |          |    |   |   |         |
|--------|-----|----|----------|----------|----------|----|---|---|---------|
| HETATM | 181 | Pt | 10.87976 | 27.41917 | 19.52447 | Pt | 0 | 0 | 0.00000 |
| HETATM | 182 | Pt | 10.87992 | 10.67173 | 19.52278 | Pt | 0 | 0 | 0.00000 |
| HETATM | 183 | Pt | 10.87992 | 16.25552 | 19.52679 | Pt | 0 | 0 | 0.00000 |
| HETATM | 184 | Pt | 10.88047 | 21.83599 | 19.52506 | Pt | 0 | 0 | 0.00000 |
| HETATM | 185 | Pt | 15.71487 | 30.21034 | 19.52480 | Pt | 0 | 0 | 0.00000 |
| HETATM | 186 | Pt | 15.71606 | 13.46348 | 19.52294 | Pt | 0 | 0 | 0.00000 |
| HETATM | 187 | Pt | 15.71429 | 19.04528 | 19.52547 | Pt | 0 | 0 | 0.00000 |
| HETATM | 188 | Pt | 15.71497 | 24.62823 | 19.52444 | Pt | 0 | 0 | 0.00000 |
| HETATM | 189 | Pt | 1.21173  | 21.83663 | 19.52509 | Pt | 0 | 0 | 0.00000 |
| HETATM | 190 | Pt | 1.21128  | 5.08986  | 19.52541 | Pt | 0 | 0 | 0.00000 |
| HETATM | 191 | Pt | 1.21194  | 10.67205 | 19.52487 | Pt | 0 | 0 | 0.00000 |
| HETATM | 192 | Pt | 1.21135  | 16.25457 | 19.52527 | Pt | 0 | 0 | 0.00000 |
| HETATM | 193 | Pt | 2.01749  | 17.65080 | 21.80447 | Pt | 0 | 0 | 0.00000 |
| HETATM | 194 | Pt | 2.01816  | 23.23308 | 21.80370 | Pt | 0 | 0 | 0.00000 |
| HETATM | 195 | Pt | 2.01708  | 6.48632  | 21.80513 | Pt | 0 | 0 | 0.00000 |
| HETATM | 196 | Pt | 2.01842  | 12.06885 | 21.80381 | Pt | 0 | 0 | 0.00000 |
| HETATM | 197 | Pt | 6.85255  | 20.44156 | 21.80489 | Pt | 0 | 0 | 0.00000 |
| HETATM | 198 | Pt | 6.85153  | 26.02406 | 21.80395 | Pt | 0 | 0 | 0.00000 |
| HETATM | 199 | Pt | 6.85133  | 9.27760  | 21.80376 | Pt | 0 | 0 | 0.00000 |
| HETATM | 200 | Pt | 6.85241  | 14.86006 | 21.80418 | Pt | 0 | 0 | 0.00000 |
| HETATM | 201 | Pt | 11.68653 | 23.23357 | 21.80094 | Pt | 0 | 0 | 0.00000 |
| HETATM | 202 | Pt | 11.68561 | 28.81522 | 21.80248 | Pt | 0 | 0 | 0.00000 |
| HETATM | 203 | Pt | 11.68661 | 12.06761 | 21.79643 | Pt | 0 | 0 | 0.00000 |
| HETATM | 204 | Pt | 11.68583 | 17.65047 | 21.81216 | Pt | 0 | 0 | 0.00000 |
| HETATM | 205 | Pt | 16.52101 | 26.02449 | 21.80356 | Pt | 0 | 0 | 0.00000 |
| HETATM | 206 | Pt | 16.52096 | 31.60676 | 21.80302 | Pt | 0 | 0 | 0.00000 |
| HETATM | 207 | Pt | 16.52193 | 14.85961 | 21.80321 | Pt | 0 | 0 | 0.00000 |
| HETATM | 208 | Pt | 16.52213 | 20.44191 | 21.80219 | Pt | 0 | 0 | 0.00000 |
| HETATM | 209 | Pt | 2.01778  | 20.44023 | 21.80441 | Pt | 0 | 0 | 0.00000 |
| HETATM | 210 | Pt | 2.01764  | 3.69325  | 21.80425 | Pt | 0 | 0 | 0.00000 |
| HETATM | 211 | Pt | 2.01792  | 9.27594  | 21.80415 | Pt | 0 | 0 | 0.00000 |
| HETATM | 212 | Pt | 2.01780  | 14.85826 | 21.80428 | Pt | 0 | 0 | 0.00000 |
| HETATM | 213 | Pt | 6.85272  | 23.23078 | 21.80459 | Pt | 0 | 0 | 0.00000 |
| HETATM | 214 | Pt | 6.85123  | 6.48446  | 21.80392 | Pt | 0 | 0 | 0.00000 |
| HETATM | 215 | Pt | 6.85339  | 12.06819 | 21.80428 | Pt | 0 | 0 | 0.00000 |
| HETATM | 216 | Pt | 6.85120  | 17.64966 | 21.80459 | Pt | 0 | 0 | 0.00000 |
| HETATM | 217 | Pt | 11.68562 | 26.02329 | 21.80235 | Pt | 0 | 0 | 0.00000 |
| HETATM | 218 | Pt | 11.68492 | 9.27451  | 21.80132 | Pt | 0 | 0 | 0.00000 |
| HETATM | 219 | Pt | 11.68658 | 14.86155 | 21.80419 | Pt | 0 | 0 | 0.00000 |
| HETATM | 220 | Pt | 11.68718 | 20.43896 | 21.80520 | Pt | 0 | 0 | 0.00000 |
| HETATM | 221 | Pt | 16.52087 | 28.81400 | 21.80377 | Pt | 0 | 0 | 0.00000 |
| HETATM | 222 | Pt | 16.52335 | 12.06684 | 21.80116 | Pt | 0 | 0 | 0.00000 |
| HETATM | 223 | Pt | 16.51852 | 17.64922 | 21.80664 | Pt | 0 | 0 | 0.00000 |
| HETATM | 224 | Pt | 16.52205 | 23.23184 | 21.80174 | Pt | 0 | 0 | 0.00000 |
| HETATM | 225 | Pt | 4.43328  | 19.04564 | 21.80486 | Pt | 0 | 0 | 0.00000 |
| HETATM | 226 | Pt | 4.43380  | 24.62775 | 21.80415 | Pt | 0 | 0 | 0.00000 |
| HETATM | 227 | Pt | 4.43307  | 7.88111  | 21.80460 | Pt | 0 | 0 | 0.00000 |
| HETATM | 228 | Pt | 4.43398  | 13.46370 | 21.80406 | Pt | 0 | 0 | 0.00000 |
| HETATM | 229 | Pt | 9.26884  | 21.83480 | 21.80516 | Pt | 0 | 0 | 0.00000 |
| HETATM | 230 | Pt | 9.26678  | 27.41932 | 21.80315 | Pt | 0 | 0 | 0.00000 |
| HETATM | 231 | Pt | 9.26717  | 10.67098 | 21.80124 | Pt | 0 | 0 | 0.00000 |
| HETATM | 232 | Pt | 9.26804  | 16.25670 | 21.80807 | Pt | 0 | 0 | 0.00000 |
| HETATM | 233 | Pt | 14.10234 | 24.62855 | 21.80166 | Pt | 0 | 0 | 0.00000 |
| HETATM | 234 | Pt | 14.10199 | 30.21040 | 21.80276 | Pt | 0 | 0 | 0.00000 |
| HETATM | 235 | Pt | 14.10521 | 13.46324 | 21.79688 | Pt | 0 | 0 | 0.00000 |
| HETATM | 236 | Pt | 14.10171 | 19.04500 | 21.80612 | Pt | 0 | 0 | 0.00000 |
| HETATM | 237 | Pt | 18.93696 | 27.41935 | 21.80404 | Pt | 0 | 0 | 0.00000 |
| HETATM | 238 | Pt | 18.93782 | 33.00134 | 21.80327 | Pt | 0 | 0 | 0.00000 |
| HETATM | 239 | Pt | 18.93695 | 16.25504 | 21.80431 | Pt | 0 | 0 | 0.00000 |
| HETATM | 240 | Pt | 18.93829 | 21.83693 | 21.80262 | Pt | 0 | 0 | 0.00000 |
| HETATM | 241 | Pt | 4.43480  | 21.83647 | 21.79822 | Pt | 0 | 0 | 0.00000 |
| HETATM | 242 | Pt | 4.43387  | 5.08967  | 21.79843 | Pt | 0 | 0 | 0.00000 |
| HETATM | 243 | Pt | 4.43497  | 10.67272 | 21.79805 | Pt | 0 | 0 | 0.00000 |

|        |     |    |          |          |          |    |   |   |         |
|--------|-----|----|----------|----------|----------|----|---|---|---------|
| HETATM | 244 | Pt | 4.43440  | 16.25466 | 21.79859 | Pt | 0 | 0 | 0.00000 |
| HETATM | 245 | Pt | 9.26845  | 24.62794 | 21.79686 | Pt | 0 | 0 | 0.00000 |
| HETATM | 246 | Pt | 9.26801  | 7.88114  | 21.79785 | Pt | 0 | 0 | 0.00000 |
| HETATM | 247 | Pt | 9.27088  | 13.46635 | 21.79893 | Pt | 0 | 0 | 0.00000 |
| HETATM | 248 | Pt | 9.27004  | 19.04307 | 21.80350 | Pt | 0 | 0 | 0.00000 |
| HETATM | 249 | Pt | 14.10287 | 27.41935 | 21.79719 | Pt | 0 | 0 | 0.00000 |
| HETATM | 250 | Pt | 14.10319 | 10.67182 | 21.79456 | Pt | 0 | 0 | 0.00000 |
| HETATM | 251 | Pt | 14.10094 | 16.25446 | 21.80319 | Pt | 0 | 0 | 0.00000 |
| HETATM | 252 | Pt | 14.10432 | 21.83701 | 21.79422 | Pt | 0 | 0 | 0.00000 |
| HETATM | 253 | Pt | 18.93791 | 30.21042 | 21.79793 | Pt | 0 | 0 | 0.00000 |
| HETATM | 254 | Pt | 18.93826 | 13.46351 | 21.79781 | Pt | 0 | 0 | 0.00000 |
| HETATM | 255 | Pt | 18.93748 | 19.04549 | 21.79865 | Pt | 0 | 0 | 0.00000 |
| HETATM | 256 | Pt | 18.93837 | 24.62818 | 21.79747 | Pt | 0 | 0 | 0.00000 |
| HETATM | 257 | Pt | 2.82268  | 19.04518 | 24.09168 | Pt | 0 | 0 | 0.00000 |
| HETATM | 258 | Pt | 2.82290  | 2.29829  | 24.09043 | Pt | 0 | 0 | 0.00000 |
| HETATM | 259 | Pt | 2.82199  | 7.88136  | 24.09184 | Pt | 0 | 0 | 0.00000 |
| HETATM | 260 | Pt | 2.82380  | 13.46378 | 24.09109 | Pt | 0 | 0 | 0.00000 |
| HETATM | 261 | Pt | 7.65896  | 21.83572 | 24.09226 | Pt | 0 | 0 | 0.00000 |
| HETATM | 262 | Pt | 7.65584  | 5.08978  | 24.09008 | Pt | 0 | 0 | 0.00000 |
| HETATM | 263 | Pt | 7.65620  | 10.67294 | 24.08986 | Pt | 0 | 0 | 0.00000 |
| HETATM | 264 | Pt | 7.65611  | 16.25459 | 24.09056 | Pt | 0 | 0 | 0.00000 |
| HETATM | 265 | Pt | 12.49061 | 24.63009 | 24.08621 | Pt | 0 | 0 | 0.00000 |
| HETATM | 266 | Pt | 12.49152 | 7.87975  | 24.08784 | Pt | 0 | 0 | 0.00000 |
| HETATM | 267 | Pt | 12.49571 | 13.46426 | 24.06978 | Pt | 0 | 0 | 0.00000 |
| HETATM | 268 | Pt | 12.49305 | 19.04291 | 24.09928 | Pt | 0 | 0 | 0.00000 |
| HETATM | 269 | Pt | 17.32600 | 27.41909 | 24.09060 | Pt | 0 | 0 | 0.00000 |
| HETATM | 270 | Pt | 17.32658 | 10.67066 | 24.08864 | Pt | 0 | 0 | 0.00000 |
| HETATM | 271 | Pt | 17.32666 | 16.25559 | 24.09006 | Pt | 0 | 0 | 0.00000 |
| HETATM | 272 | Pt | 17.32895 | 21.83704 | 24.08682 | Pt | 0 | 0 | 0.00000 |
| HETATM | 273 | Pt | 2.82899  | 21.83651 | 24.07799 | Pt | 0 | 0 | 0.00000 |
| HETATM | 274 | Pt | 2.82773  | 5.08991  | 24.07868 | Pt | 0 | 0 | 0.00000 |
| HETATM | 275 | Pt | 2.82944  | 10.67273 | 24.07790 | Pt | 0 | 0 | 0.00000 |
| HETATM | 276 | Pt | 2.82933  | 16.25447 | 24.07852 | Pt | 0 | 0 | 0.00000 |
| HETATM | 277 | Pt | 7.66293  | 24.62789 | 24.07771 | Pt | 0 | 0 | 0.00000 |
| HETATM | 278 | Pt | 7.66253  | 7.88148  | 24.07702 | Pt | 0 | 0 | 0.00000 |
| HETATM | 279 | Pt | 7.66758  | 13.46475 | 24.07833 | Pt | 0 | 0 | 0.00000 |
| HETATM | 280 | Pt | 7.66399  | 19.04576 | 24.07888 | Pt | 0 | 0 | 0.00000 |
| HETATM | 281 | Pt | 12.49682 | 27.41995 | 24.07652 | Pt | 0 | 0 | 0.00000 |
| HETATM | 282 | Pt | 12.49318 | 10.66850 | 24.06977 | Pt | 0 | 0 | 0.00000 |
| HETATM | 283 | Pt | 12.49345 | 16.25695 | 24.09562 | Pt | 0 | 0 | 0.00000 |
| HETATM | 284 | Pt | 12.49870 | 21.83787 | 24.07021 | Pt | 0 | 0 | 0.00000 |
| HETATM | 285 | Pt | 17.33197 | 30.21023 | 24.07728 | Pt | 0 | 0 | 0.00000 |
| HETATM | 286 | Pt | 17.33099 | 13.46316 | 24.07885 | Pt | 0 | 0 | 0.00000 |
| HETATM | 287 | Pt | 17.33184 | 19.04476 | 24.07857 | Pt | 0 | 0 | 0.00000 |
| HETATM | 288 | Pt | 17.33283 | 24.62804 | 24.07654 | Pt | 0 | 0 | 0.00000 |
| HETATM | 289 | Pt | 5.23739  | 20.44620 | 24.07876 | Pt | 0 | 0 | 0.00000 |
| HETATM | 290 | Pt | 5.23620  | 3.69941  | 24.07799 | Pt | 0 | 0 | 0.00000 |
| HETATM | 291 | Pt | 5.23652  | 9.28227  | 24.07837 | Pt | 0 | 0 | 0.00000 |
| HETATM | 292 | Pt | 5.23784  | 14.86426 | 24.07804 | Pt | 0 | 0 | 0.00000 |
| HETATM | 293 | Pt | 10.07090 | 23.23860 | 24.07411 | Pt | 0 | 0 | 0.00000 |
| HETATM | 294 | Pt | 10.07025 | 6.49099  | 24.07612 | Pt | 0 | 0 | 0.00000 |
| HETATM | 295 | Pt | 10.07023 | 12.06678 | 24.06747 | Pt | 0 | 0 | 0.00000 |
| HETATM | 296 | Pt | 10.07611 | 17.64937 | 24.09805 | Pt | 0 | 0 | 0.00000 |
| HETATM | 297 | Pt | 14.90547 | 26.02927 | 24.07648 | Pt | 0 | 0 | 0.00000 |
| HETATM | 298 | Pt | 14.90490 | 9.28216  | 24.07565 | Pt | 0 | 0 | 0.00000 |
| HETATM | 299 | Pt | 14.90847 | 14.86238 | 24.07516 | Pt | 0 | 0 | 0.00000 |
| HETATM | 300 | Pt | 14.90850 | 20.44673 | 24.07258 | Pt | 0 | 0 | 0.00000 |
| HETATM | 301 | Pt | 0.40229  | 17.65511 | 24.07802 | Pt | 0 | 0 | 0.00000 |
| HETATM | 302 | Pt | 0.40294  | 0.90774  | 24.07640 | Pt | 0 | 0 | 0.00000 |
| HETATM | 303 | Pt | 0.40117  | 6.49088  | 24.08021 | Pt | 0 | 0 | 0.00000 |
| HETATM | 304 | Pt | 0.40383  | 12.07331 | 24.07690 | Pt | 0 | 0 | 0.00000 |
| HETATM | 305 | Pt | 5.23750  | 23.22673 | 24.07791 | Pt | 0 | 0 | 0.00000 |
| HETATM | 306 | Pt | 5.23599  | 6.48045  | 24.07847 | Pt | 0 | 0 | 0.00000 |

|        |     |    |          |          |          |    |   |   |         |
|--------|-----|----|----------|----------|----------|----|---|---|---------|
| HETATM | 307 | Pt | 5.23806  | 12.06334 | 24.07777 | Pt | 0 | 0 | 0.00000 |
| HETATM | 308 | Pt | 5.23727  | 17.64528 | 24.07952 | Pt | 0 | 0 | 0.00000 |
| HETATM | 309 | Pt | 10.07020 | 26.01977 | 24.07637 | Pt | 0 | 0 | 0.00000 |
| HETATM | 310 | Pt | 10.07207 | 9.27297  | 24.08028 | Pt | 0 | 0 | 0.00000 |
| HETATM | 311 | Pt | 10.07595 | 14.86561 | 24.08431 | Pt | 0 | 0 | 0.00000 |
| HETATM | 312 | Pt | 10.07405 | 20.43100 | 24.08176 | Pt | 0 | 0 | 0.00000 |
| HETATM | 313 | Pt | 14.90558 | 28.80967 | 24.07693 | Pt | 0 | 0 | 0.00000 |
| HETATM | 314 | Pt | 14.91060 | 12.06220 | 24.06895 | Pt | 0 | 0 | 0.00000 |
| HETATM | 315 | Pt | 14.90009 | 17.64425 | 24.08646 | Pt | 0 | 0 | 0.00000 |
| HETATM | 316 | Pt | 14.90696 | 23.22839 | 24.07218 | Pt | 0 | 0 | 0.00000 |
| HETATM | 317 | Pt | 0.40246  | 20.43561 | 24.07813 | Pt | 0 | 0 | 0.00000 |
| HETATM | 318 | Pt | 0.40180  | 3.68855  | 24.07773 | Pt | 0 | 0 | 0.00000 |
| HETATM | 319 | Pt | 0.40297  | 9.27136  | 24.07757 | Pt | 0 | 0 | 0.00000 |
| HETATM | 320 | Pt | 0.40267  | 14.85373 | 24.07765 | Pt | 0 | 0 | 0.00000 |
| HETATM | 321 | Pt | 3.62346  | 20.43292 | 26.38071 | Pt | 0 | 0 | 0.00000 |
| HETATM | 322 | Pt | 3.62223  | 3.68661  | 26.38085 | Pt | 0 | 0 | 0.00000 |
| HETATM | 323 | Pt | 3.62351  | 9.26929  | 26.38140 | Pt | 0 | 0 | 0.00000 |
| HETATM | 324 | Pt | 3.62597  | 14.85138 | 26.38157 | Pt | 0 | 0 | 0.00000 |
| HETATM | 325 | Pt | 8.45841  | 23.22531 | 26.38100 | Pt | 0 | 0 | 0.00000 |
| HETATM | 326 | Pt | 8.45692  | 6.47769  | 26.37868 | Pt | 0 | 0 | 0.00000 |
| HETATM | 327 | Pt | 8.45915  | 12.06219 | 26.38228 | Pt | 0 | 0 | 0.00000 |
| HETATM | 328 | Pt | 8.45613  | 17.64690 | 26.37558 | Pt | 0 | 0 | 0.00000 |
| HETATM | 329 | Pt | 13.29190 | 26.01863 | 26.37844 | Pt | 0 | 0 | 0.00000 |
| HETATM | 330 | Pt | 13.29417 | 9.26881  | 26.37672 | Pt | 0 | 0 | 0.00000 |
| HETATM | 331 | Pt | 13.29954 | 14.85329 | 26.36604 | Pt | 0 | 0 | 0.00000 |
| HETATM | 332 | Pt | 13.29668 | 20.43829 | 26.36574 | Pt | 0 | 0 | 0.00000 |
| HETATM | 333 | Pt | 18.12689 | 28.80713 | 26.38057 | Pt | 0 | 0 | 0.00000 |
| HETATM | 334 | Pt | 18.12762 | 12.05891 | 26.37427 | Pt | 0 | 0 | 0.00000 |
| HETATM | 335 | Pt | 18.12294 | 17.64128 | 26.38809 | Pt | 0 | 0 | 0.00000 |
| HETATM | 336 | Pt | 18.12889 | 23.22486 | 26.37840 | Pt | 0 | 0 | 0.00000 |
| HETATM | 337 | Pt | 3.62342  | 23.24027 | 26.38003 | Pt | 0 | 0 | 0.00000 |
| HETATM | 338 | Pt | 3.62186  | 6.49375  | 26.38162 | Pt | 0 | 0 | 0.00000 |
| HETATM | 339 | Pt | 3.62522  | 12.07562 | 26.38107 | Pt | 0 | 0 | 0.00000 |
| HETATM | 340 | Pt | 3.62514  | 17.65686 | 26.38236 | Pt | 0 | 0 | 0.00000 |
| HETATM | 341 | Pt | 8.45714  | 26.03245 | 26.37969 | Pt | 0 | 0 | 0.00000 |
| HETATM | 342 | Pt | 8.46021  | 9.28551  | 26.37612 | Pt | 0 | 0 | 0.00000 |
| HETATM | 343 | Pt | 8.46640  | 14.86294 | 26.37918 | Pt | 0 | 0 | 0.00000 |
| HETATM | 344 | Pt | 8.46250  | 20.45027 | 26.38436 | Pt | 0 | 0 | 0.00000 |
| HETATM | 345 | Pt | 13.29179 | 28.82462 | 26.37932 | Pt | 0 | 0 | 0.00000 |
| HETATM | 346 | Pt | 13.29213 | 12.06457 | 26.33708 | Pt | 0 | 0 | 0.00000 |
| HETATM | 347 | Pt | 13.28392 | 17.65231 | 26.41887 | Pt | 0 | 0 | 0.00000 |
| HETATM | 348 | Pt | 13.29212 | 23.24580 | 26.36769 | Pt | 0 | 0 | 0.00000 |
| HETATM | 349 | Pt | 18.12546 | 31.61462 | 26.38041 | Pt | 0 | 0 | 0.00000 |
| HETATM | 350 | Pt | 18.12361 | 14.86370 | 26.37897 | Pt | 0 | 0 | 0.00000 |
| HETATM | 351 | Pt | 18.12731 | 20.44835 | 26.37912 | Pt | 0 | 0 | 0.00000 |
| HETATM | 352 | Pt | 18.12740 | 26.03130 | 26.38021 | Pt | 0 | 0 | 0.00000 |
| HETATM | 353 | Pt | 6.05522  | 21.83668 | 26.38087 | Pt | 0 | 0 | 0.00000 |
| HETATM | 354 | Pt | 6.05301  | 5.09029  | 26.38077 | Pt | 0 | 0 | 0.00000 |
| HETATM | 355 | Pt | 6.05634  | 10.67306 | 26.38105 | Pt | 0 | 0 | 0.00000 |
| HETATM | 356 | Pt | 6.05843  | 16.25406 | 26.38116 | Pt | 0 | 0 | 0.00000 |
| HETATM | 357 | Pt | 10.88787 | 24.63074 | 26.37680 | Pt | 0 | 0 | 0.00000 |
| HETATM | 358 | Pt | 10.88832 | 7.88238  | 26.37524 | Pt | 0 | 0 | 0.00000 |
| HETATM | 359 | Pt | 10.87977 | 13.44742 | 26.32372 | Pt | 0 | 0 | 0.00000 |
| HETATM | 360 | Pt | 10.89430 | 19.03666 | 26.39582 | Pt | 0 | 0 | 0.00000 |
| HETATM | 361 | Pt | 15.72281 | 27.41966 | 26.38023 | Pt | 0 | 0 | 0.00000 |
| HETATM | 362 | Pt | 15.71902 | 10.67168 | 26.37805 | Pt | 0 | 0 | 0.00000 |
| HETATM | 363 | Pt | 15.72799 | 16.25568 | 26.37464 | Pt | 0 | 0 | 0.00000 |
| HETATM | 364 | Pt | 15.72754 | 21.83920 | 26.36851 | Pt | 0 | 0 | 0.00000 |
| HETATM | 365 | Pt | 1.21941  | 19.04515 | 26.38128 | Pt | 0 | 0 | 0.00000 |
| HETATM | 366 | Pt | 1.21945  | 2.29836  | 26.37939 | Pt | 0 | 0 | 0.00000 |
| HETATM | 367 | Pt | 1.21775  | 7.88082  | 26.38245 | Pt | 0 | 0 | 0.00000 |
| HETATM | 368 | Pt | 1.22134  | 13.46366 | 26.38001 | Pt | 0 | 0 | 0.00000 |
| HETATM | 369 | Pt | 6.04479  | 24.62851 | 26.30435 | Pt | 0 | 0 | 0.00000 |

|        |     |    |          |          |          |    |   |   |         |
|--------|-----|----|----------|----------|----------|----|---|---|---------|
| HETATM | 370 | Pt | 6.04534  | 7.88181  | 26.30519 | Pt | 0 | 0 | 0.00000 |
| HETATM | 371 | Pt | 6.04738  | 13.46367 | 26.30400 | Pt | 0 | 0 | 0.00000 |
| HETATM | 372 | Pt | 6.04647  | 19.04609 | 26.30764 | Pt | 0 | 0 | 0.00000 |
| HETATM | 373 | Pt | 10.87901 | 27.42119 | 26.30402 | Pt | 0 | 0 | 0.00000 |
| HETATM | 374 | Pt | 10.88620 | 10.67977 | 26.32346 | Pt | 0 | 0 | 0.00000 |
| HETATM | 375 | Pt | 10.90006 | 16.25560 | 26.38019 | Pt | 0 | 0 | 0.00000 |
| HETATM | 376 | Pt | 10.88024 | 21.84219 | 26.29412 | Pt | 0 | 0 | 0.00000 |
| HETATM | 377 | Pt | 15.71434 | 30.21000 | 26.30334 | Pt | 0 | 0 | 0.00000 |
| HETATM | 378 | Pt | 15.70710 | 13.46080 | 26.31397 | Pt | 0 | 0 | 0.00000 |
| HETATM | 379 | Pt | 15.71664 | 19.04616 | 26.30496 | Pt | 0 | 0 | 0.00000 |
| HETATM | 380 | Pt | 15.71458 | 24.62860 | 26.30217 | Pt | 0 | 0 | 0.00000 |
| HETATM | 381 | Pt | 1.21044  | 21.83643 | 26.30507 | Pt | 0 | 0 | 0.00000 |
| HETATM | 382 | Pt | 1.20870  | 5.08929  | 26.30548 | Pt | 0 | 0 | 0.00000 |
| HETATM | 383 | Pt | 1.21135  | 10.67232 | 26.30445 | Pt | 0 | 0 | 0.00000 |
| HETATM | 384 | Pt | 1.21139  | 16.25428 | 26.30463 | Pt | 0 | 0 | 0.00000 |
| HETATM | 385 | Pt | 2.02996  | 17.67063 | 28.75723 | Pt | 0 | 0 | 0.00000 |
| HETATM | 386 | Pt | 2.02672  | 23.25447 | 28.75708 | Pt | 0 | 0 | 0.00000 |
| HETATM | 387 | Pt | 2.02367  | 6.50641  | 28.75972 | Pt | 0 | 0 | 0.00000 |
| HETATM | 388 | Pt | 2.02951  | 12.08818 | 28.75697 | Pt | 0 | 0 | 0.00000 |
| HETATM | 389 | Pt | 6.86447  | 20.46537 | 28.75899 | Pt | 0 | 0 | 0.00000 |
| HETATM | 390 | Pt | 6.86280  | 26.04679 | 28.75721 | Pt | 0 | 0 | 0.00000 |
| HETATM | 391 | Pt | 6.87469  | 9.30382  | 28.75744 | Pt | 0 | 0 | 0.00000 |
| HETATM | 392 | Pt | 6.88222  | 14.87847 | 28.74818 | Pt | 0 | 0 | 0.00000 |
| HETATM | 393 | Pt | 11.69883 | 23.24177 | 28.74476 | Pt | 0 | 0 | 0.00000 |
| HETATM | 394 | Pt | 11.69773 | 28.84677 | 28.75777 | Pt | 0 | 0 | 0.00000 |
| HETATM | 395 | Pt | 11.70590 | 12.08505 | 28.67381 | Pt | 0 | 0 | 0.00000 |
| HETATM | 396 | Pt | 11.65591 | 17.63518 | 29.39991 | Pt | 0 | 0 | 0.00000 |
| HETATM | 397 | Pt | 16.53168 | 26.04767 | 28.75684 | Pt | 0 | 0 | 0.00000 |
| HETATM | 398 | Pt | 16.52549 | 31.63822 | 28.75575 | Pt | 0 | 0 | 0.00000 |
| HETATM | 399 | Pt | 16.50466 | 14.86522 | 28.74967 | Pt | 0 | 0 | 0.00000 |
| HETATM | 400 | Pt | 16.51019 | 20.45626 | 28.74730 | Pt | 0 | 0 | 0.00000 |
| HETATM | 401 | Pt | 2.02706  | 20.41881 | 28.75825 | Pt | 0 | 0 | 0.00000 |
| HETATM | 402 | Pt | 2.02475  | 3.67320  | 28.75892 | Pt | 0 | 0 | 0.00000 |
| HETATM | 403 | Pt | 2.02771  | 9.25433  | 28.75818 | Pt | 0 | 0 | 0.00000 |
| HETATM | 404 | Pt | 2.03230  | 14.83583 | 28.75718 | Pt | 0 | 0 | 0.00000 |
| HETATM | 405 | Pt | 6.86180  | 23.21241 | 28.75708 | Pt | 0 | 0 | 0.00000 |
| HETATM | 406 | Pt | 6.86273  | 6.46467  | 28.75819 | Pt | 0 | 0 | 0.00000 |
| HETATM | 407 | Pt | 6.87580  | 12.04311 | 28.76115 | Pt | 0 | 0 | 0.00000 |
| HETATM | 408 | Pt | 6.86736  | 17.62697 | 28.76390 | Pt | 0 | 0 | 0.00000 |
| HETATM | 409 | Pt | 11.69653 | 25.99769 | 28.75668 | Pt | 0 | 0 | 0.00000 |
| HETATM | 410 | Pt | 11.68873 | 9.27354  | 28.73106 | Pt | 0 | 0 | 0.00000 |
| HETATM | 411 | Pt | 11.69537 | 14.84553 | 28.69154 | Pt | 0 | 0 | 0.00000 |
| HETATM | 412 | Pt | 11.69808 | 20.41657 | 28.71845 | Pt | 0 | 0 | 0.00000 |
| HETATM | 413 | Pt | 16.53030 | 28.79613 | 28.75850 | Pt | 0 | 0 | 0.00000 |
| HETATM | 414 | Pt | 16.52816 | 12.06090 | 28.72647 | Pt | 0 | 0 | 0.00000 |
| HETATM | 415 | Pt | 16.53201 | 17.63148 | 28.80654 | Pt | 0 | 0 | 0.00000 |
| HETATM | 416 | Pt | 16.53417 | 23.20952 | 28.75447 | Pt | 0 | 0 | 0.00000 |
| HETATM | 417 | Pt | 4.40777  | 19.04654 | 28.75821 | Pt | 0 | 0 | 0.00000 |
| HETATM | 418 | Pt | 4.40550  | 24.62925 | 28.75753 | Pt | 0 | 0 | 0.00000 |
| HETATM | 419 | Pt | 4.40716  | 7.88143  | 28.75876 | Pt | 0 | 0 | 0.00000 |
| HETATM | 420 | Pt | 4.41298  | 13.46135 | 28.75922 | Pt | 0 | 0 | 0.00000 |
| HETATM | 421 | Pt | 9.24354  | 21.84279 | 28.76658 | Pt | 0 | 0 | 0.00000 |
| HETATM | 422 | Pt | 9.24270  | 27.42020 | 28.75774 | Pt | 0 | 0 | 0.00000 |
| HETATM | 423 | Pt | 9.26737  | 10.67416 | 28.73434 | Pt | 0 | 0 | 0.00000 |
| HETATM | 424 | Pt | 9.25763  | 16.27101 | 28.70399 | Pt | 0 | 0 | 0.00000 |
| HETATM | 425 | Pt | 14.07457 | 24.63205 | 28.75386 | Pt | 0 | 0 | 0.00000 |
| HETATM | 426 | Pt | 14.06967 | 30.21909 | 28.75772 | Pt | 0 | 0 | 0.00000 |
| HETATM | 427 | Pt | 14.09911 | 13.42160 | 28.62246 | Pt | 0 | 0 | 0.00000 |
| HETATM | 428 | Pt | 14.04221 | 19.04390 | 28.73513 | Pt | 0 | 0 | 0.00000 |
| HETATM | 429 | Pt | 18.91121 | 27.41992 | 28.75704 | Pt | 0 | 0 | 0.00000 |
| HETATM | 430 | Pt | 18.90416 | 33.00317 | 28.76038 | Pt | 0 | 0 | 0.00000 |
| HETATM | 431 | Pt | 18.89428 | 16.24569 | 28.75808 | Pt | 0 | 0 | 0.00000 |
| HETATM | 432 | Pt | 18.90231 | 21.82872 | 28.75636 | Pt | 0 | 0 | 0.00000 |

|                      |     |    |          |          |          |    |   |   |         |
|----------------------|-----|----|----------|----------|----------|----|---|---|---------|
| HETATM               | 433 | Pt | 4.43236  | 21.83731 | 28.58803 | Pt | 0 | 0 | 0.00000 |
| HETATM               | 434 | Pt | 4.43150  | 5.09036  | 28.58926 | Pt | 0 | 0 | 0.00000 |
| HETATM               | 435 | Pt | 4.43879  | 10.67157 | 28.58964 | Pt | 0 | 0 | 0.00000 |
| HETATM               | 436 | Pt | 4.44160  | 16.25232 | 28.59131 | Pt | 0 | 0 | 0.00000 |
| HETATM               | 437 | Pt | 9.26854  | 24.62939 | 28.58728 | Pt | 0 | 0 | 0.00000 |
| HETATM               | 438 | Pt | 9.26761  | 7.87914  | 28.58418 | Pt | 0 | 0 | 0.00000 |
| HETATM               | 439 | Pt | 9.28797  | 13.45766 | 28.61356 | Pt | 0 | 0 | 0.00000 |
| HETATM               | 440 | Pt | 9.27042  | 19.05158 | 28.59737 | Pt | 0 | 0 | 0.00000 |
| HETATM               | 441 | Pt | 14.09928 | 27.42384 | 28.58811 | Pt | 0 | 0 | 0.00000 |
| HETATM               | 442 | Pt | 14.08936 | 10.68376 | 28.59566 | Pt | 0 | 0 | 0.00000 |
| HETATM               | 443 | Pt | 14.04911 | 16.25219 | 28.68200 | Pt | 0 | 0 | 0.00000 |
| HETATM               | 444 | Pt | 14.11035 | 21.85531 | 28.56427 | Pt | 0 | 0 | 0.00000 |
| HETATM               | 445 | Pt | 18.93393 | 30.21323 | 28.58928 | Pt | 0 | 0 | 0.00000 |
| HETATM               | 446 | Pt | 18.93572 | 13.46315 | 28.58526 | Pt | 0 | 0 | 0.00000 |
| HETATM               | 447 | Pt | 18.93171 | 19.04308 | 28.59177 | Pt | 0 | 0 | 0.00000 |
| HETATM               | 448 | Pt | 18.93776 | 24.62610 | 28.58802 | Pt | 0 | 0 | 0.00000 |
| HETATM               | 449 | O  | 2.82200  | 19.04515 | 29.87700 | O  | 0 | 0 | 0.00000 |
| HETATM               | 450 | O  | 2.81970  | 2.29808  | 29.87704 | O  | 0 | 0 | 0.00000 |
| HETATM               | 451 | O  | 2.82035  | 7.88134  | 29.87747 | O  | 0 | 0 | 0.00000 |
| HETATM               | 452 | O  | 2.82383  | 13.46189 | 29.87660 | O  | 0 | 0 | 0.00000 |
| HETATM               | 453 | O  | 7.65119  | 21.84151 | 29.88015 | O  | 0 | 0 | 0.00000 |
| HETATM               | 454 | O  | 7.65625  | 5.09010  | 29.87676 | O  | 0 | 0 | 0.00000 |
| HETATM               | 455 | O  | 7.67033  | 10.67018 | 29.86990 | O  | 0 | 0 | 0.00000 |
| HETATM               | 456 | O  | 7.69808  | 16.24230 | 29.85532 | O  | 0 | 0 | 0.00000 |
| HETATM               | 457 | O  | 12.49129 | 24.62345 | 29.87048 | O  | 0 | 0 | 0.00000 |
| HETATM               | 458 | O  | 12.48507 | 7.89319  | 29.86783 | O  | 0 | 0 | 0.00000 |
| HETATM               | 459 | O  | 12.65502 | 15.93525 | 29.95874 | O  | 0 | 0 | 0.00000 |
| HETATM               | 460 | O  | 12.63070 | 19.34473 | 29.98345 | O  | 0 | 0 | 0.00000 |
| HETATM               | 461 | O  | 17.32453 | 27.41952 | 29.87633 | O  | 0 | 0 | 0.00000 |
| HETATM               | 462 | O  | 17.31366 | 10.68158 | 29.86713 | O  | 0 | 0 | 0.00000 |
| HETATM               | 463 | O  | 17.33279 | 16.23732 | 29.88756 | O  | 0 | 0 | 0.00000 |
| HETATM               | 464 | O  | 17.31614 | 21.83271 | 29.87046 | O  | 0 | 0 | 0.00000 |
| UNIT ENERGY kcal     |     |    |          |          |          |    |   |   |         |
| ENERGY -58952.849168 |     |    |          |          |          |    |   |   |         |
| END                  |     |    |          |          |          |    |   |   |         |
