# Supplementary material for: Development of a ReaxFF potential for Pt–O systems describing the energetics and dynamics of Pt-oxide formation
Source: Royal Society of Chemistry journal article supplement (doi:10.1039/c4cp03111c), 2014-01-01
Supplement: c4cp03111c1.zip [file c4cp03111c1.zip]

```

XTLGRF 200
DESCRP IS
REMARK Pt111_0.06ML_8x8x7_30.0_vac fcc-displacement
FIXATOMS      1      128
CRYSTX      22.32970      22.32970      43.67409      90.00000      90.00000      60.00000
FORMAT ATOM      (a6,lx,i5,lx,a5,lx,a3,lx,a1,lx,a5,3f10.5,lx,a5,i3,i2,lx,f8.5)
HETATM      1 Pt      2.01622      12.06214      14.99181      Pt      0 0      0.00000
HETATM      2 Pt      2.01622      23.22699      14.99181      Pt      0 0      0.00000
HETATM      3 Pt      11.68526      17.64457      14.99181      Pt      0 0      0.00000
HETATM      4 Pt      11.68526      28.80942      14.99181      Pt      0 0      0.00000
HETATM      5 Pt      2.01622      14.85335      14.99181      Pt      0 0      0.00000
HETATM      6 Pt      2.01622      3.68850      14.99181      Pt      0 0      0.00000
HETATM      7 Pt      11.68526      20.43578      14.99181      Pt      0 0      0.00000
HETATM      8 Pt      11.68526      9.27093      14.99181      Pt      0 0      0.00000
HETATM      9 Pt      2.01622      17.64456      14.99181      Pt      0 0      0.00000
HETATM     10 Pt      2.01622      6.47971      14.99181      Pt      0 0      0.00000
HETATM     11 Pt      11.68526      23.22698      14.99181      Pt      0 0      0.00000
HETATM     12 Pt      11.68526      12.06214      14.99181      Pt      0 0      0.00000
HETATM     13 Pt      2.01622      20.43578      14.99181      Pt      0 0      0.00000
HETATM     14 Pt      2.01622      9.27093      14.99181      Pt      0 0      0.00000
HETATM     15 Pt      11.68526      26.01821      14.99181      Pt      0 0      0.00000
HETATM     16 Pt      11.68526      14.85336      14.99181      Pt      0 0      0.00000
HETATM     17 Pt      4.43348      13.45775      14.99181      Pt      0 0      0.00000
HETATM     18 Pt      4.43348      24.62260      14.99181      Pt      0 0      0.00000
HETATM     19 Pt      14.10252      19.04018      14.99181      Pt      0 0      0.00000
HETATM     20 Pt      14.10252      30.20502      14.99181      Pt      0 0      0.00000
HETATM     21 Pt      4.43348      16.24896      14.99181      Pt      0 0      0.00000
HETATM     22 Pt      4.43348      5.08411      14.99181      Pt      0 0      0.00000
HETATM     23 Pt      14.10252      21.83139      14.99181      Pt      0 0      0.00000
HETATM     24 Pt      14.10252      10.66653      14.99181      Pt      0 0      0.00000
HETATM     25 Pt      4.43348      19.04017      14.99181      Pt      0 0      0.00000
HETATM     26 Pt      4.43348      7.87532      14.99181      Pt      0 0      0.00000
HETATM     27 Pt      14.10252      24.62260      14.99181      Pt      0 0      0.00000
HETATM     28 Pt      14.10252      13.45774      14.99181      Pt      0 0      0.00000
HETATM     29 Pt      4.43348      21.83138      14.99181      Pt      0 0      0.00000
HETATM     30 Pt      4.43348      10.66653      14.99181      Pt      0 0      0.00000
HETATM     31 Pt      14.10252      27.41381      14.99181      Pt      0 0      0.00000
HETATM     32 Pt      14.10252      16.24895      14.99181      Pt      0 0      0.00000
HETATM     33 Pt      6.85074      14.85335      14.99181      Pt      0 0      0.00000
HETATM     34 Pt      6.85074      26.01820      14.99181      Pt      0 0      0.00000
HETATM     35 Pt      16.51978      20.43578      14.99181      Pt      0 0      0.00000
HETATM     36 Pt      16.51978      31.60063      14.99181      Pt      0 0      0.00000
HETATM     37 Pt      6.85074      17.64456      14.99181      Pt      0 0      0.00000
HETATM     38 Pt      6.85074      6.47971      14.99181      Pt      0 0      0.00000
HETATM     39 Pt      16.51978      23.22698      14.99181      Pt      0 0      0.00000
HETATM     40 Pt      16.51978      12.06214      14.99181      Pt      0 0      0.00000
HETATM     41 Pt      6.85074      20.43578      14.99181      Pt      0 0      0.00000
HETATM     42 Pt      6.85074      9.27093      14.99181      Pt      0 0      0.00000
HETATM     43 Pt      16.51978      26.01821      14.99181      Pt      0 0      0.00000
HETATM     44 Pt      16.51978      14.85336      14.99181      Pt      0 0      0.00000
HETATM     45 Pt      6.85074      23.22699      14.99181      Pt      0 0      0.00000
HETATM     46 Pt      6.85074      12.06214      14.99181      Pt      0 0      0.00000
HETATM     47 Pt      16.51978      28.80942      14.99181      Pt      0 0      0.00000
HETATM     48 Pt      16.51978      17.64457      14.99181      Pt      0 0      0.00000
HETATM     49 Pt      9.26800      16.24896      14.99181      Pt      0 0      0.00000
HETATM     50 Pt      9.26800      27.41381      14.99181      Pt      0 0      0.00000
HETATM     51 Pt      18.93704      21.83139      14.99181      Pt      0 0      0.00000
HETATM     52 Pt      18.93704      32.99623      14.99181      Pt      0 0      0.00000
HETATM     53 Pt      9.26800      19.04017      14.99181      Pt      0 0      0.00000
HETATM     54 Pt      9.26800      7.87532      14.99181      Pt      0 0      0.00000
HETATM     55 Pt      18.93704      24.62260      14.99181      Pt      0 0      0.00000
HETATM     56 Pt      18.93704      13.45774      14.99181      Pt      0 0      0.00000
HETATM     57 Pt      9.26800      21.83138      14.99181      Pt      0 0      0.00000

```

|        |     |    |          |          |          |    |   |   |         |
|--------|-----|----|----------|----------|----------|----|---|---|---------|
| HETATM | 58  | Pt | 9.26800  | 10.66653 | 14.99181 | Pt | 0 | 0 | 0.00000 |
| HETATM | 59  | Pt | 18.93704 | 27.41381 | 14.99181 | Pt | 0 | 0 | 0.00000 |
| HETATM | 60  | Pt | 18.93704 | 16.24895 | 14.99181 | Pt | 0 | 0 | 0.00000 |
| HETATM | 61  | Pt | 9.26800  | 24.62259 | 14.99181 | Pt | 0 | 0 | 0.00000 |
| HETATM | 62  | Pt | 9.26800  | 13.45774 | 14.99181 | Pt | 0 | 0 | 0.00000 |
| HETATM | 63  | Pt | 18.93704 | 30.20502 | 14.99181 | Pt | 0 | 0 | 0.00000 |
| HETATM | 64  | Pt | 18.93704 | 19.04016 | 14.99181 | Pt | 0 | 0 | 0.00000 |
| HETATM | 65  | Pt | 2.82197  | 13.45775 | 17.27083 | Pt | 0 | 0 | 0.00000 |
| HETATM | 66  | Pt | 2.82197  | 2.29290  | 17.27083 | Pt | 0 | 0 | 0.00000 |
| HETATM | 67  | Pt | 12.49101 | 19.04018 | 17.27083 | Pt | 0 | 0 | 0.00000 |
| HETATM | 68  | Pt | 12.49101 | 7.87532  | 17.27083 | Pt | 0 | 0 | 0.00000 |
| HETATM | 69  | Pt | 2.82197  | 16.24896 | 17.27083 | Pt | 0 | 0 | 0.00000 |
| HETATM | 70  | Pt | 2.82197  | 5.08411  | 17.27083 | Pt | 0 | 0 | 0.00000 |
| HETATM | 71  | Pt | 12.49101 | 21.83139 | 17.27083 | Pt | 0 | 0 | 0.00000 |
| HETATM | 72  | Pt | 12.49101 | 10.66653 | 17.27083 | Pt | 0 | 0 | 0.00000 |
| HETATM | 73  | Pt | 2.82197  | 19.04017 | 17.27083 | Pt | 0 | 0 | 0.00000 |
| HETATM | 74  | Pt | 2.82197  | 7.87532  | 17.27083 | Pt | 0 | 0 | 0.00000 |
| HETATM | 75  | Pt | 12.49101 | 24.62260 | 17.27083 | Pt | 0 | 0 | 0.00000 |
| HETATM | 76  | Pt | 12.49101 | 13.45774 | 17.27083 | Pt | 0 | 0 | 0.00000 |
| HETATM | 77  | Pt | 2.82197  | 21.83138 | 17.27083 | Pt | 0 | 0 | 0.00000 |
| HETATM | 78  | Pt | 2.82197  | 10.66653 | 17.27083 | Pt | 0 | 0 | 0.00000 |
| HETATM | 79  | Pt | 12.49101 | 27.41381 | 17.27083 | Pt | 0 | 0 | 0.00000 |
| HETATM | 80  | Pt | 12.49101 | 16.24895 | 17.27083 | Pt | 0 | 0 | 0.00000 |
| HETATM | 81  | Pt | 5.23923  | 14.85335 | 17.27083 | Pt | 0 | 0 | 0.00000 |
| HETATM | 82  | Pt | 5.23923  | 3.68850  | 17.27083 | Pt | 0 | 0 | 0.00000 |
| HETATM | 83  | Pt | 14.90827 | 20.43578 | 17.27083 | Pt | 0 | 0 | 0.00000 |
| HETATM | 84  | Pt | 14.90827 | 9.27093  | 17.27083 | Pt | 0 | 0 | 0.00000 |
| HETATM | 85  | Pt | 5.23923  | 17.64456 | 17.27083 | Pt | 0 | 0 | 0.00000 |
| HETATM | 86  | Pt | 5.23923  | 6.47971  | 17.27083 | Pt | 0 | 0 | 0.00000 |
| HETATM | 87  | Pt | 14.90827 | 23.22698 | 17.27083 | Pt | 0 | 0 | 0.00000 |
| HETATM | 88  | Pt | 14.90827 | 12.06214 | 17.27083 | Pt | 0 | 0 | 0.00000 |
| HETATM | 89  | Pt | 5.23923  | 20.43578 | 17.27083 | Pt | 0 | 0 | 0.00000 |
| HETATM | 90  | Pt | 5.23923  | 9.27093  | 17.27083 | Pt | 0 | 0 | 0.00000 |
| HETATM | 91  | Pt | 14.90827 | 26.01821 | 17.27083 | Pt | 0 | 0 | 0.00000 |
| HETATM | 92  | Pt | 14.90827 | 14.85336 | 17.27083 | Pt | 0 | 0 | 0.00000 |
| HETATM | 93  | Pt | 5.23923  | 23.22699 | 17.27083 | Pt | 0 | 0 | 0.00000 |
| HETATM | 94  | Pt | 5.23923  | 12.06214 | 17.27083 | Pt | 0 | 0 | 0.00000 |
| HETATM | 95  | Pt | 14.90827 | 28.80942 | 17.27083 | Pt | 0 | 0 | 0.00000 |
| HETATM | 96  | Pt | 14.90827 | 17.64457 | 17.27083 | Pt | 0 | 0 | 0.00000 |
| HETATM | 97  | Pt | 7.65649  | 16.24896 | 17.27083 | Pt | 0 | 0 | 0.00000 |
| HETATM | 98  | Pt | 7.65649  | 5.08411  | 17.27083 | Pt | 0 | 0 | 0.00000 |
| HETATM | 99  | Pt | 17.32553 | 21.83139 | 17.27083 | Pt | 0 | 0 | 0.00000 |
| HETATM | 100 | Pt | 17.32553 | 10.66653 | 17.27083 | Pt | 0 | 0 | 0.00000 |
| HETATM | 101 | Pt | 7.65649  | 19.04017 | 17.27083 | Pt | 0 | 0 | 0.00000 |
| HETATM | 102 | Pt | 7.65649  | 7.87532  | 17.27083 | Pt | 0 | 0 | 0.00000 |
| HETATM | 103 | Pt | 17.32553 | 24.62260 | 17.27083 | Pt | 0 | 0 | 0.00000 |
| HETATM | 104 | Pt | 17.32553 | 13.45774 | 17.27083 | Pt | 0 | 0 | 0.00000 |
| HETATM | 105 | Pt | 7.65649  | 21.83138 | 17.27083 | Pt | 0 | 0 | 0.00000 |
| HETATM | 106 | Pt | 7.65649  | 10.66653 | 17.27083 | Pt | 0 | 0 | 0.00000 |
| HETATM | 107 | Pt | 17.32553 | 27.41381 | 17.27083 | Pt | 0 | 0 | 0.00000 |
| HETATM | 108 | Pt | 17.32553 | 16.24895 | 17.27083 | Pt | 0 | 0 | 0.00000 |
| HETATM | 109 | Pt | 7.65649  | 24.62259 | 17.27083 | Pt | 0 | 0 | 0.00000 |
| HETATM | 110 | Pt | 7.65649  | 13.45774 | 17.27083 | Pt | 0 | 0 | 0.00000 |
| HETATM | 111 | Pt | 17.32553 | 30.20502 | 17.27083 | Pt | 0 | 0 | 0.00000 |
| HETATM | 112 | Pt | 17.32553 | 19.04016 | 17.27083 | Pt | 0 | 0 | 0.00000 |
| HETATM | 113 | Pt | 10.07376 | 17.64456 | 17.27083 | Pt | 0 | 0 | 0.00000 |
| HETATM | 114 | Pt | 10.07376 | 6.47971  | 17.27083 | Pt | 0 | 0 | 0.00000 |
| HETATM | 115 | Pt | 0.40471  | 12.06213 | 17.27083 | Pt | 0 | 0 | 0.00000 |
| HETATM | 116 | Pt | 0.40471  | 0.89729  | 17.27083 | Pt | 0 | 0 | 0.00000 |
| HETATM | 117 | Pt | 10.07376 | 20.43578 | 17.27083 | Pt | 0 | 0 | 0.00000 |
| HETATM | 118 | Pt | 10.07376 | 9.27093  | 17.27083 | Pt | 0 | 0 | 0.00000 |
| HETATM | 119 | Pt | 0.40471  | 14.85336 | 17.27083 | Pt | 0 | 0 | 0.00000 |
| HETATM | 120 | Pt | 0.40471  | 3.68851  | 17.27083 | Pt | 0 | 0 | 0.00000 |

|        |     |    |          |          |          |    |   |   |         |
|--------|-----|----|----------|----------|----------|----|---|---|---------|
| HETATM | 121 | Pt | 10.07376 | 23.22699 | 17.27083 | Pt | 0 | 0 | 0.00000 |
| HETATM | 122 | Pt | 10.07376 | 12.06214 | 17.27083 | Pt | 0 | 0 | 0.00000 |
| HETATM | 123 | Pt | 0.40471  | 17.64457 | 17.27083 | Pt | 0 | 0 | 0.00000 |
| HETATM | 124 | Pt | 0.40471  | 6.47972  | 17.27083 | Pt | 0 | 0 | 0.00000 |
| HETATM | 125 | Pt | 10.07376 | 26.01820 | 17.27083 | Pt | 0 | 0 | 0.00000 |
| HETATM | 126 | Pt | 10.07376 | 14.85335 | 17.27083 | Pt | 0 | 0 | 0.00000 |
| HETATM | 127 | Pt | 0.40471  | 20.43578 | 17.27083 | Pt | 0 | 0 | 0.00000 |
| HETATM | 128 | Pt | 0.40471  | 9.27093  | 17.27083 | Pt | 0 | 0 | 0.00000 |
| HETATM | 129 | Pt | 3.62732  | 14.85265 | 19.55122 | Pt | 0 | 0 | 0.00000 |
| HETATM | 130 | Pt | 3.62730  | 3.68859  | 19.55103 | Pt | 0 | 0 | 0.00000 |
| HETATM | 131 | Pt | 13.29705 | 20.43546 | 19.55104 | Pt | 0 | 0 | 0.00000 |
| HETATM | 132 | Pt | 13.29680 | 9.27099  | 19.54896 | Pt | 0 | 0 | 0.00000 |
| HETATM | 133 | Pt | 3.62763  | 17.64402 | 19.54926 | Pt | 0 | 0 | 0.00000 |
| HETATM | 134 | Pt | 3.62772  | 6.47979  | 19.54951 | Pt | 0 | 0 | 0.00000 |
| HETATM | 135 | Pt | 13.29724 | 23.22696 | 19.54970 | Pt | 0 | 0 | 0.00000 |
| HETATM | 136 | Pt | 13.29681 | 12.06244 | 19.54912 | Pt | 0 | 0 | 0.00000 |
| HETATM | 137 | Pt | 3.62796  | 20.43595 | 19.54858 | Pt | 0 | 0 | 0.00000 |
| HETATM | 138 | Pt | 3.62777  | 9.27112  | 19.54956 | Pt | 0 | 0 | 0.00000 |
| HETATM | 139 | Pt | 13.29704 | 26.01817 | 19.54918 | Pt | 0 | 0 | 0.00000 |
| HETATM | 140 | Pt | 13.29711 | 14.85352 | 19.54986 | Pt | 0 | 0 | 0.00000 |
| HETATM | 141 | Pt | 3.62730  | 23.22761 | 19.55070 | Pt | 0 | 0 | 0.00000 |
| HETATM | 142 | Pt | 3.62749  | 12.06219 | 19.55117 | Pt | 0 | 0 | 0.00000 |
| HETATM | 143 | Pt | 13.29691 | 28.80924 | 19.54882 | Pt | 0 | 0 | 0.00000 |
| HETATM | 144 | Pt | 13.29703 | 17.64460 | 19.55133 | Pt | 0 | 0 | 0.00000 |
| HETATM | 145 | Pt | 6.04456  | 16.24861 | 19.54926 | Pt | 0 | 0 | 0.00000 |
| HETATM | 146 | Pt | 6.04472  | 5.08450  | 19.54970 | Pt | 0 | 0 | 0.00000 |
| HETATM | 147 | Pt | 15.71409 | 21.83142 | 19.54951 | Pt | 0 | 0 | 0.00000 |
| HETATM | 148 | Pt | 15.71426 | 10.66673 | 19.54912 | Pt | 0 | 0 | 0.00000 |
| HETATM | 149 | Pt | 6.04490  | 19.04003 | 19.54815 | Pt | 0 | 0 | 0.00000 |
| HETATM | 150 | Pt | 6.04506  | 7.87557  | 19.54966 | Pt | 0 | 0 | 0.00000 |
| HETATM | 151 | Pt | 15.71420 | 24.62279 | 19.54966 | Pt | 0 | 0 | 0.00000 |
| HETATM | 152 | Pt | 15.71405 | 13.45780 | 19.54985 | Pt | 0 | 0 | 0.00000 |
| HETATM | 153 | Pt | 6.04466  | 21.83145 | 19.54852 | Pt | 0 | 0 | 0.00000 |
| HETATM | 154 | Pt | 6.04482  | 10.66643 | 19.55016 | Pt | 0 | 0 | 0.00000 |
| HETATM | 155 | Pt | 15.71423 | 27.41375 | 19.54968 | Pt | 0 | 0 | 0.00000 |
| HETATM | 156 | Pt | 15.71399 | 16.24879 | 19.55013 | Pt | 0 | 0 | 0.00000 |
| HETATM | 157 | Pt | 6.04401  | 24.62280 | 19.55010 | Pt | 0 | 0 | 0.00000 |
| HETATM | 158 | Pt | 6.04420  | 13.45739 | 19.55091 | Pt | 0 | 0 | 0.00000 |
| HETATM | 159 | Pt | 15.71450 | 30.20487 | 19.54909 | Pt | 0 | 0 | 0.00000 |
| HETATM | 160 | Pt | 15.71365 | 19.04008 | 19.55057 | Pt | 0 | 0 | 0.00000 |
| HETATM | 161 | Pt | 8.46228  | 17.64485 | 19.54858 | Pt | 0 | 0 | 0.00000 |
| HETATM | 162 | Pt | 8.46208  | 6.47993  | 19.54918 | Pt | 0 | 0 | 0.00000 |
| HETATM | 163 | Pt | 18.13143 | 23.22713 | 19.54955 | Pt | 0 | 0 | 0.00000 |
| HETATM | 164 | Pt | 18.13126 | 12.06251 | 19.54986 | Pt | 0 | 0 | 0.00000 |
| HETATM | 165 | Pt | 8.46246  | 20.43553 | 19.54851 | Pt | 0 | 0 | 0.00000 |
| HETATM | 166 | Pt | 8.46210  | 9.27108  | 19.54968 | Pt | 0 | 0 | 0.00000 |
| HETATM | 167 | Pt | 18.13128 | 26.01801 | 19.55016 | Pt | 0 | 0 | 0.00000 |
| HETATM | 168 | Pt | 18.13116 | 14.85323 | 19.55013 | Pt | 0 | 0 | 0.00000 |
| HETATM | 169 | Pt | 8.46187  | 23.22634 | 19.54857 | Pt | 0 | 0 | 0.00000 |
| HETATM | 170 | Pt | 8.46164  | 12.06213 | 19.54962 | Pt | 0 | 0 | 0.00000 |
| HETATM | 171 | Pt | 18.13158 | 28.80888 | 19.54962 | Pt | 0 | 0 | 0.00000 |
| HETATM | 172 | Pt | 18.13111 | 17.64426 | 19.54963 | Pt | 0 | 0 | 0.00000 |
| HETATM | 173 | Pt | 8.46155  | 26.01803 | 19.54857 | Pt | 0 | 0 | 0.00000 |
| HETATM | 174 | Pt | 8.46177  | 14.85377 | 19.54916 | Pt | 0 | 0 | 0.00000 |
| HETATM | 175 | Pt | 18.13190 | 31.60094 | 19.54884 | Pt | 0 | 0 | 0.00000 |
| HETATM | 176 | Pt | 18.13119 | 20.43606 | 19.54947 | Pt | 0 | 0 | 0.00000 |
| HETATM | 177 | Pt | 10.88025 | 19.04012 | 19.55071 | Pt | 0 | 0 | 0.00000 |
| HETATM | 178 | Pt | 10.87929 | 7.87536  | 19.54882 | Pt | 0 | 0 | 0.00000 |
| HETATM | 179 | Pt | 1.21062  | 13.45757 | 19.55117 | Pt | 0 | 0 | 0.00000 |
| HETATM | 180 | Pt | 1.21036  | 2.29314  | 19.55133 | Pt | 0 | 0 | 0.00000 |
| HETATM | 181 | Pt | 10.88017 | 21.83065 | 19.55011 | Pt | 0 | 0 | 0.00000 |
| HETATM | 182 | Pt | 10.87914 | 10.66686 | 19.54909 | Pt | 0 | 0 | 0.00000 |
| HETATM | 183 | Pt | 1.21055  | 16.24810 | 19.55091 | Pt | 0 | 0 | 0.00000 |

|        |     |    |          |          |          |    |   |   |         |
|--------|-----|----|----------|----------|----------|----|---|---|---------|
| HETATM | 184 | Pt | 1.21057  | 5.08374  | 19.55057 | Pt | 0 | 0 | 0.00000 |
| HETATM | 185 | Pt | 10.87970 | 24.62191 | 19.54858 | Pt | 0 | 0 | 0.00000 |
| HETATM | 186 | Pt | 10.87947 | 13.45844 | 19.54884 | Pt | 0 | 0 | 0.00000 |
| HETATM | 187 | Pt | 1.21107  | 19.03997 | 19.54916 | Pt | 0 | 0 | 0.00000 |
| HETATM | 188 | Pt | 1.21075  | 7.87538  | 19.54947 | Pt | 0 | 0 | 0.00000 |
| HETATM | 189 | Pt | 10.87928 | 27.41342 | 19.54838 | Pt | 0 | 0 | 0.00000 |
| HETATM | 190 | Pt | 10.87994 | 16.24977 | 19.55002 | Pt | 0 | 0 | 0.00000 |
| HETATM | 191 | Pt | 1.21094  | 21.83217 | 19.55002 | Pt | 0 | 0 | 0.00000 |
| HETATM | 192 | Pt | 1.21073  | 10.66701 | 19.55044 | Pt | 0 | 0 | 0.00000 |
| HETATM | 193 | Pt | 2.01670  | 12.06297 | 21.83269 | Pt | 0 | 0 | 0.00000 |
| HETATM | 194 | Pt | 2.01643  | 23.22858 | 21.83242 | Pt | 0 | 0 | 0.00000 |
| HETATM | 195 | Pt | 11.68653 | 17.64555 | 21.83243 | Pt | 0 | 0 | 0.00000 |
| HETATM | 196 | Pt | 11.68497 | 28.80891 | 21.82563 | Pt | 0 | 0 | 0.00000 |
| HETATM | 197 | Pt | 2.01628  | 14.85173 | 21.83318 | Pt | 0 | 0 | 0.00000 |
| HETATM | 198 | Pt | 2.01632  | 3.68777  | 21.83279 | Pt | 0 | 0 | 0.00000 |
| HETATM | 199 | Pt | 11.68663 | 20.43462 | 21.83216 | Pt | 0 | 0 | 0.00000 |
| HETATM | 200 | Pt | 11.68477 | 9.27106  | 21.82659 | Pt | 0 | 0 | 0.00000 |
| HETATM | 201 | Pt | 2.01641  | 17.64342 | 21.82847 | Pt | 0 | 0 | 0.00000 |
| HETATM | 202 | Pt | 2.01666  | 6.47919  | 21.82851 | Pt | 0 | 0 | 0.00000 |
| HETATM | 203 | Pt | 11.68641 | 23.22610 | 21.82799 | Pt | 0 | 0 | 0.00000 |
| HETATM | 204 | Pt | 11.68493 | 12.06295 | 21.82642 | Pt | 0 | 0 | 0.00000 |
| HETATM | 205 | Pt | 2.01758  | 20.43660 | 21.82665 | Pt | 0 | 0 | 0.00000 |
| HETATM | 206 | Pt | 2.01675  | 9.27165  | 21.82847 | Pt | 0 | 0 | 0.00000 |
| HETATM | 207 | Pt | 11.68524 | 26.01756 | 21.82589 | Pt | 0 | 0 | 0.00000 |
| HETATM | 208 | Pt | 11.68604 | 14.85471 | 21.82773 | Pt | 0 | 0 | 0.00000 |
| HETATM | 209 | Pt | 4.43203  | 13.45699 | 21.83318 | Pt | 0 | 0 | 0.00000 |
| HETATM | 210 | Pt | 4.43179  | 24.62321 | 21.83216 | Pt | 0 | 0 | 0.00000 |
| HETATM | 211 | Pt | 14.10183 | 19.03989 | 21.83279 | Pt | 0 | 0 | 0.00000 |
| HETATM | 212 | Pt | 14.10288 | 30.20466 | 21.82659 | Pt | 0 | 0 | 0.00000 |
| HETATM | 213 | Pt | 4.43305  | 16.24822 | 21.82873 | Pt | 0 | 0 | 0.00000 |
| HETATM | 214 | Pt | 4.43337  | 5.08472  | 21.82907 | Pt | 0 | 0 | 0.00000 |
| HETATM | 215 | Pt | 14.10310 | 21.83160 | 21.82907 | Pt | 0 | 0 | 0.00000 |
| HETATM | 216 | Pt | 14.10275 | 10.66694 | 21.82688 | Pt | 0 | 0 | 0.00000 |
| HETATM | 217 | Pt | 4.43361  | 19.03995 | 21.82580 | Pt | 0 | 0 | 0.00000 |
| HETATM | 218 | Pt | 4.43357  | 7.87558  | 21.82773 | Pt | 0 | 0 | 0.00000 |
| HETATM | 219 | Pt | 14.10305 | 24.62344 | 21.82855 | Pt | 0 | 0 | 0.00000 |
| HETATM | 220 | Pt | 14.10285 | 13.45749 | 21.82891 | Pt | 0 | 0 | 0.00000 |
| HETATM | 221 | Pt | 4.43349  | 21.83181 | 21.82733 | Pt | 0 | 0 | 0.00000 |
| HETATM | 222 | Pt | 4.43348  | 10.66626 | 21.82949 | Pt | 0 | 0 | 0.00000 |
| HETATM | 223 | Pt | 14.10284 | 27.41399 | 21.82813 | Pt | 0 | 0 | 0.00000 |
| HETATM | 224 | Pt | 14.10306 | 16.24826 | 21.83046 | Pt | 0 | 0 | 0.00000 |
| HETATM | 225 | Pt | 6.84965  | 14.85295 | 21.82847 | Pt | 0 | 0 | 0.00000 |
| HETATM | 226 | Pt | 6.84939  | 26.01876 | 21.82798 | Pt | 0 | 0 | 0.00000 |
| HETATM | 227 | Pt | 16.51911 | 20.43590 | 21.82851 | Pt | 0 | 0 | 0.00000 |
| HETATM | 228 | Pt | 16.52065 | 31.60074 | 21.82642 | Pt | 0 | 0 | 0.00000 |
| HETATM | 229 | Pt | 6.85048  | 17.64457 | 21.82580 | Pt | 0 | 0 | 0.00000 |
| HETATM | 230 | Pt | 6.85120  | 6.48060  | 21.82855 | Pt | 0 | 0 | 0.00000 |
| HETATM | 231 | Pt | 16.51996 | 23.22720 | 21.82774 | Pt | 0 | 0 | 0.00000 |
| HETATM | 232 | Pt | 16.51940 | 12.06230 | 21.82891 | Pt | 0 | 0 | 0.00000 |
| HETATM | 233 | Pt | 6.85073  | 20.43577 | 21.82528 | Pt | 0 | 0 | 0.00000 |
| HETATM | 234 | Pt | 6.85122  | 9.27086  | 21.82940 | Pt | 0 | 0 | 0.00000 |
| HETATM | 235 | Pt | 16.51948 | 26.01859 | 21.82940 | Pt | 0 | 0 | 0.00000 |
| HETATM | 236 | Pt | 16.51957 | 14.85297 | 21.82954 | Pt | 0 | 0 | 0.00000 |
| HETATM | 237 | Pt | 6.84947  | 23.22687 | 21.82680 | Pt | 0 | 0 | 0.00000 |
| HETATM | 238 | Pt | 6.84987  | 12.06125 | 21.83011 | Pt | 0 | 0 | 0.00000 |
| HETATM | 239 | Pt | 16.51985 | 28.80916 | 21.82861 | Pt | 0 | 0 | 0.00000 |
| HETATM | 240 | Pt | 16.51904 | 17.64424 | 21.82900 | Pt | 0 | 0 | 0.00000 |
| HETATM | 241 | Pt | 9.26803  | 16.25056 | 21.82665 | Pt | 0 | 0 | 0.00000 |
| HETATM | 242 | Pt | 9.26745  | 27.41347 | 21.82589 | Pt | 0 | 0 | 0.00000 |
| HETATM | 243 | Pt | 18.93739 | 21.83221 | 21.82847 | Pt | 0 | 0 | 0.00000 |
| HETATM | 244 | Pt | 18.93783 | 32.99759 | 21.82773 | Pt | 0 | 0 | 0.00000 |
| HETATM | 245 | Pt | 9.26836  | 19.04039 | 21.82733 | Pt | 0 | 0 | 0.00000 |
| HETATM | 246 | Pt | 9.26800  | 7.87569  | 21.82812 | Pt | 0 | 0 | 0.00000 |

|        |     |    |          |          |          |    |   |   |         |
|--------|-----|----|----------|----------|----------|----|---|---|---------|
| HETATM | 247 | Pt | 18.93680 | 24.62247 | 21.82949 | Pt | 0 | 0 | 0.00000 |
| HETATM | 248 | Pt | 18.93617 | 13.45787 | 21.83046 | Pt | 0 | 0 | 0.00000 |
| HETATM | 249 | Pt | 9.26853  | 21.83023 | 21.82680 | Pt | 0 | 0 | 0.00000 |
| HETATM | 250 | Pt | 9.26774  | 10.66647 | 21.82861 | Pt | 0 | 0 | 0.00000 |
| HETATM | 251 | Pt | 18.93670 | 27.41261 | 21.83011 | Pt | 0 | 0 | 0.00000 |
| HETATM | 252 | Pt | 18.93713 | 16.24815 | 21.82899 | Pt | 0 | 0 | 0.00000 |
| HETATM | 253 | Pt | 9.26756  | 24.62183 | 21.82414 | Pt | 0 | 0 | 0.00000 |
| HETATM | 254 | Pt | 9.26768  | 13.45791 | 21.82572 | Pt | 0 | 0 | 0.00000 |
| HETATM | 255 | Pt | 18.93734 | 30.20483 | 21.82572 | Pt | 0 | 0 | 0.00000 |
| HETATM | 256 | Pt | 18.93704 | 19.04017 | 21.82609 | Pt | 0 | 0 | 0.00000 |
| HETATM | 257 | Pt | 2.82157  | 13.45705 | 24.12268 | Pt | 0 | 0 | 0.00000 |
| HETATM | 258 | Pt | 2.82160  | 2.29350  | 24.12178 | Pt | 0 | 0 | 0.00000 |
| HETATM | 259 | Pt | 12.49172 | 19.04015 | 24.12178 | Pt | 0 | 0 | 0.00000 |
| HETATM | 260 | Pt | 12.49066 | 7.87470  | 24.10222 | Pt | 0 | 0 | 0.00000 |
| HETATM | 261 | Pt | 2.82302  | 16.24628 | 24.11032 | Pt | 0 | 0 | 0.00000 |
| HETATM | 262 | Pt | 2.82372  | 5.08244  | 24.11033 | Pt | 0 | 0 | 0.00000 |
| HETATM | 263 | Pt | 12.49365 | 21.82984 | 24.10995 | Pt | 0 | 0 | 0.00000 |
| HETATM | 264 | Pt | 12.49076 | 10.66671 | 24.10260 | Pt | 0 | 0 | 0.00000 |
| HETATM | 265 | Pt | 2.82172  | 19.03990 | 24.10334 | Pt | 0 | 0 | 0.00000 |
| HETATM | 266 | Pt | 2.82091  | 7.87544  | 24.10555 | Pt | 0 | 0 | 0.00000 |
| HETATM | 267 | Pt | 12.49071 | 24.62336 | 24.10556 | Pt | 0 | 0 | 0.00000 |
| HETATM | 268 | Pt | 12.49005 | 13.45840 | 24.10476 | Pt | 0 | 0 | 0.00000 |
| HETATM | 269 | Pt | 2.82476  | 21.83409 | 24.10825 | Pt | 0 | 0 | 0.00000 |
| HETATM | 270 | Pt | 2.82392  | 10.66834 | 24.11046 | Pt | 0 | 0 | 0.00000 |
| HETATM | 271 | Pt | 12.49052 | 27.41327 | 24.10337 | Pt | 0 | 0 | 0.00000 |
| HETATM | 272 | Pt | 12.49344 | 16.25038 | 24.11124 | Pt | 0 | 0 | 0.00000 |
| HETATM | 273 | Pt | 5.23638  | 14.85293 | 24.11032 | Pt | 0 | 0 | 0.00000 |
| HETATM | 274 | Pt | 5.23656  | 3.69002  | 24.10996 | Pt | 0 | 0 | 0.00000 |
| HETATM | 275 | Pt | 14.90596 | 20.43646 | 24.11033 | Pt | 0 | 0 | 0.00000 |
| HETATM | 276 | Pt | 14.90855 | 9.27080  | 24.10260 | Pt | 0 | 0 | 0.00000 |
| HETATM | 277 | Pt | 5.23938  | 17.64483 | 24.10363 | Pt | 0 | 0 | 0.00000 |
| HETATM | 278 | Pt | 5.24025  | 6.48119  | 24.10622 | Pt | 0 | 0 | 0.00000 |
| HETATM | 279 | Pt | 14.90904 | 23.22861 | 24.10622 | Pt | 0 | 0 | 0.00000 |
| HETATM | 280 | Pt | 14.90779 | 12.06131 | 24.10954 | Pt | 0 | 0 | 0.00000 |
| HETATM | 281 | Pt | 5.23995  | 20.43555 | 24.10272 | Pt | 0 | 0 | 0.00000 |
| HETATM | 282 | Pt | 5.24014  | 9.27009  | 24.10684 | Pt | 0 | 0 | 0.00000 |
| HETATM | 283 | Pt | 14.90811 | 26.02047 | 24.10994 | Pt | 0 | 0 | 0.00000 |
| HETATM | 284 | Pt | 14.90889 | 14.85078 | 24.11041 | Pt | 0 | 0 | 0.00000 |
| HETATM | 285 | Pt | 5.23651  | 23.22704 | 24.10848 | Pt | 0 | 0 | 0.00000 |
| HETATM | 286 | Pt | 5.23713  | 12.06020 | 24.11179 | Pt | 0 | 0 | 0.00000 |
| HETATM | 287 | Pt | 14.90754 | 28.80990 | 24.10851 | Pt | 0 | 0 | 0.00000 |
| HETATM | 288 | Pt | 14.90597 | 17.64318 | 24.11123 | Pt | 0 | 0 | 0.00000 |
| HETATM | 289 | Pt | 7.65638  | 16.24861 | 24.10334 | Pt | 0 | 0 | 0.00000 |
| HETATM | 290 | Pt | 7.65731  | 5.08423  | 24.10557 | Pt | 0 | 0 | 0.00000 |
| HETATM | 291 | Pt | 17.32616 | 21.83053 | 24.10555 | Pt | 0 | 0 | 0.00000 |
| HETATM | 292 | Pt | 17.32658 | 10.66603 | 24.10477 | Pt | 0 | 0 | 0.00000 |
| HETATM | 293 | Pt | 7.65593  | 19.04067 | 24.10272 | Pt | 0 | 0 | 0.00000 |
| HETATM | 294 | Pt | 7.65854  | 7.87632  | 24.10994 | Pt | 0 | 0 | 0.00000 |
| HETATM | 295 | Pt | 17.32435 | 24.62297 | 24.10684 | Pt | 0 | 0 | 0.00000 |
| HETATM | 296 | Pt | 17.32299 | 13.45699 | 24.11041 | Pt | 0 | 0 | 0.00000 |
| HETATM | 297 | Pt | 7.65705  | 21.83236 | 24.10263 | Pt | 0 | 0 | 0.00000 |
| HETATM | 298 | Pt | 7.65856  | 10.66553 | 24.11028 | Pt | 0 | 0 | 0.00000 |
| HETATM | 299 | Pt | 17.32362 | 27.41510 | 24.11028 | Pt | 0 | 0 | 0.00000 |
| HETATM | 300 | Pt | 17.32592 | 16.24964 | 24.10685 | Pt | 0 | 0 | 0.00000 |
| HETATM | 301 | Pt | 7.65743  | 24.62238 | 24.10123 | Pt | 0 | 0 | 0.00000 |
| HETATM | 302 | Pt | 7.65861  | 13.45661 | 24.10453 | Pt | 0 | 0 | 0.00000 |
| HETATM | 303 | Pt | 17.32554 | 30.20501 | 24.10492 | Pt | 0 | 0 | 0.00000 |
| HETATM | 304 | Pt | 17.32692 | 19.04009 | 24.10408 | Pt | 0 | 0 | 0.00000 |
| HETATM | 305 | Pt | 10.07470 | 17.64833 | 24.10824 | Pt | 0 | 0 | 0.00000 |
| HETATM | 306 | Pt | 10.07352 | 6.47902  | 24.10337 | Pt | 0 | 0 | 0.00000 |
| HETATM | 307 | Pt | 0.40529  | 12.06473 | 24.11046 | Pt | 0 | 0 | 0.00000 |
| HETATM | 308 | Pt | 0.40473  | 0.90010  | 24.11125 | Pt | 0 | 0 | 0.00000 |
| HETATM | 309 | Pt | 10.07516 | 20.43345 | 24.10848 | Pt | 0 | 0 | 0.00000 |

|        |     |    |          |          |          |    |   |   |         |
|--------|-----|----|----------|----------|----------|----|---|---|---------|
| HETATM | 310 | Pt | 10.07454 | 9.27054  | 24.10851 | Pt | 0 | 0 | 0.00000 |
| HETATM | 311 | Pt | 0.40407  | 14.85056 | 24.11178 | Pt | 0 | 0 | 0.00000 |
| HETATM | 312 | Pt | 0.40466  | 3.68581  | 24.11123 | Pt | 0 | 0 | 0.00000 |
| HETATM | 313 | Pt | 10.07310 | 23.22769 | 24.10123 | Pt | 0 | 0 | 0.00000 |
| HETATM | 314 | Pt | 10.07374 | 12.06213 | 24.10492 | Pt | 0 | 0 | 0.00000 |
| HETATM | 315 | Pt | 0.40266  | 17.64583 | 24.10454 | Pt | 0 | 0 | 0.00000 |
| HETATM | 316 | Pt | 0.40394  | 6.48088  | 24.10408 | Pt | 0 | 0 | 0.00000 |
| HETATM | 317 | Pt | 10.07261 | 26.01623 | 24.10101 | Pt | 0 | 0 | 0.00000 |
| HETATM | 318 | Pt | 10.07189 | 14.85428 | 24.09991 | Pt | 0 | 0 | 0.00000 |
| HETATM | 319 | Pt | 0.40644  | 20.43462 | 24.09991 | Pt | 0 | 0 | 0.00000 |
| HETATM | 320 | Pt | 0.40401  | 9.26972  | 24.10381 | Pt | 0 | 0 | 0.00000 |
| HETATM | 321 | Pt | 3.62610  | 14.85054 | 26.41126 | Pt | 0 | 0 | 0.00000 |
| HETATM | 322 | Pt | 3.62736  | 3.68751  | 26.41089 | Pt | 0 | 0 | 0.00000 |
| HETATM | 323 | Pt | 13.29608 | 20.43496 | 26.41090 | Pt | 0 | 0 | 0.00000 |
| HETATM | 324 | Pt | 13.29608 | 9.26974  | 26.37785 | Pt | 0 | 0 | 0.00000 |
| HETATM | 325 | Pt | 3.62665  | 17.64647 | 26.38009 | Pt | 0 | 0 | 0.00000 |
| HETATM | 326 | Pt | 3.62696  | 6.48268  | 26.38201 | Pt | 0 | 0 | 0.00000 |
| HETATM | 327 | Pt | 13.29476 | 23.23214 | 26.38187 | Pt | 0 | 0 | 0.00000 |
| HETATM | 328 | Pt | 13.28915 | 12.06014 | 26.38360 | Pt | 0 | 0 | 0.00000 |
| HETATM | 329 | Pt | 3.62802  | 20.43365 | 26.37885 | Pt | 0 | 0 | 0.00000 |
| HETATM | 330 | Pt | 3.62703  | 9.26816  | 26.38233 | Pt | 0 | 0 | 0.00000 |
| HETATM | 331 | Pt | 13.29467 | 26.02115 | 26.38688 | Pt | 0 | 0 | 0.00000 |
| HETATM | 332 | Pt | 13.29365 | 14.84811 | 26.38654 | Pt | 0 | 0 | 0.00000 |
| HETATM | 333 | Pt | 3.62791  | 23.23002 | 26.40971 | Pt | 0 | 0 | 0.00000 |
| HETATM | 334 | Pt | 3.62748  | 12.06293 | 26.41206 | Pt | 0 | 0 | 0.00000 |
| HETATM | 335 | Pt | 13.28888 | 28.80935 | 26.38291 | Pt | 0 | 0 | 0.00000 |
| HETATM | 336 | Pt | 13.29559 | 17.64659 | 26.41136 | Pt | 0 | 0 | 0.00000 |
| HETATM | 337 | Pt | 6.04717  | 16.24898 | 26.38009 | Pt | 0 | 0 | 0.00000 |
| HETATM | 338 | Pt | 6.05045  | 5.08494  | 26.38186 | Pt | 0 | 0 | 0.00000 |
| HETATM | 339 | Pt | 15.71697 | 21.83221 | 26.38201 | Pt | 0 | 0 | 0.00000 |
| HETATM | 340 | Pt | 15.71610 | 10.65894 | 26.38360 | Pt | 0 | 0 | 0.00000 |
| HETATM | 341 | Pt | 6.04532  | 19.04075 | 26.38076 | Pt | 0 | 0 | 0.00000 |
| HETATM | 342 | Pt | 6.04801  | 7.87563  | 26.38639 | Pt | 0 | 0 | 0.00000 |
| HETATM | 343 | Pt | 15.71279 | 24.62537 | 26.38639 | Pt | 0 | 0 | 0.00000 |
| HETATM | 344 | Pt | 15.71050 | 13.45164 | 26.39808 | Pt | 0 | 0 | 0.00000 |
| HETATM | 345 | Pt | 6.04857  | 21.83223 | 26.37886 | Pt | 0 | 0 | 0.00000 |
| HETATM | 346 | Pt | 6.05227  | 10.66436 | 26.38507 | Pt | 0 | 0 | 0.00000 |
| HETATM | 347 | Pt | 15.70830 | 27.42058 | 26.39721 | Pt | 0 | 0 | 0.00000 |
| HETATM | 348 | Pt | 15.71674 | 16.24731 | 26.38447 | Pt | 0 | 0 | 0.00000 |
| HETATM | 349 | Pt | 6.05692  | 24.62317 | 26.37203 | Pt | 0 | 0 | 0.00000 |
| HETATM | 350 | Pt | 6.05742  | 13.45644 | 26.37418 | Pt | 0 | 0 | 0.00000 |
| HETATM | 351 | Pt | 15.71546 | 30.21034 | 26.38343 | Pt | 0 | 0 | 0.00000 |
| HETATM | 352 | Pt | 15.72539 | 19.04000 | 26.37420 | Pt | 0 | 0 | 0.00000 |
| HETATM | 353 | Pt | 8.46025  | 17.64375 | 26.37886 | Pt | 0 | 0 | 0.00000 |
| HETATM | 354 | Pt | 8.46584  | 6.47937  | 26.38687 | Pt | 0 | 0 | 0.00000 |
| HETATM | 355 | Pt | 18.12924 | 23.22500 | 26.38233 | Pt | 0 | 0 | 0.00000 |
| HETATM | 356 | Pt | 18.12831 | 12.05682 | 26.38654 | Pt | 0 | 0 | 0.00000 |
| HETATM | 357 | Pt | 8.46118  | 20.43931 | 26.37886 | Pt | 0 | 0 | 0.00000 |
| HETATM | 358 | Pt | 8.47097  | 9.26935  | 26.39721 | Pt | 0 | 0 | 0.00000 |
| HETATM | 359 | Pt | 18.12576 | 26.02342 | 26.38507 | Pt | 0 | 0 | 0.00000 |
| HETATM | 360 | Pt | 18.12851 | 14.85488 | 26.38447 | Pt | 0 | 0 | 0.00000 |
| HETATM | 361 | Pt | 8.46190  | 23.22638 | 26.38500 | Pt | 0 | 0 | 0.00000 |
| HETATM | 362 | Pt | 8.46624  | 12.06060 | 26.39052 | Pt | 0 | 0 | 0.00000 |
| HETATM | 363 | Pt | 18.12796 | 28.81211 | 26.39051 | Pt | 0 | 0 | 0.00000 |
| HETATM | 364 | Pt | 18.13129 | 17.64457 | 26.38891 | Pt | 0 | 0 | 0.00000 |
| HETATM | 365 | Pt | 8.46254  | 26.01648 | 26.38298 | Pt | 0 | 0 | 0.00000 |
| HETATM | 366 | Pt | 8.45984  | 14.85599 | 26.38553 | Pt | 0 | 0 | 0.00000 |
| HETATM | 367 | Pt | 18.13997 | 31.59871 | 26.37759 | Pt | 0 | 0 | 0.00000 |
| HETATM | 368 | Pt | 18.13131 | 20.43573 | 26.38842 | Pt | 0 | 0 | 0.00000 |
| HETATM | 369 | Pt | 10.88204 | 19.04185 | 26.40973 | Pt | 0 | 0 | 0.00000 |
| HETATM | 370 | Pt | 10.88340 | 7.86846  | 26.38291 | Pt | 0 | 0 | 0.00000 |
| HETATM | 371 | Pt | 1.21126  | 13.45793 | 26.41206 | Pt | 0 | 0 | 0.00000 |
| HETATM | 372 | Pt | 1.21280  | 2.29289  | 26.41135 | Pt | 0 | 0 | 0.00000 |

|        |     |    |          |          |          |    |   |   |         |
|--------|-----|----|----------|----------|----------|----|---|---|---------|
| HETATM | 373 | Pt | 10.87403 | 21.84201 | 26.37203 | Pt | 0 | 0 | 0.00000 |
| HETATM | 374 | Pt | 10.88340 | 10.67044 | 26.38343 | Pt | 0 | 0 | 0.00000 |
| HETATM | 375 | Pt | 1.20312  | 16.25908 | 26.37418 | Pt | 0 | 0 | 0.00000 |
| HETATM | 376 | Pt | 1.20463  | 5.09386  | 26.37420 | Pt | 0 | 0 | 0.00000 |
| HETATM | 377 | Pt | 10.87787 | 24.62199 | 26.38298 | Pt | 0 | 0 | 0.00000 |
| HETATM | 378 | Pt | 10.87350 | 13.46431 | 26.37759 | Pt | 0 | 0 | 0.00000 |
| HETATM | 379 | Pt | 1.21395  | 19.03940 | 26.38553 | Pt | 0 | 0 | 0.00000 |
| HETATM | 380 | Pt | 1.21041  | 7.87532  | 26.38842 | Pt | 0 | 0 | 0.00000 |
| HETATM | 381 | Pt | 10.87448 | 27.40509 | 26.37372 | Pt | 0 | 0 | 0.00000 |
| HETATM | 382 | Pt | 10.87238 | 16.24220 | 26.37134 | Pt | 0 | 0 | 0.00000 |
| HETATM | 383 | Pt | 1.20817  | 21.82183 | 26.37133 | Pt | 0 | 0 | 0.00000 |
| HETATM | 384 | Pt | 1.20472  | 10.65659 | 26.37368 | Pt | 0 | 0 | 0.00000 |
| HETATM | 385 | Pt | 2.01991  | 12.06854 | 28.74581 | Pt | 0 | 0 | 0.00000 |
| HETATM | 386 | Pt | 2.02463  | 23.23530 | 28.74531 | Pt | 0 | 0 | 0.00000 |
| HETATM | 387 | Pt | 11.68825 | 17.65601 | 28.74527 | Pt | 0 | 0 | 0.00000 |
| HETATM | 388 | Pt | 11.66880 | 28.78091 | 28.64045 | Pt | 0 | 0 | 0.00000 |
| HETATM | 389 | Pt | 2.02012  | 14.84486 | 28.74640 | Pt | 0 | 0 | 0.00000 |
| HETATM | 390 | Pt | 2.02277  | 3.68249  | 28.74650 | Pt | 0 | 0 | 0.00000 |
| HETATM | 391 | Pt | 11.68962 | 20.43155 | 28.74503 | Pt | 0 | 0 | 0.00000 |
| HETATM | 392 | Pt | 11.66662 | 9.26779  | 28.73538 | Pt | 0 | 0 | 0.00000 |
| HETATM | 393 | Pt | 2.02615  | 17.65421 | 28.68132 | Pt | 0 | 0 | 0.00000 |
| HETATM | 394 | Pt | 2.02388  | 6.49182  | 28.68222 | Pt | 0 | 0 | 0.00000 |
| HETATM | 395 | Pt | 11.68933 | 23.24116 | 28.68032 | Pt | 0 | 0 | 0.00000 |
| HETATM | 396 | Pt | 11.66695 | 12.08446 | 28.64179 | Pt | 0 | 0 | 0.00000 |
| HETATM | 397 | Pt | 2.02848  | 20.42426 | 28.67966 | Pt | 0 | 0 | 0.00000 |
| HETATM | 398 | Pt | 2.02355  | 9.25957  | 28.68223 | Pt | 0 | 0 | 0.00000 |
| HETATM | 399 | Pt | 11.67776 | 26.01117 | 28.66424 | Pt | 0 | 0 | 0.00000 |
| HETATM | 400 | Pt | 11.68358 | 14.84918 | 28.67976 | Pt | 0 | 0 | 0.00000 |
| HETATM | 401 | Pt | 4.42417  | 13.45688 | 28.74640 | Pt | 0 | 0 | 0.00000 |
| HETATM | 402 | Pt | 4.42765  | 24.62427 | 28.74506 | Pt | 0 | 0 | 0.00000 |
| HETATM | 403 | Pt | 14.09403 | 19.04284 | 28.74647 | Pt | 0 | 0 | 0.00000 |
| HETATM | 404 | Pt | 14.10912 | 30.18731 | 28.73538 | Pt | 0 | 0 | 0.00000 |
| HETATM | 405 | Pt | 4.44749  | 16.27322 | 28.64808 | Pt | 0 | 0 | 0.00000 |
| HETATM | 406 | Pt | 4.45093  | 5.10962  | 28.64867 | Pt | 0 | 0 | 0.00000 |
| HETATM | 407 | Pt | 14.11589 | 21.85925 | 28.64867 | Pt | 0 | 0 | 0.00000 |
| HETATM | 408 | Pt | 14.10834 | 10.67661 | 28.73481 | Pt | 0 | 0 | 0.00000 |
| HETATM | 409 | Pt | 4.43902  | 19.04023 | 28.66250 | Pt | 0 | 0 | 0.00000 |
| HETATM | 410 | Pt | 4.44154  | 7.87515  | 28.66592 | Pt | 0 | 0 | 0.00000 |
| HETATM | 411 | Pt | 14.10075 | 24.62722 | 28.66714 | Pt | 0 | 0 | 0.00000 |
| HETATM | 412 | Pt | 14.09363 | 13.46882 | 28.69026 | Pt | 0 | 0 | 0.00000 |
| HETATM | 413 | Pt | 4.44974  | 21.80750 | 28.64650 | Pt | 0 | 0 | 0.00000 |
| HETATM | 414 | Pt | 4.45099  | 10.63998 | 28.65006 | Pt | 0 | 0 | 0.00000 |
| HETATM | 415 | Pt | 14.09068 | 27.39431 | 28.69033 | Pt | 0 | 0 | 0.00000 |
| HETATM | 416 | Pt | 14.11549 | 16.22882 | 28.65058 | Pt | 0 | 0 | 0.00000 |
| HETATM | 417 | Pt | 6.85412  | 14.86678 | 28.68132 | Pt | 0 | 0 | 0.00000 |
| HETATM | 418 | Pt | 6.86097  | 26.02881 | 28.68032 | Pt | 0 | 0 | 0.00000 |
| HETATM | 419 | Pt | 16.52644 | 20.44847 | 28.68223 | Pt | 0 | 0 | 0.00000 |
| HETATM | 420 | Pt | 16.54827 | 31.59593 | 28.64179 | Pt | 0 | 0 | 0.00000 |
| HETATM | 421 | Pt | 6.84802  | 17.64939 | 28.66250 | Pt | 0 | 0 | 0.00000 |
| HETATM | 422 | Pt | 6.85562  | 6.48049  | 28.66714 | Pt | 0 | 0 | 0.00000 |
| HETATM | 423 | Pt | 16.51560 | 23.23389 | 28.66592 | Pt | 0 | 0 | 0.00000 |
| HETATM | 424 | Pt | 16.53381 | 12.05998 | 28.69026 | Pt | 0 | 0 | 0.00000 |
| HETATM | 425 | Pt | 6.84931  | 20.43330 | 28.66212 | Pt | 0 | 0 | 0.00000 |
| HETATM | 426 | Pt | 6.85915  | 9.26456  | 28.67128 | Pt | 0 | 0 | 0.00000 |
| HETATM | 427 | Pt | 16.51007 | 26.02231 | 28.67128 | Pt | 0 | 0 | 0.00000 |
| HETATM | 428 | Pt | 16.51713 | 14.84876 | 28.67079 | Pt | 0 | 0 | 0.00000 |
| HETATM | 429 | Pt | 6.85746  | 23.21587 | 28.67992 | Pt | 0 | 0 | 0.00000 |
| HETATM | 430 | Pt | 6.85629  | 12.05234 | 28.68376 | Pt | 0 | 0 | 0.00000 |
| HETATM | 431 | Pt | 16.53871 | 28.80706 | 28.69131 | Pt | 0 | 0 | 0.00000 |
| HETATM | 432 | Pt | 16.52706 | 17.63449 | 28.68304 | Pt | 0 | 0 | 0.00000 |
| HETATM | 433 | Pt | 9.25189  | 16.25382 | 28.67966 | Pt | 0 | 0 | 0.00000 |
| HETATM | 434 | Pt | 9.26566  | 27.40379 | 28.66424 | Pt | 0 | 0 | 0.00000 |
| HETATM | 435 | Pt | 18.92354 | 21.83206 | 28.68223 | Pt | 0 | 0 | 0.00000 |

|                      |     |    |          |          |          |    |   |   |         |
|----------------------|-----|----|----------|----------|----------|----|---|---|---------|
| HETATM               | 436 | Pt | 18.93427 | 32.99270 | 28.67976 | Pt | 0 | 0 | 0.00000 |
| HETATM               | 437 | Pt | 9.23918  | 19.04232 | 28.64650 | Pt | 0 | 0 | 0.00000 |
| HETATM               | 438 | Pt | 9.25703  | 7.85532  | 28.69032 | Pt | 0 | 0 | 0.00000 |
| HETATM               | 439 | Pt | 18.90529 | 24.62449 | 28.65006 | Pt | 0 | 0 | 0.00000 |
| HETATM               | 440 | Pt | 18.91313 | 13.45891 | 28.65058 | Pt | 0 | 0 | 0.00000 |
| HETATM               | 441 | Pt | 9.25500  | 21.83165 | 28.67992 | Pt | 0 | 0 | 0.00000 |
| HETATM               | 442 | Pt | 9.25650  | 10.68175 | 28.69131 | Pt | 0 | 0 | 0.00000 |
| HETATM               | 443 | Pt | 18.92578 | 27.41372 | 28.68377 | Pt | 0 | 0 | 0.00000 |
| HETATM               | 444 | Pt | 18.92469 | 16.25023 | 28.68304 | Pt | 0 | 0 | 0.00000 |
| HETATM               | 445 | Pt | 9.26551  | 24.61829 | 28.66573 | Pt | 0 | 0 | 0.00000 |
| HETATM               | 446 | Pt | 9.25981  | 13.46851 | 28.66691 | Pt | 0 | 0 | 0.00000 |
| HETATM               | 447 | Pt | 18.95046 | 30.20331 | 28.66691 | Pt | 0 | 0 | 0.00000 |
| HETATM               | 448 | Pt | 18.93756 | 19.04106 | 28.67008 | Pt | 0 | 0 | 0.00000 |
| HETATM               | 449 | O  | 2.82142  | 13.45680 | 29.86550 | O  | 0 | 0 | 0.00000 |
| HETATM               | 450 | O  | 2.82557  | 2.29333  | 29.86491 | O  | 0 | 0 | 0.00000 |
| HETATM               | 451 | O  | 12.48959 | 19.04351 | 29.86501 | O  | 0 | 0 | 0.00000 |
| HETATM               | 452 | O  | 13.29474 | 9.26741  | 29.84437 | O  | 0 | 0 | 0.00000 |
| UNIT ENERGY kcal     |     |    |          |          |          |    |   |   |         |
| ENERGY -57862.057661 |     |    |          |          |          |    |   |   |         |
| END                  |     |    |          |          |          |    |   |   |         |

XTLGRF 200

DESCRP TS

REMARK Pt111\_0.06ML\_8x8x7\_30.0\_vac fcc-displacement

FIXATOMS 1 128

CRYSTX 22.32970 22.32970 43.67409 90.00000 90.00000 60.00000

FORMAT ATOM (a6,1x,i5,1x,a5,1x,a3,1x,a1,1x,a5,3f10.5,1x,a5,i3,i2,1x,f8.5)

|        |    |    |          |          |          |    |   |   |         |
|--------|----|----|----------|----------|----------|----|---|---|---------|
| HETATM | 1  | Pt | 2.01629  | 12.06204 | 14.99189 | Pt | 0 | 0 | 0.00000 |
| HETATM | 2  | Pt | 2.01629  | 23.22689 | 14.99189 | Pt | 0 | 0 | 0.00000 |
| HETATM | 3  | Pt | 11.68533 | 17.64447 | 14.99189 | Pt | 0 | 0 | 0.00000 |
| HETATM | 4  | Pt | 11.68533 | 28.80932 | 14.99189 | Pt | 0 | 0 | 0.00000 |
| HETATM | 5  | Pt | 2.01629  | 14.85325 | 14.99189 | Pt | 0 | 0 | 0.00000 |
| HETATM | 6  | Pt | 2.01629  | 3.68840  | 14.99189 | Pt | 0 | 0 | 0.00000 |
| HETATM | 7  | Pt | 11.68533 | 20.43568 | 14.99189 | Pt | 0 | 0 | 0.00000 |
| HETATM | 8  | Pt | 11.68533 | 9.27083  | 14.99189 | Pt | 0 | 0 | 0.00000 |
| HETATM | 9  | Pt | 2.01629  | 17.64446 | 14.99189 | Pt | 0 | 0 | 0.00000 |
| HETATM | 10 | Pt | 2.01629  | 6.47961  | 14.99189 | Pt | 0 | 0 | 0.00000 |
| HETATM | 11 | Pt | 11.68533 | 23.22688 | 14.99189 | Pt | 0 | 0 | 0.00000 |
| HETATM | 12 | Pt | 11.68533 | 12.06204 | 14.99189 | Pt | 0 | 0 | 0.00000 |
| HETATM | 13 | Pt | 2.01629  | 20.43568 | 14.99189 | Pt | 0 | 0 | 0.00000 |
| HETATM | 14 | Pt | 2.01629  | 9.27083  | 14.99189 | Pt | 0 | 0 | 0.00000 |
| HETATM | 15 | Pt | 11.68533 | 26.01811 | 14.99189 | Pt | 0 | 0 | 0.00000 |
| HETATM | 16 | Pt | 11.68533 | 14.85326 | 14.99189 | Pt | 0 | 0 | 0.00000 |
| HETATM | 17 | Pt | 4.43355  | 13.45765 | 14.99189 | Pt | 0 | 0 | 0.00000 |
| HETATM | 18 | Pt | 4.43355  | 24.62250 | 14.99189 | Pt | 0 | 0 | 0.00000 |
| HETATM | 19 | Pt | 14.10259 | 19.04008 | 14.99189 | Pt | 0 | 0 | 0.00000 |
| HETATM | 20 | Pt | 14.10259 | 30.20492 | 14.99189 | Pt | 0 | 0 | 0.00000 |
| HETATM | 21 | Pt | 4.43355  | 16.24886 | 14.99189 | Pt | 0 | 0 | 0.00000 |
| HETATM | 22 | Pt | 4.43355  | 5.08401  | 14.99189 | Pt | 0 | 0 | 0.00000 |
| HETATM | 23 | Pt | 14.10259 | 21.83129 | 14.99189 | Pt | 0 | 0 | 0.00000 |
| HETATM | 24 | Pt | 14.10259 | 10.66643 | 14.99189 | Pt | 0 | 0 | 0.00000 |
| HETATM | 25 | Pt | 4.43355  | 19.04007 | 14.99189 | Pt | 0 | 0 | 0.00000 |
| HETATM | 26 | Pt | 4.43355  | 7.87522  | 14.99189 | Pt | 0 | 0 | 0.00000 |
| HETATM | 27 | Pt | 14.10259 | 24.62250 | 14.99189 | Pt | 0 | 0 | 0.00000 |
| HETATM | 28 | Pt | 14.10259 | 13.45764 | 14.99189 | Pt | 0 | 0 | 0.00000 |
| HETATM | 29 | Pt | 4.43355  | 21.83128 | 14.99189 | Pt | 0 | 0 | 0.00000 |
| HETATM | 30 | Pt | 4.43355  | 10.66643 | 14.99189 | Pt | 0 | 0 | 0.00000 |
| HETATM | 31 | Pt | 14.10259 | 27.41371 | 14.99189 | Pt | 0 | 0 | 0.00000 |
| HETATM | 32 | Pt | 14.10259 | 16.24885 | 14.99189 | Pt | 0 | 0 | 0.00000 |
| HETATM | 33 | Pt | 6.85081  | 14.85325 | 14.99189 | Pt | 0 | 0 | 0.00000 |
| HETATM | 34 | Pt | 6.85081  | 26.01810 | 14.99189 | Pt | 0 | 0 | 0.00000 |
| HETATM | 35 | Pt | 16.51985 | 20.43568 | 14.99189 | Pt | 0 | 0 | 0.00000 |
| HETATM | 36 | Pt | 16.51985 | 31.60053 | 14.99189 | Pt | 0 | 0 | 0.00000 |



|        |    |    |          |          |          |    |   |   |         |
|--------|----|----|----------|----------|----------|----|---|---|---------|
| HETATM | 37 | Pt | 6.85081  | 17.64446 | 14.99189 | Pt | 0 | 0 | 0.00000 |
| HETATM | 38 | Pt | 6.85081  | 6.47961  | 14.99189 | Pt | 0 | 0 | 0.00000 |
| HETATM | 39 | Pt | 16.51985 | 23.22688 | 14.99189 | Pt | 0 | 0 | 0.00000 |
| HETATM | 40 | Pt | 16.51985 | 12.06204 | 14.99189 | Pt | 0 | 0 | 0.00000 |
| HETATM | 41 | Pt | 6.85081  | 20.43568 | 14.99189 | Pt | 0 | 0 | 0.00000 |
| HETATM | 42 | Pt | 6.85081  | 9.27083  | 14.99189 | Pt | 0 | 0 | 0.00000 |
| HETATM | 43 | Pt | 16.51985 | 26.01811 | 14.99189 | Pt | 0 | 0 | 0.00000 |
| HETATM | 44 | Pt | 16.51985 | 14.85326 | 14.99189 | Pt | 0 | 0 | 0.00000 |
| HETATM | 45 | Pt | 6.85081  | 23.22689 | 14.99189 | Pt | 0 | 0 | 0.00000 |
| HETATM | 46 | Pt | 6.85081  | 12.06204 | 14.99189 | Pt | 0 | 0 | 0.00000 |
| HETATM | 47 | Pt | 16.51985 | 28.80932 | 14.99189 | Pt | 0 | 0 | 0.00000 |
| HETATM | 48 | Pt | 16.51985 | 17.64447 | 14.99189 | Pt | 0 | 0 | 0.00000 |
| HETATM | 49 | Pt | 9.26807  | 16.24886 | 14.99189 | Pt | 0 | 0 | 0.00000 |
| HETATM | 50 | Pt | 9.26807  | 27.41371 | 14.99189 | Pt | 0 | 0 | 0.00000 |
| HETATM | 51 | Pt | 18.93711 | 21.83129 | 14.99189 | Pt | 0 | 0 | 0.00000 |
| HETATM | 52 | Pt | 18.93711 | 32.99613 | 14.99189 | Pt | 0 | 0 | 0.00000 |
| HETATM | 53 | Pt | 9.26807  | 19.04007 | 14.99189 | Pt | 0 | 0 | 0.00000 |
| HETATM | 54 | Pt | 9.26807  | 7.87522  | 14.99189 | Pt | 0 | 0 | 0.00000 |
| HETATM | 55 | Pt | 18.93711 | 24.62250 | 14.99189 | Pt | 0 | 0 | 0.00000 |
| HETATM | 56 | Pt | 18.93711 | 13.45764 | 14.99189 | Pt | 0 | 0 | 0.00000 |
| HETATM | 57 | Pt | 9.26807  | 21.83128 | 14.99189 | Pt | 0 | 0 | 0.00000 |
| HETATM | 58 | Pt | 9.26807  | 10.66643 | 14.99189 | Pt | 0 | 0 | 0.00000 |
| HETATM | 59 | Pt | 18.93711 | 27.41371 | 14.99189 | Pt | 0 | 0 | 0.00000 |
| HETATM | 60 | Pt | 18.93711 | 16.24885 | 14.99189 | Pt | 0 | 0 | 0.00000 |
| HETATM | 61 | Pt | 9.26807  | 24.62249 | 14.99189 | Pt | 0 | 0 | 0.00000 |
| HETATM | 62 | Pt | 9.26807  | 13.45764 | 14.99189 | Pt | 0 | 0 | 0.00000 |
| HETATM | 63 | Pt | 18.93711 | 30.20492 | 14.99189 | Pt | 0 | 0 | 0.00000 |
| HETATM | 64 | Pt | 18.93711 | 19.04006 | 14.99189 | Pt | 0 | 0 | 0.00000 |
| HETATM | 65 | Pt | 2.82204  | 13.45765 | 17.27092 | Pt | 0 | 0 | 0.00000 |
| HETATM | 66 | Pt | 2.82204  | 2.29280  | 17.27092 | Pt | 0 | 0 | 0.00000 |
| HETATM | 67 | Pt | 12.49108 | 19.04008 | 17.27092 | Pt | 0 | 0 | 0.00000 |
| HETATM | 68 | Pt | 12.49108 | 7.87522  | 17.27092 | Pt | 0 | 0 | 0.00000 |
| HETATM | 69 | Pt | 2.82204  | 16.24886 | 17.27092 | Pt | 0 | 0 | 0.00000 |
| HETATM | 70 | Pt | 2.82204  | 5.08401  | 17.27092 | Pt | 0 | 0 | 0.00000 |
| HETATM | 71 | Pt | 12.49108 | 21.83129 | 17.27092 | Pt | 0 | 0 | 0.00000 |
| HETATM | 72 | Pt | 12.49108 | 10.66643 | 17.27092 | Pt | 0 | 0 | 0.00000 |
| HETATM | 73 | Pt | 2.82204  | 19.04007 | 17.27092 | Pt | 0 | 0 | 0.00000 |
| HETATM | 74 | Pt | 2.82204  | 7.87522  | 17.27092 | Pt | 0 | 0 | 0.00000 |
| HETATM | 75 | Pt | 12.49108 | 24.62250 | 17.27092 | Pt | 0 | 0 | 0.00000 |
| HETATM | 76 | Pt | 12.49108 | 13.45764 | 17.27092 | Pt | 0 | 0 | 0.00000 |
| HETATM | 77 | Pt | 2.82204  | 21.83128 | 17.27092 | Pt | 0 | 0 | 0.00000 |
| HETATM | 78 | Pt | 2.82204  | 10.66643 | 17.27092 | Pt | 0 | 0 | 0.00000 |
| HETATM | 79 | Pt | 12.49108 | 27.41371 | 17.27092 | Pt | 0 | 0 | 0.00000 |
| HETATM | 80 | Pt | 12.49108 | 16.24885 | 17.27092 | Pt | 0 | 0 | 0.00000 |
| HETATM | 81 | Pt | 5.23930  | 14.85325 | 17.27092 | Pt | 0 | 0 | 0.00000 |
| HETATM | 82 | Pt | 5.23930  | 3.68840  | 17.27092 | Pt | 0 | 0 | 0.00000 |
| HETATM | 83 | Pt | 14.90834 | 20.43568 | 17.27092 | Pt | 0 | 0 | 0.00000 |
| HETATM | 84 | Pt | 14.90834 | 9.27083  | 17.27092 | Pt | 0 | 0 | 0.00000 |
| HETATM | 85 | Pt | 5.23930  | 17.64446 | 17.27092 | Pt | 0 | 0 | 0.00000 |
| HETATM | 86 | Pt | 5.23930  | 6.47961  | 17.27092 | Pt | 0 | 0 | 0.00000 |
| HETATM | 87 | Pt | 14.90834 | 23.22688 | 17.27092 | Pt | 0 | 0 | 0.00000 |
| HETATM | 88 | Pt | 14.90834 | 12.06204 | 17.27092 | Pt | 0 | 0 | 0.00000 |
| HETATM | 89 | Pt | 5.23930  | 20.43568 | 17.27092 | Pt | 0 | 0 | 0.00000 |
| HETATM | 90 | Pt | 5.23930  | 9.27083  | 17.27092 | Pt | 0 | 0 | 0.00000 |
| HETATM | 91 | Pt | 14.90834 | 26.01811 | 17.27092 | Pt | 0 | 0 | 0.00000 |
| HETATM | 92 | Pt | 14.90834 | 14.85326 | 17.27092 | Pt | 0 | 0 | 0.00000 |
| HETATM | 93 | Pt | 5.23930  | 23.22689 | 17.27092 | Pt | 0 | 0 | 0.00000 |
| HETATM | 94 | Pt | 5.23930  | 12.06204 | 17.27092 | Pt | 0 | 0 | 0.00000 |
| HETATM | 95 | Pt | 14.90834 | 28.80932 | 17.27092 | Pt | 0 | 0 | 0.00000 |
| HETATM | 96 | Pt | 14.90834 | 17.64447 | 17.27092 | Pt | 0 | 0 | 0.00000 |
| HETATM | 97 | Pt | 7.65656  | 16.24886 | 17.27092 | Pt | 0 | 0 | 0.00000 |
| HETATM | 98 | Pt | 7.65656  | 5.08401  | 17.27092 | Pt | 0 | 0 | 0.00000 |
| HETATM | 99 | Pt | 17.32560 | 21.83129 | 17.27092 | Pt | 0 | 0 | 0.00000 |

|        |     |    |          |          |          |    |   |   |         |
|--------|-----|----|----------|----------|----------|----|---|---|---------|
| HETATM | 100 | Pt | 17.32560 | 10.66643 | 17.27092 | Pt | 0 | 0 | 0.00000 |
| HETATM | 101 | Pt | 7.65656  | 19.04007 | 17.27092 | Pt | 0 | 0 | 0.00000 |
| HETATM | 102 | Pt | 7.65656  | 7.87522  | 17.27092 | Pt | 0 | 0 | 0.00000 |
| HETATM | 103 | Pt | 17.32560 | 24.62250 | 17.27092 | Pt | 0 | 0 | 0.00000 |
| HETATM | 104 | Pt | 17.32560 | 13.45764 | 17.27092 | Pt | 0 | 0 | 0.00000 |
| HETATM | 105 | Pt | 7.65656  | 21.83128 | 17.27092 | Pt | 0 | 0 | 0.00000 |
| HETATM | 106 | Pt | 7.65656  | 10.66643 | 17.27092 | Pt | 0 | 0 | 0.00000 |
| HETATM | 107 | Pt | 17.32560 | 27.41371 | 17.27092 | Pt | 0 | 0 | 0.00000 |
| HETATM | 108 | Pt | 17.32560 | 16.24885 | 17.27092 | Pt | 0 | 0 | 0.00000 |
| HETATM | 109 | Pt | 7.65656  | 24.62249 | 17.27092 | Pt | 0 | 0 | 0.00000 |
| HETATM | 110 | Pt | 7.65656  | 13.45764 | 17.27092 | Pt | 0 | 0 | 0.00000 |
| HETATM | 111 | Pt | 17.32560 | 30.20492 | 17.27092 | Pt | 0 | 0 | 0.00000 |
| HETATM | 112 | Pt | 17.32560 | 19.04006 | 17.27092 | Pt | 0 | 0 | 0.00000 |
| HETATM | 113 | Pt | 10.07383 | 17.64446 | 17.27092 | Pt | 0 | 0 | 0.00000 |
| HETATM | 114 | Pt | 10.07383 | 6.47961  | 17.27092 | Pt | 0 | 0 | 0.00000 |
| HETATM | 115 | Pt | 0.40478  | 12.06203 | 17.27092 | Pt | 0 | 0 | 0.00000 |
| HETATM | 116 | Pt | 0.40478  | 0.89719  | 17.27092 | Pt | 0 | 0 | 0.00000 |
| HETATM | 117 | Pt | 10.07383 | 20.43568 | 17.27092 | Pt | 0 | 0 | 0.00000 |
| HETATM | 118 | Pt | 10.07383 | 9.27083  | 17.27092 | Pt | 0 | 0 | 0.00000 |
| HETATM | 119 | Pt | 0.40478  | 14.85326 | 17.27092 | Pt | 0 | 0 | 0.00000 |
| HETATM | 120 | Pt | 0.40478  | 3.68841  | 17.27092 | Pt | 0 | 0 | 0.00000 |
| HETATM | 121 | Pt | 10.07383 | 23.22689 | 17.27092 | Pt | 0 | 0 | 0.00000 |
| HETATM | 122 | Pt | 10.07383 | 12.06204 | 17.27092 | Pt | 0 | 0 | 0.00000 |
| HETATM | 123 | Pt | 0.40478  | 17.64447 | 17.27092 | Pt | 0 | 0 | 0.00000 |
| HETATM | 124 | Pt | 0.40478  | 6.47962  | 17.27092 | Pt | 0 | 0 | 0.00000 |
| HETATM | 125 | Pt | 10.07383 | 26.01810 | 17.27092 | Pt | 0 | 0 | 0.00000 |
| HETATM | 126 | Pt | 10.07383 | 14.85325 | 17.27092 | Pt | 0 | 0 | 0.00000 |
| HETATM | 127 | Pt | 0.40478  | 20.43568 | 17.27092 | Pt | 0 | 0 | 0.00000 |
| HETATM | 128 | Pt | 0.40478  | 9.27083  | 17.27092 | Pt | 0 | 0 | 0.00000 |
| HETATM | 129 | Pt | 3.62749  | 14.85270 | 19.55113 | Pt | 0 | 0 | 0.00000 |
| HETATM | 130 | Pt | 3.62745  | 3.68834  | 19.55087 | Pt | 0 | 0 | 0.00000 |
| HETATM | 131 | Pt | 13.29694 | 20.43535 | 19.55095 | Pt | 0 | 0 | 0.00000 |
| HETATM | 132 | Pt | 13.29678 | 9.27103  | 19.54968 | Pt | 0 | 0 | 0.00000 |
| HETATM | 133 | Pt | 3.62780  | 17.64405 | 19.54929 | Pt | 0 | 0 | 0.00000 |
| HETATM | 134 | Pt | 3.62782  | 6.47960  | 19.54936 | Pt | 0 | 0 | 0.00000 |
| HETATM | 135 | Pt | 13.29714 | 23.22676 | 19.54950 | Pt | 0 | 0 | 0.00000 |
| HETATM | 136 | Pt | 13.29675 | 12.06217 | 19.54990 | Pt | 0 | 0 | 0.00000 |
| HETATM | 137 | Pt | 3.62796  | 20.43586 | 19.54886 | Pt | 0 | 0 | 0.00000 |
| HETATM | 138 | Pt | 3.62784  | 9.27104  | 19.54947 | Pt | 0 | 0 | 0.00000 |
| HETATM | 139 | Pt | 13.29699 | 26.01806 | 19.54897 | Pt | 0 | 0 | 0.00000 |
| HETATM | 140 | Pt | 13.29710 | 14.85334 | 19.54991 | Pt | 0 | 0 | 0.00000 |
| HETATM | 141 | Pt | 3.62742  | 23.22737 | 19.55073 | Pt | 0 | 0 | 0.00000 |
| HETATM | 142 | Pt | 3.62757  | 12.06218 | 19.55111 | Pt | 0 | 0 | 0.00000 |
| HETATM | 143 | Pt | 13.29699 | 28.80933 | 19.54889 | Pt | 0 | 0 | 0.00000 |
| HETATM | 144 | Pt | 13.29694 | 17.64455 | 19.55120 | Pt | 0 | 0 | 0.00000 |
| HETATM | 145 | Pt | 6.04476  | 16.24859 | 19.54935 | Pt | 0 | 0 | 0.00000 |
| HETATM | 146 | Pt | 6.04486  | 5.08426  | 19.54947 | Pt | 0 | 0 | 0.00000 |
| HETATM | 147 | Pt | 15.71406 | 21.83129 | 19.54943 | Pt | 0 | 0 | 0.00000 |
| HETATM | 148 | Pt | 15.71390 | 10.66657 | 19.54960 | Pt | 0 | 0 | 0.00000 |
| HETATM | 149 | Pt | 6.04502  | 19.03994 | 19.54846 | Pt | 0 | 0 | 0.00000 |
| HETATM | 150 | Pt | 6.04512  | 7.87542  | 19.54934 | Pt | 0 | 0 | 0.00000 |
| HETATM | 151 | Pt | 15.71422 | 24.62261 | 19.54934 | Pt | 0 | 0 | 0.00000 |
| HETATM | 152 | Pt | 15.71396 | 13.45767 | 19.54971 | Pt | 0 | 0 | 0.00000 |
| HETATM | 153 | Pt | 6.04475  | 21.83130 | 19.54882 | Pt | 0 | 0 | 0.00000 |
| HETATM | 154 | Pt | 6.04484  | 10.66643 | 19.54987 | Pt | 0 | 0 | 0.00000 |
| HETATM | 155 | Pt | 15.71429 | 27.41367 | 19.54932 | Pt | 0 | 0 | 0.00000 |
| HETATM | 156 | Pt | 15.71398 | 16.24877 | 19.54985 | Pt | 0 | 0 | 0.00000 |
| HETATM | 157 | Pt | 6.04416  | 24.62258 | 19.55012 | Pt | 0 | 0 | 0.00000 |
| HETATM | 158 | Pt | 6.04428  | 13.45746 | 19.55076 | Pt | 0 | 0 | 0.00000 |
| HETATM | 159 | Pt | 15.71440 | 30.20485 | 19.54916 | Pt | 0 | 0 | 0.00000 |
| HETATM | 160 | Pt | 15.71362 | 19.04001 | 19.55050 | Pt | 0 | 0 | 0.00000 |
| HETATM | 161 | Pt | 8.46243  | 17.64461 | 19.54891 | Pt | 0 | 0 | 0.00000 |
| HETATM | 162 | Pt | 8.46232  | 6.47994  | 19.54910 | Pt | 0 | 0 | 0.00000 |

|        |     |    |          |          |          |    |   |   |         |
|--------|-----|----|----------|----------|----------|----|---|---|---------|
| HETATM | 163 | Pt | 18.13150 | 23.22703 | 19.54948 | Pt | 0 | 0 | 0.00000 |
| HETATM | 164 | Pt | 18.13114 | 12.06232 | 19.54977 | Pt | 0 | 0 | 0.00000 |
| HETATM | 165 | Pt | 8.46249  | 20.43538 | 19.54882 | Pt | 0 | 0 | 0.00000 |
| HETATM | 166 | Pt | 8.46227  | 9.27110  | 19.54955 | Pt | 0 | 0 | 0.00000 |
| HETATM | 167 | Pt | 18.13145 | 26.01791 | 19.54985 | Pt | 0 | 0 | 0.00000 |
| HETATM | 168 | Pt | 18.13127 | 14.85310 | 19.54980 | Pt | 0 | 0 | 0.00000 |
| HETATM | 169 | Pt | 8.46197  | 23.22630 | 19.54886 | Pt | 0 | 0 | 0.00000 |
| HETATM | 170 | Pt | 8.46181  | 12.06206 | 19.54968 | Pt | 0 | 0 | 0.00000 |
| HETATM | 171 | Pt | 18.13171 | 28.80888 | 19.54943 | Pt | 0 | 0 | 0.00000 |
| HETATM | 172 | Pt | 18.13116 | 17.64417 | 19.54954 | Pt | 0 | 0 | 0.00000 |
| HETATM | 173 | Pt | 8.46173  | 26.01798 | 19.54868 | Pt | 0 | 0 | 0.00000 |
| HETATM | 174 | Pt | 8.46204  | 14.85349 | 19.54948 | Pt | 0 | 0 | 0.00000 |
| HETATM | 175 | Pt | 18.13166 | 31.60085 | 19.54907 | Pt | 0 | 0 | 0.00000 |
| HETATM | 176 | Pt | 18.13123 | 20.43597 | 19.54946 | Pt | 0 | 0 | 0.00000 |
| HETATM | 177 | Pt | 10.88017 | 19.03993 | 19.55082 | Pt | 0 | 0 | 0.00000 |
| HETATM | 178 | Pt | 10.87961 | 7.87560  | 19.54931 | Pt | 0 | 0 | 0.00000 |
| HETATM | 179 | Pt | 1.21076  | 13.45753 | 19.55110 | Pt | 0 | 0 | 0.00000 |
| HETATM | 180 | Pt | 1.21050  | 2.29292  | 19.55112 | Pt | 0 | 0 | 0.00000 |
| HETATM | 181 | Pt | 10.88008 | 21.83051 | 19.55014 | Pt | 0 | 0 | 0.00000 |
| HETATM | 182 | Pt | 10.87941 | 10.66678 | 19.54987 | Pt | 0 | 0 | 0.00000 |
| HETATM | 183 | Pt | 1.21079  | 16.24809 | 19.55070 | Pt | 0 | 0 | 0.00000 |
| HETATM | 184 | Pt | 1.21070  | 5.08357  | 19.55042 | Pt | 0 | 0 | 0.00000 |
| HETATM | 185 | Pt | 10.87971 | 24.62192 | 19.54872 | Pt | 0 | 0 | 0.00000 |
| HETATM | 186 | Pt | 10.87975 | 13.45798 | 19.54961 | Pt | 0 | 0 | 0.00000 |
| HETATM | 187 | Pt | 1.21106  | 19.03998 | 19.54930 | Pt | 0 | 0 | 0.00000 |
| HETATM | 188 | Pt | 1.21082  | 7.87526  | 19.54943 | Pt | 0 | 0 | 0.00000 |
| HETATM | 189 | Pt | 10.87949 | 27.41359 | 19.54859 | Pt | 0 | 0 | 0.00000 |
| HETATM | 190 | Pt | 10.88007 | 16.24940 | 19.55034 | Pt | 0 | 0 | 0.00000 |
| HETATM | 191 | Pt | 1.21091  | 21.83200 | 19.55011 | Pt | 0 | 0 | 0.00000 |
| HETATM | 192 | Pt | 1.21081  | 10.66694 | 19.55043 | Pt | 0 | 0 | 0.00000 |
| HETATM | 193 | Pt | 2.01680  | 12.06296 | 21.83258 | Pt | 0 | 0 | 0.00000 |
| HETATM | 194 | Pt | 2.01664  | 23.22834 | 21.83230 | Pt | 0 | 0 | 0.00000 |
| HETATM | 195 | Pt | 11.68637 | 17.64538 | 21.83251 | Pt | 0 | 0 | 0.00000 |
| HETATM | 196 | Pt | 11.68538 | 28.80941 | 21.82628 | Pt | 0 | 0 | 0.00000 |
| HETATM | 197 | Pt | 2.01656  | 14.85178 | 21.83293 | Pt | 0 | 0 | 0.00000 |
| HETATM | 198 | Pt | 2.01660  | 3.68748  | 21.83236 | Pt | 0 | 0 | 0.00000 |
| HETATM | 199 | Pt | 11.68641 | 20.43450 | 21.83215 | Pt | 0 | 0 | 0.00000 |
| HETATM | 200 | Pt | 11.68527 | 9.27145  | 21.82874 | Pt | 0 | 0 | 0.00000 |
| HETATM | 201 | Pt | 2.01664  | 17.64350 | 21.82832 | Pt | 0 | 0 | 0.00000 |
| HETATM | 202 | Pt | 2.01678  | 6.47898  | 21.82824 | Pt | 0 | 0 | 0.00000 |
| HETATM | 203 | Pt | 11.68623 | 23.22593 | 21.82784 | Pt | 0 | 0 | 0.00000 |
| HETATM | 204 | Pt | 11.68535 | 12.06221 | 21.82896 | Pt | 0 | 0 | 0.00000 |
| HETATM | 205 | Pt | 2.01734  | 20.43655 | 21.82721 | Pt | 0 | 0 | 0.00000 |
| HETATM | 206 | Pt | 2.01682  | 9.27154  | 21.82834 | Pt | 0 | 0 | 0.00000 |
| HETATM | 207 | Pt | 11.68522 | 26.01768 | 21.82601 | Pt | 0 | 0 | 0.00000 |
| HETATM | 208 | Pt | 11.68633 | 14.85406 | 21.82861 | Pt | 0 | 0 | 0.00000 |
| HETATM | 209 | Pt | 4.43210  | 13.45716 | 21.83294 | Pt | 0 | 0 | 0.00000 |
| HETATM | 210 | Pt | 4.43199  | 24.62287 | 21.83206 | Pt | 0 | 0 | 0.00000 |
| HETATM | 211 | Pt | 14.10165 | 19.03991 | 21.83255 | Pt | 0 | 0 | 0.00000 |
| HETATM | 212 | Pt | 14.10283 | 30.20476 | 21.82719 | Pt | 0 | 0 | 0.00000 |
| HETATM | 213 | Pt | 4.43326  | 16.24836 | 21.82868 | Pt | 0 | 0 | 0.00000 |
| HETATM | 214 | Pt | 4.43349  | 5.08432  | 21.82863 | Pt | 0 | 0 | 0.00000 |
| HETATM | 215 | Pt | 14.10290 | 21.83138 | 21.82881 | Pt | 0 | 0 | 0.00000 |
| HETATM | 216 | Pt | 14.10216 | 10.66668 | 21.82903 | Pt | 0 | 0 | 0.00000 |
| HETATM | 217 | Pt | 4.43364  | 19.03999 | 21.82617 | Pt | 0 | 0 | 0.00000 |
| HETATM | 218 | Pt | 4.43360  | 7.87534  | 21.82729 | Pt | 0 | 0 | 0.00000 |
| HETATM | 219 | Pt | 14.10287 | 24.62303 | 21.82771 | Pt | 0 | 0 | 0.00000 |
| HETATM | 220 | Pt | 14.10275 | 13.45742 | 21.82902 | Pt | 0 | 0 | 0.00000 |
| HETATM | 221 | Pt | 4.43349  | 21.83164 | 21.82777 | Pt | 0 | 0 | 0.00000 |
| HETATM | 222 | Pt | 4.43349  | 10.66627 | 21.82917 | Pt | 0 | 0 | 0.00000 |
| HETATM | 223 | Pt | 14.10278 | 27.41378 | 21.82733 | Pt | 0 | 0 | 0.00000 |
| HETATM | 224 | Pt | 14.10292 | 16.24850 | 21.82983 | Pt | 0 | 0 | 0.00000 |
| HETATM | 225 | Pt | 6.84987  | 14.85301 | 21.82850 | Pt | 0 | 0 | 0.00000 |

|        |     |    |          |          |          |    |   |   |         |
|--------|-----|----|----------|----------|----------|----|---|---|---------|
| HETATM | 226 | Pt | 6.84951  | 26.01845 | 21.82784 | Pt | 0 | 0 | 0.00000 |
| HETATM | 227 | Pt | 16.51906 | 20.43579 | 21.82837 | Pt | 0 | 0 | 0.00000 |
| HETATM | 228 | Pt | 16.52000 | 31.60063 | 21.82707 | Pt | 0 | 0 | 0.00000 |
| HETATM | 229 | Pt | 6.85067  | 17.64448 | 21.82626 | Pt | 0 | 0 | 0.00000 |
| HETATM | 230 | Pt | 6.85124  | 6.48020  | 21.82774 | Pt | 0 | 0 | 0.00000 |
| HETATM | 231 | Pt | 16.51994 | 23.22703 | 21.82738 | Pt | 0 | 0 | 0.00000 |
| HETATM | 232 | Pt | 16.51906 | 12.06213 | 21.82868 | Pt | 0 | 0 | 0.00000 |
| HETATM | 233 | Pt | 6.85079  | 20.43568 | 21.82588 | Pt | 0 | 0 | 0.00000 |
| HETATM | 234 | Pt | 6.85109  | 9.27075  | 21.82841 | Pt | 0 | 0 | 0.00000 |
| HETATM | 235 | Pt | 16.51963 | 26.01835 | 21.82834 | Pt | 0 | 0 | 0.00000 |
| HETATM | 236 | Pt | 16.51972 | 14.85303 | 21.82856 | Pt | 0 | 0 | 0.00000 |
| HETATM | 237 | Pt | 6.84962  | 23.22677 | 21.82724 | Pt | 0 | 0 | 0.00000 |
| HETATM | 238 | Pt | 6.84973  | 12.06148 | 21.82947 | Pt | 0 | 0 | 0.00000 |
| HETATM | 239 | Pt | 16.52007 | 28.80910 | 21.82782 | Pt | 0 | 0 | 0.00000 |
| HETATM | 240 | Pt | 16.51904 | 17.64423 | 21.82867 | Pt | 0 | 0 | 0.00000 |
| HETATM | 241 | Pt | 9.26827  | 16.25015 | 21.82727 | Pt | 0 | 0 | 0.00000 |
| HETATM | 242 | Pt | 9.26765  | 27.41343 | 21.82589 | Pt | 0 | 0 | 0.00000 |
| HETATM | 243 | Pt | 18.93744 | 21.83212 | 21.82837 | Pt | 0 | 0 | 0.00000 |
| HETATM | 244 | Pt | 18.93777 | 32.99741 | 21.82775 | Pt | 0 | 0 | 0.00000 |
| HETATM | 245 | Pt | 9.26836  | 19.04018 | 21.82784 | Pt | 0 | 0 | 0.00000 |
| HETATM | 246 | Pt | 9.26831  | 7.87591  | 21.82792 | Pt | 0 | 0 | 0.00000 |
| HETATM | 247 | Pt | 18.93698 | 24.62240 | 21.82916 | Pt | 0 | 0 | 0.00000 |
| HETATM | 248 | Pt | 18.93651 | 13.45764 | 21.82967 | Pt | 0 | 0 | 0.00000 |
| HETATM | 249 | Pt | 9.26850  | 21.83021 | 21.82721 | Pt | 0 | 0 | 0.00000 |
| HETATM | 250 | Pt | 9.26784  | 10.66652 | 21.82874 | Pt | 0 | 0 | 0.00000 |
| HETATM | 251 | Pt | 18.93715 | 27.41255 | 21.82932 | Pt | 0 | 0 | 0.00000 |
| HETATM | 252 | Pt | 18.93732 | 16.24801 | 21.82855 | Pt | 0 | 0 | 0.00000 |
| HETATM | 253 | Pt | 9.26774  | 24.62200 | 21.82472 | Pt | 0 | 0 | 0.00000 |
| HETATM | 254 | Pt | 9.26809  | 13.45733 | 21.82660 | Pt | 0 | 0 | 0.00000 |
| HETATM | 255 | Pt | 18.93725 | 30.20492 | 21.82588 | Pt | 0 | 0 | 0.00000 |
| HETATM | 256 | Pt | 18.93709 | 19.04007 | 21.82596 | Pt | 0 | 0 | 0.00000 |
| HETATM | 257 | Pt | 2.82166  | 13.45716 | 24.12244 | Pt | 0 | 0 | 0.00000 |
| HETATM | 258 | Pt | 2.82196  | 2.29322  | 24.12151 | Pt | 0 | 0 | 0.00000 |
| HETATM | 259 | Pt | 12.49148 | 19.04030 | 24.12165 | Pt | 0 | 0 | 0.00000 |
| HETATM | 260 | Pt | 12.49162 | 7.87550  | 24.10495 | Pt | 0 | 0 | 0.00000 |
| HETATM | 261 | Pt | 2.82322  | 16.24640 | 24.11016 | Pt | 0 | 0 | 0.00000 |
| HETATM | 262 | Pt | 2.82393  | 5.08206  | 24.10978 | Pt | 0 | 0 | 0.00000 |
| HETATM | 263 | Pt | 12.49341 | 21.82969 | 24.10981 | Pt | 0 | 0 | 0.00000 |
| HETATM | 264 | Pt | 12.49095 | 10.66631 | 24.11014 | Pt | 0 | 0 | 0.00000 |
| HETATM | 265 | Pt | 2.82142  | 19.04002 | 24.10376 | Pt | 0 | 0 | 0.00000 |
| HETATM | 266 | Pt | 2.82093  | 7.87519  | 24.10515 | Pt | 0 | 0 | 0.00000 |
| HETATM | 267 | Pt | 12.49056 | 24.62294 | 24.10485 | Pt | 0 | 0 | 0.00000 |
| HETATM | 268 | Pt | 12.49102 | 13.45721 | 24.10729 | Pt | 0 | 0 | 0.00000 |
| HETATM | 269 | Pt | 2.82444  | 21.83392 | 24.10887 | Pt | 0 | 0 | 0.00000 |
| HETATM | 270 | Pt | 2.82392  | 10.66830 | 24.11022 | Pt | 0 | 0 | 0.00000 |
| HETATM | 271 | Pt | 12.49048 | 27.41339 | 24.10332 | Pt | 0 | 0 | 0.00000 |
| HETATM | 272 | Pt | 12.49313 | 16.25055 | 24.11098 | Pt | 0 | 0 | 0.00000 |
| HETATM | 273 | Pt | 5.23634  | 14.85320 | 24.11016 | Pt | 0 | 0 | 0.00000 |
| HETATM | 274 | Pt | 5.23663  | 3.68953  | 24.10968 | Pt | 0 | 0 | 0.00000 |
| HETATM | 275 | Pt | 14.90580 | 20.43641 | 24.11009 | Pt | 0 | 0 | 0.00000 |
| HETATM | 276 | Pt | 14.90738 | 9.27034  | 24.10533 | Pt | 0 | 0 | 0.00000 |
| HETATM | 277 | Pt | 5.23939  | 17.64497 | 24.10398 | Pt | 0 | 0 | 0.00000 |
| HETATM | 278 | Pt | 5.24002  | 6.48054  | 24.10530 | Pt | 0 | 0 | 0.00000 |
| HETATM | 279 | Pt | 14.90889 | 23.22816 | 24.10554 | Pt | 0 | 0 | 0.00000 |
| HETATM | 280 | Pt | 14.90698 | 12.06160 | 24.10994 | Pt | 0 | 0 | 0.00000 |
| HETATM | 281 | Pt | 5.23983  | 20.43555 | 24.10344 | Pt | 0 | 0 | 0.00000 |
| HETATM | 282 | Pt | 5.23994  | 9.26985  | 24.10599 | Pt | 0 | 0 | 0.00000 |
| HETATM | 283 | Pt | 14.90804 | 26.01954 | 24.10768 | Pt | 0 | 0 | 0.00000 |
| HETATM | 284 | Pt | 14.90907 | 14.85172 | 24.10839 | Pt | 0 | 0 | 0.00000 |
| HETATM | 285 | Pt | 5.23660  | 23.22690 | 24.10894 | Pt | 0 | 0 | 0.00000 |
| HETATM | 286 | Pt | 5.23688  | 12.06050 | 24.11123 | Pt | 0 | 0 | 0.00000 |
| HETATM | 287 | Pt | 14.90790 | 28.80931 | 24.10661 | Pt | 0 | 0 | 0.00000 |
| HETATM | 288 | Pt | 14.90583 | 17.64354 | 24.11066 | Pt | 0 | 0 | 0.00000 |

|        |     |    |          |          |          |    |   |   |         |
|--------|-----|----|----------|----------|----------|----|---|---|---------|
| HETATM | 289 | Pt | 7.65657  | 16.24843 | 24.10409 | Pt | 0 | 0 | 0.00000 |
| HETATM | 290 | Pt | 7.65709  | 5.08368  | 24.10505 | Pt | 0 | 0 | 0.00000 |
| HETATM | 291 | Pt | 17.32617 | 21.83039 | 24.10527 | Pt | 0 | 0 | 0.00000 |
| HETATM | 292 | Pt | 17.32712 | 10.66591 | 24.10406 | Pt | 0 | 0 | 0.00000 |
| HETATM | 293 | Pt | 7.65599  | 19.04057 | 24.10353 | Pt | 0 | 0 | 0.00000 |
| HETATM | 294 | Pt | 7.65802  | 7.87543  | 24.10775 | Pt | 0 | 0 | 0.00000 |
| HETATM | 295 | Pt | 17.32450 | 24.62272 | 24.10600 | Pt | 0 | 0 | 0.00000 |
| HETATM | 296 | Pt | 17.32402 | 13.45699 | 24.10821 | Pt | 0 | 0 | 0.00000 |
| HETATM | 297 | Pt | 7.65713  | 21.83247 | 24.10337 | Pt | 0 | 0 | 0.00000 |
| HETATM | 298 | Pt | 7.65761  | 10.66582 | 24.10825 | Pt | 0 | 0 | 0.00000 |
| HETATM | 299 | Pt | 17.32446 | 27.41471 | 24.10804 | Pt | 0 | 0 | 0.00000 |
| HETATM | 300 | Pt | 17.32623 | 16.24968 | 24.10598 | Pt | 0 | 0 | 0.00000 |
| HETATM | 301 | Pt | 7.65774  | 24.62254 | 24.10184 | Pt | 0 | 0 | 0.00000 |
| HETATM | 302 | Pt | 7.65856  | 13.45694 | 24.10421 | Pt | 0 | 0 | 0.00000 |
| HETATM | 303 | Pt | 17.32546 | 30.20510 | 24.10490 | Pt | 0 | 0 | 0.00000 |
| HETATM | 304 | Pt | 17.32695 | 19.04005 | 24.10382 | Pt | 0 | 0 | 0.00000 |
| HETATM | 305 | Pt | 10.07477 | 17.64806 | 24.10910 | Pt | 0 | 0 | 0.00000 |
| HETATM | 306 | Pt | 10.07336 | 6.47840  | 24.10269 | Pt | 0 | 0 | 0.00000 |
| HETATM | 307 | Pt | 0.40542  | 12.06466 | 24.11024 | Pt | 0 | 0 | 0.00000 |
| HETATM | 308 | Pt | 0.40534  | 0.90003  | 24.11080 | Pt | 0 | 0 | 0.00000 |
| HETATM | 309 | Pt | 10.07506 | 20.43351 | 24.10892 | Pt | 0 | 0 | 0.00000 |
| HETATM | 310 | Pt | 10.07468 | 9.27142  | 24.10896 | Pt | 0 | 0 | 0.00000 |
| HETATM | 311 | Pt | 0.40455  | 14.85048 | 24.11118 | Pt | 0 | 0 | 0.00000 |
| HETATM | 312 | Pt | 0.40535  | 3.68569  | 24.11035 | Pt | 0 | 0 | 0.00000 |
| HETATM | 313 | Pt | 10.07317 | 23.22797 | 24.10175 | Pt | 0 | 0 | 0.00000 |
| HETATM | 314 | Pt | 10.07426 | 12.06070 | 24.10745 | Pt | 0 | 0 | 0.00000 |
| HETATM | 315 | Pt | 0.40311  | 17.64573 | 24.10392 | Pt | 0 | 0 | 0.00000 |
| HETATM | 316 | Pt | 0.40413  | 6.48074  | 24.10369 | Pt | 0 | 0 | 0.00000 |
| HETATM | 317 | Pt | 10.07315 | 26.01691 | 24.10232 | Pt | 0 | 0 | 0.00000 |
| HETATM | 318 | Pt | 10.07216 | 14.85377 | 24.10094 | Pt | 0 | 0 | 0.00000 |
| HETATM | 319 | Pt | 0.40558  | 20.43455 | 24.10127 | Pt | 0 | 0 | 0.00000 |
| HETATM | 320 | Pt | 0.40408  | 9.26963  | 24.10366 | Pt | 0 | 0 | 0.00000 |
| HETATM | 321 | Pt | 3.62579  | 14.85081 | 26.41120 | Pt | 0 | 0 | 0.00000 |
| HETATM | 322 | Pt | 3.62758  | 3.68708  | 26.41061 | Pt | 0 | 0 | 0.00000 |
| HETATM | 323 | Pt | 13.29596 | 20.43530 | 26.41086 | Pt | 0 | 0 | 0.00000 |
| HETATM | 324 | Pt | 13.29578 | 9.27011  | 26.39178 | Pt | 0 | 0 | 0.00000 |
| HETATM | 325 | Pt | 3.62615  | 17.64677 | 26.38029 | Pt | 0 | 0 | 0.00000 |
| HETATM | 326 | Pt | 3.62667  | 6.48207  | 26.38135 | Pt | 0 | 0 | 0.00000 |
| HETATM | 327 | Pt | 13.29479 | 23.23197 | 26.38144 | Pt | 0 | 0 | 0.00000 |
| HETATM | 328 | Pt | 13.29024 | 12.05899 | 26.39513 | Pt | 0 | 0 | 0.00000 |
| HETATM | 329 | Pt | 3.62720  | 20.43369 | 26.37961 | Pt | 0 | 0 | 0.00000 |
| HETATM | 330 | Pt | 3.62660  | 9.26789  | 26.38177 | Pt | 0 | 0 | 0.00000 |
| HETATM | 331 | Pt | 13.29516 | 26.01993 | 26.38465 | Pt | 0 | 0 | 0.00000 |
| HETATM | 332 | Pt | 13.29379 | 14.85007 | 26.38440 | Pt | 0 | 0 | 0.00000 |
| HETATM | 333 | Pt | 3.62764  | 23.22974 | 26.41010 | Pt | 0 | 0 | 0.00000 |
| HETATM | 334 | Pt | 3.62707  | 12.06308 | 26.41173 | Pt | 0 | 0 | 0.00000 |
| HETATM | 335 | Pt | 13.29292 | 28.80742 | 26.38314 | Pt | 0 | 0 | 0.00000 |
| HETATM | 336 | Pt | 13.29564 | 17.64751 | 26.41097 | Pt | 0 | 0 | 0.00000 |
| HETATM | 337 | Pt | 6.04694  | 16.24914 | 26.38040 | Pt | 0 | 0 | 0.00000 |
| HETATM | 338 | Pt | 6.05016  | 5.08436  | 26.38132 | Pt | 0 | 0 | 0.00000 |
| HETATM | 339 | Pt | 15.71695 | 21.83203 | 26.38161 | Pt | 0 | 0 | 0.00000 |
| HETATM | 340 | Pt | 15.72211 | 10.66027 | 26.37603 | Pt | 0 | 0 | 0.00000 |
| HETATM | 341 | Pt | 6.04514  | 19.04083 | 26.38148 | Pt | 0 | 0 | 0.00000 |
| HETATM | 342 | Pt | 6.04647  | 7.87450  | 26.38470 | Pt | 0 | 0 | 0.00000 |
| HETATM | 343 | Pt | 15.71299 | 24.62443 | 26.38491 | Pt | 0 | 0 | 0.00000 |
| HETATM | 344 | Pt | 15.71389 | 13.45391 | 26.39176 | Pt | 0 | 0 | 0.00000 |
| HETATM | 345 | Pt | 6.04851  | 21.83238 | 26.37964 | Pt | 0 | 0 | 0.00000 |
| HETATM | 346 | Pt | 6.05109  | 10.66439 | 26.38374 | Pt | 0 | 0 | 0.00000 |
| HETATM | 347 | Pt | 15.70986 | 27.41789 | 26.39102 | Pt | 0 | 0 | 0.00000 |
| HETATM | 348 | Pt | 15.71728 | 16.24829 | 26.38305 | Pt | 0 | 0 | 0.00000 |
| HETATM | 349 | Pt | 6.05726  | 24.62329 | 26.37246 | Pt | 0 | 0 | 0.00000 |
| HETATM | 350 | Pt | 6.05656  | 13.45688 | 26.37377 | Pt | 0 | 0 | 0.00000 |
| HETATM | 351 | Pt | 15.71520 | 30.20587 | 26.38368 | Pt | 0 | 0 | 0.00000 |

|        |     |    |          |          |          |    |   |   |         |
|--------|-----|----|----------|----------|----------|----|---|---|---------|
| HETATM | 352 | Pt | 15.72546 | 19.04035 | 26.37384 | Pt | 0 | 0 | 0.00000 |
| HETATM | 353 | Pt | 8.46047  | 17.64334 | 26.37989 | Pt | 0 | 0 | 0.00000 |
| HETATM | 354 | Pt | 8.46442  | 6.47857  | 26.38575 | Pt | 0 | 0 | 0.00000 |
| HETATM | 355 | Pt | 18.12936 | 23.22476 | 26.38187 | Pt | 0 | 0 | 0.00000 |
| HETATM | 356 | Pt | 18.12966 | 12.05764 | 26.38538 | Pt | 0 | 0 | 0.00000 |
| HETATM | 357 | Pt | 8.46121  | 20.43948 | 26.37964 | Pt | 0 | 0 | 0.00000 |
| HETATM | 358 | Pt | 8.46733  | 9.26757  | 26.39094 | Pt | 0 | 0 | 0.00000 |
| HETATM | 359 | Pt | 18.12646 | 26.02275 | 26.38364 | Pt | 0 | 0 | 0.00000 |
| HETATM | 360 | Pt | 18.13027 | 14.85562 | 26.38283 | Pt | 0 | 0 | 0.00000 |
| HETATM | 361 | Pt | 8.46231  | 23.22710 | 26.38582 | Pt | 0 | 0 | 0.00000 |
| HETATM | 362 | Pt | 8.46443  | 12.06150 | 26.38819 | Pt | 0 | 0 | 0.00000 |
| HETATM | 363 | Pt | 18.12879 | 28.81108 | 26.38832 | Pt | 0 | 0 | 0.00000 |
| HETATM | 364 | Pt | 18.13171 | 17.64479 | 26.38838 | Pt | 0 | 0 | 0.00000 |
| HETATM | 365 | Pt | 8.46360  | 26.01751 | 26.38382 | Pt | 0 | 0 | 0.00000 |
| HETATM | 366 | Pt | 8.45982  | 14.85538 | 26.38730 | Pt | 0 | 0 | 0.00000 |
| HETATM | 367 | Pt | 18.13669 | 31.59805 | 26.38165 | Pt | 0 | 0 | 0.00000 |
| HETATM | 368 | Pt | 18.13139 | 20.43574 | 26.38821 | Pt | 0 | 0 | 0.00000 |
| HETATM | 369 | Pt | 10.88199 | 19.04210 | 26.41014 | Pt | 0 | 0 | 0.00000 |
| HETATM | 370 | Pt | 10.87924 | 7.86392  | 26.37538 | Pt | 0 | 0 | 0.00000 |
| HETATM | 371 | Pt | 1.21139  | 13.45784 | 26.41177 | Pt | 0 | 0 | 0.00000 |
| HETATM | 372 | Pt | 1.21345  | 2.29289  | 26.41096 | Pt | 0 | 0 | 0.00000 |
| HETATM | 373 | Pt | 10.87408 | 21.84249 | 26.37243 | Pt | 0 | 0 | 0.00000 |
| HETATM | 374 | Pt | 10.88370 | 10.66897 | 26.39508 | Pt | 0 | 0 | 0.00000 |
| HETATM | 375 | Pt | 1.20330  | 16.25889 | 26.37391 | Pt | 0 | 0 | 0.00000 |
| HETATM | 376 | Pt | 1.20525  | 5.09386  | 26.37350 | Pt | 0 | 0 | 0.00000 |
| HETATM | 377 | Pt | 10.87849 | 24.62308 | 26.38358 | Pt | 0 | 0 | 0.00000 |
| HETATM | 378 | Pt | 10.87417 | 13.46323 | 26.38069 | Pt | 0 | 0 | 0.00000 |
| HETATM | 379 | Pt | 1.21267  | 19.03947 | 26.38614 | Pt | 0 | 0 | 0.00000 |
| HETATM | 380 | Pt | 1.21048  | 7.87520  | 26.38810 | Pt | 0 | 0 | 0.00000 |
| HETATM | 381 | Pt | 10.87680 | 27.40756 | 26.37774 | Pt | 0 | 0 | 0.00000 |
| HETATM | 382 | Pt | 10.87288 | 16.24183 | 26.37318 | Pt | 0 | 0 | 0.00000 |
| HETATM | 383 | Pt | 1.20681  | 21.82158 | 26.37235 | Pt | 0 | 0 | 0.00000 |
| HETATM | 384 | Pt | 1.20470  | 10.65654 | 26.37353 | Pt | 0 | 0 | 0.00000 |
| HETATM | 385 | Pt | 2.01931  | 12.06878 | 28.74584 | Pt | 0 | 0 | 0.00000 |
| HETATM | 386 | Pt | 2.02311  | 23.23479 | 28.74580 | Pt | 0 | 0 | 0.00000 |
| HETATM | 387 | Pt | 11.68877 | 17.65676 | 28.74557 | Pt | 0 | 0 | 0.00000 |
| HETATM | 388 | Pt | 11.67825 | 28.79055 | 28.65693 | Pt | 0 | 0 | 0.00000 |
| HETATM | 389 | Pt | 2.01908  | 14.84533 | 28.74654 | Pt | 0 | 0 | 0.00000 |
| HETATM | 390 | Pt | 2.02295  | 3.68206  | 28.74609 | Pt | 0 | 0 | 0.00000 |
| HETATM | 391 | Pt | 11.68966 | 20.43239 | 28.74547 | Pt | 0 | 0 | 0.00000 |
| HETATM | 392 | Pt | 11.67401 | 9.27280  | 28.72062 | Pt | 0 | 0 | 0.00000 |
| HETATM | 393 | Pt | 2.02465  | 17.65453 | 28.68141 | Pt | 0 | 0 | 0.00000 |
| HETATM | 394 | Pt | 2.02403  | 6.49155  | 28.68185 | Pt | 0 | 0 | 0.00000 |
| HETATM | 395 | Pt | 11.68986 | 23.24261 | 28.68042 | Pt | 0 | 0 | 0.00000 |
| HETATM | 396 | Pt | 11.66795 | 12.08253 | 28.67741 | Pt | 0 | 0 | 0.00000 |
| HETATM | 397 | Pt | 2.02597  | 20.42422 | 28.68038 | Pt | 0 | 0 | 0.00000 |
| HETATM | 398 | Pt | 2.02304  | 9.25944  | 28.68199 | Pt | 0 | 0 | 0.00000 |
| HETATM | 399 | Pt | 11.68076 | 26.01410 | 28.66488 | Pt | 0 | 0 | 0.00000 |
| HETATM | 400 | Pt | 11.68839 | 14.84947 | 28.68618 | Pt | 0 | 0 | 0.00000 |
| HETATM | 401 | Pt | 4.42307  | 13.45729 | 28.74622 | Pt | 0 | 0 | 0.00000 |
| HETATM | 402 | Pt | 4.42753  | 24.62388 | 28.74530 | Pt | 0 | 0 | 0.00000 |
| HETATM | 403 | Pt | 14.09426 | 19.04379 | 28.74639 | Pt | 0 | 0 | 0.00000 |
| HETATM | 404 | Pt | 14.11665 | 30.17457 | 28.70241 | Pt | 0 | 0 | 0.00000 |
| HETATM | 405 | Pt | 4.44663  | 16.27368 | 28.64816 | Pt | 0 | 0 | 0.00000 |
| HETATM | 406 | Pt | 4.45135  | 5.10916  | 28.64824 | Pt | 0 | 0 | 0.00000 |
| HETATM | 407 | Pt | 14.11589 | 21.86018 | 28.64847 | Pt | 0 | 0 | 0.00000 |
| HETATM | 408 | Pt | 14.10022 | 10.67277 | 28.72004 | Pt | 0 | 0 | 0.00000 |
| HETATM | 409 | Pt | 4.43817  | 19.04044 | 28.66298 | Pt | 0 | 0 | 0.00000 |
| HETATM | 410 | Pt | 4.44045  | 7.87433  | 28.66511 | Pt | 0 | 0 | 0.00000 |
| HETATM | 411 | Pt | 14.10135 | 24.62886 | 28.66600 | Pt | 0 | 0 | 0.00000 |
| HETATM | 412 | Pt | 14.10235 | 13.46661 | 28.67533 | Pt | 0 | 0 | 0.00000 |
| HETATM | 413 | Pt | 4.44909  | 21.80741 | 28.64713 | Pt | 0 | 0 | 0.00000 |
| HETATM | 414 | Pt | 4.44915  | 10.63982 | 28.64938 | Pt | 0 | 0 | 0.00000 |

|        |     |    |          |          |          |    |   |   |         |
|--------|-----|----|----------|----------|----------|----|---|---|---------|
| HETATM | 415 | Pt | 14.09683 | 27.40014 | 28.67838 | Pt | 0 | 0 | 0.00000 |
| HETATM | 416 | Pt | 14.11768 | 16.23050 | 28.64944 | Pt | 0 | 0 | 0.00000 |
| HETATM | 417 | Pt | 6.85293  | 14.86675 | 28.68181 | Pt | 0 | 0 | 0.00000 |
| HETATM | 418 | Pt | 6.86247  | 26.02977 | 28.68038 | Pt | 0 | 0 | 0.00000 |
| HETATM | 419 | Pt | 16.52653 | 20.44909 | 28.68202 | Pt | 0 | 0 | 0.00000 |
| HETATM | 420 | Pt | 16.53517 | 31.59264 | 28.65826 | Pt | 0 | 0 | 0.00000 |
| HETATM | 421 | Pt | 6.84802  | 17.64920 | 28.66307 | Pt | 0 | 0 | 0.00000 |
| HETATM | 422 | Pt | 6.85608  | 6.48069  | 28.66620 | Pt | 0 | 0 | 0.00000 |
| HETATM | 423 | Pt | 16.51557 | 23.23401 | 28.66525 | Pt | 0 | 0 | 0.00000 |
| HETATM | 424 | Pt | 16.53153 | 12.06439 | 28.68760 | Pt | 0 | 0 | 0.00000 |
| HETATM | 425 | Pt | 6.84922  | 20.43345 | 28.66281 | Pt | 0 | 0 | 0.00000 |
| HETATM | 426 | Pt | 6.85526  | 9.26328  | 28.66844 | Pt | 0 | 0 | 0.00000 |
| HETATM | 427 | Pt | 16.51044 | 26.02158 | 28.66860 | Pt | 0 | 0 | 0.00000 |
| HETATM | 428 | Pt | 16.52019 | 14.85147 | 28.66788 | Pt | 0 | 0 | 0.00000 |
| HETATM | 429 | Pt | 6.85792  | 23.21644 | 28.68053 | Pt | 0 | 0 | 0.00000 |
| HETATM | 430 | Pt | 6.85376  | 12.05127 | 28.68261 | Pt | 0 | 0 | 0.00000 |
| HETATM | 431 | Pt | 16.53061 | 28.80471 | 28.67939 | Pt | 0 | 0 | 0.00000 |
| HETATM | 432 | Pt | 16.52809 | 17.63588 | 28.68237 | Pt | 0 | 0 | 0.00000 |
| HETATM | 433 | Pt | 9.25272  | 16.25204 | 28.68109 | Pt | 0 | 0 | 0.00000 |
| HETATM | 434 | Pt | 9.26899  | 27.40794 | 28.66519 | Pt | 0 | 0 | 0.00000 |
| HETATM | 435 | Pt | 18.92339 | 21.83228 | 28.68205 | Pt | 0 | 0 | 0.00000 |
| HETATM | 436 | Pt | 18.92884 | 32.99188 | 28.68066 | Pt | 0 | 0 | 0.00000 |
| HETATM | 437 | Pt | 9.23928  | 19.04206 | 28.64718 | Pt | 0 | 0 | 0.00000 |
| HETATM | 438 | Pt | 9.25435  | 7.85957  | 28.68768 | Pt | 0 | 0 | 0.00000 |
| HETATM | 439 | Pt | 18.90519 | 24.62456 | 28.64945 | Pt | 0 | 0 | 0.00000 |
| HETATM | 440 | Pt | 18.91268 | 13.45848 | 28.64973 | Pt | 0 | 0 | 0.00000 |
| HETATM | 441 | Pt | 9.25522  | 21.83242 | 28.68049 | Pt | 0 | 0 | 0.00000 |
| HETATM | 442 | Pt | 9.25409  | 10.67316 | 28.67640 | Pt | 0 | 0 | 0.00000 |
| HETATM | 443 | Pt | 18.92388 | 27.41408 | 28.68272 | Pt | 0 | 0 | 0.00000 |
| HETATM | 444 | Pt | 18.92597 | 16.25075 | 28.68233 | Pt | 0 | 0 | 0.00000 |
| HETATM | 445 | Pt | 9.26690  | 24.62039 | 28.66648 | Pt | 0 | 0 | 0.00000 |
| HETATM | 446 | Pt | 9.25695  | 13.46492 | 28.67260 | Pt | 0 | 0 | 0.00000 |
| HETATM | 447 | Pt | 18.94644 | 30.20212 | 28.66757 | Pt | 0 | 0 | 0.00000 |
| HETATM | 448 | Pt | 18.93787 | 19.04145 | 28.66984 | Pt | 0 | 0 | 0.00000 |
| HETATM | 449 | O  | 2.82085  | 13.45694 | 29.86546 | O  | 0 | 0 | 0.00000 |
| HETATM | 450 | O  | 2.82508  | 2.29348  | 29.86493 | O  | 0 | 0 | 0.00000 |
| HETATM | 451 | O  | 12.49014 | 19.04388 | 29.86513 | O  | 0 | 0 | 0.00000 |
| HETATM | 452 | O  | 12.98495 | 9.80460  | 29.89067 | O  | 0 | 0 | 0.00000 |

UNIT ENERGY kcal  
ENERGY -57844.869665  
END

XTLGRF 200

DESCRP FS

REMARK Pt111\_0.06ML\_8x8x7\_30.0\_vac fcc-displacement

FIXATOMS 1 128

CRYSTX 22.32970 22.32970 43.67409 90.00000 90.00000 60.00000

FORMAT ATOM (a6,1x,i5,1x,a5,1x,a3,1x,a1,1x,a5,3f10.5,1x,a5,i3,i2,1x,f8.5)

|        |    |    |          |          |          |    |   |   |         |
|--------|----|----|----------|----------|----------|----|---|---|---------|
| HETATM | 1  | Pt | 2.01640  | 12.06188 | 14.99203 | Pt | 0 | 0 | 0.00000 |
| HETATM | 2  | Pt | 2.01640  | 23.22673 | 14.99203 | Pt | 0 | 0 | 0.00000 |
| HETATM | 3  | Pt | 11.68544 | 17.64431 | 14.99203 | Pt | 0 | 0 | 0.00000 |
| HETATM | 4  | Pt | 11.68544 | 28.80916 | 14.99203 | Pt | 0 | 0 | 0.00000 |
| HETATM | 5  | Pt | 2.01640  | 14.85309 | 14.99203 | Pt | 0 | 0 | 0.00000 |
| HETATM | 6  | Pt | 2.01640  | 3.68824  | 14.99203 | Pt | 0 | 0 | 0.00000 |
| HETATM | 7  | Pt | 11.68544 | 20.43552 | 14.99203 | Pt | 0 | 0 | 0.00000 |
| HETATM | 8  | Pt | 11.68544 | 9.27067  | 14.99203 | Pt | 0 | 0 | 0.00000 |
| HETATM | 9  | Pt | 2.01640  | 17.64430 | 14.99203 | Pt | 0 | 0 | 0.00000 |
| HETATM | 10 | Pt | 2.01640  | 6.47945  | 14.99203 | Pt | 0 | 0 | 0.00000 |
| HETATM | 11 | Pt | 11.68544 | 23.22672 | 14.99203 | Pt | 0 | 0 | 0.00000 |
| HETATM | 12 | Pt | 11.68544 | 12.06188 | 14.99203 | Pt | 0 | 0 | 0.00000 |
| HETATM | 13 | Pt | 2.01640  | 20.43552 | 14.99203 | Pt | 0 | 0 | 0.00000 |
| HETATM | 14 | Pt | 2.01640  | 9.27067  | 14.99203 | Pt | 0 | 0 | 0.00000 |
| HETATM | 15 | Pt | 11.68544 | 26.01795 | 14.99203 | Pt | 0 | 0 | 0.00000 |

|        |    |    |          |          |          |    |   |   |         |
|--------|----|----|----------|----------|----------|----|---|---|---------|
| HETATM | 16 | Pt | 11.68544 | 14.85310 | 14.99203 | Pt | 0 | 0 | 0.00000 |
| HETATM | 17 | Pt | 4.43366  | 13.45749 | 14.99203 | Pt | 0 | 0 | 0.00000 |
| HETATM | 18 | Pt | 4.43366  | 24.62234 | 14.99203 | Pt | 0 | 0 | 0.00000 |
| HETATM | 19 | Pt | 14.10270 | 19.03992 | 14.99203 | Pt | 0 | 0 | 0.00000 |
| HETATM | 20 | Pt | 14.10270 | 30.20476 | 14.99203 | Pt | 0 | 0 | 0.00000 |
| HETATM | 21 | Pt | 4.43366  | 16.24870 | 14.99203 | Pt | 0 | 0 | 0.00000 |
| HETATM | 22 | Pt | 4.43366  | 5.08385  | 14.99203 | Pt | 0 | 0 | 0.00000 |
| HETATM | 23 | Pt | 14.10270 | 21.83113 | 14.99203 | Pt | 0 | 0 | 0.00000 |
| HETATM | 24 | Pt | 14.10270 | 10.66627 | 14.99203 | Pt | 0 | 0 | 0.00000 |
| HETATM | 25 | Pt | 4.43366  | 19.03991 | 14.99203 | Pt | 0 | 0 | 0.00000 |
| HETATM | 26 | Pt | 4.43366  | 7.87506  | 14.99203 | Pt | 0 | 0 | 0.00000 |
| HETATM | 27 | Pt | 14.10270 | 24.62234 | 14.99203 | Pt | 0 | 0 | 0.00000 |
| HETATM | 28 | Pt | 14.10270 | 13.45748 | 14.99203 | Pt | 0 | 0 | 0.00000 |
| HETATM | 29 | Pt | 4.43366  | 21.83112 | 14.99203 | Pt | 0 | 0 | 0.00000 |
| HETATM | 30 | Pt | 4.43366  | 10.66627 | 14.99203 | Pt | 0 | 0 | 0.00000 |
| HETATM | 31 | Pt | 14.10270 | 27.41355 | 14.99203 | Pt | 0 | 0 | 0.00000 |
| HETATM | 32 | Pt | 14.10270 | 16.24869 | 14.99203 | Pt | 0 | 0 | 0.00000 |
| HETATM | 33 | Pt | 6.85092  | 14.85309 | 14.99203 | Pt | 0 | 0 | 0.00000 |
| HETATM | 34 | Pt | 6.85092  | 26.01794 | 14.99203 | Pt | 0 | 0 | 0.00000 |
| HETATM | 35 | Pt | 16.51996 | 20.43552 | 14.99203 | Pt | 0 | 0 | 0.00000 |
| HETATM | 36 | Pt | 16.51996 | 31.60037 | 14.99203 | Pt | 0 | 0 | 0.00000 |
| HETATM | 37 | Pt | 6.85092  | 17.64430 | 14.99203 | Pt | 0 | 0 | 0.00000 |
| HETATM | 38 | Pt | 6.85092  | 6.47945  | 14.99203 | Pt | 0 | 0 | 0.00000 |
| HETATM | 39 | Pt | 16.51996 | 23.22672 | 14.99203 | Pt | 0 | 0 | 0.00000 |
| HETATM | 40 | Pt | 16.51996 | 12.06188 | 14.99203 | Pt | 0 | 0 | 0.00000 |
| HETATM | 41 | Pt | 6.85092  | 20.43552 | 14.99203 | Pt | 0 | 0 | 0.00000 |
| HETATM | 42 | Pt | 6.85092  | 9.27067  | 14.99203 | Pt | 0 | 0 | 0.00000 |
| HETATM | 43 | Pt | 16.51996 | 26.01795 | 14.99203 | Pt | 0 | 0 | 0.00000 |
| HETATM | 44 | Pt | 16.51996 | 14.85310 | 14.99203 | Pt | 0 | 0 | 0.00000 |
| HETATM | 45 | Pt | 6.85092  | 23.22673 | 14.99203 | Pt | 0 | 0 | 0.00000 |
| HETATM | 46 | Pt | 6.85092  | 12.06188 | 14.99203 | Pt | 0 | 0 | 0.00000 |
| HETATM | 47 | Pt | 16.51996 | 28.80916 | 14.99203 | Pt | 0 | 0 | 0.00000 |
| HETATM | 48 | Pt | 16.51996 | 17.64431 | 14.99203 | Pt | 0 | 0 | 0.00000 |
| HETATM | 49 | Pt | 9.26818  | 16.24870 | 14.99203 | Pt | 0 | 0 | 0.00000 |
| HETATM | 50 | Pt | 9.26818  | 27.41355 | 14.99203 | Pt | 0 | 0 | 0.00000 |
| HETATM | 51 | Pt | 18.93722 | 21.83113 | 14.99203 | Pt | 0 | 0 | 0.00000 |
| HETATM | 52 | Pt | 18.93722 | 32.99597 | 14.99203 | Pt | 0 | 0 | 0.00000 |
| HETATM | 53 | Pt | 9.26818  | 19.03991 | 14.99203 | Pt | 0 | 0 | 0.00000 |
| HETATM | 54 | Pt | 9.26818  | 7.87506  | 14.99203 | Pt | 0 | 0 | 0.00000 |
| HETATM | 55 | Pt | 18.93722 | 24.62234 | 14.99203 | Pt | 0 | 0 | 0.00000 |
| HETATM | 56 | Pt | 18.93722 | 13.45748 | 14.99203 | Pt | 0 | 0 | 0.00000 |
| HETATM | 57 | Pt | 9.26818  | 21.83112 | 14.99203 | Pt | 0 | 0 | 0.00000 |
| HETATM | 58 | Pt | 9.26818  | 10.66627 | 14.99203 | Pt | 0 | 0 | 0.00000 |
| HETATM | 59 | Pt | 18.93722 | 27.41355 | 14.99203 | Pt | 0 | 0 | 0.00000 |
| HETATM | 60 | Pt | 18.93722 | 16.24869 | 14.99203 | Pt | 0 | 0 | 0.00000 |
| HETATM | 61 | Pt | 9.26818  | 24.62233 | 14.99203 | Pt | 0 | 0 | 0.00000 |
| HETATM | 62 | Pt | 9.26818  | 13.45748 | 14.99203 | Pt | 0 | 0 | 0.00000 |
| HETATM | 63 | Pt | 18.93722 | 30.20476 | 14.99203 | Pt | 0 | 0 | 0.00000 |
| HETATM | 64 | Pt | 18.93722 | 19.03990 | 14.99203 | Pt | 0 | 0 | 0.00000 |
| HETATM | 65 | Pt | 2.82215  | 13.45749 | 17.27105 | Pt | 0 | 0 | 0.00000 |
| HETATM | 66 | Pt | 2.82215  | 2.29264  | 17.27105 | Pt | 0 | 0 | 0.00000 |
| HETATM | 67 | Pt | 12.49119 | 19.03992 | 17.27105 | Pt | 0 | 0 | 0.00000 |
| HETATM | 68 | Pt | 12.49119 | 7.87506  | 17.27105 | Pt | 0 | 0 | 0.00000 |
| HETATM | 69 | Pt | 2.82215  | 16.24870 | 17.27105 | Pt | 0 | 0 | 0.00000 |
| HETATM | 70 | Pt | 2.82215  | 5.08385  | 17.27105 | Pt | 0 | 0 | 0.00000 |
| HETATM | 71 | Pt | 12.49119 | 21.83113 | 17.27105 | Pt | 0 | 0 | 0.00000 |
| HETATM | 72 | Pt | 12.49119 | 10.66627 | 17.27105 | Pt | 0 | 0 | 0.00000 |
| HETATM | 73 | Pt | 2.82215  | 19.03991 | 17.27105 | Pt | 0 | 0 | 0.00000 |
| HETATM | 74 | Pt | 2.82215  | 7.87506  | 17.27105 | Pt | 0 | 0 | 0.00000 |
| HETATM | 75 | Pt | 12.49119 | 24.62234 | 17.27105 | Pt | 0 | 0 | 0.00000 |
| HETATM | 76 | Pt | 12.49119 | 13.45748 | 17.27105 | Pt | 0 | 0 | 0.00000 |
| HETATM | 77 | Pt | 2.82215  | 21.83112 | 17.27105 | Pt | 0 | 0 | 0.00000 |
| HETATM | 78 | Pt | 2.82215  | 10.66627 | 17.27105 | Pt | 0 | 0 | 0.00000 |



|        |     |    |          |          |          |    |   |   |         |
|--------|-----|----|----------|----------|----------|----|---|---|---------|
| HETATM | 79  | Pt | 12.49119 | 27.41355 | 17.27105 | Pt | 0 | 0 | 0.00000 |
| HETATM | 80  | Pt | 12.49119 | 16.24869 | 17.27105 | Pt | 0 | 0 | 0.00000 |
| HETATM | 81  | Pt | 5.23941  | 14.85309 | 17.27105 | Pt | 0 | 0 | 0.00000 |
| HETATM | 82  | Pt | 5.23941  | 3.68824  | 17.27105 | Pt | 0 | 0 | 0.00000 |
| HETATM | 83  | Pt | 14.90845 | 20.43552 | 17.27105 | Pt | 0 | 0 | 0.00000 |
| HETATM | 84  | Pt | 14.90845 | 9.27067  | 17.27105 | Pt | 0 | 0 | 0.00000 |
| HETATM | 85  | Pt | 5.23941  | 17.64430 | 17.27105 | Pt | 0 | 0 | 0.00000 |
| HETATM | 86  | Pt | 5.23941  | 6.47945  | 17.27105 | Pt | 0 | 0 | 0.00000 |
| HETATM | 87  | Pt | 14.90845 | 23.22672 | 17.27105 | Pt | 0 | 0 | 0.00000 |
| HETATM | 88  | Pt | 14.90845 | 12.06188 | 17.27105 | Pt | 0 | 0 | 0.00000 |
| HETATM | 89  | Pt | 5.23941  | 20.43552 | 17.27105 | Pt | 0 | 0 | 0.00000 |
| HETATM | 90  | Pt | 5.23941  | 9.27067  | 17.27105 | Pt | 0 | 0 | 0.00000 |
| HETATM | 91  | Pt | 14.90845 | 26.01795 | 17.27105 | Pt | 0 | 0 | 0.00000 |
| HETATM | 92  | Pt | 14.90845 | 14.85310 | 17.27105 | Pt | 0 | 0 | 0.00000 |
| HETATM | 93  | Pt | 5.23941  | 23.22673 | 17.27105 | Pt | 0 | 0 | 0.00000 |
| HETATM | 94  | Pt | 5.23941  | 12.06188 | 17.27105 | Pt | 0 | 0 | 0.00000 |
| HETATM | 95  | Pt | 14.90845 | 28.80916 | 17.27105 | Pt | 0 | 0 | 0.00000 |
| HETATM | 96  | Pt | 14.90845 | 17.64431 | 17.27105 | Pt | 0 | 0 | 0.00000 |
| HETATM | 97  | Pt | 7.65667  | 16.24870 | 17.27105 | Pt | 0 | 0 | 0.00000 |
| HETATM | 98  | Pt | 7.65667  | 5.08385  | 17.27105 | Pt | 0 | 0 | 0.00000 |
| HETATM | 99  | Pt | 17.32571 | 21.83113 | 17.27105 | Pt | 0 | 0 | 0.00000 |
| HETATM | 100 | Pt | 17.32571 | 10.66627 | 17.27105 | Pt | 0 | 0 | 0.00000 |
| HETATM | 101 | Pt | 7.65667  | 19.03991 | 17.27105 | Pt | 0 | 0 | 0.00000 |
| HETATM | 102 | Pt | 7.65667  | 7.87506  | 17.27105 | Pt | 0 | 0 | 0.00000 |
| HETATM | 103 | Pt | 17.32571 | 24.62234 | 17.27105 | Pt | 0 | 0 | 0.00000 |
| HETATM | 104 | Pt | 17.32571 | 13.45748 | 17.27105 | Pt | 0 | 0 | 0.00000 |
| HETATM | 105 | Pt | 7.65667  | 21.83112 | 17.27105 | Pt | 0 | 0 | 0.00000 |
| HETATM | 106 | Pt | 7.65667  | 10.66627 | 17.27105 | Pt | 0 | 0 | 0.00000 |
| HETATM | 107 | Pt | 17.32571 | 27.41355 | 17.27105 | Pt | 0 | 0 | 0.00000 |
| HETATM | 108 | Pt | 17.32571 | 16.24869 | 17.27105 | Pt | 0 | 0 | 0.00000 |
| HETATM | 109 | Pt | 7.65667  | 24.62233 | 17.27105 | Pt | 0 | 0 | 0.00000 |
| HETATM | 110 | Pt | 7.65667  | 13.45748 | 17.27105 | Pt | 0 | 0 | 0.00000 |
| HETATM | 111 | Pt | 17.32571 | 30.20476 | 17.27105 | Pt | 0 | 0 | 0.00000 |
| HETATM | 112 | Pt | 17.32571 | 19.03990 | 17.27105 | Pt | 0 | 0 | 0.00000 |
| HETATM | 113 | Pt | 10.07394 | 17.64430 | 17.27105 | Pt | 0 | 0 | 0.00000 |
| HETATM | 114 | Pt | 10.07394 | 6.47945  | 17.27105 | Pt | 0 | 0 | 0.00000 |
| HETATM | 115 | Pt | 0.40489  | 12.06187 | 17.27105 | Pt | 0 | 0 | 0.00000 |
| HETATM | 116 | Pt | 0.40489  | 0.89703  | 17.27105 | Pt | 0 | 0 | 0.00000 |
| HETATM | 117 | Pt | 10.07394 | 20.43552 | 17.27105 | Pt | 0 | 0 | 0.00000 |
| HETATM | 118 | Pt | 10.07394 | 9.27067  | 17.27105 | Pt | 0 | 0 | 0.00000 |
| HETATM | 119 | Pt | 0.40489  | 14.85310 | 17.27105 | Pt | 0 | 0 | 0.00000 |
| HETATM | 120 | Pt | 0.40489  | 3.68825  | 17.27105 | Pt | 0 | 0 | 0.00000 |
| HETATM | 121 | Pt | 10.07394 | 23.22673 | 17.27105 | Pt | 0 | 0 | 0.00000 |
| HETATM | 122 | Pt | 10.07394 | 12.06188 | 17.27105 | Pt | 0 | 0 | 0.00000 |
| HETATM | 123 | Pt | 0.40489  | 17.64431 | 17.27105 | Pt | 0 | 0 | 0.00000 |
| HETATM | 124 | Pt | 0.40489  | 6.47946  | 17.27105 | Pt | 0 | 0 | 0.00000 |
| HETATM | 125 | Pt | 10.07394 | 26.01794 | 17.27105 | Pt | 0 | 0 | 0.00000 |
| HETATM | 126 | Pt | 10.07394 | 14.85309 | 17.27105 | Pt | 0 | 0 | 0.00000 |
| HETATM | 127 | Pt | 0.40489  | 20.43552 | 17.27105 | Pt | 0 | 0 | 0.00000 |
| HETATM | 128 | Pt | 0.40489  | 9.27067  | 17.27105 | Pt | 0 | 0 | 0.00000 |
| HETATM | 129 | Pt | 3.62776  | 14.85278 | 19.55100 | Pt | 0 | 0 | 0.00000 |
| HETATM | 130 | Pt | 3.62770  | 3.68794  | 19.55062 | Pt | 0 | 0 | 0.00000 |
| HETATM | 131 | Pt | 13.29677 | 20.43517 | 19.55082 | Pt | 0 | 0 | 0.00000 |
| HETATM | 132 | Pt | 13.29676 | 9.27109  | 19.55083 | Pt | 0 | 0 | 0.00000 |
| HETATM | 133 | Pt | 3.62806  | 17.64411 | 19.54934 | Pt | 0 | 0 | 0.00000 |
| HETATM | 134 | Pt | 3.62797  | 6.47929  | 19.54913 | Pt | 0 | 0 | 0.00000 |
| HETATM | 135 | Pt | 13.29697 | 23.22645 | 19.54918 | Pt | 0 | 0 | 0.00000 |
| HETATM | 136 | Pt | 13.29666 | 12.06173 | 19.55114 | Pt | 0 | 0 | 0.00000 |
| HETATM | 137 | Pt | 3.62795  | 20.43571 | 19.54931 | Pt | 0 | 0 | 0.00000 |
| HETATM | 138 | Pt | 3.62794  | 9.27091  | 19.54932 | Pt | 0 | 0 | 0.00000 |
| HETATM | 139 | Pt | 13.29692 | 26.01790 | 19.54864 | Pt | 0 | 0 | 0.00000 |
| HETATM | 140 | Pt | 13.29708 | 14.85306 | 19.54999 | Pt | 0 | 0 | 0.00000 |
| HETATM | 141 | Pt | 3.62761  | 23.22699 | 19.55078 | Pt | 0 | 0 | 0.00000 |

|        |     |    |          |          |          |    |   |   |         |
|--------|-----|----|----------|----------|----------|----|---|---|---------|
| HETATM | 142 | Pt | 3.62770  | 12.06216 | 19.55101 | Pt | 0 | 0 | 0.00000 |
| HETATM | 143 | Pt | 13.29711 | 28.80946 | 19.54901 | Pt | 0 | 0 | 0.00000 |
| HETATM | 144 | Pt | 13.29679 | 17.64448 | 19.55098 | Pt | 0 | 0 | 0.00000 |
| HETATM | 145 | Pt | 6.04509  | 16.24857 | 19.54949 | Pt | 0 | 0 | 0.00000 |
| HETATM | 146 | Pt | 6.04508  | 5.08389  | 19.54912 | Pt | 0 | 0 | 0.00000 |
| HETATM | 147 | Pt | 15.71400 | 21.83107 | 19.54930 | Pt | 0 | 0 | 0.00000 |
| HETATM | 148 | Pt | 15.71332 | 10.66631 | 19.55037 | Pt | 0 | 0 | 0.00000 |
| HETATM | 149 | Pt | 6.04522  | 19.03981 | 19.54895 | Pt | 0 | 0 | 0.00000 |
| HETATM | 150 | Pt | 6.04522  | 7.87518  | 19.54882 | Pt | 0 | 0 | 0.00000 |
| HETATM | 151 | Pt | 15.71424 | 24.62233 | 19.54884 | Pt | 0 | 0 | 0.00000 |
| HETATM | 152 | Pt | 15.71382 | 13.45746 | 19.54948 | Pt | 0 | 0 | 0.00000 |
| HETATM | 153 | Pt | 6.04490  | 21.83105 | 19.54929 | Pt | 0 | 0 | 0.00000 |
| HETATM | 154 | Pt | 6.04488  | 10.66642 | 19.54942 | Pt | 0 | 0 | 0.00000 |
| HETATM | 155 | Pt | 15.71438 | 27.41354 | 19.54875 | Pt | 0 | 0 | 0.00000 |
| HETATM | 156 | Pt | 15.71396 | 16.24873 | 19.54940 | Pt | 0 | 0 | 0.00000 |
| HETATM | 157 | Pt | 6.04440  | 24.62224 | 19.55016 | Pt | 0 | 0 | 0.00000 |
| HETATM | 158 | Pt | 6.04441  | 13.45756 | 19.55051 | Pt | 0 | 0 | 0.00000 |
| HETATM | 159 | Pt | 15.71424 | 30.20483 | 19.54927 | Pt | 0 | 0 | 0.00000 |
| HETATM | 160 | Pt | 15.71356 | 19.03991 | 19.55038 | Pt | 0 | 0 | 0.00000 |
| HETATM | 161 | Pt | 8.46266  | 17.64424 | 19.54943 | Pt | 0 | 0 | 0.00000 |
| HETATM | 162 | Pt | 8.46271  | 6.47995  | 19.54897 | Pt | 0 | 0 | 0.00000 |
| HETATM | 163 | Pt | 18.13161 | 23.22688 | 19.54936 | Pt | 0 | 0 | 0.00000 |
| HETATM | 164 | Pt | 18.13096 | 12.06201 | 19.54963 | Pt | 0 | 0 | 0.00000 |
| HETATM | 165 | Pt | 8.46253  | 20.43515 | 19.54932 | Pt | 0 | 0 | 0.00000 |
| HETATM | 166 | Pt | 8.46253  | 9.27112  | 19.54933 | Pt | 0 | 0 | 0.00000 |
| HETATM | 167 | Pt | 18.13171 | 26.01776 | 19.54935 | Pt | 0 | 0 | 0.00000 |
| HETATM | 168 | Pt | 18.13144 | 14.85290 | 19.54928 | Pt | 0 | 0 | 0.00000 |
| HETATM | 169 | Pt | 8.46212  | 23.22624 | 19.54933 | Pt | 0 | 0 | 0.00000 |
| HETATM | 170 | Pt | 8.46208  | 12.06195 | 19.54977 | Pt | 0 | 0 | 0.00000 |
| HETATM | 171 | Pt | 18.13191 | 28.80887 | 19.54912 | Pt | 0 | 0 | 0.00000 |
| HETATM | 172 | Pt | 18.13125 | 17.64403 | 19.54939 | Pt | 0 | 0 | 0.00000 |
| HETATM | 173 | Pt | 8.46202  | 26.01790 | 19.54885 | Pt | 0 | 0 | 0.00000 |
| HETATM | 174 | Pt | 8.46248  | 14.85304 | 19.55000 | Pt | 0 | 0 | 0.00000 |
| HETATM | 175 | Pt | 18.13129 | 31.60072 | 19.54943 | Pt | 0 | 0 | 0.00000 |
| HETATM | 176 | Pt | 18.13128 | 20.43583 | 19.54944 | Pt | 0 | 0 | 0.00000 |
| HETATM | 177 | Pt | 10.88005 | 19.03964 | 19.55098 | Pt | 0 | 0 | 0.00000 |
| HETATM | 178 | Pt | 10.88012 | 7.87599  | 19.55008 | Pt | 0 | 0 | 0.00000 |
| HETATM | 179 | Pt | 1.21098  | 13.45746 | 19.55098 | Pt | 0 | 0 | 0.00000 |
| HETATM | 180 | Pt | 1.21072  | 2.29256  | 19.55078 | Pt | 0 | 0 | 0.00000 |
| HETATM | 181 | Pt | 10.87993 | 21.83030 | 19.55020 | Pt | 0 | 0 | 0.00000 |
| HETATM | 182 | Pt | 10.87985 | 10.66666 | 19.55111 | Pt | 0 | 0 | 0.00000 |
| HETATM | 183 | Pt | 1.21116  | 16.24808 | 19.55037 | Pt | 0 | 0 | 0.00000 |
| HETATM | 184 | Pt | 1.21091  | 5.08329  | 19.55017 | Pt | 0 | 0 | 0.00000 |
| HETATM | 185 | Pt | 10.87972 | 24.62193 | 19.54893 | Pt | 0 | 0 | 0.00000 |
| HETATM | 186 | Pt | 10.88019 | 13.45725 | 19.55084 | Pt | 0 | 0 | 0.00000 |
| HETATM | 187 | Pt | 1.21104  | 19.03999 | 19.54951 | Pt | 0 | 0 | 0.00000 |
| HETATM | 188 | Pt | 1.21094  | 7.87508  | 19.54937 | Pt | 0 | 0 | 0.00000 |
| HETATM | 189 | Pt | 10.87981 | 27.41386 | 19.54893 | Pt | 0 | 0 | 0.00000 |
| HETATM | 190 | Pt | 10.88027 | 16.24882 | 19.55086 | Pt | 0 | 0 | 0.00000 |
| HETATM | 191 | Pt | 1.21085  | 21.83174 | 19.55026 | Pt | 0 | 0 | 0.00000 |
| HETATM | 192 | Pt | 1.21093  | 10.66684 | 19.55042 | Pt | 0 | 0 | 0.00000 |
| HETATM | 193 | Pt | 2.01697  | 12.06294 | 21.83241 | Pt | 0 | 0 | 0.00000 |
| HETATM | 194 | Pt | 2.01696  | 23.22795 | 21.83212 | Pt | 0 | 0 | 0.00000 |
| HETATM | 195 | Pt | 11.68611 | 17.64512 | 21.83263 | Pt | 0 | 0 | 0.00000 |
| HETATM | 196 | Pt | 11.68604 | 28.81021 | 21.82730 | Pt | 0 | 0 | 0.00000 |
| HETATM | 197 | Pt | 2.01701  | 14.85187 | 21.83253 | Pt | 0 | 0 | 0.00000 |
| HETATM | 198 | Pt | 2.01704  | 3.68703  | 21.83167 | Pt | 0 | 0 | 0.00000 |
| HETATM | 199 | Pt | 11.68605 | 20.43431 | 21.83212 | Pt | 0 | 0 | 0.00000 |
| HETATM | 200 | Pt | 11.68605 | 9.27206  | 21.83215 | Pt | 0 | 0 | 0.00000 |
| HETATM | 201 | Pt | 2.01701  | 17.64363 | 21.82808 | Pt | 0 | 0 | 0.00000 |
| HETATM | 202 | Pt | 2.01698  | 6.47864  | 21.82781 | Pt | 0 | 0 | 0.00000 |
| HETATM | 203 | Pt | 11.68594 | 23.22565 | 21.82761 | Pt | 0 | 0 | 0.00000 |
| HETATM | 204 | Pt | 11.68602 | 12.06104 | 21.83298 | Pt | 0 | 0 | 0.00000 |

|        |     |    |          |          |          |    |   |   |         |
|--------|-----|----|----------|----------|----------|----|---|---|---------|
| HETATM | 205 | Pt | 2.01695  | 20.43646 | 21.82810 | Pt | 0 | 0 | 0.00000 |
| HETATM | 206 | Pt | 2.01692  | 9.27137  | 21.82813 | Pt | 0 | 0 | 0.00000 |
| HETATM | 207 | Pt | 11.68518 | 26.01788 | 21.82619 | Pt | 0 | 0 | 0.00000 |
| HETATM | 208 | Pt | 11.68680 | 14.85303 | 21.83000 | Pt | 0 | 0 | 0.00000 |
| HETATM | 209 | Pt | 4.43221  | 13.45744 | 21.83256 | Pt | 0 | 0 | 0.00000 |
| HETATM | 210 | Pt | 4.43230  | 24.62233 | 21.83189 | Pt | 0 | 0 | 0.00000 |
| HETATM | 211 | Pt | 14.10137 | 19.03995 | 21.83216 | Pt | 0 | 0 | 0.00000 |
| HETATM | 212 | Pt | 14.10274 | 30.20491 | 21.82813 | Pt | 0 | 0 | 0.00000 |
| HETATM | 213 | Pt | 4.43359  | 16.24857 | 21.82860 | Pt | 0 | 0 | 0.00000 |
| HETATM | 214 | Pt | 4.43367  | 5.08368  | 21.82793 | Pt | 0 | 0 | 0.00000 |
| HETATM | 215 | Pt | 14.10259 | 21.83103 | 21.82839 | Pt | 0 | 0 | 0.00000 |
| HETATM | 216 | Pt | 14.10122 | 10.66628 | 21.83242 | Pt | 0 | 0 | 0.00000 |
| HETATM | 217 | Pt | 4.43370  | 19.04005 | 21.82675 | Pt | 0 | 0 | 0.00000 |
| HETATM | 218 | Pt | 4.43366  | 7.87496  | 21.82658 | Pt | 0 | 0 | 0.00000 |
| HETATM | 219 | Pt | 14.10259 | 24.62238 | 21.82639 | Pt | 0 | 0 | 0.00000 |
| HETATM | 220 | Pt | 14.10260 | 13.45730 | 21.82919 | Pt | 0 | 0 | 0.00000 |
| HETATM | 221 | Pt | 4.43350  | 21.83138 | 21.82846 | Pt | 0 | 0 | 0.00000 |
| HETATM | 222 | Pt | 4.43351  | 10.66628 | 21.82867 | Pt | 0 | 0 | 0.00000 |
| HETATM | 223 | Pt | 14.10269 | 27.41346 | 21.82605 | Pt | 0 | 0 | 0.00000 |
| HETATM | 224 | Pt | 14.10270 | 16.24887 | 21.82884 | Pt | 0 | 0 | 0.00000 |
| HETATM | 225 | Pt | 6.85021  | 14.85311 | 21.82855 | Pt | 0 | 0 | 0.00000 |
| HETATM | 226 | Pt | 6.84969  | 26.01795 | 21.82762 | Pt | 0 | 0 | 0.00000 |
| HETATM | 227 | Pt | 16.51898 | 20.43563 | 21.82816 | Pt | 0 | 0 | 0.00000 |
| HETATM | 228 | Pt | 16.51898 | 31.60046 | 21.82811 | Pt | 0 | 0 | 0.00000 |
| HETATM | 229 | Pt | 6.85097  | 17.64433 | 21.82700 | Pt | 0 | 0 | 0.00000 |
| HETATM | 230 | Pt | 6.85131  | 6.47957  | 21.82645 | Pt | 0 | 0 | 0.00000 |
| HETATM | 231 | Pt | 16.51991 | 23.22675 | 21.82682 | Pt | 0 | 0 | 0.00000 |
| HETATM | 232 | Pt | 16.51851 | 12.06187 | 21.82831 | Pt | 0 | 0 | 0.00000 |
| HETATM | 233 | Pt | 6.85089  | 20.43553 | 21.82683 | Pt | 0 | 0 | 0.00000 |
| HETATM | 234 | Pt | 6.85088  | 9.27057  | 21.82685 | Pt | 0 | 0 | 0.00000 |
| HETATM | 235 | Pt | 16.51988 | 26.01797 | 21.82667 | Pt | 0 | 0 | 0.00000 |
| HETATM | 236 | Pt | 16.51997 | 14.85313 | 21.82700 | Pt | 0 | 0 | 0.00000 |
| HETATM | 237 | Pt | 6.84986  | 23.22662 | 21.82793 | Pt | 0 | 0 | 0.00000 |
| HETATM | 238 | Pt | 6.84951  | 12.06184 | 21.82845 | Pt | 0 | 0 | 0.00000 |
| HETATM | 239 | Pt | 16.52042 | 28.80902 | 21.82658 | Pt | 0 | 0 | 0.00000 |
| HETATM | 240 | Pt | 16.51903 | 17.64421 | 21.82814 | Pt | 0 | 0 | 0.00000 |
| HETATM | 241 | Pt | 9.26865  | 16.24949 | 21.82826 | Pt | 0 | 0 | 0.00000 |
| HETATM | 242 | Pt | 9.26796  | 27.41336 | 21.82588 | Pt | 0 | 0 | 0.00000 |
| HETATM | 243 | Pt | 18.93753 | 21.83198 | 21.82820 | Pt | 0 | 0 | 0.00000 |
| HETATM | 244 | Pt | 18.93767 | 32.99713 | 21.82777 | Pt | 0 | 0 | 0.00000 |
| HETATM | 245 | Pt | 9.26837  | 19.03985 | 21.82865 | Pt | 0 | 0 | 0.00000 |
| HETATM | 246 | Pt | 9.26880  | 7.87627  | 21.82760 | Pt | 0 | 0 | 0.00000 |
| HETATM | 247 | Pt | 18.93727 | 24.62230 | 21.82865 | Pt | 0 | 0 | 0.00000 |
| HETATM | 248 | Pt | 18.93704 | 13.45727 | 21.82843 | Pt | 0 | 0 | 0.00000 |
| HETATM | 249 | Pt | 9.26844  | 21.83018 | 21.82787 | Pt | 0 | 0 | 0.00000 |
| HETATM | 250 | Pt | 9.26800  | 10.66659 | 21.82896 | Pt | 0 | 0 | 0.00000 |
| HETATM | 251 | Pt | 18.93787 | 27.41246 | 21.82806 | Pt | 0 | 0 | 0.00000 |
| HETATM | 252 | Pt | 18.93762 | 16.24778 | 21.82784 | Pt | 0 | 0 | 0.00000 |
| HETATM | 253 | Pt | 9.26803  | 24.62226 | 21.82565 | Pt | 0 | 0 | 0.00000 |
| HETATM | 254 | Pt | 9.26875  | 13.45641 | 21.82798 | Pt | 0 | 0 | 0.00000 |
| HETATM | 255 | Pt | 18.93711 | 30.20506 | 21.82614 | Pt | 0 | 0 | 0.00000 |
| HETATM | 256 | Pt | 18.93718 | 19.03990 | 21.82576 | Pt | 0 | 0 | 0.00000 |
| HETATM | 257 | Pt | 2.82181  | 13.45732 | 24.12207 | Pt | 0 | 0 | 0.00000 |
| HETATM | 258 | Pt | 2.82253  | 2.29278  | 24.12108 | Pt | 0 | 0 | 0.00000 |
| HETATM | 259 | Pt | 12.49110 | 19.04054 | 24.12145 | Pt | 0 | 0 | 0.00000 |
| HETATM | 260 | Pt | 12.49293 | 7.87676  | 24.10928 | Pt | 0 | 0 | 0.00000 |
| HETATM | 261 | Pt | 2.82354  | 16.24659 | 24.10991 | Pt | 0 | 0 | 0.00000 |
| HETATM | 262 | Pt | 2.82426  | 5.08147  | 24.10891 | Pt | 0 | 0 | 0.00000 |
| HETATM | 263 | Pt | 12.49304 | 21.82946 | 24.10960 | Pt | 0 | 0 | 0.00000 |
| HETATM | 264 | Pt | 12.49124 | 10.66568 | 24.12187 | Pt | 0 | 0 | 0.00000 |
| HETATM | 265 | Pt | 2.82095  | 19.04020 | 24.10442 | Pt | 0 | 0 | 0.00000 |
| HETATM | 266 | Pt | 2.82096  | 7.87479  | 24.10451 | Pt | 0 | 0 | 0.00000 |
| HETATM | 267 | Pt | 12.49032 | 24.62228 | 24.10373 | Pt | 0 | 0 | 0.00000 |

|        |     |    |          |          |          |    |   |   |         |
|--------|-----|----|----------|----------|----------|----|---|---|---------|
| HETATM | 268 | Pt | 12.49256 | 13.45532 | 24.11109 | Pt | 0 | 0 | 0.00000 |
| HETATM | 269 | Pt | 2.82393  | 21.83364 | 24.10985 | Pt | 0 | 0 | 0.00000 |
| HETATM | 270 | Pt | 2.82391  | 10.66824 | 24.10985 | Pt | 0 | 0 | 0.00000 |
| HETATM | 271 | Pt | 12.49041 | 27.41358 | 24.10324 | Pt | 0 | 0 | 0.00000 |
| HETATM | 272 | Pt | 12.49264 | 16.25083 | 24.11056 | Pt | 0 | 0 | 0.00000 |
| HETATM | 273 | Pt | 5.23628  | 14.85363 | 24.10992 | Pt | 0 | 0 | 0.00000 |
| HETATM | 274 | Pt | 5.23675  | 3.68876  | 24.10924 | Pt | 0 | 0 | 0.00000 |
| HETATM | 275 | Pt | 14.90555 | 20.43632 | 24.10970 | Pt | 0 | 0 | 0.00000 |
| HETATM | 276 | Pt | 14.90554 | 9.26978  | 24.10966 | Pt | 0 | 0 | 0.00000 |
| HETATM | 277 | Pt | 5.23940  | 17.64520 | 24.10453 | Pt | 0 | 0 | 0.00000 |
| HETATM | 278 | Pt | 5.23965  | 6.47951  | 24.10385 | Pt | 0 | 0 | 0.00000 |
| HETATM | 279 | Pt | 14.90864 | 23.22744 | 24.10445 | Pt | 0 | 0 | 0.00000 |
| HETATM | 280 | Pt | 14.90580 | 12.06205 | 24.11057 | Pt | 0 | 0 | 0.00000 |
| HETATM | 281 | Pt | 5.23963  | 20.43556 | 24.10459 | Pt | 0 | 0 | 0.00000 |
| HETATM | 282 | Pt | 5.23963  | 9.26947  | 24.10465 | Pt | 0 | 0 | 0.00000 |
| HETATM | 283 | Pt | 14.90793 | 26.01806 | 24.10409 | Pt | 0 | 0 | 0.00000 |
| HETATM | 284 | Pt | 14.90936 | 14.85322 | 24.10519 | Pt | 0 | 0 | 0.00000 |
| HETATM | 285 | Pt | 5.23675  | 23.22669 | 24.10966 | Pt | 0 | 0 | 0.00000 |
| HETATM | 286 | Pt | 5.23649  | 12.06097 | 24.11033 | Pt | 0 | 0 | 0.00000 |
| HETATM | 287 | Pt | 14.90846 | 28.80838 | 24.10359 | Pt | 0 | 0 | 0.00000 |
| HETATM | 288 | Pt | 14.90560 | 17.64411 | 24.10975 | Pt | 0 | 0 | 0.00000 |
| HETATM | 289 | Pt | 7.65688  | 16.24814 | 24.10528 | Pt | 0 | 0 | 0.00000 |
| HETATM | 290 | Pt | 7.65673  | 5.08281  | 24.10422 | Pt | 0 | 0 | 0.00000 |
| HETATM | 291 | Pt | 17.32618 | 21.83017 | 24.10482 | Pt | 0 | 0 | 0.00000 |
| HETATM | 292 | Pt | 17.32791 | 10.66571 | 24.10313 | Pt | 0 | 0 | 0.00000 |
| HETATM | 293 | Pt | 7.65609  | 19.04042 | 24.10480 | Pt | 0 | 0 | 0.00000 |
| HETATM | 294 | Pt | 7.65720  | 7.87402  | 24.10428 | Pt | 0 | 0 | 0.00000 |
| HETATM | 295 | Pt | 17.32474 | 24.62233 | 24.10468 | Pt | 0 | 0 | 0.00000 |
| HETATM | 296 | Pt | 17.32564 | 13.45699 | 24.10473 | Pt | 0 | 0 | 0.00000 |
| HETATM | 297 | Pt | 7.65725  | 21.83265 | 24.10453 | Pt | 0 | 0 | 0.00000 |
| HETATM | 298 | Pt | 7.65611  | 10.66627 | 24.10504 | Pt | 0 | 0 | 0.00000 |
| HETATM | 299 | Pt | 17.32580 | 27.41408 | 24.10449 | Pt | 0 | 0 | 0.00000 |
| HETATM | 300 | Pt | 17.32673 | 16.24974 | 24.10461 | Pt | 0 | 0 | 0.00000 |
| HETATM | 301 | Pt | 7.65823  | 24.62280 | 24.10280 | Pt | 0 | 0 | 0.00000 |
| HETATM | 302 | Pt | 7.65849  | 13.45746 | 24.10371 | Pt | 0 | 0 | 0.00000 |
| HETATM | 303 | Pt | 17.32534 | 30.20525 | 24.10487 | Pt | 0 | 0 | 0.00000 |
| HETATM | 304 | Pt | 17.32699 | 19.03999 | 24.10342 | Pt | 0 | 0 | 0.00000 |
| HETATM | 305 | Pt | 10.07488 | 17.64762 | 24.11045 | Pt | 0 | 0 | 0.00000 |
| HETATM | 306 | Pt | 10.07313 | 6.47768  | 24.10180 | Pt | 0 | 0 | 0.00000 |
| HETATM | 307 | Pt | 0.40561  | 12.06454 | 24.10990 | Pt | 0 | 0 | 0.00000 |
| HETATM | 308 | Pt | 0.40629  | 0.89991  | 24.11009 | Pt | 0 | 0 | 0.00000 |
| HETATM | 309 | Pt | 10.07489 | 20.43360 | 24.10963 | Pt | 0 | 0 | 0.00000 |
| HETATM | 310 | Pt | 10.07489 | 9.27265  | 24.10967 | Pt | 0 | 0 | 0.00000 |
| HETATM | 311 | Pt | 0.40530  | 14.85034 | 24.11022 | Pt | 0 | 0 | 0.00000 |
| HETATM | 312 | Pt | 0.40643  | 3.68550  | 24.10895 | Pt | 0 | 0 | 0.00000 |
| HETATM | 313 | Pt | 10.07329 | 23.22841 | 24.10257 | Pt | 0 | 0 | 0.00000 |
| HETATM | 314 | Pt | 10.07509 | 12.05843 | 24.11125 | Pt | 0 | 0 | 0.00000 |
| HETATM | 315 | Pt | 0.40382  | 17.64556 | 24.10294 | Pt | 0 | 0 | 0.00000 |
| HETATM | 316 | Pt | 0.40443  | 6.48052  | 24.10308 | Pt | 0 | 0 | 0.00000 |
| HETATM | 317 | Pt | 10.07400 | 26.01799 | 24.10440 | Pt | 0 | 0 | 0.00000 |
| HETATM | 318 | Pt | 10.07258 | 14.85310 | 24.10234 | Pt | 0 | 0 | 0.00000 |
| HETATM | 319 | Pt | 0.40425  | 20.43443 | 24.10343 | Pt | 0 | 0 | 0.00000 |
| HETATM | 320 | Pt | 0.40417  | 9.26949  | 24.10343 | Pt | 0 | 0 | 0.00000 |
| HETATM | 321 | Pt | 3.62530  | 14.85123 | 26.41109 | Pt | 0 | 0 | 0.00000 |
| HETATM | 322 | Pt | 3.62794  | 3.68641  | 26.41017 | Pt | 0 | 0 | 0.00000 |
| HETATM | 323 | Pt | 13.29577 | 20.43584 | 26.41080 | Pt | 0 | 0 | 0.00000 |
| HETATM | 324 | Pt | 13.29572 | 9.26986  | 26.41091 | Pt | 0 | 0 | 0.00000 |
| HETATM | 325 | Pt | 3.62536  | 17.64725 | 26.38060 | Pt | 0 | 0 | 0.00000 |
| HETATM | 326 | Pt | 3.62622  | 6.48111  | 26.38031 | Pt | 0 | 0 | 0.00000 |
| HETATM | 327 | Pt | 13.29483 | 23.23171 | 26.38077 | Pt | 0 | 0 | 0.00000 |
| HETATM | 328 | Pt | 13.29606 | 12.05739 | 26.41114 | Pt | 0 | 0 | 0.00000 |
| HETATM | 329 | Pt | 3.62591  | 20.43374 | 26.38080 | Pt | 0 | 0 | 0.00000 |
| HETATM | 330 | Pt | 3.62591  | 9.26746  | 26.38087 | Pt | 0 | 0 | 0.00000 |

|        |     |    |          |          |          |    |   |   |         |
|--------|-----|----|----------|----------|----------|----|---|---|---------|
| HETATM | 331 | Pt | 13.29594 | 26.01800 | 26.38112 | Pt | 0 | 0 | 0.00000 |
| HETATM | 332 | Pt | 13.29397 | 14.85320 | 26.38101 | Pt | 0 | 0 | 0.00000 |
| HETATM | 333 | Pt | 3.62720  | 23.22929 | 26.41073 | Pt | 0 | 0 | 0.00000 |
| HETATM | 334 | Pt | 3.62642  | 12.06332 | 26.41121 | Pt | 0 | 0 | 0.00000 |
| HETATM | 335 | Pt | 13.29462 | 28.80436 | 26.38002 | Pt | 0 | 0 | 0.00000 |
| HETATM | 336 | Pt | 13.29571 | 17.64896 | 26.41036 | Pt | 0 | 0 | 0.00000 |
| HETATM | 337 | Pt | 6.04658  | 16.24939 | 26.38089 | Pt | 0 | 0 | 0.00000 |
| HETATM | 338 | Pt | 6.04970  | 5.08343  | 26.38047 | Pt | 0 | 0 | 0.00000 |
| HETATM | 339 | Pt | 15.71692 | 21.83174 | 26.38097 | Pt | 0 | 0 | 0.00000 |
| HETATM | 340 | Pt | 15.72587 | 10.66402 | 26.37327 | Pt | 0 | 0 | 0.00000 |
| HETATM | 341 | Pt | 6.04485  | 19.04096 | 26.38263 | Pt | 0 | 0 | 0.00000 |
| HETATM | 342 | Pt | 6.04403  | 7.87271  | 26.38201 | Pt | 0 | 0 | 0.00000 |
| HETATM | 343 | Pt | 15.71331 | 24.62294 | 26.38257 | Pt | 0 | 0 | 0.00000 |
| HETATM | 344 | Pt | 15.71944 | 13.45767 | 26.38161 | Pt | 0 | 0 | 0.00000 |
| HETATM | 345 | Pt | 6.04841  | 21.83263 | 26.38088 | Pt | 0 | 0 | 0.00000 |
| HETATM | 346 | Pt | 6.04922  | 10.66444 | 26.38163 | Pt | 0 | 0 | 0.00000 |
| HETATM | 347 | Pt | 15.71199 | 27.41422 | 26.38182 | Pt | 0 | 0 | 0.00000 |
| HETATM | 348 | Pt | 15.71814 | 16.24983 | 26.38080 | Pt | 0 | 0 | 0.00000 |
| HETATM | 349 | Pt | 6.05780  | 24.62347 | 26.37313 | Pt | 0 | 0 | 0.00000 |
| HETATM | 350 | Pt | 6.05519  | 13.45758 | 26.37311 | Pt | 0 | 0 | 0.00000 |
| HETATM | 351 | Pt | 15.71691 | 30.20291 | 26.38062 | Pt | 0 | 0 | 0.00000 |
| HETATM | 352 | Pt | 15.72556 | 19.04091 | 26.37326 | Pt | 0 | 0 | 0.00000 |
| HETATM | 353 | Pt | 8.46081  | 17.64268 | 26.38152 | Pt | 0 | 0 | 0.00000 |
| HETATM | 354 | Pt | 8.46228  | 6.47738  | 26.38399 | Pt | 0 | 0 | 0.00000 |
| HETATM | 355 | Pt | 18.12956 | 23.22439 | 26.38114 | Pt | 0 | 0 | 0.00000 |
| HETATM | 356 | Pt | 18.13181 | 12.05893 | 26.38354 | Pt | 0 | 0 | 0.00000 |
| HETATM | 357 | Pt | 8.46126  | 20.43976 | 26.38087 | Pt | 0 | 0 | 0.00000 |
| HETATM | 358 | Pt | 8.46121  | 9.26474  | 26.38089 | Pt | 0 | 0 | 0.00000 |
| HETATM | 359 | Pt | 18.12758 | 26.02170 | 26.38138 | Pt | 0 | 0 | 0.00000 |
| HETATM | 360 | Pt | 18.13306 | 14.85678 | 26.38024 | Pt | 0 | 0 | 0.00000 |
| HETATM | 361 | Pt | 8.46295  | 23.22824 | 26.38713 | Pt | 0 | 0 | 0.00000 |
| HETATM | 362 | Pt | 8.46157  | 12.06301 | 26.38450 | Pt | 0 | 0 | 0.00000 |
| HETATM | 363 | Pt | 18.13010 | 28.80944 | 26.38484 | Pt | 0 | 0 | 0.00000 |
| HETATM | 364 | Pt | 18.13238 | 17.64514 | 26.38754 | Pt | 0 | 0 | 0.00000 |
| HETATM | 365 | Pt | 8.46527  | 26.01915 | 26.38516 | Pt | 0 | 0 | 0.00000 |
| HETATM | 366 | Pt | 8.45976  | 14.85441 | 26.39010 | Pt | 0 | 0 | 0.00000 |
| HETATM | 367 | Pt | 18.13161 | 31.59702 | 26.38764 | Pt | 0 | 0 | 0.00000 |
| HETATM | 368 | Pt | 18.13151 | 20.43575 | 26.38787 | Pt | 0 | 0 | 0.00000 |
| HETATM | 369 | Pt | 10.88192 | 19.04249 | 26.41079 | Pt | 0 | 0 | 0.00000 |
| HETATM | 370 | Pt | 10.87404 | 7.86252  | 26.37273 | Pt | 0 | 0 | 0.00000 |
| HETATM | 371 | Pt | 1.21160  | 13.45769 | 26.41130 | Pt | 0 | 0 | 0.00000 |
| HETATM | 372 | Pt | 1.21447  | 2.29288  | 26.41034 | Pt | 0 | 0 | 0.00000 |
| HETATM | 373 | Pt | 10.87416 | 21.84324 | 26.37305 | Pt | 0 | 0 | 0.00000 |
| HETATM | 374 | Pt | 10.88199 | 10.66321 | 26.41127 | Pt | 0 | 0 | 0.00000 |
| HETATM | 375 | Pt | 1.20358  | 16.25860 | 26.37349 | Pt | 0 | 0 | 0.00000 |
| HETATM | 376 | Pt | 1.20624  | 5.09385  | 26.37238 | Pt | 0 | 0 | 0.00000 |
| HETATM | 377 | Pt | 10.87947 | 24.62481 | 26.38454 | Pt | 0 | 0 | 0.00000 |
| HETATM | 378 | Pt | 10.87310 | 13.46520 | 26.37710 | Pt | 0 | 0 | 0.00000 |
| HETATM | 379 | Pt | 1.21068  | 19.03959 | 26.38712 | Pt | 0 | 0 | 0.00000 |
| HETATM | 380 | Pt | 1.21059  | 7.87502  | 26.38760 | Pt | 0 | 0 | 0.00000 |
| HETATM | 381 | Pt | 10.88021 | 27.41146 | 26.38372 | Pt | 0 | 0 | 0.00000 |
| HETATM | 382 | Pt | 10.87368 | 16.24124 | 26.37610 | Pt | 0 | 0 | 0.00000 |
| HETATM | 383 | Pt | 1.20469  | 21.82118 | 26.37396 | Pt | 0 | 0 | 0.00000 |
| HETATM | 384 | Pt | 1.20466  | 10.65645 | 26.37328 | Pt | 0 | 0 | 0.00000 |
| HETATM | 385 | Pt | 2.01836  | 12.06916 | 28.74588 | Pt | 0 | 0 | 0.00000 |
| HETATM | 386 | Pt | 2.02072  | 23.23397 | 28.74658 | Pt | 0 | 0 | 0.00000 |
| HETATM | 387 | Pt | 11.68959 | 17.65794 | 28.74604 | Pt | 0 | 0 | 0.00000 |
| HETATM | 388 | Pt | 11.69299 | 28.79146 | 28.68029 | Pt | 0 | 0 | 0.00000 |
| HETATM | 389 | Pt | 2.01743  | 14.84608 | 28.74677 | Pt | 0 | 0 | 0.00000 |
| HETATM | 390 | Pt | 2.02323  | 3.68138  | 28.74543 | Pt | 0 | 0 | 0.00000 |
| HETATM | 391 | Pt | 11.68972 | 20.43372 | 28.74616 | Pt | 0 | 0 | 0.00000 |
| HETATM | 392 | Pt | 11.68929 | 9.27166  | 28.74648 | Pt | 0 | 0 | 0.00000 |
| HETATM | 393 | Pt | 2.02230  | 17.65504 | 28.68155 | Pt | 0 | 0 | 0.00000 |

|                      |     |    |          |          |          |    |   |   |         |
|----------------------|-----|----|----------|----------|----------|----|---|---|---------|
| HETATM               | 394 | Pt | 2.02427  | 6.49113  | 28.68127 | Pt | 0 | 0 | 0.00000 |
| HETATM               | 395 | Pt | 11.69069 | 23.24491 | 28.68058 | Pt | 0 | 0 | 0.00000 |
| HETATM               | 396 | Pt | 11.68758 | 12.04829 | 28.74662 | Pt | 0 | 0 | 0.00000 |
| HETATM               | 397 | Pt | 2.02209  | 20.42417 | 28.68151 | Pt | 0 | 0 | 0.00000 |
| HETATM               | 398 | Pt | 2.02224  | 9.25924  | 28.68161 | Pt | 0 | 0 | 0.00000 |
| HETATM               | 399 | Pt | 11.68531 | 26.01796 | 28.66588 | Pt | 0 | 0 | 0.00000 |
| HETATM               | 400 | Pt | 11.69766 | 14.85296 | 28.69889 | Pt | 0 | 0 | 0.00000 |
| HETATM               | 401 | Pt | 4.42132  | 13.45795 | 28.74593 | Pt | 0 | 0 | 0.00000 |
| HETATM               | 402 | Pt | 4.42735  | 24.62326 | 28.74568 | Pt | 0 | 0 | 0.00000 |
| HETATM               | 403 | Pt | 14.09463 | 19.04529 | 28.74626 | Pt | 0 | 0 | 0.00000 |
| HETATM               | 404 | Pt | 14.11768 | 30.17308 | 28.64795 | Pt | 0 | 0 | 0.00000 |
| HETATM               | 405 | Pt | 4.44527  | 16.27441 | 28.64828 | Pt | 0 | 0 | 0.00000 |
| HETATM               | 406 | Pt | 4.45201  | 5.10844  | 28.64755 | Pt | 0 | 0 | 0.00000 |
| HETATM               | 407 | Pt | 14.11590 | 21.86166 | 28.64816 | Pt | 0 | 0 | 0.00000 |
| HETATM               | 408 | Pt | 14.09314 | 10.65955 | 28.74597 | Pt | 0 | 0 | 0.00000 |
| HETATM               | 409 | Pt | 4.43682  | 19.04077 | 28.66374 | Pt | 0 | 0 | 0.00000 |
| HETATM               | 410 | Pt | 4.43873  | 7.87302  | 28.66382 | Pt | 0 | 0 | 0.00000 |
| HETATM               | 411 | Pt | 14.10231 | 24.63145 | 28.66421 | Pt | 0 | 0 | 0.00000 |
| HETATM               | 412 | Pt | 14.11989 | 13.47415 | 28.64801 | Pt | 0 | 0 | 0.00000 |
| HETATM               | 413 | Pt | 4.44807  | 21.80726 | 28.64812 | Pt | 0 | 0 | 0.00000 |
| HETATM               | 414 | Pt | 4.44624  | 10.63957 | 28.64830 | Pt | 0 | 0 | 0.00000 |
| HETATM               | 415 | Pt | 14.10354 | 27.40547 | 28.66397 | Pt | 0 | 0 | 0.00000 |
| HETATM               | 416 | Pt | 14.12114 | 16.23351 | 28.64763 | Pt | 0 | 0 | 0.00000 |
| HETATM               | 417 | Pt | 6.85098  | 14.86671 | 28.68258 | Pt | 0 | 0 | 0.00000 |
| HETATM               | 418 | Pt | 6.86484  | 26.03129 | 28.68047 | Pt | 0 | 0 | 0.00000 |
| HETATM               | 419 | Pt | 16.52666 | 20.45008 | 28.68170 | Pt | 0 | 0 | 0.00000 |
| HETATM               | 420 | Pt | 16.52699 | 31.58033 | 28.68161 | Pt | 0 | 0 | 0.00000 |
| HETATM               | 421 | Pt | 6.84803  | 17.64889 | 28.66398 | Pt | 0 | 0 | 0.00000 |
| HETATM               | 422 | Pt | 6.85709  | 6.48116  | 28.66472 | Pt | 0 | 0 | 0.00000 |
| HETATM               | 423 | Pt | 16.51551 | 23.23421 | 28.66420 | Pt | 0 | 0 | 0.00000 |
| HETATM               | 424 | Pt | 16.52205 | 12.06826 | 28.68038 | Pt | 0 | 0 | 0.00000 |
| HETATM               | 425 | Pt | 6.84907  | 20.43368 | 28.66390 | Pt | 0 | 0 | 0.00000 |
| HETATM               | 426 | Pt | 6.84898  | 9.26111  | 28.66393 | Pt | 0 | 0 | 0.00000 |
| HETATM               | 427 | Pt | 16.51103 | 26.02042 | 28.66435 | Pt | 0 | 0 | 0.00000 |
| HETATM               | 428 | Pt | 16.52510 | 14.85577 | 28.66326 | Pt | 0 | 0 | 0.00000 |
| HETATM               | 429 | Pt | 6.85864  | 23.21735 | 28.68150 | Pt | 0 | 0 | 0.00000 |
| HETATM               | 430 | Pt | 6.84928  | 12.04968 | 28.68078 | Pt | 0 | 0 | 0.00000 |
| HETATM               | 431 | Pt | 16.52261 | 28.80148 | 28.66504 | Pt | 0 | 0 | 0.00000 |
| HETATM               | 432 | Pt | 16.52973 | 17.63808 | 28.68131 | Pt | 0 | 0 | 0.00000 |
| HETATM               | 433 | Pt | 9.25404  | 16.24922 | 28.68335 | Pt | 0 | 0 | 0.00000 |
| HETATM               | 434 | Pt | 9.27396  | 27.41451 | 28.66669 | Pt | 0 | 0 | 0.00000 |
| HETATM               | 435 | Pt | 18.92316 | 21.83264 | 28.68176 | Pt | 0 | 0 | 0.00000 |
| HETATM               | 436 | Pt | 18.92028 | 32.99058 | 28.68209 | Pt | 0 | 0 | 0.00000 |
| HETATM               | 437 | Pt | 9.23944  | 19.04166 | 28.64826 | Pt | 0 | 0 | 0.00000 |
| HETATM               | 438 | Pt | 9.25572  | 7.86988  | 28.68053 | Pt | 0 | 0 | 0.00000 |
| HETATM               | 439 | Pt | 18.90503 | 24.62468 | 28.64849 | Pt | 0 | 0 | 0.00000 |
| HETATM               | 440 | Pt | 18.91190 | 13.45771 | 28.64839 | Pt | 0 | 0 | 0.00000 |
| HETATM               | 441 | Pt | 9.25558  | 21.83364 | 28.68140 | Pt | 0 | 0 | 0.00000 |
| HETATM               | 442 | Pt | 9.23886  | 10.66193 | 28.64913 | Pt | 0 | 0 | 0.00000 |
| HETATM               | 443 | Pt | 18.92087 | 27.41465 | 28.68105 | Pt | 0 | 0 | 0.00000 |
| HETATM               | 444 | Pt | 18.92800 | 16.25158 | 28.68119 | Pt | 0 | 0 | 0.00000 |
| HETATM               | 445 | Pt | 9.26910  | 24.62372 | 28.66766 | Pt | 0 | 0 | 0.00000 |
| HETATM               | 446 | Pt | 9.24875  | 13.45949 | 28.68407 | Pt | 0 | 0 | 0.00000 |
| HETATM               | 447 | Pt | 18.94084 | 30.20024 | 28.66862 | Pt | 0 | 0 | 0.00000 |
| HETATM               | 448 | Pt | 18.93835 | 19.04207 | 28.66947 | Pt | 0 | 0 | 0.00000 |
| HETATM               | 449 | O  | 2.81995  | 13.45715 | 29.86540 | O  | 0 | 0 | 0.00000 |
| HETATM               | 450 | O  | 2.82430  | 2.29371  | 29.86496 | O  | 0 | 0 | 0.00000 |
| HETATM               | 451 | O  | 12.49102 | 19.04447 | 29.86532 | O  | 0 | 0 | 0.00000 |
| HETATM               | 452 | O  | 12.49114 | 10.66097 | 29.86538 | O  | 0 | 0 | 0.00000 |
| UNIT ENERGY kcal     |     |    |          |          |          |    |   |   |         |
| ENERGY -57865.867351 |     |    |          |          |          |    |   |   |         |
| END                  |     |    |          |          |          |    |   |   |         |
