# Supplementary material for: Development of a ReaxFF potential for Pt–O systems describing the energetics and dynamics of Pt-oxide formation
Source: Royal Society of Chemistry journal article supplement (doi:10.1039/c4cp03111c), 2014-01-01
Supplement: c4cp03111c1.zip [file c4cp03111c1.zip]

```

XTLGRF 200
DESCRP IS
REMARK Pt111_4x4x7_30.0_vac "bridge"-diffusion
FIXATOMS      1      32
CRYSTX      11.16485      11.16485      43.67409      90.00000      90.00000      60.00000
FORMAT ATOM      (a6,lx,i5,lx,a5,lx,a3,lx,a1,lx,a5,3f10.5,lx,a5,i3,i2,lx,f8.5)
HETATM      1 Pt      1.26610      9.27118      14.99394      Pt      1 0      0.00000
HETATM      2 Pt      1.26610      0.89754      14.99394      Pt      1 0      0.00000
HETATM      3 Pt      1.26610      3.68875      14.99394      Pt      1 0      0.00000
HETATM      4 Pt      1.26610      6.47997      14.99394      Pt      1 0      0.00000
HETATM      5 Pt      3.68336      10.66679      14.99394      Pt      1 0      0.00000
HETATM      6 Pt      3.68336      2.29315      14.99394      Pt      1 0      0.00000
HETATM      7 Pt      3.68336      5.08436      14.99394      Pt      1 0      0.00000
HETATM      8 Pt      3.68336      7.87557      14.99394      Pt      1 0      0.00000
HETATM      9 Pt      6.10062      12.06239      14.99394      Pt      1 0      0.00000
HETATM     10 Pt      6.10062      3.68875      14.99394      Pt      1 0      0.00000
HETATM     11 Pt      6.10062      6.47997      14.99394      Pt      1 0      0.00000
HETATM     12 Pt      6.10062      9.27118      14.99394      Pt      1 0      0.00000
HETATM     13 Pt      8.51788      13.45800      14.99394      Pt      1 0      0.00000
HETATM     14 Pt      8.51788      5.08436      14.99394      Pt      1 0      0.00000
HETATM     15 Pt      8.51788      7.87557      14.99394      Pt      1 0      0.00000
HETATM     16 Pt      8.51788      10.66678      14.99394      Pt      1 0      0.00000
HETATM     17 Pt      2.07185      10.66679      17.27296      Pt      1 0      0.00000
HETATM     18 Pt      2.07185      2.29315      17.27296      Pt      1 0      0.00000
HETATM     19 Pt      2.07185      5.08436      17.27296      Pt      1 0      0.00000
HETATM     20 Pt      2.07185      7.87557      17.27296      Pt      1 0      0.00000
HETATM     21 Pt      4.48911      12.06239      17.27296      Pt      1 0      0.00000
HETATM     22 Pt      4.48911      3.68875      17.27296      Pt      1 0      0.00000
HETATM     23 Pt      4.48911      6.47997      17.27296      Pt      1 0      0.00000
HETATM     24 Pt      4.48911      9.27118      17.27296      Pt      1 0      0.00000
HETATM     25 Pt      6.90637      13.45800      17.27296      Pt      1 0      0.00000
HETATM     26 Pt      6.90637      5.08436      17.27296      Pt      1 0      0.00000
HETATM     27 Pt      6.90637      7.87557      17.27296      Pt      1 0      0.00000
HETATM     28 Pt      6.90637      10.66678      17.27296      Pt      1 0      0.00000
HETATM     29 Pt      9.32364      14.85360      17.27296      Pt      1 0      0.00000
HETATM     30 Pt      9.32364      6.47997      17.27296      Pt      1 0      0.00000
HETATM     31 Pt      9.32364      9.27118      17.27296      Pt      1 0      0.00000
HETATM     32 Pt      9.32364      12.06239      17.27296      Pt      1 0      0.00000
HETATM     33 Pt      2.87767      12.06251      19.55007      Pt      1 0      0.00000
HETATM     34 Pt      2.87706      3.68883      19.55232      Pt      1 0      0.00000
HETATM     35 Pt      2.87706      6.47989      19.55232      Pt      1 0      0.00000
HETATM     36 Pt      2.87767      9.27106      19.55007      Pt      1 0      0.00000
HETATM     37 Pt      5.29520      13.45757      19.55232      Pt      1 0      0.00000
HETATM     38 Pt      5.29486      5.08436      19.55250      Pt      1 0      0.00000
HETATM     39 Pt      5.29520      7.87600      19.55232      Pt      1 0      0.00000
HETATM     40 Pt      5.29570      10.66678      19.55189      Pt      1 0      0.00000
HETATM     41 Pt      7.71233      14.85310      19.55232      Pt      1 0      0.00000
HETATM     42 Pt      7.71233      6.48047      19.55232      Pt      1 0      0.00000
HETATM     43 Pt      7.71241      9.27166      19.55370      Pt      1 0      0.00000
HETATM     44 Pt      7.71241      12.06190      19.55370      Pt      1 0      0.00000
HETATM     45 Pt      0.46021      10.66679      19.55007      Pt      1 0      0.00000
HETATM     46 Pt      0.45993      2.29387      19.55189      Pt      1 0      0.00000
HETATM     47 Pt      0.45979      5.08436      19.55370      Pt      1 0      0.00000
HETATM     48 Pt      0.45993      7.87484      19.55189      Pt      1 0      0.00000
HETATM     49 Pt      1.26579      9.27065      21.82661      Pt      1 0      0.00000
HETATM     50 Pt      1.26579      0.89807      21.82661      Pt      1 0      0.00000
HETATM     51 Pt      1.26486      3.68927      21.83325      Pt      1 0      0.00000
HETATM     52 Pt      1.26486      6.47945      21.83325      Pt      1 0      0.00000
HETATM     53 Pt      3.68397      10.66678      21.82661      Pt      1 0      0.00000
HETATM     54 Pt      3.68287      2.29230      21.82900      Pt      1 0      0.00000
HETATM     55 Pt      3.68211      5.08436      21.83068      Pt      1 0      0.00000
HETATM     56 Pt      3.68287      7.87642      21.82900      Pt      1 0      0.00000
HETATM     57 Pt      6.10169      12.06157      21.83325      Pt      1 0      0.00000

```

|        |     |    |         |          |          |    |   |   |         |
|--------|-----|----|---------|----------|----------|----|---|---|---------|
| HETATM | 58  | Pt | 6.10124 | 3.68767  | 21.83068 | Pt | 1 | 0 | 0.00000 |
| HETATM | 59  | Pt | 6.10124 | 6.48105  | 21.83068 | Pt | 1 | 0 | 0.00000 |
| HETATM | 60  | Pt | 6.10169 | 9.27199  | 21.83325 | Pt | 1 | 0 | 0.00000 |
| HETATM | 61  | Pt | 8.51805 | 13.45666 | 21.83325 | Pt | 1 | 0 | 0.00000 |
| HETATM | 62  | Pt | 8.51885 | 5.08436  | 21.82900 | Pt | 1 | 0 | 0.00000 |
| HETATM | 63  | Pt | 8.51805 | 7.87691  | 21.83325 | Pt | 1 | 0 | 0.00000 |
| HETATM | 64  | Pt | 8.51788 | 10.66678 | 21.83693 | Pt | 1 | 0 | 0.00000 |
| HETATM | 65  | Pt | 2.07185 | 10.66678 | 24.09777 | Pt | 1 | 0 | 0.00000 |
| HETATM | 66  | Pt | 2.07019 | 2.29288  | 24.10706 | Pt | 1 | 0 | 0.00000 |
| HETATM | 67  | Pt | 2.07011 | 5.08436  | 24.11387 | Pt | 1 | 0 | 0.00000 |
| HETATM | 68  | Pt | 2.07019 | 7.87584  | 24.10706 | Pt | 1 | 0 | 0.00000 |
| HETATM | 69  | Pt | 4.48971 | 12.06082 | 24.10706 | Pt | 1 | 0 | 0.00000 |
| HETATM | 70  | Pt | 4.48847 | 3.68764  | 24.10566 | Pt | 1 | 0 | 0.00000 |
| HETATM | 71  | Pt | 4.48847 | 6.48108  | 24.10566 | Pt | 1 | 0 | 0.00000 |
| HETATM | 72  | Pt | 4.48971 | 9.27275  | 24.10706 | Pt | 1 | 0 | 0.00000 |
| HETATM | 73  | Pt | 6.90724 | 13.45649 | 24.11387 | Pt | 1 | 0 | 0.00000 |
| HETATM | 74  | Pt | 6.90766 | 5.08436  | 24.10566 | Pt | 1 | 0 | 0.00000 |
| HETATM | 75  | Pt | 6.90724 | 7.87708  | 24.11387 | Pt | 1 | 0 | 0.00000 |
| HETATM | 76  | Pt | 6.90760 | 10.66678 | 24.11939 | Pt | 1 | 0 | 0.00000 |
| HETATM | 77  | Pt | 9.32469 | 14.85230 | 24.10706 | Pt | 1 | 0 | 0.00000 |
| HETATM | 78  | Pt | 9.32469 | 6.48127  | 24.10706 | Pt | 1 | 0 | 0.00000 |
| HETATM | 79  | Pt | 9.32302 | 9.27224  | 24.11939 | Pt | 1 | 0 | 0.00000 |
| HETATM | 80  | Pt | 9.32302 | 12.06132 | 24.11939 | Pt | 1 | 0 | 0.00000 |
| HETATM | 81  | Pt | 2.87473 | 12.05740 | 26.37463 | Pt | 1 | 0 | 0.00000 |
| HETATM | 82  | Pt | 2.88020 | 3.68373  | 26.38642 | Pt | 1 | 0 | 0.00000 |
| HETATM | 83  | Pt | 2.88020 | 6.48499  | 26.38642 | Pt | 1 | 0 | 0.00000 |
| HETATM | 84  | Pt | 2.87473 | 9.27616  | 26.37463 | Pt | 1 | 0 | 0.00000 |
| HETATM | 85  | Pt | 5.28922 | 13.45773 | 26.38642 | Pt | 1 | 0 | 0.00000 |
| HETATM | 86  | Pt | 5.29487 | 5.08436  | 26.38057 | Pt | 1 | 0 | 0.00000 |
| HETATM | 87  | Pt | 5.28922 | 7.87584  | 26.38642 | Pt | 1 | 0 | 0.00000 |
| HETATM | 88  | Pt | 5.29505 | 10.66678 | 26.39395 | Pt | 1 | 0 | 0.00000 |
| HETATM | 89  | Pt | 7.71518 | 14.85836 | 26.38642 | Pt | 1 | 0 | 0.00000 |
| HETATM | 90  | Pt | 7.71518 | 6.47520  | 26.38642 | Pt | 1 | 0 | 0.00000 |
| HETATM | 91  | Pt | 7.71093 | 9.26910  | 26.40653 | Pt | 1 | 0 | 0.00000 |
| HETATM | 92  | Pt | 7.71093 | 12.06447 | 26.40653 | Pt | 1 | 0 | 0.00000 |
| HETATM | 93  | Pt | 0.46611 | 10.66679 | 26.37463 | Pt | 1 | 0 | 0.00000 |
| HETATM | 94  | Pt | 0.46026 | 2.29331  | 26.39395 | Pt | 1 | 0 | 0.00000 |
| HETATM | 95  | Pt | 0.46275 | 5.08436  | 26.40653 | Pt | 1 | 0 | 0.00000 |
| HETATM | 96  | Pt | 0.46026 | 7.87541  | 26.39395 | Pt | 1 | 0 | 0.00000 |
| HETATM | 97  | Pt | 1.26930 | 9.27672  | 28.66373 | Pt | 1 | 0 | 0.00000 |
| HETATM | 98  | Pt | 1.26930 | 0.89200  | 28.66373 | Pt | 1 | 0 | 0.00000 |
| HETATM | 99  | Pt | 1.25674 | 3.67416  | 28.69497 | Pt | 1 | 0 | 0.00000 |
| HETATM | 100 | Pt | 1.25674 | 6.49455  | 28.69497 | Pt | 1 | 0 | 0.00000 |
| HETATM | 101 | Pt | 3.67696 | 10.66678 | 28.66373 | Pt | 1 | 0 | 0.00000 |
| HETATM | 102 | Pt | 3.66995 | 2.26992  | 28.64375 | Pt | 1 | 0 | 0.00000 |
| HETATM | 103 | Pt | 3.66736 | 5.08436  | 28.73828 | Pt | 1 | 0 | 0.00000 |
| HETATM | 104 | Pt | 3.66995 | 7.89880  | 28.64375 | Pt | 1 | 0 | 0.00000 |
| HETATM | 105 | Pt | 6.09266 | 12.04700 | 28.69497 | Pt | 1 | 0 | 0.00000 |
| HETATM | 106 | Pt | 6.10862 | 3.67490  | 28.73828 | Pt | 1 | 0 | 0.00000 |
| HETATM | 107 | Pt | 6.10862 | 6.49382  | 28.73828 | Pt | 1 | 0 | 0.00000 |
| HETATM | 108 | Pt | 6.09266 | 9.28657  | 28.69497 | Pt | 1 | 0 | 0.00000 |
| HETATM | 109 | Pt | 8.53519 | 13.45719 | 28.69497 | Pt | 1 | 0 | 0.00000 |
| HETATM | 110 | Pt | 8.54470 | 5.08436  | 28.64375 | Pt | 1 | 0 | 0.00000 |
| HETATM | 111 | Pt | 8.53519 | 7.87638  | 28.69497 | Pt | 1 | 0 | 0.00000 |
| HETATM | 112 | Pt | 8.51788 | 10.66678 | 28.68932 | Pt | 1 | 0 | 0.00000 |
| HETATM | 113 | O  | 5.29487 | 5.08436  | 29.84788 | O  | 1 | 0 | 0.00000 |

UNIT ENERGY kcal  
 ENERGY -14462.712554  
 END

XTLGRF 200  
 DESCRP TS  
 REMARK Pt111\_4x4x7\_30.0\_vac "bridge"-diffusion

|          |          |                                                               |          |          |          |          |             |
|----------|----------|---------------------------------------------------------------|----------|----------|----------|----------|-------------|
| FIXATOMS | 1        | 32                                                            |          |          |          |          |             |
| CRYSTX   | 11.16485 | 11.16485                                                      | 43.67409 | 90.00000 | 90.00000 | 60.00000 |             |
| FORMAT   | ATOM     | (a6,1x,i5,1x,a5,1x,a3,1x,a1,1x,a5,3f10.5,1x,a5,i3,i2,1x,f8.5) |          |          |          |          |             |
| HETATM   | 1        | Pt                                                            | 1.26632  | 9.27157  | 14.99394 | Pt       | 1 0 0.00000 |
| HETATM   | 2        | Pt                                                            | 1.26632  | 0.89793  | 14.99394 | Pt       | 1 0 0.00000 |
| HETATM   | 3        | Pt                                                            | 1.26632  | 3.68914  | 14.99394 | Pt       | 1 0 0.00000 |
| HETATM   | 4        | Pt                                                            | 1.26632  | 6.48036  | 14.99394 | Pt       | 1 0 0.00000 |
| HETATM   | 5        | Pt                                                            | 3.68358  | 10.66718 | 14.99394 | Pt       | 1 0 0.00000 |
| HETATM   | 6        | Pt                                                            | 3.68358  | 2.29354  | 14.99394 | Pt       | 1 0 0.00000 |
| HETATM   | 7        | Pt                                                            | 3.68358  | 5.08475  | 14.99394 | Pt       | 1 0 0.00000 |
| HETATM   | 8        | Pt                                                            | 3.68358  | 7.87596  | 14.99394 | Pt       | 1 0 0.00000 |
| HETATM   | 9        | Pt                                                            | 6.10084  | 12.06278 | 14.99394 | Pt       | 1 0 0.00000 |
| HETATM   | 10       | Pt                                                            | 6.10084  | 3.68914  | 14.99394 | Pt       | 1 0 0.00000 |
| HETATM   | 11       | Pt                                                            | 6.10084  | 6.48036  | 14.99394 | Pt       | 1 0 0.00000 |
| HETATM   | 12       | Pt                                                            | 6.10084  | 9.27157  | 14.99394 | Pt       | 1 0 0.00000 |
| HETATM   | 13       | Pt                                                            | 8.51810  | 13.45839 | 14.99394 | Pt       | 1 0 0.00000 |
| HETATM   | 14       | Pt                                                            | 8.51810  | 5.08475  | 14.99394 | Pt       | 1 0 0.00000 |
| HETATM   | 15       | Pt                                                            | 8.51810  | 7.87596  | 14.99394 | Pt       | 1 0 0.00000 |
| HETATM   | 16       | Pt                                                            | 8.51810  | 10.66717 | 14.99394 | Pt       | 1 0 0.00000 |
| HETATM   | 17       | Pt                                                            | 2.07207  | 10.66718 | 17.27296 | Pt       | 1 0 0.00000 |
| HETATM   | 18       | Pt                                                            | 2.07207  | 2.29354  | 17.27296 | Pt       | 1 0 0.00000 |
| HETATM   | 19       | Pt                                                            | 2.07207  | 5.08475  | 17.27296 | Pt       | 1 0 0.00000 |
| HETATM   | 20       | Pt                                                            | 2.07207  | 7.87596  | 17.27296 | Pt       | 1 0 0.00000 |
| HETATM   | 21       | Pt                                                            | 4.48933  | 12.06278 | 17.27296 | Pt       | 1 0 0.00000 |
| HETATM   | 22       | Pt                                                            | 4.48933  | 3.68914  | 17.27296 | Pt       | 1 0 0.00000 |
| HETATM   | 23       | Pt                                                            | 4.48933  | 6.48036  | 17.27296 | Pt       | 1 0 0.00000 |
| HETATM   | 24       | Pt                                                            | 4.48933  | 9.27157  | 17.27296 | Pt       | 1 0 0.00000 |
| HETATM   | 25       | Pt                                                            | 6.90659  | 13.45839 | 17.27296 | Pt       | 1 0 0.00000 |
| HETATM   | 26       | Pt                                                            | 6.90659  | 5.08475  | 17.27296 | Pt       | 1 0 0.00000 |
| HETATM   | 27       | Pt                                                            | 6.90659  | 7.87596  | 17.27296 | Pt       | 1 0 0.00000 |
| HETATM   | 28       | Pt                                                            | 6.90659  | 10.66717 | 17.27296 | Pt       | 1 0 0.00000 |
| HETATM   | 29       | Pt                                                            | 9.32386  | 14.85399 | 17.27296 | Pt       | 1 0 0.00000 |
| HETATM   | 30       | Pt                                                            | 9.32386  | 6.48036  | 17.27296 | Pt       | 1 0 0.00000 |
| HETATM   | 31       | Pt                                                            | 9.32386  | 9.27157  | 17.27296 | Pt       | 1 0 0.00000 |
| HETATM   | 32       | Pt                                                            | 9.32386  | 12.06278 | 17.27296 | Pt       | 1 0 0.00000 |
| HETATM   | 33       | Pt                                                            | 2.87800  | 12.06308 | 19.55122 | Pt       | 1 0 0.00000 |
| HETATM   | 34       | Pt                                                            | 2.87770  | 3.68918  | 19.55256 | Pt       | 1 0 0.00000 |
| HETATM   | 35       | Pt                                                            | 2.87768  | 6.48012  | 19.55221 | Pt       | 1 0 0.00000 |
| HETATM   | 36       | Pt                                                            | 2.87807  | 9.27153  | 19.55069 | Pt       | 1 0 0.00000 |
| HETATM   | 37       | Pt                                                            | 5.29518  | 13.45828 | 19.55256 | Pt       | 1 0 0.00000 |
| HETATM   | 38       | Pt                                                            | 5.29503  | 5.08462  | 19.55256 | Pt       | 1 0 0.00000 |
| HETATM   | 39       | Pt                                                            | 5.29530  | 7.87616  | 19.55175 | Pt       | 1 0 0.00000 |
| HETATM   | 40       | Pt                                                            | 5.29555  | 10.66727 | 19.55176 | Pt       | 1 0 0.00000 |
| HETATM   | 41       | Pt                                                            | 7.71222  | 14.85375 | 19.55221 | Pt       | 1 0 0.00000 |
| HETATM   | 42       | Pt                                                            | 7.71243  | 6.48063  | 19.55174 | Pt       | 1 0 0.00000 |
| HETATM   | 43       | Pt                                                            | 7.71250  | 9.27183  | 19.55237 | Pt       | 1 0 0.00000 |
| HETATM   | 44       | Pt                                                            | 7.71239  | 12.06256 | 19.55253 | Pt       | 1 0 0.00000 |
| HETATM   | 45       | Pt                                                            | 0.46043  | 10.66738 | 19.55067 | Pt       | 1 0 0.00000 |
| HETATM   | 46       | Pt                                                            | 0.46041  | 2.29397  | 19.55175 | Pt       | 1 0 0.00000 |
| HETATM   | 47       | Pt                                                            | 0.46036  | 5.08465  | 19.55255 | Pt       | 1 0 0.00000 |
| HETATM   | 48       | Pt                                                            | 0.46026  | 7.87549  | 19.55170 | Pt       | 1 0 0.00000 |
| HETATM   | 49       | Pt                                                            | 1.26640  | 9.27171  | 21.82654 | Pt       | 1 0 0.00000 |
| HETATM   | 50       | Pt                                                            | 1.26614  | 0.89866  | 21.82877 | Pt       | 1 0 0.00000 |
| HETATM   | 51       | Pt                                                            | 1.26577  | 3.68924  | 21.83198 | Pt       | 1 0 0.00000 |
| HETATM   | 52       | Pt                                                            | 1.26566  | 6.47958  | 21.83164 | Pt       | 1 0 0.00000 |
| HETATM   | 53       | Pt                                                            | 3.68430  | 10.66737 | 21.82878 | Pt       | 1 0 0.00000 |
| HETATM   | 54       | Pt                                                            | 3.68365  | 2.29366  | 21.83179 | Pt       | 1 0 0.00000 |
| HETATM   | 55       | Pt                                                            | 3.68334  | 5.08441  | 21.83230 | Pt       | 1 0 0.00000 |
| HETATM   | 56       | Pt                                                            | 3.68390  | 7.87607  | 21.82952 | Pt       | 1 0 0.00000 |
| HETATM   | 57       | Pt                                                            | 6.10121  | 12.06237 | 21.83198 | Pt       | 1 0 0.00000 |
| HETATM   | 58       | Pt                                                            | 6.10066  | 3.68876  | 21.83229 | Pt       | 1 0 0.00000 |
| HETATM   | 59       | Pt                                                            | 6.10120  | 6.48097  | 21.83045 | Pt       | 1 0 0.00000 |
| HETATM   | 60       | Pt                                                            | 6.10140  | 9.27202  | 21.83142 | Pt       | 1 0 0.00000 |

|        |     |    |         |          |          |    |   |   |         |
|--------|-----|----|---------|----------|----------|----|---|---|---------|
| HETATM | 61  | Pt | 8.51778 | 13.45742 | 21.83163 | Pt | 1 | 0 | 0.00000 |
| HETATM | 62  | Pt | 8.51802 | 5.08507  | 21.82953 | Pt | 1 | 0 | 0.00000 |
| HETATM | 63  | Pt | 8.51822 | 7.87665  | 21.83151 | Pt | 1 | 0 | 0.00000 |
| HETATM | 64  | Pt | 8.51814 | 10.66722 | 21.83328 | Pt | 1 | 0 | 0.00000 |
| HETATM | 65  | Pt | 2.07242 | 10.66774 | 24.10291 | Pt | 1 | 0 | 0.00000 |
| HETATM | 66  | Pt | 2.07160 | 2.29337  | 24.10952 | Pt | 1 | 0 | 0.00000 |
| HETATM | 67  | Pt | 2.07132 | 5.08255  | 24.11179 | Pt | 1 | 0 | 0.00000 |
| HETATM | 68  | Pt | 2.07000 | 7.87865  | 24.10269 | Pt | 1 | 0 | 0.00000 |
| HETATM | 69  | Pt | 4.48942 | 12.06229 | 24.10952 | Pt | 1 | 0 | 0.00000 |
| HETATM | 70  | Pt | 4.48956 | 3.68951  | 24.11269 | Pt | 1 | 0 | 0.00000 |
| HETATM | 71  | Pt | 4.49144 | 6.48095  | 24.10789 | Pt | 1 | 0 | 0.00000 |
| HETATM | 72  | Pt | 4.48989 | 9.27154  | 24.10898 | Pt | 1 | 0 | 0.00000 |
| HETATM | 73  | Pt | 6.90507 | 13.45659 | 24.11180 | Pt | 1 | 0 | 0.00000 |
| HETATM | 74  | Pt | 6.90607 | 5.08687  | 24.10790 | Pt | 1 | 0 | 0.00000 |
| HETATM | 75  | Pt | 6.90735 | 7.87724  | 24.11127 | Pt | 1 | 0 | 0.00000 |
| HETATM | 76  | Pt | 6.90725 | 10.66751 | 24.11395 | Pt | 1 | 0 | 0.00000 |
| HETATM | 77  | Pt | 9.32725 | 14.85357 | 24.10270 | Pt | 1 | 0 | 0.00000 |
| HETATM | 78  | Pt | 9.32357 | 6.48083  | 24.10897 | Pt | 1 | 0 | 0.00000 |
| HETATM | 79  | Pt | 9.32384 | 9.27230  | 24.11395 | Pt | 1 | 0 | 0.00000 |
| HETATM | 80  | Pt | 9.32370 | 12.06245 | 24.11521 | Pt | 1 | 0 | 0.00000 |
| HETATM | 81  | Pt | 2.87253 | 12.05358 | 26.37918 | Pt | 1 | 0 | 0.00000 |
| HETATM | 82  | Pt | 2.88130 | 3.67726  | 26.39046 | Pt | 1 | 0 | 0.00000 |
| HETATM | 83  | Pt | 2.87256 | 6.49686  | 26.36474 | Pt | 1 | 0 | 0.00000 |
| HETATM | 84  | Pt | 2.87767 | 9.27443  | 26.38217 | Pt | 1 | 0 | 0.00000 |
| HETATM | 85  | Pt | 5.28308 | 13.45544 | 26.39046 | Pt | 1 | 0 | 0.00000 |
| HETATM | 86  | Pt | 5.29710 | 5.08822  | 26.39304 | Pt | 1 | 0 | 0.00000 |
| HETATM | 87  | Pt | 5.29766 | 7.87838  | 26.39129 | Pt | 1 | 0 | 0.00000 |
| HETATM | 88  | Pt | 5.29548 | 10.66869 | 26.39119 | Pt | 1 | 0 | 0.00000 |
| HETATM | 89  | Pt | 7.72928 | 14.85766 | 26.36466 | Pt | 1 | 0 | 0.00000 |
| HETATM | 90  | Pt | 7.71316 | 6.48377  | 26.39129 | Pt | 1 | 0 | 0.00000 |
| HETATM | 91  | Pt | 7.71372 | 9.27395  | 26.39367 | Pt | 1 | 0 | 0.00000 |
| HETATM | 92  | Pt | 7.71089 | 12.06671 | 26.39991 | Pt | 1 | 0 | 0.00000 |
| HETATM | 93  | Pt | 0.46312 | 10.66847 | 26.38217 | Pt | 1 | 0 | 0.00000 |
| HETATM | 94  | Pt | 0.46170 | 2.29461  | 26.39119 | Pt | 1 | 0 | 0.00000 |
| HETATM | 95  | Pt | 0.46466 | 5.08545  | 26.39990 | Pt | 1 | 0 | 0.00000 |
| HETATM | 96  | Pt | 0.46075 | 7.87625  | 26.39294 | Pt | 1 | 0 | 0.00000 |
| HETATM | 97  | Pt | 1.26797 | 9.27441  | 28.66704 | Pt | 1 | 0 | 0.00000 |
| HETATM | 98  | Pt | 1.25276 | 0.88652  | 28.66771 | Pt | 1 | 0 | 0.00000 |
| HETATM | 99  | Pt | 1.26910 | 3.68434  | 28.68677 | Pt | 1 | 0 | 0.00000 |
| HETATM | 100 | Pt | 1.25622 | 6.48867  | 28.69589 | Pt | 1 | 0 | 0.00000 |
| HETATM | 101 | Pt | 3.68048 | 10.64972 | 28.66771 | Pt | 1 | 0 | 0.00000 |
| HETATM | 102 | Pt | 3.64677 | 2.22974  | 28.65523 | Pt | 1 | 0 | 0.00000 |
| HETATM | 103 | Pt | 3.69584 | 5.06287  | 28.70205 | Pt | 1 | 0 | 0.00000 |
| HETATM | 104 | Pt | 3.67647 | 7.86595  | 28.66087 | Pt | 1 | 0 | 0.00000 |
| HETATM | 105 | Pt | 6.09530 | 12.06276 | 28.68676 | Pt | 1 | 0 | 0.00000 |
| HETATM | 106 | Pt | 6.07577 | 3.68881  | 28.70207 | Pt | 1 | 0 | 0.00000 |
| HETATM | 107 | Pt | 6.13014 | 6.53108  | 28.71206 | Pt | 1 | 0 | 0.00000 |
| HETATM | 108 | Pt | 6.10032 | 9.28468  | 28.67469 | Pt | 1 | 0 | 0.00000 |
| HETATM | 109 | Pt | 8.53038 | 13.45380 | 28.69590 | Pt | 1 | 0 | 0.00000 |
| HETATM | 110 | Pt | 8.51301 | 5.07358  | 28.66088 | Pt | 1 | 0 | 0.00000 |
| HETATM | 111 | Pt | 8.52974 | 7.88208  | 28.67469 | Pt | 1 | 0 | 0.00000 |
| HETATM | 112 | Pt | 8.51750 | 10.66614 | 28.67854 | Pt | 1 | 0 | 0.00000 |
| HETATM | 113 | O  | 4.99367 | 4.56269  | 29.98394 | O  | 1 | 0 | 0.00000 |

UNIT ENERGY kcal  
ENERGY -14448.821575  
END

XTLGRF 200  
DESCRP FS  
REMARK Pt111\_4x4x7\_30.0\_vac "bridge"-diffusion  
FIXATOMS 1 32  
CRYSTX 11.16485 11.16485 43.67409 90.00000 90.00000 60.00000  
FORMAT ATOM (a6,1x,i5,1x,a5,1x,a3,1x,a1,1x,a5,3f10.5,1x,a5,i3,i2,1x,f8.5)

|        |    |    |         |          |          |    |   |   |         |
|--------|----|----|---------|----------|----------|----|---|---|---------|
| HETATM | 1  | Pt | 1.26669 | 9.27220  | 14.99394 | Pt | 1 | 0 | 0.00000 |
| HETATM | 2  | Pt | 1.26669 | 0.89856  | 14.99394 | Pt | 1 | 0 | 0.00000 |
| HETATM | 3  | Pt | 1.26669 | 3.68977  | 14.99394 | Pt | 1 | 0 | 0.00000 |
| HETATM | 4  | Pt | 1.26669 | 6.48099  | 14.99394 | Pt | 1 | 0 | 0.00000 |
| HETATM | 5  | Pt | 3.68395 | 10.66781 | 14.99394 | Pt | 1 | 0 | 0.00000 |
| HETATM | 6  | Pt | 3.68395 | 2.29417  | 14.99394 | Pt | 1 | 0 | 0.00000 |
| HETATM | 7  | Pt | 3.68395 | 5.08538  | 14.99394 | Pt | 1 | 0 | 0.00000 |
| HETATM | 8  | Pt | 3.68395 | 7.87659  | 14.99394 | Pt | 1 | 0 | 0.00000 |
| HETATM | 9  | Pt | 6.10121 | 12.06341 | 14.99394 | Pt | 1 | 0 | 0.00000 |
| HETATM | 10 | Pt | 6.10121 | 3.68977  | 14.99394 | Pt | 1 | 0 | 0.00000 |
| HETATM | 11 | Pt | 6.10121 | 6.48099  | 14.99394 | Pt | 1 | 0 | 0.00000 |
| HETATM | 12 | Pt | 6.10121 | 9.27220  | 14.99394 | Pt | 1 | 0 | 0.00000 |
| HETATM | 13 | Pt | 8.51847 | 13.45902 | 14.99394 | Pt | 1 | 0 | 0.00000 |
| HETATM | 14 | Pt | 8.51847 | 5.08538  | 14.99394 | Pt | 1 | 0 | 0.00000 |
| HETATM | 15 | Pt | 8.51847 | 7.87659  | 14.99394 | Pt | 1 | 0 | 0.00000 |
| HETATM | 16 | Pt | 8.51847 | 10.66780 | 14.99394 | Pt | 1 | 0 | 0.00000 |
| HETATM | 17 | Pt | 2.07244 | 10.66781 | 17.27296 | Pt | 1 | 0 | 0.00000 |
| HETATM | 18 | Pt | 2.07244 | 2.29417  | 17.27296 | Pt | 1 | 0 | 0.00000 |
| HETATM | 19 | Pt | 2.07244 | 5.08538  | 17.27296 | Pt | 1 | 0 | 0.00000 |
| HETATM | 20 | Pt | 2.07244 | 7.87659  | 17.27296 | Pt | 1 | 0 | 0.00000 |
| HETATM | 21 | Pt | 4.48970 | 12.06341 | 17.27296 | Pt | 1 | 0 | 0.00000 |
| HETATM | 22 | Pt | 4.48970 | 3.68977  | 17.27296 | Pt | 1 | 0 | 0.00000 |
| HETATM | 23 | Pt | 4.48970 | 6.48099  | 17.27296 | Pt | 1 | 0 | 0.00000 |
| HETATM | 24 | Pt | 4.48970 | 9.27220  | 17.27296 | Pt | 1 | 0 | 0.00000 |
| HETATM | 25 | Pt | 6.90696 | 13.45902 | 17.27296 | Pt | 1 | 0 | 0.00000 |
| HETATM | 26 | Pt | 6.90696 | 5.08538  | 17.27296 | Pt | 1 | 0 | 0.00000 |
| HETATM | 27 | Pt | 6.90696 | 7.87659  | 17.27296 | Pt | 1 | 0 | 0.00000 |
| HETATM | 28 | Pt | 6.90696 | 10.66780 | 17.27296 | Pt | 1 | 0 | 0.00000 |
| HETATM | 29 | Pt | 9.32423 | 14.85462 | 17.27296 | Pt | 1 | 0 | 0.00000 |
| HETATM | 30 | Pt | 9.32423 | 6.48099  | 17.27296 | Pt | 1 | 0 | 0.00000 |
| HETATM | 31 | Pt | 9.32423 | 9.27220  | 17.27296 | Pt | 1 | 0 | 0.00000 |
| HETATM | 32 | Pt | 9.32423 | 12.06341 | 17.27296 | Pt | 1 | 0 | 0.00000 |
| HETATM | 33 | Pt | 2.87864 | 12.06418 | 19.55252 | Pt | 1 | 0 | 0.00000 |
| HETATM | 34 | Pt | 2.87861 | 3.68977  | 19.55334 | Pt | 1 | 0 | 0.00000 |
| HETATM | 35 | Pt | 2.87864 | 6.48022  | 19.55252 | Pt | 1 | 0 | 0.00000 |
| HETATM | 36 | Pt | 2.87862 | 9.27220  | 19.55128 | Pt | 1 | 0 | 0.00000 |
| HETATM | 37 | Pt | 5.29524 | 13.45938 | 19.55334 | Pt | 1 | 0 | 0.00000 |
| HETATM | 38 | Pt | 5.29524 | 5.08502  | 19.55334 | Pt | 1 | 0 | 0.00000 |
| HETATM | 39 | Pt | 5.29561 | 7.87634  | 19.55124 | Pt | 1 | 0 | 0.00000 |
| HETATM | 40 | Pt | 5.29560 | 10.66806 | 19.55124 | Pt | 1 | 0 | 0.00000 |
| HETATM | 41 | Pt | 7.71183 | 14.85462 | 19.55251 | Pt | 1 | 0 | 0.00000 |
| HETATM | 42 | Pt | 7.71242 | 6.48099  | 19.55124 | Pt | 1 | 0 | 0.00000 |
| HETATM | 43 | Pt | 7.71272 | 9.27220  | 19.55068 | Pt | 1 | 0 | 0.00000 |
| HETATM | 44 | Pt | 7.71242 | 12.06341 | 19.55124 | Pt | 1 | 0 | 0.00000 |
| HETATM | 45 | Pt | 0.46072 | 10.66818 | 19.55128 | Pt | 1 | 0 | 0.00000 |
| HETATM | 46 | Pt | 0.46109 | 2.29443  | 19.55124 | Pt | 1 | 0 | 0.00000 |
| HETATM | 47 | Pt | 0.46109 | 5.08513  | 19.55124 | Pt | 1 | 0 | 0.00000 |
| HETATM | 48 | Pt | 0.46072 | 7.87622  | 19.55128 | Pt | 1 | 0 | 0.00000 |
| HETATM | 49 | Pt | 1.26669 | 9.27220  | 21.82753 | Pt | 1 | 0 | 0.00000 |
| HETATM | 50 | Pt | 1.26718 | 0.89967  | 21.83001 | Pt | 1 | 0 | 0.00000 |
| HETATM | 51 | Pt | 1.26688 | 3.68977  | 21.83082 | Pt | 1 | 0 | 0.00000 |
| HETATM | 52 | Pt | 1.26718 | 6.47988  | 21.83001 | Pt | 1 | 0 | 0.00000 |
| HETATM | 53 | Pt | 3.68466 | 10.66879 | 21.83001 | Pt | 1 | 0 | 0.00000 |
| HETATM | 54 | Pt | 3.68474 | 2.29554  | 21.83525 | Pt | 1 | 0 | 0.00000 |
| HETATM | 55 | Pt | 3.68474 | 5.08400  | 21.83525 | Pt | 1 | 0 | 0.00000 |
| HETATM | 56 | Pt | 3.68466 | 7.87561  | 21.83001 | Pt | 1 | 0 | 0.00000 |
| HETATM | 57 | Pt | 6.10111 | 12.06358 | 21.83082 | Pt | 1 | 0 | 0.00000 |
| HETATM | 58 | Pt | 6.09962 | 3.68977  | 21.83525 | Pt | 1 | 0 | 0.00000 |
| HETATM | 59 | Pt | 6.10111 | 6.48082  | 21.83082 | Pt | 1 | 0 | 0.00000 |
| HETATM | 60 | Pt | 6.10129 | 9.27220  | 21.82869 | Pt | 1 | 0 | 0.00000 |
| HETATM | 61 | Pt | 8.51726 | 13.45889 | 21.83001 | Pt | 1 | 0 | 0.00000 |
| HETATM | 62 | Pt | 8.51726 | 5.08551  | 21.83001 | Pt | 1 | 0 | 0.00000 |
| HETATM | 63 | Pt | 8.51843 | 7.87666  | 21.82869 | Pt | 1 | 0 | 0.00000 |

|                      |     |    |         |          |          |    |   |   |         |
|----------------------|-----|----|---------|----------|----------|----|---|---|---------|
| HETATM               | 64  | Pt | 8.51843 | 10.66774 | 21.82869 | Pt | 1 | 0 | 0.00000 |
| HETATM               | 65  | Pt | 2.07182 | 10.66673 | 24.10521 | Pt | 1 | 0 | 0.00000 |
| HETATM               | 66  | Pt | 2.07335 | 2.29686  | 24.11225 | Pt | 1 | 0 | 0.00000 |
| HETATM               | 67  | Pt | 2.07335 | 5.08269  | 24.11225 | Pt | 1 | 0 | 0.00000 |
| HETATM               | 68  | Pt | 2.07182 | 7.87767  | 24.10521 | Pt | 1 | 0 | 0.00000 |
| HETATM               | 69  | Pt | 4.49158 | 12.06554 | 24.11225 | Pt | 1 | 0 | 0.00000 |
| HETATM               | 70  | Pt | 4.48970 | 3.68977  | 24.12514 | Pt | 1 | 0 | 0.00000 |
| HETATM               | 71  | Pt | 4.49158 | 6.47885  | 24.11225 | Pt | 1 | 0 | 0.00000 |
| HETATM               | 72  | Pt | 4.48854 | 9.27220  | 24.10643 | Pt | 1 | 0 | 0.00000 |
| HETATM               | 73  | Pt | 6.90418 | 13.45846 | 24.11225 | Pt | 1 | 0 | 0.00000 |
| HETATM               | 74  | Pt | 6.90418 | 5.08594  | 24.11225 | Pt | 1 | 0 | 0.00000 |
| HETATM               | 75  | Pt | 6.90726 | 7.87711  | 24.10677 | Pt | 1 | 0 | 0.00000 |
| HETATM               | 76  | Pt | 6.90726 | 10.66729 | 24.10677 | Pt | 1 | 0 | 0.00000 |
| HETATM               | 77  | Pt | 9.32547 | 14.85462 | 24.10521 | Pt | 1 | 0 | 0.00000 |
| HETATM               | 78  | Pt | 9.32480 | 6.47998  | 24.10643 | Pt | 1 | 0 | 0.00000 |
| HETATM               | 79  | Pt | 9.32362 | 9.27220  | 24.10677 | Pt | 1 | 0 | 0.00000 |
| HETATM               | 80  | Pt | 9.32481 | 12.06442 | 24.10643 | Pt | 1 | 0 | 0.00000 |
| HETATM               | 81  | Pt | 2.87243 | 12.05343 | 26.37564 | Pt | 1 | 0 | 0.00000 |
| HETATM               | 82  | Pt | 2.88033 | 3.68977  | 26.41366 | Pt | 1 | 0 | 0.00000 |
| HETATM               | 83  | Pt | 2.87243 | 6.49097  | 26.37564 | Pt | 1 | 0 | 0.00000 |
| HETATM               | 84  | Pt | 2.87795 | 9.27220  | 26.38976 | Pt | 1 | 0 | 0.00000 |
| HETATM               | 85  | Pt | 5.29439 | 13.46086 | 26.41366 | Pt | 1 | 0 | 0.00000 |
| HETATM               | 86  | Pt | 5.29439 | 5.08354  | 26.41366 | Pt | 1 | 0 | 0.00000 |
| HETATM               | 87  | Pt | 5.29356 | 7.87923  | 26.38315 | Pt | 1 | 0 | 0.00000 |
| HETATM               | 88  | Pt | 5.29356 | 10.66517 | 26.38315 | Pt | 1 | 0 | 0.00000 |
| HETATM               | 89  | Pt | 7.72425 | 14.85462 | 26.37564 | Pt | 1 | 0 | 0.00000 |
| HETATM               | 90  | Pt | 7.71595 | 6.48066  | 26.38315 | Pt | 1 | 0 | 0.00000 |
| HETATM               | 91  | Pt | 7.71272 | 9.27220  | 26.38515 | Pt | 1 | 0 | 0.00000 |
| HETATM               | 92  | Pt | 7.71595 | 12.06374 | 26.38315 | Pt | 1 | 0 | 0.00000 |
| HETATM               | 93  | Pt | 0.46106 | 10.66759 | 26.38976 | Pt | 1 | 0 | 0.00000 |
| HETATM               | 94  | Pt | 0.45960 | 2.29121  | 26.38315 | Pt | 1 | 0 | 0.00000 |
| HETATM               | 95  | Pt | 0.45960 | 5.08834  | 26.38315 | Pt | 1 | 0 | 0.00000 |
| HETATM               | 96  | Pt | 0.46106 | 7.87681  | 26.38976 | Pt | 1 | 0 | 0.00000 |
| HETATM               | 97  | Pt | 1.26669 | 9.27220  | 28.67111 | Pt | 1 | 0 | 0.00000 |
| HETATM               | 98  | Pt | 1.25367 | 0.89780  | 28.68416 | Pt | 1 | 0 | 0.00000 |
| HETATM               | 99  | Pt | 1.23787 | 3.68977  | 28.65044 | Pt | 1 | 0 | 0.00000 |
| HETATM               | 100 | Pt | 1.25367 | 6.48174  | 28.68416 | Pt | 1 | 0 | 0.00000 |
| HETATM               | 101 | Pt | 3.68980 | 10.65615 | 28.68416 | Pt | 1 | 0 | 0.00000 |
| HETATM               | 102 | Pt | 3.68797 | 2.30114  | 28.74793 | Pt | 1 | 0 | 0.00000 |
| HETATM               | 103 | Pt | 3.68797 | 5.07841  | 28.74793 | Pt | 1 | 0 | 0.00000 |
| HETATM               | 104 | Pt | 3.68980 | 7.88825  | 28.68416 | Pt | 1 | 0 | 0.00000 |
| HETATM               | 105 | Pt | 6.11562 | 12.03845 | 28.65044 | Pt | 1 | 0 | 0.00000 |
| HETATM               | 106 | Pt | 6.09316 | 3.68977  | 28.74793 | Pt | 1 | 0 | 0.00000 |
| HETATM               | 107 | Pt | 6.11562 | 6.50595  | 28.65044 | Pt | 1 | 0 | 0.00000 |
| HETATM               | 108 | Pt | 6.10477 | 9.27220  | 28.66636 | Pt | 1 | 0 | 0.00000 |
| HETATM               | 109 | Pt | 8.52564 | 13.44812 | 28.68416 | Pt | 1 | 0 | 0.00000 |
| HETATM               | 110 | Pt | 8.52564 | 5.09628  | 28.68416 | Pt | 1 | 0 | 0.00000 |
| HETATM               | 111 | Pt | 8.51669 | 7.87968  | 28.66636 | Pt | 1 | 0 | 0.00000 |
| HETATM               | 112 | Pt | 8.51669 | 10.66472 | 28.66636 | Pt | 1 | 0 | 0.00000 |
| HETATM               | 113 | O  | 4.48970 | 3.68977  | 29.86819 | O  | 1 | 0 | 0.00000 |
| UNIT ENERGY kcal     |     |    |         |          |          |    |   |   |         |
| ENERGY -14466.437775 |     |    |         |          |          |    |   |   |         |
| END                  |     |    |         |          |          |    |   |   |         |
