# Supplementary material for: Development of a ReaxFF potential for Pt–O systems describing the energetics and dynamics of Pt-oxide formation
Source: Royal Society of Chemistry journal article supplement (doi:10.1039/c4cp03111c), 2014-01-01
Supplement: c4cp03111c1.zip [file c4cp03111c1.zip]

```

XTLGRF 200
DESCRP A0131
REMARK 1x1-clean-{100}-step
FIXATOMS 18 29
CRYSTX 2.79100 9.25650 56.48410 90.00000 90.00000 98.67070
FORMAT ATOM (a6,1x,i5,1x,a5,1x,a3,1x,a1,1x,a5,3f10.5,1x,a5,i3,i2,1x,f8.5)
HETATM 1 Pt 1.80467 2.59432 14.99149 Pt 0 0 0.00000
HETATM 2 Pt 0.07056 0.47837 15.59298 Pt 0 0 0.00000
HETATM 3 Pt 1.09640 7.20255 16.19482 Pt 0 0 0.00000
HETATM 4 Pt 2.12355 4.67519 16.80284 Pt 0 0 0.00000
HETATM 5 Pt 0.39064 2.56825 17.40929 Pt 0 0 0.00000
HETATM 6 Pt 1.41747 9.30073 18.00629 Pt 0 0 0.00000
HETATM 7 Pt 2.44425 6.77632 18.60820 Pt 0 0 0.00000
HETATM 8 Pt 0.71217 4.67176 19.21252 Pt 0 0 0.00000
HETATM 9 Pt 1.73903 2.14602 19.81554 Pt 0 0 0.00000
HETATM 10 Pt 2.76589 8.87785 20.41518 Pt 0 0 0.00000
HETATM 11 Pt 1.03334 6.77372 21.01733 Pt 0 0 0.00000
HETATM 12 Pt 2.06010 4.24875 21.62041 Pt 0 0 0.00000
HETATM 13 Pt 0.32781 2.14410 22.22268 Pt 0 0 0.00000
HETATM 14 Pt 1.35477 8.87594 22.82370 Pt 0 0 0.00000
HETATM 15 Pt 2.38113 6.35099 23.42577 Pt 0 0 0.00000
HETATM 16 Pt 0.64852 4.24697 24.02827 Pt 0 0 0.00000
HETATM 17 Pt 1.67498 1.72189 24.63050 Pt 0 0 0.00000
HETATM 18 Pt 2.70220 8.45346 25.23200 Pt 0 0 0.00000
HETATM 19 Pt 0.96929 6.34961 25.83377 Pt 0 0 0.00000
HETATM 20 Pt 1.99540 3.82486 26.43605 Pt 0 0 0.00000
HETATM 21 Pt 0.26257 1.72123 27.03866 Pt 0 0 0.00000
HETATM 22 Pt 1.29010 8.45236 27.63998 Pt 0 0 0.00000
HETATM 23 Pt 2.31589 5.92817 28.24189 Pt 0 0 0.00000
HETATM 24 Pt 0.58349 3.82410 28.84396 Pt 0 0 0.00000
HETATM 25 Pt 1.60927 1.29978 29.44624 Pt 0 0 0.00000
HETATM 26 Pt 2.63596 8.03124 30.04748 Pt 0 0 0.00000
HETATM 27 Pt 0.90424 5.92711 30.64967 Pt 0 0 0.00000
HETATM 28 Pt 1.93042 3.40237 31.25206 Pt 0 0 0.00000
HETATM 29 Pt 0.19807 1.29868 31.85393 Pt 0 0 0.00000
HETATM 30 Pt 1.22446 8.03002 32.45538 Pt 0 0 0.00000
HETATM 31 Pt 2.25096 5.50489 33.05811 Pt 0 0 0.00000
HETATM 32 Pt 0.51816 3.40109 33.66043 Pt 0 0 0.00000
HETATM 33 Pt 1.54461 0.87595 34.26150 Pt 0 0 0.00000
HETATM 34 Pt 2.57118 7.60747 34.86333 Pt 0 0 0.00000
HETATM 35 Pt 0.83825 5.50302 35.46674 Pt 0 0 0.00000
HETATM 36 Pt 1.86475 2.97833 36.06897 Pt 0 0 0.00000
HETATM 37 Pt 0.13214 0.87395 36.66877 Pt 0 0 0.00000
HETATM 38 Pt 1.15871 7.60510 37.27150 Pt 0 0 0.00000
HETATM 39 Pt 2.18458 5.07942 37.87564 Pt 0 0 0.00000
HETATM 40 Pt 0.45216 2.97562 38.47787 Pt 0 0 0.00000
HETATM 41 Pt 1.47877 0.45126 39.07537 Pt 0 0 0.00000
HETATM 42 Pt 2.50505 7.17999 39.68121 Pt 0 0 0.00000
HETATM 43 Pt 0.77159 5.07323 40.28921 Pt 0 0 0.00000
HETATM 44 Pt 1.79722 2.54077 40.89143 Pt 0 0 0.00000
HETATM 45 Pt 0.06286 0.42453 41.49339 Pt 0 0 0.00000
UNIT ENERGY kcal
ENERGY -5848.049294
END

```

```

XTLGRF 200
DESCRP A0187
REMARK 2x1-clean-{100}-step
FIXATOMS 35 58
CRYSTX 5.58200 9.25650 56.48410 90.00000 90.00000 98.67070
FORMAT ATOM (a6,1x,i5,1x,a5,1x,a3,1x,a1,1x,a5,3f10.5,1x,a5,i3,i2,1x,f8.5)
HETATM 1 Pt 1.82061 2.80470 14.99148 Pt 0 0 0.00000
HETATM 2 Pt 4.57972 2.38394 14.99149 Pt 0 0 0.00000

```

|        |    |    |         |         |          |    |   |   |         |
|--------|----|----|---------|---------|----------|----|---|---|---------|
| HETATM | 3  | Pt | 0.08650 | 0.68875 | 15.59298 | Pt | 0 | 0 | 0.00000 |
| HETATM | 4  | Pt | 2.84561 | 0.26799 | 15.59298 | Pt | 0 | 0 | 0.00000 |
| HETATM | 5  | Pt | 1.11234 | 7.41293 | 16.19482 | Pt | 0 | 0 | 0.00000 |
| HETATM | 6  | Pt | 3.87144 | 6.99217 | 16.19482 | Pt | 0 | 0 | 0.00000 |
| HETATM | 7  | Pt | 2.13949 | 4.88557 | 16.80283 | Pt | 0 | 0 | 0.00000 |
| HETATM | 8  | Pt | 4.89859 | 4.46481 | 16.80283 | Pt | 0 | 0 | 0.00000 |
| HETATM | 9  | Pt | 0.40658 | 2.77864 | 17.40929 | Pt | 0 | 0 | 0.00000 |
| HETATM | 10 | Pt | 3.16568 | 2.35788 | 17.40929 | Pt | 0 | 0 | 0.00000 |
| HETATM | 11 | Pt | 1.43341 | 9.51111 | 18.00629 | Pt | 0 | 0 | 0.00000 |
| HETATM | 12 | Pt | 4.19251 | 9.09035 | 18.00629 | Pt | 0 | 0 | 0.00000 |
| HETATM | 13 | Pt | 2.46019 | 6.98670 | 18.60820 | Pt | 0 | 0 | 0.00000 |
| HETATM | 14 | Pt | 5.21929 | 6.56594 | 18.60820 | Pt | 0 | 0 | 0.00000 |
| HETATM | 15 | Pt | 0.72811 | 4.88215 | 19.21252 | Pt | 0 | 0 | 0.00000 |
| HETATM | 16 | Pt | 3.48722 | 4.46139 | 19.21252 | Pt | 0 | 0 | 0.00000 |
| HETATM | 17 | Pt | 1.75497 | 2.35641 | 19.81554 | Pt | 0 | 0 | 0.00000 |
| HETATM | 18 | Pt | 4.51407 | 1.93565 | 19.81554 | Pt | 0 | 0 | 0.00000 |
| HETATM | 19 | Pt | 2.78183 | 9.08824 | 20.41518 | Pt | 0 | 0 | 0.00000 |
| HETATM | 20 | Pt | 5.54093 | 8.66748 | 20.41517 | Pt | 0 | 0 | 0.00000 |
| HETATM | 21 | Pt | 1.04929 | 6.98411 | 21.01733 | Pt | 0 | 0 | 0.00000 |
| HETATM | 22 | Pt | 3.80838 | 6.56335 | 21.01733 | Pt | 0 | 0 | 0.00000 |
| HETATM | 23 | Pt | 2.07605 | 4.45914 | 21.62041 | Pt | 0 | 0 | 0.00000 |
| HETATM | 24 | Pt | 4.83514 | 4.03838 | 21.62041 | Pt | 0 | 0 | 0.00000 |
| HETATM | 25 | Pt | 0.34375 | 2.35449 | 22.22267 | Pt | 0 | 0 | 0.00000 |
| HETATM | 26 | Pt | 3.10286 | 1.93373 | 22.22268 | Pt | 0 | 0 | 0.00000 |
| HETATM | 27 | Pt | 1.37072 | 9.08632 | 22.82370 | Pt | 0 | 0 | 0.00000 |
| HETATM | 28 | Pt | 4.12982 | 8.66557 | 22.82370 | Pt | 0 | 0 | 0.00000 |
| HETATM | 29 | Pt | 2.39708 | 6.56138 | 23.42576 | Pt | 0 | 0 | 0.00000 |
| HETATM | 30 | Pt | 5.15619 | 6.14062 | 23.42577 | Pt | 0 | 0 | 0.00000 |
| HETATM | 31 | Pt | 0.66447 | 4.45736 | 24.02828 | Pt | 0 | 0 | 0.00000 |
| HETATM | 32 | Pt | 3.42357 | 4.03660 | 24.02828 | Pt | 0 | 0 | 0.00000 |
| HETATM | 33 | Pt | 1.69093 | 1.93228 | 24.63050 | Pt | 0 | 0 | 0.00000 |
| HETATM | 34 | Pt | 4.45002 | 1.51152 | 24.63050 | Pt | 0 | 0 | 0.00000 |
| HETATM | 35 | Pt | 2.71815 | 8.66384 | 25.23200 | Pt | 0 | 0 | 0.00000 |
| HETATM | 36 | Pt | 5.47725 | 8.24309 | 25.23200 | Pt | 0 | 0 | 0.00000 |
| HETATM | 37 | Pt | 0.98523 | 6.55999 | 25.83377 | Pt | 0 | 0 | 0.00000 |
| HETATM | 38 | Pt | 3.74433 | 6.13924 | 25.83376 | Pt | 0 | 0 | 0.00000 |
| HETATM | 39 | Pt | 2.01135 | 4.03525 | 26.43606 | Pt | 0 | 0 | 0.00000 |
| HETATM | 40 | Pt | 4.77045 | 3.61449 | 26.43606 | Pt | 0 | 0 | 0.00000 |
| HETATM | 41 | Pt | 0.27852 | 1.93161 | 27.03867 | Pt | 0 | 0 | 0.00000 |
| HETATM | 42 | Pt | 3.03762 | 1.51086 | 27.03867 | Pt | 0 | 0 | 0.00000 |
| HETATM | 43 | Pt | 1.30605 | 8.66274 | 27.63998 | Pt | 0 | 0 | 0.00000 |
| HETATM | 44 | Pt | 4.06515 | 8.24198 | 27.63998 | Pt | 0 | 0 | 0.00000 |
| HETATM | 45 | Pt | 2.33183 | 6.13855 | 28.24190 | Pt | 0 | 0 | 0.00000 |
| HETATM | 46 | Pt | 5.09093 | 5.71779 | 28.24190 | Pt | 0 | 0 | 0.00000 |
| HETATM | 47 | Pt | 0.59943 | 4.03448 | 28.84396 | Pt | 0 | 0 | 0.00000 |
| HETATM | 48 | Pt | 3.35853 | 3.61372 | 28.84396 | Pt | 0 | 0 | 0.00000 |
| HETATM | 49 | Pt | 1.62521 | 1.51016 | 29.44624 | Pt | 0 | 0 | 0.00000 |
| HETATM | 50 | Pt | 4.38431 | 1.08940 | 29.44624 | Pt | 0 | 0 | 0.00000 |
| HETATM | 51 | Pt | 2.65189 | 8.24161 | 30.04747 | Pt | 0 | 0 | 0.00000 |
| HETATM | 52 | Pt | 5.41100 | 7.82085 | 30.04747 | Pt | 0 | 0 | 0.00000 |
| HETATM | 53 | Pt | 0.92018 | 6.13748 | 30.64967 | Pt | 0 | 0 | 0.00000 |
| HETATM | 54 | Pt | 3.67928 | 5.71672 | 30.64967 | Pt | 0 | 0 | 0.00000 |
| HETATM | 55 | Pt | 1.94637 | 3.61274 | 31.25206 | Pt | 0 | 0 | 0.00000 |
| HETATM | 56 | Pt | 4.70547 | 3.19198 | 31.25206 | Pt | 0 | 0 | 0.00000 |
| HETATM | 57 | Pt | 0.21401 | 1.50905 | 31.85393 | Pt | 0 | 0 | 0.00000 |
| HETATM | 58 | Pt | 2.97311 | 1.08830 | 31.85393 | Pt | 0 | 0 | 0.00000 |
| HETATM | 59 | Pt | 1.24040 | 8.24039 | 32.45538 | Pt | 0 | 0 | 0.00000 |
| HETATM | 60 | Pt | 3.99950 | 7.81964 | 32.45538 | Pt | 0 | 0 | 0.00000 |
| HETATM | 61 | Pt | 2.26691 | 5.71526 | 33.05811 | Pt | 0 | 0 | 0.00000 |
| HETATM | 62 | Pt | 5.02601 | 5.29450 | 33.05811 | Pt | 0 | 0 | 0.00000 |
| HETATM | 63 | Pt | 0.53410 | 3.61147 | 33.66043 | Pt | 0 | 0 | 0.00000 |
| HETATM | 64 | Pt | 3.29321 | 3.19071 | 33.66043 | Pt | 0 | 0 | 0.00000 |
| HETATM | 65 | Pt | 1.56055 | 1.08633 | 34.26150 | Pt | 0 | 0 | 0.00000 |

|        |    |    |         |         |          |    |   |   |         |
|--------|----|----|---------|---------|----------|----|---|---|---------|
| HETATM | 66 | Pt | 4.31966 | 0.66557 | 34.26150 | Pt | 0 | 0 | 0.00000 |
| HETATM | 67 | Pt | 2.58713 | 7.81784 | 34.86333 | Pt | 0 | 0 | 0.00000 |
| HETATM | 68 | Pt | 5.34622 | 7.39708 | 34.86333 | Pt | 0 | 0 | 0.00000 |
| HETATM | 69 | Pt | 0.85420 | 5.71340 | 35.46674 | Pt | 0 | 0 | 0.00000 |
| HETATM | 70 | Pt | 3.61330 | 5.29264 | 35.46674 | Pt | 0 | 0 | 0.00000 |
| HETATM | 71 | Pt | 1.88070 | 3.18871 | 36.06897 | Pt | 0 | 0 | 0.00000 |
| HETATM | 72 | Pt | 4.63981 | 2.76795 | 36.06897 | Pt | 0 | 0 | 0.00000 |
| HETATM | 73 | Pt | 0.14809 | 1.08432 | 36.66876 | Pt | 0 | 0 | 0.00000 |
| HETATM | 74 | Pt | 2.90720 | 0.66356 | 36.66877 | Pt | 0 | 0 | 0.00000 |
| HETATM | 75 | Pt | 1.17467 | 7.81547 | 37.27150 | Pt | 0 | 0 | 0.00000 |
| HETATM | 76 | Pt | 3.93377 | 7.39472 | 37.27150 | Pt | 0 | 0 | 0.00000 |
| HETATM | 77 | Pt | 2.20054 | 5.28980 | 37.87563 | Pt | 0 | 0 | 0.00000 |
| HETATM | 78 | Pt | 4.95965 | 4.86904 | 37.87563 | Pt | 0 | 0 | 0.00000 |
| HETATM | 79 | Pt | 0.46813 | 3.18600 | 38.47787 | Pt | 0 | 0 | 0.00000 |
| HETATM | 80 | Pt | 3.22723 | 2.76524 | 38.47787 | Pt | 0 | 0 | 0.00000 |
| HETATM | 81 | Pt | 1.49474 | 0.66164 | 39.07537 | Pt | 0 | 0 | 0.00000 |
| HETATM | 82 | Pt | 4.25384 | 0.24088 | 39.07537 | Pt | 0 | 0 | 0.00000 |
| HETATM | 83 | Pt | 2.52101 | 7.39037 | 39.68121 | Pt | 0 | 0 | 0.00000 |
| HETATM | 84 | Pt | 5.28011 | 6.96961 | 39.68122 | Pt | 0 | 0 | 0.00000 |
| HETATM | 85 | Pt | 0.78755 | 5.28360 | 40.28921 | Pt | 0 | 0 | 0.00000 |
| HETATM | 86 | Pt | 3.54666 | 4.86285 | 40.28921 | Pt | 0 | 0 | 0.00000 |
| HETATM | 87 | Pt | 1.81319 | 2.75115 | 40.89144 | Pt | 0 | 0 | 0.00000 |
| HETATM | 88 | Pt | 4.57230 | 2.33039 | 40.89144 | Pt | 0 | 0 | 0.00000 |
| HETATM | 89 | Pt | 0.07884 | 0.63491 | 41.49340 | Pt | 0 | 0 | 0.00000 |
| HETATM | 90 | Pt | 2.83794 | 0.21415 | 41.49339 | Pt | 0 | 0 | 0.00000 |

UNIT ENERGY kcal  
ENERGY -11696.098575  
END

XTLGRF 200  
DESCRP A0195  
REMARK 2x1-bridge-{100}-step  
FIXATOMS 35 58  
CRYSTX 5.58200 9.25650 56.48410 90.00000 90.00000 98.67070  
FORMAT ATOM (a6,1x,i5,1x,a5,1x,a3,1x,a1,1x,a5,3f10.5,1x,a5,i3,i2,1x,f8.5)  

|        |    |    |         |         |          |    |   |   |         |
|--------|----|----|---------|---------|----------|----|---|---|---------|
| HETATM | 1  | Pt | 1.90549 | 2.87676 | 14.88718 | Pt | 0 | 0 | 0.00000 |
| HETATM | 2  | Pt | 4.52596 | 2.47790 | 14.89022 | Pt | 0 | 0 | 0.00000 |
| HETATM | 3  | Pt | 0.08814 | 0.70789 | 15.56101 | Pt | 0 | 0 | 0.00000 |
| HETATM | 4  | Pt | 2.84457 | 0.26909 | 15.61445 | Pt | 0 | 0 | 0.00000 |
| HETATM | 5  | Pt | 1.10824 | 7.41891 | 16.18951 | Pt | 0 | 0 | 0.00000 |
| HETATM | 6  | Pt | 3.87259 | 6.99646 | 16.18942 | Pt | 0 | 0 | 0.00000 |
| HETATM | 7  | Pt | 2.13500 | 4.88532 | 16.79010 | Pt | 0 | 0 | 0.00000 |
| HETATM | 8  | Pt | 4.89656 | 4.46367 | 16.79232 | Pt | 0 | 0 | 0.00000 |
| HETATM | 9  | Pt | 0.40423 | 2.77700 | 17.45168 | Pt | 0 | 0 | 0.00000 |
| HETATM | 10 | Pt | 3.16403 | 2.36338 | 17.38131 | Pt | 0 | 0 | 0.00000 |
| HETATM | 11 | Pt | 1.42867 | 9.51187 | 18.00574 | Pt | 0 | 0 | 0.00000 |
| HETATM | 12 | Pt | 4.19195 | 9.09051 | 18.00550 | Pt | 0 | 0 | 0.00000 |
| HETATM | 13 | Pt | 2.45741 | 6.98739 | 18.60176 | Pt | 0 | 0 | 0.00000 |
| HETATM | 14 | Pt | 5.21594 | 6.56561 | 18.60455 | Pt | 0 | 0 | 0.00000 |
| HETATM | 15 | Pt | 0.72584 | 4.88771 | 19.21261 | Pt | 0 | 0 | 0.00000 |
| HETATM | 16 | Pt | 3.48317 | 4.45987 | 19.20317 | Pt | 0 | 0 | 0.00000 |
| HETATM | 17 | Pt | 1.75720 | 2.35658 | 19.81935 | Pt | 0 | 0 | 0.00000 |
| HETATM | 18 | Pt | 4.50546 | 1.93768 | 19.81909 | Pt | 0 | 0 | 0.00000 |
| HETATM | 19 | Pt | 2.77842 | 9.08703 | 20.41451 | Pt | 0 | 0 | 0.00000 |
| HETATM | 20 | Pt | 5.53775 | 8.66939 | 20.41415 | Pt | 0 | 0 | 0.00000 |
| HETATM | 21 | Pt | 1.04636 | 6.98631 | 21.01555 | Pt | 0 | 0 | 0.00000 |
| HETATM | 22 | Pt | 3.80508 | 6.56314 | 21.01320 | Pt | 0 | 0 | 0.00000 |
| HETATM | 23 | Pt | 2.07375 | 4.46049 | 21.61866 | Pt | 0 | 0 | 0.00000 |
| HETATM | 24 | Pt | 4.83144 | 4.04000 | 21.61840 | Pt | 0 | 0 | 0.00000 |
| HETATM | 25 | Pt | 0.34097 | 2.35618 | 22.22299 | Pt | 0 | 0 | 0.00000 |
| HETATM | 26 | Pt | 3.10006 | 1.93437 | 22.22536 | Pt | 0 | 0 | 0.00000 |
| HETATM | 27 | Pt | 1.36821 | 9.08776 | 22.82355 | Pt | 0 | 0 | 0.00000 |
| HETATM | 28 | Pt | 4.12756 | 8.66621 | 22.82294 | Pt | 0 | 0 | 0.00000 |

|        |    |    |         |         |          |    |   |   |         |
|--------|----|----|---------|---------|----------|----|---|---|---------|
| HETATM | 29 | Pt | 2.39528 | 6.56364 | 23.42458 | Pt | 0 | 0 | 0.00000 |
| HETATM | 30 | Pt | 5.15413 | 6.14282 | 23.42460 | Pt | 0 | 0 | 0.00000 |
| HETATM | 31 | Pt | 0.66284 | 4.46044 | 24.02736 | Pt | 0 | 0 | 0.00000 |
| HETATM | 32 | Pt | 3.42203 | 4.03963 | 24.02783 | Pt | 0 | 0 | 0.00000 |
| HETATM | 33 | Pt | 1.69002 | 1.93637 | 24.63087 | Pt | 0 | 0 | 0.00000 |
| HETATM | 34 | Pt | 4.44945 | 1.51533 | 24.63074 | Pt | 0 | 0 | 0.00000 |
| HETATM | 35 | Pt | 2.71901 | 8.66951 | 25.23200 | Pt | 0 | 0 | 0.00000 |
| HETATM | 36 | Pt | 5.47811 | 8.24876 | 25.23200 | Pt | 0 | 0 | 0.00000 |
| HETATM | 37 | Pt | 0.98609 | 6.56566 | 25.83377 | Pt | 0 | 0 | 0.00000 |
| HETATM | 38 | Pt | 3.74519 | 6.14491 | 25.83376 | Pt | 0 | 0 | 0.00000 |
| HETATM | 39 | Pt | 2.01221 | 4.04092 | 26.43606 | Pt | 0 | 0 | 0.00000 |
| HETATM | 40 | Pt | 4.77131 | 3.62016 | 26.43606 | Pt | 0 | 0 | 0.00000 |
| HETATM | 41 | Pt | 0.27938 | 1.93728 | 27.03867 | Pt | 0 | 0 | 0.00000 |
| HETATM | 42 | Pt | 3.03848 | 1.51653 | 27.03867 | Pt | 0 | 0 | 0.00000 |
| HETATM | 43 | Pt | 1.30691 | 8.66841 | 27.63998 | Pt | 0 | 0 | 0.00000 |
| HETATM | 44 | Pt | 4.06601 | 8.24765 | 27.63998 | Pt | 0 | 0 | 0.00000 |
| HETATM | 45 | Pt | 2.33269 | 6.14422 | 28.24190 | Pt | 0 | 0 | 0.00000 |
| HETATM | 46 | Pt | 5.09179 | 5.72346 | 28.24190 | Pt | 0 | 0 | 0.00000 |
| HETATM | 47 | Pt | 0.60029 | 4.04015 | 28.84396 | Pt | 0 | 0 | 0.00000 |
| HETATM | 48 | Pt | 3.35939 | 3.61939 | 28.84396 | Pt | 0 | 0 | 0.00000 |
| HETATM | 49 | Pt | 1.62607 | 1.51583 | 29.44624 | Pt | 0 | 0 | 0.00000 |
| HETATM | 50 | Pt | 4.38517 | 1.09507 | 29.44624 | Pt | 0 | 0 | 0.00000 |
| HETATM | 51 | Pt | 2.65275 | 8.24728 | 30.04747 | Pt | 0 | 0 | 0.00000 |
| HETATM | 52 | Pt | 5.41186 | 7.82652 | 30.04747 | Pt | 0 | 0 | 0.00000 |
| HETATM | 53 | Pt | 0.92104 | 6.14315 | 30.64967 | Pt | 0 | 0 | 0.00000 |
| HETATM | 54 | Pt | 3.68014 | 5.72239 | 30.64967 | Pt | 0 | 0 | 0.00000 |
| HETATM | 55 | Pt | 1.94723 | 3.61841 | 31.25206 | Pt | 0 | 0 | 0.00000 |
| HETATM | 56 | Pt | 4.70633 | 3.19765 | 31.25206 | Pt | 0 | 0 | 0.00000 |
| HETATM | 57 | Pt | 0.21487 | 1.51472 | 31.85393 | Pt | 0 | 0 | 0.00000 |
| HETATM | 58 | Pt | 2.97397 | 1.09397 | 31.85393 | Pt | 0 | 0 | 0.00000 |
| HETATM | 59 | Pt | 1.24229 | 8.24735 | 32.45641 | Pt | 0 | 0 | 0.00000 |
| HETATM | 60 | Pt | 4.00145 | 7.82663 | 32.45685 | Pt | 0 | 0 | 0.00000 |
| HETATM | 61 | Pt | 2.26950 | 5.72358 | 33.05956 | Pt | 0 | 0 | 0.00000 |
| HETATM | 62 | Pt | 5.02885 | 5.30289 | 33.05953 | Pt | 0 | 0 | 0.00000 |
| HETATM | 63 | Pt | 0.53722 | 3.62090 | 33.66127 | Pt | 0 | 0 | 0.00000 |
| HETATM | 64 | Pt | 3.29657 | 3.19942 | 33.66073 | Pt | 0 | 0 | 0.00000 |
| HETATM | 65 | Pt | 1.56409 | 1.09645 | 34.25937 | Pt | 0 | 0 | 0.00000 |
| HETATM | 66 | Pt | 4.32320 | 0.67466 | 34.26165 | Pt | 0 | 0 | 0.00000 |
| HETATM | 67 | Pt | 2.59029 | 7.82705 | 34.86582 | Pt | 0 | 0 | 0.00000 |
| HETATM | 68 | Pt | 5.35080 | 7.40604 | 34.86606 | Pt | 0 | 0 | 0.00000 |
| HETATM | 69 | Pt | 0.85907 | 5.72452 | 35.47111 | Pt | 0 | 0 | 0.00000 |
| HETATM | 70 | Pt | 3.61779 | 5.30138 | 35.46880 | Pt | 0 | 0 | 0.00000 |
| HETATM | 71 | Pt | 1.88574 | 3.20078 | 36.06997 | Pt | 0 | 0 | 0.00000 |
| HETATM | 72 | Pt | 4.64463 | 2.77691 | 36.07035 | Pt | 0 | 0 | 0.00000 |
| HETATM | 73 | Pt | 0.15849 | 1.09377 | 36.66564 | Pt | 0 | 0 | 0.00000 |
| HETATM | 74 | Pt | 2.90677 | 0.67486 | 36.66538 | Pt | 0 | 0 | 0.00000 |
| HETATM | 75 | Pt | 1.18064 | 7.82818 | 37.28139 | Pt | 0 | 0 | 0.00000 |
| HETATM | 76 | Pt | 3.93801 | 7.40035 | 37.27196 | Pt | 0 | 0 | 0.00000 |
| HETATM | 77 | Pt | 2.20641 | 5.30068 | 37.88270 | Pt | 0 | 0 | 0.00000 |
| HETATM | 78 | Pt | 4.96609 | 4.88098 | 37.87997 | Pt | 0 | 0 | 0.00000 |
| HETATM | 79 | Pt | 0.47192 | 3.19763 | 38.47919 | Pt | 0 | 0 | 0.00000 |
| HETATM | 80 | Pt | 3.23518 | 2.77626 | 38.47895 | Pt | 0 | 0 | 0.00000 |
| HETATM | 81 | Pt | 1.49981 | 0.66827 | 39.10350 | Pt | 0 | 0 | 0.00000 |
| HETATM | 82 | Pt | 4.25963 | 0.25465 | 39.03312 | Pt | 0 | 0 | 0.00000 |
| HETATM | 83 | Pt | 2.52869 | 7.40278 | 39.69440 | Pt | 0 | 0 | 0.00000 |
| HETATM | 84 | Pt | 5.28533 | 6.98302 | 39.69239 | Pt | 0 | 0 | 0.00000 |
| HETATM | 85 | Pt | 0.79109 | 5.29170 | 40.29518 | Pt | 0 | 0 | 0.00000 |
| HETATM | 86 | Pt | 3.55541 | 4.86926 | 40.29510 | Pt | 0 | 0 | 0.00000 |
| HETATM | 87 | Pt | 1.81915 | 2.76249 | 40.87046 | Pt | 0 | 0 | 0.00000 |
| HETATM | 88 | Pt | 4.57560 | 2.32381 | 40.92382 | Pt | 0 | 0 | 0.00000 |
| HETATM | 89 | Pt | 0.13826 | 0.55353 | 41.59490 | Pt | 0 | 0 | 0.00000 |
| HETATM | 90 | Pt | 2.75868 | 0.15452 | 41.59751 | Pt | 0 | 0 | 0.00000 |
| HETATM | 91 | O  | 1.39775 | 0.03189 | 42.82258 | O  | 0 | 0 | 0.00000 |

HETATM 92 O 3.26659 2.99873 13.66214 O 0 0 0.00000  
UNIT ENERGY kcal  
ENERGY -11877.433013  
END

XTLGRF 200

DESCRP A0276

REMARK 2x1-fcc-bridge-{100}-step

FIXATOMS 35 58

CRYSTX 5.58200 9.25650 56.48410 90.00000 90.00000 98.67070

FORMAT ATOM (a6,lx,i5,lx,a5,lx,a3,lx,a1,lx,a5,3f10.5,lx,a5,i3,i2,lx,f8.5)

|        |    |    |         |         |          |    |   |   |         |
|--------|----|----|---------|---------|----------|----|---|---|---------|
| HETATM | 1  | Pt | 2.01399 | 2.90409 | 14.63399 | Pt | 0 | 0 | 0.00000 |
| HETATM | 2  | Pt | 4.64672 | 2.62207 | 14.91625 | Pt | 0 | 0 | 0.00000 |
| HETATM | 3  | Pt | 0.14415 | 0.77491 | 15.47789 | Pt | 0 | 0 | 0.00000 |
| HETATM | 4  | Pt | 2.84223 | 0.31772 | 15.51891 | Pt | 0 | 0 | 0.00000 |
| HETATM | 5  | Pt | 1.12212 | 7.42085 | 16.21790 | Pt | 0 | 0 | 0.00000 |
| HETATM | 6  | Pt | 3.88410 | 6.99915 | 16.17410 | Pt | 0 | 0 | 0.00000 |
| HETATM | 7  | Pt | 2.13492 | 4.87582 | 16.78023 | Pt | 0 | 0 | 0.00000 |
| HETATM | 8  | Pt | 4.90708 | 4.50261 | 16.84478 | Pt | 0 | 0 | 0.00000 |
| HETATM | 9  | Pt | 0.42646 | 2.78429 | 17.43080 | Pt | 0 | 0 | 0.00000 |
| HETATM | 10 | Pt | 3.17940 | 2.37176 | 17.33628 | Pt | 0 | 0 | 0.00000 |
| HETATM | 11 | Pt | 1.44667 | 9.52306 | 17.98141 | Pt | 0 | 0 | 0.00000 |
| HETATM | 12 | Pt | 4.20436 | 9.09770 | 18.04972 | Pt | 0 | 0 | 0.00000 |
| HETATM | 13 | Pt | 2.47065 | 6.98825 | 18.60488 | Pt | 0 | 0 | 0.00000 |
| HETATM | 14 | Pt | 5.22915 | 6.58453 | 18.62317 | Pt | 0 | 0 | 0.00000 |
| HETATM | 15 | Pt | 0.73855 | 4.89534 | 19.22024 | Pt | 0 | 0 | 0.00000 |
| HETATM | 16 | Pt | 3.48745 | 4.46602 | 19.20832 | Pt | 0 | 0 | 0.00000 |
| HETATM | 17 | Pt | 1.77020 | 2.36253 | 19.80424 | Pt | 0 | 0 | 0.00000 |
| HETATM | 18 | Pt | 4.51706 | 1.95362 | 19.80995 | Pt | 0 | 0 | 0.00000 |
| HETATM | 19 | Pt | 2.78437 | 9.09669 | 20.41923 | Pt | 0 | 0 | 0.00000 |
| HETATM | 20 | Pt | 5.55457 | 8.68325 | 20.42231 | Pt | 0 | 0 | 0.00000 |
| HETATM | 21 | Pt | 1.05691 | 6.99585 | 21.02205 | Pt | 0 | 0 | 0.00000 |
| HETATM | 22 | Pt | 3.81415 | 6.57495 | 21.01816 | Pt | 0 | 0 | 0.00000 |
| HETATM | 23 | Pt | 2.08190 | 4.46936 | 21.62034 | Pt | 0 | 0 | 0.00000 |
| HETATM | 24 | Pt | 4.83902 | 4.05192 | 21.62024 | Pt | 0 | 0 | 0.00000 |
| HETATM | 25 | Pt | 0.34940 | 2.36923 | 22.21887 | Pt | 0 | 0 | 0.00000 |
| HETATM | 26 | Pt | 3.10753 | 1.94581 | 22.22061 | Pt | 0 | 0 | 0.00000 |
| HETATM | 27 | Pt | 1.37520 | 9.09923 | 22.82744 | Pt | 0 | 0 | 0.00000 |
| HETATM | 28 | Pt | 4.13430 | 8.67814 | 22.82457 | Pt | 0 | 0 | 0.00000 |
| HETATM | 29 | Pt | 2.40131 | 6.57312 | 23.42650 | Pt | 0 | 0 | 0.00000 |
| HETATM | 30 | Pt | 5.15969 | 6.15294 | 23.42649 | Pt | 0 | 0 | 0.00000 |
| HETATM | 31 | Pt | 0.66747 | 4.46948 | 24.02759 | Pt | 0 | 0 | 0.00000 |
| HETATM | 32 | Pt | 3.42676 | 4.04810 | 24.02804 | Pt | 0 | 0 | 0.00000 |
| HETATM | 33 | Pt | 1.69378 | 1.94459 | 24.62980 | Pt | 0 | 0 | 0.00000 |
| HETATM | 34 | Pt | 4.45307 | 1.52332 | 24.62938 | Pt | 0 | 0 | 0.00000 |
| HETATM | 35 | Pt | 2.71997 | 8.67491 | 25.23186 | Pt | 0 | 0 | 0.00000 |
| HETATM | 36 | Pt | 5.47907 | 8.25416 | 25.23186 | Pt | 0 | 0 | 0.00000 |
| HETATM | 37 | Pt | 0.98705 | 6.57106 | 25.83363 | Pt | 0 | 0 | 0.00000 |
| HETATM | 38 | Pt | 3.74615 | 6.15031 | 25.83362 | Pt | 0 | 0 | 0.00000 |
| HETATM | 39 | Pt | 2.01317 | 4.04632 | 26.43592 | Pt | 0 | 0 | 0.00000 |
| HETATM | 40 | Pt | 4.77227 | 3.62556 | 26.43592 | Pt | 0 | 0 | 0.00000 |
| HETATM | 41 | Pt | 0.28034 | 1.94268 | 27.03853 | Pt | 0 | 0 | 0.00000 |
| HETATM | 42 | Pt | 3.03944 | 1.52193 | 27.03853 | Pt | 0 | 0 | 0.00000 |
| HETATM | 43 | Pt | 1.30787 | 8.67381 | 27.63984 | Pt | 0 | 0 | 0.00000 |
| HETATM | 44 | Pt | 4.06697 | 8.25305 | 27.63984 | Pt | 0 | 0 | 0.00000 |
| HETATM | 45 | Pt | 2.33365 | 6.14962 | 28.24176 | Pt | 0 | 0 | 0.00000 |
| HETATM | 46 | Pt | 5.09275 | 5.72886 | 28.24176 | Pt | 0 | 0 | 0.00000 |
| HETATM | 47 | Pt | 0.60125 | 4.04555 | 28.84382 | Pt | 0 | 0 | 0.00000 |
| HETATM | 48 | Pt | 3.36035 | 3.62479 | 28.84382 | Pt | 0 | 0 | 0.00000 |
| HETATM | 49 | Pt | 1.62703 | 1.52123 | 29.44610 | Pt | 0 | 0 | 0.00000 |
| HETATM | 50 | Pt | 4.38613 | 1.10047 | 29.44610 | Pt | 0 | 0 | 0.00000 |
| HETATM | 51 | Pt | 2.65371 | 8.25268 | 30.04733 | Pt | 0 | 0 | 0.00000 |
| HETATM | 52 | Pt | 5.41282 | 7.83192 | 30.04733 | Pt | 0 | 0 | 0.00000 |

|        |    |    |         |          |          |    |   |   |         |
|--------|----|----|---------|----------|----------|----|---|---|---------|
| HETATM | 53 | Pt | 0.92200 | 6.14855  | 30.64953 | Pt | 0 | 0 | 0.00000 |
| HETATM | 54 | Pt | 3.68110 | 5.72779  | 30.64953 | Pt | 0 | 0 | 0.00000 |
| HETATM | 55 | Pt | 1.94819 | 3.62381  | 31.25192 | Pt | 0 | 0 | 0.00000 |
| HETATM | 56 | Pt | 4.70729 | 3.20305  | 31.25192 | Pt | 0 | 0 | 0.00000 |
| HETATM | 57 | Pt | 0.21583 | 1.52012  | 31.85379 | Pt | 0 | 0 | 0.00000 |
| HETATM | 58 | Pt | 2.97493 | 1.09937  | 31.85379 | Pt | 0 | 0 | 0.00000 |
| HETATM | 59 | Pt | 1.24049 | 8.25129  | 32.45472 | Pt | 0 | 0 | 0.00000 |
| HETATM | 60 | Pt | 3.99974 | 7.83004  | 32.45512 | Pt | 0 | 0 | 0.00000 |
| HETATM | 61 | Pt | 2.26582 | 5.72591  | 33.05636 | Pt | 0 | 0 | 0.00000 |
| HETATM | 62 | Pt | 5.02564 | 5.30459  | 33.05636 | Pt | 0 | 0 | 0.00000 |
| HETATM | 63 | Pt | 0.53280 | 3.62057  | 33.65871 | Pt | 0 | 0 | 0.00000 |
| HETATM | 64 | Pt | 3.29191 | 3.19964  | 33.65600 | Pt | 0 | 0 | 0.00000 |
| HETATM | 65 | Pt | 1.55941 | 1.09593  | 34.26230 | Pt | 0 | 0 | 0.00000 |
| HETATM | 66 | Pt | 4.31763 | 0.67252  | 34.26389 | Pt | 0 | 0 | 0.00000 |
| HETATM | 67 | Pt | 2.58454 | 7.82842  | 34.86237 | Pt | 0 | 0 | 0.00000 |
| HETATM | 68 | Pt | 5.34559 | 7.40435  | 34.86240 | Pt | 0 | 0 | 0.00000 |
| HETATM | 69 | Pt | 0.85220 | 5.72247  | 35.46467 | Pt | 0 | 0 | 0.00000 |
| HETATM | 70 | Pt | 3.60948 | 5.30155  | 35.46083 | Pt | 0 | 0 | 0.00000 |
| HETATM | 71 | Pt | 1.88203 | 3.20010  | 36.06362 | Pt | 0 | 0 | 0.00000 |
| HETATM | 72 | Pt | 4.63009 | 2.77207  | 36.06059 | Pt | 0 | 0 | 0.00000 |
| HETATM | 73 | Pt | 0.14912 | 1.08613  | 36.67258 | Pt | 0 | 0 | 0.00000 |
| HETATM | 74 | Pt | 2.89610 | 0.67718  | 36.67827 | Pt | 0 | 0 | 0.00000 |
| HETATM | 75 | Pt | 1.17838 | 7.82986  | 37.27441 | Pt | 0 | 0 | 0.00000 |
| HETATM | 76 | Pt | 3.92741 | 7.40044  | 37.26255 | Pt | 0 | 0 | 0.00000 |
| HETATM | 77 | Pt | 2.19542 | 5.30712  | 37.87782 | Pt | 0 | 0 | 0.00000 |
| HETATM | 78 | Pt | 4.95523 | 4.86949  | 37.85972 | Pt | 0 | 0 | 0.00000 |
| HETATM | 79 | Pt | 0.46227 | 3.19724  | 38.43288 | Pt | 0 | 0 | 0.00000 |
| HETATM | 80 | Pt | 3.22003 | 2.77192  | 38.50095 | Pt | 0 | 0 | 0.00000 |
| HETATM | 81 | Pt | 1.48733 | 0.66648  | 39.14569 | Pt | 0 | 0 | 0.00000 |
| HETATM | 82 | Pt | 4.23996 | 0.25365  | 39.05165 | Pt | 0 | 0 | 0.00000 |
| HETATM | 83 | Pt | 2.53068 | 7.41853  | 39.70221 | Pt | 0 | 0 | 0.00000 |
| HETATM | 84 | Pt | 5.27705 | 6.95072  | 39.63866 | Pt | 0 | 0 | 0.00000 |
| HETATM | 85 | Pt | 0.78210 | 5.29503  | 40.30866 | Pt | 0 | 0 | 0.00000 |
| HETATM | 86 | Pt | 3.54413 | 4.87363  | 40.26469 | Pt | 0 | 0 | 0.00000 |
| HETATM | 87 | Pt | 1.82676 | 2.71954  | 40.96372 | Pt | 0 | 0 | 0.00000 |
| HETATM | 88 | Pt | 4.52458 | 2.26241  | 41.00338 | Pt | 0 | 0 | 0.00000 |
| HETATM | 89 | Pt | 0.02456 | 0.41720  | 41.56628 | Pt | 0 | 0 | 0.00000 |
| HETATM | 90 | Pt | 2.65710 | 0.13234  | 41.84769 | Pt | 0 | 0 | 0.00000 |
| HETATM | 91 | O  | 1.11454 | -0.19413 | 42.86953 | O  | 0 | 0 | 0.00000 |
| HETATM | 92 | O  | 3.07494 | 2.13521  | 42.27028 | O  | 0 | 0 | 0.00000 |
| HETATM | 93 | O  | 3.55659 | 3.23495  | 13.61383 | O  | 0 | 0 | 0.00000 |
| HETATM | 94 | O  | 1.59572 | 0.90196  | 14.21153 | O  | 0 | 0 | 0.00000 |

UNIT ENERGY    kcal  
 ENERGY        -12066.160612  
 END

XTLGRF 200  
 DESCRP A0150  
 REMARK 1x1-fcc-top-{100}-step  
 FIXATOMS    18       29  
 CRYSTX       2.79100    9.25650    56.48410    90.00000    90.00000    98.67070  
 FORMAT ATOM    (a6,1x,i5,1x,a5,1x,a3,1x,a1,1x,a5,3f10.5,1x,a5,i3,i2,1x,f8.5)  

|        |    |    |         |         |          |    |   |   |         |
|--------|----|----|---------|---------|----------|----|---|---|---------|
| HETATM | 1  | Pt | 1.80808 | 2.67668 | 14.38218 | Pt | 0 | 0 | 0.00000 |
| HETATM | 2  | Pt | 0.07445 | 0.58798 | 15.48215 | Pt | 0 | 0 | 0.00000 |
| HETATM | 3  | Pt | 1.09078 | 7.20865 | 16.28967 | Pt | 0 | 0 | 0.00000 |
| HETATM | 4  | Pt | 2.10204 | 4.58335 | 16.39877 | Pt | 0 | 0 | 0.00000 |
| HETATM | 5  | Pt | 0.38658 | 2.59366 | 17.32397 | Pt | 0 | 0 | 0.00000 |
| HETATM | 6  | Pt | 1.41247 | 9.32262 | 18.06333 | Pt | 0 | 0 | 0.00000 |
| HETATM | 7  | Pt | 2.43728 | 6.78485 | 18.64668 | Pt | 0 | 0 | 0.00000 |
| HETATM | 8  | Pt | 0.70441 | 4.67988 | 19.16819 | Pt | 0 | 0 | 0.00000 |
| HETATM | 9  | Pt | 1.73278 | 2.16791 | 19.78869 | Pt | 0 | 0 | 0.00000 |
| HETATM | 10 | Pt | 2.75840 | 8.89438 | 20.44505 | Pt | 0 | 0 | 0.00000 |
| HETATM | 11 | Pt | 1.02470 | 6.78336 | 21.03011 | Pt | 0 | 0 | 0.00000 |

[illegible]
