# Supplementary material for: Development of a ReaxFF potential for Pt–O systems describing the energetics and dynamics of Pt-oxide formation
Source: Royal Society of Chemistry journal article supplement (doi:10.1039/c4cp03111c), 2014-01-01
Supplement: c4cp03111c1.zip [file c4cp03111c1.zip]

```

XTLGRF 200
DESCRP IS
REMARK Pt111_4x4x7_30.0_vac "top"-diffusion
FIXATOMS      1      32
CRYSTX      11.16485      11.16485      43.67409      90.00000      90.00000      60.00000
FORMAT ATOM      (a6,lx,i5,lx,a5,lx,a3,lx,a1,lx,a5,3f10.5,lx,a5,i3,i2,lx,f8.5)
HETATM      1 Pt      1.26492      9.26914      14.99394      Pt      1 0      0.00000
HETATM      2 Pt      1.26492      0.89550      14.99394      Pt      1 0      0.00000
HETATM      3 Pt      1.26492      3.68671      14.99394      Pt      1 0      0.00000
HETATM      4 Pt      1.26492      6.47793      14.99394      Pt      1 0      0.00000
HETATM      5 Pt      3.68218      10.66475      14.99394      Pt      1 0      0.00000
HETATM      6 Pt      3.68218      2.29111      14.99394      Pt      1 0      0.00000
HETATM      7 Pt      3.68218      5.08232      14.99394      Pt      1 0      0.00000
HETATM      8 Pt      3.68218      7.87353      14.99394      Pt      1 0      0.00000
HETATM      9 Pt      6.09944      12.06035      14.99394      Pt      1 0      0.00000
HETATM     10 Pt      6.09944      3.68671      14.99394      Pt      1 0      0.00000
HETATM     11 Pt      6.09944      6.47793      14.99394      Pt      1 0      0.00000
HETATM     12 Pt      6.09944      9.26914      14.99394      Pt      1 0      0.00000
HETATM     13 Pt      8.51670      13.45596      14.99394      Pt      1 0      0.00000
HETATM     14 Pt      8.51670      5.08232      14.99394      Pt      1 0      0.00000
HETATM     15 Pt      8.51670      7.87353      14.99394      Pt      1 0      0.00000
HETATM     16 Pt      8.51670      10.66474      14.99394      Pt      1 0      0.00000
HETATM     17 Pt      2.07067      10.66475      17.27296      Pt      1 0      0.00000
HETATM     18 Pt      2.07067      2.29111      17.27296      Pt      1 0      0.00000
HETATM     19 Pt      2.07067      5.08232      17.27296      Pt      1 0      0.00000
HETATM     20 Pt      2.07067      7.87353      17.27296      Pt      1 0      0.00000
HETATM     21 Pt      4.48793      12.06035      17.27296      Pt      1 0      0.00000
HETATM     22 Pt      4.48793      3.68671      17.27296      Pt      1 0      0.00000
HETATM     23 Pt      4.48793      6.47793      17.27296      Pt      1 0      0.00000
HETATM     24 Pt      4.48793      9.26914      17.27296      Pt      1 0      0.00000
HETATM     25 Pt      6.90519      13.45596      17.27296      Pt      1 0      0.00000
HETATM     26 Pt      6.90519      5.08232      17.27296      Pt      1 0      0.00000
HETATM     27 Pt      6.90519      7.87353      17.27296      Pt      1 0      0.00000
HETATM     28 Pt      6.90519      10.66474      17.27296      Pt      1 0      0.00000
HETATM     29 Pt      9.32246      14.85156      17.27296      Pt      1 0      0.00000
HETATM     30 Pt      9.32246      6.47793      17.27296      Pt      1 0      0.00000
HETATM     31 Pt      9.32246      9.26914      17.27296      Pt      1 0      0.00000
HETATM     32 Pt      9.32246      12.06035      17.27296      Pt      1 0      0.00000
HETATM     33 Pt      2.87620      12.05995      19.55145      Pt      1 0      0.00000
HETATM     34 Pt      2.87620      3.68710      19.55145      Pt      1 0      0.00000
HETATM     35 Pt      2.87668      6.47822      19.55122      Pt      1 0      0.00000
HETATM     36 Pt      2.87668      9.26884      19.55122      Pt      1 0      0.00000
HETATM     37 Pt      5.29414      13.45595      19.55145      Pt      1 0      0.00000
HETATM     38 Pt      5.29423      5.08327      19.55284      Pt      1 0      0.00000
HETATM     39 Pt      5.29424      7.87353      19.55392      Pt      1 0      0.00000
HETATM     40 Pt      5.29424      10.66379      19.55284      Pt      1 0      0.00000
HETATM     41 Pt      7.71107      14.85193      19.55122      Pt      1 0      0.00000
HETATM     42 Pt      7.71067      6.47841      19.55392      Pt      1 0      0.00000
HETATM     43 Pt      7.71067      9.26865      19.55392      Pt      1 0      0.00000
HETATM     44 Pt      7.71107      12.05998      19.55121      Pt      1 0      0.00000
HETATM     45 Pt      0.45879      10.66481      19.55122      Pt      1 0      0.00000
HETATM     46 Pt      0.45807      2.29110      19.55284      Pt      1 0      0.00000
HETATM     47 Pt      0.45879      5.08224      19.55122      Pt      1 0      0.00000
HETATM     48 Pt      0.45917      7.87352      19.55031      Pt      1 0      0.00000
HETATM     49 Pt      1.26489      9.26908      21.82821      Pt      1 0      0.00000
HETATM     50 Pt      1.26363      0.89540      21.83023      Pt      1 0      0.00000
HETATM     51 Pt      1.26363      3.68681      21.83023      Pt      1 0      0.00000
HETATM     52 Pt      1.26489      6.47798      21.82821      Pt      1 0      0.00000
HETATM     53 Pt      3.68274      10.66357      21.83023      Pt      1 0      0.00000
HETATM     54 Pt      3.68218      2.29110      21.82783      Pt      1 0      0.00000
HETATM     55 Pt      3.68274      5.08348      21.83023      Pt      1 0      0.00000
HETATM     56 Pt      3.68247      7.87353      21.83111      Pt      1 0      0.00000
HETATM     57 Pt      6.10017      12.05928      21.83023      Pt      1 0      0.00000

```

|        |     |    |         |          |          |    |   |   |         |
|--------|-----|----|---------|----------|----------|----|---|---|---------|
| HETATM | 58  | Pt | 6.10017 | 3.68778  | 21.83023 | Pt | 1 | 0 | 0.00000 |
| HETATM | 59  | Pt | 6.10028 | 6.47938  | 21.83631 | Pt | 1 | 0 | 0.00000 |
| HETATM | 60  | Pt | 6.10028 | 9.26768  | 21.83631 | Pt | 1 | 0 | 0.00000 |
| HETATM | 61  | Pt | 8.51676 | 13.45595 | 21.82821 | Pt | 1 | 0 | 0.00000 |
| HETATM | 62  | Pt | 8.51656 | 5.08257  | 21.83111 | Pt | 1 | 0 | 0.00000 |
| HETATM | 63  | Pt | 8.51502 | 7.87353  | 21.83631 | Pt | 1 | 0 | 0.00000 |
| HETATM | 64  | Pt | 8.51656 | 10.66449 | 21.83111 | Pt | 1 | 0 | 0.00000 |
| HETATM | 65  | Pt | 2.07126 | 10.66576 | 24.10640 | Pt | 1 | 0 | 0.00000 |
| HETATM | 66  | Pt | 2.07194 | 2.29110  | 24.10578 | Pt | 1 | 0 | 0.00000 |
| HETATM | 67  | Pt | 2.07126 | 5.08130  | 24.10640 | Pt | 1 | 0 | 0.00000 |
| HETATM | 68  | Pt | 2.07012 | 7.87353  | 24.10630 | Pt | 1 | 0 | 0.00000 |
| HETATM | 69  | Pt | 4.48730 | 12.06144 | 24.10578 | Pt | 1 | 0 | 0.00000 |
| HETATM | 70  | Pt | 4.48730 | 3.68561  | 24.10578 | Pt | 1 | 0 | 0.00000 |
| HETATM | 71  | Pt | 4.48882 | 6.48053  | 24.11286 | Pt | 1 | 0 | 0.00000 |
| HETATM | 72  | Pt | 4.48882 | 9.26653  | 24.11286 | Pt | 1 | 0 | 0.00000 |
| HETATM | 73  | Pt | 6.90402 | 13.45595 | 24.10640 | Pt | 1 | 0 | 0.00000 |
| HETATM | 74  | Pt | 6.90701 | 5.08438  | 24.11286 | Pt | 1 | 0 | 0.00000 |
| HETATM | 75  | Pt | 6.90519 | 7.87353  | 24.12628 | Pt | 1 | 0 | 0.00000 |
| HETATM | 76  | Pt | 6.90701 | 10.66267 | 24.11286 | Pt | 1 | 0 | 0.00000 |
| HETATM | 77  | Pt | 9.32273 | 14.85108 | 24.10630 | Pt | 1 | 0 | 0.00000 |
| HETATM | 78  | Pt | 9.31976 | 6.47739  | 24.11286 | Pt | 1 | 0 | 0.00000 |
| HETATM | 79  | Pt | 9.31976 | 9.26967  | 24.11286 | Pt | 1 | 0 | 0.00000 |
| HETATM | 80  | Pt | 9.32273 | 12.06083 | 24.10630 | Pt | 1 | 0 | 0.00000 |
| HETATM | 81  | Pt | 2.87649 | 12.06045 | 26.39054 | Pt | 1 | 0 | 0.00000 |
| HETATM | 82  | Pt | 2.87649 | 3.68660  | 26.39054 | Pt | 1 | 0 | 0.00000 |
| HETATM | 83  | Pt | 2.87513 | 6.47490  | 26.38310 | Pt | 1 | 0 | 0.00000 |
| HETATM | 84  | Pt | 2.87513 | 9.27216  | 26.38310 | Pt | 1 | 0 | 0.00000 |
| HETATM | 85  | Pt | 5.29356 | 13.45595 | 26.39054 | Pt | 1 | 0 | 0.00000 |
| HETATM | 86  | Pt | 5.28774 | 5.07202  | 26.37641 | Pt | 1 | 0 | 0.00000 |
| HETATM | 87  | Pt | 5.29553 | 7.87353  | 26.41337 | Pt | 1 | 0 | 0.00000 |
| HETATM | 88  | Pt | 5.28774 | 10.67504 | 26.37641 | Pt | 1 | 0 | 0.00000 |
| HETATM | 89  | Pt | 7.70898 | 14.84893 | 26.38310 | Pt | 1 | 0 | 0.00000 |
| HETATM | 90  | Pt | 7.71002 | 6.47952  | 26.41337 | Pt | 1 | 0 | 0.00000 |
| HETATM | 91  | Pt | 7.71002 | 9.26754  | 26.41337 | Pt | 1 | 0 | 0.00000 |
| HETATM | 92  | Pt | 7.70898 | 12.06298 | 26.38310 | Pt | 1 | 0 | 0.00000 |
| HETATM | 93  | Pt | 0.46243 | 10.66513 | 26.38310 | Pt | 1 | 0 | 0.00000 |
| HETATM | 94  | Pt | 0.47106 | 2.29110  | 26.37641 | Pt | 1 | 0 | 0.00000 |
| HETATM | 95  | Pt | 0.46243 | 5.08192  | 26.38310 | Pt | 1 | 0 | 0.00000 |
| HETATM | 96  | Pt | 0.45917 | 7.87352  | 26.38396 | Pt | 1 | 0 | 0.00000 |
| HETATM | 97  | Pt | 1.26305 | 9.26590  | 28.66535 | Pt | 1 | 0 | 0.00000 |
| HETATM | 98  | Pt | 1.27189 | 0.88456  | 28.68535 | Pt | 1 | 0 | 0.00000 |
| HETATM | 99  | Pt | 1.27189 | 3.69765  | 28.68535 | Pt | 1 | 0 | 0.00000 |
| HETATM | 100 | Pt | 1.26305 | 6.48115  | 28.66535 | Pt | 1 | 0 | 0.00000 |
| HETATM | 101 | Pt | 3.66922 | 10.66531 | 28.68535 | Pt | 1 | 0 | 0.00000 |
| HETATM | 102 | Pt | 3.68218 | 2.29110  | 28.67188 | Pt | 1 | 0 | 0.00000 |
| HETATM | 103 | Pt | 3.66922 | 5.08175  | 28.68535 | Pt | 1 | 0 | 0.00000 |
| HETATM | 104 | Pt | 3.65327 | 7.87353  | 28.65048 | Pt | 1 | 0 | 0.00000 |
| HETATM | 105 | Pt | 6.10543 | 12.07185 | 28.68535 | Pt | 1 | 0 | 0.00000 |
| HETATM | 106 | Pt | 6.10543 | 3.67521  | 28.68535 | Pt | 1 | 0 | 0.00000 |
| HETATM | 107 | Pt | 6.10356 | 6.48505  | 28.74653 | Pt | 1 | 0 | 0.00000 |
| HETATM | 108 | Pt | 6.10355 | 9.26201  | 28.74653 | Pt | 1 | 0 | 0.00000 |
| HETATM | 109 | Pt | 8.52043 | 13.45595 | 28.66535 | Pt | 1 | 0 | 0.00000 |
| HETATM | 110 | Pt | 8.53116 | 5.05728  | 28.65048 | Pt | 1 | 0 | 0.00000 |
| HETATM | 111 | Pt | 8.50847 | 7.87353  | 28.74653 | Pt | 1 | 0 | 0.00000 |
| HETATM | 112 | Pt | 8.53116 | 10.68978 | 28.65048 | Pt | 1 | 0 | 0.00000 |
| HETATM | 113 | O  | 6.90520 | 7.87353  | 29.86516 | O  | 1 | 0 | 0.00000 |

UNIT ENERGY kcal  
ENERGY -14466.434290  
END

XTLGRF 200  
DESCRP TS  
REMARK Pt111\_4x4x7\_30.0\_vac "top"-diffusion

|          |          |                                                               |          |          |          |          |             |
|----------|----------|---------------------------------------------------------------|----------|----------|----------|----------|-------------|
| FIXATOMS | 1        | 32                                                            |          |          |          |          |             |
| CRYSTX   | 11.16485 | 11.16485                                                      | 43.67409 | 90.00000 | 90.00000 | 60.00000 |             |
| FORMAT   | ATOM     | (a6,1x,i5,1x,a5,1x,a3,1x,a1,1x,a5,3f10.5,1x,a5,i3,i2,1x,f8.5) |          |          |          |          |             |
| HETATM   | 1        | Pt                                                            | 1.26550  | 9.27015  | 14.99394 | Pt       | 1 0 0.00000 |
| HETATM   | 2        | Pt                                                            | 1.26550  | 0.89651  | 14.99394 | Pt       | 1 0 0.00000 |
| HETATM   | 3        | Pt                                                            | 1.26550  | 3.68772  | 14.99394 | Pt       | 1 0 0.00000 |
| HETATM   | 4        | Pt                                                            | 1.26550  | 6.47894  | 14.99394 | Pt       | 1 0 0.00000 |
| HETATM   | 5        | Pt                                                            | 3.68276  | 10.66576 | 14.99394 | Pt       | 1 0 0.00000 |
| HETATM   | 6        | Pt                                                            | 3.68276  | 2.29212  | 14.99394 | Pt       | 1 0 0.00000 |
| HETATM   | 7        | Pt                                                            | 3.68276  | 5.08333  | 14.99394 | Pt       | 1 0 0.00000 |
| HETATM   | 8        | Pt                                                            | 3.68276  | 7.87454  | 14.99394 | Pt       | 1 0 0.00000 |
| HETATM   | 9        | Pt                                                            | 6.10002  | 12.06136 | 14.99394 | Pt       | 1 0 0.00000 |
| HETATM   | 10       | Pt                                                            | 6.10002  | 3.68772  | 14.99394 | Pt       | 1 0 0.00000 |
| HETATM   | 11       | Pt                                                            | 6.10002  | 6.47894  | 14.99394 | Pt       | 1 0 0.00000 |
| HETATM   | 12       | Pt                                                            | 6.10002  | 9.27015  | 14.99394 | Pt       | 1 0 0.00000 |
| HETATM   | 13       | Pt                                                            | 8.51728  | 13.45697 | 14.99394 | Pt       | 1 0 0.00000 |
| HETATM   | 14       | Pt                                                            | 8.51728  | 5.08333  | 14.99394 | Pt       | 1 0 0.00000 |
| HETATM   | 15       | Pt                                                            | 8.51728  | 7.87454  | 14.99394 | Pt       | 1 0 0.00000 |
| HETATM   | 16       | Pt                                                            | 8.51728  | 10.66575 | 14.99394 | Pt       | 1 0 0.00000 |
| HETATM   | 17       | Pt                                                            | 2.07125  | 10.66576 | 17.27296 | Pt       | 1 0 0.00000 |
| HETATM   | 18       | Pt                                                            | 2.07125  | 2.29212  | 17.27296 | Pt       | 1 0 0.00000 |
| HETATM   | 19       | Pt                                                            | 2.07125  | 5.08333  | 17.27296 | Pt       | 1 0 0.00000 |
| HETATM   | 20       | Pt                                                            | 2.07125  | 7.87454  | 17.27296 | Pt       | 1 0 0.00000 |
| HETATM   | 21       | Pt                                                            | 4.48851  | 12.06136 | 17.27296 | Pt       | 1 0 0.00000 |
| HETATM   | 22       | Pt                                                            | 4.48851  | 3.68772  | 17.27296 | Pt       | 1 0 0.00000 |
| HETATM   | 23       | Pt                                                            | 4.48851  | 6.47894  | 17.27296 | Pt       | 1 0 0.00000 |
| HETATM   | 24       | Pt                                                            | 4.48851  | 9.27015  | 17.27296 | Pt       | 1 0 0.00000 |
| HETATM   | 25       | Pt                                                            | 6.90577  | 13.45697 | 17.27296 | Pt       | 1 0 0.00000 |
| HETATM   | 26       | Pt                                                            | 6.90577  | 5.08333  | 17.27296 | Pt       | 1 0 0.00000 |
| HETATM   | 27       | Pt                                                            | 6.90577  | 7.87454  | 17.27296 | Pt       | 1 0 0.00000 |
| HETATM   | 28       | Pt                                                            | 6.90577  | 10.66575 | 17.27296 | Pt       | 1 0 0.00000 |
| HETATM   | 29       | Pt                                                            | 9.32304  | 14.85257 | 17.27296 | Pt       | 1 0 0.00000 |
| HETATM   | 30       | Pt                                                            | 9.32304  | 6.47894  | 17.27296 | Pt       | 1 0 0.00000 |
| HETATM   | 31       | Pt                                                            | 9.32304  | 9.27015  | 17.27296 | Pt       | 1 0 0.00000 |
| HETATM   | 32       | Pt                                                            | 9.32304  | 12.06136 | 17.27296 | Pt       | 1 0 0.00000 |
| HETATM   | 33       | Pt                                                            | 2.87708  | 12.06145 | 19.55050 | Pt       | 1 0 0.00000 |
| HETATM   | 34       | Pt                                                            | 2.87666  | 3.68786  | 19.55188 | Pt       | 1 0 0.00000 |
| HETATM   | 35       | Pt                                                            | 2.87686  | 6.47890  | 19.55177 | Pt       | 1 0 0.00000 |
| HETATM   | 36       | Pt                                                            | 2.87707  | 9.26994  | 19.55065 | Pt       | 1 0 0.00000 |
| HETATM   | 37       | Pt                                                            | 5.29457  | 13.45673 | 19.55188 | Pt       | 1 0 0.00000 |
| HETATM   | 38       | Pt                                                            | 5.29441  | 5.08355  | 19.55245 | Pt       | 1 0 0.00000 |
| HETATM   | 39       | Pt                                                            | 5.29458  | 7.87469  | 19.55248 | Pt       | 1 0 0.00000 |
| HETATM   | 40       | Pt                                                            | 5.29486  | 10.66552 | 19.55182 | Pt       | 1 0 0.00000 |
| HETATM   | 41       | Pt                                                            | 7.71161  | 14.85247 | 19.55177 | Pt       | 1 0 0.00000 |
| HETATM   | 42       | Pt                                                            | 7.71149  | 6.47927  | 19.55249 | Pt       | 1 0 0.00000 |
| HETATM   | 43       | Pt                                                            | 7.71162  | 9.27027  | 19.55293 | Pt       | 1 0 0.00000 |
| HETATM   | 44       | Pt                                                            | 7.71169  | 12.06093 | 19.55244 | Pt       | 1 0 0.00000 |
| HETATM   | 45       | Pt                                                            | 0.45956  | 10.66576 | 19.55065 | Pt       | 1 0 0.00000 |
| HETATM   | 46       | Pt                                                            | 0.45928  | 2.29251  | 19.55183 | Pt       | 1 0 0.00000 |
| HETATM   | 47       | Pt                                                            | 0.45935  | 5.08328  | 19.55245 | Pt       | 1 0 0.00000 |
| HETATM   | 48       | Pt                                                            | 0.45956  | 7.87419  | 19.55114 | Pt       | 1 0 0.00000 |
| HETATM   | 49       | Pt                                                            | 1.26533  | 9.26980  | 21.82801 | Pt       | 1 0 0.00000 |
| HETATM   | 50       | Pt                                                            | 1.26587  | 0.89705  | 21.82703 | Pt       | 1 0 0.00000 |
| HETATM   | 51       | Pt                                                            | 1.26445  | 3.68787  | 21.83170 | Pt       | 1 0 0.00000 |
| HETATM   | 52       | Pt                                                            | 1.26501  | 6.47870  | 21.83068 | Pt       | 1 0 0.00000 |
| HETATM   | 53       | Pt                                                            | 3.68305  | 10.66631 | 21.82702 | Pt       | 1 0 0.00000 |
| HETATM   | 54       | Pt                                                            | 3.68275  | 2.29206  | 21.82930 | Pt       | 1 0 0.00000 |
| HETATM   | 55       | Pt                                                            | 3.68237  | 5.08325  | 21.83066 | Pt       | 1 0 0.00000 |
| HETATM   | 56       | Pt                                                            | 3.68256  | 7.87449  | 21.82951 | Pt       | 1 0 0.00000 |
| HETATM   | 57       | Pt                                                            | 6.10069  | 12.06046 | 21.83170 | Pt       | 1 0 0.00000 |
| HETATM   | 58       | Pt                                                            | 6.10019  | 3.68730  | 21.83066 | Pt       | 1 0 0.00000 |
| HETATM   | 59       | Pt                                                            | 6.10035  | 6.47945  | 21.83165 | Pt       | 1 0 0.00000 |
| HETATM   | 60       | Pt                                                            | 6.10087  | 9.27047  | 21.83169 | Pt       | 1 0 0.00000 |

|        |     |    |         |          |          |    |   |   |         |
|--------|-----|----|---------|----------|----------|----|---|---|---------|
| HETATM | 61  | Pt | 8.51739 | 13.45631 | 21.83068 | Pt | 1 | 0 | 0.00000 |
| HETATM | 62  | Pt | 8.51736 | 5.08310  | 21.82951 | Pt | 1 | 0 | 0.00000 |
| HETATM | 63  | Pt | 8.51717 | 7.87541  | 21.83170 | Pt | 1 | 0 | 0.00000 |
| HETATM | 64  | Pt | 8.51722 | 10.66560 | 21.83365 | Pt | 1 | 0 | 0.00000 |
| HETATM | 65  | Pt | 2.07210 | 10.66720 | 24.10146 | Pt | 1 | 0 | 0.00000 |
| HETATM | 66  | Pt | 2.07168 | 2.29266  | 24.10752 | Pt | 1 | 0 | 0.00000 |
| HETATM | 67  | Pt | 2.07012 | 5.08251  | 24.10994 | Pt | 1 | 0 | 0.00000 |
| HETATM | 68  | Pt | 2.07076 | 7.87451  | 24.10725 | Pt | 1 | 0 | 0.00000 |
| HETATM | 69  | Pt | 4.48877 | 12.06198 | 24.10751 | Pt | 1 | 0 | 0.00000 |
| HETATM | 70  | Pt | 4.48774 | 3.68639  | 24.10824 | Pt | 1 | 0 | 0.00000 |
| HETATM | 71  | Pt | 4.48805 | 6.47845  | 24.10769 | Pt | 1 | 0 | 0.00000 |
| HETATM | 72  | Pt | 4.48681 | 9.27454  | 24.10209 | Pt | 1 | 0 | 0.00000 |
| HETATM | 73  | Pt | 6.90559 | 13.45558 | 24.10993 | Pt | 1 | 0 | 0.00000 |
| HETATM | 74  | Pt | 6.90561 | 5.08269  | 24.10769 | Pt | 1 | 0 | 0.00000 |
| HETATM | 75  | Pt | 6.90674 | 7.87621  | 24.10959 | Pt | 1 | 0 | 0.00000 |
| HETATM | 76  | Pt | 6.90625 | 10.66471 | 24.11473 | Pt | 1 | 0 | 0.00000 |
| HETATM | 77  | Pt | 9.32325 | 14.85205 | 24.10724 | Pt | 1 | 0 | 0.00000 |
| HETATM | 78  | Pt | 9.32769 | 6.47963  | 24.10209 | Pt | 1 | 0 | 0.00000 |
| HETATM | 79  | Pt | 9.32191 | 9.27009  | 24.11474 | Pt | 1 | 0 | 0.00000 |
| HETATM | 80  | Pt | 9.32287 | 12.06108 | 24.11206 | Pt | 1 | 0 | 0.00000 |
| HETATM | 81  | Pt | 2.87743 | 12.06212 | 26.38420 | Pt | 1 | 0 | 0.00000 |
| HETATM | 82  | Pt | 2.87561 | 3.68642  | 26.38898 | Pt | 1 | 0 | 0.00000 |
| HETATM | 83  | Pt | 2.87476 | 6.47744  | 26.38340 | Pt | 1 | 0 | 0.00000 |
| HETATM | 84  | Pt | 2.87197 | 9.27705  | 26.37708 | Pt | 1 | 0 | 0.00000 |
| HETATM | 85  | Pt | 5.29382 | 13.45507 | 26.38898 | Pt | 1 | 0 | 0.00000 |
| HETATM | 86  | Pt | 5.28811 | 5.07265  | 26.38396 | Pt | 1 | 0 | 0.00000 |
| HETATM | 87  | Pt | 5.28243 | 7.89678  | 26.36640 | Pt | 1 | 0 | 0.00000 |
| HETATM | 88  | Pt | 5.29231 | 10.67242 | 26.38869 | Pt | 1 | 0 | 0.00000 |
| HETATM | 89  | Pt | 7.71136 | 14.84984 | 26.38340 | Pt | 1 | 0 | 0.00000 |
| HETATM | 90  | Pt | 7.73672 | 6.47981  | 26.36640 | Pt | 1 | 0 | 0.00000 |
| HETATM | 91  | Pt | 7.71072 | 9.26874  | 26.39849 | Pt | 1 | 0 | 0.00000 |
| HETATM | 92  | Pt | 7.71105 | 12.06116 | 26.39318 | Pt | 1 | 0 | 0.00000 |
| HETATM | 93  | Pt | 0.46821 | 10.66481 | 26.37707 | Pt | 1 | 0 | 0.00000 |
| HETATM | 94  | Pt | 0.46653 | 2.29377  | 26.38869 | Pt | 1 | 0 | 0.00000 |
| HETATM | 95  | Pt | 0.45980 | 5.08282  | 26.39318 | Pt | 1 | 0 | 0.00000 |
| HETATM | 96  | Pt | 0.45949 | 7.87406  | 26.38880 | Pt | 1 | 0 | 0.00000 |
| HETATM | 97  | Pt | 1.26613 | 9.27124  | 28.66541 | Pt | 1 | 0 | 0.00000 |
| HETATM | 98  | Pt | 1.26949 | 0.89453  | 28.66954 | Pt | 1 | 0 | 0.00000 |
| HETATM | 99  | Pt | 1.26792 | 3.68916  | 28.67951 | Pt | 1 | 0 | 0.00000 |
| HETATM | 100 | Pt | 1.26452 | 6.48226  | 28.67400 | Pt | 1 | 0 | 0.00000 |
| HETATM | 101 | Pt | 3.67906 | 10.66824 | 28.66954 | Pt | 1 | 0 | 0.00000 |
| HETATM | 102 | Pt | 3.68140 | 2.28976  | 28.66644 | Pt | 1 | 0 | 0.00000 |
| HETATM | 103 | Pt | 3.67558 | 5.08298  | 28.66912 | Pt | 1 | 0 | 0.00000 |
| HETATM | 104 | Pt | 3.67266 | 7.88512  | 28.63431 | Pt | 1 | 0 | 0.00000 |
| HETATM | 105 | Pt | 6.10008 | 12.06417 | 28.67951 | Pt | 1 | 0 | 0.00000 |
| HETATM | 106 | Pt | 6.10331 | 3.68133  | 28.66912 | Pt | 1 | 0 | 0.00000 |
| HETATM | 107 | Pt | 6.12150 | 6.51613  | 28.70762 | Pt | 1 | 0 | 0.00000 |
| HETATM | 108 | Pt | 6.09928 | 9.28927  | 28.67115 | Pt | 1 | 0 | 0.00000 |
| HETATM | 109 | Pt | 8.52062 | 13.45778 | 28.67400 | Pt | 1 | 0 | 0.00000 |
| HETATM | 110 | Pt | 8.53150 | 5.07986  | 28.63431 | Pt | 1 | 0 | 0.00000 |
| HETATM | 111 | Pt | 8.53425 | 7.88345  | 28.67115 | Pt | 1 | 0 | 0.00000 |
| HETATM | 112 | Pt | 8.52108 | 10.67228 | 28.67454 | Pt | 1 | 0 | 0.00000 |
| HETATM | 113 | O  | 6.07456 | 6.43481  | 30.24819 | O  | 1 | 0 | 0.00000 |

UNIT ENERGY kcal  
ENERGY -14425.143357  
END

XTLGRF 200  
DESCRP FS  
REMARK Pt111\_4x4x7\_30.0\_vac "top"-diffusion  
FIXATOMS 1 32  
CRYSTX 11.16485 11.16485 43.67409 90.00000 90.00000 60.00000  
FORMAT ATOM (a6,1x,i5,1x,a5,1x,a3,1x,a1,1x,a5,3f10.5,1x,a5,i3,i2,1x,f8.5)

|        |    |    |         |          |          |    |   |   |         |
|--------|----|----|---------|----------|----------|----|---|---|---------|
| HETATM | 1  | Pt | 1.26610 | 9.27118  | 14.99394 | Pt | 1 | 0 | 0.00000 |
| HETATM | 2  | Pt | 1.26610 | 0.89754  | 14.99394 | Pt | 1 | 0 | 0.00000 |
| HETATM | 3  | Pt | 1.26610 | 3.68875  | 14.99394 | Pt | 1 | 0 | 0.00000 |
| HETATM | 4  | Pt | 1.26610 | 6.47997  | 14.99394 | Pt | 1 | 0 | 0.00000 |
| HETATM | 5  | Pt | 3.68336 | 10.66679 | 14.99394 | Pt | 1 | 0 | 0.00000 |
| HETATM | 6  | Pt | 3.68336 | 2.29315  | 14.99394 | Pt | 1 | 0 | 0.00000 |
| HETATM | 7  | Pt | 3.68336 | 5.08436  | 14.99394 | Pt | 1 | 0 | 0.00000 |
| HETATM | 8  | Pt | 3.68336 | 7.87557  | 14.99394 | Pt | 1 | 0 | 0.00000 |
| HETATM | 9  | Pt | 6.10062 | 12.06239 | 14.99394 | Pt | 1 | 0 | 0.00000 |
| HETATM | 10 | Pt | 6.10062 | 3.68875  | 14.99394 | Pt | 1 | 0 | 0.00000 |
| HETATM | 11 | Pt | 6.10062 | 6.47997  | 14.99394 | Pt | 1 | 0 | 0.00000 |
| HETATM | 12 | Pt | 6.10062 | 9.27118  | 14.99394 | Pt | 1 | 0 | 0.00000 |
| HETATM | 13 | Pt | 8.51788 | 13.45800 | 14.99394 | Pt | 1 | 0 | 0.00000 |
| HETATM | 14 | Pt | 8.51788 | 5.08436  | 14.99394 | Pt | 1 | 0 | 0.00000 |
| HETATM | 15 | Pt | 8.51788 | 7.87557  | 14.99394 | Pt | 1 | 0 | 0.00000 |
| HETATM | 16 | Pt | 8.51788 | 10.66678 | 14.99394 | Pt | 1 | 0 | 0.00000 |
| HETATM | 17 | Pt | 2.07185 | 10.66679 | 17.27296 | Pt | 1 | 0 | 0.00000 |
| HETATM | 18 | Pt | 2.07185 | 2.29315  | 17.27296 | Pt | 1 | 0 | 0.00000 |
| HETATM | 19 | Pt | 2.07185 | 5.08436  | 17.27296 | Pt | 1 | 0 | 0.00000 |
| HETATM | 20 | Pt | 2.07185 | 7.87557  | 17.27296 | Pt | 1 | 0 | 0.00000 |
| HETATM | 21 | Pt | 4.48911 | 12.06239 | 17.27296 | Pt | 1 | 0 | 0.00000 |
| HETATM | 22 | Pt | 4.48911 | 3.68875  | 17.27296 | Pt | 1 | 0 | 0.00000 |
| HETATM | 23 | Pt | 4.48911 | 6.47997  | 17.27296 | Pt | 1 | 0 | 0.00000 |
| HETATM | 24 | Pt | 4.48911 | 9.27118  | 17.27296 | Pt | 1 | 0 | 0.00000 |
| HETATM | 25 | Pt | 6.90637 | 13.45800 | 17.27296 | Pt | 1 | 0 | 0.00000 |
| HETATM | 26 | Pt | 6.90637 | 5.08436  | 17.27296 | Pt | 1 | 0 | 0.00000 |
| HETATM | 27 | Pt | 6.90637 | 7.87557  | 17.27296 | Pt | 1 | 0 | 0.00000 |
| HETATM | 28 | Pt | 6.90637 | 10.66678 | 17.27296 | Pt | 1 | 0 | 0.00000 |
| HETATM | 29 | Pt | 9.32364 | 14.85360 | 17.27296 | Pt | 1 | 0 | 0.00000 |
| HETATM | 30 | Pt | 9.32364 | 6.47997  | 17.27296 | Pt | 1 | 0 | 0.00000 |
| HETATM | 31 | Pt | 9.32364 | 9.27118  | 17.27296 | Pt | 1 | 0 | 0.00000 |
| HETATM | 32 | Pt | 9.32364 | 12.06239 | 17.27296 | Pt | 1 | 0 | 0.00000 |
| HETATM | 33 | Pt | 2.87767 | 12.06251 | 19.55007 | Pt | 1 | 0 | 0.00000 |
| HETATM | 34 | Pt | 2.87706 | 3.68883  | 19.55232 | Pt | 1 | 0 | 0.00000 |
| HETATM | 35 | Pt | 2.87706 | 6.47989  | 19.55232 | Pt | 1 | 0 | 0.00000 |
| HETATM | 36 | Pt | 2.87767 | 9.27106  | 19.55007 | Pt | 1 | 0 | 0.00000 |
| HETATM | 37 | Pt | 5.29520 | 13.45757 | 19.55232 | Pt | 1 | 0 | 0.00000 |
| HETATM | 38 | Pt | 5.29486 | 5.08436  | 19.55250 | Pt | 1 | 0 | 0.00000 |
| HETATM | 39 | Pt | 5.29520 | 7.87600  | 19.55232 | Pt | 1 | 0 | 0.00000 |
| HETATM | 40 | Pt | 5.29570 | 10.66678 | 19.55189 | Pt | 1 | 0 | 0.00000 |
| HETATM | 41 | Pt | 7.71233 | 14.85310 | 19.55232 | Pt | 1 | 0 | 0.00000 |
| HETATM | 42 | Pt | 7.71233 | 6.48047  | 19.55232 | Pt | 1 | 0 | 0.00000 |
| HETATM | 43 | Pt | 7.71241 | 9.27166  | 19.55370 | Pt | 1 | 0 | 0.00000 |
| HETATM | 44 | Pt | 7.71241 | 12.06190 | 19.55370 | Pt | 1 | 0 | 0.00000 |
| HETATM | 45 | Pt | 0.46021 | 10.66679 | 19.55007 | Pt | 1 | 0 | 0.00000 |
| HETATM | 46 | Pt | 0.45993 | 2.29387  | 19.55189 | Pt | 1 | 0 | 0.00000 |
| HETATM | 47 | Pt | 0.45979 | 5.08436  | 19.55370 | Pt | 1 | 0 | 0.00000 |
| HETATM | 48 | Pt | 0.45993 | 7.87484  | 19.55189 | Pt | 1 | 0 | 0.00000 |
| HETATM | 49 | Pt | 1.26579 | 9.27065  | 21.82661 | Pt | 1 | 0 | 0.00000 |
| HETATM | 50 | Pt | 1.26579 | 0.89807  | 21.82661 | Pt | 1 | 0 | 0.00000 |
| HETATM | 51 | Pt | 1.26486 | 3.68927  | 21.83325 | Pt | 1 | 0 | 0.00000 |
| HETATM | 52 | Pt | 1.26486 | 6.47945  | 21.83325 | Pt | 1 | 0 | 0.00000 |
| HETATM | 53 | Pt | 3.68397 | 10.66678 | 21.82661 | Pt | 1 | 0 | 0.00000 |
| HETATM | 54 | Pt | 3.68287 | 2.29230  | 21.82900 | Pt | 1 | 0 | 0.00000 |
| HETATM | 55 | Pt | 3.68211 | 5.08436  | 21.83068 | Pt | 1 | 0 | 0.00000 |
| HETATM | 56 | Pt | 3.68287 | 7.87642  | 21.82900 | Pt | 1 | 0 | 0.00000 |
| HETATM | 57 | Pt | 6.10169 | 12.06157 | 21.83325 | Pt | 1 | 0 | 0.00000 |
| HETATM | 58 | Pt | 6.10124 | 3.68767  | 21.83068 | Pt | 1 | 0 | 0.00000 |
| HETATM | 59 | Pt | 6.10124 | 6.48105  | 21.83068 | Pt | 1 | 0 | 0.00000 |
| HETATM | 60 | Pt | 6.10169 | 9.27199  | 21.83325 | Pt | 1 | 0 | 0.00000 |
| HETATM | 61 | Pt | 8.51805 | 13.45666 | 21.83325 | Pt | 1 | 0 | 0.00000 |
| HETATM | 62 | Pt | 8.51885 | 5.08436  | 21.82900 | Pt | 1 | 0 | 0.00000 |
| HETATM | 63 | Pt | 8.51805 | 7.87691  | 21.83325 | Pt | 1 | 0 | 0.00000 |

|                      |     |    |         |          |          |    |   |   |         |
|----------------------|-----|----|---------|----------|----------|----|---|---|---------|
| HETATM               | 64  | Pt | 8.51788 | 10.66678 | 21.83693 | Pt | 1 | 0 | 0.00000 |
| HETATM               | 65  | Pt | 2.07185 | 10.66678 | 24.09777 | Pt | 1 | 0 | 0.00000 |
| HETATM               | 66  | Pt | 2.07019 | 2.29288  | 24.10706 | Pt | 1 | 0 | 0.00000 |
| HETATM               | 67  | Pt | 2.07011 | 5.08436  | 24.11387 | Pt | 1 | 0 | 0.00000 |
| HETATM               | 68  | Pt | 2.07019 | 7.87584  | 24.10706 | Pt | 1 | 0 | 0.00000 |
| HETATM               | 69  | Pt | 4.48971 | 12.06082 | 24.10706 | Pt | 1 | 0 | 0.00000 |
| HETATM               | 70  | Pt | 4.48847 | 3.68764  | 24.10566 | Pt | 1 | 0 | 0.00000 |
| HETATM               | 71  | Pt | 4.48847 | 6.48108  | 24.10566 | Pt | 1 | 0 | 0.00000 |
| HETATM               | 72  | Pt | 4.48971 | 9.27275  | 24.10706 | Pt | 1 | 0 | 0.00000 |
| HETATM               | 73  | Pt | 6.90724 | 13.45649 | 24.11387 | Pt | 1 | 0 | 0.00000 |
| HETATM               | 74  | Pt | 6.90766 | 5.08436  | 24.10566 | Pt | 1 | 0 | 0.00000 |
| HETATM               | 75  | Pt | 6.90724 | 7.87708  | 24.11387 | Pt | 1 | 0 | 0.00000 |
| HETATM               | 76  | Pt | 6.90760 | 10.66678 | 24.11939 | Pt | 1 | 0 | 0.00000 |
| HETATM               | 77  | Pt | 9.32469 | 14.85230 | 24.10706 | Pt | 1 | 0 | 0.00000 |
| HETATM               | 78  | Pt | 9.32469 | 6.48127  | 24.10706 | Pt | 1 | 0 | 0.00000 |
| HETATM               | 79  | Pt | 9.32302 | 9.27224  | 24.11939 | Pt | 1 | 0 | 0.00000 |
| HETATM               | 80  | Pt | 9.32302 | 12.06132 | 24.11939 | Pt | 1 | 0 | 0.00000 |
| HETATM               | 81  | Pt | 2.87473 | 12.05740 | 26.37463 | Pt | 1 | 0 | 0.00000 |
| HETATM               | 82  | Pt | 2.88020 | 3.68373  | 26.38642 | Pt | 1 | 0 | 0.00000 |
| HETATM               | 83  | Pt | 2.88020 | 6.48499  | 26.38642 | Pt | 1 | 0 | 0.00000 |
| HETATM               | 84  | Pt | 2.87473 | 9.27616  | 26.37463 | Pt | 1 | 0 | 0.00000 |
| HETATM               | 85  | Pt | 5.28922 | 13.45773 | 26.38642 | Pt | 1 | 0 | 0.00000 |
| HETATM               | 86  | Pt | 5.29487 | 5.08436  | 26.38057 | Pt | 1 | 0 | 0.00000 |
| HETATM               | 87  | Pt | 5.28922 | 7.87584  | 26.38642 | Pt | 1 | 0 | 0.00000 |
| HETATM               | 88  | Pt | 5.29505 | 10.66678 | 26.39395 | Pt | 1 | 0 | 0.00000 |
| HETATM               | 89  | Pt | 7.71518 | 14.85836 | 26.38642 | Pt | 1 | 0 | 0.00000 |
| HETATM               | 90  | Pt | 7.71518 | 6.47520  | 26.38642 | Pt | 1 | 0 | 0.00000 |
| HETATM               | 91  | Pt | 7.71093 | 9.26910  | 26.40653 | Pt | 1 | 0 | 0.00000 |
| HETATM               | 92  | Pt | 7.71093 | 12.06447 | 26.40653 | Pt | 1 | 0 | 0.00000 |
| HETATM               | 93  | Pt | 0.46611 | 10.66679 | 26.37463 | Pt | 1 | 0 | 0.00000 |
| HETATM               | 94  | Pt | 0.46026 | 2.29331  | 26.39395 | Pt | 1 | 0 | 0.00000 |
| HETATM               | 95  | Pt | 0.46275 | 5.08436  | 26.40653 | Pt | 1 | 0 | 0.00000 |
| HETATM               | 96  | Pt | 0.46026 | 7.87541  | 26.39395 | Pt | 1 | 0 | 0.00000 |
| HETATM               | 97  | Pt | 1.26930 | 9.27672  | 28.66373 | Pt | 1 | 0 | 0.00000 |
| HETATM               | 98  | Pt | 1.26930 | 0.89200  | 28.66373 | Pt | 1 | 0 | 0.00000 |
| HETATM               | 99  | Pt | 1.25674 | 3.67416  | 28.69497 | Pt | 1 | 0 | 0.00000 |
| HETATM               | 100 | Pt | 1.25674 | 6.49455  | 28.69497 | Pt | 1 | 0 | 0.00000 |
| HETATM               | 101 | Pt | 3.67696 | 10.66678 | 28.66373 | Pt | 1 | 0 | 0.00000 |
| HETATM               | 102 | Pt | 3.66995 | 2.26992  | 28.64375 | Pt | 1 | 0 | 0.00000 |
| HETATM               | 103 | Pt | 3.66736 | 5.08436  | 28.73828 | Pt | 1 | 0 | 0.00000 |
| HETATM               | 104 | Pt | 3.66995 | 7.89880  | 28.64375 | Pt | 1 | 0 | 0.00000 |
| HETATM               | 105 | Pt | 6.09266 | 12.04700 | 28.69497 | Pt | 1 | 0 | 0.00000 |
| HETATM               | 106 | Pt | 6.10862 | 3.67490  | 28.73828 | Pt | 1 | 0 | 0.00000 |
| HETATM               | 107 | Pt | 6.10862 | 6.49382  | 28.73828 | Pt | 1 | 0 | 0.00000 |
| HETATM               | 108 | Pt | 6.09266 | 9.28657  | 28.69497 | Pt | 1 | 0 | 0.00000 |
| HETATM               | 109 | Pt | 8.53519 | 13.45719 | 28.69497 | Pt | 1 | 0 | 0.00000 |
| HETATM               | 110 | Pt | 8.54470 | 5.08436  | 28.64375 | Pt | 1 | 0 | 0.00000 |
| HETATM               | 111 | Pt | 8.53519 | 7.87638  | 28.69497 | Pt | 1 | 0 | 0.00000 |
| HETATM               | 112 | Pt | 8.51788 | 10.66678 | 28.68932 | Pt | 1 | 0 | 0.00000 |
| HETATM               | 113 | O  | 5.29487 | 5.08436  | 29.84788 | O  | 1 | 0 | 0.00000 |
| UNIT ENERGY kcal     |     |    |         |          |          |    |   |   |         |
| ENERGY -14462.712538 |     |    |         |          |          |    |   |   |         |
| END                  |     |    |         |          |          |    |   |   |         |
