# Supplementary material for: Development of a ReaxFF potential for Pt–O systems describing the energetics and dynamics of Pt-oxide formation
Source: Royal Society of Chemistry journal article supplement (doi:10.1039/c4cp03111c), 2014-01-01
Supplement: c4cp03111c1.zip [file c4cp03111c1.zip]

```

XTLGRF 200
DESCRP A0162
REMARK 1x1-clean-{111}-step
FIXATOMS      15      25
CRYSTX      2.79100      8.37290      55.65550      90.00000      90.00000      90.00000
FORMAT ATOM      (a6,1x,i5,1x,a5,1x,a3,1x,a1,1x,a5,3f10.5,1x,a5,i3,i2,1x,f8.5)
HETATM      1 Pt      2.09325      1.72050      14.99747      Pt      0 0      0.00000
HETATM      2 Pt      0.69775      4.06539      15.64967      Pt      0 0      0.00000
HETATM      3 Pt      2.09325      6.40695      16.30307      Pt      0 0      0.00000
HETATM      4 Pt      0.69775      0.35161      16.98669      Pt      0 0      0.00000
HETATM      5 Pt      2.09325      2.67768      17.63112      Pt      0 0      0.00000
HETATM      6 Pt      0.69775      5.00545      18.28247      Pt      0 0      0.00000
HETATM      7 Pt      2.09325      7.32583      18.95030      Pt      0 0      0.00000
HETATM      8 Pt      0.69775      1.28171      19.60854      Pt      0 0      0.00000
HETATM      9 Pt      2.09325      3.60833      20.26045      Pt      0 0      0.00000
HETATM     10 Pt      0.69775      5.93102      20.92093      Pt      0 0      0.00000
HETATM     11 Pt      2.09325      8.25656      21.58025      Pt      0 0      0.00000
HETATM     12 Pt      0.69775      2.21094      22.23633      Pt      0 0      0.00000
HETATM     13 Pt      2.09325      4.53546      22.89434      Pt      0 0      0.00000
HETATM     14 Pt      0.69775      6.86093      23.55274      Pt      0 0      0.00000
HETATM     15 Pt      2.09325      0.81426      24.21017      Pt      0 0      0.00000
HETATM     16 Pt      0.69775      3.13987      24.86804      Pt      0 0      0.00000
HETATM     17 Pt      2.09325      5.46555      25.52588      Pt      0 0      0.00000
HETATM     18 Pt      0.69775      7.79133      26.18378      Pt      0 0      0.00000
HETATM     19 Pt      2.09325      1.74428      26.84148      Pt      0 0      0.00000
HETATM     20 Pt      0.69775      4.07015      27.49902      Pt      0 0      0.00000
HETATM     21 Pt      2.09325      6.39597      28.15648      Pt      0 0      0.00000
HETATM     22 Pt      0.69775      0.34894      28.81402      Pt      0 0      0.00000
HETATM     23 Pt      2.09325      2.67479      29.47172      Pt      0 0      0.00000
HETATM     24 Pt      0.69775      5.00057      30.12962      Pt      0 0      0.00000
HETATM     25 Pt      2.09325      7.32625      30.78746      Pt      0 0      0.00000
HETATM     26 Pt      0.69775      1.27904      31.44538      Pt      0 0      0.00000
HETATM     27 Pt      2.09325      3.60520      32.10276      Pt      0 0      0.00000
HETATM     28 Pt      0.69775      5.93067      32.76116      Pt      0 0      0.00000
HETATM     29 Pt      2.09325      8.25519      33.41918      Pt      0 0      0.00000
HETATM     30 Pt      0.69775      2.20956      34.07525      Pt      0 0      0.00000
HETATM     31 Pt      2.09325      4.53511      34.73456      Pt      0 0      0.00000
HETATM     32 Pt      0.69775      6.85779      35.39506      Pt      0 0      0.00000
HETATM     33 Pt      2.09325      0.81152      36.04696      Pt      0 0      0.00000
HETATM     34 Pt      0.69775      3.14030      36.70520      Pt      0 0      0.00000
HETATM     35 Pt      2.09325      5.46068      37.37303      Pt      0 0      0.00000
HETATM     36 Pt      0.69775      7.78845      38.02438      Pt      0 0      0.00000
HETATM     37 Pt      2.09325      1.74162      38.66881      Pt      0 0      0.00000
HETATM     38 Pt      0.69775      4.05918      39.35243      Pt      0 0      0.00000
HETATM     39 Pt      2.09325      6.40074      40.00583      Pt      0 0      0.00000
HETATM     40 Pt      0.69775      0.37273      40.65803      Pt      0 0      0.00000
UNIT ENERGY      kcal
ENERGY      -5193.615102
END

```

```

XTLGRF 200
DESCRP A0208
REMARK 2x1-clean-{111}-step
FIXATOMS      29      50
CRYSTX      5.58200      8.37290      55.65550      90.00000      90.00000      90.00000
FORMAT ATOM      (a6,1x,i5,1x,a5,1x,a3,1x,a1,1x,a5,3f10.5,1x,a5,i3,i2,1x,f8.5)
HETATM      1 Pt      2.09325      1.72050      14.99747      Pt      0 0      0.00000
HETATM      2 Pt      4.88425      1.72050      14.99747      Pt      0 0      0.00000
HETATM      3 Pt      0.69775      4.06539      15.64967      Pt      0 0      0.00000
HETATM      4 Pt      3.48875      4.06539      15.64967      Pt      0 0      0.00000
HETATM      5 Pt      2.09325      6.40695      16.30307      Pt      0 0      0.00000
HETATM      6 Pt      4.88425      6.40695      16.30307      Pt      0 0      0.00000
HETATM      7 Pt      0.69775      0.35161      16.98669      Pt      0 0      0.00000

```

|        |    |    |         |         |          |    |   |   |         |
|--------|----|----|---------|---------|----------|----|---|---|---------|
| HETATM | 8  | Pt | 3.48875 | 0.35161 | 16.98669 | Pt | 0 | 0 | 0.00000 |
| HETATM | 9  | Pt | 2.09325 | 2.67768 | 17.63112 | Pt | 0 | 0 | 0.00000 |
| HETATM | 10 | Pt | 4.88425 | 2.67768 | 17.63112 | Pt | 0 | 0 | 0.00000 |
| HETATM | 11 | Pt | 0.69775 | 5.00545 | 18.28247 | Pt | 0 | 0 | 0.00000 |
| HETATM | 12 | Pt | 3.48875 | 5.00545 | 18.28247 | Pt | 0 | 0 | 0.00000 |
| HETATM | 13 | Pt | 2.09325 | 7.32583 | 18.95030 | Pt | 0 | 0 | 0.00000 |
| HETATM | 14 | Pt | 4.88425 | 7.32583 | 18.95030 | Pt | 0 | 0 | 0.00000 |
| HETATM | 15 | Pt | 0.69775 | 1.28171 | 19.60854 | Pt | 0 | 0 | 0.00000 |
| HETATM | 16 | Pt | 3.48875 | 1.28171 | 19.60854 | Pt | 0 | 0 | 0.00000 |
| HETATM | 17 | Pt | 2.09325 | 3.60833 | 20.26045 | Pt | 0 | 0 | 0.00000 |
| HETATM | 18 | Pt | 4.88425 | 3.60833 | 20.26045 | Pt | 0 | 0 | 0.00000 |
| HETATM | 19 | Pt | 0.69775 | 5.93102 | 20.92093 | Pt | 0 | 0 | 0.00000 |
| HETATM | 20 | Pt | 3.48875 | 5.93102 | 20.92093 | Pt | 0 | 0 | 0.00000 |
| HETATM | 21 | Pt | 2.09325 | 8.25656 | 21.58025 | Pt | 0 | 0 | 0.00000 |
| HETATM | 22 | Pt | 4.88425 | 8.25656 | 21.58025 | Pt | 0 | 0 | 0.00000 |
| HETATM | 23 | Pt | 0.69775 | 2.21094 | 22.23633 | Pt | 0 | 0 | 0.00000 |
| HETATM | 24 | Pt | 3.48875 | 2.21094 | 22.23633 | Pt | 0 | 0 | 0.00000 |
| HETATM | 25 | Pt | 2.09325 | 4.53546 | 22.89434 | Pt | 0 | 0 | 0.00000 |
| HETATM | 26 | Pt | 4.88425 | 4.53546 | 22.89434 | Pt | 0 | 0 | 0.00000 |
| HETATM | 27 | Pt | 0.69775 | 6.86093 | 23.55274 | Pt | 0 | 0 | 0.00000 |
| HETATM | 28 | Pt | 3.48875 | 6.86093 | 23.55274 | Pt | 0 | 0 | 0.00000 |
| HETATM | 29 | Pt | 2.09325 | 0.81426 | 24.21017 | Pt | 0 | 0 | 0.00000 |
| HETATM | 30 | Pt | 4.88425 | 0.81426 | 24.21017 | Pt | 0 | 0 | 0.00000 |
| HETATM | 31 | Pt | 0.69775 | 3.13987 | 24.86804 | Pt | 0 | 0 | 0.00000 |
| HETATM | 32 | Pt | 3.48875 | 3.13987 | 24.86804 | Pt | 0 | 0 | 0.00000 |
| HETATM | 33 | Pt | 2.09325 | 5.46555 | 25.52588 | Pt | 0 | 0 | 0.00000 |
| HETATM | 34 | Pt | 4.88425 | 5.46555 | 25.52588 | Pt | 0 | 0 | 0.00000 |
| HETATM | 35 | Pt | 0.69775 | 7.79133 | 26.18378 | Pt | 0 | 0 | 0.00000 |
| HETATM | 36 | Pt | 3.48875 | 7.79133 | 26.18378 | Pt | 0 | 0 | 0.00000 |
| HETATM | 37 | Pt | 2.09325 | 1.74428 | 26.84148 | Pt | 0 | 0 | 0.00000 |
| HETATM | 38 | Pt | 4.88425 | 1.74428 | 26.84148 | Pt | 0 | 0 | 0.00000 |
| HETATM | 39 | Pt | 0.69775 | 4.07015 | 27.49902 | Pt | 0 | 0 | 0.00000 |
| HETATM | 40 | Pt | 3.48875 | 4.07015 | 27.49902 | Pt | 0 | 0 | 0.00000 |
| HETATM | 41 | Pt | 2.09325 | 6.39597 | 28.15648 | Pt | 0 | 0 | 0.00000 |
| HETATM | 42 | Pt | 4.88425 | 6.39597 | 28.15648 | Pt | 0 | 0 | 0.00000 |
| HETATM | 43 | Pt | 0.69775 | 0.34894 | 28.81402 | Pt | 0 | 0 | 0.00000 |
| HETATM | 44 | Pt | 3.48875 | 0.34894 | 28.81402 | Pt | 0 | 0 | 0.00000 |
| HETATM | 45 | Pt | 2.09325 | 2.67479 | 29.47172 | Pt | 0 | 0 | 0.00000 |
| HETATM | 46 | Pt | 4.88425 | 2.67479 | 29.47172 | Pt | 0 | 0 | 0.00000 |
| HETATM | 47 | Pt | 0.69775 | 5.00057 | 30.12962 | Pt | 0 | 0 | 0.00000 |
| HETATM | 48 | Pt | 3.48875 | 5.00057 | 30.12962 | Pt | 0 | 0 | 0.00000 |
| HETATM | 49 | Pt | 2.09325 | 7.32625 | 30.78746 | Pt | 0 | 0 | 0.00000 |
| HETATM | 50 | Pt | 4.88425 | 7.32625 | 30.78746 | Pt | 0 | 0 | 0.00000 |
| HETATM | 51 | Pt | 0.69775 | 1.27904 | 31.44539 | Pt | 0 | 0 | 0.00000 |
| HETATM | 52 | Pt | 3.48875 | 1.27904 | 31.44539 | Pt | 0 | 0 | 0.00000 |
| HETATM | 53 | Pt | 2.09325 | 3.60520 | 32.10276 | Pt | 0 | 0 | 0.00000 |
| HETATM | 54 | Pt | 4.88425 | 3.60520 | 32.10276 | Pt | 0 | 0 | 0.00000 |
| HETATM | 55 | Pt | 0.69775 | 5.93067 | 32.76116 | Pt | 0 | 0 | 0.00000 |
| HETATM | 56 | Pt | 3.48875 | 5.93067 | 32.76116 | Pt | 0 | 0 | 0.00000 |
| HETATM | 57 | Pt | 2.09325 | 8.25519 | 33.41917 | Pt | 0 | 0 | 0.00000 |
| HETATM | 58 | Pt | 4.88425 | 8.25519 | 33.41917 | Pt | 0 | 0 | 0.00000 |
| HETATM | 59 | Pt | 0.69775 | 2.20956 | 34.07525 | Pt | 0 | 0 | 0.00000 |
| HETATM | 60 | Pt | 3.48875 | 2.20956 | 34.07525 | Pt | 0 | 0 | 0.00000 |
| HETATM | 61 | Pt | 2.09325 | 4.53511 | 34.73456 | Pt | 0 | 0 | 0.00000 |
| HETATM | 62 | Pt | 4.88425 | 4.53511 | 34.73456 | Pt | 0 | 0 | 0.00000 |
| HETATM | 63 | Pt | 0.69775 | 6.85779 | 35.39506 | Pt | 0 | 0 | 0.00000 |
| HETATM | 64 | Pt | 3.48875 | 6.85779 | 35.39506 | Pt | 0 | 0 | 0.00000 |
| HETATM | 65 | Pt | 2.09325 | 0.81152 | 36.04696 | Pt | 0 | 0 | 0.00000 |
| HETATM | 66 | Pt | 4.88425 | 0.81152 | 36.04696 | Pt | 0 | 0 | 0.00000 |
| HETATM | 67 | Pt | 0.69775 | 3.14030 | 36.70520 | Pt | 0 | 0 | 0.00000 |
| HETATM | 68 | Pt | 3.48875 | 3.14030 | 36.70520 | Pt | 0 | 0 | 0.00000 |
| HETATM | 69 | Pt | 2.09325 | 5.46068 | 37.37303 | Pt | 0 | 0 | 0.00000 |
| HETATM | 70 | Pt | 4.88425 | 5.46068 | 37.37303 | Pt | 0 | 0 | 0.00000 |

|                      |    |    |         |         |          |    |   |   |         |
|----------------------|----|----|---------|---------|----------|----|---|---|---------|
| HETATM               | 71 | Pt | 0.69775 | 7.78845 | 38.02438 | Pt | 0 | 0 | 0.00000 |
| HETATM               | 72 | Pt | 3.48875 | 7.78845 | 38.02438 | Pt | 0 | 0 | 0.00000 |
| HETATM               | 73 | Pt | 2.09325 | 1.74162 | 38.66881 | Pt | 0 | 0 | 0.00000 |
| HETATM               | 74 | Pt | 4.88425 | 1.74162 | 38.66881 | Pt | 0 | 0 | 0.00000 |
| HETATM               | 75 | Pt | 0.69775 | 4.05918 | 39.35243 | Pt | 0 | 0 | 0.00000 |
| HETATM               | 76 | Pt | 3.48875 | 4.05918 | 39.35243 | Pt | 0 | 0 | 0.00000 |
| HETATM               | 77 | Pt | 2.09325 | 6.40074 | 40.00583 | Pt | 0 | 0 | 0.00000 |
| HETATM               | 78 | Pt | 4.88425 | 6.40074 | 40.00583 | Pt | 0 | 0 | 0.00000 |
| HETATM               | 79 | Pt | 0.69775 | 0.37273 | 40.65803 | Pt | 0 | 0 | 0.00000 |
| HETATM               | 80 | Pt | 3.48875 | 0.37273 | 40.65803 | Pt | 0 | 0 | 0.00000 |
| UNIT ENERGY kcal     |    |    |         |         |          |    |   |   |         |
| ENERGY -10387.230187 |    |    |         |         |          |    |   |   |         |
| END                  |    |    |         |         |          |    |   |   |         |

XTLGRF 200  
DESCRP A0218  
REMARK 2x1-fcc-{111}-step  
FIXATOMS 29 50  
CRYSTX 5.58200 8.37290 55.65550 90.00000 90.00000 90.00000  
FORMAT ATOM (a6,1x,i5,1x,a5,1x,a3,1x,a1,1x,a5,3f10.5,1x,a5,i3,i2,1x,f8.5)

|        |    |    |         |         |          |    |   |   |         |
|--------|----|----|---------|---------|----------|----|---|---|---------|
| HETATM | 1  | Pt | 2.10611 | 1.69341 | 14.89542 | Pt | 0 | 0 | 0.00000 |
| HETATM | 2  | Pt | 4.86854 | 1.69341 | 14.89542 | Pt | 0 | 0 | 0.00000 |
| HETATM | 3  | Pt | 0.69633 | 4.05517 | 15.68307 | Pt | 0 | 0 | 0.00000 |
| HETATM | 4  | Pt | 3.48733 | 4.02975 | 15.57085 | Pt | 0 | 0 | 0.00000 |
| HETATM | 5  | Pt | 2.08580 | 6.40671 | 16.29345 | Pt | 0 | 0 | 0.00000 |
| HETATM | 6  | Pt | 4.88885 | 6.40671 | 16.29345 | Pt | 0 | 0 | 0.00000 |
| HETATM | 7  | Pt | 0.69633 | 0.32751 | 17.03642 | Pt | 0 | 0 | 0.00000 |
| HETATM | 8  | Pt | 3.48733 | 0.34609 | 16.95511 | Pt | 0 | 0 | 0.00000 |
| HETATM | 9  | Pt | 2.09538 | 2.66322 | 17.60699 | Pt | 0 | 0 | 0.00000 |
| HETATM | 10 | Pt | 4.87927 | 2.66322 | 17.60699 | Pt | 0 | 0 | 0.00000 |
| HETATM | 11 | Pt | 0.69633 | 4.99882 | 18.28696 | Pt | 0 | 0 | 0.00000 |
| HETATM | 12 | Pt | 3.48733 | 4.99692 | 18.29355 | Pt | 0 | 0 | 0.00000 |
| HETATM | 13 | Pt | 2.09734 | 7.31516 | 18.95455 | Pt | 0 | 0 | 0.00000 |
| HETATM | 14 | Pt | 4.87731 | 7.31516 | 18.95455 | Pt | 0 | 0 | 0.00000 |
| HETATM | 15 | Pt | 0.69633 | 1.27991 | 19.61375 | Pt | 0 | 0 | 0.00000 |
| HETATM | 16 | Pt | 3.48733 | 1.27407 | 19.59424 | Pt | 0 | 0 | 0.00000 |
| HETATM | 17 | Pt | 2.09194 | 3.59896 | 20.25651 | Pt | 0 | 0 | 0.00000 |
| HETATM | 18 | Pt | 4.88272 | 3.59896 | 20.25651 | Pt | 0 | 0 | 0.00000 |
| HETATM | 19 | Pt | 0.69633 | 5.92359 | 20.92260 | Pt | 0 | 0 | 0.00000 |
| HETATM | 20 | Pt | 3.48733 | 5.92238 | 20.92637 | Pt | 0 | 0 | 0.00000 |
| HETATM | 21 | Pt | 2.09266 | 8.25238 | 21.57918 | Pt | 0 | 0 | 0.00000 |
| HETATM | 22 | Pt | 4.88200 | 8.25238 | 21.57918 | Pt | 0 | 0 | 0.00000 |
| HETATM | 23 | Pt | 0.69633 | 2.20690 | 22.23763 | Pt | 0 | 0 | 0.00000 |
| HETATM | 24 | Pt | 3.48733 | 2.20543 | 22.23238 | Pt | 0 | 0 | 0.00000 |
| HETATM | 25 | Pt | 2.09178 | 4.53003 | 22.89466 | Pt | 0 | 0 | 0.00000 |
| HETATM | 26 | Pt | 4.88288 | 4.53003 | 22.89466 | Pt | 0 | 0 | 0.00000 |
| HETATM | 27 | Pt | 0.69633 | 6.85743 | 23.55246 | Pt | 0 | 0 | 0.00000 |
| HETATM | 28 | Pt | 3.48733 | 6.85748 | 23.55360 | Pt | 0 | 0 | 0.00000 |
| HETATM | 29 | Pt | 2.09183 | 0.81168 | 24.21050 | Pt | 0 | 0 | 0.00000 |
| HETATM | 30 | Pt | 4.88283 | 0.81168 | 24.21050 | Pt | 0 | 0 | 0.00000 |
| HETATM | 31 | Pt | 0.69633 | 3.13729 | 24.86837 | Pt | 0 | 0 | 0.00000 |
| HETATM | 32 | Pt | 3.48733 | 3.13729 | 24.86837 | Pt | 0 | 0 | 0.00000 |
| HETATM | 33 | Pt | 2.09183 | 5.46297 | 25.52621 | Pt | 0 | 0 | 0.00000 |
| HETATM | 34 | Pt | 4.88283 | 5.46297 | 25.52621 | Pt | 0 | 0 | 0.00000 |
| HETATM | 35 | Pt | 0.69633 | 7.78875 | 26.18411 | Pt | 0 | 0 | 0.00000 |
| HETATM | 36 | Pt | 3.48733 | 7.78875 | 26.18411 | Pt | 0 | 0 | 0.00000 |
| HETATM | 37 | Pt | 2.09183 | 1.74170 | 26.84181 | Pt | 0 | 0 | 0.00000 |
| HETATM | 38 | Pt | 4.88283 | 1.74170 | 26.84181 | Pt | 0 | 0 | 0.00000 |
| HETATM | 39 | Pt | 0.69633 | 4.06757 | 27.49935 | Pt | 0 | 0 | 0.00000 |
| HETATM | 40 | Pt | 3.48733 | 4.06757 | 27.49935 | Pt | 0 | 0 | 0.00000 |
| HETATM | 41 | Pt | 2.09183 | 6.39339 | 28.15681 | Pt | 0 | 0 | 0.00000 |
| HETATM | 42 | Pt | 4.88283 | 6.39339 | 28.15681 | Pt | 0 | 0 | 0.00000 |
| HETATM | 43 | Pt | 0.69633 | 0.34636 | 28.81435 | Pt | 0 | 0 | 0.00000 |

|        |    |    |         |         |          |    |   |   |         |
|--------|----|----|---------|---------|----------|----|---|---|---------|
| HETATM | 44 | Pt | 3.48733 | 0.34636 | 28.81435 | Pt | 0 | 0 | 0.00000 |
| HETATM | 45 | Pt | 2.09183 | 2.67221 | 29.47205 | Pt | 0 | 0 | 0.00000 |
| HETATM | 46 | Pt | 4.88283 | 2.67221 | 29.47205 | Pt | 0 | 0 | 0.00000 |
| HETATM | 47 | Pt | 0.69633 | 4.99799 | 30.12995 | Pt | 0 | 0 | 0.00000 |
| HETATM | 48 | Pt | 3.48733 | 4.99799 | 30.12995 | Pt | 0 | 0 | 0.00000 |
| HETATM | 49 | Pt | 2.09183 | 7.32367 | 30.78779 | Pt | 0 | 0 | 0.00000 |
| HETATM | 50 | Pt | 4.88283 | 7.32367 | 30.78779 | Pt | 0 | 0 | 0.00000 |
| HETATM | 51 | Pt | 0.69671 | 1.27315 | 31.44683 | Pt | 0 | 0 | 0.00000 |
| HETATM | 52 | Pt | 3.48718 | 1.27316 | 31.44681 | Pt | 0 | 0 | 0.00000 |
| HETATM | 53 | Pt | 2.09199 | 3.59820 | 32.10257 | Pt | 0 | 0 | 0.00000 |
| HETATM | 54 | Pt | 4.88299 | 3.59810 | 32.10361 | Pt | 0 | 0 | 0.00000 |
| HETATM | 55 | Pt | 0.69641 | 5.92382 | 32.76126 | Pt | 0 | 0 | 0.00000 |
| HETATM | 56 | Pt | 3.48749 | 5.92381 | 32.76135 | Pt | 0 | 0 | 0.00000 |
| HETATM | 57 | Pt | 2.09192 | 8.24588 | 33.42475 | Pt | 0 | 0 | 0.00000 |
| HETATM | 58 | Pt | 4.88290 | 8.24451 | 33.41928 | Pt | 0 | 0 | 0.00000 |
| HETATM | 59 | Pt | 0.69720 | 2.19775 | 34.07719 | Pt | 0 | 0 | 0.00000 |
| HETATM | 60 | Pt | 3.48653 | 2.19779 | 34.07715 | Pt | 0 | 0 | 0.00000 |
| HETATM | 61 | Pt | 2.09181 | 4.52657 | 34.72975 | Pt | 0 | 0 | 0.00000 |
| HETATM | 62 | Pt | 4.88279 | 4.52523 | 34.73333 | Pt | 0 | 0 | 0.00000 |
| HETATM | 63 | Pt | 0.69635 | 6.84740 | 35.40065 | Pt | 0 | 0 | 0.00000 |
| HETATM | 64 | Pt | 3.48702 | 6.84739 | 35.40089 | Pt | 0 | 0 | 0.00000 |
| HETATM | 65 | Pt | 2.09174 | 0.79841 | 36.06208 | Pt | 0 | 0 | 0.00000 |
| HETATM | 66 | Pt | 4.88263 | 0.79263 | 36.04226 | Pt | 0 | 0 | 0.00000 |
| HETATM | 67 | Pt | 0.70179 | 3.13001 | 36.70108 | Pt | 0 | 0 | 0.00000 |
| HETATM | 68 | Pt | 3.48185 | 3.13017 | 36.70098 | Pt | 0 | 0 | 0.00000 |
| HETATM | 69 | Pt | 2.09172 | 5.44667 | 37.36453 | Pt | 0 | 0 | 0.00000 |
| HETATM | 70 | Pt | 4.88276 | 5.44447 | 37.37059 | Pt | 0 | 0 | 0.00000 |
| HETATM | 71 | Pt | 0.69984 | 7.77929 | 38.04984 | Pt | 0 | 0 | 0.00000 |
| HETATM | 72 | Pt | 3.48375 | 7.77921 | 38.05046 | Pt | 0 | 0 | 0.00000 |
| HETATM | 73 | Pt | 2.09245 | 1.72396 | 38.69933 | Pt | 0 | 0 | 0.00000 |
| HETATM | 74 | Pt | 4.88288 | 1.74273 | 38.61803 | Pt | 0 | 0 | 0.00000 |
| HETATM | 75 | Pt | 0.69039 | 4.03462 | 39.36405 | Pt | 0 | 0 | 0.00000 |
| HETATM | 76 | Pt | 3.49355 | 4.03499 | 39.36397 | Pt | 0 | 0 | 0.00000 |
| HETATM | 77 | Pt | 2.09147 | 6.41245 | 40.08919 | Pt | 0 | 0 | 0.00000 |
| HETATM | 78 | Pt | 4.88279 | 6.38664 | 39.97514 | Pt | 0 | 0 | 0.00000 |
| HETATM | 79 | Pt | 0.71161 | 0.37886 | 40.75811 | Pt | 0 | 0 | 0.00000 |
| HETATM | 80 | Pt | 3.47332 | 0.37710 | 40.76070 | Pt | 0 | 0 | 0.00000 |
| HETATM | 81 | O  | 2.09039 | 7.69174 | 41.59578 | O  | 0 | 0 | 0.00000 |
| HETATM | 82 | O  | 3.48733 | 2.75557 | 14.06093 | O  | 0 | 0 | 0.00000 |

UNIT ENERGY kcal  
ENERGY -10587.881656  
END

XTLGRF 200  
DESCRP A0159  
REMARK 1x1-fcc-{111}-step  
FIXATOMS 15 25  
CRYSTX 2.79100 8.37290 55.65550 90.00000 90.00000 90.00000  
FORMAT ATOM (a6,1x,i5,1x,a5,1x,a3,1x,a1,1x,a5,3f10.5,1x,a5,i3,i2,1x,f8.5)  

|        |    |    |         |         |          |    |   |   |         |
|--------|----|----|---------|---------|----------|----|---|---|---------|
| HETATM | 1  | Pt | 2.08468 | 1.70041 | 14.75267 | Pt | 0 | 0 | 0.00000 |
| HETATM | 2  | Pt | 0.68919 | 4.01750 | 15.63458 | Pt | 0 | 0 | 0.00000 |
| HETATM | 3  | Pt | 2.08469 | 6.40570 | 16.27432 | Pt | 0 | 0 | 0.00000 |
| HETATM | 4  | Pt | 0.68919 | 0.33937 | 16.98493 | Pt | 0 | 0 | 0.00000 |
| HETATM | 5  | Pt | 2.08469 | 2.65629 | 17.60345 | Pt | 0 | 0 | 0.00000 |
| HETATM | 6  | Pt | 0.68920 | 5.00455 | 18.30464 | Pt | 0 | 0 | 0.00000 |
| HETATM | 7  | Pt | 2.08470 | 7.32127 | 18.94703 | Pt | 0 | 0 | 0.00000 |
| HETATM | 8  | Pt | 0.68920 | 1.27765 | 19.60163 | Pt | 0 | 0 | 0.00000 |
| HETATM | 9  | Pt | 2.08470 | 3.59800 | 20.25856 | Pt | 0 | 0 | 0.00000 |
| HETATM | 10 | Pt | 0.68920 | 5.92693 | 20.92515 | Pt | 0 | 0 | 0.00000 |
| HETATM | 11 | Pt | 2.08470 | 8.25425 | 21.57744 | Pt | 0 | 0 | 0.00000 |
| HETATM | 12 | Pt | 0.68921 | 2.20622 | 22.23558 | Pt | 0 | 0 | 0.00000 |
| HETATM | 13 | Pt | 2.08471 | 4.53083 | 22.89460 | Pt | 0 | 0 | 0.00000 |
| HETATM | 14 | Pt | 0.68921 | 6.85828 | 23.55281 | Pt | 0 | 0 | 0.00000 |

|        |    |    |         |         |          |    |   |   |         |
|--------|----|----|---------|---------|----------|----|---|---|---------|
| HETATM | 15 | Pt | 2.08471 | 0.81144 | 24.21058 | Pt | 0 | 0 | 0.00000 |
| HETATM | 16 | Pt | 0.68921 | 3.13705 | 24.86845 | Pt | 0 | 0 | 0.00000 |
| HETATM | 17 | Pt | 2.08471 | 5.46273 | 25.52629 | Pt | 0 | 0 | 0.00000 |
| HETATM | 18 | Pt | 0.68921 | 7.78851 | 26.18419 | Pt | 0 | 0 | 0.00000 |
| HETATM | 19 | Pt | 2.08471 | 1.74146 | 26.84189 | Pt | 0 | 0 | 0.00000 |
| HETATM | 20 | Pt | 0.68921 | 4.06733 | 27.49943 | Pt | 0 | 0 | 0.00000 |
| HETATM | 21 | Pt | 2.08471 | 6.39315 | 28.15689 | Pt | 0 | 0 | 0.00000 |
| HETATM | 22 | Pt | 0.68921 | 0.34612 | 28.81443 | Pt | 0 | 0 | 0.00000 |
| HETATM | 23 | Pt | 2.08471 | 2.67197 | 29.47213 | Pt | 0 | 0 | 0.00000 |
| HETATM | 24 | Pt | 0.68921 | 4.99775 | 30.13003 | Pt | 0 | 0 | 0.00000 |
| HETATM | 25 | Pt | 2.08471 | 7.32343 | 30.78787 | Pt | 0 | 0 | 0.00000 |
| HETATM | 26 | Pt | 0.68921 | 1.27492 | 31.44707 | Pt | 0 | 0 | 0.00000 |
| HETATM | 27 | Pt | 2.08470 | 3.59976 | 32.10459 | Pt | 0 | 0 | 0.00000 |
| HETATM | 28 | Pt | 0.68920 | 5.92662 | 32.76243 | Pt | 0 | 0 | 0.00000 |
| HETATM | 29 | Pt | 2.08470 | 8.25046 | 33.42173 | Pt | 0 | 0 | 0.00000 |
| HETATM | 30 | Pt | 0.68920 | 2.20179 | 34.08051 | Pt | 0 | 0 | 0.00000 |
| HETATM | 31 | Pt | 2.08470 | 4.52803 | 34.73276 | Pt | 0 | 0 | 0.00000 |
| HETATM | 32 | Pt | 0.68919 | 6.85719 | 35.39886 | Pt | 0 | 0 | 0.00000 |
| HETATM | 33 | Pt | 2.08469 | 0.80394 | 36.05717 | Pt | 0 | 0 | 0.00000 |
| HETATM | 34 | Pt | 0.68919 | 3.13198 | 36.71232 | Pt | 0 | 0 | 0.00000 |
| HETATM | 35 | Pt | 2.08469 | 5.44906 | 37.35290 | Pt | 0 | 0 | 0.00000 |
| HETATM | 36 | Pt | 0.68919 | 7.79707 | 38.05513 | Pt | 0 | 0 | 0.00000 |
| HETATM | 37 | Pt | 2.08469 | 1.73959 | 38.67657 | Pt | 0 | 0 | 0.00000 |
| HETATM | 38 | Pt | 0.68919 | 4.04659 | 39.38427 | Pt | 0 | 0 | 0.00000 |
| HETATM | 39 | Pt | 2.08468 | 6.43251 | 40.02188 | Pt | 0 | 0 | 0.00000 |
| HETATM | 40 | Pt | 0.68918 | 0.37241 | 40.91085 | Pt | 0 | 0 | 0.00000 |
| HETATM | 41 | O  | 2.08468 | 7.54172 | 41.63626 | O  | 0 | 0 | 0.00000 |
| HETATM | 42 | O  | 3.48019 | 2.90110 | 14.02306 | O  | 0 | 0 | 0.00000 |

UNIT ENERGY kcal  
ENERGY -5379.172025  
END

XTLGRF 200  
DESCRP A0155  
REMARK 1x1-fcc-top-{111}-step  
FIXATOMS 15 25  
CRYSTX 2.79100 8.37290 55.65550 90.00000 90.00000 90.00000  
FORMAT ATOM (a6,1x,i5,1x,a5,1x,a3,1x,a1,1x,a5,3f10.5,1x,a5,i3,i2,1x,f8.5)  

|        |    |    |         |         |          |    |   |   |         |
|--------|----|----|---------|---------|----------|----|---|---|---------|
| HETATM | 1  | Pt | 2.07664 | 1.49047 | 14.39017 | Pt | 0 | 0 | 0.00000 |
| HETATM | 2  | Pt | 0.68114 | 3.86453 | 15.62440 | Pt | 0 | 0 | 0.00000 |
| HETATM | 3  | Pt | 2.07664 | 6.28717 | 16.23501 | Pt | 0 | 0 | 0.00000 |
| HETATM | 4  | Pt | 0.68113 | 0.39013 | 16.86084 | Pt | 0 | 0 | 0.00000 |
| HETATM | 5  | Pt | 2.07663 | 2.64857 | 17.66673 | Pt | 0 | 0 | 0.00000 |
| HETATM | 6  | Pt | 0.68112 | 4.98573 | 18.30769 | Pt | 0 | 0 | 0.00000 |
| HETATM | 7  | Pt | 2.07661 | 7.31963 | 18.89144 | Pt | 0 | 0 | 0.00000 |
| HETATM | 8  | Pt | 0.68109 | 1.26503 | 19.63494 | Pt | 0 | 0 | 0.00000 |
| HETATM | 9  | Pt | 2.07657 | 3.59726 | 20.27983 | Pt | 0 | 0 | 0.00000 |
| HETATM | 10 | Pt | 0.68105 | 5.93593 | 20.90888 | Pt | 0 | 0 | 0.00000 |
| HETATM | 11 | Pt | 2.07653 | 8.24373 | 21.57911 | Pt | 0 | 0 | 0.00000 |
| HETATM | 12 | Pt | 0.68099 | 2.20243 | 22.24758 | Pt | 0 | 0 | 0.00000 |
| HETATM | 13 | Pt | 2.07647 | 4.53644 | 22.89374 | Pt | 0 | 0 | 0.00000 |
| HETATM | 14 | Pt | 0.68094 | 6.85800 | 23.55354 | Pt | 0 | 0 | 0.00000 |
| HETATM | 15 | Pt | 2.07638 | 0.81195 | 24.21165 | Pt | 0 | 0 | 0.00000 |
| HETATM | 16 | Pt | 0.68088 | 3.13756 | 24.86952 | Pt | 0 | 0 | 0.00000 |
| HETATM | 17 | Pt | 2.07638 | 5.46324 | 25.52736 | Pt | 0 | 0 | 0.00000 |
| HETATM | 18 | Pt | 0.68088 | 7.78902 | 26.18526 | Pt | 0 | 0 | 0.00000 |
| HETATM | 19 | Pt | 2.07638 | 1.74197 | 26.84296 | Pt | 0 | 0 | 0.00000 |
| HETATM | 20 | Pt | 0.68088 | 4.06784 | 27.50050 | Pt | 0 | 0 | 0.00000 |
| HETATM | 21 | Pt | 2.07638 | 6.39366 | 28.15796 | Pt | 0 | 0 | 0.00000 |
| HETATM | 22 | Pt | 0.68088 | 0.34663 | 28.81550 | Pt | 0 | 0 | 0.00000 |
| HETATM | 23 | Pt | 2.07638 | 2.67248 | 29.47320 | Pt | 0 | 0 | 0.00000 |
| HETATM | 24 | Pt | 0.68088 | 4.99826 | 30.13110 | Pt | 0 | 0 | 0.00000 |
| HETATM | 25 | Pt | 2.07638 | 7.32394 | 30.78894 | Pt | 0 | 0 | 0.00000 |

|                     |    |    |         |          |          |    |   |   |         |
|---------------------|----|----|---------|----------|----------|----|---|---|---------|
| HETATM              | 26 | Pt | 0.68098 | 1.27633  | 31.44526 | Pt | 0 | 0 | 0.00000 |
| HETATM              | 27 | Pt | 2.07653 | 3.59753  | 32.10606 | Pt | 0 | 0 | 0.00000 |
| HETATM              | 28 | Pt | 0.68106 | 5.91629  | 32.76497 | Pt | 0 | 0 | 0.00000 |
| HETATM              | 29 | Pt | 2.07663 | 8.24815  | 33.41064 | Pt | 0 | 0 | 0.00000 |
| HETATM              | 30 | Pt | 0.68117 | 2.20307  | 34.08090 | Pt | 0 | 0 | 0.00000 |
| HETATM              | 31 | Pt | 2.07670 | 4.50884  | 34.75065 | Pt | 0 | 0 | 0.00000 |
| HETATM              | 32 | Pt | 0.68123 | 6.84566  | 35.37937 | Pt | 0 | 0 | 0.00000 |
| HETATM              | 33 | Pt | 2.07676 | 0.80228  | 36.02575 | Pt | 0 | 0 | 0.00000 |
| HETATM              | 34 | Pt | 0.68128 | 3.11831  | 36.76890 | Pt | 0 | 0 | 0.00000 |
| HETATM              | 35 | Pt | 2.07679 | 5.45149  | 37.35177 | Pt | 0 | 0 | 0.00000 |
| HETATM              | 36 | Pt | 0.68130 | 7.78691  | 37.99451 | Pt | 0 | 0 | 0.00000 |
| HETATM              | 37 | Pt | 2.07681 | 1.67077  | 38.80259 | Pt | 0 | 0 | 0.00000 |
| HETATM              | 38 | Pt | 0.68131 | 4.14556  | 39.42448 | Pt | 0 | 0 | 0.00000 |
| HETATM              | 39 | Pt | 2.07681 | 6.56660  | 40.03614 | Pt | 0 | 0 | 0.00000 |
| HETATM              | 40 | Pt | 0.68130 | 0.56462  | 41.27311 | Pt | 0 | 0 | 0.00000 |
| HETATM              | 41 | O  | 2.07680 | 7.55783  | 41.76875 | O  | 0 | 0 | 0.00000 |
| HETATM              | 42 | O  | 2.07681 | 10.31505 | 40.84137 | O  | 0 | 0 | 0.00000 |
| HETATM              | 43 | O  | 3.47214 | 2.86988  | 13.89381 | O  | 0 | 0 | 0.00000 |
| HETATM              | 44 | O  | 3.47213 | 0.11383  | 14.82299 | O  | 0 | 0 | 0.00000 |
| UNIT ENERGY kcal    |    |    |         |          |          |    |   |   |         |
| ENERGY -5538.434693 |    |    |         |          |          |    |   |   |         |
| END                 |    |    |         |          |          |    |   |   |         |
