# Supplementary material for: Development of a ReaxFF potential for Pt–O systems describing the energetics and dynamics of Pt-oxide formation
Source: Royal Society of Chemistry journal article supplement (doi:10.1039/c4cp03111c), 2014-01-01
Supplement: c4cp03111c1.zip [file c4cp03111c1.zip]

```

XTLGRF 200
DESCRP IS
REMARK Pt111_0.11ML_9x9x7_30.0_vac fcc-displacement
FIXATOMS 1 162
CRYSTX 25.12092 25.12092 43.67409 90.00000 90.00000 60.00000
FORMAT ATOM (a6,lx,i5,lx,a5,lx,a3,lx,a1,lx,a5,3f10.5,lx,a5,i3,i2,lx,f8.5)
HETATM 1 Pt 2.20377 19.74305 14.98634 Pt 0 0 0.00000
HETATM 2 Pt 2.20377 2.99577 14.98634 Pt 0 0 0.00000
HETATM 3 Pt 2.20377 11.36941 14.98634 Pt 0 0 0.00000
HETATM 4 Pt 9.45555 23.92987 14.98634 Pt 0 0 0.00000
HETATM 5 Pt 9.45555 7.18259 14.98634 Pt 0 0 0.00000
HETATM 6 Pt 9.45555 15.55623 14.98634 Pt 0 0 0.00000
HETATM 7 Pt 16.70734 28.11669 14.98634 Pt 0 0 0.00000
HETATM 8 Pt 16.70734 11.36941 14.98634 Pt 0 0 0.00000
HETATM 9 Pt 16.70734 19.74305 14.98634 Pt 0 0 0.00000
HETATM 10 Pt 2.20377 22.53426 14.98634 Pt 0 0 0.00000
HETATM 11 Pt 2.20377 5.78698 14.98634 Pt 0 0 0.00000
HETATM 12 Pt 2.20377 14.16062 14.98634 Pt 0 0 0.00000
HETATM 13 Pt 9.45555 26.72108 14.98634 Pt 0 0 0.00000
HETATM 14 Pt 9.45555 9.97380 14.98634 Pt 0 0 0.00000
HETATM 15 Pt 9.45555 18.34744 14.98634 Pt 0 0 0.00000
HETATM 16 Pt 16.70734 30.90790 14.98634 Pt 0 0 0.00000
HETATM 17 Pt 16.70734 14.16062 14.98634 Pt 0 0 0.00000
HETATM 18 Pt 16.70734 22.53426 14.98634 Pt 0 0 0.00000
HETATM 19 Pt 2.20377 25.32547 14.98634 Pt 0 0 0.00000
HETATM 20 Pt 2.20377 8.57819 14.98634 Pt 0 0 0.00000
HETATM 21 Pt 2.20377 16.95183 14.98634 Pt 0 0 0.00000
HETATM 22 Pt 9.45555 29.51229 14.98634 Pt 0 0 0.00000
HETATM 23 Pt 9.45555 12.76501 14.98634 Pt 0 0 0.00000
HETATM 24 Pt 9.45555 21.13865 14.98634 Pt 0 0 0.00000
HETATM 25 Pt 16.70734 33.69911 14.98634 Pt 0 0 0.00000
HETATM 26 Pt 16.70734 16.95183 14.98634 Pt 0 0 0.00000
HETATM 27 Pt 16.70734 25.32547 14.98634 Pt 0 0 0.00000
HETATM 28 Pt 4.62103 21.13866 14.98634 Pt 0 0 0.00000
HETATM 29 Pt 4.62103 4.39138 14.98634 Pt 0 0 0.00000
HETATM 30 Pt 4.62103 12.76502 14.98634 Pt 0 0 0.00000
HETATM 31 Pt 11.87281 25.32548 14.98634 Pt 0 0 0.00000
HETATM 32 Pt 11.87281 8.57820 14.98634 Pt 0 0 0.00000
HETATM 33 Pt 11.87281 16.95184 14.98634 Pt 0 0 0.00000
HETATM 34 Pt 19.12460 29.51230 14.98634 Pt 0 0 0.00000
HETATM 35 Pt 19.12460 12.76502 14.98634 Pt 0 0 0.00000
HETATM 36 Pt 19.12460 21.13866 14.98634 Pt 0 0 0.00000
HETATM 37 Pt 4.62103 23.92987 14.98634 Pt 0 0 0.00000
HETATM 38 Pt 4.62103 7.18259 14.98634 Pt 0 0 0.00000
HETATM 39 Pt 4.62103 15.55623 14.98634 Pt 0 0 0.00000
HETATM 40 Pt 11.87281 28.11669 14.98634 Pt 0 0 0.00000
HETATM 41 Pt 11.87281 11.36941 14.98634 Pt 0 0 0.00000
HETATM 42 Pt 11.87281 19.74305 14.98634 Pt 0 0 0.00000
HETATM 43 Pt 19.12460 32.30351 14.98634 Pt 0 0 0.00000
HETATM 44 Pt 19.12460 15.55623 14.98634 Pt 0 0 0.00000
HETATM 45 Pt 19.12460 23.92987 14.98634 Pt 0 0 0.00000
HETATM 46 Pt 4.62103 26.72108 14.98634 Pt 0 0 0.00000
HETATM 47 Pt 4.62103 9.97380 14.98634 Pt 0 0 0.00000
HETATM 48 Pt 4.62103 18.34744 14.98634 Pt 0 0 0.00000
HETATM 49 Pt 11.87281 30.90790 14.98634 Pt 0 0 0.00000
HETATM 50 Pt 11.87281 14.16062 14.98634 Pt 0 0 0.00000
HETATM 51 Pt 11.87281 22.53426 14.98634 Pt 0 0 0.00000
HETATM 52 Pt 19.12460 35.09472 14.98634 Pt 0 0 0.00000
HETATM 53 Pt 19.12460 18.34744 14.98634 Pt 0 0 0.00000
HETATM 54 Pt 19.12460 26.72108 14.98634 Pt 0 0 0.00000
HETATM 55 Pt 7.03829 22.53426 14.98634 Pt 0 0 0.00000
HETATM 56 Pt 7.03829 5.78698 14.98634 Pt 0 0 0.00000
HETATM 57 Pt 7.03829 14.16062 14.98634 Pt 0 0 0.00000

```

|        |     |    |          |          |          |    |   |   |         |
|--------|-----|----|----------|----------|----------|----|---|---|---------|
| HETATM | 58  | Pt | 14.29007 | 26.72108 | 14.98634 | Pt | 0 | 0 | 0.00000 |
| HETATM | 59  | Pt | 14.29007 | 9.97380  | 14.98634 | Pt | 0 | 0 | 0.00000 |
| HETATM | 60  | Pt | 14.29007 | 18.34744 | 14.98634 | Pt | 0 | 0 | 0.00000 |
| HETATM | 61  | Pt | 21.54186 | 30.90790 | 14.98634 | Pt | 0 | 0 | 0.00000 |
| HETATM | 62  | Pt | 21.54186 | 14.16062 | 14.98634 | Pt | 0 | 0 | 0.00000 |
| HETATM | 63  | Pt | 21.54186 | 22.53426 | 14.98634 | Pt | 0 | 0 | 0.00000 |
| HETATM | 64  | Pt | 7.03829  | 25.32547 | 14.98634 | Pt | 0 | 0 | 0.00000 |
| HETATM | 65  | Pt | 7.03829  | 8.57819  | 14.98634 | Pt | 0 | 0 | 0.00000 |
| HETATM | 66  | Pt | 7.03829  | 16.95183 | 14.98634 | Pt | 0 | 0 | 0.00000 |
| HETATM | 67  | Pt | 14.29007 | 29.51229 | 14.98634 | Pt | 0 | 0 | 0.00000 |
| HETATM | 68  | Pt | 14.29007 | 12.76501 | 14.98634 | Pt | 0 | 0 | 0.00000 |
| HETATM | 69  | Pt | 14.29007 | 21.13865 | 14.98634 | Pt | 0 | 0 | 0.00000 |
| HETATM | 70  | Pt | 21.54186 | 33.69911 | 14.98634 | Pt | 0 | 0 | 0.00000 |
| HETATM | 71  | Pt | 21.54186 | 16.95183 | 14.98634 | Pt | 0 | 0 | 0.00000 |
| HETATM | 72  | Pt | 21.54186 | 25.32547 | 14.98634 | Pt | 0 | 0 | 0.00000 |
| HETATM | 73  | Pt | 7.03829  | 28.11669 | 14.98634 | Pt | 0 | 0 | 0.00000 |
| HETATM | 74  | Pt | 7.03829  | 11.36941 | 14.98634 | Pt | 0 | 0 | 0.00000 |
| HETATM | 75  | Pt | 7.03829  | 19.74305 | 14.98634 | Pt | 0 | 0 | 0.00000 |
| HETATM | 76  | Pt | 14.29007 | 32.30351 | 14.98634 | Pt | 0 | 0 | 0.00000 |
| HETATM | 77  | Pt | 14.29007 | 15.55623 | 14.98634 | Pt | 0 | 0 | 0.00000 |
| HETATM | 78  | Pt | 14.29007 | 23.92987 | 14.98634 | Pt | 0 | 0 | 0.00000 |
| HETATM | 79  | Pt | 21.54186 | 36.49033 | 14.98634 | Pt | 0 | 0 | 0.00000 |
| HETATM | 80  | Pt | 21.54186 | 19.74305 | 14.98634 | Pt | 0 | 0 | 0.00000 |
| HETATM | 81  | Pt | 21.54186 | 28.11669 | 14.98634 | Pt | 0 | 0 | 0.00000 |
| HETATM | 82  | Pt | 3.00952  | 21.13866 | 17.26536 | Pt | 0 | 0 | 0.00000 |
| HETATM | 83  | Pt | 3.00952  | 4.39138  | 17.26536 | Pt | 0 | 0 | 0.00000 |
| HETATM | 84  | Pt | 3.00952  | 12.76502 | 17.26536 | Pt | 0 | 0 | 0.00000 |
| HETATM | 85  | Pt | 10.26130 | 25.32548 | 17.26536 | Pt | 0 | 0 | 0.00000 |
| HETATM | 86  | Pt | 10.26130 | 8.57820  | 17.26536 | Pt | 0 | 0 | 0.00000 |
| HETATM | 87  | Pt | 10.26130 | 16.95184 | 17.26536 | Pt | 0 | 0 | 0.00000 |
| HETATM | 88  | Pt | 17.51309 | 29.51230 | 17.26536 | Pt | 0 | 0 | 0.00000 |
| HETATM | 89  | Pt | 17.51309 | 12.76502 | 17.26536 | Pt | 0 | 0 | 0.00000 |
| HETATM | 90  | Pt | 17.51309 | 21.13866 | 17.26536 | Pt | 0 | 0 | 0.00000 |
| HETATM | 91  | Pt | 3.00952  | 23.92987 | 17.26536 | Pt | 0 | 0 | 0.00000 |
| HETATM | 92  | Pt | 3.00952  | 7.18259  | 17.26536 | Pt | 0 | 0 | 0.00000 |
| HETATM | 93  | Pt | 3.00952  | 15.55623 | 17.26536 | Pt | 0 | 0 | 0.00000 |
| HETATM | 94  | Pt | 10.26130 | 28.11669 | 17.26536 | Pt | 0 | 0 | 0.00000 |
| HETATM | 95  | Pt | 10.26130 | 11.36941 | 17.26536 | Pt | 0 | 0 | 0.00000 |
| HETATM | 96  | Pt | 10.26130 | 19.74305 | 17.26536 | Pt | 0 | 0 | 0.00000 |
| HETATM | 97  | Pt | 17.51309 | 32.30351 | 17.26536 | Pt | 0 | 0 | 0.00000 |
| HETATM | 98  | Pt | 17.51309 | 15.55623 | 17.26536 | Pt | 0 | 0 | 0.00000 |
| HETATM | 99  | Pt | 17.51309 | 23.92987 | 17.26536 | Pt | 0 | 0 | 0.00000 |
| HETATM | 100 | Pt | 3.00952  | 26.72108 | 17.26536 | Pt | 0 | 0 | 0.00000 |
| HETATM | 101 | Pt | 3.00952  | 9.97380  | 17.26536 | Pt | 0 | 0 | 0.00000 |
| HETATM | 102 | Pt | 3.00952  | 18.34744 | 17.26536 | Pt | 0 | 0 | 0.00000 |
| HETATM | 103 | Pt | 10.26130 | 30.90790 | 17.26536 | Pt | 0 | 0 | 0.00000 |
| HETATM | 104 | Pt | 10.26130 | 14.16062 | 17.26536 | Pt | 0 | 0 | 0.00000 |
| HETATM | 105 | Pt | 10.26130 | 22.53426 | 17.26536 | Pt | 0 | 0 | 0.00000 |
| HETATM | 106 | Pt | 17.51309 | 35.09472 | 17.26536 | Pt | 0 | 0 | 0.00000 |
| HETATM | 107 | Pt | 17.51309 | 18.34744 | 17.26536 | Pt | 0 | 0 | 0.00000 |
| HETATM | 108 | Pt | 17.51309 | 26.72108 | 17.26536 | Pt | 0 | 0 | 0.00000 |
| HETATM | 109 | Pt | 5.42678  | 22.53426 | 17.26536 | Pt | 0 | 0 | 0.00000 |
| HETATM | 110 | Pt | 5.42678  | 5.78698  | 17.26536 | Pt | 0 | 0 | 0.00000 |
| HETATM | 111 | Pt | 5.42678  | 14.16062 | 17.26536 | Pt | 0 | 0 | 0.00000 |
| HETATM | 112 | Pt | 12.67856 | 26.72108 | 17.26536 | Pt | 0 | 0 | 0.00000 |
| HETATM | 113 | Pt | 12.67856 | 9.97380  | 17.26536 | Pt | 0 | 0 | 0.00000 |
| HETATM | 114 | Pt | 12.67856 | 18.34744 | 17.26536 | Pt | 0 | 0 | 0.00000 |
| HETATM | 115 | Pt | 19.93035 | 30.90790 | 17.26536 | Pt | 0 | 0 | 0.00000 |
| HETATM | 116 | Pt | 19.93035 | 14.16062 | 17.26536 | Pt | 0 | 0 | 0.00000 |
| HETATM | 117 | Pt | 19.93035 | 22.53426 | 17.26536 | Pt | 0 | 0 | 0.00000 |
| HETATM | 118 | Pt | 5.42678  | 25.32547 | 17.26536 | Pt | 0 | 0 | 0.00000 |
| HETATM | 119 | Pt | 5.42678  | 8.57819  | 17.26536 | Pt | 0 | 0 | 0.00000 |
| HETATM | 120 | Pt | 5.42678  | 16.95183 | 17.26536 | Pt | 0 | 0 | 0.00000 |

|        |     |    |          |          |          |    |   |   |         |
|--------|-----|----|----------|----------|----------|----|---|---|---------|
| HETATM | 121 | Pt | 12.67856 | 29.51229 | 17.26536 | Pt | 0 | 0 | 0.00000 |
| HETATM | 122 | Pt | 12.67856 | 12.76501 | 17.26536 | Pt | 0 | 0 | 0.00000 |
| HETATM | 123 | Pt | 12.67856 | 21.13865 | 17.26536 | Pt | 0 | 0 | 0.00000 |
| HETATM | 124 | Pt | 19.93035 | 33.69911 | 17.26536 | Pt | 0 | 0 | 0.00000 |
| HETATM | 125 | Pt | 19.93035 | 16.95183 | 17.26536 | Pt | 0 | 0 | 0.00000 |
| HETATM | 126 | Pt | 19.93035 | 25.32547 | 17.26536 | Pt | 0 | 0 | 0.00000 |
| HETATM | 127 | Pt | 5.42678  | 28.11669 | 17.26536 | Pt | 0 | 0 | 0.00000 |
| HETATM | 128 | Pt | 5.42678  | 11.36941 | 17.26536 | Pt | 0 | 0 | 0.00000 |
| HETATM | 129 | Pt | 5.42678  | 19.74305 | 17.26536 | Pt | 0 | 0 | 0.00000 |
| HETATM | 130 | Pt | 12.67856 | 32.30351 | 17.26536 | Pt | 0 | 0 | 0.00000 |
| HETATM | 131 | Pt | 12.67856 | 15.55623 | 17.26536 | Pt | 0 | 0 | 0.00000 |
| HETATM | 132 | Pt | 12.67856 | 23.92987 | 17.26536 | Pt | 0 | 0 | 0.00000 |
| HETATM | 133 | Pt | 19.93035 | 36.49033 | 17.26536 | Pt | 0 | 0 | 0.00000 |
| HETATM | 134 | Pt | 19.93035 | 19.74305 | 17.26536 | Pt | 0 | 0 | 0.00000 |
| HETATM | 135 | Pt | 19.93035 | 28.11669 | 17.26536 | Pt | 0 | 0 | 0.00000 |
| HETATM | 136 | Pt | 7.84404  | 23.92987 | 17.26536 | Pt | 0 | 0 | 0.00000 |
| HETATM | 137 | Pt | 7.84404  | 7.18259  | 17.26536 | Pt | 0 | 0 | 0.00000 |
| HETATM | 138 | Pt | 7.84404  | 15.55623 | 17.26536 | Pt | 0 | 0 | 0.00000 |
| HETATM | 139 | Pt | 15.09582 | 28.11669 | 17.26536 | Pt | 0 | 0 | 0.00000 |
| HETATM | 140 | Pt | 15.09582 | 11.36941 | 17.26536 | Pt | 0 | 0 | 0.00000 |
| HETATM | 141 | Pt | 15.09582 | 19.74305 | 17.26536 | Pt | 0 | 0 | 0.00000 |
| HETATM | 142 | Pt | 0.59226  | 19.74305 | 17.26536 | Pt | 0 | 0 | 0.00000 |
| HETATM | 143 | Pt | 0.59226  | 2.99577  | 17.26536 | Pt | 0 | 0 | 0.00000 |
| HETATM | 144 | Pt | 0.59226  | 11.36941 | 17.26536 | Pt | 0 | 0 | 0.00000 |
| HETATM | 145 | Pt | 7.84404  | 26.72108 | 17.26536 | Pt | 0 | 0 | 0.00000 |
| HETATM | 146 | Pt | 7.84404  | 9.97380  | 17.26536 | Pt | 0 | 0 | 0.00000 |
| HETATM | 147 | Pt | 7.84404  | 18.34744 | 17.26536 | Pt | 0 | 0 | 0.00000 |
| HETATM | 148 | Pt | 15.09582 | 30.90790 | 17.26536 | Pt | 0 | 0 | 0.00000 |
| HETATM | 149 | Pt | 15.09582 | 14.16062 | 17.26536 | Pt | 0 | 0 | 0.00000 |
| HETATM | 150 | Pt | 15.09582 | 22.53426 | 17.26536 | Pt | 0 | 0 | 0.00000 |
| HETATM | 151 | Pt | 0.59226  | 22.53426 | 17.26536 | Pt | 0 | 0 | 0.00000 |
| HETATM | 152 | Pt | 0.59226  | 5.78698  | 17.26536 | Pt | 0 | 0 | 0.00000 |
| HETATM | 153 | Pt | 0.59226  | 14.16062 | 17.26536 | Pt | 0 | 0 | 0.00000 |
| HETATM | 154 | Pt | 7.84404  | 29.51229 | 17.26536 | Pt | 0 | 0 | 0.00000 |
| HETATM | 155 | Pt | 7.84404  | 12.76501 | 17.26536 | Pt | 0 | 0 | 0.00000 |
| HETATM | 156 | Pt | 7.84404  | 21.13865 | 17.26536 | Pt | 0 | 0 | 0.00000 |
| HETATM | 157 | Pt | 15.09582 | 33.69911 | 17.26536 | Pt | 0 | 0 | 0.00000 |
| HETATM | 158 | Pt | 15.09582 | 16.95183 | 17.26536 | Pt | 0 | 0 | 0.00000 |
| HETATM | 159 | Pt | 15.09582 | 25.32547 | 17.26536 | Pt | 0 | 0 | 0.00000 |
| HETATM | 160 | Pt | 0.59226  | 25.32547 | 17.26536 | Pt | 0 | 0 | 0.00000 |
| HETATM | 161 | Pt | 0.59226  | 8.57819  | 17.26536 | Pt | 0 | 0 | 0.00000 |
| HETATM | 162 | Pt | 0.59226  | 16.95183 | 17.26536 | Pt | 0 | 0 | 0.00000 |
| HETATM | 163 | Pt | 3.81486  | 22.53389 | 19.54433 | Pt | 0 | 0 | 0.00000 |
| HETATM | 164 | Pt | 3.81500  | 5.78682  | 19.54401 | Pt | 0 | 0 | 0.00000 |
| HETATM | 165 | Pt | 3.81520  | 14.16052 | 19.54536 | Pt | 0 | 0 | 0.00000 |
| HETATM | 166 | Pt | 11.06727 | 26.72077 | 19.54468 | Pt | 0 | 0 | 0.00000 |
| HETATM | 167 | Pt | 11.06716 | 9.97355  | 19.54506 | Pt | 0 | 0 | 0.00000 |
| HETATM | 168 | Pt | 11.06724 | 18.34762 | 19.54258 | Pt | 0 | 0 | 0.00000 |
| HETATM | 169 | Pt | 18.31866 | 30.90763 | 19.54454 | Pt | 0 | 0 | 0.00000 |
| HETATM | 170 | Pt | 18.31893 | 14.16017 | 19.54424 | Pt | 0 | 0 | 0.00000 |
| HETATM | 171 | Pt | 18.31851 | 22.53413 | 19.54487 | Pt | 0 | 0 | 0.00000 |
| HETATM | 172 | Pt | 3.81516  | 25.32551 | 19.54284 | Pt | 0 | 0 | 0.00000 |
| HETATM | 173 | Pt | 3.81517  | 8.57844  | 19.54343 | Pt | 0 | 0 | 0.00000 |
| HETATM | 174 | Pt | 3.81549  | 16.95159 | 19.54415 | Pt | 0 | 0 | 0.00000 |
| HETATM | 175 | Pt | 11.06750 | 29.51243 | 19.54358 | Pt | 0 | 0 | 0.00000 |
| HETATM | 176 | Pt | 11.06714 | 12.76453 | 19.54319 | Pt | 0 | 0 | 0.00000 |
| HETATM | 177 | Pt | 11.06733 | 21.13882 | 19.54325 | Pt | 0 | 0 | 0.00000 |
| HETATM | 178 | Pt | 18.31867 | 33.69903 | 19.54366 | Pt | 0 | 0 | 0.00000 |
| HETATM | 179 | Pt | 18.31921 | 16.95199 | 19.54318 | Pt | 0 | 0 | 0.00000 |
| HETATM | 180 | Pt | 18.31888 | 25.32550 | 19.54351 | Pt | 0 | 0 | 0.00000 |
| HETATM | 181 | Pt | 3.81511  | 2.99605  | 19.54385 | Pt | 0 | 0 | 0.00000 |
| HETATM | 182 | Pt | 3.81503  | 11.36996 | 19.54507 | Pt | 0 | 0 | 0.00000 |
| HETATM | 183 | Pt | 3.81515  | 19.74287 | 19.54489 | Pt | 0 | 0 | 0.00000 |

|        |     |    |          |          |          |    |   |   |         |
|--------|-----|----|----------|----------|----------|----|---|---|---------|
| HETATM | 184 | Pt | 11.06728 | 7.18311  | 19.54507 | Pt | 0 | 0 | 0.00000 |
| HETATM | 185 | Pt | 11.06713 | 15.55610 | 19.54268 | Pt | 0 | 0 | 0.00000 |
| HETATM | 186 | Pt | 11.06727 | 23.92989 | 19.54489 | Pt | 0 | 0 | 0.00000 |
| HETATM | 187 | Pt | 18.31828 | 11.36947 | 19.54507 | Pt | 0 | 0 | 0.00000 |
| HETATM | 188 | Pt | 18.31848 | 19.74353 | 19.54507 | Pt | 0 | 0 | 0.00000 |
| HETATM | 189 | Pt | 18.31871 | 28.11691 | 19.54450 | Pt | 0 | 0 | 0.00000 |
| HETATM | 190 | Pt | 6.23225  | 23.93036 | 19.54267 | Pt | 0 | 0 | 0.00000 |
| HETATM | 191 | Pt | 6.23235  | 7.18242  | 19.54283 | Pt | 0 | 0 | 0.00000 |
| HETATM | 192 | Pt | 6.23225  | 15.55601 | 19.54374 | Pt | 0 | 0 | 0.00000 |
| HETATM | 193 | Pt | 13.48447 | 28.11677 | 19.54348 | Pt | 0 | 0 | 0.00000 |
| HETATM | 194 | Pt | 13.48431 | 11.36942 | 19.54435 | Pt | 0 | 0 | 0.00000 |
| HETATM | 195 | Pt | 13.48465 | 19.74318 | 19.54374 | Pt | 0 | 0 | 0.00000 |
| HETATM | 196 | Pt | 20.73595 | 32.30341 | 19.54348 | Pt | 0 | 0 | 0.00000 |
| HETATM | 197 | Pt | 20.73634 | 15.55630 | 19.54283 | Pt | 0 | 0 | 0.00000 |
| HETATM | 198 | Pt | 20.73596 | 23.93012 | 19.54365 | Pt | 0 | 0 | 0.00000 |
| HETATM | 199 | Pt | 6.23255  | 26.72119 | 19.54284 | Pt | 0 | 0 | 0.00000 |
| HETATM | 200 | Pt | 6.23221  | 9.97356  | 19.54318 | Pt | 0 | 0 | 0.00000 |
| HETATM | 201 | Pt | 6.23225  | 18.34729 | 19.54325 | Pt | 0 | 0 | 0.00000 |
| HETATM | 202 | Pt | 13.48447 | 30.90801 | 19.54366 | Pt | 0 | 0 | 0.00000 |
| HETATM | 203 | Pt | 13.48469 | 14.16031 | 19.54318 | Pt | 0 | 0 | 0.00000 |
| HETATM | 204 | Pt | 13.48441 | 22.53395 | 19.54415 | Pt | 0 | 0 | 0.00000 |
| HETATM | 205 | Pt | 20.73576 | 35.09440 | 19.54358 | Pt | 0 | 0 | 0.00000 |
| HETATM | 206 | Pt | 20.73594 | 18.34766 | 19.54342 | Pt | 0 | 0 | 0.00000 |
| HETATM | 207 | Pt | 20.73606 | 26.72106 | 19.54351 | Pt | 0 | 0 | 0.00000 |
| HETATM | 208 | Pt | 6.23234  | 4.39134  | 19.54393 | Pt | 0 | 0 | 0.00000 |
| HETATM | 209 | Pt | 6.23182  | 12.76472 | 19.54461 | Pt | 0 | 0 | 0.00000 |
| HETATM | 210 | Pt | 6.23174  | 21.13912 | 19.54359 | Pt | 0 | 0 | 0.00000 |
| HETATM | 211 | Pt | 13.48413 | 8.57844  | 19.54532 | Pt | 0 | 0 | 0.00000 |
| HETATM | 212 | Pt | 13.48508 | 16.95194 | 19.54321 | Pt | 0 | 0 | 0.00000 |
| HETATM | 213 | Pt | 13.48419 | 25.32534 | 19.54461 | Pt | 0 | 0 | 0.00000 |
| HETATM | 214 | Pt | 20.73562 | 12.76476 | 19.54438 | Pt | 0 | 0 | 0.00000 |
| HETATM | 215 | Pt | 20.73556 | 21.13895 | 19.54477 | Pt | 0 | 0 | 0.00000 |
| HETATM | 216 | Pt | 20.73580 | 29.51224 | 19.54446 | Pt | 0 | 0 | 0.00000 |
| HETATM | 217 | Pt | 8.65032  | 25.32565 | 19.54433 | Pt | 0 | 0 | 0.00000 |
| HETATM | 218 | Pt | 8.65014  | 8.57789  | 19.54424 | Pt | 0 | 0 | 0.00000 |
| HETATM | 219 | Pt | 8.64955  | 16.95176 | 19.54258 | Pt | 0 | 0 | 0.00000 |
| HETATM | 220 | Pt | 15.90190 | 29.51232 | 19.54454 | Pt | 0 | 0 | 0.00000 |
| HETATM | 221 | Pt | 15.90174 | 12.76480 | 19.54505 | Pt | 0 | 0 | 0.00000 |
| HETATM | 222 | Pt | 15.90170 | 21.13866 | 19.54536 | Pt | 0 | 0 | 0.00000 |
| HETATM | 223 | Pt | 1.39818  | 21.13831 | 19.54467 | Pt | 0 | 0 | 0.00000 |
| HETATM | 224 | Pt | 1.39829  | 4.39153  | 19.54401 | Pt | 0 | 0 | 0.00000 |
| HETATM | 225 | Pt | 1.39829  | 12.76523 | 19.54487 | Pt | 0 | 0 | 0.00000 |
| HETATM | 226 | Pt | 8.65029  | 28.11649 | 19.54431 | Pt | 0 | 0 | 0.00000 |
| HETATM | 227 | Pt | 8.64962  | 11.36845 | 19.54390 | Pt | 0 | 0 | 0.00000 |
| HETATM | 228 | Pt | 8.64945  | 19.74365 | 19.54252 | Pt | 0 | 0 | 0.00000 |
| HETATM | 229 | Pt | 15.90170 | 32.30330 | 19.54468 | Pt | 0 | 0 | 0.00000 |
| HETATM | 230 | Pt | 15.90250 | 15.55590 | 19.54390 | Pt | 0 | 0 | 0.00000 |
| HETATM | 231 | Pt | 15.90171 | 23.92956 | 19.54467 | Pt | 0 | 0 | 0.00000 |
| HETATM | 232 | Pt | 1.39793  | 23.92934 | 19.54431 | Pt | 0 | 0 | 0.00000 |
| HETATM | 233 | Pt | 1.39797  | 7.18267  | 19.54444 | Pt | 0 | 0 | 0.00000 |
| HETATM | 234 | Pt | 1.39821  | 15.55596 | 19.54467 | Pt | 0 | 0 | 0.00000 |
| HETATM | 235 | Pt | 8.65026  | 5.78727  | 19.54438 | Pt | 0 | 0 | 0.00000 |
| HETATM | 236 | Pt | 8.64932  | 14.16001 | 19.54321 | Pt | 0 | 0 | 0.00000 |
| HETATM | 237 | Pt | 8.64979  | 22.53518 | 19.54359 | Pt | 0 | 0 | 0.00000 |
| HETATM | 238 | Pt | 15.90146 | 9.97409  | 19.54531 | Pt | 0 | 0 | 0.00000 |
| HETATM | 239 | Pt | 15.90218 | 18.34791 | 19.54461 | Pt | 0 | 0 | 0.00000 |
| HETATM | 240 | Pt | 15.90178 | 26.72131 | 19.54445 | Pt | 0 | 0 | 0.00000 |
| HETATM | 241 | Pt | 1.39814  | 1.60031  | 19.54393 | Pt | 0 | 0 | 0.00000 |
| HETATM | 242 | Pt | 1.39802  | 9.97442  | 19.54476 | Pt | 0 | 0 | 0.00000 |
| HETATM | 243 | Pt | 1.39819  | 18.34748 | 19.54460 | Pt | 0 | 0 | 0.00000 |
| HETATM | 244 | Pt | 2.20437  | 19.74317 | 21.82545 | Pt | 0 | 0 | 0.00000 |
| HETATM | 245 | Pt | 2.20429  | 2.99649  | 21.82374 | Pt | 0 | 0 | 0.00000 |
| HETATM | 246 | Pt | 2.20429  | 11.37091 | 21.82585 | Pt | 0 | 0 | 0.00000 |

|        |     |    |          |          |          |    |   |   |         |
|--------|-----|----|----------|----------|----------|----|---|---|---------|
| HETATM | 247 | Pt | 9.45642  | 23.93066 | 21.82477 | Pt | 0 | 0 | 0.00000 |
| HETATM | 248 | Pt | 9.45642  | 7.18355  | 21.82529 | Pt | 0 | 0 | 0.00000 |
| HETATM | 249 | Pt | 9.45495  | 15.55569 | 21.81947 | Pt | 0 | 0 | 0.00000 |
| HETATM | 250 | Pt | 16.70782 | 28.11743 | 21.82496 | Pt | 0 | 0 | 0.00000 |
| HETATM | 251 | Pt | 16.70682 | 11.37016 | 21.82699 | Pt | 0 | 0 | 0.00000 |
| HETATM | 252 | Pt | 16.70696 | 19.74402 | 21.82685 | Pt | 0 | 0 | 0.00000 |
| HETATM | 253 | Pt | 2.20404  | 22.53301 | 21.82489 | Pt | 0 | 0 | 0.00000 |
| HETATM | 254 | Pt | 2.20407  | 5.78645  | 21.82418 | Pt | 0 | 0 | 0.00000 |
| HETATM | 255 | Pt | 2.20436  | 14.16026 | 21.82589 | Pt | 0 | 0 | 0.00000 |
| HETATM | 256 | Pt | 9.45650  | 26.72021 | 21.82489 | Pt | 0 | 0 | 0.00000 |
| HETATM | 257 | Pt | 9.45613  | 9.97243  | 21.82451 | Pt | 0 | 0 | 0.00000 |
| HETATM | 258 | Pt | 9.45514  | 18.34815 | 21.81854 | Pt | 0 | 0 | 0.00000 |
| HETATM | 259 | Pt | 16.70778 | 30.90712 | 21.82510 | Pt | 0 | 0 | 0.00000 |
| HETATM | 260 | Pt | 16.70823 | 14.15944 | 21.82451 | Pt | 0 | 0 | 0.00000 |
| HETATM | 261 | Pt | 16.70735 | 22.53357 | 21.82589 | Pt | 0 | 0 | 0.00000 |
| HETATM | 262 | Pt | 2.20488  | 25.32521 | 21.82105 | Pt | 0 | 0 | 0.00000 |
| HETATM | 263 | Pt | 2.20478  | 8.57879  | 21.82213 | Pt | 0 | 0 | 0.00000 |
| HETATM | 264 | Pt | 2.20517  | 16.95164 | 21.82255 | Pt | 0 | 0 | 0.00000 |
| HETATM | 265 | Pt | 9.45731  | 29.51237 | 21.82183 | Pt | 0 | 0 | 0.00000 |
| HETATM | 266 | Pt | 9.45600  | 12.76349 | 21.82004 | Pt | 0 | 0 | 0.00000 |
| HETATM | 267 | Pt | 9.45612  | 21.14002 | 21.81952 | Pt | 0 | 0 | 0.00000 |
| HETATM | 268 | Pt | 16.70819 | 33.69911 | 21.82276 | Pt | 0 | 0 | 0.00000 |
| HETATM | 269 | Pt | 16.70885 | 16.95195 | 21.82165 | Pt | 0 | 0 | 0.00000 |
| HETATM | 270 | Pt | 16.70849 | 25.32548 | 21.82210 | Pt | 0 | 0 | 0.00000 |
| HETATM | 271 | Pt | 4.61990  | 21.13829 | 21.82477 | Pt | 0 | 0 | 0.00000 |
| HETATM | 272 | Pt | 4.62013  | 4.39128  | 21.82374 | Pt | 0 | 0 | 0.00000 |
| HETATM | 273 | Pt | 4.62037  | 12.76582 | 21.82685 | Pt | 0 | 0 | 0.00000 |
| HETATM | 274 | Pt | 11.87240 | 25.32500 | 21.82545 | Pt | 0 | 0 | 0.00000 |
| HETATM | 275 | Pt | 11.87241 | 8.57901  | 21.82699 | Pt | 0 | 0 | 0.00000 |
| HETATM | 276 | Pt | 11.87358 | 16.95208 | 21.81947 | Pt | 0 | 0 | 0.00000 |
| HETATM | 277 | Pt | 19.12371 | 29.51224 | 21.82496 | Pt | 0 | 0 | 0.00000 |
| HETATM | 278 | Pt | 19.12333 | 12.76473 | 21.82529 | Pt | 0 | 0 | 0.00000 |
| HETATM | 279 | Pt | 19.12303 | 21.13895 | 21.82585 | Pt | 0 | 0 | 0.00000 |
| HETATM | 280 | Pt | 4.62055  | 23.92983 | 21.82052 | Pt | 0 | 0 | 0.00000 |
| HETATM | 281 | Pt | 4.62059  | 7.18229  | 21.82081 | Pt | 0 | 0 | 0.00000 |
| HETATM | 282 | Pt | 4.62147  | 15.55610 | 21.82405 | Pt | 0 | 0 | 0.00000 |
| HETATM | 283 | Pt | 11.87315 | 28.11647 | 21.82190 | Pt | 0 | 0 | 0.00000 |
| HETATM | 284 | Pt | 11.87301 | 11.36939 | 21.82341 | Pt | 0 | 0 | 0.00000 |
| HETATM | 285 | Pt | 11.87306 | 19.74274 | 21.82119 | Pt | 0 | 0 | 0.00000 |
| HETATM | 286 | Pt | 19.12430 | 32.30317 | 21.82185 | Pt | 0 | 0 | 0.00000 |
| HETATM | 287 | Pt | 19.12535 | 15.55599 | 21.82027 | Pt | 0 | 0 | 0.00000 |
| HETATM | 288 | Pt | 19.12424 | 23.92985 | 21.82211 | Pt | 0 | 0 | 0.00000 |
| HETATM | 289 | Pt | 4.62086  | 26.72137 | 21.82040 | Pt | 0 | 0 | 0.00000 |
| HETATM | 290 | Pt | 4.62091  | 9.97452  | 21.82198 | Pt | 0 | 0 | 0.00000 |
| HETATM | 291 | Pt | 4.62151  | 18.34682 | 21.82321 | Pt | 0 | 0 | 0.00000 |
| HETATM | 292 | Pt | 11.87321 | 30.90852 | 21.82227 | Pt | 0 | 0 | 0.00000 |
| HETATM | 293 | Pt | 11.87301 | 14.16027 | 21.81996 | Pt | 0 | 0 | 0.00000 |
| HETATM | 294 | Pt | 11.87311 | 22.53353 | 21.82321 | Pt | 0 | 0 | 0.00000 |
| HETATM | 295 | Pt | 19.12386 | 35.09468 | 21.82227 | Pt | 0 | 0 | 0.00000 |
| HETATM | 296 | Pt | 19.12403 | 18.34790 | 21.82198 | Pt | 0 | 0 | 0.00000 |
| HETATM | 297 | Pt | 19.12445 | 26.72132 | 21.82180 | Pt | 0 | 0 | 0.00000 |
| HETATM | 298 | Pt | 7.03717  | 22.53620 | 21.82018 | Pt | 0 | 0 | 0.00000 |
| HETATM | 299 | Pt | 7.03780  | 5.78771  | 21.82102 | Pt | 0 | 0 | 0.00000 |
| HETATM | 300 | Pt | 7.03711  | 14.16089 | 21.82213 | Pt | 0 | 0 | 0.00000 |
| HETATM | 301 | Pt | 14.28964 | 26.72203 | 21.82201 | Pt | 0 | 0 | 0.00000 |
| HETATM | 302 | Pt | 14.28922 | 9.97527  | 21.82453 | Pt | 0 | 0 | 0.00000 |
| HETATM | 303 | Pt | 14.29043 | 18.34860 | 21.82213 | Pt | 0 | 0 | 0.00000 |
| HETATM | 304 | Pt | 21.54125 | 30.90874 | 21.82201 | Pt | 0 | 0 | 0.00000 |
| HETATM | 305 | Pt | 21.54147 | 14.16141 | 21.82102 | Pt | 0 | 0 | 0.00000 |
| HETATM | 306 | Pt | 21.54096 | 22.53581 | 21.82253 | Pt | 0 | 0 | 0.00000 |
| HETATM | 307 | Pt | 7.03855  | 25.32587 | 21.82052 | Pt | 0 | 0 | 0.00000 |
| HETATM | 308 | Pt | 7.03811  | 8.57742  | 21.82027 | Pt | 0 | 0 | 0.00000 |
| HETATM | 309 | Pt | 7.03843  | 16.95146 | 21.82119 | Pt | 0 | 0 | 0.00000 |

|        |     |    |          |          |          |    |   |   |         |
|--------|-----|----|----------|----------|----------|----|---|---|---------|
| HETATM | 310 | Pt | 14.29051 | 29.51238 | 21.82185 | Pt | 0 | 0 | 0.00000 |
| HETATM | 311 | Pt | 14.28999 | 12.76483 | 21.82340 | Pt | 0 | 0 | 0.00000 |
| HETATM | 312 | Pt | 14.28996 | 21.13820 | 21.82405 | Pt | 0 | 0 | 0.00000 |
| HETATM | 313 | Pt | 21.54188 | 33.69871 | 21.82190 | Pt | 0 | 0 | 0.00000 |
| HETATM | 314 | Pt | 21.54233 | 16.95206 | 21.82080 | Pt | 0 | 0 | 0.00000 |
| HETATM | 315 | Pt | 21.54205 | 25.32577 | 21.82211 | Pt | 0 | 0 | 0.00000 |
| HETATM | 316 | Pt | 7.03795  | 28.11558 | 21.82105 | Pt | 0 | 0 | 0.00000 |
| HETATM | 317 | Pt | 7.03742  | 11.36815 | 21.82166 | Pt | 0 | 0 | 0.00000 |
| HETATM | 318 | Pt | 7.03682  | 19.74323 | 21.81952 | Pt | 0 | 0 | 0.00000 |
| HETATM | 319 | Pt | 14.28965 | 32.30276 | 21.82276 | Pt | 0 | 0 | 0.00000 |
| HETATM | 320 | Pt | 14.29117 | 15.55508 | 21.82004 | Pt | 0 | 0 | 0.00000 |
| HETATM | 321 | Pt | 14.28954 | 23.92855 | 21.82255 | Pt | 0 | 0 | 0.00000 |
| HETATM | 322 | Pt | 21.54091 | 36.48884 | 21.82183 | Pt | 0 | 0 | 0.00000 |
| HETATM | 323 | Pt | 21.54083 | 19.74247 | 21.82213 | Pt | 0 | 0 | 0.00000 |
| HETATM | 324 | Pt | 21.54127 | 28.11569 | 21.82210 | Pt | 0 | 0 | 0.00000 |
| HETATM | 325 | Pt | 3.00999  | 21.13781 | 24.11214 | Pt | 0 | 0 | 0.00000 |
| HETATM | 326 | Pt | 3.00961  | 4.39122  | 24.11026 | Pt | 0 | 0 | 0.00000 |
| HETATM | 327 | Pt | 3.01059  | 12.76656 | 24.11388 | Pt | 0 | 0 | 0.00000 |
| HETATM | 328 | Pt | 10.26179 | 25.32464 | 24.11214 | Pt | 0 | 0 | 0.00000 |
| HETATM | 329 | Pt | 10.26162 | 8.57903  | 24.11370 | Pt | 0 | 0 | 0.00000 |
| HETATM | 330 | Pt | 10.26110 | 16.95218 | 24.09339 | Pt | 0 | 0 | 0.00000 |
| HETATM | 331 | Pt | 17.51314 | 29.51221 | 24.11196 | Pt | 0 | 0 | 0.00000 |
| HETATM | 332 | Pt | 17.51220 | 12.76516 | 24.11370 | Pt | 0 | 0 | 0.00000 |
| HETATM | 333 | Pt | 17.51121 | 21.13850 | 24.11388 | Pt | 0 | 0 | 0.00000 |
| HETATM | 334 | Pt | 3.01091  | 23.92749 | 24.10132 | Pt | 0 | 0 | 0.00000 |
| HETATM | 335 | Pt | 3.01053  | 7.18064  | 24.10141 | Pt | 0 | 0 | 0.00000 |
| HETATM | 336 | Pt | 3.01174  | 15.55472 | 24.10415 | Pt | 0 | 0 | 0.00000 |
| HETATM | 337 | Pt | 10.26322 | 28.11434 | 24.10223 | Pt | 0 | 0 | 0.00000 |
| HETATM | 338 | Pt | 10.26304 | 11.36670 | 24.10191 | Pt | 0 | 0 | 0.00000 |
| HETATM | 339 | Pt | 10.26032 | 19.74371 | 24.09569 | Pt | 0 | 0 | 0.00000 |
| HETATM | 340 | Pt | 17.51428 | 32.30144 | 24.10269 | Pt | 0 | 0 | 0.00000 |
| HETATM | 341 | Pt | 17.51694 | 15.55432 | 24.09872 | Pt | 0 | 0 | 0.00000 |
| HETATM | 342 | Pt | 17.51396 | 23.92781 | 24.10290 | Pt | 0 | 0 | 0.00000 |
| HETATM | 343 | Pt | 3.01108  | 26.72294 | 24.10061 | Pt | 0 | 0 | 0.00000 |
| HETATM | 344 | Pt | 3.01119  | 9.97685  | 24.10282 | Pt | 0 | 0 | 0.00000 |
| HETATM | 345 | Pt | 3.01190  | 18.34851 | 24.10359 | Pt | 0 | 0 | 0.00000 |
| HETATM | 346 | Pt | 10.26324 | 30.91015 | 24.10247 | Pt | 0 | 0 | 0.00000 |
| HETATM | 347 | Pt | 10.26087 | 14.16036 | 24.09535 | Pt | 0 | 0 | 0.00000 |
| HETATM | 348 | Pt | 10.26346 | 22.53545 | 24.10294 | Pt | 0 | 0 | 0.00000 |
| HETATM | 349 | Pt | 17.51338 | 35.09682 | 24.10381 | Pt | 0 | 0 | 0.00000 |
| HETATM | 350 | Pt | 17.51290 | 18.34921 | 24.10330 | Pt | 0 | 0 | 0.00000 |
| HETATM | 351 | Pt | 17.51443 | 26.72305 | 24.10239 | Pt | 0 | 0 | 0.00000 |
| HETATM | 352 | Pt | 5.42389  | 22.53496 | 24.10011 | Pt | 0 | 0 | 0.00000 |
| HETATM | 353 | Pt | 5.42407  | 5.78650  | 24.10066 | Pt | 0 | 0 | 0.00000 |
| HETATM | 354 | Pt | 5.42600  | 14.16301 | 24.10761 | Pt | 0 | 0 | 0.00000 |
| HETATM | 355 | Pt | 12.67644 | 26.72074 | 24.10254 | Pt | 0 | 0 | 0.00000 |
| HETATM | 356 | Pt | 12.67630 | 9.97604  | 24.10789 | Pt | 0 | 0 | 0.00000 |
| HETATM | 357 | Pt | 12.67813 | 18.34663 | 24.10077 | Pt | 0 | 0 | 0.00000 |
| HETATM | 358 | Pt | 19.92794 | 30.90797 | 24.10234 | Pt | 0 | 0 | 0.00000 |
| HETATM | 359 | Pt | 19.92883 | 14.16051 | 24.10112 | Pt | 0 | 0 | 0.00000 |
| HETATM | 360 | Pt | 19.92711 | 22.53472 | 24.10318 | Pt | 0 | 0 | 0.00000 |
| HETATM | 361 | Pt | 5.42657  | 25.32583 | 24.09551 | Pt | 0 | 0 | 0.00000 |
| HETATM | 362 | Pt | 5.42600  | 8.57751  | 24.09601 | Pt | 0 | 0 | 0.00000 |
| HETATM | 363 | Pt | 5.42944  | 16.95091 | 24.10234 | Pt | 0 | 0 | 0.00000 |
| HETATM | 364 | Pt | 12.67893 | 29.51243 | 24.09776 | Pt | 0 | 0 | 0.00000 |
| HETATM | 365 | Pt | 12.67795 | 12.76607 | 24.10142 | Pt | 0 | 0 | 0.00000 |
| HETATM | 366 | Pt | 12.67803 | 21.13588 | 24.10234 | Pt | 0 | 0 | 0.00000 |
| HETATM | 367 | Pt | 19.93004 | 33.69886 | 24.09776 | Pt | 0 | 0 | 0.00000 |
| HETATM | 368 | Pt | 19.93133 | 16.95217 | 24.09601 | Pt | 0 | 0 | 0.00000 |
| HETATM | 369 | Pt | 19.93024 | 25.32566 | 24.09781 | Pt | 0 | 0 | 0.00000 |
| HETATM | 370 | Pt | 5.42439  | 28.11626 | 24.10061 | Pt | 0 | 0 | 0.00000 |
| HETATM | 371 | Pt | 5.42534  | 11.37046 | 24.10330 | Pt | 0 | 0 | 0.00000 |
| HETATM | 372 | Pt | 5.42467  | 19.74177 | 24.10294 | Pt | 0 | 0 | 0.00000 |

|        |     |    |          |          |          |    |   |   |         |
|--------|-----|----|----------|----------|----------|----|---|---|---------|
| HETATM | 373 | Pt | 12.67660 | 32.30430 | 24.10381 | Pt | 0 | 0 | 0.00000 |
| HETATM | 374 | Pt | 12.67900 | 15.55647 | 24.09535 | Pt | 0 | 0 | 0.00000 |
| HETATM | 375 | Pt | 12.67644 | 23.92833 | 24.10359 | Pt | 0 | 0 | 0.00000 |
| HETATM | 376 | Pt | 19.92743 | 36.48978 | 24.10247 | Pt | 0 | 0 | 0.00000 |
| HETATM | 377 | Pt | 19.92687 | 19.74312 | 24.10282 | Pt | 0 | 0 | 0.00000 |
| HETATM | 378 | Pt | 19.92797 | 28.11651 | 24.10239 | Pt | 0 | 0 | 0.00000 |
| HETATM | 379 | Pt | 7.84488  | 23.93271 | 24.10011 | Pt | 0 | 0 | 0.00000 |
| HETATM | 380 | Pt | 7.84490  | 7.18384  | 24.10112 | Pt | 0 | 0 | 0.00000 |
| HETATM | 381 | Pt | 7.84496  | 15.55620 | 24.10077 | Pt | 0 | 0 | 0.00000 |
| HETATM | 382 | Pt | 15.09697 | 28.11881 | 24.10234 | Pt | 0 | 0 | 0.00000 |
| HETATM | 383 | Pt | 15.09502 | 11.37248 | 24.10789 | Pt | 0 | 0 | 0.00000 |
| HETATM | 384 | Pt | 15.09415 | 19.74491 | 24.10761 | Pt | 0 | 0 | 0.00000 |
| HETATM | 385 | Pt | 0.59362  | 19.74472 | 24.10254 | Pt | 0 | 0 | 0.00000 |
| HETATM | 386 | Pt | 0.59401  | 2.99787  | 24.10066 | Pt | 0 | 0 | 0.00000 |
| HETATM | 387 | Pt | 0.59347  | 11.37244 | 24.10318 | Pt | 0 | 0 | 0.00000 |
| HETATM | 388 | Pt | 7.84540  | 26.71868 | 24.10132 | Pt | 0 | 0 | 0.00000 |
| HETATM | 389 | Pt | 7.84377  | 9.96950  | 24.09872 | Pt | 0 | 0 | 0.00000 |
| HETATM | 390 | Pt | 7.84395  | 18.34862 | 24.09569 | Pt | 0 | 0 | 0.00000 |
| HETATM | 391 | Pt | 15.09702 | 30.90583 | 24.10269 | Pt | 0 | 0 | 0.00000 |
| HETATM | 392 | Pt | 15.09730 | 14.15776 | 24.10191 | Pt | 0 | 0 | 0.00000 |
| HETATM | 393 | Pt | 15.09602 | 22.53158 | 24.10415 | Pt | 0 | 0 | 0.00000 |
| HETATM | 394 | Pt | 0.59333  | 22.53142 | 24.10222 | Pt | 0 | 0 | 0.00000 |
| HETATM | 395 | Pt | 0.59343  | 5.78513  | 24.10141 | Pt | 0 | 0 | 0.00000 |
| HETATM | 396 | Pt | 0.59359  | 14.15884 | 24.10290 | Pt | 0 | 0 | 0.00000 |
| HETATM | 397 | Pt | 7.84429  | 29.51169 | 24.09088 | Pt | 0 | 0 | 0.00000 |
| HETATM | 398 | Pt | 7.84488  | 12.76615 | 24.09274 | Pt | 0 | 0 | 0.00000 |
| HETATM | 399 | Pt | 7.84341  | 21.13975 | 24.08919 | Pt | 0 | 0 | 0.00000 |
| HETATM | 400 | Pt | 15.09549 | 33.69969 | 24.09410 | Pt | 0 | 0 | 0.00000 |
| HETATM | 401 | Pt | 15.09442 | 16.95167 | 24.09274 | Pt | 0 | 0 | 0.00000 |
| HETATM | 402 | Pt | 15.09574 | 25.32519 | 24.09231 | Pt | 0 | 0 | 0.00000 |
| HETATM | 403 | Pt | 0.59265  | 25.32496 | 24.09088 | Pt | 0 | 0 | 0.00000 |
| HETATM | 404 | Pt | 0.59186  | 8.57887  | 24.09244 | Pt | 0 | 0 | 0.00000 |
| HETATM | 405 | Pt | 0.59255  | 16.95177 | 24.09231 | Pt | 0 | 0 | 0.00000 |
| HETATM | 406 | Pt | 3.81366  | 22.53048 | 26.39967 | Pt | 0 | 0 | 0.00000 |
| HETATM | 407 | Pt | 3.81279  | 5.78263  | 26.39885 | Pt | 0 | 0 | 0.00000 |
| HETATM | 408 | Pt | 3.81784  | 14.16002 | 26.40462 | Pt | 0 | 0 | 0.00000 |
| HETATM | 409 | Pt | 11.06528 | 26.71615 | 26.40054 | Pt | 0 | 0 | 0.00000 |
| HETATM | 410 | Pt | 11.06340 | 9.97280  | 26.40668 | Pt | 0 | 0 | 0.00000 |
| HETATM | 411 | Pt | 11.05831 | 18.34642 | 26.37286 | Pt | 0 | 0 | 0.00000 |
| HETATM | 412 | Pt | 18.31687 | 30.90422 | 26.40061 | Pt | 0 | 0 | 0.00000 |
| HETATM | 413 | Pt | 18.31996 | 14.15704 | 26.39934 | Pt | 0 | 0 | 0.00000 |
| HETATM | 414 | Pt | 18.31473 | 22.53005 | 26.40182 | Pt | 0 | 0 | 0.00000 |
| HETATM | 415 | Pt | 3.81183  | 25.32558 | 26.37034 | Pt | 0 | 0 | 0.00000 |
| HETATM | 416 | Pt | 3.81071  | 8.57749  | 26.37115 | Pt | 0 | 0 | 0.00000 |
| HETATM | 417 | Pt | 3.81522  | 16.95165 | 26.37554 | Pt | 0 | 0 | 0.00000 |
| HETATM | 418 | Pt | 11.06388 | 29.51162 | 26.37219 | Pt | 0 | 0 | 0.00000 |
| HETATM | 419 | Pt | 11.05879 | 12.76909 | 26.37397 | Pt | 0 | 0 | 0.00000 |
| HETATM | 420 | Pt | 11.06340 | 21.13320 | 26.37756 | Pt | 0 | 0 | 0.00000 |
| HETATM | 421 | Pt | 18.31505 | 33.69908 | 26.37274 | Pt | 0 | 0 | 0.00000 |
| HETATM | 422 | Pt | 18.31917 | 16.95274 | 26.36998 | Pt | 0 | 0 | 0.00000 |
| HETATM | 423 | Pt | 18.31501 | 25.32515 | 26.37246 | Pt | 0 | 0 | 0.00000 |
| HETATM | 424 | Pt | 3.81339  | 2.99902  | 26.39866 | Pt | 0 | 0 | 0.00000 |
| HETATM | 425 | Pt | 3.81450  | 11.37434 | 26.40142 | Pt | 0 | 0 | 0.00000 |
| HETATM | 426 | Pt | 3.81569  | 19.74561 | 26.40152 | Pt | 0 | 0 | 0.00000 |
| HETATM | 427 | Pt | 11.06520 | 7.18638  | 26.40133 | Pt | 0 | 0 | 0.00000 |
| HETATM | 428 | Pt | 11.06581 | 15.55838 | 26.37004 | Pt | 0 | 0 | 0.00000 |
| HETATM | 429 | Pt | 11.06463 | 23.93078 | 26.40152 | Pt | 0 | 0 | 0.00000 |
| HETATM | 430 | Pt | 18.31649 | 11.37291 | 26.40132 | Pt | 0 | 0 | 0.00000 |
| HETATM | 431 | Pt | 18.31495 | 19.74618 | 26.40142 | Pt | 0 | 0 | 0.00000 |
| HETATM | 432 | Pt | 18.31692 | 28.12001 | 26.40059 | Pt | 0 | 0 | 0.00000 |
| HETATM | 433 | Pt | 6.23338  | 23.92840 | 26.36945 | Pt | 0 | 0 | 0.00000 |
| HETATM | 434 | Pt | 6.23302  | 7.17736  | 26.37014 | Pt | 0 | 0 | 0.00000 |
| HETATM | 435 | Pt | 6.24447  | 15.55800 | 26.38799 | Pt | 0 | 0 | 0.00000 |

|        |     |    |          |          |          |    |   |   |         |
|--------|-----|----|----------|----------|----------|----|---|---|---------|
| HETATM | 436 | Pt | 13.48614 | 28.11310 | 26.37222 | Pt | 0 | 0 | 0.00000 |
| HETATM | 437 | Pt | 13.48272 | 11.37217 | 26.38630 | Pt | 0 | 0 | 0.00000 |
| HETATM | 438 | Pt | 13.47681 | 19.73359 | 26.38799 | Pt | 0 | 0 | 0.00000 |
| HETATM | 439 | Pt | 20.73830 | 32.30013 | 26.37222 | Pt | 0 | 0 | 0.00000 |
| HETATM | 440 | Pt | 20.74039 | 15.55319 | 26.37014 | Pt | 0 | 0 | 0.00000 |
| HETATM | 441 | Pt | 20.73757 | 23.92733 | 26.37285 | Pt | 0 | 0 | 0.00000 |
| HETATM | 442 | Pt | 6.23416  | 26.72411 | 26.37034 | Pt | 0 | 0 | 0.00000 |
| HETATM | 443 | Pt | 6.23158  | 9.97397  | 26.36998 | Pt | 0 | 0 | 0.00000 |
| HETATM | 444 | Pt | 6.23909  | 18.34788 | 26.37757 | Pt | 0 | 0 | 0.00000 |
| HETATM | 445 | Pt | 13.48624 | 30.91116 | 26.37274 | Pt | 0 | 0 | 0.00000 |
| HETATM | 446 | Pt | 13.48491 | 14.16982 | 26.37396 | Pt | 0 | 0 | 0.00000 |
| HETATM | 447 | Pt | 13.48450 | 22.53421 | 26.37554 | Pt | 0 | 0 | 0.00000 |
| HETATM | 448 | Pt | 20.73828 | 35.09714 | 26.37219 | Pt | 0 | 0 | 0.00000 |
| HETATM | 449 | Pt | 20.73899 | 18.35103 | 26.37115 | Pt | 0 | 0 | 0.00000 |
| HETATM | 450 | Pt | 20.73829 | 26.72424 | 26.37246 | Pt | 0 | 0 | 0.00000 |
| HETATM | 451 | Pt | 6.24112  | 4.39027  | 26.36807 | Pt | 0 | 0 | 0.00000 |
| HETATM | 452 | Pt | 6.24609  | 12.76706 | 26.37169 | Pt | 0 | 0 | 0.00000 |
| HETATM | 453 | Pt | 6.24112  | 21.14051 | 26.36474 | Pt | 0 | 0 | 0.00000 |
| HETATM | 454 | Pt | 13.49226 | 8.58036  | 26.37356 | Pt | 0 | 0 | 0.00000 |
| HETATM | 455 | Pt | 13.48282 | 16.94651 | 26.37910 | Pt | 0 | 0 | 0.00000 |
| HETATM | 456 | Pt | 13.49277 | 25.32391 | 26.37036 | Pt | 0 | 0 | 0.00000 |
| HETATM | 457 | Pt | 20.74669 | 12.76436 | 26.36836 | Pt | 0 | 0 | 0.00000 |
| HETATM | 458 | Pt | 20.74400 | 21.13904 | 26.37045 | Pt | 0 | 0 | 0.00000 |
| HETATM | 459 | Pt | 20.74545 | 29.51221 | 26.36983 | Pt | 0 | 0 | 0.00000 |
| HETATM | 460 | Pt | 8.65388  | 25.32498 | 26.39967 | Pt | 0 | 0 | 0.00000 |
| HETATM | 461 | Pt | 8.65234  | 8.57543  | 26.39934 | Pt | 0 | 0 | 0.00000 |
| HETATM | 462 | Pt | 8.65505  | 16.95890 | 26.37286 | Pt | 0 | 0 | 0.00000 |
| HETATM | 463 | Pt | 15.90575 | 29.51216 | 26.40061 | Pt | 0 | 0 | 0.00000 |
| HETATM | 464 | Pt | 15.90427 | 12.76768 | 26.40668 | Pt | 0 | 0 | 0.00000 |
| HETATM | 465 | Pt | 15.90082 | 21.13612 | 26.40462 | Pt | 0 | 0 | 0.00000 |
| HETATM | 466 | Pt | 1.40316  | 21.13772 | 26.40054 | Pt | 0 | 0 | 0.00000 |
| HETATM | 467 | Pt | 1.40301  | 4.39134  | 26.39885 | Pt | 0 | 0 | 0.00000 |
| HETATM | 468 | Pt | 1.40371  | 12.76646 | 26.40182 | Pt | 0 | 0 | 0.00000 |
| HETATM | 469 | Pt | 8.64560  | 28.12334 | 26.36891 | Pt | 0 | 0 | 0.00000 |
| HETATM | 470 | Pt | 8.64032  | 11.37057 | 26.35909 | Pt | 0 | 0 | 0.00000 |
| HETATM | 471 | Pt | 8.64583  | 19.74992 | 26.36930 | Pt | 0 | 0 | 0.00000 |
| HETATM | 472 | Pt | 15.89680 | 32.31178 | 26.37052 | Pt | 0 | 0 | 0.00000 |
| HETATM | 473 | Pt | 15.90531 | 15.56501 | 26.35909 | Pt | 0 | 0 | 0.00000 |
| HETATM | 474 | Pt | 15.89596 | 23.93640 | 26.37062 | Pt | 0 | 0 | 0.00000 |
| HETATM | 475 | Pt | 1.39435  | 23.93683 | 26.36891 | Pt | 0 | 0 | 0.00000 |
| HETATM | 476 | Pt | 1.39345  | 7.19048  | 26.36923 | Pt | 0 | 0 | 0.00000 |
| HETATM | 477 | Pt | 1.39516  | 15.56436 | 26.37062 | Pt | 0 | 0 | 0.00000 |
| HETATM | 478 | Pt | 8.64507  | 5.77749  | 26.36836 | Pt | 0 | 0 | 0.00000 |
| HETATM | 479 | Pt | 8.65516  | 14.15925 | 26.37910 | Pt | 0 | 0 | 0.00000 |
| HETATM | 480 | Pt | 8.64390  | 22.52775 | 26.36474 | Pt | 0 | 0 | 0.00000 |
| HETATM | 481 | Pt | 15.89573 | 9.96800  | 26.37356 | Pt | 0 | 0 | 0.00000 |
| HETATM | 482 | Pt | 15.89303 | 18.33672 | 26.37169 | Pt | 0 | 0 | 0.00000 |
| HETATM | 483 | Pt | 15.89698 | 26.71294 | 26.36983 | Pt | 0 | 0 | 0.00000 |
| HETATM | 484 | Pt | 1.39467  | 1.59217  | 26.36806 | Pt | 0 | 0 | 0.00000 |
| HETATM | 485 | Pt | 1.39373  | 9.96715  | 26.37045 | Pt | 0 | 0 | 0.00000 |
| HETATM | 486 | Pt | 1.39513  | 18.33934 | 26.37036 | Pt | 0 | 0 | 0.00000 |
| HETATM | 487 | Pt | 2.21198  | 19.75253 | 28.73850 | Pt | 0 | 0 | 0.00000 |
| HETATM | 488 | Pt | 2.21032  | 3.00527  | 28.73643 | Pt | 0 | 0 | 0.00000 |
| HETATM | 489 | Pt | 2.20875  | 11.38040 | 28.73951 | Pt | 0 | 0 | 0.00000 |
| HETATM | 490 | Pt | 9.45950  | 23.93829 | 28.73772 | Pt | 0 | 0 | 0.00000 |
| HETATM | 491 | Pt | 9.45995  | 7.18680  | 28.73550 | Pt | 0 | 0 | 0.00000 |
| HETATM | 492 | Pt | 9.43762  | 15.56446 | 28.72892 | Pt | 0 | 0 | 0.00000 |
| HETATM | 493 | Pt | 16.71325 | 28.12576 | 28.73822 | Pt | 0 | 0 | 0.00000 |
| HETATM | 494 | Pt | 16.71825 | 11.37897 | 28.74280 | Pt | 0 | 0 | 0.00000 |
| HETATM | 495 | Pt | 16.71434 | 19.75330 | 28.73863 | Pt | 0 | 0 | 0.00000 |
| HETATM | 496 | Pt | 2.21088  | 22.52354 | 28.73726 | Pt | 0 | 0 | 0.00000 |
| HETATM | 497 | Pt | 2.20979  | 5.77654  | 28.73731 | Pt | 0 | 0 | 0.00000 |
| HETATM | 498 | Pt | 2.21248  | 14.15314 | 28.73922 | Pt | 0 | 0 | 0.00000 |



|        |     |    |          |          |          |    |   |   |         |
|--------|-----|----|----------|----------|----------|----|---|---|---------|
| HETATM | 499 | Pt | 9.46127  | 26.70956 | 28.73727 | Pt | 0 | 0 | 0.00000 |
| HETATM | 500 | Pt | 9.45370  | 9.95564  | 28.73962 | Pt | 0 | 0 | 0.00000 |
| HETATM | 501 | Pt | 9.44115  | 18.37238 | 28.63173 | Pt | 0 | 0 | 0.00000 |
| HETATM | 502 | Pt | 16.71347 | 30.89727 | 28.73817 | Pt | 0 | 0 | 0.00000 |
| HETATM | 503 | Pt | 16.72399 | 14.15313 | 28.73962 | Pt | 0 | 0 | 0.00000 |
| HETATM | 504 | Pt | 16.70946 | 22.52297 | 28.73922 | Pt | 0 | 0 | 0.00000 |
| HETATM | 505 | Pt | 2.21515  | 25.32515 | 28.69127 | Pt | 0 | 0 | 0.00000 |
| HETATM | 506 | Pt | 2.21309  | 8.57793  | 28.69226 | Pt | 0 | 0 | 0.00000 |
| HETATM | 507 | Pt | 2.21963  | 16.95232 | 28.69386 | Pt | 0 | 0 | 0.00000 |
| HETATM | 508 | Pt | 9.46645  | 29.50965 | 28.69240 | Pt | 0 | 0 | 0.00000 |
| HETATM | 509 | Pt | 9.44142  | 12.75418 | 28.64715 | Pt | 0 | 0 | 0.00000 |
| HETATM | 510 | Pt | 9.45206  | 21.13503 | 28.67237 | Pt | 0 | 0 | 0.00000 |
| HETATM | 511 | Pt | 16.71839 | 33.69876 | 28.69358 | Pt | 0 | 0 | 0.00000 |
| HETATM | 512 | Pt | 16.73141 | 16.95349 | 28.68952 | Pt | 0 | 0 | 0.00000 |
| HETATM | 513 | Pt | 16.71693 | 25.32399 | 28.69257 | Pt | 0 | 0 | 0.00000 |
| HETATM | 514 | Pt | 4.61176  | 21.13944 | 28.73772 | Pt | 0 | 0 | 0.00000 |
| HETATM | 515 | Pt | 4.60951  | 4.39044  | 28.73643 | Pt | 0 | 0 | 0.00000 |
| HETATM | 516 | Pt | 4.60864  | 12.76408 | 28.73863 | Pt | 0 | 0 | 0.00000 |
| HETATM | 517 | Pt | 11.86048 | 25.32310 | 28.73850 | Pt | 0 | 0 | 0.00000 |
| HETATM | 518 | Pt | 11.85906 | 8.57352  | 28.74279 | Pt | 0 | 0 | 0.00000 |
| HETATM | 519 | Pt | 11.87464 | 16.97148 | 28.72892 | Pt | 0 | 0 | 0.00000 |
| HETATM | 520 | Pt | 19.11378 | 29.51171 | 28.73822 | Pt | 0 | 0 | 0.00000 |
| HETATM | 521 | Pt | 19.11874 | 12.76331 | 28.73551 | Pt | 0 | 0 | 0.00000 |
| HETATM | 522 | Pt | 19.11257 | 21.13983 | 28.73951 | Pt | 0 | 0 | 0.00000 |
| HETATM | 523 | Pt | 4.62952  | 23.94736 | 28.63668 | Pt | 0 | 0 | 0.00000 |
| HETATM | 524 | Pt | 4.62849  | 7.19669  | 28.63672 | Pt | 0 | 0 | 0.00000 |
| HETATM | 525 | Pt | 4.64118  | 15.57627 | 28.64569 | Pt | 0 | 0 | 0.00000 |
| HETATM | 526 | Pt | 11.88250 | 28.13090 | 28.63831 | Pt | 0 | 0 | 0.00000 |
| HETATM | 527 | Pt | 11.87054 | 11.37541 | 28.66224 | Pt | 0 | 0 | 0.00000 |
| HETATM | 528 | Pt | 11.85619 | 19.75488 | 28.68182 | Pt | 0 | 0 | 0.00000 |
| HETATM | 529 | Pt | 19.13496 | 32.31878 | 28.63846 | Pt | 0 | 0 | 0.00000 |
| HETATM | 530 | Pt | 19.14089 | 15.57285 | 28.63623 | Pt | 0 | 0 | 0.00000 |
| HETATM | 531 | Pt | 19.13311 | 23.94595 | 28.63894 | Pt | 0 | 0 | 0.00000 |
| HETATM | 532 | Pt | 4.63031  | 26.70500 | 28.63649 | Pt | 0 | 0 | 0.00000 |
| HETATM | 533 | Pt | 4.62635  | 9.95452  | 28.63784 | Pt | 0 | 0 | 0.00000 |
| HETATM | 534 | Pt | 4.63724  | 18.33423 | 28.64110 | Pt | 0 | 0 | 0.00000 |
| HETATM | 535 | Pt | 11.88264 | 30.88901 | 28.63847 | Pt | 0 | 0 | 0.00000 |
| HETATM | 536 | Pt | 11.87405 | 14.15847 | 28.72870 | Pt | 0 | 0 | 0.00000 |
| HETATM | 537 | Pt | 11.87614 | 22.51361 | 28.64110 | Pt | 0 | 0 | 0.00000 |
| HETATM | 538 | Pt | 19.13604 | 35.07677 | 28.63847 | Pt | 0 | 0 | 0.00000 |
| HETATM | 539 | Pt | 19.13863 | 18.33318 | 28.63784 | Pt | 0 | 0 | 0.00000 |
| HETATM | 540 | Pt | 19.13420 | 26.70444 | 28.63844 | Pt | 0 | 0 | 0.00000 |
| HETATM | 541 | Pt | 7.02994  | 22.54872 | 28.68842 | Pt | 0 | 0 | 0.00000 |
| HETATM | 542 | Pt | 7.03203  | 5.79358  | 28.69130 | Pt | 0 | 0 | 0.00000 |
| HETATM | 543 | Pt | 7.03390  | 14.15556 | 28.70181 | Pt | 0 | 0 | 0.00000 |
| HETATM | 544 | Pt | 14.28436 | 26.72817 | 28.69243 | Pt | 0 | 0 | 0.00000 |
| HETATM | 545 | Pt | 14.28388 | 9.98452  | 28.69829 | Pt | 0 | 0 | 0.00000 |
| HETATM | 546 | Pt | 14.29665 | 18.34871 | 28.70181 | Pt | 0 | 0 | 0.00000 |
| HETATM | 547 | Pt | 21.53857 | 30.91640 | 28.69243 | Pt | 0 | 0 | 0.00000 |
| HETATM | 548 | Pt | 21.53926 | 14.16934 | 28.69130 | Pt | 0 | 0 | 0.00000 |
| HETATM | 549 | Pt | 21.53606 | 22.54430 | 28.69296 | Pt | 0 | 0 | 0.00000 |
| HETATM | 550 | Pt | 7.01889  | 25.32687 | 28.63668 | Pt | 0 | 0 | 0.00000 |
| HETATM | 551 | Pt | 7.01574  | 8.57239  | 28.63623 | Pt | 0 | 0 | 0.00000 |
| HETATM | 552 | Pt | 7.03635  | 16.97214 | 28.68182 | Pt | 0 | 0 | 0.00000 |
| HETATM | 553 | Pt | 14.27166 | 29.51095 | 28.63846 | Pt | 0 | 0 | 0.00000 |
| HETATM | 554 | Pt | 14.28601 | 12.76998 | 28.66224 | Pt | 0 | 0 | 0.00000 |
| HETATM | 555 | Pt | 14.26263 | 21.13122 | 28.64569 | Pt | 0 | 0 | 0.00000 |
| HETATM | 556 | Pt | 21.52470 | 33.69782 | 28.63831 | Pt | 0 | 0 | 0.00000 |
| HETATM | 557 | Pt | 21.52591 | 16.95242 | 28.63672 | Pt | 0 | 0 | 0.00000 |
| HETATM | 558 | Pt | 21.52367 | 25.32614 | 28.63894 | Pt | 0 | 0 | 0.00000 |
| HETATM | 559 | Pt | 7.03287  | 28.10666 | 28.69127 | Pt | 0 | 0 | 0.00000 |
| HETATM | 560 | Pt | 7.02482  | 11.34938 | 28.68952 | Pt | 0 | 0 | 0.00000 |
| HETATM | 561 | Pt | 7.04317  | 19.74425 | 28.67237 | Pt | 0 | 0 | 0.00000 |

|                      |     |    |          |          |          |    |   |   |         |
|----------------------|-----|----|----------|----------|----------|----|---|---|---------|
| HETATM               | 562 | Pt | 14.28485 | 32.29376 | 28.69358 | Pt | 0 | 0 | 0.00000 |
| HETATM               | 563 | Pt | 14.30652 | 15.56305 | 28.64715 | Pt | 0 | 0 | 0.00000 |
| HETATM               | 564 | Pt | 14.28171 | 23.91637 | 28.69386 | Pt | 0 | 0 | 0.00000 |
| HETATM               | 565 | Pt | 21.53869 | 36.47956 | 28.69240 | Pt | 0 | 0 | 0.00000 |
| HETATM               | 566 | Pt | 21.53742 | 19.73484 | 28.69226 | Pt | 0 | 0 | 0.00000 |
| HETATM               | 567 | Pt | 21.53834 | 28.10764 | 28.69257 | Pt | 0 | 0 | 0.00000 |
| HETATM               | 568 | O  | 3.01065  | 21.13974 | 29.85817 | O  | 0 | 0 | 0.00000 |
| HETATM               | 569 | O  | 3.01016  | 4.39025  | 29.85718 | O  | 0 | 0 | 0.00000 |
| HETATM               | 570 | O  | 3.01163  | 12.76603 | 29.85947 | O  | 0 | 0 | 0.00000 |
| HETATM               | 571 | O  | 10.25979 | 25.32504 | 29.85817 | O  | 0 | 0 | 0.00000 |
| HETATM               | 572 | O  | 10.25396 | 8.56740  | 29.85964 | O  | 0 | 0 | 0.00000 |
| HETATM               | 573 | O  | 11.06031 | 15.56792 | 29.83996 | O  | 0 | 0 | 0.00000 |
| HETATM               | 574 | O  | 17.51339 | 29.51177 | 29.85822 | O  | 0 | 0 | 0.00000 |
| HETATM               | 575 | O  | 17.52611 | 12.76598 | 29.85963 | O  | 0 | 0 | 0.00000 |
| HETATM               | 576 | O  | 17.51115 | 21.13733 | 29.85947 | O  | 0 | 0 | 0.00000 |
| UNIT ENERGY kcal     |     |    |          |          |          |    |   |   |         |
| ENERGY -73576.477661 |     |    |          |          |          |    |   |   |         |
| END                  |     |    |          |          |          |    |   |   |         |

XTLGRF 200

DESCRP TS

REMARK Pt111\_0.11ML\_9x9x7\_30.0\_vac fcc-displacement

FIXATOMS 1 162

CRYSTX 25.12092 25.12092 43.67409 90.00000 90.00000 60.00000

FORMAT ATOM (a6,1x,i5,1x,a5,1x,a3,1x,a1,1x,a5,3f10.5,1x,a5,i3,i2,1x,f8.5)

|        |    |    |          |          |          |    |   |   |         |
|--------|----|----|----------|----------|----------|----|---|---|---------|
| HETATM | 1  | Pt | 2.20377  | 19.74305 | 14.98634 | Pt | 0 | 0 | 0.00000 |
| HETATM | 2  | Pt | 2.20377  | 2.99577  | 14.98634 | Pt | 0 | 0 | 0.00000 |
| HETATM | 3  | Pt | 2.20377  | 11.36941 | 14.98634 | Pt | 0 | 0 | 0.00000 |
| HETATM | 4  | Pt | 9.45555  | 23.92987 | 14.98634 | Pt | 0 | 0 | 0.00000 |
| HETATM | 5  | Pt | 9.45555  | 7.18259  | 14.98634 | Pt | 0 | 0 | 0.00000 |
| HETATM | 6  | Pt | 9.45555  | 15.55623 | 14.98634 | Pt | 0 | 0 | 0.00000 |
| HETATM | 7  | Pt | 16.70734 | 28.11669 | 14.98634 | Pt | 0 | 0 | 0.00000 |
| HETATM | 8  | Pt | 16.70734 | 11.36941 | 14.98634 | Pt | 0 | 0 | 0.00000 |
| HETATM | 9  | Pt | 16.70734 | 19.74305 | 14.98634 | Pt | 0 | 0 | 0.00000 |
| HETATM | 10 | Pt | 2.20377  | 22.53426 | 14.98634 | Pt | 0 | 0 | 0.00000 |
| HETATM | 11 | Pt | 2.20377  | 5.78698  | 14.98634 | Pt | 0 | 0 | 0.00000 |
| HETATM | 12 | Pt | 2.20377  | 14.16062 | 14.98634 | Pt | 0 | 0 | 0.00000 |
| HETATM | 13 | Pt | 9.45555  | 26.72108 | 14.98634 | Pt | 0 | 0 | 0.00000 |
| HETATM | 14 | Pt | 9.45555  | 9.97380  | 14.98634 | Pt | 0 | 0 | 0.00000 |
| HETATM | 15 | Pt | 9.45555  | 18.34744 | 14.98634 | Pt | 0 | 0 | 0.00000 |
| HETATM | 16 | Pt | 16.70734 | 30.90790 | 14.98634 | Pt | 0 | 0 | 0.00000 |
| HETATM | 17 | Pt | 16.70734 | 14.16062 | 14.98634 | Pt | 0 | 0 | 0.00000 |
| HETATM | 18 | Pt | 16.70734 | 22.53426 | 14.98634 | Pt | 0 | 0 | 0.00000 |
| HETATM | 19 | Pt | 2.20377  | 25.32547 | 14.98634 | Pt | 0 | 0 | 0.00000 |
| HETATM | 20 | Pt | 2.20377  | 8.57819  | 14.98634 | Pt | 0 | 0 | 0.00000 |
| HETATM | 21 | Pt | 2.20377  | 16.95183 | 14.98634 | Pt | 0 | 0 | 0.00000 |
| HETATM | 22 | Pt | 9.45555  | 29.51229 | 14.98634 | Pt | 0 | 0 | 0.00000 |
| HETATM | 23 | Pt | 9.45555  | 12.76501 | 14.98634 | Pt | 0 | 0 | 0.00000 |
| HETATM | 24 | Pt | 9.45555  | 21.13865 | 14.98634 | Pt | 0 | 0 | 0.00000 |
| HETATM | 25 | Pt | 16.70734 | 33.69911 | 14.98634 | Pt | 0 | 0 | 0.00000 |
| HETATM | 26 | Pt | 16.70734 | 16.95183 | 14.98634 | Pt | 0 | 0 | 0.00000 |
| HETATM | 27 | Pt | 16.70734 | 25.32547 | 14.98634 | Pt | 0 | 0 | 0.00000 |
| HETATM | 28 | Pt | 4.62103  | 21.13866 | 14.98634 | Pt | 0 | 0 | 0.00000 |
| HETATM | 29 | Pt | 4.62103  | 4.39138  | 14.98634 | Pt | 0 | 0 | 0.00000 |
| HETATM | 30 | Pt | 4.62103  | 12.76502 | 14.98634 | Pt | 0 | 0 | 0.00000 |
| HETATM | 31 | Pt | 11.87281 | 25.32548 | 14.98634 | Pt | 0 | 0 | 0.00000 |
| HETATM | 32 | Pt | 11.87281 | 8.57820  | 14.98634 | Pt | 0 | 0 | 0.00000 |
| HETATM | 33 | Pt | 11.87281 | 16.95184 | 14.98634 | Pt | 0 | 0 | 0.00000 |
| HETATM | 34 | Pt | 19.12460 | 29.51230 | 14.98634 | Pt | 0 | 0 | 0.00000 |
| HETATM | 35 | Pt | 19.12460 | 12.76502 | 14.98634 | Pt | 0 | 0 | 0.00000 |
| HETATM | 36 | Pt | 19.12460 | 21.13866 | 14.98634 | Pt | 0 | 0 | 0.00000 |
| HETATM | 37 | Pt | 4.62103  | 23.92987 | 14.98634 | Pt | 0 | 0 | 0.00000 |
| HETATM | 38 | Pt | 4.62103  | 7.18259  | 14.98634 | Pt | 0 | 0 | 0.00000 |

|        |     |    |          |          |          |    |   |   |         |
|--------|-----|----|----------|----------|----------|----|---|---|---------|
| HETATM | 39  | Pt | 4.62103  | 15.55623 | 14.98634 | Pt | 0 | 0 | 0.00000 |
| HETATM | 40  | Pt | 11.87281 | 28.11669 | 14.98634 | Pt | 0 | 0 | 0.00000 |
| HETATM | 41  | Pt | 11.87281 | 11.36941 | 14.98634 | Pt | 0 | 0 | 0.00000 |
| HETATM | 42  | Pt | 11.87281 | 19.74305 | 14.98634 | Pt | 0 | 0 | 0.00000 |
| HETATM | 43  | Pt | 19.12460 | 32.30351 | 14.98634 | Pt | 0 | 0 | 0.00000 |
| HETATM | 44  | Pt | 19.12460 | 15.55623 | 14.98634 | Pt | 0 | 0 | 0.00000 |
| HETATM | 45  | Pt | 19.12460 | 23.92987 | 14.98634 | Pt | 0 | 0 | 0.00000 |
| HETATM | 46  | Pt | 4.62103  | 26.72108 | 14.98634 | Pt | 0 | 0 | 0.00000 |
| HETATM | 47  | Pt | 4.62103  | 9.97380  | 14.98634 | Pt | 0 | 0 | 0.00000 |
| HETATM | 48  | Pt | 4.62103  | 18.34744 | 14.98634 | Pt | 0 | 0 | 0.00000 |
| HETATM | 49  | Pt | 11.87281 | 30.90790 | 14.98634 | Pt | 0 | 0 | 0.00000 |
| HETATM | 50  | Pt | 11.87281 | 14.16062 | 14.98634 | Pt | 0 | 0 | 0.00000 |
| HETATM | 51  | Pt | 11.87281 | 22.53426 | 14.98634 | Pt | 0 | 0 | 0.00000 |
| HETATM | 52  | Pt | 19.12460 | 35.09472 | 14.98634 | Pt | 0 | 0 | 0.00000 |
| HETATM | 53  | Pt | 19.12460 | 18.34744 | 14.98634 | Pt | 0 | 0 | 0.00000 |
| HETATM | 54  | Pt | 19.12460 | 26.72108 | 14.98634 | Pt | 0 | 0 | 0.00000 |
| HETATM | 55  | Pt | 7.03829  | 22.53426 | 14.98634 | Pt | 0 | 0 | 0.00000 |
| HETATM | 56  | Pt | 7.03829  | 5.78698  | 14.98634 | Pt | 0 | 0 | 0.00000 |
| HETATM | 57  | Pt | 7.03829  | 14.16062 | 14.98634 | Pt | 0 | 0 | 0.00000 |
| HETATM | 58  | Pt | 14.29007 | 26.72108 | 14.98634 | Pt | 0 | 0 | 0.00000 |
| HETATM | 59  | Pt | 14.29007 | 9.97380  | 14.98634 | Pt | 0 | 0 | 0.00000 |
| HETATM | 60  | Pt | 14.29007 | 18.34744 | 14.98634 | Pt | 0 | 0 | 0.00000 |
| HETATM | 61  | Pt | 21.54186 | 30.90790 | 14.98634 | Pt | 0 | 0 | 0.00000 |
| HETATM | 62  | Pt | 21.54186 | 14.16062 | 14.98634 | Pt | 0 | 0 | 0.00000 |
| HETATM | 63  | Pt | 21.54186 | 22.53426 | 14.98634 | Pt | 0 | 0 | 0.00000 |
| HETATM | 64  | Pt | 7.03829  | 25.32547 | 14.98634 | Pt | 0 | 0 | 0.00000 |
| HETATM | 65  | Pt | 7.03829  | 8.57819  | 14.98634 | Pt | 0 | 0 | 0.00000 |
| HETATM | 66  | Pt | 7.03829  | 16.95183 | 14.98634 | Pt | 0 | 0 | 0.00000 |
| HETATM | 67  | Pt | 14.29007 | 29.51229 | 14.98634 | Pt | 0 | 0 | 0.00000 |
| HETATM | 68  | Pt | 14.29007 | 12.76501 | 14.98634 | Pt | 0 | 0 | 0.00000 |
| HETATM | 69  | Pt | 14.29007 | 21.13865 | 14.98634 | Pt | 0 | 0 | 0.00000 |
| HETATM | 70  | Pt | 21.54186 | 33.69911 | 14.98634 | Pt | 0 | 0 | 0.00000 |
| HETATM | 71  | Pt | 21.54186 | 16.95183 | 14.98634 | Pt | 0 | 0 | 0.00000 |
| HETATM | 72  | Pt | 21.54186 | 25.32547 | 14.98634 | Pt | 0 | 0 | 0.00000 |
| HETATM | 73  | Pt | 7.03829  | 28.11669 | 14.98634 | Pt | 0 | 0 | 0.00000 |
| HETATM | 74  | Pt | 7.03829  | 11.36941 | 14.98634 | Pt | 0 | 0 | 0.00000 |
| HETATM | 75  | Pt | 7.03829  | 19.74305 | 14.98634 | Pt | 0 | 0 | 0.00000 |
| HETATM | 76  | Pt | 14.29007 | 32.30351 | 14.98634 | Pt | 0 | 0 | 0.00000 |
| HETATM | 77  | Pt | 14.29007 | 15.55623 | 14.98634 | Pt | 0 | 0 | 0.00000 |
| HETATM | 78  | Pt | 14.29007 | 23.92987 | 14.98634 | Pt | 0 | 0 | 0.00000 |
| HETATM | 79  | Pt | 21.54186 | 36.49033 | 14.98634 | Pt | 0 | 0 | 0.00000 |
| HETATM | 80  | Pt | 21.54186 | 19.74305 | 14.98634 | Pt | 0 | 0 | 0.00000 |
| HETATM | 81  | Pt | 21.54186 | 28.11669 | 14.98634 | Pt | 0 | 0 | 0.00000 |
| HETATM | 82  | Pt | 3.00952  | 21.13866 | 17.26536 | Pt | 0 | 0 | 0.00000 |
| HETATM | 83  | Pt | 3.00952  | 4.39138  | 17.26536 | Pt | 0 | 0 | 0.00000 |
| HETATM | 84  | Pt | 3.00952  | 12.76502 | 17.26536 | Pt | 0 | 0 | 0.00000 |
| HETATM | 85  | Pt | 10.26130 | 25.32548 | 17.26536 | Pt | 0 | 0 | 0.00000 |
| HETATM | 86  | Pt | 10.26130 | 8.57820  | 17.26536 | Pt | 0 | 0 | 0.00000 |
| HETATM | 87  | Pt | 10.26130 | 16.95184 | 17.26536 | Pt | 0 | 0 | 0.00000 |
| HETATM | 88  | Pt | 17.51309 | 29.51230 | 17.26536 | Pt | 0 | 0 | 0.00000 |
| HETATM | 89  | Pt | 17.51309 | 12.76502 | 17.26536 | Pt | 0 | 0 | 0.00000 |
| HETATM | 90  | Pt | 17.51309 | 21.13866 | 17.26536 | Pt | 0 | 0 | 0.00000 |
| HETATM | 91  | Pt | 3.00952  | 23.92987 | 17.26536 | Pt | 0 | 0 | 0.00000 |
| HETATM | 92  | Pt | 3.00952  | 7.18259  | 17.26536 | Pt | 0 | 0 | 0.00000 |
| HETATM | 93  | Pt | 3.00952  | 15.55623 | 17.26536 | Pt | 0 | 0 | 0.00000 |
| HETATM | 94  | Pt | 10.26130 | 28.11669 | 17.26536 | Pt | 0 | 0 | 0.00000 |
| HETATM | 95  | Pt | 10.26130 | 11.36941 | 17.26536 | Pt | 0 | 0 | 0.00000 |
| HETATM | 96  | Pt | 10.26130 | 19.74305 | 17.26536 | Pt | 0 | 0 | 0.00000 |
| HETATM | 97  | Pt | 17.51309 | 32.30351 | 17.26536 | Pt | 0 | 0 | 0.00000 |
| HETATM | 98  | Pt | 17.51309 | 15.55623 | 17.26536 | Pt | 0 | 0 | 0.00000 |
| HETATM | 99  | Pt | 17.51309 | 23.92987 | 17.26536 | Pt | 0 | 0 | 0.00000 |
| HETATM | 100 | Pt | 3.00952  | 26.72108 | 17.26536 | Pt | 0 | 0 | 0.00000 |
| HETATM | 101 | Pt | 3.00952  | 9.97380  | 17.26536 | Pt | 0 | 0 | 0.00000 |

|        |     |    |          |          |          |    |   |   |         |
|--------|-----|----|----------|----------|----------|----|---|---|---------|
| HETATM | 102 | Pt | 3.00952  | 18.34744 | 17.26536 | Pt | 0 | 0 | 0.00000 |
| HETATM | 103 | Pt | 10.26130 | 30.90790 | 17.26536 | Pt | 0 | 0 | 0.00000 |
| HETATM | 104 | Pt | 10.26130 | 14.16062 | 17.26536 | Pt | 0 | 0 | 0.00000 |
| HETATM | 105 | Pt | 10.26130 | 22.53426 | 17.26536 | Pt | 0 | 0 | 0.00000 |
| HETATM | 106 | Pt | 17.51309 | 35.09472 | 17.26536 | Pt | 0 | 0 | 0.00000 |
| HETATM | 107 | Pt | 17.51309 | 18.34744 | 17.26536 | Pt | 0 | 0 | 0.00000 |
| HETATM | 108 | Pt | 17.51309 | 26.72108 | 17.26536 | Pt | 0 | 0 | 0.00000 |
| HETATM | 109 | Pt | 5.42678  | 22.53426 | 17.26536 | Pt | 0 | 0 | 0.00000 |
| HETATM | 110 | Pt | 5.42678  | 5.78698  | 17.26536 | Pt | 0 | 0 | 0.00000 |
| HETATM | 111 | Pt | 5.42678  | 14.16062 | 17.26536 | Pt | 0 | 0 | 0.00000 |
| HETATM | 112 | Pt | 12.67856 | 26.72108 | 17.26536 | Pt | 0 | 0 | 0.00000 |
| HETATM | 113 | Pt | 12.67856 | 9.97380  | 17.26536 | Pt | 0 | 0 | 0.00000 |
| HETATM | 114 | Pt | 12.67856 | 18.34744 | 17.26536 | Pt | 0 | 0 | 0.00000 |
| HETATM | 115 | Pt | 19.93035 | 30.90790 | 17.26536 | Pt | 0 | 0 | 0.00000 |
| HETATM | 116 | Pt | 19.93035 | 14.16062 | 17.26536 | Pt | 0 | 0 | 0.00000 |
| HETATM | 117 | Pt | 19.93035 | 22.53426 | 17.26536 | Pt | 0 | 0 | 0.00000 |
| HETATM | 118 | Pt | 5.42678  | 25.32547 | 17.26536 | Pt | 0 | 0 | 0.00000 |
| HETATM | 119 | Pt | 5.42678  | 8.57819  | 17.26536 | Pt | 0 | 0 | 0.00000 |
| HETATM | 120 | Pt | 5.42678  | 16.95183 | 17.26536 | Pt | 0 | 0 | 0.00000 |
| HETATM | 121 | Pt | 12.67856 | 29.51229 | 17.26536 | Pt | 0 | 0 | 0.00000 |
| HETATM | 122 | Pt | 12.67856 | 12.76501 | 17.26536 | Pt | 0 | 0 | 0.00000 |
| HETATM | 123 | Pt | 12.67856 | 21.13865 | 17.26536 | Pt | 0 | 0 | 0.00000 |
| HETATM | 124 | Pt | 19.93035 | 33.69911 | 17.26536 | Pt | 0 | 0 | 0.00000 |
| HETATM | 125 | Pt | 19.93035 | 16.95183 | 17.26536 | Pt | 0 | 0 | 0.00000 |
| HETATM | 126 | Pt | 19.93035 | 25.32547 | 17.26536 | Pt | 0 | 0 | 0.00000 |
| HETATM | 127 | Pt | 5.42678  | 28.11669 | 17.26536 | Pt | 0 | 0 | 0.00000 |
| HETATM | 128 | Pt | 5.42678  | 11.36941 | 17.26536 | Pt | 0 | 0 | 0.00000 |
| HETATM | 129 | Pt | 5.42678  | 19.74305 | 17.26536 | Pt | 0 | 0 | 0.00000 |
| HETATM | 130 | Pt | 12.67856 | 32.30351 | 17.26536 | Pt | 0 | 0 | 0.00000 |
| HETATM | 131 | Pt | 12.67856 | 15.55623 | 17.26536 | Pt | 0 | 0 | 0.00000 |
| HETATM | 132 | Pt | 12.67856 | 23.92987 | 17.26536 | Pt | 0 | 0 | 0.00000 |
| HETATM | 133 | Pt | 19.93035 | 36.49033 | 17.26536 | Pt | 0 | 0 | 0.00000 |
| HETATM | 134 | Pt | 19.93035 | 19.74305 | 17.26536 | Pt | 0 | 0 | 0.00000 |
| HETATM | 135 | Pt | 19.93035 | 28.11669 | 17.26536 | Pt | 0 | 0 | 0.00000 |
| HETATM | 136 | Pt | 7.84404  | 23.92987 | 17.26536 | Pt | 0 | 0 | 0.00000 |
| HETATM | 137 | Pt | 7.84404  | 7.18259  | 17.26536 | Pt | 0 | 0 | 0.00000 |
| HETATM | 138 | Pt | 7.84404  | 15.55623 | 17.26536 | Pt | 0 | 0 | 0.00000 |
| HETATM | 139 | Pt | 15.09582 | 28.11669 | 17.26536 | Pt | 0 | 0 | 0.00000 |
| HETATM | 140 | Pt | 15.09582 | 11.36941 | 17.26536 | Pt | 0 | 0 | 0.00000 |
| HETATM | 141 | Pt | 15.09582 | 19.74305 | 17.26536 | Pt | 0 | 0 | 0.00000 |
| HETATM | 142 | Pt | 0.59226  | 19.74305 | 17.26536 | Pt | 0 | 0 | 0.00000 |
| HETATM | 143 | Pt | 0.59226  | 2.99577  | 17.26536 | Pt | 0 | 0 | 0.00000 |
| HETATM | 144 | Pt | 0.59226  | 11.36941 | 17.26536 | Pt | 0 | 0 | 0.00000 |
| HETATM | 145 | Pt | 7.84404  | 26.72108 | 17.26536 | Pt | 0 | 0 | 0.00000 |
| HETATM | 146 | Pt | 7.84404  | 9.97380  | 17.26536 | Pt | 0 | 0 | 0.00000 |
| HETATM | 147 | Pt | 7.84404  | 18.34744 | 17.26536 | Pt | 0 | 0 | 0.00000 |
| HETATM | 148 | Pt | 15.09582 | 30.90790 | 17.26536 | Pt | 0 | 0 | 0.00000 |
| HETATM | 149 | Pt | 15.09582 | 14.16062 | 17.26536 | Pt | 0 | 0 | 0.00000 |
| HETATM | 150 | Pt | 15.09582 | 22.53426 | 17.26536 | Pt | 0 | 0 | 0.00000 |
| HETATM | 151 | Pt | 0.59226  | 22.53426 | 17.26536 | Pt | 0 | 0 | 0.00000 |
| HETATM | 152 | Pt | 0.59226  | 5.78698  | 17.26536 | Pt | 0 | 0 | 0.00000 |
| HETATM | 153 | Pt | 0.59226  | 14.16062 | 17.26536 | Pt | 0 | 0 | 0.00000 |
| HETATM | 154 | Pt | 7.84404  | 29.51229 | 17.26536 | Pt | 0 | 0 | 0.00000 |
| HETATM | 155 | Pt | 7.84404  | 12.76501 | 17.26536 | Pt | 0 | 0 | 0.00000 |
| HETATM | 156 | Pt | 7.84404  | 21.13865 | 17.26536 | Pt | 0 | 0 | 0.00000 |
| HETATM | 157 | Pt | 15.09582 | 33.69911 | 17.26536 | Pt | 0 | 0 | 0.00000 |
| HETATM | 158 | Pt | 15.09582 | 16.95183 | 17.26536 | Pt | 0 | 0 | 0.00000 |
| HETATM | 159 | Pt | 15.09582 | 25.32547 | 17.26536 | Pt | 0 | 0 | 0.00000 |
| HETATM | 160 | Pt | 0.59226  | 25.32547 | 17.26536 | Pt | 0 | 0 | 0.00000 |
| HETATM | 161 | Pt | 0.59226  | 8.57819  | 17.26536 | Pt | 0 | 0 | 0.00000 |
| HETATM | 162 | Pt | 0.59226  | 16.95183 | 17.26536 | Pt | 0 | 0 | 0.00000 |
| HETATM | 163 | Pt | 3.81492  | 22.53398 | 19.54432 | Pt | 0 | 0 | 0.00000 |
| HETATM | 164 | Pt | 3.81508  | 5.78680  | 19.54417 | Pt | 0 | 0 | 0.00000 |

|        |     |    |          |          |          |    |   |   |         |
|--------|-----|----|----------|----------|----------|----|---|---|---------|
| HETATM | 165 | Pt | 3.81513  | 14.16045 | 19.54501 | Pt | 0 | 0 | 0.00000 |
| HETATM | 166 | Pt | 11.06714 | 26.72081 | 19.54457 | Pt | 0 | 0 | 0.00000 |
| HETATM | 167 | Pt | 11.06711 | 9.97365  | 19.54509 | Pt | 0 | 0 | 0.00000 |
| HETATM | 168 | Pt | 11.06725 | 18.34745 | 19.54258 | Pt | 0 | 0 | 0.00000 |
| HETATM | 169 | Pt | 18.31868 | 30.90765 | 19.54446 | Pt | 0 | 0 | 0.00000 |
| HETATM | 170 | Pt | 18.31880 | 14.16022 | 19.54428 | Pt | 0 | 0 | 0.00000 |
| HETATM | 171 | Pt | 18.31861 | 22.53411 | 19.54476 | Pt | 0 | 0 | 0.00000 |
| HETATM | 172 | Pt | 3.81521  | 25.32552 | 19.54299 | Pt | 0 | 0 | 0.00000 |
| HETATM | 173 | Pt | 3.81528  | 8.57837  | 19.54342 | Pt | 0 | 0 | 0.00000 |
| HETATM | 174 | Pt | 3.81546  | 16.95167 | 19.54378 | Pt | 0 | 0 | 0.00000 |
| HETATM | 175 | Pt | 11.06738 | 29.51239 | 19.54346 | Pt | 0 | 0 | 0.00000 |
| HETATM | 176 | Pt | 11.06703 | 12.76471 | 19.54393 | Pt | 0 | 0 | 0.00000 |
| HETATM | 177 | Pt | 11.06723 | 21.13884 | 19.54299 | Pt | 0 | 0 | 0.00000 |
| HETATM | 178 | Pt | 18.31874 | 33.69907 | 19.54347 | Pt | 0 | 0 | 0.00000 |
| HETATM | 179 | Pt | 18.31914 | 16.95190 | 19.54324 | Pt | 0 | 0 | 0.00000 |
| HETATM | 180 | Pt | 18.31890 | 25.32549 | 19.54346 | Pt | 0 | 0 | 0.00000 |
| HETATM | 181 | Pt | 3.81513  | 2.99604  | 19.54407 | Pt | 0 | 0 | 0.00000 |
| HETATM | 182 | Pt | 3.81502  | 11.36980 | 19.54485 | Pt | 0 | 0 | 0.00000 |
| HETATM | 183 | Pt | 3.81519  | 19.74301 | 19.54466 | Pt | 0 | 0 | 0.00000 |
| HETATM | 184 | Pt | 11.06716 | 7.18304  | 19.54489 | Pt | 0 | 0 | 0.00000 |
| HETATM | 185 | Pt | 11.06704 | 15.55595 | 19.54338 | Pt | 0 | 0 | 0.00000 |
| HETATM | 186 | Pt | 11.06712 | 23.93000 | 19.54466 | Pt | 0 | 0 | 0.00000 |
| HETATM | 187 | Pt | 18.31832 | 11.36956 | 19.54483 | Pt | 0 | 0 | 0.00000 |
| HETATM | 188 | Pt | 18.31867 | 19.74347 | 19.54482 | Pt | 0 | 0 | 0.00000 |
| HETATM | 189 | Pt | 18.31871 | 28.11691 | 19.54447 | Pt | 0 | 0 | 0.00000 |
| HETATM | 190 | Pt | 6.23229  | 23.93026 | 19.54288 | Pt | 0 | 0 | 0.00000 |
| HETATM | 191 | Pt | 6.23245  | 7.18256  | 19.54302 | Pt | 0 | 0 | 0.00000 |
| HETATM | 192 | Pt | 6.23232  | 15.55593 | 19.54354 | Pt | 0 | 0 | 0.00000 |
| HETATM | 193 | Pt | 13.48440 | 28.11676 | 19.54340 | Pt | 0 | 0 | 0.00000 |
| HETATM | 194 | Pt | 13.48416 | 11.36947 | 19.54420 | Pt | 0 | 0 | 0.00000 |
| HETATM | 195 | Pt | 13.48466 | 19.74318 | 19.54333 | Pt | 0 | 0 | 0.00000 |
| HETATM | 196 | Pt | 20.73598 | 32.30349 | 19.54335 | Pt | 0 | 0 | 0.00000 |
| HETATM | 197 | Pt | 20.73622 | 15.55627 | 19.54299 | Pt | 0 | 0 | 0.00000 |
| HETATM | 198 | Pt | 20.73600 | 23.93006 | 19.54358 | Pt | 0 | 0 | 0.00000 |
| HETATM | 199 | Pt | 6.23251  | 26.72117 | 19.54299 | Pt | 0 | 0 | 0.00000 |
| HETATM | 200 | Pt | 6.23240  | 9.97373  | 19.54338 | Pt | 0 | 0 | 0.00000 |
| HETATM | 201 | Pt | 6.23241  | 18.34718 | 19.54315 | Pt | 0 | 0 | 0.00000 |
| HETATM | 202 | Pt | 13.48440 | 30.90794 | 19.54351 | Pt | 0 | 0 | 0.00000 |
| HETATM | 203 | Pt | 13.48426 | 14.16037 | 19.54366 | Pt | 0 | 0 | 0.00000 |
| HETATM | 204 | Pt | 13.48437 | 22.53404 | 19.54380 | Pt | 0 | 0 | 0.00000 |
| HETATM | 205 | Pt | 20.73582 | 35.09451 | 19.54341 | Pt | 0 | 0 | 0.00000 |
| HETATM | 206 | Pt | 20.73603 | 18.34754 | 19.54338 | Pt | 0 | 0 | 0.00000 |
| HETATM | 207 | Pt | 20.73606 | 26.72104 | 19.54346 | Pt | 0 | 0 | 0.00000 |
| HETATM | 208 | Pt | 6.23233  | 4.39140  | 19.54411 | Pt | 0 | 0 | 0.00000 |
| HETATM | 209 | Pt | 6.23190  | 12.76471 | 19.54457 | Pt | 0 | 0 | 0.00000 |
| HETATM | 210 | Pt | 6.23184  | 21.13906 | 19.54368 | Pt | 0 | 0 | 0.00000 |
| HETATM | 211 | Pt | 13.48407 | 8.57836  | 19.54499 | Pt | 0 | 0 | 0.00000 |
| HETATM | 212 | Pt | 13.48493 | 16.95187 | 19.54323 | Pt | 0 | 0 | 0.00000 |
| HETATM | 213 | Pt | 13.48412 | 25.32538 | 19.54450 | Pt | 0 | 0 | 0.00000 |
| HETATM | 214 | Pt | 20.73563 | 12.76485 | 19.54435 | Pt | 0 | 0 | 0.00000 |
| HETATM | 215 | Pt | 20.73568 | 21.13885 | 19.54466 | Pt | 0 | 0 | 0.00000 |
| HETATM | 216 | Pt | 20.73581 | 29.51227 | 19.54439 | Pt | 0 | 0 | 0.00000 |
| HETATM | 217 | Pt | 8.65019  | 25.32566 | 19.54431 | Pt | 0 | 0 | 0.00000 |
| HETATM | 218 | Pt | 8.65022  | 8.57816  | 19.54448 | Pt | 0 | 0 | 0.00000 |
| HETATM | 219 | Pt | 8.64979  | 16.95142 | 19.54302 | Pt | 0 | 0 | 0.00000 |
| HETATM | 220 | Pt | 15.90188 | 29.51230 | 19.54448 | Pt | 0 | 0 | 0.00000 |
| HETATM | 221 | Pt | 15.90152 | 12.76489 | 19.54497 | Pt | 0 | 0 | 0.00000 |
| HETATM | 222 | Pt | 15.90182 | 21.13868 | 19.54500 | Pt | 0 | 0 | 0.00000 |
| HETATM | 223 | Pt | 1.39821  | 21.13845 | 19.54452 | Pt | 0 | 0 | 0.00000 |
| HETATM | 224 | Pt | 1.39829  | 4.39145  | 19.54415 | Pt | 0 | 0 | 0.00000 |
| HETATM | 225 | Pt | 1.39826  | 12.76515 | 19.54476 | Pt | 0 | 0 | 0.00000 |
| HETATM | 226 | Pt | 8.65016  | 28.11651 | 19.54430 | Pt | 0 | 0 | 0.00000 |
| HETATM | 227 | Pt | 8.64983  | 11.36881 | 19.54456 | Pt | 0 | 0 | 0.00000 |

|        |     |    |          |          |          |    |   |   |         |
|--------|-----|----|----------|----------|----------|----|---|---|---------|
| HETATM | 228 | Pt | 8.64957  | 19.74339 | 19.54268 | Pt | 0 | 0 | 0.00000 |
| HETATM | 229 | Pt | 15.90170 | 32.30328 | 19.54452 | Pt | 0 | 0 | 0.00000 |
| HETATM | 230 | Pt | 15.90220 | 15.55590 | 19.54407 | Pt | 0 | 0 | 0.00000 |
| HETATM | 231 | Pt | 15.90172 | 23.92958 | 19.54457 | Pt | 0 | 0 | 0.00000 |
| HETATM | 232 | Pt | 1.39798  | 23.92945 | 19.54428 | Pt | 0 | 0 | 0.00000 |
| HETATM | 233 | Pt | 1.39806  | 7.18254  | 19.54442 | Pt | 0 | 0 | 0.00000 |
| HETATM | 234 | Pt | 1.39819  | 15.55597 | 19.54454 | Pt | 0 | 0 | 0.00000 |
| HETATM | 235 | Pt | 8.65017  | 5.78735  | 19.54442 | Pt | 0 | 0 | 0.00000 |
| HETATM | 236 | Pt | 8.64952  | 14.16000 | 19.54392 | Pt | 0 | 0 | 0.00000 |
| HETATM | 237 | Pt | 8.64973  | 22.53507 | 19.54368 | Pt | 0 | 0 | 0.00000 |
| HETATM | 238 | Pt | 15.90149 | 9.97410  | 19.54496 | Pt | 0 | 0 | 0.00000 |
| HETATM | 239 | Pt | 15.90226 | 18.34783 | 19.54436 | Pt | 0 | 0 | 0.00000 |
| HETATM | 240 | Pt | 15.90176 | 26.72131 | 19.54441 | Pt | 0 | 0 | 0.00000 |
| HETATM | 241 | Pt | 1.39812  | 1.60034  | 19.54407 | Pt | 0 | 0 | 0.00000 |
| HETATM | 242 | Pt | 1.39806  | 9.97428  | 19.54465 | Pt | 0 | 0 | 0.00000 |
| HETATM | 243 | Pt | 1.39819  | 18.34758 | 19.54444 | Pt | 0 | 0 | 0.00000 |
| HETATM | 244 | Pt | 2.20434  | 19.74347 | 21.82506 | Pt | 0 | 0 | 0.00000 |
| HETATM | 245 | Pt | 2.20425  | 2.99642  | 21.82412 | Pt | 0 | 0 | 0.00000 |
| HETATM | 246 | Pt | 2.20421  | 11.37065 | 21.82556 | Pt | 0 | 0 | 0.00000 |
| HETATM | 247 | Pt | 9.45622  | 23.93076 | 21.82460 | Pt | 0 | 0 | 0.00000 |
| HETATM | 248 | Pt | 9.45626  | 7.18362  | 21.82529 | Pt | 0 | 0 | 0.00000 |
| HETATM | 249 | Pt | 9.45533  | 15.55518 | 21.82162 | Pt | 0 | 0 | 0.00000 |
| HETATM | 250 | Pt | 16.70781 | 28.11744 | 21.82488 | Pt | 0 | 0 | 0.00000 |
| HETATM | 251 | Pt | 16.70701 | 11.37024 | 21.82624 | Pt | 0 | 0 | 0.00000 |
| HETATM | 252 | Pt | 16.70740 | 19.74402 | 21.82600 | Pt | 0 | 0 | 0.00000 |
| HETATM | 253 | Pt | 2.20409  | 22.53321 | 21.82477 | Pt | 0 | 0 | 0.00000 |
| HETATM | 254 | Pt | 2.20411  | 5.78628  | 21.82436 | Pt | 0 | 0 | 0.00000 |
| HETATM | 255 | Pt | 2.20427  | 14.16019 | 21.82555 | Pt | 0 | 0 | 0.00000 |
| HETATM | 256 | Pt | 9.45630  | 26.72022 | 21.82481 | Pt | 0 | 0 | 0.00000 |
| HETATM | 257 | Pt | 9.45639  | 9.97299  | 21.82528 | Pt | 0 | 0 | 0.00000 |
| HETATM | 258 | Pt | 9.45547  | 18.34759 | 21.81909 | Pt | 0 | 0 | 0.00000 |
| HETATM | 259 | Pt | 16.70780 | 30.90713 | 21.82491 | Pt | 0 | 0 | 0.00000 |
| HETATM | 260 | Pt | 16.70809 | 14.15951 | 21.82450 | Pt | 0 | 0 | 0.00000 |
| HETATM | 261 | Pt | 16.70748 | 22.53356 | 21.82555 | Pt | 0 | 0 | 0.00000 |
| HETATM | 262 | Pt | 2.20492  | 25.32525 | 21.82128 | Pt | 0 | 0 | 0.00000 |
| HETATM | 263 | Pt | 2.20485  | 8.57856  | 21.82203 | Pt | 0 | 0 | 0.00000 |
| HETATM | 264 | Pt | 2.20510  | 16.95181 | 21.82214 | Pt | 0 | 0 | 0.00000 |
| HETATM | 265 | Pt | 9.45712  | 29.51233 | 21.82175 | Pt | 0 | 0 | 0.00000 |
| HETATM | 266 | Pt | 9.45636  | 12.76412 | 21.82245 | Pt | 0 | 0 | 0.00000 |
| HETATM | 267 | Pt | 9.45605  | 21.13983 | 21.81963 | Pt | 0 | 0 | 0.00000 |
| HETATM | 268 | Pt | 16.70832 | 33.69913 | 21.82230 | Pt | 0 | 0 | 0.00000 |
| HETATM | 269 | Pt | 16.70871 | 16.95180 | 21.82178 | Pt | 0 | 0 | 0.00000 |
| HETATM | 270 | Pt | 16.70851 | 25.32549 | 21.82199 | Pt | 0 | 0 | 0.00000 |
| HETATM | 271 | Pt | 4.61989  | 21.13849 | 21.82465 | Pt | 0 | 0 | 0.00000 |
| HETATM | 272 | Pt | 4.62016  | 4.39127  | 21.82416 | Pt | 0 | 0 | 0.00000 |
| HETATM | 273 | Pt | 4.62010  | 12.76551 | 21.82610 | Pt | 0 | 0 | 0.00000 |
| HETATM | 274 | Pt | 11.87221 | 25.32515 | 21.82518 | Pt | 0 | 0 | 0.00000 |
| HETATM | 275 | Pt | 11.87224 | 8.57870  | 21.82636 | Pt | 0 | 0 | 0.00000 |
| HETATM | 276 | Pt | 11.87346 | 16.95193 | 21.81997 | Pt | 0 | 0 | 0.00000 |
| HETATM | 277 | Pt | 19.12373 | 29.51229 | 21.82485 | Pt | 0 | 0 | 0.00000 |
| HETATM | 278 | Pt | 19.12341 | 12.76480 | 21.82511 | Pt | 0 | 0 | 0.00000 |
| HETATM | 279 | Pt | 19.12329 | 21.13887 | 21.82556 | Pt | 0 | 0 | 0.00000 |
| HETATM | 280 | Pt | 4.62067  | 23.92976 | 21.82085 | Pt | 0 | 0 | 0.00000 |
| HETATM | 281 | Pt | 4.62072  | 7.18228  | 21.82111 | Pt | 0 | 0 | 0.00000 |
| HETATM | 282 | Pt | 4.62120  | 15.55617 | 21.82302 | Pt | 0 | 0 | 0.00000 |
| HETATM | 283 | Pt | 11.87298 | 28.11645 | 21.82171 | Pt | 0 | 0 | 0.00000 |
| HETATM | 284 | Pt | 11.87289 | 11.36939 | 21.82360 | Pt | 0 | 0 | 0.00000 |
| HETATM | 285 | Pt | 11.87297 | 19.74287 | 21.82036 | Pt | 0 | 0 | 0.00000 |
| HETATM | 286 | Pt | 19.12438 | 32.30325 | 21.82162 | Pt | 0 | 0 | 0.00000 |
| HETATM | 287 | Pt | 19.12501 | 15.55595 | 21.82073 | Pt | 0 | 0 | 0.00000 |
| HETATM | 288 | Pt | 19.12431 | 23.92982 | 21.82198 | Pt | 0 | 0 | 0.00000 |
| HETATM | 289 | Pt | 4.62088  | 26.72128 | 21.82080 | Pt | 0 | 0 | 0.00000 |
| HETATM | 290 | Pt | 4.62100  | 9.97434  | 21.82189 | Pt | 0 | 0 | 0.00000 |

|        |     |    |          |          |          |    |   |   |         |
|--------|-----|----|----------|----------|----------|----|---|---|---------|
| HETATM | 291 | Pt | 4.62144  | 18.34713 | 21.82245 | Pt | 0 | 0 | 0.00000 |
| HETATM | 292 | Pt | 11.87303 | 30.90834 | 21.82196 | Pt | 0 | 0 | 0.00000 |
| HETATM | 293 | Pt | 11.87232 | 14.16041 | 21.82217 | Pt | 0 | 0 | 0.00000 |
| HETATM | 294 | Pt | 11.87290 | 22.53387 | 21.82240 | Pt | 0 | 0 | 0.00000 |
| HETATM | 295 | Pt | 19.12405 | 35.09479 | 21.82186 | Pt | 0 | 0 | 0.00000 |
| HETATM | 296 | Pt | 19.12423 | 18.34776 | 21.82177 | Pt | 0 | 0 | 0.00000 |
| HETATM | 297 | Pt | 19.12446 | 26.72132 | 21.82173 | Pt | 0 | 0 | 0.00000 |
| HETATM | 298 | Pt | 7.03730  | 22.53590 | 21.82075 | Pt | 0 | 0 | 0.00000 |
| HETATM | 299 | Pt | 7.03779  | 5.78785  | 21.82140 | Pt | 0 | 0 | 0.00000 |
| HETATM | 300 | Pt | 7.03708  | 14.16082 | 21.82216 | Pt | 0 | 0 | 0.00000 |
| HETATM | 301 | Pt | 14.28957 | 26.72206 | 21.82189 | Pt | 0 | 0 | 0.00000 |
| HETATM | 302 | Pt | 14.28928 | 9.97511  | 21.82361 | Pt | 0 | 0 | 0.00000 |
| HETATM | 303 | Pt | 14.29063 | 18.34856 | 21.82136 | Pt | 0 | 0 | 0.00000 |
| HETATM | 304 | Pt | 21.54125 | 30.90888 | 21.82180 | Pt | 0 | 0 | 0.00000 |
| HETATM | 305 | Pt | 21.54134 | 14.16145 | 21.82127 | Pt | 0 | 0 | 0.00000 |
| HETATM | 306 | Pt | 21.54105 | 22.53566 | 21.82236 | Pt | 0 | 0 | 0.00000 |
| HETATM | 307 | Pt | 7.03849  | 25.32572 | 21.82081 | Pt | 0 | 0 | 0.00000 |
| HETATM | 308 | Pt | 7.03826  | 8.57769  | 21.82069 | Pt | 0 | 0 | 0.00000 |
| HETATM | 309 | Pt | 7.03865  | 16.95113 | 21.82105 | Pt | 0 | 0 | 0.00000 |
| HETATM | 310 | Pt | 14.29044 | 29.51233 | 21.82168 | Pt | 0 | 0 | 0.00000 |
| HETATM | 311 | Pt | 14.28953 | 12.76491 | 21.82334 | Pt | 0 | 0 | 0.00000 |
| HETATM | 312 | Pt | 14.29008 | 21.13836 | 21.82300 | Pt | 0 | 0 | 0.00000 |
| HETATM | 313 | Pt | 21.54195 | 33.69891 | 21.82161 | Pt | 0 | 0 | 0.00000 |
| HETATM | 314 | Pt | 21.54224 | 16.95190 | 21.82103 | Pt | 0 | 0 | 0.00000 |
| HETATM | 315 | Pt | 21.54204 | 25.32570 | 21.82199 | Pt | 0 | 0 | 0.00000 |
| HETATM | 316 | Pt | 7.03785  | 28.11555 | 21.82129 | Pt | 0 | 0 | 0.00000 |
| HETATM | 317 | Pt | 7.03771  | 11.36865 | 21.82232 | Pt | 0 | 0 | 0.00000 |
| HETATM | 318 | Pt | 7.03692  | 19.74316 | 21.81956 | Pt | 0 | 0 | 0.00000 |
| HETATM | 319 | Pt | 14.28958 | 32.30264 | 21.82236 | Pt | 0 | 0 | 0.00000 |
| HETATM | 320 | Pt | 14.29050 | 15.55512 | 21.82069 | Pt | 0 | 0 | 0.00000 |
| HETATM | 321 | Pt | 14.28949 | 23.92863 | 21.82224 | Pt | 0 | 0 | 0.00000 |
| HETATM | 322 | Pt | 21.54101 | 36.48899 | 21.82170 | Pt | 0 | 0 | 0.00000 |
| HETATM | 323 | Pt | 21.54097 | 19.74227 | 21.82204 | Pt | 0 | 0 | 0.00000 |
| HETATM | 324 | Pt | 21.54126 | 28.11571 | 21.82196 | Pt | 0 | 0 | 0.00000 |
| HETATM | 325 | Pt | 3.00987  | 21.13817 | 24.11196 | Pt | 0 | 0 | 0.00000 |
| HETATM | 326 | Pt | 3.00955  | 4.39107  | 24.11080 | Pt | 0 | 0 | 0.00000 |
| HETATM | 327 | Pt | 3.01016  | 12.76617 | 24.11329 | Pt | 0 | 0 | 0.00000 |
| HETATM | 328 | Pt | 10.26161 | 25.32473 | 24.11202 | Pt | 0 | 0 | 0.00000 |
| HETATM | 329 | Pt | 10.26124 | 8.57882  | 24.11344 | Pt | 0 | 0 | 0.00000 |
| HETATM | 330 | Pt | 10.26187 | 16.95138 | 24.09589 | Pt | 0 | 0 | 0.00000 |
| HETATM | 331 | Pt | 17.51316 | 29.51226 | 24.11184 | Pt | 0 | 0 | 0.00000 |
| HETATM | 332 | Pt | 17.51263 | 12.76505 | 24.11323 | Pt | 0 | 0 | 0.00000 |
| HETATM | 333 | Pt | 17.51167 | 21.13855 | 24.11329 | Pt | 0 | 0 | 0.00000 |
| HETATM | 334 | Pt | 3.01105  | 23.92746 | 24.10160 | Pt | 0 | 0 | 0.00000 |
| HETATM | 335 | Pt | 3.01050  | 7.18038  | 24.10157 | Pt | 0 | 0 | 0.00000 |
| HETATM | 336 | Pt | 3.01137  | 15.55490 | 24.10336 | Pt | 0 | 0 | 0.00000 |
| HETATM | 337 | Pt | 10.26302 | 28.11419 | 24.10207 | Pt | 0 | 0 | 0.00000 |
| HETATM | 338 | Pt | 10.26400 | 11.36781 | 24.10429 | Pt | 0 | 0 | 0.00000 |
| HETATM | 339 | Pt | 10.26025 | 19.74354 | 24.09560 | Pt | 0 | 0 | 0.00000 |
| HETATM | 340 | Pt | 17.51445 | 32.30147 | 24.10232 | Pt | 0 | 0 | 0.00000 |
| HETATM | 341 | Pt | 17.51600 | 15.55436 | 24.10001 | Pt | 0 | 0 | 0.00000 |
| HETATM | 342 | Pt | 17.51405 | 23.92782 | 24.10266 | Pt | 0 | 0 | 0.00000 |
| HETATM | 343 | Pt | 3.01106  | 26.72281 | 24.10114 | Pt | 0 | 0 | 0.00000 |
| HETATM | 344 | Pt | 3.01100  | 9.97648  | 24.10259 | Pt | 0 | 0 | 0.00000 |
| HETATM | 345 | Pt | 3.01151  | 18.34911 | 24.10278 | Pt | 0 | 0 | 0.00000 |
| HETATM | 346 | Pt | 10.26303 | 30.90986 | 24.10221 | Pt | 0 | 0 | 0.00000 |
| HETATM | 347 | Pt | 10.26084 | 14.16057 | 24.10287 | Pt | 0 | 0 | 0.00000 |
| HETATM | 348 | Pt | 10.26329 | 22.53584 | 24.10226 | Pt | 0 | 0 | 0.00000 |
| HETATM | 349 | Pt | 17.51395 | 35.09680 | 24.10299 | Pt | 0 | 0 | 0.00000 |
| HETATM | 350 | Pt | 17.51337 | 18.34928 | 24.10258 | Pt | 0 | 0 | 0.00000 |
| HETATM | 351 | Pt | 17.51443 | 26.72309 | 24.10229 | Pt | 0 | 0 | 0.00000 |
| HETATM | 352 | Pt | 5.42418  | 22.53462 | 24.10070 | Pt | 0 | 0 | 0.00000 |
| HETATM | 353 | Pt | 5.42414  | 5.78659  | 24.10129 | Pt | 0 | 0 | 0.00000 |

|        |     |    |          |          |          |    |   |   |         |
|--------|-----|----|----------|----------|----------|----|---|---|---------|
| HETATM | 354 | Pt | 5.42482  | 14.16270 | 24.10541 | Pt | 0 | 0 | 0.00000 |
| HETATM | 355 | Pt | 12.67629 | 26.72081 | 24.10231 | Pt | 0 | 0 | 0.00000 |
| HETATM | 356 | Pt | 12.67636 | 9.97502  | 24.10605 | Pt | 0 | 0 | 0.00000 |
| HETATM | 357 | Pt | 12.67847 | 18.34714 | 24.09887 | Pt | 0 | 0 | 0.00000 |
| HETATM | 358 | Pt | 19.92796 | 30.90810 | 24.10213 | Pt | 0 | 0 | 0.00000 |
| HETATM | 359 | Pt | 19.92840 | 14.16059 | 24.10149 | Pt | 0 | 0 | 0.00000 |
| HETATM | 360 | Pt | 19.92723 | 22.53464 | 24.10292 | Pt | 0 | 0 | 0.00000 |
| HETATM | 361 | Pt | 5.42668  | 25.32550 | 24.09608 | Pt | 0 | 0 | 0.00000 |
| HETATM | 362 | Pt | 5.42606  | 8.57756  | 24.09659 | Pt | 0 | 0 | 0.00000 |
| HETATM | 363 | Pt | 5.42880  | 16.95169 | 24.10021 | Pt | 0 | 0 | 0.00000 |
| HETATM | 364 | Pt | 12.67881 | 29.51224 | 24.09746 | Pt | 0 | 0 | 0.00000 |
| HETATM | 365 | Pt | 12.67697 | 12.76576 | 24.10217 | Pt | 0 | 0 | 0.00000 |
| HETATM | 366 | Pt | 12.67796 | 21.13675 | 24.10008 | Pt | 0 | 0 | 0.00000 |
| HETATM | 367 | Pt | 19.93027 | 33.69899 | 24.09733 | Pt | 0 | 0 | 0.00000 |
| HETATM | 368 | Pt | 19.93096 | 16.95198 | 24.09634 | Pt | 0 | 0 | 0.00000 |
| HETATM | 369 | Pt | 19.93022 | 25.32565 | 24.09767 | Pt | 0 | 0 | 0.00000 |
| HETATM | 370 | Pt | 5.42437  | 28.11612 | 24.10115 | Pt | 0 | 0 | 0.00000 |
| HETATM | 371 | Pt | 5.42512  | 11.37000 | 24.10278 | Pt | 0 | 0 | 0.00000 |
| HETATM | 372 | Pt | 5.42430  | 19.74222 | 24.10253 | Pt | 0 | 0 | 0.00000 |
| HETATM | 373 | Pt | 12.67642 | 32.30382 | 24.10316 | Pt | 0 | 0 | 0.00000 |
| HETATM | 374 | Pt | 12.67782 | 15.55682 | 24.09791 | Pt | 0 | 0 | 0.00000 |
| HETATM | 375 | Pt | 12.67627 | 23.92872 | 24.10299 | Pt | 0 | 0 | 0.00000 |
| HETATM | 376 | Pt | 19.92770 | 36.48987 | 24.10218 | Pt | 0 | 0 | 0.00000 |
| HETATM | 377 | Pt | 19.92707 | 19.74298 | 24.10261 | Pt | 0 | 0 | 0.00000 |
| HETATM | 378 | Pt | 19.92793 | 28.11657 | 24.10226 | Pt | 0 | 0 | 0.00000 |
| HETATM | 379 | Pt | 7.84497  | 23.93229 | 24.10057 | Pt | 0 | 0 | 0.00000 |
| HETATM | 380 | Pt | 7.84495  | 7.18409  | 24.10186 | Pt | 0 | 0 | 0.00000 |
| HETATM | 381 | Pt | 7.84501  | 15.55522 | 24.10146 | Pt | 0 | 0 | 0.00000 |
| HETATM | 382 | Pt | 15.09695 | 28.11882 | 24.10221 | Pt | 0 | 0 | 0.00000 |
| HETATM | 383 | Pt | 15.09580 | 11.37239 | 24.10588 | Pt | 0 | 0 | 0.00000 |
| HETATM | 384 | Pt | 15.09503 | 19.74525 | 24.10536 | Pt | 0 | 0 | 0.00000 |
| HETATM | 385 | Pt | 0.59353  | 19.74507 | 24.10214 | Pt | 0 | 0 | 0.00000 |
| HETATM | 386 | Pt | 0.59373  | 2.99776  | 24.10115 | Pt | 0 | 0 | 0.00000 |
| HETATM | 387 | Pt | 0.59335  | 11.37223 | 24.10295 | Pt | 0 | 0 | 0.00000 |
| HETATM | 388 | Pt | 7.84530  | 26.71842 | 24.10156 | Pt | 0 | 0 | 0.00000 |
| HETATM | 389 | Pt | 7.84380  | 9.96973  | 24.09919 | Pt | 0 | 0 | 0.00000 |
| HETATM | 390 | Pt | 7.84371  | 18.34901 | 24.09513 | Pt | 0 | 0 | 0.00000 |
| HETATM | 391 | Pt | 15.09704 | 30.90572 | 24.10234 | Pt | 0 | 0 | 0.00000 |
| HETATM | 392 | Pt | 15.09786 | 14.15784 | 24.10136 | Pt | 0 | 0 | 0.00000 |
| HETATM | 393 | Pt | 15.09616 | 22.53173 | 24.10341 | Pt | 0 | 0 | 0.00000 |
| HETATM | 394 | Pt | 0.59342  | 22.53165 | 24.10200 | Pt | 0 | 0 | 0.00000 |
| HETATM | 395 | Pt | 0.59330  | 5.78484  | 24.10158 | Pt | 0 | 0 | 0.00000 |
| HETATM | 396 | Pt | 0.59346  | 14.15882 | 24.10266 | Pt | 0 | 0 | 0.00000 |
| HETATM | 397 | Pt | 7.84418  | 29.51162 | 24.09110 | Pt | 0 | 0 | 0.00000 |
| HETATM | 398 | Pt | 7.84521  | 12.76766 | 24.09473 | Pt | 0 | 0 | 0.00000 |
| HETATM | 399 | Pt | 7.84389  | 21.13894 | 24.09056 | Pt | 0 | 0 | 0.00000 |
| HETATM | 400 | Pt | 15.09570 | 33.69950 | 24.09317 | Pt | 0 | 0 | 0.00000 |
| HETATM | 401 | Pt | 15.09439 | 16.95150 | 24.09286 | Pt | 0 | 0 | 0.00000 |
| HETATM | 402 | Pt | 15.09573 | 25.32528 | 24.09207 | Pt | 0 | 0 | 0.00000 |
| HETATM | 403 | Pt | 0.59257  | 25.32504 | 24.09108 | Pt | 0 | 0 | 0.00000 |
| HETATM | 404 | Pt | 0.59187  | 8.57860  | 24.09226 | Pt | 0 | 0 | 0.00000 |
| HETATM | 405 | Pt | 0.59241  | 16.95195 | 24.09196 | Pt | 0 | 0 | 0.00000 |
| HETATM | 406 | Pt | 3.81416  | 22.53017 | 26.40004 | Pt | 0 | 0 | 0.00000 |
| HETATM | 407 | Pt | 3.81281  | 5.78259  | 26.39940 | Pt | 0 | 0 | 0.00000 |
| HETATM | 408 | Pt | 3.81647  | 14.15987 | 26.40323 | Pt | 0 | 0 | 0.00000 |
| HETATM | 409 | Pt | 11.06514 | 26.71591 | 26.40044 | Pt | 0 | 0 | 0.00000 |
| HETATM | 410 | Pt | 11.06306 | 9.97093  | 26.40469 | Pt | 0 | 0 | 0.00000 |
| HETATM | 411 | Pt | 11.06180 | 18.34823 | 26.37266 | Pt | 0 | 0 | 0.00000 |
| HETATM | 412 | Pt | 18.31703 | 30.90427 | 26.40045 | Pt | 0 | 0 | 0.00000 |
| HETATM | 413 | Pt | 18.31849 | 14.15740 | 26.39993 | Pt | 0 | 0 | 0.00000 |
| HETATM | 414 | Pt | 18.31495 | 22.53017 | 26.40145 | Pt | 0 | 0 | 0.00000 |
| HETATM | 415 | Pt | 3.81202  | 25.32519 | 26.37093 | Pt | 0 | 0 | 0.00000 |
| HETATM | 416 | Pt | 3.81044  | 8.57724  | 26.37127 | Pt | 0 | 0 | 0.00000 |



|        |     |    |          |          |          |    |   |   |         |
|--------|-----|----|----------|----------|----------|----|---|---|---------|
| HETATM | 417 | Pt | 3.81351  | 16.95271 | 26.37396 | Pt | 0 | 0 | 0.00000 |
| HETATM | 418 | Pt | 11.06379 | 29.51107 | 26.37188 | Pt | 0 | 0 | 0.00000 |
| HETATM | 419 | Pt | 11.05965 | 12.77031 | 26.38600 | Pt | 0 | 0 | 0.00000 |
| HETATM | 420 | Pt | 11.06392 | 21.13442 | 26.37528 | Pt | 0 | 0 | 0.00000 |
| HETATM | 421 | Pt | 18.31573 | 33.69898 | 26.37219 | Pt | 0 | 0 | 0.00000 |
| HETATM | 422 | Pt | 18.31795 | 16.95270 | 26.37046 | Pt | 0 | 0 | 0.00000 |
| HETATM | 423 | Pt | 18.31496 | 25.32520 | 26.37229 | Pt | 0 | 0 | 0.00000 |
| HETATM | 424 | Pt | 3.81336  | 2.99878  | 26.39931 | Pt | 0 | 0 | 0.00000 |
| HETATM | 425 | Pt | 3.81344  | 11.37386 | 26.40101 | Pt | 0 | 0 | 0.00000 |
| HETATM | 426 | Pt | 3.81525  | 19.74602 | 26.40123 | Pt | 0 | 0 | 0.00000 |
| HETATM | 427 | Pt | 11.06523 | 7.18536  | 26.40076 | Pt | 0 | 0 | 0.00000 |
| HETATM | 428 | Pt | 11.06540 | 15.55802 | 26.38287 | Pt | 0 | 0 | 0.00000 |
| HETATM | 429 | Pt | 11.06471 | 23.93089 | 26.40128 | Pt | 0 | 0 | 0.00000 |
| HETATM | 430 | Pt | 18.31702 | 11.37290 | 26.40094 | Pt | 0 | 0 | 0.00000 |
| HETATM | 431 | Pt | 18.31510 | 19.74629 | 26.40115 | Pt | 0 | 0 | 0.00000 |
| HETATM | 432 | Pt | 18.31688 | 28.12006 | 26.40052 | Pt | 0 | 0 | 0.00000 |
| HETATM | 433 | Pt | 6.23389  | 23.92746 | 26.37017 | Pt | 0 | 0 | 0.00000 |
| HETATM | 434 | Pt | 6.23336  | 7.17794  | 26.37112 | Pt | 0 | 0 | 0.00000 |
| HETATM | 435 | Pt | 6.24058  | 15.55960 | 26.38177 | Pt | 0 | 0 | 0.00000 |
| HETATM | 436 | Pt | 13.48607 | 28.11292 | 26.37201 | Pt | 0 | 0 | 0.00000 |
| HETATM | 437 | Pt | 13.48566 | 11.36992 | 26.38059 | Pt | 0 | 0 | 0.00000 |
| HETATM | 438 | Pt | 13.47840 | 19.73620 | 26.38187 | Pt | 0 | 0 | 0.00000 |
| HETATM | 439 | Pt | 20.73837 | 32.30040 | 26.37190 | Pt | 0 | 0 | 0.00000 |
| HETATM | 440 | Pt | 20.73938 | 15.55313 | 26.37076 | Pt | 0 | 0 | 0.00000 |
| HETATM | 441 | Pt | 20.73734 | 23.92722 | 26.37263 | Pt | 0 | 0 | 0.00000 |
| HETATM | 442 | Pt | 6.23425  | 26.72360 | 26.37089 | Pt | 0 | 0 | 0.00000 |
| HETATM | 443 | Pt | 6.23129  | 9.97447  | 26.37152 | Pt | 0 | 0 | 0.00000 |
| HETATM | 444 | Pt | 6.23759  | 18.34847 | 26.37645 | Pt | 0 | 0 | 0.00000 |
| HETATM | 445 | Pt | 13.48637 | 30.91061 | 26.37226 | Pt | 0 | 0 | 0.00000 |
| HETATM | 446 | Pt | 13.49041 | 14.16835 | 26.36754 | Pt | 0 | 0 | 0.00000 |
| HETATM | 447 | Pt | 13.48471 | 22.53514 | 26.37421 | Pt | 0 | 0 | 0.00000 |
| HETATM | 448 | Pt | 20.73847 | 35.09732 | 26.37185 | Pt | 0 | 0 | 0.00000 |
| HETATM | 449 | Pt | 20.73842 | 18.35072 | 26.37134 | Pt | 0 | 0 | 0.00000 |
| HETATM | 450 | Pt | 20.73800 | 26.72429 | 26.37230 | Pt | 0 | 0 | 0.00000 |
| HETATM | 451 | Pt | 6.24115  | 4.39025  | 26.36856 | Pt | 0 | 0 | 0.00000 |
| HETATM | 452 | Pt | 6.24413  | 12.76622 | 26.36893 | Pt | 0 | 0 | 0.00000 |
| HETATM | 453 | Pt | 6.24208  | 21.13926 | 26.36578 | Pt | 0 | 0 | 0.00000 |
| HETATM | 454 | Pt | 13.49273 | 8.57938  | 26.37212 | Pt | 0 | 0 | 0.00000 |
| HETATM | 455 | Pt | 13.48299 | 16.95033 | 26.37906 | Pt | 0 | 0 | 0.00000 |
| HETATM | 456 | Pt | 13.49280 | 25.32415 | 26.36996 | Pt | 0 | 0 | 0.00000 |
| HETATM | 457 | Pt | 20.74618 | 12.76459 | 26.36853 | Pt | 0 | 0 | 0.00000 |
| HETATM | 458 | Pt | 20.74391 | 21.13882 | 26.37019 | Pt | 0 | 0 | 0.00000 |
| HETATM | 459 | Pt | 20.74526 | 29.51239 | 26.36959 | Pt | 0 | 0 | 0.00000 |
| HETATM | 460 | Pt | 8.65393  | 25.32431 | 26.39997 | Pt | 0 | 0 | 0.00000 |
| HETATM | 461 | Pt | 8.65284  | 8.57603  | 26.40145 | Pt | 0 | 0 | 0.00000 |
| HETATM | 462 | Pt | 8.65110  | 16.96244 | 26.36672 | Pt | 0 | 0 | 0.00000 |
| HETATM | 463 | Pt | 15.90583 | 29.51204 | 26.40047 | Pt | 0 | 0 | 0.00000 |
| HETATM | 464 | Pt | 15.90529 | 12.76659 | 26.40570 | Pt | 0 | 0 | 0.00000 |
| HETATM | 465 | Pt | 15.90159 | 21.13674 | 26.40335 | Pt | 0 | 0 | 0.00000 |
| HETATM | 466 | Pt | 1.40314  | 21.13808 | 26.40033 | Pt | 0 | 0 | 0.00000 |
| HETATM | 467 | Pt | 1.40259  | 4.39110  | 26.39936 | Pt | 0 | 0 | 0.00000 |
| HETATM | 468 | Pt | 1.40298  | 12.76627 | 26.40146 | Pt | 0 | 0 | 0.00000 |
| HETATM | 469 | Pt | 8.64550  | 28.12296 | 26.36897 | Pt | 0 | 0 | 0.00000 |
| HETATM | 470 | Pt | 8.63998  | 11.37124 | 26.35991 | Pt | 0 | 0 | 0.00000 |
| HETATM | 471 | Pt | 8.64814  | 19.74725 | 26.37336 | Pt | 0 | 0 | 0.00000 |
| HETATM | 472 | Pt | 15.89719 | 32.31142 | 26.36988 | Pt | 0 | 0 | 0.00000 |
| HETATM | 473 | Pt | 15.90231 | 15.56559 | 26.36336 | Pt | 0 | 0 | 0.00000 |
| HETATM | 474 | Pt | 15.89607 | 23.93666 | 26.37019 | Pt | 0 | 0 | 0.00000 |
| HETATM | 475 | Pt | 1.39436  | 23.93690 | 26.36899 | Pt | 0 | 0 | 0.00000 |
| HETATM | 476 | Pt | 1.39313  | 7.19011  | 26.36921 | Pt | 0 | 0 | 0.00000 |
| HETATM | 477 | Pt | 1.39454  | 15.56457 | 26.37017 | Pt | 0 | 0 | 0.00000 |
| HETATM | 478 | Pt | 8.64510  | 5.77740  | 26.36858 | Pt | 0 | 0 | 0.00000 |
| HETATM | 479 | Pt | 8.65531  | 14.16074 | 26.39163 | Pt | 0 | 0 | 0.00000 |

|        |     |    |          |          |          |    |   |   |         |
|--------|-----|----|----------|----------|----------|----|---|---|---------|
| HETATM | 480 | Pt | 8.64454  | 22.52652 | 26.36542 | Pt | 0 | 0 | 0.00000 |
| HETATM | 481 | Pt | 15.89719 | 9.96702  | 26.37185 | Pt | 0 | 0 | 0.00000 |
| HETATM | 482 | Pt | 15.89406 | 18.33791 | 26.36960 | Pt | 0 | 0 | 0.00000 |
| HETATM | 483 | Pt | 15.89700 | 26.71302 | 26.36971 | Pt | 0 | 0 | 0.00000 |
| HETATM | 484 | Pt | 1.39434  | 1.59208  | 26.36851 | Pt | 0 | 0 | 0.00000 |
| HETATM | 485 | Pt | 1.39330  | 9.96680  | 26.37027 | Pt | 0 | 0 | 0.00000 |
| HETATM | 486 | Pt | 1.39449  | 18.33987 | 26.36973 | Pt | 0 | 0 | 0.00000 |
| HETATM | 487 | Pt | 2.21217  | 19.75276 | 28.73809 | Pt | 0 | 0 | 0.00000 |
| HETATM | 488 | Pt | 2.21001  | 3.00509  | 28.73691 | Pt | 0 | 0 | 0.00000 |
| HETATM | 489 | Pt | 2.20735  | 11.38016 | 28.73936 | Pt | 0 | 0 | 0.00000 |
| HETATM | 490 | Pt | 9.46009  | 23.93670 | 28.73800 | Pt | 0 | 0 | 0.00000 |
| HETATM | 491 | Pt | 9.46040  | 7.18582  | 28.73560 | Pt | 0 | 0 | 0.00000 |
| HETATM | 492 | Pt | 9.44537  | 15.56130 | 28.71966 | Pt | 0 | 0 | 0.00000 |
| HETATM | 493 | Pt | 16.71326 | 28.12556 | 28.73826 | Pt | 0 | 0 | 0.00000 |
| HETATM | 494 | Pt | 16.71758 | 11.37914 | 28.74171 | Pt | 0 | 0 | 0.00000 |
| HETATM | 495 | Pt | 16.71263 | 19.75308 | 28.73836 | Pt | 0 | 0 | 0.00000 |
| HETATM | 496 | Pt | 2.21160  | 22.52340 | 28.73730 | Pt | 0 | 0 | 0.00000 |
| HETATM | 497 | Pt | 2.20949  | 5.77634  | 28.73752 | Pt | 0 | 0 | 0.00000 |
| HETATM | 498 | Pt | 2.21048  | 14.15329 | 28.73861 | Pt | 0 | 0 | 0.00000 |
| HETATM | 499 | Pt | 9.46127  | 26.70851 | 28.73748 | Pt | 0 | 0 | 0.00000 |
| HETATM | 500 | Pt | 9.45970  | 9.95395  | 28.74832 | Pt | 0 | 0 | 0.00000 |
| HETATM | 501 | Pt | 9.45068  | 18.36428 | 28.64849 | Pt | 0 | 0 | 0.00000 |
| HETATM | 502 | Pt | 16.71387 | 30.89694 | 28.73785 | Pt | 0 | 0 | 0.00000 |
| HETATM | 503 | Pt | 16.71834 | 14.15348 | 28.74008 | Pt | 0 | 0 | 0.00000 |
| HETATM | 504 | Pt | 16.70950 | 22.52299 | 28.73866 | Pt | 0 | 0 | 0.00000 |
| HETATM | 505 | Pt | 2.21513  | 25.32500 | 28.69157 | Pt | 0 | 0 | 0.00000 |
| HETATM | 506 | Pt | 2.21240  | 8.57750  | 28.69213 | Pt | 0 | 0 | 0.00000 |
| HETATM | 507 | Pt | 2.21829  | 16.95315 | 28.69318 | Pt | 0 | 0 | 0.00000 |
| HETATM | 508 | Pt | 9.46645  | 29.50906 | 28.69214 | Pt | 0 | 0 | 0.00000 |
| HETATM | 509 | Pt | 9.44618  | 12.76139 | 28.68956 | Pt | 0 | 0 | 0.00000 |
| HETATM | 510 | Pt | 9.45515  | 21.13203 | 28.67301 | Pt | 0 | 0 | 0.00000 |
| HETATM | 511 | Pt | 16.71963 | 33.69812 | 28.69282 | Pt | 0 | 0 | 0.00000 |
| HETATM | 512 | Pt | 16.72773 | 16.95452 | 28.69012 | Pt | 0 | 0 | 0.00000 |
| HETATM | 513 | Pt | 16.71676 | 25.32387 | 28.69241 | Pt | 0 | 0 | 0.00000 |
| HETATM | 514 | Pt | 4.61310  | 21.13807 | 28.73830 | Pt | 0 | 0 | 0.00000 |
| HETATM | 515 | Pt | 4.60944  | 4.39038  | 28.73701 | Pt | 0 | 0 | 0.00000 |
| HETATM | 516 | Pt | 4.60619  | 12.76487 | 28.73728 | Pt | 0 | 0 | 0.00000 |
| HETATM | 517 | Pt | 11.86053 | 25.32225 | 28.73823 | Pt | 0 | 0 | 0.00000 |
| HETATM | 518 | Pt | 11.86207 | 8.57174  | 28.74072 | Pt | 0 | 0 | 0.00000 |
| HETATM | 519 | Pt | 11.88081 | 16.98103 | 28.69492 | Pt | 0 | 0 | 0.00000 |
| HETATM | 520 | Pt | 19.11379 | 29.51173 | 28.73808 | Pt | 0 | 0 | 0.00000 |
| HETATM | 521 | Pt | 19.11637 | 12.76485 | 28.73580 | Pt | 0 | 0 | 0.00000 |
| HETATM | 522 | Pt | 19.11175 | 21.13928 | 28.73916 | Pt | 0 | 0 | 0.00000 |
| HETATM | 523 | Pt | 4.63023  | 23.94653 | 28.63731 | Pt | 0 | 0 | 0.00000 |
| HETATM | 524 | Pt | 4.62887  | 7.19707  | 28.63726 | Pt | 0 | 0 | 0.00000 |
| HETATM | 525 | Pt | 4.63710  | 15.57736 | 28.64286 | Pt | 0 | 0 | 0.00000 |
| HETATM | 526 | Pt | 11.88243 | 28.13013 | 28.63818 | Pt | 0 | 0 | 0.00000 |
| HETATM | 527 | Pt | 11.87869 | 11.37573 | 28.64875 | Pt | 0 | 0 | 0.00000 |
| HETATM | 528 | Pt | 11.86205 | 19.74957 | 28.67011 | Pt | 0 | 0 | 0.00000 |
| HETATM | 529 | Pt | 19.13538 | 32.31897 | 28.63825 | Pt | 0 | 0 | 0.00000 |
| HETATM | 530 | Pt | 19.13832 | 15.57304 | 28.63695 | Pt | 0 | 0 | 0.00000 |
| HETATM | 531 | Pt | 19.13271 | 23.94579 | 28.63878 | Pt | 0 | 0 | 0.00000 |
| HETATM | 532 | Pt | 4.63048  | 26.70452 | 28.63714 | Pt | 0 | 0 | 0.00000 |
| HETATM | 533 | Pt | 4.62498  | 9.95445  | 28.63816 | Pt | 0 | 0 | 0.00000 |
| HETATM | 534 | Pt | 4.63778  | 18.33382 | 28.64041 | Pt | 0 | 0 | 0.00000 |
| HETATM | 535 | Pt | 11.88307 | 30.88785 | 28.63801 | Pt | 0 | 0 | 0.00000 |
| HETATM | 536 | Pt | 11.86850 | 14.16347 | 28.71772 | Pt | 0 | 0 | 0.00000 |
| HETATM | 537 | Pt | 11.87675 | 22.51193 | 28.64022 | Pt | 0 | 0 | 0.00000 |
| HETATM | 538 | Pt | 19.13602 | 35.07741 | 28.63816 | Pt | 0 | 0 | 0.00000 |
| HETATM | 539 | Pt | 19.13715 | 18.33289 | 28.63800 | Pt | 0 | 0 | 0.00000 |
| HETATM | 540 | Pt | 19.13379 | 26.70433 | 28.63838 | Pt | 0 | 0 | 0.00000 |
| HETATM | 541 | Pt | 7.03134  | 22.54631 | 28.68916 | Pt | 0 | 0 | 0.00000 |
| HETATM | 542 | Pt | 7.03216  | 5.79402  | 28.69164 | Pt | 0 | 0 | 0.00000 |

|                                 |     |    |          |          |          |    |   |   |         |
|---------------------------------|-----|----|----------|----------|----------|----|---|---|---------|
| HETATM                          | 543 | Pt | 7.03040  | 14.16341 | 28.68521 | Pt | 0 | 0 | 0.00000 |
| HETATM                          | 544 | Pt | 14.28428 | 26.72777 | 28.69226 | Pt | 0 | 0 | 0.00000 |
| HETATM                          | 545 | Pt | 14.28694 | 9.98176  | 28.69580 | Pt | 0 | 0 | 0.00000 |
| HETATM                          | 546 | Pt | 14.28912 | 18.35092 | 28.68957 | Pt | 0 | 0 | 0.00000 |
| HETATM                          | 547 | Pt | 21.53831 | 30.91688 | 28.69217 | Pt | 0 | 0 | 0.00000 |
| HETATM                          | 548 | Pt | 21.53828 | 14.16955 | 28.69161 | Pt | 0 | 0 | 0.00000 |
| HETATM                          | 549 | Pt | 21.53520 | 22.54386 | 28.69275 | Pt | 0 | 0 | 0.00000 |
| HETATM                          | 550 | Pt | 7.01923  | 25.32576 | 28.63726 | Pt | 0 | 0 | 0.00000 |
| HETATM                          | 551 | Pt | 7.01696  | 8.57452  | 28.63791 | Pt | 0 | 0 | 0.00000 |
| HETATM                          | 552 | Pt | 7.03423  | 16.96727 | 28.67875 | Pt | 0 | 0 | 0.00000 |
| HETATM                          | 553 | Pt | 14.27185 | 29.51011 | 28.63826 | Pt | 0 | 0 | 0.00000 |
| HETATM                          | 554 | Pt | 14.28313 | 12.76594 | 28.65997 | Pt | 0 | 0 | 0.00000 |
| HETATM                          | 555 | Pt | 14.26324 | 21.13196 | 28.64310 | Pt | 0 | 0 | 0.00000 |
| HETATM                          | 556 | Pt | 21.52482 | 33.69836 | 28.63808 | Pt | 0 | 0 | 0.00000 |
| HETATM                          | 557 | Pt | 21.52479 | 16.95215 | 28.63721 | Pt | 0 | 0 | 0.00000 |
| HETATM                          | 558 | Pt | 21.52274 | 25.32598 | 28.63877 | Pt | 0 | 0 | 0.00000 |
| HETATM                          | 559 | Pt | 7.03292  | 28.10631 | 28.69151 | Pt | 0 | 0 | 0.00000 |
| HETATM                          | 560 | Pt | 7.02107  | 11.35271 | 28.69582 | Pt | 0 | 0 | 0.00000 |
| HETATM                          | 561 | Pt | 7.04676  | 19.73966 | 28.67327 | Pt | 0 | 0 | 0.00000 |
| HETATM                          | 562 | Pt | 14.28591 | 32.29221 | 28.69289 | Pt | 0 | 0 | 0.00000 |
| HETATM                          | 563 | Pt | 14.29481 | 15.56741 | 28.66501 | Pt | 0 | 0 | 0.00000 |
| HETATM                          | 564 | Pt | 14.28167 | 23.91630 | 28.69337 | Pt | 0 | 0 | 0.00000 |
| HETATM                          | 565 | Pt | 21.53819 | 36.48017 | 28.69210 | Pt | 0 | 0 | 0.00000 |
| HETATM                          | 566 | Pt | 21.53666 | 19.73436 | 28.69219 | Pt | 0 | 0 | 0.00000 |
| HETATM                          | 567 | Pt | 21.53751 | 28.10782 | 28.69242 | Pt | 0 | 0 | 0.00000 |
| HETATM                          | 568 | O  | 3.01072  | 21.13914 | 29.85807 | O  | 0 | 0 | 0.00000 |
| HETATM                          | 569 | O  | 3.00978  | 4.39023  | 29.85745 | O  | 0 | 0 | 0.00000 |
| HETATM                          | 570 | O  | 3.01043  | 12.76661 | 29.85872 | O  | 0 | 0 | 0.00000 |
| HETATM                          | 571 | O  | 10.26042 | 25.32391 | 29.85812 | O  | 0 | 0 | 0.00000 |
| HETATM                          | 572 | O  | 10.25861 | 8.56610  | 29.86136 | O  | 0 | 0 | 0.00000 |
| HETATM                          | 573 | O  | 10.75472 | 15.03093 | 29.87563 | O  | 0 | 0 | 0.00000 |
| HETATM                          | 574 | O  | 17.51352 | 29.51186 | 29.85810 | O  | 0 | 0 | 0.00000 |
| HETATM                          | 575 | O  | 17.52296 | 12.76563 | 29.85935 | O  | 0 | 0 | 0.00000 |
| HETATM                          | 576 | O  | 17.51065 | 21.13774 | 29.85896 | O  | 0 | 0 | 0.00000 |
| UNIT ENERGY      kcal           |     |    |          |          |          |    |   |   |         |
| ENERGY            -73558.715531 |     |    |          |          |          |    |   |   |         |
| END                             |     |    |          |          |          |    |   |   |         |

XTLGRF 200  
DESCRP FS  
REMARK Pt111\_0.11ML\_9x9x7\_30.0\_vac fcc-displacement  
FIXATOMS      1      162  
CRYSTX      25.12092      25.12092      43.67409      90.00000      90.00000      60.00000  
FORMAT ATOM      (a6,1x,i5,1x,a5,1x,a3,1x,a1,1x,a5,3f10.5,1x,a5,i3,i2,1x,f8.5)  
HETATM      1 Pt      2.20377      19.74305      14.98634      Pt      0      0      0.00000  
HETATM      2 Pt      2.20377      2.99577      14.98634      Pt      0      0      0.00000  
HETATM      3 Pt      2.20377      11.36941      14.98634      Pt      0      0      0.00000  
HETATM      4 Pt      9.45555      23.92987      14.98634      Pt      0      0      0.00000  
HETATM      5 Pt      9.45555      7.18259      14.98634      Pt      0      0      0.00000  
HETATM      6 Pt      9.45555      15.55623      14.98634      Pt      0      0      0.00000  
HETATM      7 Pt      16.70734      28.11669      14.98634      Pt      0      0      0.00000  
HETATM      8 Pt      16.70734      11.36941      14.98634      Pt      0      0      0.00000  
HETATM      9 Pt      16.70734      19.74305      14.98634      Pt      0      0      0.00000  
HETATM      10 Pt      2.20377      22.53426      14.98634      Pt      0      0      0.00000  
HETATM      11 Pt      2.20377      5.78698      14.98634      Pt      0      0      0.00000  
HETATM      12 Pt      2.20377      14.16062      14.98634      Pt      0      0      0.00000  
HETATM      13 Pt      9.45555      26.72108      14.98634      Pt      0      0      0.00000  
HETATM      14 Pt      9.45555      9.97380      14.98634      Pt      0      0      0.00000  
HETATM      15 Pt      9.45555      18.34744      14.98634      Pt      0      0      0.00000  
HETATM      16 Pt      16.70734      30.90790      14.98634      Pt      0      0      0.00000  
HETATM      17 Pt      16.70734      14.16062      14.98634      Pt      0      0      0.00000  
HETATM      18 Pt      16.70734      22.53426      14.98634      Pt      0      0      0.00000  
HETATM      19 Pt      2.20377      25.32547      14.98634      Pt      0      0      0.00000

|        |    |    |          |          |          |    |   |   |         |
|--------|----|----|----------|----------|----------|----|---|---|---------|
| HETATM | 20 | Pt | 2.20377  | 8.57819  | 14.98634 | Pt | 0 | 0 | 0.00000 |
| HETATM | 21 | Pt | 2.20377  | 16.95183 | 14.98634 | Pt | 0 | 0 | 0.00000 |
| HETATM | 22 | Pt | 9.45555  | 29.51229 | 14.98634 | Pt | 0 | 0 | 0.00000 |
| HETATM | 23 | Pt | 9.45555  | 12.76501 | 14.98634 | Pt | 0 | 0 | 0.00000 |
| HETATM | 24 | Pt | 9.45555  | 21.13865 | 14.98634 | Pt | 0 | 0 | 0.00000 |
| HETATM | 25 | Pt | 16.70734 | 33.69911 | 14.98634 | Pt | 0 | 0 | 0.00000 |
| HETATM | 26 | Pt | 16.70734 | 16.95183 | 14.98634 | Pt | 0 | 0 | 0.00000 |
| HETATM | 27 | Pt | 16.70734 | 25.32547 | 14.98634 | Pt | 0 | 0 | 0.00000 |
| HETATM | 28 | Pt | 4.62103  | 21.13866 | 14.98634 | Pt | 0 | 0 | 0.00000 |
| HETATM | 29 | Pt | 4.62103  | 4.39138  | 14.98634 | Pt | 0 | 0 | 0.00000 |
| HETATM | 30 | Pt | 4.62103  | 12.76502 | 14.98634 | Pt | 0 | 0 | 0.00000 |
| HETATM | 31 | Pt | 11.87281 | 25.32548 | 14.98634 | Pt | 0 | 0 | 0.00000 |
| HETATM | 32 | Pt | 11.87281 | 8.57820  | 14.98634 | Pt | 0 | 0 | 0.00000 |
| HETATM | 33 | Pt | 11.87281 | 16.95184 | 14.98634 | Pt | 0 | 0 | 0.00000 |
| HETATM | 34 | Pt | 19.12460 | 29.51230 | 14.98634 | Pt | 0 | 0 | 0.00000 |
| HETATM | 35 | Pt | 19.12460 | 12.76502 | 14.98634 | Pt | 0 | 0 | 0.00000 |
| HETATM | 36 | Pt | 19.12460 | 21.13866 | 14.98634 | Pt | 0 | 0 | 0.00000 |
| HETATM | 37 | Pt | 4.62103  | 23.92987 | 14.98634 | Pt | 0 | 0 | 0.00000 |
| HETATM | 38 | Pt | 4.62103  | 7.18259  | 14.98634 | Pt | 0 | 0 | 0.00000 |
| HETATM | 39 | Pt | 4.62103  | 15.55623 | 14.98634 | Pt | 0 | 0 | 0.00000 |
| HETATM | 40 | Pt | 11.87281 | 28.11669 | 14.98634 | Pt | 0 | 0 | 0.00000 |
| HETATM | 41 | Pt | 11.87281 | 11.36941 | 14.98634 | Pt | 0 | 0 | 0.00000 |
| HETATM | 42 | Pt | 11.87281 | 19.74305 | 14.98634 | Pt | 0 | 0 | 0.00000 |
| HETATM | 43 | Pt | 19.12460 | 32.30351 | 14.98634 | Pt | 0 | 0 | 0.00000 |
| HETATM | 44 | Pt | 19.12460 | 15.55623 | 14.98634 | Pt | 0 | 0 | 0.00000 |
| HETATM | 45 | Pt | 19.12460 | 23.92987 | 14.98634 | Pt | 0 | 0 | 0.00000 |
| HETATM | 46 | Pt | 4.62103  | 26.72108 | 14.98634 | Pt | 0 | 0 | 0.00000 |
| HETATM | 47 | Pt | 4.62103  | 9.97380  | 14.98634 | Pt | 0 | 0 | 0.00000 |
| HETATM | 48 | Pt | 4.62103  | 18.34744 | 14.98634 | Pt | 0 | 0 | 0.00000 |
| HETATM | 49 | Pt | 11.87281 | 30.90790 | 14.98634 | Pt | 0 | 0 | 0.00000 |
| HETATM | 50 | Pt | 11.87281 | 14.16062 | 14.98634 | Pt | 0 | 0 | 0.00000 |
| HETATM | 51 | Pt | 11.87281 | 22.53426 | 14.98634 | Pt | 0 | 0 | 0.00000 |
| HETATM | 52 | Pt | 19.12460 | 35.09472 | 14.98634 | Pt | 0 | 0 | 0.00000 |
| HETATM | 53 | Pt | 19.12460 | 18.34744 | 14.98634 | Pt | 0 | 0 | 0.00000 |
| HETATM | 54 | Pt | 19.12460 | 26.72108 | 14.98634 | Pt | 0 | 0 | 0.00000 |
| HETATM | 55 | Pt | 7.03829  | 22.53426 | 14.98634 | Pt | 0 | 0 | 0.00000 |
| HETATM | 56 | Pt | 7.03829  | 5.78698  | 14.98634 | Pt | 0 | 0 | 0.00000 |
| HETATM | 57 | Pt | 7.03829  | 14.16062 | 14.98634 | Pt | 0 | 0 | 0.00000 |
| HETATM | 58 | Pt | 14.29007 | 26.72108 | 14.98634 | Pt | 0 | 0 | 0.00000 |
| HETATM | 59 | Pt | 14.29007 | 9.97380  | 14.98634 | Pt | 0 | 0 | 0.00000 |
| HETATM | 60 | Pt | 14.29007 | 18.34744 | 14.98634 | Pt | 0 | 0 | 0.00000 |
| HETATM | 61 | Pt | 21.54186 | 30.90790 | 14.98634 | Pt | 0 | 0 | 0.00000 |
| HETATM | 62 | Pt | 21.54186 | 14.16062 | 14.98634 | Pt | 0 | 0 | 0.00000 |
| HETATM | 63 | Pt | 21.54186 | 22.53426 | 14.98634 | Pt | 0 | 0 | 0.00000 |
| HETATM | 64 | Pt | 7.03829  | 25.32547 | 14.98634 | Pt | 0 | 0 | 0.00000 |
| HETATM | 65 | Pt | 7.03829  | 8.57819  | 14.98634 | Pt | 0 | 0 | 0.00000 |
| HETATM | 66 | Pt | 7.03829  | 16.95183 | 14.98634 | Pt | 0 | 0 | 0.00000 |
| HETATM | 67 | Pt | 14.29007 | 29.51229 | 14.98634 | Pt | 0 | 0 | 0.00000 |
| HETATM | 68 | Pt | 14.29007 | 12.76501 | 14.98634 | Pt | 0 | 0 | 0.00000 |
| HETATM | 69 | Pt | 14.29007 | 21.13865 | 14.98634 | Pt | 0 | 0 | 0.00000 |
| HETATM | 70 | Pt | 21.54186 | 33.69911 | 14.98634 | Pt | 0 | 0 | 0.00000 |
| HETATM | 71 | Pt | 21.54186 | 16.95183 | 14.98634 | Pt | 0 | 0 | 0.00000 |
| HETATM | 72 | Pt | 21.54186 | 25.32547 | 14.98634 | Pt | 0 | 0 | 0.00000 |
| HETATM | 73 | Pt | 7.03829  | 28.11669 | 14.98634 | Pt | 0 | 0 | 0.00000 |
| HETATM | 74 | Pt | 7.03829  | 11.36941 | 14.98634 | Pt | 0 | 0 | 0.00000 |
| HETATM | 75 | Pt | 7.03829  | 19.74305 | 14.98634 | Pt | 0 | 0 | 0.00000 |
| HETATM | 76 | Pt | 14.29007 | 32.30351 | 14.98634 | Pt | 0 | 0 | 0.00000 |
| HETATM | 77 | Pt | 14.29007 | 15.55623 | 14.98634 | Pt | 0 | 0 | 0.00000 |
| HETATM | 78 | Pt | 14.29007 | 23.92987 | 14.98634 | Pt | 0 | 0 | 0.00000 |
| HETATM | 79 | Pt | 21.54186 | 36.49033 | 14.98634 | Pt | 0 | 0 | 0.00000 |
| HETATM | 80 | Pt | 21.54186 | 19.74305 | 14.98634 | Pt | 0 | 0 | 0.00000 |
| HETATM | 81 | Pt | 21.54186 | 28.11669 | 14.98634 | Pt | 0 | 0 | 0.00000 |
| HETATM | 82 | Pt | 3.00952  | 21.13866 | 17.26536 | Pt | 0 | 0 | 0.00000 |

|        |     |    |          |          |          |    |   |   |         |
|--------|-----|----|----------|----------|----------|----|---|---|---------|
| HETATM | 83  | Pt | 3.00952  | 4.39138  | 17.26536 | Pt | 0 | 0 | 0.00000 |
| HETATM | 84  | Pt | 3.00952  | 12.76502 | 17.26536 | Pt | 0 | 0 | 0.00000 |
| HETATM | 85  | Pt | 10.26130 | 25.32548 | 17.26536 | Pt | 0 | 0 | 0.00000 |
| HETATM | 86  | Pt | 10.26130 | 8.57820  | 17.26536 | Pt | 0 | 0 | 0.00000 |
| HETATM | 87  | Pt | 10.26130 | 16.95184 | 17.26536 | Pt | 0 | 0 | 0.00000 |
| HETATM | 88  | Pt | 17.51309 | 29.51230 | 17.26536 | Pt | 0 | 0 | 0.00000 |
| HETATM | 89  | Pt | 17.51309 | 12.76502 | 17.26536 | Pt | 0 | 0 | 0.00000 |
| HETATM | 90  | Pt | 17.51309 | 21.13866 | 17.26536 | Pt | 0 | 0 | 0.00000 |
| HETATM | 91  | Pt | 3.00952  | 23.92987 | 17.26536 | Pt | 0 | 0 | 0.00000 |
| HETATM | 92  | Pt | 3.00952  | 7.18259  | 17.26536 | Pt | 0 | 0 | 0.00000 |
| HETATM | 93  | Pt | 3.00952  | 15.55623 | 17.26536 | Pt | 0 | 0 | 0.00000 |
| HETATM | 94  | Pt | 10.26130 | 28.11669 | 17.26536 | Pt | 0 | 0 | 0.00000 |
| HETATM | 95  | Pt | 10.26130 | 11.36941 | 17.26536 | Pt | 0 | 0 | 0.00000 |
| HETATM | 96  | Pt | 10.26130 | 19.74305 | 17.26536 | Pt | 0 | 0 | 0.00000 |
| HETATM | 97  | Pt | 17.51309 | 32.30351 | 17.26536 | Pt | 0 | 0 | 0.00000 |
| HETATM | 98  | Pt | 17.51309 | 15.55623 | 17.26536 | Pt | 0 | 0 | 0.00000 |
| HETATM | 99  | Pt | 17.51309 | 23.92987 | 17.26536 | Pt | 0 | 0 | 0.00000 |
| HETATM | 100 | Pt | 3.00952  | 26.72108 | 17.26536 | Pt | 0 | 0 | 0.00000 |
| HETATM | 101 | Pt | 3.00952  | 9.97380  | 17.26536 | Pt | 0 | 0 | 0.00000 |
| HETATM | 102 | Pt | 3.00952  | 18.34744 | 17.26536 | Pt | 0 | 0 | 0.00000 |
| HETATM | 103 | Pt | 10.26130 | 30.90790 | 17.26536 | Pt | 0 | 0 | 0.00000 |
| HETATM | 104 | Pt | 10.26130 | 14.16062 | 17.26536 | Pt | 0 | 0 | 0.00000 |
| HETATM | 105 | Pt | 10.26130 | 22.53426 | 17.26536 | Pt | 0 | 0 | 0.00000 |
| HETATM | 106 | Pt | 17.51309 | 35.09472 | 17.26536 | Pt | 0 | 0 | 0.00000 |
| HETATM | 107 | Pt | 17.51309 | 18.34744 | 17.26536 | Pt | 0 | 0 | 0.00000 |
| HETATM | 108 | Pt | 17.51309 | 26.72108 | 17.26536 | Pt | 0 | 0 | 0.00000 |
| HETATM | 109 | Pt | 5.42678  | 22.53426 | 17.26536 | Pt | 0 | 0 | 0.00000 |
| HETATM | 110 | Pt | 5.42678  | 5.78698  | 17.26536 | Pt | 0 | 0 | 0.00000 |
| HETATM | 111 | Pt | 5.42678  | 14.16062 | 17.26536 | Pt | 0 | 0 | 0.00000 |
| HETATM | 112 | Pt | 12.67856 | 26.72108 | 17.26536 | Pt | 0 | 0 | 0.00000 |
| HETATM | 113 | Pt | 12.67856 | 9.97380  | 17.26536 | Pt | 0 | 0 | 0.00000 |
| HETATM | 114 | Pt | 12.67856 | 18.34744 | 17.26536 | Pt | 0 | 0 | 0.00000 |
| HETATM | 115 | Pt | 19.93035 | 30.90790 | 17.26536 | Pt | 0 | 0 | 0.00000 |
| HETATM | 116 | Pt | 19.93035 | 14.16062 | 17.26536 | Pt | 0 | 0 | 0.00000 |
| HETATM | 117 | Pt | 19.93035 | 22.53426 | 17.26536 | Pt | 0 | 0 | 0.00000 |
| HETATM | 118 | Pt | 5.42678  | 25.32547 | 17.26536 | Pt | 0 | 0 | 0.00000 |
| HETATM | 119 | Pt | 5.42678  | 8.57819  | 17.26536 | Pt | 0 | 0 | 0.00000 |
| HETATM | 120 | Pt | 5.42678  | 16.95183 | 17.26536 | Pt | 0 | 0 | 0.00000 |
| HETATM | 121 | Pt | 12.67856 | 29.51229 | 17.26536 | Pt | 0 | 0 | 0.00000 |
| HETATM | 122 | Pt | 12.67856 | 12.76501 | 17.26536 | Pt | 0 | 0 | 0.00000 |
| HETATM | 123 | Pt | 12.67856 | 21.13865 | 17.26536 | Pt | 0 | 0 | 0.00000 |
| HETATM | 124 | Pt | 19.93035 | 33.69911 | 17.26536 | Pt | 0 | 0 | 0.00000 |
| HETATM | 125 | Pt | 19.93035 | 16.95183 | 17.26536 | Pt | 0 | 0 | 0.00000 |
| HETATM | 126 | Pt | 19.93035 | 25.32547 | 17.26536 | Pt | 0 | 0 | 0.00000 |
| HETATM | 127 | Pt | 5.42678  | 28.11669 | 17.26536 | Pt | 0 | 0 | 0.00000 |
| HETATM | 128 | Pt | 5.42678  | 11.36941 | 17.26536 | Pt | 0 | 0 | 0.00000 |
| HETATM | 129 | Pt | 5.42678  | 19.74305 | 17.26536 | Pt | 0 | 0 | 0.00000 |
| HETATM | 130 | Pt | 12.67856 | 32.30351 | 17.26536 | Pt | 0 | 0 | 0.00000 |
| HETATM | 131 | Pt | 12.67856 | 15.55623 | 17.26536 | Pt | 0 | 0 | 0.00000 |
| HETATM | 132 | Pt | 12.67856 | 23.92987 | 17.26536 | Pt | 0 | 0 | 0.00000 |
| HETATM | 133 | Pt | 19.93035 | 36.49033 | 17.26536 | Pt | 0 | 0 | 0.00000 |
| HETATM | 134 | Pt | 19.93035 | 19.74305 | 17.26536 | Pt | 0 | 0 | 0.00000 |
| HETATM | 135 | Pt | 19.93035 | 28.11669 | 17.26536 | Pt | 0 | 0 | 0.00000 |
| HETATM | 136 | Pt | 7.84404  | 23.92987 | 17.26536 | Pt | 0 | 0 | 0.00000 |
| HETATM | 137 | Pt | 7.84404  | 7.18259  | 17.26536 | Pt | 0 | 0 | 0.00000 |
| HETATM | 138 | Pt | 7.84404  | 15.55623 | 17.26536 | Pt | 0 | 0 | 0.00000 |
| HETATM | 139 | Pt | 15.09582 | 28.11669 | 17.26536 | Pt | 0 | 0 | 0.00000 |
| HETATM | 140 | Pt | 15.09582 | 11.36941 | 17.26536 | Pt | 0 | 0 | 0.00000 |
| HETATM | 141 | Pt | 15.09582 | 19.74305 | 17.26536 | Pt | 0 | 0 | 0.00000 |
| HETATM | 142 | Pt | 0.59226  | 19.74305 | 17.26536 | Pt | 0 | 0 | 0.00000 |
| HETATM | 143 | Pt | 0.59226  | 2.99577  | 17.26536 | Pt | 0 | 0 | 0.00000 |
| HETATM | 144 | Pt | 0.59226  | 11.36941 | 17.26536 | Pt | 0 | 0 | 0.00000 |
| HETATM | 145 | Pt | 7.84404  | 26.72108 | 17.26536 | Pt | 0 | 0 | 0.00000 |

|        |     |    |          |          |          |    |   |   |         |
|--------|-----|----|----------|----------|----------|----|---|---|---------|
| HETATM | 146 | Pt | 7.84404  | 9.97380  | 17.26536 | Pt | 0 | 0 | 0.00000 |
| HETATM | 147 | Pt | 7.84404  | 18.34744 | 17.26536 | Pt | 0 | 0 | 0.00000 |
| HETATM | 148 | Pt | 15.09582 | 30.90790 | 17.26536 | Pt | 0 | 0 | 0.00000 |
| HETATM | 149 | Pt | 15.09582 | 14.16062 | 17.26536 | Pt | 0 | 0 | 0.00000 |
| HETATM | 150 | Pt | 15.09582 | 22.53426 | 17.26536 | Pt | 0 | 0 | 0.00000 |
| HETATM | 151 | Pt | 0.59226  | 22.53426 | 17.26536 | Pt | 0 | 0 | 0.00000 |
| HETATM | 152 | Pt | 0.59226  | 5.78698  | 17.26536 | Pt | 0 | 0 | 0.00000 |
| HETATM | 153 | Pt | 0.59226  | 14.16062 | 17.26536 | Pt | 0 | 0 | 0.00000 |
| HETATM | 154 | Pt | 7.84404  | 29.51229 | 17.26536 | Pt | 0 | 0 | 0.00000 |
| HETATM | 155 | Pt | 7.84404  | 12.76501 | 17.26536 | Pt | 0 | 0 | 0.00000 |
| HETATM | 156 | Pt | 7.84404  | 21.13865 | 17.26536 | Pt | 0 | 0 | 0.00000 |
| HETATM | 157 | Pt | 15.09582 | 33.69911 | 17.26536 | Pt | 0 | 0 | 0.00000 |
| HETATM | 158 | Pt | 15.09582 | 16.95183 | 17.26536 | Pt | 0 | 0 | 0.00000 |
| HETATM | 159 | Pt | 15.09582 | 25.32547 | 17.26536 | Pt | 0 | 0 | 0.00000 |
| HETATM | 160 | Pt | 0.59226  | 25.32547 | 17.26536 | Pt | 0 | 0 | 0.00000 |
| HETATM | 161 | Pt | 0.59226  | 8.57819  | 17.26536 | Pt | 0 | 0 | 0.00000 |
| HETATM | 162 | Pt | 0.59226  | 16.95183 | 17.26536 | Pt | 0 | 0 | 0.00000 |
| HETATM | 163 | Pt | 3.81501  | 22.53412 | 19.54430 | Pt | 0 | 0 | 0.00000 |
| HETATM | 164 | Pt | 3.81521  | 5.78678  | 19.54443 | Pt | 0 | 0 | 0.00000 |
| HETATM | 165 | Pt | 3.81503  | 14.16033 | 19.54446 | Pt | 0 | 0 | 0.00000 |
| HETATM | 166 | Pt | 11.06693 | 26.72087 | 19.54441 | Pt | 0 | 0 | 0.00000 |
| HETATM | 167 | Pt | 11.06704 | 9.97380  | 19.54513 | Pt | 0 | 0 | 0.00000 |
| HETATM | 168 | Pt | 11.06726 | 18.34719 | 19.54257 | Pt | 0 | 0 | 0.00000 |
| HETATM | 169 | Pt | 18.31872 | 30.90768 | 19.54434 | Pt | 0 | 0 | 0.00000 |
| HETATM | 170 | Pt | 18.31859 | 14.16031 | 19.54435 | Pt | 0 | 0 | 0.00000 |
| HETATM | 171 | Pt | 18.31876 | 22.53408 | 19.54458 | Pt | 0 | 0 | 0.00000 |
| HETATM | 172 | Pt | 3.81528  | 25.32553 | 19.54324 | Pt | 0 | 0 | 0.00000 |
| HETATM | 173 | Pt | 3.81546  | 8.57825  | 19.54341 | Pt | 0 | 0 | 0.00000 |
| HETATM | 174 | Pt | 3.81540  | 16.95180 | 19.54319 | Pt | 0 | 0 | 0.00000 |
| HETATM | 175 | Pt | 11.06718 | 29.51233 | 19.54326 | Pt | 0 | 0 | 0.00000 |
| HETATM | 176 | Pt | 11.06687 | 12.76499 | 19.54510 | Pt | 0 | 0 | 0.00000 |
| HETATM | 177 | Pt | 11.06706 | 21.13887 | 19.54259 | Pt | 0 | 0 | 0.00000 |
| HETATM | 178 | Pt | 18.31884 | 33.69914 | 19.54317 | Pt | 0 | 0 | 0.00000 |
| HETATM | 179 | Pt | 18.31903 | 16.95175 | 19.54334 | Pt | 0 | 0 | 0.00000 |
| HETATM | 180 | Pt | 18.31893 | 25.32548 | 19.54338 | Pt | 0 | 0 | 0.00000 |
| HETATM | 181 | Pt | 3.81515  | 2.99603  | 19.54442 | Pt | 0 | 0 | 0.00000 |
| HETATM | 182 | Pt | 3.81500  | 11.36955 | 19.54451 | Pt | 0 | 0 | 0.00000 |
| HETATM | 183 | Pt | 3.81526  | 19.74322 | 19.54431 | Pt | 0 | 0 | 0.00000 |
| HETATM | 184 | Pt | 11.06697 | 7.18294  | 19.54460 | Pt | 0 | 0 | 0.00000 |
| HETATM | 185 | Pt | 11.06690 | 15.55572 | 19.54450 | Pt | 0 | 0 | 0.00000 |
| HETATM | 186 | Pt | 11.06688 | 23.93018 | 19.54430 | Pt | 0 | 0 | 0.00000 |
| HETATM | 187 | Pt | 18.31838 | 11.36970 | 19.54446 | Pt | 0 | 0 | 0.00000 |
| HETATM | 188 | Pt | 18.31898 | 19.74336 | 19.54443 | Pt | 0 | 0 | 0.00000 |
| HETATM | 189 | Pt | 18.31872 | 28.11691 | 19.54443 | Pt | 0 | 0 | 0.00000 |
| HETATM | 190 | Pt | 6.23234  | 23.93011 | 19.54321 | Pt | 0 | 0 | 0.00000 |
| HETATM | 191 | Pt | 6.23261  | 7.18278  | 19.54332 | Pt | 0 | 0 | 0.00000 |
| HETATM | 192 | Pt | 6.23244  | 15.55579 | 19.54322 | Pt | 0 | 0 | 0.00000 |
| HETATM | 193 | Pt | 13.48429 | 28.11674 | 19.54327 | Pt | 0 | 0 | 0.00000 |
| HETATM | 194 | Pt | 13.48393 | 11.36954 | 19.54397 | Pt | 0 | 0 | 0.00000 |
| HETATM | 195 | Pt | 13.48468 | 19.74317 | 19.54267 | Pt | 0 | 0 | 0.00000 |
| HETATM | 196 | Pt | 20.73604 | 32.30361 | 19.54315 | Pt | 0 | 0 | 0.00000 |
| HETATM | 197 | Pt | 20.73604 | 15.55623 | 19.54325 | Pt | 0 | 0 | 0.00000 |
| HETATM | 198 | Pt | 20.73606 | 23.92997 | 19.54346 | Pt | 0 | 0 | 0.00000 |
| HETATM | 199 | Pt | 6.23244  | 26.72113 | 19.54322 | Pt | 0 | 0 | 0.00000 |
| HETATM | 200 | Pt | 6.23269  | 9.97401  | 19.54370 | Pt | 0 | 0 | 0.00000 |
| HETATM | 201 | Pt | 6.23267  | 18.34701 | 19.54300 | Pt | 0 | 0 | 0.00000 |
| HETATM | 202 | Pt | 13.48429 | 30.90783 | 19.54328 | Pt | 0 | 0 | 0.00000 |
| HETATM | 203 | Pt | 13.48358 | 14.16047 | 19.54442 | Pt | 0 | 0 | 0.00000 |
| HETATM | 204 | Pt | 13.48431 | 22.53419 | 19.54324 | Pt | 0 | 0 | 0.00000 |
| HETATM | 205 | Pt | 20.73593 | 35.09468 | 19.54314 | Pt | 0 | 0 | 0.00000 |
| HETATM | 206 | Pt | 20.73617 | 18.34735 | 19.54330 | Pt | 0 | 0 | 0.00000 |
| HETATM | 207 | Pt | 20.73606 | 26.72102 | 19.54337 | Pt | 0 | 0 | 0.00000 |
| HETATM | 208 | Pt | 6.23232  | 4.39150  | 19.54439 | Pt | 0 | 0 | 0.00000 |

|        |     |    |          |          |          |    |   |   |         |
|--------|-----|----|----------|----------|----------|----|---|---|---------|
| HETATM | 209 | Pt | 6.23203  | 12.76470 | 19.54452 | Pt | 0 | 0 | 0.00000 |
| HETATM | 210 | Pt | 6.23200  | 21.13897 | 19.54381 | Pt | 0 | 0 | 0.00000 |
| HETATM | 211 | Pt | 13.48398 | 8.57823  | 19.54448 | Pt | 0 | 0 | 0.00000 |
| HETATM | 212 | Pt | 13.48470 | 16.95176 | 19.54326 | Pt | 0 | 0 | 0.00000 |
| HETATM | 213 | Pt | 13.48402 | 25.32545 | 19.54434 | Pt | 0 | 0 | 0.00000 |
| HETATM | 214 | Pt | 20.73565 | 12.76499 | 19.54429 | Pt | 0 | 0 | 0.00000 |
| HETATM | 215 | Pt | 20.73587 | 21.13870 | 19.54449 | Pt | 0 | 0 | 0.00000 |
| HETATM | 216 | Pt | 20.73582 | 29.51231 | 19.54428 | Pt | 0 | 0 | 0.00000 |
| HETATM | 217 | Pt | 8.64998  | 25.32568 | 19.54427 | Pt | 0 | 0 | 0.00000 |
| HETATM | 218 | Pt | 8.65034  | 8.57858  | 19.54486 | Pt | 0 | 0 | 0.00000 |
| HETATM | 219 | Pt | 8.65017  | 16.95087 | 19.54373 | Pt | 0 | 0 | 0.00000 |
| HETATM | 220 | Pt | 15.90185 | 29.51227 | 19.54438 | Pt | 0 | 0 | 0.00000 |
| HETATM | 221 | Pt | 15.90117 | 12.76503 | 19.54484 | Pt | 0 | 0 | 0.00000 |
| HETATM | 222 | Pt | 15.90200 | 21.13870 | 19.54444 | Pt | 0 | 0 | 0.00000 |
| HETATM | 223 | Pt | 1.39826  | 21.13868 | 19.54428 | Pt | 0 | 0 | 0.00000 |
| HETATM | 224 | Pt | 1.39830  | 4.39132  | 19.54437 | Pt | 0 | 0 | 0.00000 |
| HETATM | 225 | Pt | 1.39822  | 12.76503 | 19.54458 | Pt | 0 | 0 | 0.00000 |
| HETATM | 226 | Pt | 8.64996  | 28.11654 | 19.54429 | Pt | 0 | 0 | 0.00000 |
| HETATM | 227 | Pt | 8.65015  | 11.36937 | 19.54561 | Pt | 0 | 0 | 0.00000 |
| HETATM | 228 | Pt | 8.64977  | 19.74299 | 19.54292 | Pt | 0 | 0 | 0.00000 |
| HETATM | 229 | Pt | 15.90170 | 32.30326 | 19.54427 | Pt | 0 | 0 | 0.00000 |
| HETATM | 230 | Pt | 15.90172 | 15.55589 | 19.54433 | Pt | 0 | 0 | 0.00000 |
| HETATM | 231 | Pt | 15.90174 | 23.92961 | 19.54440 | Pt | 0 | 0 | 0.00000 |
| HETATM | 232 | Pt | 1.39806  | 23.92963 | 19.54424 | Pt | 0 | 0 | 0.00000 |
| HETATM | 233 | Pt | 1.39822  | 7.18234  | 19.54439 | Pt | 0 | 0 | 0.00000 |
| HETATM | 234 | Pt | 1.39815  | 15.55599 | 19.54434 | Pt | 0 | 0 | 0.00000 |
| HETATM | 235 | Pt | 8.65003  | 5.78748  | 19.54448 | Pt | 0 | 0 | 0.00000 |
| HETATM | 236 | Pt | 8.64983  | 14.15998 | 19.54504 | Pt | 0 | 0 | 0.00000 |
| HETATM | 237 | Pt | 8.64964  | 22.53491 | 19.54383 | Pt | 0 | 0 | 0.00000 |
| HETATM | 238 | Pt | 15.90154 | 9.97411  | 19.54440 | Pt | 0 | 0 | 0.00000 |
| HETATM | 239 | Pt | 15.90238 | 18.34771 | 19.54396 | Pt | 0 | 0 | 0.00000 |
| HETATM | 240 | Pt | 15.90173 | 26.72132 | 19.54434 | Pt | 0 | 0 | 0.00000 |
| HETATM | 241 | Pt | 1.39810  | 1.60038  | 19.54430 | Pt | 0 | 0 | 0.00000 |
| HETATM | 242 | Pt | 1.39813  | 9.97407  | 19.54448 | Pt | 0 | 0 | 0.00000 |
| HETATM | 243 | Pt | 1.39818  | 18.34774 | 19.54419 | Pt | 0 | 0 | 0.00000 |
| HETATM | 244 | Pt | 2.20428  | 19.74394 | 21.82445 | Pt | 0 | 0 | 0.00000 |
| HETATM | 245 | Pt | 2.20419  | 2.99630  | 21.82471 | Pt | 0 | 0 | 0.00000 |
| HETATM | 246 | Pt | 2.20409  | 11.37025 | 21.82510 | Pt | 0 | 0 | 0.00000 |
| HETATM | 247 | Pt | 9.45591  | 23.93092 | 21.82432 | Pt | 0 | 0 | 0.00000 |
| HETATM | 248 | Pt | 9.45600  | 7.18372  | 21.82530 | Pt | 0 | 0 | 0.00000 |
| HETATM | 249 | Pt | 9.45593  | 15.55438 | 21.82502 | Pt | 0 | 0 | 0.00000 |
| HETATM | 250 | Pt | 16.70779 | 28.11746 | 21.82475 | Pt | 0 | 0 | 0.00000 |
| HETATM | 251 | Pt | 16.70730 | 11.37038 | 21.82505 | Pt | 0 | 0 | 0.00000 |
| HETATM | 252 | Pt | 16.70809 | 19.74402 | 21.82466 | Pt | 0 | 0 | 0.00000 |
| HETATM | 253 | Pt | 2.20416  | 22.53353 | 21.82459 | Pt | 0 | 0 | 0.00000 |
| HETATM | 254 | Pt | 2.20417  | 5.78601  | 21.82465 | Pt | 0 | 0 | 0.00000 |
| HETATM | 255 | Pt | 2.20413  | 14.16008 | 21.82502 | Pt | 0 | 0 | 0.00000 |
| HETATM | 256 | Pt | 9.45598  | 26.72025 | 21.82469 | Pt | 0 | 0 | 0.00000 |
| HETATM | 257 | Pt | 9.45679  | 9.97388  | 21.82650 | Pt | 0 | 0 | 0.00000 |
| HETATM | 258 | Pt | 9.45598  | 18.34671 | 21.81995 | Pt | 0 | 0 | 0.00000 |
| HETATM | 259 | Pt | 16.70782 | 30.90715 | 21.82460 | Pt | 0 | 0 | 0.00000 |
| HETATM | 260 | Pt | 16.70786 | 14.15962 | 21.82448 | Pt | 0 | 0 | 0.00000 |
| HETATM | 261 | Pt | 16.70769 | 22.53355 | 21.82501 | Pt | 0 | 0 | 0.00000 |
| HETATM | 262 | Pt | 2.20499  | 25.32532 | 21.82165 | Pt | 0 | 0 | 0.00000 |
| HETATM | 263 | Pt | 2.20497  | 8.57819  | 21.82188 | Pt | 0 | 0 | 0.00000 |
| HETATM | 264 | Pt | 2.20499  | 16.95209 | 21.82150 | Pt | 0 | 0 | 0.00000 |
| HETATM | 265 | Pt | 9.45681  | 29.51226 | 21.82162 | Pt | 0 | 0 | 0.00000 |
| HETATM | 266 | Pt | 9.45692  | 12.76513 | 21.82627 | Pt | 0 | 0 | 0.00000 |
| HETATM | 267 | Pt | 9.45593  | 21.13952 | 21.81981 | Pt | 0 | 0 | 0.00000 |
| HETATM | 268 | Pt | 16.70852 | 33.69917 | 21.82158 | Pt | 0 | 0 | 0.00000 |
| HETATM | 269 | Pt | 16.70849 | 16.95157 | 21.82198 | Pt | 0 | 0 | 0.00000 |
| HETATM | 270 | Pt | 16.70853 | 25.32550 | 21.82182 | Pt | 0 | 0 | 0.00000 |
| HETATM | 271 | Pt | 4.61987  | 21.13880 | 21.82447 | Pt | 0 | 0 | 0.00000 |

|        |     |    |          |          |          |    |   |   |         |
|--------|-----|----|----------|----------|----------|----|---|---|---------|
| HETATM | 272 | Pt | 4.62021  | 4.39125  | 21.82482 | Pt | 0 | 0 | 0.00000 |
| HETATM | 273 | Pt | 4.61968  | 12.76501 | 21.82490 | Pt | 0 | 0 | 0.00000 |
| HETATM | 274 | Pt | 11.87192 | 25.32538 | 21.82476 | Pt | 0 | 0 | 0.00000 |
| HETATM | 275 | Pt | 11.87196 | 8.57820  | 21.82537 | Pt | 0 | 0 | 0.00000 |
| HETATM | 276 | Pt | 11.87327 | 16.95168 | 21.82076 | Pt | 0 | 0 | 0.00000 |
| HETATM | 277 | Pt | 19.12375 | 29.51236 | 21.82468 | Pt | 0 | 0 | 0.00000 |
| HETATM | 278 | Pt | 19.12355 | 12.76491 | 21.82482 | Pt | 0 | 0 | 0.00000 |
| HETATM | 279 | Pt | 19.12369 | 21.13874 | 21.82511 | Pt | 0 | 0 | 0.00000 |
| HETATM | 280 | Pt | 4.62085  | 23.92965 | 21.82137 | Pt | 0 | 0 | 0.00000 |
| HETATM | 281 | Pt | 4.62092  | 7.18227  | 21.82158 | Pt | 0 | 0 | 0.00000 |
| HETATM | 282 | Pt | 4.62077  | 15.55628 | 21.82138 | Pt | 0 | 0 | 0.00000 |
| HETATM | 283 | Pt | 11.87272 | 28.11641 | 21.82142 | Pt | 0 | 0 | 0.00000 |
| HETATM | 284 | Pt | 11.87269 | 11.36939 | 21.82390 | Pt | 0 | 0 | 0.00000 |
| HETATM | 285 | Pt | 11.87283 | 19.74307 | 21.81905 | Pt | 0 | 0 | 0.00000 |
| HETATM | 286 | Pt | 19.12450 | 32.30339 | 21.82126 | Pt | 0 | 0 | 0.00000 |
| HETATM | 287 | Pt | 19.12446 | 15.55590 | 21.82145 | Pt | 0 | 0 | 0.00000 |
| HETATM | 288 | Pt | 19.12443 | 23.92976 | 21.82177 | Pt | 0 | 0 | 0.00000 |
| HETATM | 289 | Pt | 4.62090  | 26.72115 | 21.82144 | Pt | 0 | 0 | 0.00000 |
| HETATM | 290 | Pt | 4.62114  | 9.97406  | 21.82176 | Pt | 0 | 0 | 0.00000 |
| HETATM | 291 | Pt | 4.62132  | 18.34763 | 21.82125 | Pt | 0 | 0 | 0.00000 |
| HETATM | 292 | Pt | 11.87274 | 30.90805 | 21.82146 | Pt | 0 | 0 | 0.00000 |
| HETATM | 293 | Pt | 11.87124 | 14.16063 | 21.82566 | Pt | 0 | 0 | 0.00000 |
| HETATM | 294 | Pt | 11.87258 | 22.53441 | 21.82112 | Pt | 0 | 0 | 0.00000 |
| HETATM | 295 | Pt | 19.12436 | 35.09497 | 21.82122 | Pt | 0 | 0 | 0.00000 |
| HETATM | 296 | Pt | 19.12455 | 18.34755 | 21.82143 | Pt | 0 | 0 | 0.00000 |
| HETATM | 297 | Pt | 19.12448 | 26.72133 | 21.82161 | Pt | 0 | 0 | 0.00000 |
| HETATM | 298 | Pt | 7.03751  | 22.53542 | 21.82165 | Pt | 0 | 0 | 0.00000 |
| HETATM | 299 | Pt | 7.03778  | 5.78807  | 21.82199 | Pt | 0 | 0 | 0.00000 |
| HETATM | 300 | Pt | 7.03704  | 14.16072 | 21.82220 | Pt | 0 | 0 | 0.00000 |
| HETATM | 301 | Pt | 14.28946 | 26.72210 | 21.82171 | Pt | 0 | 0 | 0.00000 |
| HETATM | 302 | Pt | 14.28938 | 9.97487  | 21.82215 | Pt | 0 | 0 | 0.00000 |
| HETATM | 303 | Pt | 14.29094 | 18.34849 | 21.82015 | Pt | 0 | 0 | 0.00000 |
| HETATM | 304 | Pt | 21.54125 | 30.90911 | 21.82148 | Pt | 0 | 0 | 0.00000 |
| HETATM | 305 | Pt | 21.54114 | 14.16151 | 21.82167 | Pt | 0 | 0 | 0.00000 |
| HETATM | 306 | Pt | 21.54118 | 22.53541 | 21.82209 | Pt | 0 | 0 | 0.00000 |
| HETATM | 307 | Pt | 7.03840  | 25.32547 | 21.82126 | Pt | 0 | 0 | 0.00000 |
| HETATM | 308 | Pt | 7.03850  | 8.57813  | 21.82135 | Pt | 0 | 0 | 0.00000 |
| HETATM | 309 | Pt | 7.03900  | 16.95061 | 21.82082 | Pt | 0 | 0 | 0.00000 |
| HETATM | 310 | Pt | 14.29032 | 29.51224 | 21.82142 | Pt | 0 | 0 | 0.00000 |
| HETATM | 311 | Pt | 14.28879 | 12.76505 | 21.82323 | Pt | 0 | 0 | 0.00000 |
| HETATM | 312 | Pt | 14.29027 | 21.13862 | 21.82134 | Pt | 0 | 0 | 0.00000 |
| HETATM | 313 | Pt | 21.54206 | 33.69921 | 21.82114 | Pt | 0 | 0 | 0.00000 |
| HETATM | 314 | Pt | 21.54209 | 16.95164 | 21.82138 | Pt | 0 | 0 | 0.00000 |
| HETATM | 315 | Pt | 21.54203 | 25.32559 | 21.82179 | Pt | 0 | 0 | 0.00000 |
| HETATM | 316 | Pt | 7.03770  | 28.11549 | 21.82166 | Pt | 0 | 0 | 0.00000 |
| HETATM | 317 | Pt | 7.03818  | 11.36944 | 21.82338 | Pt | 0 | 0 | 0.00000 |
| HETATM | 318 | Pt | 7.03708  | 19.74306 | 21.81962 | Pt | 0 | 0 | 0.00000 |
| HETATM | 319 | Pt | 14.28948 | 32.30245 | 21.82174 | Pt | 0 | 0 | 0.00000 |
| HETATM | 320 | Pt | 14.28943 | 15.55519 | 21.82172 | Pt | 0 | 0 | 0.00000 |
| HETATM | 321 | Pt | 14.28940 | 23.92876 | 21.82176 | Pt | 0 | 0 | 0.00000 |
| HETATM | 322 | Pt | 21.54117 | 36.48922 | 21.82148 | Pt | 0 | 0 | 0.00000 |
| HETATM | 323 | Pt | 21.54120 | 19.74196 | 21.82189 | Pt | 0 | 0 | 0.00000 |
| HETATM | 324 | Pt | 21.54124 | 28.11575 | 21.82173 | Pt | 0 | 0 | 0.00000 |
| HETATM | 325 | Pt | 3.00967  | 21.13873 | 24.11167 | Pt | 0 | 0 | 0.00000 |
| HETATM | 326 | Pt | 3.00945  | 4.39082  | 24.11165 | Pt | 0 | 0 | 0.00000 |
| HETATM | 327 | Pt | 3.00948  | 12.76556 | 24.11235 | Pt | 0 | 0 | 0.00000 |
| HETATM | 328 | Pt | 10.26133 | 25.32487 | 24.11182 | Pt | 0 | 0 | 0.00000 |
| HETATM | 329 | Pt | 10.26064 | 8.57849  | 24.11302 | Pt | 0 | 0 | 0.00000 |
| HETATM | 330 | Pt | 10.26306 | 16.95011 | 24.09985 | Pt | 0 | 0 | 0.00000 |
| HETATM | 331 | Pt | 17.51319 | 29.51235 | 24.11165 | Pt | 0 | 0 | 0.00000 |
| HETATM | 332 | Pt | 17.51332 | 12.76489 | 24.11249 | Pt | 0 | 0 | 0.00000 |
| HETATM | 333 | Pt | 17.51240 | 21.13864 | 24.11234 | Pt | 0 | 0 | 0.00000 |
| HETATM | 334 | Pt | 3.01128  | 23.92740 | 24.10205 | Pt | 0 | 0 | 0.00000 |



|        |     |    |          |          |          |    |   |   |         |
|--------|-----|----|----------|----------|----------|----|---|---|---------|
| HETATM | 335 | Pt | 3.01046  | 7.17998  | 24.10182 | Pt | 0 | 0 | 0.00000 |
| HETATM | 336 | Pt | 3.01079  | 15.55518 | 24.10210 | Pt | 0 | 0 | 0.00000 |
| HETATM | 337 | Pt | 10.26271 | 28.11394 | 24.10182 | Pt | 0 | 0 | 0.00000 |
| HETATM | 338 | Pt | 10.26551 | 11.36956 | 24.10805 | Pt | 0 | 0 | 0.00000 |
| HETATM | 339 | Pt | 10.26015 | 19.74327 | 24.09547 | Pt | 0 | 0 | 0.00000 |
| HETATM | 340 | Pt | 17.51472 | 32.30152 | 24.10173 | Pt | 0 | 0 | 0.00000 |
| HETATM | 341 | Pt | 17.51452 | 15.55443 | 24.10205 | Pt | 0 | 0 | 0.00000 |
| HETATM | 342 | Pt | 17.51418 | 23.92783 | 24.10227 | Pt | 0 | 0 | 0.00000 |
| HETATM | 343 | Pt | 3.01103  | 26.72261 | 24.10199 | Pt | 0 | 0 | 0.00000 |
| HETATM | 344 | Pt | 3.01069  | 9.97589  | 24.10222 | Pt | 0 | 0 | 0.00000 |
| HETATM | 345 | Pt | 3.01088  | 18.35006 | 24.10150 | Pt | 0 | 0 | 0.00000 |
| HETATM | 346 | Pt | 10.26269 | 30.90940 | 24.10179 | Pt | 0 | 0 | 0.00000 |
| HETATM | 347 | Pt | 10.26079 | 14.16091 | 24.11476 | Pt | 0 | 0 | 0.00000 |
| HETATM | 348 | Pt | 10.26302 | 22.53647 | 24.10118 | Pt | 0 | 0 | 0.00000 |
| HETATM | 349 | Pt | 17.51486 | 35.09677 | 24.10168 | Pt | 0 | 0 | 0.00000 |
| HETATM | 350 | Pt | 17.51411 | 18.34940 | 24.10144 | Pt | 0 | 0 | 0.00000 |
| HETATM | 351 | Pt | 17.51443 | 26.72316 | 24.10213 | Pt | 0 | 0 | 0.00000 |
| HETATM | 352 | Pt | 5.42465  | 22.53409 | 24.10163 | Pt | 0 | 0 | 0.00000 |
| HETATM | 353 | Pt | 5.42425  | 5.78673  | 24.10228 | Pt | 0 | 0 | 0.00000 |
| HETATM | 354 | Pt | 5.42294  | 14.16221 | 24.10193 | Pt | 0 | 0 | 0.00000 |
| HETATM | 355 | Pt | 12.67606 | 26.72093 | 24.10196 | Pt | 0 | 0 | 0.00000 |
| HETATM | 356 | Pt | 12.67646 | 9.97341  | 24.10315 | Pt | 0 | 0 | 0.00000 |
| HETATM | 357 | Pt | 12.67902 | 18.34794 | 24.09587 | Pt | 0 | 0 | 0.00000 |
| HETATM | 358 | Pt | 19.92798 | 30.90831 | 24.10180 | Pt | 0 | 0 | 0.00000 |
| HETATM | 359 | Pt | 19.92773 | 14.16071 | 24.10207 | Pt | 0 | 0 | 0.00000 |
| HETATM | 360 | Pt | 19.92743 | 22.53451 | 24.10252 | Pt | 0 | 0 | 0.00000 |
| HETATM | 361 | Pt | 5.42686  | 25.32499 | 24.09697 | Pt | 0 | 0 | 0.00000 |
| HETATM | 362 | Pt | 5.42616  | 8.57763  | 24.09750 | Pt | 0 | 0 | 0.00000 |
| HETATM | 363 | Pt | 5.42778  | 16.95292 | 24.09684 | Pt | 0 | 0 | 0.00000 |
| HETATM | 364 | Pt | 12.67861 | 29.51195 | 24.09699 | Pt | 0 | 0 | 0.00000 |
| HETATM | 365 | Pt | 12.67543 | 12.76527 | 24.10336 | Pt | 0 | 0 | 0.00000 |
| HETATM | 366 | Pt | 12.67784 | 21.13814 | 24.09651 | Pt | 0 | 0 | 0.00000 |
| HETATM | 367 | Pt | 19.93063 | 33.69920 | 24.09664 | Pt | 0 | 0 | 0.00000 |
| HETATM | 368 | Pt | 19.93038 | 16.95169 | 24.09687 | Pt | 0 | 0 | 0.00000 |
| HETATM | 369 | Pt | 19.93019 | 25.32562 | 24.09744 | Pt | 0 | 0 | 0.00000 |
| HETATM | 370 | Pt | 5.42434  | 28.11590 | 24.10201 | Pt | 0 | 0 | 0.00000 |
| HETATM | 371 | Pt | 5.42478  | 11.36928 | 24.10196 | Pt | 0 | 0 | 0.00000 |
| HETATM | 372 | Pt | 5.42371  | 19.74294 | 24.10188 | Pt | 0 | 0 | 0.00000 |
| HETATM | 373 | Pt | 12.67613 | 32.30305 | 24.10213 | Pt | 0 | 0 | 0.00000 |
| HETATM | 374 | Pt | 12.67595 | 15.55738 | 24.10197 | Pt | 0 | 0 | 0.00000 |
| HETATM | 375 | Pt | 12.67600 | 23.92935 | 24.10205 | Pt | 0 | 0 | 0.00000 |
| HETATM | 376 | Pt | 19.92812 | 36.49001 | 24.10171 | Pt | 0 | 0 | 0.00000 |
| HETATM | 377 | Pt | 19.92738 | 19.74276 | 24.10229 | Pt | 0 | 0 | 0.00000 |
| HETATM | 378 | Pt | 19.92785 | 28.11667 | 24.10205 | Pt | 0 | 0 | 0.00000 |
| HETATM | 379 | Pt | 7.84511  | 23.93163 | 24.10131 | Pt | 0 | 0 | 0.00000 |
| HETATM | 380 | Pt | 7.84504  | 7.18448  | 24.10304 | Pt | 0 | 0 | 0.00000 |
| HETATM | 381 | Pt | 7.84510  | 15.55367 | 24.10255 | Pt | 0 | 0 | 0.00000 |
| HETATM | 382 | Pt | 15.09692 | 28.11883 | 24.10200 | Pt | 0 | 0 | 0.00000 |
| HETATM | 383 | Pt | 15.09703 | 11.37225 | 24.10270 | Pt | 0 | 0 | 0.00000 |
| HETATM | 384 | Pt | 15.09643 | 19.74580 | 24.10180 | Pt | 0 | 0 | 0.00000 |
| HETATM | 385 | Pt | 0.59339  | 19.74562 | 24.10150 | Pt | 0 | 0 | 0.00000 |
| HETATM | 386 | Pt | 0.59328  | 2.99759  | 24.10192 | Pt | 0 | 0 | 0.00000 |
| HETATM | 387 | Pt | 0.59316  | 11.37190 | 24.10259 | Pt | 0 | 0 | 0.00000 |
| HETATM | 388 | Pt | 7.84514  | 26.71801 | 24.10194 | Pt | 0 | 0 | 0.00000 |
| HETATM | 389 | Pt | 7.84384  | 9.97009  | 24.09994 | Pt | 0 | 0 | 0.00000 |
| HETATM | 390 | Pt | 7.84335  | 18.34962 | 24.09424 | Pt | 0 | 0 | 0.00000 |
| HETATM | 391 | Pt | 15.09706 | 30.90555 | 24.10179 | Pt | 0 | 0 | 0.00000 |
| HETATM | 392 | Pt | 15.09871 | 14.15797 | 24.10049 | Pt | 0 | 0 | 0.00000 |
| HETATM | 393 | Pt | 15.09638 | 22.53197 | 24.10224 | Pt | 0 | 0 | 0.00000 |
| HETATM | 394 | Pt | 0.59358  | 22.53200 | 24.10165 | Pt | 0 | 0 | 0.00000 |
| HETATM | 395 | Pt | 0.59309  | 5.78437  | 24.10186 | Pt | 0 | 0 | 0.00000 |
| HETATM | 396 | Pt | 0.59325  | 14.15878 | 24.10228 | Pt | 0 | 0 | 0.00000 |
| HETATM | 397 | Pt | 7.84400  | 29.51152 | 24.09146 | Pt | 0 | 0 | 0.00000 |

|        |     |    |          |          |          |    |   |   |         |
|--------|-----|----|----------|----------|----------|----|---|---|---------|
| HETATM | 398 | Pt | 7.84572  | 12.77006 | 24.09788 | Pt | 0 | 0 | 0.00000 |
| HETATM | 399 | Pt | 7.84465  | 21.13766 | 24.09274 | Pt | 0 | 0 | 0.00000 |
| HETATM | 400 | Pt | 15.09604 | 33.69919 | 24.09170 | Pt | 0 | 0 | 0.00000 |
| HETATM | 401 | Pt | 15.09433 | 16.95122 | 24.09306 | Pt | 0 | 0 | 0.00000 |
| HETATM | 402 | Pt | 15.09571 | 25.32542 | 24.09168 | Pt | 0 | 0 | 0.00000 |
| HETATM | 403 | Pt | 0.59243  | 25.32518 | 24.09139 | Pt | 0 | 0 | 0.00000 |
| HETATM | 404 | Pt | 0.59189  | 8.57817  | 24.09197 | Pt | 0 | 0 | 0.00000 |
| HETATM | 405 | Pt | 0.59219  | 16.95224 | 24.09141 | Pt | 0 | 0 | 0.00000 |
| HETATM | 406 | Pt | 3.81496  | 22.52967 | 26.40062 | Pt | 0 | 0 | 0.00000 |
| HETATM | 407 | Pt | 3.81285  | 5.78252  | 26.40028 | Pt | 0 | 0 | 0.00000 |
| HETATM | 408 | Pt | 3.81433  | 14.15962 | 26.40102 | Pt | 0 | 0 | 0.00000 |
| HETATM | 409 | Pt | 11.06492 | 26.71553 | 26.40029 | Pt | 0 | 0 | 0.00000 |
| HETATM | 410 | Pt | 11.06253 | 9.96798  | 26.40154 | Pt | 0 | 0 | 0.00000 |
| HETATM | 411 | Pt | 11.06402 | 18.35109 | 26.36986 | Pt | 0 | 0 | 0.00000 |
| HETATM | 412 | Pt | 18.31729 | 30.90434 | 26.40020 | Pt | 0 | 0 | 0.00000 |
| HETATM | 413 | Pt | 18.31617 | 14.15797 | 26.40086 | Pt | 0 | 0 | 0.00000 |
| HETATM | 414 | Pt | 18.31529 | 22.53035 | 26.40087 | Pt | 0 | 0 | 0.00000 |
| HETATM | 415 | Pt | 3.81231  | 25.32458 | 26.37186 | Pt | 0 | 0 | 0.00000 |
| HETATM | 416 | Pt | 3.81001  | 8.57685  | 26.37146 | Pt | 0 | 0 | 0.00000 |
| HETATM | 417 | Pt | 3.81083  | 16.95440 | 26.37147 | Pt | 0 | 0 | 0.00000 |
| HETATM | 418 | Pt | 11.06365 | 29.51020 | 26.37139 | Pt | 0 | 0 | 0.00000 |
| HETATM | 419 | Pt | 11.06377 | 12.77201 | 26.40312 | Pt | 0 | 0 | 0.00000 |
| HETATM | 420 | Pt | 11.06475 | 21.13635 | 26.37167 | Pt | 0 | 0 | 0.00000 |
| HETATM | 421 | Pt | 18.31681 | 33.69882 | 26.37133 | Pt | 0 | 0 | 0.00000 |
| HETATM | 422 | Pt | 18.31602 | 16.95264 | 26.37122 | Pt | 0 | 0 | 0.00000 |
| HETATM | 423 | Pt | 18.31488 | 25.32527 | 26.37203 | Pt | 0 | 0 | 0.00000 |
| HETATM | 424 | Pt | 3.81330  | 2.99839  | 26.40033 | Pt | 0 | 0 | 0.00000 |
| HETATM | 425 | Pt | 3.81175  | 11.37309 | 26.40036 | Pt | 0 | 0 | 0.00000 |
| HETATM | 426 | Pt | 3.81455  | 19.74666 | 26.40077 | Pt | 0 | 0 | 0.00000 |
| HETATM | 427 | Pt | 11.06527 | 7.18375  | 26.39985 | Pt | 0 | 0 | 0.00000 |
| HETATM | 428 | Pt | 11.06514 | 15.55825 | 26.40103 | Pt | 0 | 0 | 0.00000 |
| HETATM | 429 | Pt | 11.06484 | 23.93105 | 26.40090 | Pt | 0 | 0 | 0.00000 |
| HETATM | 430 | Pt | 18.31785 | 11.37289 | 26.40033 | Pt | 0 | 0 | 0.00000 |
| HETATM | 431 | Pt | 18.31533 | 19.74646 | 26.40072 | Pt | 0 | 0 | 0.00000 |
| HETATM | 432 | Pt | 18.31681 | 28.12013 | 26.40041 | Pt | 0 | 0 | 0.00000 |
| HETATM | 433 | Pt | 6.23470  | 23.92596 | 26.37132 | Pt | 0 | 0 | 0.00000 |
| HETATM | 434 | Pt | 6.23389  | 7.17887  | 26.37268 | Pt | 0 | 0 | 0.00000 |
| HETATM | 435 | Pt | 6.23425  | 15.56214 | 26.37192 | Pt | 0 | 0 | 0.00000 |
| HETATM | 436 | Pt | 13.48597 | 28.11264 | 26.37167 | Pt | 0 | 0 | 0.00000 |
| HETATM | 437 | Pt | 13.49034 | 11.36636 | 26.37156 | Pt | 0 | 0 | 0.00000 |
| HETATM | 438 | Pt | 13.48069 | 19.74003 | 26.37246 | Pt | 0 | 0 | 0.00000 |
| HETATM | 439 | Pt | 20.73847 | 32.30084 | 26.37139 | Pt | 0 | 0 | 0.00000 |
| HETATM | 440 | Pt | 20.73779 | 15.55303 | 26.37173 | Pt | 0 | 0 | 0.00000 |
| HETATM | 441 | Pt | 20.73697 | 23.92704 | 26.37228 | Pt | 0 | 0 | 0.00000 |
| HETATM | 442 | Pt | 6.23440  | 26.72280 | 26.37176 | Pt | 0 | 0 | 0.00000 |
| HETATM | 443 | Pt | 6.23080  | 9.97527  | 26.37395 | Pt | 0 | 0 | 0.00000 |
| HETATM | 444 | Pt | 6.23529  | 18.34941 | 26.37469 | Pt | 0 | 0 | 0.00000 |
| HETATM | 445 | Pt | 13.48658 | 30.90975 | 26.37151 | Pt | 0 | 0 | 0.00000 |
| HETATM | 446 | Pt | 13.49526 | 14.16488 | 26.36349 | Pt | 0 | 0 | 0.00000 |
| HETATM | 447 | Pt | 13.48504 | 22.53660 | 26.37211 | Pt | 0 | 0 | 0.00000 |
| HETATM | 448 | Pt | 20.73877 | 35.09760 | 26.37131 | Pt | 0 | 0 | 0.00000 |
| HETATM | 449 | Pt | 20.73751 | 18.35023 | 26.37163 | Pt | 0 | 0 | 0.00000 |
| HETATM | 450 | Pt | 20.73754 | 26.72437 | 26.37206 | Pt | 0 | 0 | 0.00000 |
| HETATM | 451 | Pt | 6.24121  | 4.39023  | 26.36934 | Pt | 0 | 0 | 0.00000 |
| HETATM | 452 | Pt | 6.24104  | 12.76490 | 26.36456 | Pt | 0 | 0 | 0.00000 |
| HETATM | 453 | Pt | 6.24361  | 21.13729 | 26.36743 | Pt | 0 | 0 | 0.00000 |
| HETATM | 454 | Pt | 13.49348 | 8.57783  | 26.36985 | Pt | 0 | 0 | 0.00000 |
| HETATM | 455 | Pt | 13.48478 | 16.95346 | 26.37649 | Pt | 0 | 0 | 0.00000 |
| HETATM | 456 | Pt | 13.49285 | 25.32453 | 26.36934 | Pt | 0 | 0 | 0.00000 |
| HETATM | 457 | Pt | 20.74538 | 12.76496 | 26.36880 | Pt | 0 | 0 | 0.00000 |
| HETATM | 458 | Pt | 20.74376 | 21.13848 | 26.36977 | Pt | 0 | 0 | 0.00000 |
| HETATM | 459 | Pt | 20.74496 | 29.51268 | 26.36921 | Pt | 0 | 0 | 0.00000 |
| HETATM | 460 | Pt | 8.65402  | 25.32324 | 26.40045 | Pt | 0 | 0 | 0.00000 |

|        |     |    |          |          |          |    |   |   |         |
|--------|-----|----|----------|----------|----------|----|---|---|---------|
| HETATM | 461 | Pt | 8.65364  | 8.57698  | 26.40480 | Pt | 0 | 0 | 0.00000 |
| HETATM | 462 | Pt | 8.64572  | 16.96423 | 26.36316 | Pt | 0 | 0 | 0.00000 |
| HETATM | 463 | Pt | 15.90596 | 29.51185 | 26.40024 | Pt | 0 | 0 | 0.00000 |
| HETATM | 464 | Pt | 15.90690 | 12.76487 | 26.40414 | Pt | 0 | 0 | 0.00000 |
| HETATM | 465 | Pt | 15.90281 | 21.13773 | 26.40134 | Pt | 0 | 0 | 0.00000 |
| HETATM | 466 | Pt | 1.40309  | 21.13865 | 26.40000 | Pt | 0 | 0 | 0.00000 |
| HETATM | 467 | Pt | 1.40191  | 4.39071  | 26.40018 | Pt | 0 | 0 | 0.00000 |
| HETATM | 468 | Pt | 1.40183  | 12.76596 | 26.40089 | Pt | 0 | 0 | 0.00000 |
| HETATM | 469 | Pt | 8.64533  | 28.12235 | 26.36908 | Pt | 0 | 0 | 0.00000 |
| HETATM | 470 | Pt | 8.63778  | 11.36949 | 26.35481 | Pt | 0 | 0 | 0.00000 |
| HETATM | 471 | Pt | 8.65169  | 19.74303 | 26.37969 | Pt | 0 | 0 | 0.00000 |
| HETATM | 472 | Pt | 15.89782 | 32.31086 | 26.36886 | Pt | 0 | 0 | 0.00000 |
| HETATM | 473 | Pt | 15.89766 | 15.56652 | 26.37004 | Pt | 0 | 0 | 0.00000 |
| HETATM | 474 | Pt | 15.89624 | 23.93707 | 26.36950 | Pt | 0 | 0 | 0.00000 |
| HETATM | 475 | Pt | 1.39439  | 23.93702 | 26.36912 | Pt | 0 | 0 | 0.00000 |
| HETATM | 476 | Pt | 1.39262  | 7.18953  | 26.36917 | Pt | 0 | 0 | 0.00000 |
| HETATM | 477 | Pt | 1.39357  | 15.56489 | 26.36946 | Pt | 0 | 0 | 0.00000 |
| HETATM | 478 | Pt | 8.64514  | 5.77727  | 26.36892 | Pt | 0 | 0 | 0.00000 |
| HETATM | 479 | Pt | 8.65396  | 14.16526 | 26.40928 | Pt | 0 | 0 | 0.00000 |
| HETATM | 480 | Pt | 8.64555  | 22.52456 | 26.36650 | Pt | 0 | 0 | 0.00000 |
| HETATM | 481 | Pt | 15.89949 | 9.96547  | 26.36913 | Pt | 0 | 0 | 0.00000 |
| HETATM | 482 | Pt | 15.89569 | 18.33979 | 26.36628 | Pt | 0 | 0 | 0.00000 |
| HETATM | 483 | Pt | 15.89703 | 26.71314 | 26.36952 | Pt | 0 | 0 | 0.00000 |
| HETATM | 484 | Pt | 1.39382  | 1.59193  | 26.36923 | Pt | 0 | 0 | 0.00000 |
| HETATM | 485 | Pt | 1.39262  | 9.96624  | 26.36999 | Pt | 0 | 0 | 0.00000 |
| HETATM | 486 | Pt | 1.39348  | 18.34070 | 26.36873 | Pt | 0 | 0 | 0.00000 |
| HETATM | 487 | Pt | 2.21247  | 19.75313 | 28.73745 | Pt | 0 | 0 | 0.00000 |
| HETATM | 488 | Pt | 2.20951  | 3.00481  | 28.73766 | Pt | 0 | 0 | 0.00000 |
| HETATM | 489 | Pt | 2.20514  | 11.37978 | 28.73913 | Pt | 0 | 0 | 0.00000 |
| HETATM | 490 | Pt | 9.46102  | 23.93419 | 28.73845 | Pt | 0 | 0 | 0.00000 |
| HETATM | 491 | Pt | 9.46111  | 7.18421  | 28.73575 | Pt | 0 | 0 | 0.00000 |
| HETATM | 492 | Pt | 9.46077  | 15.56250 | 28.73924 | Pt | 0 | 0 | 0.00000 |
| HETATM | 493 | Pt | 16.71329 | 28.12523 | 28.73833 | Pt | 0 | 0 | 0.00000 |
| HETATM | 494 | Pt | 16.71653 | 11.37940 | 28.73999 | Pt | 0 | 0 | 0.00000 |
| HETATM | 495 | Pt | 16.70993 | 19.75273 | 28.73793 | Pt | 0 | 0 | 0.00000 |
| HETATM | 496 | Pt | 2.21274  | 22.52318 | 28.73735 | Pt | 0 | 0 | 0.00000 |
| HETATM | 497 | Pt | 2.20901  | 5.77603  | 28.73786 | Pt | 0 | 0 | 0.00000 |
| HETATM | 498 | Pt | 2.20736  | 14.15352 | 28.73763 | Pt | 0 | 0 | 0.00000 |
| HETATM | 499 | Pt | 9.46126  | 26.70684 | 28.73780 | Pt | 0 | 0 | 0.00000 |
| HETATM | 500 | Pt | 9.47030  | 9.94881  | 28.76384 | Pt | 0 | 0 | 0.00000 |
| HETATM | 501 | Pt | 9.46558  | 18.36102 | 28.67304 | Pt | 0 | 0 | 0.00000 |
| HETATM | 502 | Pt | 16.71451 | 30.89642 | 28.73734 | Pt | 0 | 0 | 0.00000 |
| HETATM | 503 | Pt | 16.70940 | 14.15404 | 28.74081 | Pt | 0 | 0 | 0.00000 |
| HETATM | 504 | Pt | 16.70955 | 22.52301 | 28.73778 | Pt | 0 | 0 | 0.00000 |
| HETATM | 505 | Pt | 2.21509  | 25.32476 | 28.69204 | Pt | 0 | 0 | 0.00000 |
| HETATM | 506 | Pt | 2.21130  | 8.57681  | 28.69193 | Pt | 0 | 0 | 0.00000 |
| HETATM | 507 | Pt | 2.21618  | 16.95446 | 28.69211 | Pt | 0 | 0 | 0.00000 |
| HETATM | 508 | Pt | 9.46646  | 29.50812 | 28.69173 | Pt | 0 | 0 | 0.00000 |
| HETATM | 509 | Pt | 9.46622  | 12.79425 | 28.76526 | Pt | 0 | 0 | 0.00000 |
| HETATM | 510 | Pt | 9.46000  | 21.12752 | 28.67403 | Pt | 0 | 0 | 0.00000 |
| HETATM | 511 | Pt | 16.72159 | 33.69711 | 28.69162 | Pt | 0 | 0 | 0.00000 |
| HETATM | 512 | Pt | 16.72207 | 16.95615 | 28.69107 | Pt | 0 | 0 | 0.00000 |
| HETATM | 513 | Pt | 16.71649 | 25.32367 | 28.69215 | Pt | 0 | 0 | 0.00000 |
| HETATM | 514 | Pt | 4.61523  | 21.13589 | 28.73921 | Pt | 0 | 0 | 0.00000 |
| HETATM | 515 | Pt | 4.60933  | 4.39028  | 28.73793 | Pt | 0 | 0 | 0.00000 |
| HETATM | 516 | Pt | 4.60214  | 12.76613 | 28.73514 | Pt | 0 | 0 | 0.00000 |
| HETATM | 517 | Pt | 11.86060 | 25.32090 | 28.73779 | Pt | 0 | 0 | 0.00000 |
| HETATM | 518 | Pt | 11.86683 | 8.56886  | 28.73743 | Pt | 0 | 0 | 0.00000 |
| HETATM | 519 | Pt | 11.88325 | 16.98397 | 28.63929 | Pt | 0 | 0 | 0.00000 |
| HETATM | 520 | Pt | 19.11382 | 29.51176 | 28.73787 | Pt | 0 | 0 | 0.00000 |
| HETATM | 521 | Pt | 19.11262 | 12.76728 | 28.73626 | Pt | 0 | 0 | 0.00000 |
| HETATM | 522 | Pt | 19.11046 | 21.13840 | 28.73860 | Pt | 0 | 0 | 0.00000 |
| HETATM | 523 | Pt | 4.63136  | 23.94522 | 28.63830 | Pt | 0 | 0 | 0.00000 |

|                      |     |    |          |          |          |    |   |   |         |
|----------------------|-----|----|----------|----------|----------|----|---|---|---------|
| HETATM               | 524 | Pt | 4.62946  | 7.19766  | 28.63812 | Pt | 0 | 0 | 0.00000 |
| HETATM               | 525 | Pt | 4.63065  | 15.57908 | 28.63838 | Pt | 0 | 0 | 0.00000 |
| HETATM               | 526 | Pt | 11.88233 | 28.12891 | 28.63798 | Pt | 0 | 0 | 0.00000 |
| HETATM               | 527 | Pt | 11.89419 | 11.36879 | 28.62466 | Pt | 0 | 0 | 0.00000 |
| HETATM               | 528 | Pt | 11.86916 | 19.74388 | 28.65461 | Pt | 0 | 0 | 0.00000 |
| HETATM               | 529 | Pt | 19.13604 | 32.31927 | 28.63792 | Pt | 0 | 0 | 0.00000 |
| HETATM               | 530 | Pt | 19.13425 | 15.57333 | 28.63809 | Pt | 0 | 0 | 0.00000 |
| HETATM               | 531 | Pt | 19.13208 | 23.94554 | 28.63853 | Pt | 0 | 0 | 0.00000 |
| HETATM               | 532 | Pt | 4.63074  | 26.70377 | 28.63816 | Pt | 0 | 0 | 0.00000 |
| HETATM               | 533 | Pt | 4.62280  | 9.95433  | 28.63867 | Pt | 0 | 0 | 0.00000 |
| HETATM               | 534 | Pt | 4.63874  | 18.33318 | 28.63931 | Pt | 0 | 0 | 0.00000 |
| HETATM               | 535 | Pt | 11.88376 | 30.88602 | 28.63729 | Pt | 0 | 0 | 0.00000 |
| HETATM               | 536 | Pt | 11.86300 | 14.17587 | 28.73481 | Pt | 0 | 0 | 0.00000 |
| HETATM               | 537 | Pt | 11.87772 | 22.50927 | 28.63884 | Pt | 0 | 0 | 0.00000 |
| HETATM               | 538 | Pt | 19.13598 | 35.07843 | 28.63768 | Pt | 0 | 0 | 0.00000 |
| HETATM               | 539 | Pt | 19.13481 | 18.33243 | 28.63825 | Pt | 0 | 0 | 0.00000 |
| HETATM               | 540 | Pt | 19.13314 | 26.70417 | 28.63828 | Pt | 0 | 0 | 0.00000 |
| HETATM               | 541 | Pt | 7.03355  | 22.54249 | 28.69032 | Pt | 0 | 0 | 0.00000 |
| HETATM               | 542 | Pt | 7.03236  | 5.79471  | 28.69219 | Pt | 0 | 0 | 0.00000 |
| HETATM               | 543 | Pt | 7.01711  | 14.17405 | 28.65671 | Pt | 0 | 0 | 0.00000 |
| HETATM               | 544 | Pt | 14.28416 | 26.72713 | 28.69200 | Pt | 0 | 0 | 0.00000 |
| HETATM               | 545 | Pt | 14.29182 | 9.97740  | 28.69186 | Pt | 0 | 0 | 0.00000 |
| HETATM               | 546 | Pt | 14.28068 | 18.35413 | 28.67327 | Pt | 0 | 0 | 0.00000 |
| HETATM               | 547 | Pt | 21.53789 | 30.91763 | 28.69175 | Pt | 0 | 0 | 0.00000 |
| HETATM               | 548 | Pt | 21.53674 | 14.16989 | 28.69211 | Pt | 0 | 0 | 0.00000 |
| HETATM               | 549 | Pt | 21.53385 | 22.54316 | 28.69243 | Pt | 0 | 0 | 0.00000 |
| HETATM               | 550 | Pt | 7.01978  | 25.32400 | 28.63818 | Pt | 0 | 0 | 0.00000 |
| HETATM               | 551 | Pt | 7.01889  | 8.57788  | 28.64056 | Pt | 0 | 0 | 0.00000 |
| HETATM               | 552 | Pt | 7.03488  | 16.95708 | 28.67186 | Pt | 0 | 0 | 0.00000 |
| HETATM               | 553 | Pt | 14.27214 | 29.50879 | 28.63794 | Pt | 0 | 0 | 0.00000 |
| HETATM               | 554 | Pt | 14.27435 | 12.76181 | 28.65440 | Pt | 0 | 0 | 0.00000 |
| HETATM               | 555 | Pt | 14.26421 | 21.13313 | 28.63901 | Pt | 0 | 0 | 0.00000 |
| HETATM               | 556 | Pt | 21.52502 | 33.69923 | 28.63772 | Pt | 0 | 0 | 0.00000 |
| HETATM               | 557 | Pt | 21.52303 | 16.95172 | 28.63798 | Pt | 0 | 0 | 0.00000 |
| HETATM               | 558 | Pt | 21.52127 | 25.32572 | 28.63851 | Pt | 0 | 0 | 0.00000 |
| HETATM               | 559 | Pt | 7.03300  | 28.10575 | 28.69190 | Pt | 0 | 0 | 0.00000 |
| HETATM               | 560 | Pt | 7.01215  | 11.35760 | 28.70741 | Pt | 0 | 0 | 0.00000 |
| HETATM               | 561 | Pt | 7.05222  | 19.73240 | 28.67468 | Pt | 0 | 0 | 0.00000 |
| HETATM               | 562 | Pt | 14.28760 | 32.28975 | 28.69179 | Pt | 0 | 0 | 0.00000 |
| HETATM               | 563 | Pt | 14.28470 | 15.57901 | 28.69146 | Pt | 0 | 0 | 0.00000 |
| HETATM               | 564 | Pt | 14.28160 | 23.91618 | 28.69259 | Pt | 0 | 0 | 0.00000 |
| HETATM               | 565 | Pt | 21.53740 | 36.48114 | 28.69163 | Pt | 0 | 0 | 0.00000 |
| HETATM               | 566 | Pt | 21.53545 | 19.73359 | 28.69207 | Pt | 0 | 0 | 0.00000 |
| HETATM               | 567 | Pt | 21.53620 | 28.10811 | 28.69218 | Pt | 0 | 0 | 0.00000 |
| HETATM               | 568 | O  | 3.01084  | 21.13820 | 29.85792 | O  | 0 | 0 | 0.00000 |
| HETATM               | 569 | O  | 3.00918  | 4.39019  | 29.85788 | O  | 0 | 0 | 0.00000 |
| HETATM               | 570 | O  | 3.00853  | 12.76754 | 29.85752 | O  | 0 | 0 | 0.00000 |
| HETATM               | 571 | O  | 10.26143 | 25.32212 | 29.85804 | O  | 0 | 0 | 0.00000 |
| HETATM               | 572 | O  | 10.26597 | 8.56403  | 29.86408 | O  | 0 | 0 | 0.00000 |
| HETATM               | 573 | O  | 10.26924 | 14.17774 | 29.86487 | O  | 0 | 0 | 0.00000 |
| HETATM               | 574 | O  | 17.51372 | 29.51201 | 29.85792 | O  | 0 | 0 | 0.00000 |
| HETATM               | 575 | O  | 17.51798 | 12.76507 | 29.85891 | O  | 0 | 0 | 0.00000 |
| HETATM               | 576 | O  | 17.50987 | 21.13838 | 29.85816 | O  | 0 | 0 | 0.00000 |
| UNIT ENERGY kcal     |     |    |          |          |          |    |   |   |         |
| ENERGY -73581.982022 |     |    |          |          |          |    |   |   |         |
| END                  |     |    |          |          |          |    |   |   |         |
