# Supplementary material for: Development of a ReaxFF potential for Pt–O systems describing the energetics and dynamics of Pt-oxide formation
Source: Royal Society of Chemistry journal article supplement (doi:10.1039/c4cp03111c), 2014-01-01
Supplement: c4cp03111c1.zip [file c4cp03111c1.zip]

```

XTLGRF 200
DESCRP IS
REMARK Pt111_0.50ML_8x8x7_30.0_vac hcp-displacement
FIXATOMS      1      128
CRYSTX      22.32968      22.32968      43.67409      90.00000      90.00000      60.00000
FORMAT ATOM      (a6,lx,i5,lx,a5,lx,a3,lx,a1,lx,a5,3f10.5,lx,a5,i3,i2,lx,f8.5)
HETATM      1 Pt      2.02016      17.64733      14.95089      Pt      0 0      0.00000
HETATM      2 Pt      2.02016      20.43854      14.95089      Pt      0 0      0.00000
HETATM      3 Pt      2.02016      23.22975      14.95089      Pt      0 0      0.00000
HETATM      4 Pt      2.02016      3.69128      14.95089      Pt      0 0      0.00000
HETATM      5 Pt      2.02016      6.48249      14.95089      Pt      0 0      0.00000
HETATM      6 Pt      2.02016      9.27370      14.95089      Pt      0 0      0.00000
HETATM      7 Pt      2.02016      12.06491      14.95089      Pt      0 0      0.00000
HETATM      8 Pt      2.02016      14.85612      14.95089      Pt      0 0      0.00000
HETATM      9 Pt      6.85468      20.43854      14.95089      Pt      0 0      0.00000
HETATM     10 Pt      6.85468      23.22975      14.95089      Pt      0 0      0.00000
HETATM     11 Pt      6.85468      26.02096      14.95089      Pt      0 0      0.00000
HETATM     12 Pt      6.85468      6.48249      14.95089      Pt      0 0      0.00000
HETATM     13 Pt      6.85468      9.27370      14.95089      Pt      0 0      0.00000
HETATM     14 Pt      6.85468      12.06491      14.95089      Pt      0 0      0.00000
HETATM     15 Pt      6.85468      14.85612      14.95089      Pt      0 0      0.00000
HETATM     16 Pt      6.85468      17.64733      14.95089      Pt      0 0      0.00000
HETATM     17 Pt     11.68920      23.22975      14.95089      Pt      0 0      0.00000
HETATM     18 Pt     11.68920      26.02096      14.95089      Pt      0 0      0.00000
HETATM     19 Pt     11.68920      28.81217      14.95089      Pt      0 0      0.00000
HETATM     20 Pt     11.68920      9.27370      14.95089      Pt      0 0      0.00000
HETATM     21 Pt     11.68920      12.06491      14.95089      Pt      0 0      0.00000
HETATM     22 Pt     11.68920      14.85612      14.95089      Pt      0 0      0.00000
HETATM     23 Pt     11.68920      17.64733      14.95089      Pt      0 0      0.00000
HETATM     24 Pt     11.68920      20.43854      14.95089      Pt      0 0      0.00000
HETATM     25 Pt     16.52371      26.02096      14.95089      Pt      0 0      0.00000
HETATM     26 Pt     16.52371      28.81217      14.95089      Pt      0 0      0.00000
HETATM     27 Pt     16.52371      31.60338      14.95089      Pt      0 0      0.00000
HETATM     28 Pt     16.52371      12.06491      14.95089      Pt      0 0      0.00000
HETATM     29 Pt     16.52371      14.85612      14.95089      Pt      0 0      0.00000
HETATM     30 Pt     16.52371      17.64733      14.95089      Pt      0 0      0.00000
HETATM     31 Pt     16.52371      20.43854      14.95089      Pt      0 0      0.00000
HETATM     32 Pt     16.52371      23.22975      14.95089      Pt      0 0      0.00000
HETATM     33 Pt      4.43742      19.04294      14.95089      Pt      0 0      0.00000
HETATM     34 Pt      4.43742      21.83415      14.95089      Pt      0 0      0.00000
HETATM     35 Pt      4.43742      24.62536      14.95089      Pt      0 0      0.00000
HETATM     36 Pt      4.43742      5.08689      14.95089      Pt      0 0      0.00000
HETATM     37 Pt      4.43742      7.87810      14.95089      Pt      0 0      0.00000
HETATM     38 Pt      4.43742      10.66931      14.95089      Pt      0 0      0.00000
HETATM     39 Pt      4.43742      13.46052      14.95089      Pt      0 0      0.00000
HETATM     40 Pt      4.43742      16.25173      14.95089      Pt      0 0      0.00000
HETATM     41 Pt      9.27194      21.83415      14.95089      Pt      0 0      0.00000
HETATM     42 Pt      9.27194      24.62536      14.95089      Pt      0 0      0.00000
HETATM     43 Pt      9.27194      27.41657      14.95089      Pt      0 0      0.00000
HETATM     44 Pt      9.27194      7.87810      14.95089      Pt      0 0      0.00000
HETATM     45 Pt      9.27194      10.66931      14.95089      Pt      0 0      0.00000
HETATM     46 Pt      9.27194      13.46052      14.95089      Pt      0 0      0.00000
HETATM     47 Pt      9.27194      16.25173      14.95089      Pt      0 0      0.00000
HETATM     48 Pt      9.27194      19.04294      14.95089      Pt      0 0      0.00000
HETATM     49 Pt     14.10646      24.62536      14.95089      Pt      0 0      0.00000
HETATM     50 Pt     14.10646      27.41657      14.95089      Pt      0 0      0.00000
HETATM     51 Pt     14.10646      30.20778      14.95089      Pt      0 0      0.00000
HETATM     52 Pt     14.10646      10.66931      14.95089      Pt      0 0      0.00000
HETATM     53 Pt     14.10646      13.46052      14.95089      Pt      0 0      0.00000
HETATM     54 Pt     14.10646      16.25173      14.95089      Pt      0 0      0.00000
HETATM     55 Pt     14.10646      19.04294      14.95089      Pt      0 0      0.00000
HETATM     56 Pt     14.10646      21.83415      14.95089      Pt      0 0      0.00000
HETATM     57 Pt     18.94097      27.41657      14.95089      Pt      0 0      0.00000

```

|        |     |    |          |          |          |    |   |   |         |
|--------|-----|----|----------|----------|----------|----|---|---|---------|
| HETATM | 58  | Pt | 18.94097 | 30.20778 | 14.95089 | Pt | 0 | 0 | 0.00000 |
| HETATM | 59  | Pt | 18.94097 | 32.99899 | 14.95089 | Pt | 0 | 0 | 0.00000 |
| HETATM | 60  | Pt | 18.94097 | 13.46052 | 14.95089 | Pt | 0 | 0 | 0.00000 |
| HETATM | 61  | Pt | 18.94097 | 16.25173 | 14.95089 | Pt | 0 | 0 | 0.00000 |
| HETATM | 62  | Pt | 18.94097 | 19.04294 | 14.95089 | Pt | 0 | 0 | 0.00000 |
| HETATM | 63  | Pt | 18.94097 | 21.83415 | 14.95089 | Pt | 0 | 0 | 0.00000 |
| HETATM | 64  | Pt | 18.94097 | 24.62536 | 14.95089 | Pt | 0 | 0 | 0.00000 |
| HETATM | 65  | Pt | 2.82591  | 19.04294 | 17.22991 | Pt | 0 | 0 | 0.00000 |
| HETATM | 66  | Pt | 2.82591  | 21.83415 | 17.22991 | Pt | 0 | 0 | 0.00000 |
| HETATM | 67  | Pt | 2.82591  | 2.29568  | 17.22991 | Pt | 0 | 0 | 0.00000 |
| HETATM | 68  | Pt | 2.82591  | 5.08689  | 17.22991 | Pt | 0 | 0 | 0.00000 |
| HETATM | 69  | Pt | 2.82591  | 7.87810  | 17.22991 | Pt | 0 | 0 | 0.00000 |
| HETATM | 70  | Pt | 2.82591  | 10.66931 | 17.22991 | Pt | 0 | 0 | 0.00000 |
| HETATM | 71  | Pt | 2.82591  | 13.46052 | 17.22991 | Pt | 0 | 0 | 0.00000 |
| HETATM | 72  | Pt | 2.82591  | 16.25173 | 17.22991 | Pt | 0 | 0 | 0.00000 |
| HETATM | 73  | Pt | 7.66043  | 21.83415 | 17.22991 | Pt | 0 | 0 | 0.00000 |
| HETATM | 74  | Pt | 7.66043  | 24.62536 | 17.22991 | Pt | 0 | 0 | 0.00000 |
| HETATM | 75  | Pt | 7.66043  | 5.08689  | 17.22991 | Pt | 0 | 0 | 0.00000 |
| HETATM | 76  | Pt | 7.66043  | 7.87810  | 17.22991 | Pt | 0 | 0 | 0.00000 |
| HETATM | 77  | Pt | 7.66043  | 10.66931 | 17.22991 | Pt | 0 | 0 | 0.00000 |
| HETATM | 78  | Pt | 7.66043  | 13.46052 | 17.22991 | Pt | 0 | 0 | 0.00000 |
| HETATM | 79  | Pt | 7.66043  | 16.25173 | 17.22991 | Pt | 0 | 0 | 0.00000 |
| HETATM | 80  | Pt | 7.66043  | 19.04294 | 17.22991 | Pt | 0 | 0 | 0.00000 |
| HETATM | 81  | Pt | 12.49495 | 24.62536 | 17.22991 | Pt | 0 | 0 | 0.00000 |
| HETATM | 82  | Pt | 12.49495 | 27.41657 | 17.22991 | Pt | 0 | 0 | 0.00000 |
| HETATM | 83  | Pt | 12.49495 | 7.87810  | 17.22991 | Pt | 0 | 0 | 0.00000 |
| HETATM | 84  | Pt | 12.49495 | 10.66931 | 17.22991 | Pt | 0 | 0 | 0.00000 |
| HETATM | 85  | Pt | 12.49495 | 13.46052 | 17.22991 | Pt | 0 | 0 | 0.00000 |
| HETATM | 86  | Pt | 12.49495 | 16.25173 | 17.22991 | Pt | 0 | 0 | 0.00000 |
| HETATM | 87  | Pt | 12.49495 | 19.04294 | 17.22991 | Pt | 0 | 0 | 0.00000 |
| HETATM | 88  | Pt | 12.49495 | 21.83415 | 17.22991 | Pt | 0 | 0 | 0.00000 |
| HETATM | 89  | Pt | 17.32946 | 27.41657 | 17.22991 | Pt | 0 | 0 | 0.00000 |
| HETATM | 90  | Pt | 17.32946 | 30.20778 | 17.22991 | Pt | 0 | 0 | 0.00000 |
| HETATM | 91  | Pt | 17.32946 | 10.66931 | 17.22991 | Pt | 0 | 0 | 0.00000 |
| HETATM | 92  | Pt | 17.32946 | 13.46052 | 17.22991 | Pt | 0 | 0 | 0.00000 |
| HETATM | 93  | Pt | 17.32946 | 16.25173 | 17.22991 | Pt | 0 | 0 | 0.00000 |
| HETATM | 94  | Pt | 17.32946 | 19.04294 | 17.22991 | Pt | 0 | 0 | 0.00000 |
| HETATM | 95  | Pt | 17.32946 | 21.83415 | 17.22991 | Pt | 0 | 0 | 0.00000 |
| HETATM | 96  | Pt | 17.32946 | 24.62536 | 17.22991 | Pt | 0 | 0 | 0.00000 |
| HETATM | 97  | Pt | 5.24317  | 20.43854 | 17.22991 | Pt | 0 | 0 | 0.00000 |
| HETATM | 98  | Pt | 5.24317  | 23.22975 | 17.22991 | Pt | 0 | 0 | 0.00000 |
| HETATM | 99  | Pt | 5.24317  | 3.69128  | 17.22991 | Pt | 0 | 0 | 0.00000 |
| HETATM | 100 | Pt | 5.24317  | 6.48249  | 17.22991 | Pt | 0 | 0 | 0.00000 |
| HETATM | 101 | Pt | 5.24317  | 9.27370  | 17.22991 | Pt | 0 | 0 | 0.00000 |
| HETATM | 102 | Pt | 5.24317  | 12.06491 | 17.22991 | Pt | 0 | 0 | 0.00000 |
| HETATM | 103 | Pt | 5.24317  | 14.85612 | 17.22991 | Pt | 0 | 0 | 0.00000 |
| HETATM | 104 | Pt | 5.24317  | 17.64733 | 17.22991 | Pt | 0 | 0 | 0.00000 |
| HETATM | 105 | Pt | 10.07769 | 23.22975 | 17.22991 | Pt | 0 | 0 | 0.00000 |
| HETATM | 106 | Pt | 10.07769 | 26.02096 | 17.22991 | Pt | 0 | 0 | 0.00000 |
| HETATM | 107 | Pt | 10.07769 | 6.48249  | 17.22991 | Pt | 0 | 0 | 0.00000 |
| HETATM | 108 | Pt | 10.07769 | 9.27370  | 17.22991 | Pt | 0 | 0 | 0.00000 |
| HETATM | 109 | Pt | 10.07769 | 12.06491 | 17.22991 | Pt | 0 | 0 | 0.00000 |
| HETATM | 110 | Pt | 10.07769 | 14.85612 | 17.22991 | Pt | 0 | 0 | 0.00000 |
| HETATM | 111 | Pt | 10.07769 | 17.64733 | 17.22991 | Pt | 0 | 0 | 0.00000 |
| HETATM | 112 | Pt | 10.07769 | 20.43854 | 17.22991 | Pt | 0 | 0 | 0.00000 |
| HETATM | 113 | Pt | 14.91221 | 26.02096 | 17.22991 | Pt | 0 | 0 | 0.00000 |
| HETATM | 114 | Pt | 14.91221 | 28.81217 | 17.22991 | Pt | 0 | 0 | 0.00000 |
| HETATM | 115 | Pt | 14.91221 | 9.27370  | 17.22991 | Pt | 0 | 0 | 0.00000 |
| HETATM | 116 | Pt | 14.91221 | 12.06491 | 17.22991 | Pt | 0 | 0 | 0.00000 |
| HETATM | 117 | Pt | 14.91221 | 14.85612 | 17.22991 | Pt | 0 | 0 | 0.00000 |
| HETATM | 118 | Pt | 14.91221 | 17.64733 | 17.22991 | Pt | 0 | 0 | 0.00000 |
| HETATM | 119 | Pt | 14.91221 | 20.43854 | 17.22991 | Pt | 0 | 0 | 0.00000 |
| HETATM | 120 | Pt | 14.91221 | 23.22975 | 17.22991 | Pt | 0 | 0 | 0.00000 |

|        |     |    |          |          |          |    |   |   |         |
|--------|-----|----|----------|----------|----------|----|---|---|---------|
| HETATM | 121 | Pt | 0.40865  | 17.64733 | 17.22991 | Pt | 0 | 0 | 0.00000 |
| HETATM | 122 | Pt | 0.40865  | 20.43854 | 17.22991 | Pt | 0 | 0 | 0.00000 |
| HETATM | 123 | Pt | 0.40865  | 0.90007  | 17.22991 | Pt | 0 | 0 | 0.00000 |
| HETATM | 124 | Pt | 0.40865  | 3.69128  | 17.22991 | Pt | 0 | 0 | 0.00000 |
| HETATM | 125 | Pt | 0.40865  | 6.48249  | 17.22991 | Pt | 0 | 0 | 0.00000 |
| HETATM | 126 | Pt | 0.40865  | 9.27370  | 17.22991 | Pt | 0 | 0 | 0.00000 |
| HETATM | 127 | Pt | 0.40865  | 12.06491 | 17.22991 | Pt | 0 | 0 | 0.00000 |
| HETATM | 128 | Pt | 0.40865  | 14.85612 | 17.22991 | Pt | 0 | 0 | 0.00000 |
| HETATM | 129 | Pt | 3.63066  | 20.43854 | 19.50840 | Pt | 0 | 0 | 0.00000 |
| HETATM | 130 | Pt | 3.63066  | 23.22975 | 19.50840 | Pt | 0 | 0 | 0.00000 |
| HETATM | 131 | Pt | 3.63066  | 3.69127  | 19.50839 | Pt | 0 | 0 | 0.00000 |
| HETATM | 132 | Pt | 3.63067  | 6.48249  | 19.50839 | Pt | 0 | 0 | 0.00000 |
| HETATM | 133 | Pt | 3.63067  | 9.27371  | 19.50838 | Pt | 0 | 0 | 0.00000 |
| HETATM | 134 | Pt | 3.63067  | 12.06492 | 19.50838 | Pt | 0 | 0 | 0.00000 |
| HETATM | 135 | Pt | 3.63067  | 14.85613 | 19.50839 | Pt | 0 | 0 | 0.00000 |
| HETATM | 136 | Pt | 3.63066  | 17.64734 | 19.50840 | Pt | 0 | 0 | 0.00000 |
| HETATM | 137 | Pt | 8.46518  | 23.22972 | 19.50844 | Pt | 0 | 0 | 0.00000 |
| HETATM | 138 | Pt | 8.46519  | 26.02093 | 19.50844 | Pt | 0 | 0 | 0.00000 |
| HETATM | 139 | Pt | 8.46520  | 6.48248  | 19.50844 | Pt | 0 | 0 | 0.00000 |
| HETATM | 140 | Pt | 8.46521  | 9.27371  | 19.50844 | Pt | 0 | 0 | 0.00000 |
| HETATM | 141 | Pt | 8.46520  | 12.06494 | 19.50845 | Pt | 0 | 0 | 0.00000 |
| HETATM | 142 | Pt | 8.46518  | 14.85616 | 19.50845 | Pt | 0 | 0 | 0.00000 |
| HETATM | 143 | Pt | 8.46517  | 17.64735 | 19.50844 | Pt | 0 | 0 | 0.00000 |
| HETATM | 144 | Pt | 8.46517  | 20.43853 | 19.50844 | Pt | 0 | 0 | 0.00000 |
| HETATM | 145 | Pt | 13.29969 | 26.02093 | 19.50842 | Pt | 0 | 0 | 0.00000 |
| HETATM | 146 | Pt | 13.29971 | 28.81216 | 19.50842 | Pt | 0 | 0 | 0.00000 |
| HETATM | 147 | Pt | 13.29971 | 9.27372  | 19.50842 | Pt | 0 | 0 | 0.00000 |
| HETATM | 148 | Pt | 13.29969 | 12.06495 | 19.50842 | Pt | 0 | 0 | 0.00000 |
| HETATM | 149 | Pt | 13.29967 | 14.85616 | 19.50841 | Pt | 0 | 0 | 0.00000 |
| HETATM | 150 | Pt | 13.29966 | 17.64735 | 19.50840 | Pt | 0 | 0 | 0.00000 |
| HETATM | 151 | Pt | 13.29966 | 20.43853 | 19.50841 | Pt | 0 | 0 | 0.00000 |
| HETATM | 152 | Pt | 13.29967 | 23.22972 | 19.50841 | Pt | 0 | 0 | 0.00000 |
| HETATM | 153 | Pt | 18.13421 | 28.81216 | 19.50839 | Pt | 0 | 0 | 0.00000 |
| HETATM | 154 | Pt | 18.13421 | 31.60339 | 19.50840 | Pt | 0 | 0 | 0.00000 |
| HETATM | 155 | Pt | 18.13420 | 12.06493 | 19.50839 | Pt | 0 | 0 | 0.00000 |
| HETATM | 156 | Pt | 18.13419 | 14.85614 | 19.50838 | Pt | 0 | 0 | 0.00000 |
| HETATM | 157 | Pt | 18.13418 | 17.64734 | 19.50837 | Pt | 0 | 0 | 0.00000 |
| HETATM | 158 | Pt | 18.13418 | 20.43854 | 19.50837 | Pt | 0 | 0 | 0.00000 |
| HETATM | 159 | Pt | 18.13419 | 23.22974 | 19.50837 | Pt | 0 | 0 | 0.00000 |
| HETATM | 160 | Pt | 18.13420 | 26.02094 | 19.50838 | Pt | 0 | 0 | 0.00000 |
| HETATM | 161 | Pt | 6.04855  | 21.83413 | 19.50962 | Pt | 0 | 0 | 0.00000 |
| HETATM | 162 | Pt | 6.04855  | 24.62533 | 19.50962 | Pt | 0 | 0 | 0.00000 |
| HETATM | 163 | Pt | 6.04855  | 5.08687  | 19.50962 | Pt | 0 | 0 | 0.00000 |
| HETATM | 164 | Pt | 6.04855  | 7.87809  | 19.50961 | Pt | 0 | 0 | 0.00000 |
| HETATM | 165 | Pt | 6.04855  | 10.66932 | 19.50961 | Pt | 0 | 0 | 0.00000 |
| HETATM | 166 | Pt | 6.04855  | 13.46054 | 19.50961 | Pt | 0 | 0 | 0.00000 |
| HETATM | 167 | Pt | 6.04855  | 16.25175 | 19.50962 | Pt | 0 | 0 | 0.00000 |
| HETATM | 168 | Pt | 6.04855  | 19.04294 | 19.50962 | Pt | 0 | 0 | 0.00000 |
| HETATM | 169 | Pt | 10.88304 | 24.62535 | 19.50958 | Pt | 0 | 0 | 0.00000 |
| HETATM | 170 | Pt | 10.88305 | 27.41656 | 19.50959 | Pt | 0 | 0 | 0.00000 |
| HETATM | 171 | Pt | 10.88305 | 7.87810  | 19.50960 | Pt | 0 | 0 | 0.00000 |
| HETATM | 172 | Pt | 10.88305 | 10.66931 | 19.50960 | Pt | 0 | 0 | 0.00000 |
| HETATM | 173 | Pt | 10.88304 | 13.46052 | 19.50960 | Pt | 0 | 0 | 0.00000 |
| HETATM | 174 | Pt | 10.88304 | 16.25173 | 19.50959 | Pt | 0 | 0 | 0.00000 |
| HETATM | 175 | Pt | 10.88303 | 19.04294 | 19.50959 | Pt | 0 | 0 | 0.00000 |
| HETATM | 176 | Pt | 10.88303 | 21.83414 | 19.50958 | Pt | 0 | 0 | 0.00000 |
| HETATM | 177 | Pt | 15.71753 | 27.41659 | 19.50957 | Pt | 0 | 0 | 0.00000 |
| HETATM | 178 | Pt | 15.71754 | 30.20778 | 19.50958 | Pt | 0 | 0 | 0.00000 |
| HETATM | 179 | Pt | 15.71753 | 10.66930 | 19.50958 | Pt | 0 | 0 | 0.00000 |
| HETATM | 180 | Pt | 15.71753 | 13.46050 | 19.50957 | Pt | 0 | 0 | 0.00000 |
| HETATM | 181 | Pt | 15.71752 | 16.25171 | 19.50956 | Pt | 0 | 0 | 0.00000 |
| HETATM | 182 | Pt | 15.71751 | 19.04293 | 19.50955 | Pt | 0 | 0 | 0.00000 |
| HETATM | 183 | Pt | 15.71751 | 21.83416 | 19.50954 | Pt | 0 | 0 | 0.00000 |

|        |     |    |          |          |          |    |   |   |         |
|--------|-----|----|----------|----------|----------|----|---|---|---------|
| HETATM | 184 | Pt | 15.71752 | 24.62538 | 19.50955 | Pt | 0 | 0 | 0.00000 |
| HETATM | 185 | Pt | 1.21398  | 19.04294 | 19.50956 | Pt | 0 | 0 | 0.00000 |
| HETATM | 186 | Pt | 1.21398  | 21.83413 | 19.50956 | Pt | 0 | 0 | 0.00000 |
| HETATM | 187 | Pt | 1.21397  | 2.29565  | 19.50956 | Pt | 0 | 0 | 0.00000 |
| HETATM | 188 | Pt | 1.21396  | 5.08686  | 19.50955 | Pt | 0 | 0 | 0.00000 |
| HETATM | 189 | Pt | 1.21396  | 7.87809  | 19.50954 | Pt | 0 | 0 | 0.00000 |
| HETATM | 190 | Pt | 1.21396  | 10.66933 | 19.50953 | Pt | 0 | 0 | 0.00000 |
| HETATM | 191 | Pt | 1.21397  | 13.46055 | 19.50955 | Pt | 0 | 0 | 0.00000 |
| HETATM | 192 | Pt | 1.21398  | 16.25175 | 19.50956 | Pt | 0 | 0 | 0.00000 |
| HETATM | 193 | Pt | 2.01924  | 17.64733 | 21.79036 | Pt | 0 | 0 | 0.00000 |
| HETATM | 194 | Pt | 2.01925  | 20.43854 | 21.79036 | Pt | 0 | 0 | 0.00000 |
| HETATM | 195 | Pt | 2.01923  | 23.22976 | 21.79035 | Pt | 0 | 0 | 0.00000 |
| HETATM | 196 | Pt | 2.01921  | 3.69130  | 21.79035 | Pt | 0 | 0 | 0.00000 |
| HETATM | 197 | Pt | 2.01919  | 6.48250  | 21.79035 | Pt | 0 | 0 | 0.00000 |
| HETATM | 198 | Pt | 2.01920  | 9.27370  | 21.79034 | Pt | 0 | 0 | 0.00000 |
| HETATM | 199 | Pt | 2.01921  | 12.06490 | 21.79034 | Pt | 0 | 0 | 0.00000 |
| HETATM | 200 | Pt | 2.01923  | 14.85611 | 21.79035 | Pt | 0 | 0 | 0.00000 |
| HETATM | 201 | Pt | 6.85371  | 20.43855 | 21.79037 | Pt | 0 | 0 | 0.00000 |
| HETATM | 202 | Pt | 6.85369  | 23.22977 | 21.79036 | Pt | 0 | 0 | 0.00000 |
| HETATM | 203 | Pt | 6.85367  | 26.02098 | 21.79035 | Pt | 0 | 0 | 0.00000 |
| HETATM | 204 | Pt | 6.85365  | 6.48250  | 21.79033 | Pt | 0 | 0 | 0.00000 |
| HETATM | 205 | Pt | 6.85364  | 9.27369  | 21.79032 | Pt | 0 | 0 | 0.00000 |
| HETATM | 206 | Pt | 6.85366  | 12.06490 | 21.79033 | Pt | 0 | 0 | 0.00000 |
| HETATM | 207 | Pt | 6.85369  | 14.85611 | 21.79035 | Pt | 0 | 0 | 0.00000 |
| HETATM | 208 | Pt | 6.85370  | 17.64733 | 21.79036 | Pt | 0 | 0 | 0.00000 |
| HETATM | 209 | Pt | 11.68823 | 23.22976 | 21.79041 | Pt | 0 | 0 | 0.00000 |
| HETATM | 210 | Pt | 11.68822 | 26.02097 | 21.79039 | Pt | 0 | 0 | 0.00000 |
| HETATM | 211 | Pt | 11.68820 | 28.81217 | 21.79038 | Pt | 0 | 0 | 0.00000 |
| HETATM | 212 | Pt | 11.68820 | 9.27369  | 21.79038 | Pt | 0 | 0 | 0.00000 |
| HETATM | 213 | Pt | 11.68822 | 12.06490 | 21.79040 | Pt | 0 | 0 | 0.00000 |
| HETATM | 214 | Pt | 11.68823 | 14.85611 | 21.79042 | Pt | 0 | 0 | 0.00000 |
| HETATM | 215 | Pt | 11.68824 | 17.64733 | 21.79043 | Pt | 0 | 0 | 0.00000 |
| HETATM | 216 | Pt | 11.68824 | 20.43855 | 21.79042 | Pt | 0 | 0 | 0.00000 |
| HETATM | 217 | Pt | 16.52277 | 26.02096 | 21.79036 | Pt | 0 | 0 | 0.00000 |
| HETATM | 218 | Pt | 16.52277 | 28.81217 | 21.79035 | Pt | 0 | 0 | 0.00000 |
| HETATM | 219 | Pt | 16.52278 | 31.60338 | 21.79035 | Pt | 0 | 0 | 0.00000 |
| HETATM | 220 | Pt | 16.52277 | 12.06492 | 21.79035 | Pt | 0 | 0 | 0.00000 |
| HETATM | 221 | Pt | 16.52276 | 14.85612 | 21.79036 | Pt | 0 | 0 | 0.00000 |
| HETATM | 222 | Pt | 16.52276 | 17.64733 | 21.79037 | Pt | 0 | 0 | 0.00000 |
| HETATM | 223 | Pt | 16.52276 | 20.43854 | 21.79038 | Pt | 0 | 0 | 0.00000 |
| HETATM | 224 | Pt | 16.52276 | 23.22975 | 21.79037 | Pt | 0 | 0 | 0.00000 |
| HETATM | 225 | Pt | 4.43534  | 19.04294 | 21.78567 | Pt | 0 | 0 | 0.00000 |
| HETATM | 226 | Pt | 4.43534  | 21.83415 | 21.78568 | Pt | 0 | 0 | 0.00000 |
| HETATM | 227 | Pt | 4.43532  | 24.62536 | 21.78571 | Pt | 0 | 0 | 0.00000 |
| HETATM | 228 | Pt | 4.43529  | 5.08689  | 21.78573 | Pt | 0 | 0 | 0.00000 |
| HETATM | 229 | Pt | 4.43528  | 7.87810  | 21.78574 | Pt | 0 | 0 | 0.00000 |
| HETATM | 230 | Pt | 4.43529  | 10.66931 | 21.78573 | Pt | 0 | 0 | 0.00000 |
| HETATM | 231 | Pt | 4.43530  | 13.46052 | 21.78571 | Pt | 0 | 0 | 0.00000 |
| HETATM | 232 | Pt | 4.43532  | 16.25173 | 21.78568 | Pt | 0 | 0 | 0.00000 |
| HETATM | 233 | Pt | 9.26988  | 21.83414 | 21.78573 | Pt | 0 | 0 | 0.00000 |
| HETATM | 234 | Pt | 9.26986  | 24.62534 | 21.78574 | Pt | 0 | 0 | 0.00000 |
| HETATM | 235 | Pt | 9.26983  | 27.41655 | 21.78575 | Pt | 0 | 0 | 0.00000 |
| HETATM | 236 | Pt | 9.26982  | 7.87809  | 21.78575 | Pt | 0 | 0 | 0.00000 |
| HETATM | 237 | Pt | 9.26983  | 10.66931 | 21.78575 | Pt | 0 | 0 | 0.00000 |
| HETATM | 238 | Pt | 9.26985  | 13.46053 | 21.78575 | Pt | 0 | 0 | 0.00000 |
| HETATM | 239 | Pt | 9.26988  | 16.25174 | 21.78574 | Pt | 0 | 0 | 0.00000 |
| HETATM | 240 | Pt | 9.26989  | 19.04294 | 21.78573 | Pt | 0 | 0 | 0.00000 |
| HETATM | 241 | Pt | 14.10437 | 24.62534 | 21.78573 | Pt | 0 | 0 | 0.00000 |
| HETATM | 242 | Pt | 14.10435 | 27.41655 | 21.78572 | Pt | 0 | 0 | 0.00000 |
| HETATM | 243 | Pt | 14.10435 | 30.20778 | 21.78571 | Pt | 0 | 0 | 0.00000 |
| HETATM | 244 | Pt | 14.10436 | 10.66932 | 21.78572 | Pt | 0 | 0 | 0.00000 |
| HETATM | 245 | Pt | 14.10437 | 13.46054 | 21.78573 | Pt | 0 | 0 | 0.00000 |
| HETATM | 246 | Pt | 14.10438 | 16.25174 | 21.78574 | Pt | 0 | 0 | 0.00000 |

|        |     |    |          |          |          |    |   |   |         |
|--------|-----|----|----------|----------|----------|----|---|---|---------|
| HETATM | 247 | Pt | 14.10438 | 19.04294 | 21.78574 | Pt | 0 | 0 | 0.00000 |
| HETATM | 248 | Pt | 14.10438 | 21.83414 | 21.78574 | Pt | 0 | 0 | 0.00000 |
| HETATM | 249 | Pt | 18.93889 | 27.41656 | 21.78565 | Pt | 0 | 0 | 0.00000 |
| HETATM | 250 | Pt | 18.93889 | 30.20778 | 21.78564 | Pt | 0 | 0 | 0.00000 |
| HETATM | 251 | Pt | 18.93889 | 32.99899 | 21.78565 | Pt | 0 | 0 | 0.00000 |
| HETATM | 252 | Pt | 18.93889 | 13.46053 | 21.78568 | Pt | 0 | 0 | 0.00000 |
| HETATM | 253 | Pt | 18.93888 | 16.25174 | 21.78570 | Pt | 0 | 0 | 0.00000 |
| HETATM | 254 | Pt | 18.93887 | 19.04294 | 21.78571 | Pt | 0 | 0 | 0.00000 |
| HETATM | 255 | Pt | 18.93887 | 21.83414 | 21.78570 | Pt | 0 | 0 | 0.00000 |
| HETATM | 256 | Pt | 18.93888 | 24.62534 | 21.78567 | Pt | 0 | 0 | 0.00000 |
| HETATM | 257 | Pt | 2.82902  | 19.04293 | 24.07127 | Pt | 0 | 0 | 0.00000 |
| HETATM | 258 | Pt | 2.82901  | 21.83413 | 24.07127 | Pt | 0 | 0 | 0.00000 |
| HETATM | 259 | Pt | 2.82900  | 2.29566  | 24.07127 | Pt | 0 | 0 | 0.00000 |
| HETATM | 260 | Pt | 2.82897  | 5.08688  | 24.07127 | Pt | 0 | 0 | 0.00000 |
| HETATM | 261 | Pt | 2.82896  | 7.87810  | 24.07126 | Pt | 0 | 0 | 0.00000 |
| HETATM | 262 | Pt | 2.82897  | 10.66932 | 24.07125 | Pt | 0 | 0 | 0.00000 |
| HETATM | 263 | Pt | 2.82899  | 13.46054 | 24.07126 | Pt | 0 | 0 | 0.00000 |
| HETATM | 264 | Pt | 2.82901  | 16.25174 | 24.07128 | Pt | 0 | 0 | 0.00000 |
| HETATM | 265 | Pt | 7.66352  | 21.83416 | 24.07136 | Pt | 0 | 0 | 0.00000 |
| HETATM | 266 | Pt | 7.66351  | 24.62537 | 24.07134 | Pt | 0 | 0 | 0.00000 |
| HETATM | 267 | Pt | 7.66349  | 5.08689  | 24.07132 | Pt | 0 | 0 | 0.00000 |
| HETATM | 268 | Pt | 7.66348  | 7.87810  | 24.07131 | Pt | 0 | 0 | 0.00000 |
| HETATM | 269 | Pt | 7.66350  | 10.66930 | 24.07131 | Pt | 0 | 0 | 0.00000 |
| HETATM | 270 | Pt | 7.66351  | 13.46051 | 24.07133 | Pt | 0 | 0 | 0.00000 |
| HETATM | 271 | Pt | 7.66352  | 16.25172 | 24.07136 | Pt | 0 | 0 | 0.00000 |
| HETATM | 272 | Pt | 7.66352  | 19.04294 | 24.07137 | Pt | 0 | 0 | 0.00000 |
| HETATM | 273 | Pt | 12.49807 | 24.62539 | 24.07132 | Pt | 0 | 0 | 0.00000 |
| HETATM | 274 | Pt | 12.49807 | 27.41660 | 24.07130 | Pt | 0 | 0 | 0.00000 |
| HETATM | 275 | Pt | 12.49808 | 7.87810  | 24.07130 | Pt | 0 | 0 | 0.00000 |
| HETATM | 276 | Pt | 12.49808 | 10.66928 | 24.07130 | Pt | 0 | 0 | 0.00000 |
| HETATM | 277 | Pt | 12.49808 | 13.46048 | 24.07132 | Pt | 0 | 0 | 0.00000 |
| HETATM | 278 | Pt | 12.49807 | 16.25170 | 24.07136 | Pt | 0 | 0 | 0.00000 |
| HETATM | 279 | Pt | 12.49807 | 19.04293 | 24.07137 | Pt | 0 | 0 | 0.00000 |
| HETATM | 280 | Pt | 12.49807 | 21.83417 | 24.07135 | Pt | 0 | 0 | 0.00000 |
| HETATM | 281 | Pt | 17.33257 | 27.41660 | 24.07128 | Pt | 0 | 0 | 0.00000 |
| HETATM | 282 | Pt | 17.33258 | 30.20778 | 24.07127 | Pt | 0 | 0 | 0.00000 |
| HETATM | 283 | Pt | 17.33257 | 10.66928 | 24.07126 | Pt | 0 | 0 | 0.00000 |
| HETATM | 284 | Pt | 17.33255 | 13.46048 | 24.07128 | Pt | 0 | 0 | 0.00000 |
| HETATM | 285 | Pt | 17.33254 | 16.25170 | 24.07131 | Pt | 0 | 0 | 0.00000 |
| HETATM | 286 | Pt | 17.33254 | 19.04293 | 24.07131 | Pt | 0 | 0 | 0.00000 |
| HETATM | 287 | Pt | 17.33254 | 21.83417 | 24.07129 | Pt | 0 | 0 | 0.00000 |
| HETATM | 288 | Pt | 17.33255 | 24.62540 | 24.07128 | Pt | 0 | 0 | 0.00000 |
| HETATM | 289 | Pt | 5.23547  | 20.43853 | 24.06278 | Pt | 0 | 0 | 0.00000 |
| HETATM | 290 | Pt | 5.23547  | 23.22971 | 24.06280 | Pt | 0 | 0 | 0.00000 |
| HETATM | 291 | Pt | 5.23546  | 3.69124  | 24.06282 | Pt | 0 | 0 | 0.00000 |
| HETATM | 292 | Pt | 5.23545  | 6.48248  | 24.06285 | Pt | 0 | 0 | 0.00000 |
| HETATM | 293 | Pt | 5.23545  | 9.27372  | 24.06284 | Pt | 0 | 0 | 0.00000 |
| HETATM | 294 | Pt | 5.23546  | 12.06495 | 24.06282 | Pt | 0 | 0 | 0.00000 |
| HETATM | 295 | Pt | 5.23547  | 14.85616 | 24.06280 | Pt | 0 | 0 | 0.00000 |
| HETATM | 296 | Pt | 5.23547  | 17.64735 | 24.06278 | Pt | 0 | 0 | 0.00000 |
| HETATM | 297 | Pt | 10.07004 | 23.22972 | 24.06287 | Pt | 0 | 0 | 0.00000 |
| HETATM | 298 | Pt | 10.07004 | 26.02093 | 24.06286 | Pt | 0 | 0 | 0.00000 |
| HETATM | 299 | Pt | 10.07003 | 6.48247  | 24.06286 | Pt | 0 | 0 | 0.00000 |
| HETATM | 300 | Pt | 10.07004 | 9.27371  | 24.06286 | Pt | 0 | 0 | 0.00000 |
| HETATM | 301 | Pt | 10.07004 | 12.06494 | 24.06287 | Pt | 0 | 0 | 0.00000 |
| HETATM | 302 | Pt | 10.07005 | 14.85616 | 24.06287 | Pt | 0 | 0 | 0.00000 |
| HETATM | 303 | Pt | 10.07004 | 17.64735 | 24.06288 | Pt | 0 | 0 | 0.00000 |
| HETATM | 304 | Pt | 10.07004 | 20.43854 | 24.06287 | Pt | 0 | 0 | 0.00000 |
| HETATM | 305 | Pt | 14.90456 | 26.02096 | 24.06285 | Pt | 0 | 0 | 0.00000 |
| HETATM | 306 | Pt | 14.90456 | 28.81217 | 24.06282 | Pt | 0 | 0 | 0.00000 |
| HETATM | 307 | Pt | 14.90456 | 9.27371  | 24.06282 | Pt | 0 | 0 | 0.00000 |
| HETATM | 308 | Pt | 14.90456 | 12.06492 | 24.06284 | Pt | 0 | 0 | 0.00000 |
| HETATM | 309 | Pt | 14.90455 | 14.85613 | 24.06287 | Pt | 0 | 0 | 0.00000 |

|        |     |    |          |          |          |    |   |   |         |
|--------|-----|----|----------|----------|----------|----|---|---|---------|
| HETATM | 310 | Pt | 14.90455 | 17.64733 | 24.06290 | Pt | 0 | 0 | 0.00000 |
| HETATM | 311 | Pt | 14.90455 | 20.43853 | 24.06290 | Pt | 0 | 0 | 0.00000 |
| HETATM | 312 | Pt | 14.90455 | 23.22974 | 24.06288 | Pt | 0 | 0 | 0.00000 |
| HETATM | 313 | Pt | 0.40097  | 17.64735 | 24.06275 | Pt | 0 | 0 | 0.00000 |
| HETATM | 314 | Pt | 0.40098  | 20.43854 | 24.06274 | Pt | 0 | 0 | 0.00000 |
| HETATM | 315 | Pt | 0.40097  | 0.90005  | 24.06277 | Pt | 0 | 0 | 0.00000 |
| HETATM | 316 | Pt | 0.40096  | 3.69126  | 24.06281 | Pt | 0 | 0 | 0.00000 |
| HETATM | 317 | Pt | 0.40095  | 6.48248  | 24.06285 | Pt | 0 | 0 | 0.00000 |
| HETATM | 318 | Pt | 0.40096  | 9.27371  | 24.06285 | Pt | 0 | 0 | 0.00000 |
| HETATM | 319 | Pt | 0.40096  | 12.06493 | 24.06282 | Pt | 0 | 0 | 0.00000 |
| HETATM | 320 | Pt | 0.40096  | 14.85614 | 24.06278 | Pt | 0 | 0 | 0.00000 |
| HETATM | 321 | Pt | 3.61399  | 20.43853 | 26.38350 | Pt | 0 | 0 | 0.00000 |
| HETATM | 322 | Pt | 3.61398  | 23.22973 | 26.38348 | Pt | 0 | 0 | 0.00000 |
| HETATM | 323 | Pt | 3.61397  | 3.69127  | 26.38346 | Pt | 0 | 0 | 0.00000 |
| HETATM | 324 | Pt | 3.61397  | 6.48249  | 26.38344 | Pt | 0 | 0 | 0.00000 |
| HETATM | 325 | Pt | 3.61397  | 9.27371  | 26.38343 | Pt | 0 | 0 | 0.00000 |
| HETATM | 326 | Pt | 3.61397  | 12.06493 | 26.38345 | Pt | 0 | 0 | 0.00000 |
| HETATM | 327 | Pt | 3.61398  | 14.85614 | 26.38348 | Pt | 0 | 0 | 0.00000 |
| HETATM | 328 | Pt | 3.61399  | 17.64734 | 26.38350 | Pt | 0 | 0 | 0.00000 |
| HETATM | 329 | Pt | 8.44859  | 23.22973 | 26.38351 | Pt | 0 | 0 | 0.00000 |
| HETATM | 330 | Pt | 8.44859  | 26.02094 | 26.38349 | Pt | 0 | 0 | 0.00000 |
| HETATM | 331 | Pt | 8.44859  | 6.48247  | 26.38346 | Pt | 0 | 0 | 0.00000 |
| HETATM | 332 | Pt | 8.44860  | 9.27370  | 26.38346 | Pt | 0 | 0 | 0.00000 |
| HETATM | 333 | Pt | 8.44860  | 12.06494 | 26.38347 | Pt | 0 | 0 | 0.00000 |
| HETATM | 334 | Pt | 8.44860  | 14.85615 | 26.38350 | Pt | 0 | 0 | 0.00000 |
| HETATM | 335 | Pt | 8.44860  | 17.64735 | 26.38353 | Pt | 0 | 0 | 0.00000 |
| HETATM | 336 | Pt | 8.44859  | 20.43853 | 26.38353 | Pt | 0 | 0 | 0.00000 |
| HETATM | 337 | Pt | 13.28311 | 26.02094 | 26.38347 | Pt | 0 | 0 | 0.00000 |
| HETATM | 338 | Pt | 13.28311 | 28.81216 | 26.38346 | Pt | 0 | 0 | 0.00000 |
| HETATM | 339 | Pt | 13.28310 | 9.27371  | 26.38346 | Pt | 0 | 0 | 0.00000 |
| HETATM | 340 | Pt | 13.28310 | 12.06494 | 26.38346 | Pt | 0 | 0 | 0.00000 |
| HETATM | 341 | Pt | 13.28310 | 14.85614 | 26.38348 | Pt | 0 | 0 | 0.00000 |
| HETATM | 342 | Pt | 13.28309 | 17.64734 | 26.38349 | Pt | 0 | 0 | 0.00000 |
| HETATM | 343 | Pt | 13.28309 | 20.43853 | 26.38349 | Pt | 0 | 0 | 0.00000 |
| HETATM | 344 | Pt | 13.28310 | 23.22973 | 26.38348 | Pt | 0 | 0 | 0.00000 |
| HETATM | 345 | Pt | 18.11757 | 28.81217 | 26.38347 | Pt | 0 | 0 | 0.00000 |
| HETATM | 346 | Pt | 18.11758 | 31.60338 | 26.38346 | Pt | 0 | 0 | 0.00000 |
| HETATM | 347 | Pt | 18.11758 | 12.06492 | 26.38346 | Pt | 0 | 0 | 0.00000 |
| HETATM | 348 | Pt | 18.11757 | 14.85613 | 26.38345 | Pt | 0 | 0 | 0.00000 |
| HETATM | 349 | Pt | 18.11756 | 17.64734 | 26.38344 | Pt | 0 | 0 | 0.00000 |
| HETATM | 350 | Pt | 18.11756 | 20.43854 | 26.38343 | Pt | 0 | 0 | 0.00000 |
| HETATM | 351 | Pt | 18.11756 | 23.22974 | 26.38344 | Pt | 0 | 0 | 0.00000 |
| HETATM | 352 | Pt | 18.11757 | 26.02096 | 26.38345 | Pt | 0 | 0 | 0.00000 |
| HETATM | 353 | Pt | 6.05579  | 21.83410 | 26.31314 | Pt | 0 | 0 | 0.00000 |
| HETATM | 354 | Pt | 6.05580  | 24.62528 | 26.31313 | Pt | 0 | 0 | 0.00000 |
| HETATM | 355 | Pt | 6.05582  | 5.08683  | 26.31313 | Pt | 0 | 0 | 0.00000 |
| HETATM | 356 | Pt | 6.05583  | 7.87810  | 26.31313 | Pt | 0 | 0 | 0.00000 |
| HETATM | 357 | Pt | 6.05582  | 10.66936 | 26.31312 | Pt | 0 | 0 | 0.00000 |
| HETATM | 358 | Pt | 6.05581  | 13.46058 | 26.31312 | Pt | 0 | 0 | 0.00000 |
| HETATM | 359 | Pt | 6.05579  | 16.25178 | 26.31313 | Pt | 0 | 0 | 0.00000 |
| HETATM | 360 | Pt | 6.05578  | 19.04294 | 26.31313 | Pt | 0 | 0 | 0.00000 |
| HETATM | 361 | Pt | 10.89034 | 24.62529 | 26.31316 | Pt | 0 | 0 | 0.00000 |
| HETATM | 362 | Pt | 10.89037 | 27.41652 | 26.31315 | Pt | 0 | 0 | 0.00000 |
| HETATM | 363 | Pt | 10.89038 | 7.87809  | 26.31314 | Pt | 0 | 0 | 0.00000 |
| HETATM | 364 | Pt | 10.89037 | 10.66934 | 26.31314 | Pt | 0 | 0 | 0.00000 |
| HETATM | 365 | Pt | 10.89035 | 13.46057 | 26.31315 | Pt | 0 | 0 | 0.00000 |
| HETATM | 366 | Pt | 10.89032 | 16.25178 | 26.31318 | Pt | 0 | 0 | 0.00000 |
| HETATM | 367 | Pt | 10.89031 | 19.04295 | 26.31319 | Pt | 0 | 0 | 0.00000 |
| HETATM | 368 | Pt | 10.89032 | 21.83411 | 26.31318 | Pt | 0 | 0 | 0.00000 |
| HETATM | 369 | Pt | 15.72488 | 27.41656 | 26.31310 | Pt | 0 | 0 | 0.00000 |
| HETATM | 370 | Pt | 15.72489 | 30.20778 | 26.31309 | Pt | 0 | 0 | 0.00000 |
| HETATM | 371 | Pt | 15.72487 | 10.66932 | 26.31309 | Pt | 0 | 0 | 0.00000 |
| HETATM | 372 | Pt | 15.72485 | 13.46053 | 26.31311 | Pt | 0 | 0 | 0.00000 |

|        |     |    |          |          |          |    |   |   |         |
|--------|-----|----|----------|----------|----------|----|---|---|---------|
| HETATM | 373 | Pt | 15.72483 | 16.25173 | 26.31314 | Pt | 0 | 0 | 0.00000 |
| HETATM | 374 | Pt | 15.72482 | 19.04293 | 26.31314 | Pt | 0 | 0 | 0.00000 |
| HETATM | 375 | Pt | 15.72483 | 21.83414 | 26.31313 | Pt | 0 | 0 | 0.00000 |
| HETATM | 376 | Pt | 15.72486 | 24.62534 | 26.31312 | Pt | 0 | 0 | 0.00000 |
| HETATM | 377 | Pt | 1.22126  | 19.04295 | 26.31308 | Pt | 0 | 0 | 0.00000 |
| HETATM | 378 | Pt | 1.22126  | 21.83413 | 26.31309 | Pt | 0 | 0 | 0.00000 |
| HETATM | 379 | Pt | 1.22126  | 2.29564  | 26.31311 | Pt | 0 | 0 | 0.00000 |
| HETATM | 380 | Pt | 1.22126  | 5.08685  | 26.31312 | Pt | 0 | 0 | 0.00000 |
| HETATM | 381 | Pt | 1.22125  | 7.87809  | 26.31312 | Pt | 0 | 0 | 0.00000 |
| HETATM | 382 | Pt | 1.22125  | 10.66933 | 26.31311 | Pt | 0 | 0 | 0.00000 |
| HETATM | 383 | Pt | 1.22126  | 13.46056 | 26.31310 | Pt | 0 | 0 | 0.00000 |
| HETATM | 384 | Pt | 1.22126  | 16.25176 | 26.31309 | Pt | 0 | 0 | 0.00000 |
| HETATM | 385 | Pt | 2.06158  | 17.64734 | 28.94884 | Pt | 0 | 0 | 0.00000 |
| HETATM | 386 | Pt | 2.06157  | 20.43855 | 28.94883 | Pt | 0 | 0 | 0.00000 |
| HETATM | 387 | Pt | 2.06156  | 23.22975 | 28.94883 | Pt | 0 | 0 | 0.00000 |
| HETATM | 388 | Pt | 2.06156  | 3.69129  | 28.94884 | Pt | 0 | 0 | 0.00000 |
| HETATM | 389 | Pt | 2.06156  | 6.48250  | 28.94884 | Pt | 0 | 0 | 0.00000 |
| HETATM | 390 | Pt | 2.06156  | 9.27370  | 28.94883 | Pt | 0 | 0 | 0.00000 |
| HETATM | 391 | Pt | 2.06156  | 12.06490 | 28.94882 | Pt | 0 | 0 | 0.00000 |
| HETATM | 392 | Pt | 2.06157  | 14.85612 | 28.94883 | Pt | 0 | 0 | 0.00000 |
| HETATM | 393 | Pt | 6.89625  | 20.43854 | 28.94883 | Pt | 0 | 0 | 0.00000 |
| HETATM | 394 | Pt | 6.89622  | 23.22976 | 28.94880 | Pt | 0 | 0 | 0.00000 |
| HETATM | 395 | Pt | 6.89622  | 26.02096 | 28.94880 | Pt | 0 | 0 | 0.00000 |
| HETATM | 396 | Pt | 6.89623  | 6.48249  | 28.94880 | Pt | 0 | 0 | 0.00000 |
| HETATM | 397 | Pt | 6.89623  | 9.27370  | 28.94880 | Pt | 0 | 0 | 0.00000 |
| HETATM | 398 | Pt | 6.89622  | 12.06492 | 28.94880 | Pt | 0 | 0 | 0.00000 |
| HETATM | 399 | Pt | 6.89622  | 14.85612 | 28.94881 | Pt | 0 | 0 | 0.00000 |
| HETATM | 400 | Pt | 6.89624  | 17.64733 | 28.94883 | Pt | 0 | 0 | 0.00000 |
| HETATM | 401 | Pt | 11.73071 | 23.22976 | 28.94892 | Pt | 0 | 0 | 0.00000 |
| HETATM | 402 | Pt | 11.73071 | 26.02097 | 28.94891 | Pt | 0 | 0 | 0.00000 |
| HETATM | 403 | Pt | 11.73071 | 28.81217 | 28.94890 | Pt | 0 | 0 | 0.00000 |
| HETATM | 404 | Pt | 11.73070 | 9.27371  | 28.94888 | Pt | 0 | 0 | 0.00000 |
| HETATM | 405 | Pt | 11.73069 | 12.06491 | 28.94888 | Pt | 0 | 0 | 0.00000 |
| HETATM | 406 | Pt | 11.73071 | 14.85611 | 28.94891 | Pt | 0 | 0 | 0.00000 |
| HETATM | 407 | Pt | 11.73072 | 17.64732 | 28.94895 | Pt | 0 | 0 | 0.00000 |
| HETATM | 408 | Pt | 11.73072 | 20.43854 | 28.94894 | Pt | 0 | 0 | 0.00000 |
| HETATM | 409 | Pt | 16.56521 | 26.02096 | 28.94892 | Pt | 0 | 0 | 0.00000 |
| HETATM | 410 | Pt | 16.56521 | 28.81218 | 28.94891 | Pt | 0 | 0 | 0.00000 |
| HETATM | 411 | Pt | 16.56521 | 31.60339 | 28.94890 | Pt | 0 | 0 | 0.00000 |
| HETATM | 412 | Pt | 16.56522 | 12.06491 | 28.94892 | Pt | 0 | 0 | 0.00000 |
| HETATM | 413 | Pt | 16.56523 | 14.85613 | 28.94894 | Pt | 0 | 0 | 0.00000 |
| HETATM | 414 | Pt | 16.56522 | 17.64733 | 28.94894 | Pt | 0 | 0 | 0.00000 |
| HETATM | 415 | Pt | 16.56520 | 20.43854 | 28.94893 | Pt | 0 | 0 | 0.00000 |
| HETATM | 416 | Pt | 16.56520 | 23.22975 | 28.94892 | Pt | 0 | 0 | 0.00000 |
| HETATM | 417 | Pt | 4.43555  | 19.04294 | 28.65132 | Pt | 0 | 0 | 0.00000 |
| HETATM | 418 | Pt | 4.43558  | 21.83415 | 28.65131 | Pt | 0 | 0 | 0.00000 |
| HETATM | 419 | Pt | 4.43558  | 24.62536 | 28.65130 | Pt | 0 | 0 | 0.00000 |
| HETATM | 420 | Pt | 4.43555  | 5.08689  | 28.65128 | Pt | 0 | 0 | 0.00000 |
| HETATM | 421 | Pt | 4.43553  | 7.87810  | 28.65125 | Pt | 0 | 0 | 0.00000 |
| HETATM | 422 | Pt | 4.43554  | 10.66931 | 28.65125 | Pt | 0 | 0 | 0.00000 |
| HETATM | 423 | Pt | 4.43555  | 13.46051 | 28.65128 | Pt | 0 | 0 | 0.00000 |
| HETATM | 424 | Pt | 4.43555  | 16.25172 | 28.65131 | Pt | 0 | 0 | 0.00000 |
| HETATM | 425 | Pt | 9.27008  | 21.83416 | 28.65128 | Pt | 0 | 0 | 0.00000 |
| HETATM | 426 | Pt | 9.27006  | 24.62537 | 28.65125 | Pt | 0 | 0 | 0.00000 |
| HETATM | 427 | Pt | 9.27003  | 27.41657 | 28.65123 | Pt | 0 | 0 | 0.00000 |
| HETATM | 428 | Pt | 9.27003  | 7.87810  | 28.65122 | Pt | 0 | 0 | 0.00000 |
| HETATM | 429 | Pt | 9.27005  | 10.66930 | 28.65123 | Pt | 0 | 0 | 0.00000 |
| HETATM | 430 | Pt | 9.27007  | 13.46050 | 28.65124 | Pt | 0 | 0 | 0.00000 |
| HETATM | 431 | Pt | 9.27007  | 16.25172 | 28.65127 | Pt | 0 | 0 | 0.00000 |
| HETATM | 432 | Pt | 9.27008  | 19.04294 | 28.65129 | Pt | 0 | 0 | 0.00000 |
| HETATM | 433 | Pt | 14.10467 | 24.62536 | 28.65122 | Pt | 0 | 0 | 0.00000 |
| HETATM | 434 | Pt | 14.10466 | 27.41657 | 28.65122 | Pt | 0 | 0 | 0.00000 |
| HETATM | 435 | Pt | 14.10467 | 30.20778 | 28.65122 | Pt | 0 | 0 | 0.00000 |

|        |     |    |          |          |          |    |   |   |         |
|--------|-----|----|----------|----------|----------|----|---|---|---------|
| HETATM | 436 | Pt | 14.10468 | 10.66930 | 28.65122 | Pt | 0 | 0 | 0.00000 |
| HETATM | 437 | Pt | 14.10468 | 13.46051 | 28.65122 | Pt | 0 | 0 | 0.00000 |
| HETATM | 438 | Pt | 14.10468 | 16.25172 | 28.65124 | Pt | 0 | 0 | 0.00000 |
| HETATM | 439 | Pt | 14.10469 | 19.04294 | 28.65126 | Pt | 0 | 0 | 0.00000 |
| HETATM | 440 | Pt | 14.10469 | 21.83415 | 28.65123 | Pt | 0 | 0 | 0.00000 |
| HETATM | 441 | Pt | 18.93909 | 27.41658 | 28.65124 | Pt | 0 | 0 | 0.00000 |
| HETATM | 442 | Pt | 18.93908 | 30.20780 | 28.65124 | Pt | 0 | 0 | 0.00000 |
| HETATM | 443 | Pt | 18.93908 | 32.99900 | 28.65124 | Pt | 0 | 0 | 0.00000 |
| HETATM | 444 | Pt | 18.93908 | 13.46051 | 28.65123 | Pt | 0 | 0 | 0.00000 |
| HETATM | 445 | Pt | 18.93908 | 16.25171 | 28.65123 | Pt | 0 | 0 | 0.00000 |
| HETATM | 446 | Pt | 18.93909 | 19.04293 | 28.65121 | Pt | 0 | 0 | 0.00000 |
| HETATM | 447 | Pt | 18.93910 | 21.83414 | 28.65121 | Pt | 0 | 0 | 0.00000 |
| HETATM | 448 | Pt | 18.93910 | 24.62535 | 28.65122 | Pt | 0 | 0 | 0.00000 |
| HETATM | 449 | O  | 3.04164  | 19.04294 | 29.95468 | O  | 0 | 0 | 0.00000 |
| HETATM | 450 | O  | 3.04164  | 21.83413 | 29.95469 | O  | 0 | 0 | 0.00000 |
| HETATM | 451 | O  | 3.04165  | 2.29566  | 29.95468 | O  | 0 | 0 | 0.00000 |
| HETATM | 452 | O  | 3.04166  | 5.08688  | 29.95466 | O  | 0 | 0 | 0.00000 |
| HETATM | 453 | O  | 3.04165  | 7.87811  | 29.95465 | O  | 0 | 0 | 0.00000 |
| HETATM | 454 | O  | 3.04164  | 10.66931 | 29.95466 | O  | 0 | 0 | 0.00000 |
| HETATM | 455 | O  | 3.04164  | 13.46052 | 29.95466 | O  | 0 | 0 | 0.00000 |
| HETATM | 456 | O  | 3.04164  | 16.25174 | 29.95467 | O  | 0 | 0 | 0.00000 |
| HETATM | 457 | O  | 7.87614  | 21.83413 | 29.95466 | O  | 0 | 0 | 0.00000 |
| HETATM | 458 | O  | 7.87615  | 24.62532 | 29.95465 | O  | 0 | 0 | 0.00000 |
| HETATM | 459 | O  | 7.87615  | 5.08686  | 29.95461 | O  | 0 | 0 | 0.00000 |
| HETATM | 460 | O  | 7.87614  | 7.87809  | 29.95458 | O  | 0 | 0 | 0.00000 |
| HETATM | 461 | O  | 7.87614  | 10.66933 | 29.95460 | O  | 0 | 0 | 0.00000 |
| HETATM | 462 | O  | 7.87615  | 13.46055 | 29.95464 | O  | 0 | 0 | 0.00000 |
| HETATM | 463 | O  | 7.87615  | 16.25175 | 29.95465 | O  | 0 | 0 | 0.00000 |
| HETATM | 464 | O  | 7.87615  | 19.04294 | 29.95465 | O  | 0 | 0 | 0.00000 |
| HETATM | 465 | O  | 12.71078 | 24.62531 | 29.95471 | O  | 0 | 0 | 0.00000 |
| HETATM | 466 | O  | 12.71077 | 27.41653 | 29.95467 | O  | 0 | 0 | 0.00000 |
| HETATM | 467 | O  | 12.71077 | 7.87810  | 29.95466 | O  | 0 | 0 | 0.00000 |
| HETATM | 468 | O  | 12.71078 | 10.66935 | 29.95468 | O  | 0 | 0 | 0.00000 |
| HETATM | 469 | O  | 12.71078 | 13.46056 | 29.95470 | O  | 0 | 0 | 0.00000 |
| HETATM | 470 | O  | 12.71079 | 16.25175 | 29.95470 | O  | 0 | 0 | 0.00000 |
| HETATM | 471 | O  | 12.71079 | 19.04294 | 29.95471 | O  | 0 | 0 | 0.00000 |
| HETATM | 472 | O  | 12.71078 | 21.83413 | 29.95473 | O  | 0 | 0 | 0.00000 |
| HETATM | 473 | O  | 17.54524 | 27.41655 | 29.95467 | O  | 0 | 0 | 0.00000 |
| HETATM | 474 | O  | 17.54523 | 30.20779 | 29.95467 | O  | 0 | 0 | 0.00000 |
| HETATM | 475 | O  | 17.54524 | 10.66933 | 29.95468 | O  | 0 | 0 | 0.00000 |
| HETATM | 476 | O  | 17.54523 | 13.46052 | 29.95467 | O  | 0 | 0 | 0.00000 |
| HETATM | 477 | O  | 17.54525 | 16.25174 | 29.95467 | O  | 0 | 0 | 0.00000 |
| HETATM | 478 | O  | 17.54526 | 19.04295 | 29.95469 | O  | 0 | 0 | 0.00000 |
| HETATM | 479 | O  | 17.54526 | 21.83414 | 29.95470 | O  | 0 | 0 | 0.00000 |
| HETATM | 480 | O  | 17.54525 | 24.62533 | 29.95468 | O  | 0 | 0 | 0.00000 |

UNIT ENERGY kcal  
ENERGY -60149.298597  
END

XTLGRF 200  
DESCRP TS  
REMARK Pt111\_0.50ML\_8x8x7\_30.0\_vac hcp-displacement  
FIXATOMS 1 128  
CRYSTX 22.32968 22.32968 43.67409 90.00000 90.00000 60.00000  
FORMAT ATOM (a6,lx,i5,lx,a5,lx,a3,lx,a1,lx,a5,3f10.5,lx,a5,i3,i2,lx,f8.5)  
HETATM 1 Pt 2.02016 17.64733 14.95089 Pt 0 0 0.00000  
HETATM 2 Pt 2.02016 20.43854 14.95089 Pt 0 0 0.00000  
HETATM 3 Pt 2.02016 23.22975 14.95089 Pt 0 0 0.00000  
HETATM 4 Pt 2.02016 3.69128 14.95089 Pt 0 0 0.00000  
HETATM 5 Pt 2.02016 6.48249 14.95089 Pt 0 0 0.00000  
HETATM 6 Pt 2.02016 9.27370 14.95089 Pt 0 0 0.00000  
HETATM 7 Pt 2.02016 12.06491 14.95089 Pt 0 0 0.00000  
HETATM 8 Pt 2.02016 14.85612 14.95089 Pt 0 0 0.00000



|        |    |    |          |          |          |    |   |   |         |
|--------|----|----|----------|----------|----------|----|---|---|---------|
| HETATM | 9  | Pt | 6.85468  | 20.43854 | 14.95089 | Pt | 0 | 0 | 0.00000 |
| HETATM | 10 | Pt | 6.85468  | 23.22975 | 14.95089 | Pt | 0 | 0 | 0.00000 |
| HETATM | 11 | Pt | 6.85468  | 26.02096 | 14.95089 | Pt | 0 | 0 | 0.00000 |
| HETATM | 12 | Pt | 6.85468  | 6.48249  | 14.95089 | Pt | 0 | 0 | 0.00000 |
| HETATM | 13 | Pt | 6.85468  | 9.27370  | 14.95089 | Pt | 0 | 0 | 0.00000 |
| HETATM | 14 | Pt | 6.85468  | 12.06491 | 14.95089 | Pt | 0 | 0 | 0.00000 |
| HETATM | 15 | Pt | 6.85468  | 14.85612 | 14.95089 | Pt | 0 | 0 | 0.00000 |
| HETATM | 16 | Pt | 6.85468  | 17.64733 | 14.95089 | Pt | 0 | 0 | 0.00000 |
| HETATM | 17 | Pt | 11.68920 | 23.22975 | 14.95089 | Pt | 0 | 0 | 0.00000 |
| HETATM | 18 | Pt | 11.68920 | 26.02096 | 14.95089 | Pt | 0 | 0 | 0.00000 |
| HETATM | 19 | Pt | 11.68920 | 28.81217 | 14.95089 | Pt | 0 | 0 | 0.00000 |
| HETATM | 20 | Pt | 11.68920 | 9.27370  | 14.95089 | Pt | 0 | 0 | 0.00000 |
| HETATM | 21 | Pt | 11.68920 | 12.06491 | 14.95089 | Pt | 0 | 0 | 0.00000 |
| HETATM | 22 | Pt | 11.68920 | 14.85612 | 14.95089 | Pt | 0 | 0 | 0.00000 |
| HETATM | 23 | Pt | 11.68920 | 17.64733 | 14.95089 | Pt | 0 | 0 | 0.00000 |
| HETATM | 24 | Pt | 11.68920 | 20.43854 | 14.95089 | Pt | 0 | 0 | 0.00000 |
| HETATM | 25 | Pt | 16.52371 | 26.02096 | 14.95089 | Pt | 0 | 0 | 0.00000 |
| HETATM | 26 | Pt | 16.52371 | 28.81217 | 14.95089 | Pt | 0 | 0 | 0.00000 |
| HETATM | 27 | Pt | 16.52371 | 31.60338 | 14.95089 | Pt | 0 | 0 | 0.00000 |
| HETATM | 28 | Pt | 16.52371 | 12.06491 | 14.95089 | Pt | 0 | 0 | 0.00000 |
| HETATM | 29 | Pt | 16.52371 | 14.85612 | 14.95089 | Pt | 0 | 0 | 0.00000 |
| HETATM | 30 | Pt | 16.52371 | 17.64733 | 14.95089 | Pt | 0 | 0 | 0.00000 |
| HETATM | 31 | Pt | 16.52371 | 20.43854 | 14.95089 | Pt | 0 | 0 | 0.00000 |
| HETATM | 32 | Pt | 16.52371 | 23.22975 | 14.95089 | Pt | 0 | 0 | 0.00000 |
| HETATM | 33 | Pt | 4.43742  | 19.04294 | 14.95089 | Pt | 0 | 0 | 0.00000 |
| HETATM | 34 | Pt | 4.43742  | 21.83415 | 14.95089 | Pt | 0 | 0 | 0.00000 |
| HETATM | 35 | Pt | 4.43742  | 24.62536 | 14.95089 | Pt | 0 | 0 | 0.00000 |
| HETATM | 36 | Pt | 4.43742  | 5.08689  | 14.95089 | Pt | 0 | 0 | 0.00000 |
| HETATM | 37 | Pt | 4.43742  | 7.87810  | 14.95089 | Pt | 0 | 0 | 0.00000 |
| HETATM | 38 | Pt | 4.43742  | 10.66931 | 14.95089 | Pt | 0 | 0 | 0.00000 |
| HETATM | 39 | Pt | 4.43742  | 13.46052 | 14.95089 | Pt | 0 | 0 | 0.00000 |
| HETATM | 40 | Pt | 4.43742  | 16.25173 | 14.95089 | Pt | 0 | 0 | 0.00000 |
| HETATM | 41 | Pt | 9.27194  | 21.83415 | 14.95089 | Pt | 0 | 0 | 0.00000 |
| HETATM | 42 | Pt | 9.27194  | 24.62536 | 14.95089 | Pt | 0 | 0 | 0.00000 |
| HETATM | 43 | Pt | 9.27194  | 27.41657 | 14.95089 | Pt | 0 | 0 | 0.00000 |
| HETATM | 44 | Pt | 9.27194  | 7.87810  | 14.95089 | Pt | 0 | 0 | 0.00000 |
| HETATM | 45 | Pt | 9.27194  | 10.66931 | 14.95089 | Pt | 0 | 0 | 0.00000 |
| HETATM | 46 | Pt | 9.27194  | 13.46052 | 14.95089 | Pt | 0 | 0 | 0.00000 |
| HETATM | 47 | Pt | 9.27194  | 16.25173 | 14.95089 | Pt | 0 | 0 | 0.00000 |
| HETATM | 48 | Pt | 9.27194  | 19.04294 | 14.95089 | Pt | 0 | 0 | 0.00000 |
| HETATM | 49 | Pt | 14.10646 | 24.62536 | 14.95089 | Pt | 0 | 0 | 0.00000 |
| HETATM | 50 | Pt | 14.10646 | 27.41657 | 14.95089 | Pt | 0 | 0 | 0.00000 |
| HETATM | 51 | Pt | 14.10646 | 30.20778 | 14.95089 | Pt | 0 | 0 | 0.00000 |
| HETATM | 52 | Pt | 14.10646 | 10.66931 | 14.95089 | Pt | 0 | 0 | 0.00000 |
| HETATM | 53 | Pt | 14.10646 | 13.46052 | 14.95089 | Pt | 0 | 0 | 0.00000 |
| HETATM | 54 | Pt | 14.10646 | 16.25173 | 14.95089 | Pt | 0 | 0 | 0.00000 |
| HETATM | 55 | Pt | 14.10646 | 19.04294 | 14.95089 | Pt | 0 | 0 | 0.00000 |
| HETATM | 56 | Pt | 14.10646 | 21.83415 | 14.95089 | Pt | 0 | 0 | 0.00000 |
| HETATM | 57 | Pt | 18.94097 | 27.41657 | 14.95089 | Pt | 0 | 0 | 0.00000 |
| HETATM | 58 | Pt | 18.94097 | 30.20778 | 14.95089 | Pt | 0 | 0 | 0.00000 |
| HETATM | 59 | Pt | 18.94097 | 32.99899 | 14.95089 | Pt | 0 | 0 | 0.00000 |
| HETATM | 60 | Pt | 18.94097 | 13.46052 | 14.95089 | Pt | 0 | 0 | 0.00000 |
| HETATM | 61 | Pt | 18.94097 | 16.25173 | 14.95089 | Pt | 0 | 0 | 0.00000 |
| HETATM | 62 | Pt | 18.94097 | 19.04294 | 14.95089 | Pt | 0 | 0 | 0.00000 |
| HETATM | 63 | Pt | 18.94097 | 21.83415 | 14.95089 | Pt | 0 | 0 | 0.00000 |
| HETATM | 64 | Pt | 18.94097 | 24.62536 | 14.95089 | Pt | 0 | 0 | 0.00000 |
| HETATM | 65 | Pt | 2.82591  | 19.04294 | 17.22991 | Pt | 0 | 0 | 0.00000 |
| HETATM | 66 | Pt | 2.82591  | 21.83415 | 17.22991 | Pt | 0 | 0 | 0.00000 |
| HETATM | 67 | Pt | 2.82591  | 2.29568  | 17.22991 | Pt | 0 | 0 | 0.00000 |
| HETATM | 68 | Pt | 2.82591  | 5.08689  | 17.22991 | Pt | 0 | 0 | 0.00000 |
| HETATM | 69 | Pt | 2.82591  | 7.87810  | 17.22991 | Pt | 0 | 0 | 0.00000 |
| HETATM | 70 | Pt | 2.82591  | 10.66931 | 17.22991 | Pt | 0 | 0 | 0.00000 |
| HETATM | 71 | Pt | 2.82591  | 13.46052 | 17.22991 | Pt | 0 | 0 | 0.00000 |

|        |     |    |          |          |          |    |   |   |         |
|--------|-----|----|----------|----------|----------|----|---|---|---------|
| HETATM | 72  | Pt | 2.82591  | 16.25173 | 17.22991 | Pt | 0 | 0 | 0.00000 |
| HETATM | 73  | Pt | 7.66043  | 21.83415 | 17.22991 | Pt | 0 | 0 | 0.00000 |
| HETATM | 74  | Pt | 7.66043  | 24.62536 | 17.22991 | Pt | 0 | 0 | 0.00000 |
| HETATM | 75  | Pt | 7.66043  | 5.08689  | 17.22991 | Pt | 0 | 0 | 0.00000 |
| HETATM | 76  | Pt | 7.66043  | 7.87810  | 17.22991 | Pt | 0 | 0 | 0.00000 |
| HETATM | 77  | Pt | 7.66043  | 10.66931 | 17.22991 | Pt | 0 | 0 | 0.00000 |
| HETATM | 78  | Pt | 7.66043  | 13.46052 | 17.22991 | Pt | 0 | 0 | 0.00000 |
| HETATM | 79  | Pt | 7.66043  | 16.25173 | 17.22991 | Pt | 0 | 0 | 0.00000 |
| HETATM | 80  | Pt | 7.66043  | 19.04294 | 17.22991 | Pt | 0 | 0 | 0.00000 |
| HETATM | 81  | Pt | 12.49495 | 24.62536 | 17.22991 | Pt | 0 | 0 | 0.00000 |
| HETATM | 82  | Pt | 12.49495 | 27.41657 | 17.22991 | Pt | 0 | 0 | 0.00000 |
| HETATM | 83  | Pt | 12.49495 | 7.87810  | 17.22991 | Pt | 0 | 0 | 0.00000 |
| HETATM | 84  | Pt | 12.49495 | 10.66931 | 17.22991 | Pt | 0 | 0 | 0.00000 |
| HETATM | 85  | Pt | 12.49495 | 13.46052 | 17.22991 | Pt | 0 | 0 | 0.00000 |
| HETATM | 86  | Pt | 12.49495 | 16.25173 | 17.22991 | Pt | 0 | 0 | 0.00000 |
| HETATM | 87  | Pt | 12.49495 | 19.04294 | 17.22991 | Pt | 0 | 0 | 0.00000 |
| HETATM | 88  | Pt | 12.49495 | 21.83415 | 17.22991 | Pt | 0 | 0 | 0.00000 |
| HETATM | 89  | Pt | 17.32946 | 27.41657 | 17.22991 | Pt | 0 | 0 | 0.00000 |
| HETATM | 90  | Pt | 17.32946 | 30.20778 | 17.22991 | Pt | 0 | 0 | 0.00000 |
| HETATM | 91  | Pt | 17.32946 | 10.66931 | 17.22991 | Pt | 0 | 0 | 0.00000 |
| HETATM | 92  | Pt | 17.32946 | 13.46052 | 17.22991 | Pt | 0 | 0 | 0.00000 |
| HETATM | 93  | Pt | 17.32946 | 16.25173 | 17.22991 | Pt | 0 | 0 | 0.00000 |
| HETATM | 94  | Pt | 17.32946 | 19.04294 | 17.22991 | Pt | 0 | 0 | 0.00000 |
| HETATM | 95  | Pt | 17.32946 | 21.83415 | 17.22991 | Pt | 0 | 0 | 0.00000 |
| HETATM | 96  | Pt | 17.32946 | 24.62536 | 17.22991 | Pt | 0 | 0 | 0.00000 |
| HETATM | 97  | Pt | 5.24317  | 20.43854 | 17.22991 | Pt | 0 | 0 | 0.00000 |
| HETATM | 98  | Pt | 5.24317  | 23.22975 | 17.22991 | Pt | 0 | 0 | 0.00000 |
| HETATM | 99  | Pt | 5.24317  | 3.69128  | 17.22991 | Pt | 0 | 0 | 0.00000 |
| HETATM | 100 | Pt | 5.24317  | 6.48249  | 17.22991 | Pt | 0 | 0 | 0.00000 |
| HETATM | 101 | Pt | 5.24317  | 9.27370  | 17.22991 | Pt | 0 | 0 | 0.00000 |
| HETATM | 102 | Pt | 5.24317  | 12.06491 | 17.22991 | Pt | 0 | 0 | 0.00000 |
| HETATM | 103 | Pt | 5.24317  | 14.85612 | 17.22991 | Pt | 0 | 0 | 0.00000 |
| HETATM | 104 | Pt | 5.24317  | 17.64733 | 17.22991 | Pt | 0 | 0 | 0.00000 |
| HETATM | 105 | Pt | 10.07769 | 23.22975 | 17.22991 | Pt | 0 | 0 | 0.00000 |
| HETATM | 106 | Pt | 10.07769 | 26.02096 | 17.22991 | Pt | 0 | 0 | 0.00000 |
| HETATM | 107 | Pt | 10.07769 | 6.48249  | 17.22991 | Pt | 0 | 0 | 0.00000 |
| HETATM | 108 | Pt | 10.07769 | 9.27370  | 17.22991 | Pt | 0 | 0 | 0.00000 |
| HETATM | 109 | Pt | 10.07769 | 12.06491 | 17.22991 | Pt | 0 | 0 | 0.00000 |
| HETATM | 110 | Pt | 10.07769 | 14.85612 | 17.22991 | Pt | 0 | 0 | 0.00000 |
| HETATM | 111 | Pt | 10.07769 | 17.64733 | 17.22991 | Pt | 0 | 0 | 0.00000 |
| HETATM | 112 | Pt | 10.07769 | 20.43854 | 17.22991 | Pt | 0 | 0 | 0.00000 |
| HETATM | 113 | Pt | 14.91221 | 26.02096 | 17.22991 | Pt | 0 | 0 | 0.00000 |
| HETATM | 114 | Pt | 14.91221 | 28.81217 | 17.22991 | Pt | 0 | 0 | 0.00000 |
| HETATM | 115 | Pt | 14.91221 | 9.27370  | 17.22991 | Pt | 0 | 0 | 0.00000 |
| HETATM | 116 | Pt | 14.91221 | 12.06491 | 17.22991 | Pt | 0 | 0 | 0.00000 |
| HETATM | 117 | Pt | 14.91221 | 14.85612 | 17.22991 | Pt | 0 | 0 | 0.00000 |
| HETATM | 118 | Pt | 14.91221 | 17.64733 | 17.22991 | Pt | 0 | 0 | 0.00000 |
| HETATM | 119 | Pt | 14.91221 | 20.43854 | 17.22991 | Pt | 0 | 0 | 0.00000 |
| HETATM | 120 | Pt | 14.91221 | 23.22975 | 17.22991 | Pt | 0 | 0 | 0.00000 |
| HETATM | 121 | Pt | 0.40865  | 17.64733 | 17.22991 | Pt | 0 | 0 | 0.00000 |
| HETATM | 122 | Pt | 0.40865  | 20.43854 | 17.22991 | Pt | 0 | 0 | 0.00000 |
| HETATM | 123 | Pt | 0.40865  | 0.90007  | 17.22991 | Pt | 0 | 0 | 0.00000 |
| HETATM | 124 | Pt | 0.40865  | 3.69128  | 17.22991 | Pt | 0 | 0 | 0.00000 |
| HETATM | 125 | Pt | 0.40865  | 6.48249  | 17.22991 | Pt | 0 | 0 | 0.00000 |
| HETATM | 126 | Pt | 0.40865  | 9.27370  | 17.22991 | Pt | 0 | 0 | 0.00000 |
| HETATM | 127 | Pt | 0.40865  | 12.06491 | 17.22991 | Pt | 0 | 0 | 0.00000 |
| HETATM | 128 | Pt | 0.40865  | 14.85612 | 17.22991 | Pt | 0 | 0 | 0.00000 |
| HETATM | 129 | Pt | 3.63051  | 20.43845 | 19.50866 | Pt | 0 | 0 | 0.00000 |
| HETATM | 130 | Pt | 3.63105  | 23.22966 | 19.50801 | Pt | 0 | 0 | 0.00000 |
| HETATM | 131 | Pt | 3.63105  | 3.69136  | 19.50800 | Pt | 0 | 0 | 0.00000 |
| HETATM | 132 | Pt | 3.63051  | 6.48259  | 19.50866 | Pt | 0 | 0 | 0.00000 |
| HETATM | 133 | Pt | 3.63053  | 9.27376  | 19.50865 | Pt | 0 | 0 | 0.00000 |
| HETATM | 134 | Pt | 3.63093  | 12.06495 | 19.50828 | Pt | 0 | 0 | 0.00000 |

|        |     |    |          |          |          |    |   |   |         |
|--------|-----|----|----------|----------|----------|----|---|---|---------|
| HETATM | 135 | Pt | 3.63093  | 14.85609 | 19.50829 | Pt | 0 | 0 | 0.00000 |
| HETATM | 136 | Pt | 3.63052  | 17.64729 | 19.50866 | Pt | 0 | 0 | 0.00000 |
| HETATM | 137 | Pt | 8.46530  | 23.22975 | 19.50843 | Pt | 0 | 0 | 0.00000 |
| HETATM | 138 | Pt | 8.46530  | 26.02092 | 19.50843 | Pt | 0 | 0 | 0.00000 |
| HETATM | 139 | Pt | 8.46470  | 6.48225  | 19.50859 | Pt | 0 | 0 | 0.00000 |
| HETATM | 140 | Pt | 8.46444  | 9.27313  | 19.50835 | Pt | 0 | 0 | 0.00000 |
| HETATM | 141 | Pt | 8.46475  | 12.06465 | 19.50822 | Pt | 0 | 0 | 0.00000 |
| HETATM | 142 | Pt | 8.46474  | 14.85643 | 19.50822 | Pt | 0 | 0 | 0.00000 |
| HETATM | 143 | Pt | 8.46441  | 17.64792 | 19.50835 | Pt | 0 | 0 | 0.00000 |
| HETATM | 144 | Pt | 8.46469  | 20.43877 | 19.50859 | Pt | 0 | 0 | 0.00000 |
| HETATM | 145 | Pt | 13.29954 | 26.02118 | 19.50777 | Pt | 0 | 0 | 0.00000 |
| HETATM | 146 | Pt | 13.29921 | 28.81244 | 19.50861 | Pt | 0 | 0 | 0.00000 |
| HETATM | 147 | Pt | 13.29900 | 9.27335  | 19.50835 | Pt | 0 | 0 | 0.00000 |
| HETATM | 148 | Pt | 13.29950 | 12.06450 | 19.50639 | Pt | 0 | 0 | 0.00000 |
| HETATM | 149 | Pt | 13.29949 | 14.85659 | 19.50638 | Pt | 0 | 0 | 0.00000 |
| HETATM | 150 | Pt | 13.29897 | 17.64771 | 19.50834 | Pt | 0 | 0 | 0.00000 |
| HETATM | 151 | Pt | 13.29918 | 20.43826 | 19.50860 | Pt | 0 | 0 | 0.00000 |
| HETATM | 152 | Pt | 13.29953 | 23.22949 | 19.50776 | Pt | 0 | 0 | 0.00000 |
| HETATM | 153 | Pt | 18.13389 | 28.81228 | 19.50810 | Pt | 0 | 0 | 0.00000 |
| HETATM | 154 | Pt | 18.13372 | 31.60325 | 19.50826 | Pt | 0 | 0 | 0.00000 |
| HETATM | 155 | Pt | 18.13474 | 12.06477 | 19.50696 | Pt | 0 | 0 | 0.00000 |
| HETATM | 156 | Pt | 18.13473 | 14.85629 | 19.50695 | Pt | 0 | 0 | 0.00000 |
| HETATM | 157 | Pt | 18.13370 | 17.64748 | 19.50824 | Pt | 0 | 0 | 0.00000 |
| HETATM | 158 | Pt | 18.13387 | 20.43843 | 19.50808 | Pt | 0 | 0 | 0.00000 |
| HETATM | 159 | Pt | 18.13433 | 23.22962 | 19.50741 | Pt | 0 | 0 | 0.00000 |
| HETATM | 160 | Pt | 18.13434 | 26.02107 | 19.50741 | Pt | 0 | 0 | 0.00000 |
| HETATM | 161 | Pt | 6.04855  | 21.83416 | 19.50991 | Pt | 0 | 0 | 0.00000 |
| HETATM | 162 | Pt | 6.04900  | 24.62534 | 19.50961 | Pt | 0 | 0 | 0.00000 |
| HETATM | 163 | Pt | 6.04855  | 5.08685  | 19.50991 | Pt | 0 | 0 | 0.00000 |
| HETATM | 164 | Pt | 6.04817  | 7.87806  | 19.51022 | Pt | 0 | 0 | 0.00000 |
| HETATM | 165 | Pt | 6.04859  | 10.66936 | 19.51031 | Pt | 0 | 0 | 0.00000 |
| HETATM | 166 | Pt | 6.04882  | 13.46053 | 19.51039 | Pt | 0 | 0 | 0.00000 |
| HETATM | 167 | Pt | 6.04859  | 16.25170 | 19.51031 | Pt | 0 | 0 | 0.00000 |
| HETATM | 168 | Pt | 6.04817  | 19.04297 | 19.51023 | Pt | 0 | 0 | 0.00000 |
| HETATM | 169 | Pt | 10.88325 | 24.62535 | 19.50967 | Pt | 0 | 0 | 0.00000 |
| HETATM | 170 | Pt | 10.88293 | 27.41666 | 19.50982 | Pt | 0 | 0 | 0.00000 |
| HETATM | 171 | Pt | 10.88236 | 7.87771  | 19.50976 | Pt | 0 | 0 | 0.00000 |
| HETATM | 172 | Pt | 10.88229 | 10.66852 | 19.50859 | Pt | 0 | 0 | 0.00000 |
| HETATM | 173 | Pt | 10.88253 | 13.46052 | 19.50782 | Pt | 0 | 0 | 0.00000 |
| HETATM | 174 | Pt | 10.88229 | 16.25251 | 19.50859 | Pt | 0 | 0 | 0.00000 |
| HETATM | 175 | Pt | 10.88235 | 19.04333 | 19.50975 | Pt | 0 | 0 | 0.00000 |
| HETATM | 176 | Pt | 10.88292 | 21.83404 | 19.50982 | Pt | 0 | 0 | 0.00000 |
| HETATM | 177 | Pt | 15.71727 | 27.41673 | 19.50880 | Pt | 0 | 0 | 0.00000 |
| HETATM | 178 | Pt | 15.71682 | 30.20778 | 19.50965 | Pt | 0 | 0 | 0.00000 |
| HETATM | 179 | Pt | 15.71723 | 10.66900 | 19.50862 | Pt | 0 | 0 | 0.00000 |
| HETATM | 180 | Pt | 15.71802 | 13.46051 | 19.50699 | Pt | 0 | 0 | 0.00000 |
| HETATM | 181 | Pt | 15.71723 | 16.25202 | 19.50861 | Pt | 0 | 0 | 0.00000 |
| HETATM | 182 | Pt | 15.71680 | 19.04293 | 19.50964 | Pt | 0 | 0 | 0.00000 |
| HETATM | 183 | Pt | 15.71725 | 21.83401 | 19.50878 | Pt | 0 | 0 | 0.00000 |
| HETATM | 184 | Pt | 15.71756 | 24.62537 | 19.50830 | Pt | 0 | 0 | 0.00000 |
| HETATM | 185 | Pt | 1.21370  | 19.04294 | 19.50977 | Pt | 0 | 0 | 0.00000 |
| HETATM | 186 | Pt | 1.21412  | 21.83392 | 19.50924 | Pt | 0 | 0 | 0.00000 |
| HETATM | 187 | Pt | 1.21469  | 2.29566  | 19.50857 | Pt | 0 | 0 | 0.00000 |
| HETATM | 188 | Pt | 1.21411  | 5.08708  | 19.50923 | Pt | 0 | 0 | 0.00000 |
| HETATM | 189 | Pt | 1.21369  | 7.87809  | 19.50975 | Pt | 0 | 0 | 0.00000 |
| HETATM | 190 | Pt | 1.21405  | 10.66922 | 19.50922 | Pt | 0 | 0 | 0.00000 |
| HETATM | 191 | Pt | 1.21426  | 13.46054 | 19.50882 | Pt | 0 | 0 | 0.00000 |
| HETATM | 192 | Pt | 1.21407  | 16.25185 | 19.50924 | Pt | 0 | 0 | 0.00000 |
| HETATM | 193 | Pt | 2.01868  | 17.64743 | 21.79057 | Pt | 0 | 0 | 0.00000 |
| HETATM | 194 | Pt | 2.01875  | 20.43839 | 21.79073 | Pt | 0 | 0 | 0.00000 |
| HETATM | 195 | Pt | 2.01993  | 23.22947 | 21.78895 | Pt | 0 | 0 | 0.00000 |
| HETATM | 196 | Pt | 2.01992  | 3.69157  | 21.78895 | Pt | 0 | 0 | 0.00000 |
| HETATM | 197 | Pt | 2.01871  | 6.48265  | 21.79072 | Pt | 0 | 0 | 0.00000 |

|        |     |    |          |          |          |    |   |   |         |
|--------|-----|----|----------|----------|----------|----|---|---|---------|
| HETATM | 198 | Pt | 2.01866  | 9.27360  | 21.79056 | Pt | 0 | 0 | 0.00000 |
| HETATM | 199 | Pt | 2.01940  | 12.06496 | 21.78928 | Pt | 0 | 0 | 0.00000 |
| HETATM | 200 | Pt | 2.01941  | 14.85606 | 21.78929 | Pt | 0 | 0 | 0.00000 |
| HETATM | 201 | Pt | 6.85320  | 20.43848 | 21.79140 | Pt | 0 | 0 | 0.00000 |
| HETATM | 202 | Pt | 6.85440  | 23.22964 | 21.79076 | Pt | 0 | 0 | 0.00000 |
| HETATM | 203 | Pt | 6.85439  | 26.02109 | 21.79076 | Pt | 0 | 0 | 0.00000 |
| HETATM | 204 | Pt | 6.85316  | 6.48256  | 21.79138 | Pt | 0 | 0 | 0.00000 |
| HETATM | 205 | Pt | 6.85316  | 9.27366  | 21.79184 | Pt | 0 | 0 | 0.00000 |
| HETATM | 206 | Pt | 6.85426  | 12.06499 | 21.79243 | Pt | 0 | 0 | 0.00000 |
| HETATM | 207 | Pt | 6.85427  | 14.85602 | 21.79244 | Pt | 0 | 0 | 0.00000 |
| HETATM | 208 | Pt | 6.85320  | 17.64736 | 21.79186 | Pt | 0 | 0 | 0.00000 |
| HETATM | 209 | Pt | 11.68885 | 23.22912 | 21.79028 | Pt | 0 | 0 | 0.00000 |
| HETATM | 210 | Pt | 11.68884 | 26.02160 | 21.79027 | Pt | 0 | 0 | 0.00000 |
| HETATM | 211 | Pt | 11.68795 | 28.81277 | 21.79145 | Pt | 0 | 0 | 0.00000 |
| HETATM | 212 | Pt | 11.68685 | 9.27280  | 21.79030 | Pt | 0 | 0 | 0.00000 |
| HETATM | 213 | Pt | 11.68772 | 12.06389 | 21.78546 | Pt | 0 | 0 | 0.00000 |
| HETATM | 214 | Pt | 11.68773 | 14.85713 | 21.78547 | Pt | 0 | 0 | 0.00000 |
| HETATM | 215 | Pt | 11.68688 | 17.64823 | 21.79033 | Pt | 0 | 0 | 0.00000 |
| HETATM | 216 | Pt | 11.68798 | 20.43795 | 21.79147 | Pt | 0 | 0 | 0.00000 |
| HETATM | 217 | Pt | 16.52294 | 26.02118 | 21.78777 | Pt | 0 | 0 | 0.00000 |
| HETATM | 218 | Pt | 16.52175 | 28.81229 | 21.78943 | Pt | 0 | 0 | 0.00000 |
| HETATM | 219 | Pt | 16.52118 | 31.60338 | 21.79014 | Pt | 0 | 0 | 0.00000 |
| HETATM | 220 | Pt | 16.52363 | 12.06493 | 21.78598 | Pt | 0 | 0 | 0.00000 |
| HETATM | 221 | Pt | 16.52362 | 14.85610 | 21.78599 | Pt | 0 | 0 | 0.00000 |
| HETATM | 222 | Pt | 16.52117 | 17.64733 | 21.79016 | Pt | 0 | 0 | 0.00000 |
| HETATM | 223 | Pt | 16.52175 | 20.43842 | 21.78945 | Pt | 0 | 0 | 0.00000 |
| HETATM | 224 | Pt | 16.52294 | 23.22953 | 21.78777 | Pt | 0 | 0 | 0.00000 |
| HETATM | 225 | Pt | 4.43452  | 19.04274 | 21.78649 | Pt | 0 | 0 | 0.00000 |
| HETATM | 226 | Pt | 4.43525  | 21.83405 | 21.78579 | Pt | 0 | 0 | 0.00000 |
| HETATM | 227 | Pt | 4.43615  | 24.62536 | 21.78473 | Pt | 0 | 0 | 0.00000 |
| HETATM | 228 | Pt | 4.43522  | 5.08699  | 21.78582 | Pt | 0 | 0 | 0.00000 |
| HETATM | 229 | Pt | 4.43449  | 7.87830  | 21.78653 | Pt | 0 | 0 | 0.00000 |
| HETATM | 230 | Pt | 4.43529  | 10.66958 | 21.78600 | Pt | 0 | 0 | 0.00000 |
| HETATM | 231 | Pt | 4.43568  | 13.46052 | 21.78597 | Pt | 0 | 0 | 0.00000 |
| HETATM | 232 | Pt | 4.43530  | 16.25146 | 21.78597 | Pt | 0 | 0 | 0.00000 |
| HETATM | 233 | Pt | 9.26981  | 21.83389 | 21.78578 | Pt | 0 | 0 | 0.00000 |
| HETATM | 234 | Pt | 9.27043  | 24.62535 | 21.78543 | Pt | 0 | 0 | 0.00000 |
| HETATM | 235 | Pt | 9.26978  | 27.41681 | 21.78580 | Pt | 0 | 0 | 0.00000 |
| HETATM | 236 | Pt | 9.26864  | 7.87753  | 21.78607 | Pt | 0 | 0 | 0.00000 |
| HETATM | 237 | Pt | 9.26849  | 10.66787 | 21.78445 | Pt | 0 | 0 | 0.00000 |
| HETATM | 238 | Pt | 9.26931  | 13.46053 | 21.78359 | Pt | 0 | 0 | 0.00000 |
| HETATM | 239 | Pt | 9.26852  | 16.25317 | 21.78444 | Pt | 0 | 0 | 0.00000 |
| HETATM | 240 | Pt | 9.26868  | 19.04350 | 21.78606 | Pt | 0 | 0 | 0.00000 |
| HETATM | 241 | Pt | 14.10438 | 24.62535 | 21.78302 | Pt | 0 | 0 | 0.00000 |
| HETATM | 242 | Pt | 14.10413 | 27.41744 | 21.78471 | Pt | 0 | 0 | 0.00000 |
| HETATM | 243 | Pt | 14.10327 | 30.20823 | 21.78708 | Pt | 0 | 0 | 0.00000 |
| HETATM | 244 | Pt | 14.10372 | 10.66862 | 21.78398 | Pt | 0 | 0 | 0.00000 |
| HETATM | 245 | Pt | 14.10545 | 13.46053 | 21.77933 | Pt | 0 | 0 | 0.00000 |
| HETATM | 246 | Pt | 14.10373 | 16.25244 | 21.78399 | Pt | 0 | 0 | 0.00000 |
| HETATM | 247 | Pt | 14.10329 | 19.04249 | 21.78710 | Pt | 0 | 0 | 0.00000 |
| HETATM | 248 | Pt | 14.10415 | 21.83326 | 21.78472 | Pt | 0 | 0 | 0.00000 |
| HETATM | 249 | Pt | 18.93886 | 27.41692 | 21.78449 | Pt | 0 | 0 | 0.00000 |
| HETATM | 250 | Pt | 18.93781 | 30.20785 | 21.78573 | Pt | 0 | 0 | 0.00000 |
| HETATM | 251 | Pt | 18.93871 | 32.99861 | 21.78438 | Pt | 0 | 0 | 0.00000 |
| HETATM | 252 | Pt | 18.94031 | 13.46053 | 21.78274 | Pt | 0 | 0 | 0.00000 |
| HETATM | 253 | Pt | 18.93870 | 16.25211 | 21.78441 | Pt | 0 | 0 | 0.00000 |
| HETATM | 254 | Pt | 18.93780 | 19.04287 | 21.78577 | Pt | 0 | 0 | 0.00000 |
| HETATM | 255 | Pt | 18.93885 | 21.83378 | 21.78452 | Pt | 0 | 0 | 0.00000 |
| HETATM | 256 | Pt | 18.93915 | 24.62535 | 21.78348 | Pt | 0 | 0 | 0.00000 |
| HETATM | 257 | Pt | 2.82699  | 19.04293 | 24.07297 | Pt | 0 | 0 | 0.00000 |
| HETATM | 258 | Pt | 2.82824  | 21.83382 | 24.07160 | Pt | 0 | 0 | 0.00000 |
| HETATM | 259 | Pt | 2.82986  | 2.29567  | 24.06855 | Pt | 0 | 0 | 0.00000 |
| HETATM | 260 | Pt | 2.82821  | 5.08720  | 24.07160 | Pt | 0 | 0 | 0.00000 |

|        |     |    |          |          |          |    |   |   |         |
|--------|-----|----|----------|----------|----------|----|---|---|---------|
| HETATM | 261 | Pt | 2.82696  | 7.87811  | 24.07296 | Pt | 0 | 0 | 0.00000 |
| HETATM | 262 | Pt | 2.82833  | 10.66958 | 24.07044 | Pt | 0 | 0 | 0.00000 |
| HETATM | 263 | Pt | 2.82884  | 13.46053 | 24.07040 | Pt | 0 | 0 | 0.00000 |
| HETATM | 264 | Pt | 2.82835  | 16.25146 | 24.07046 | Pt | 0 | 0 | 0.00000 |
| HETATM | 265 | Pt | 7.66441  | 21.83310 | 24.07270 | Pt | 0 | 0 | 0.00000 |
| HETATM | 266 | Pt | 7.66474  | 24.62537 | 24.07209 | Pt | 0 | 0 | 0.00000 |
| HETATM | 267 | Pt | 7.66439  | 5.08795  | 24.07268 | Pt | 0 | 0 | 0.00000 |
| HETATM | 268 | Pt | 7.66276  | 7.87814  | 24.07377 | Pt | 0 | 0 | 0.00000 |
| HETATM | 269 | Pt | 7.66377  | 10.66922 | 24.07522 | Pt | 0 | 0 | 0.00000 |
| HETATM | 270 | Pt | 7.66652  | 13.46051 | 24.07588 | Pt | 0 | 0 | 0.00000 |
| HETATM | 271 | Pt | 7.66378  | 16.25186 | 24.07524 | Pt | 0 | 0 | 0.00000 |
| HETATM | 272 | Pt | 7.66278  | 19.04290 | 24.07380 | Pt | 0 | 0 | 0.00000 |
| HETATM | 273 | Pt | 12.49891 | 24.62538 | 24.06928 | Pt | 0 | 0 | 0.00000 |
| HETATM | 274 | Pt | 12.49993 | 27.41962 | 24.07222 | Pt | 0 | 0 | 0.00000 |
| HETATM | 275 | Pt | 12.49763 | 7.88000  | 24.07590 | Pt | 0 | 0 | 0.00000 |
| HETATM | 276 | Pt | 12.49641 | 10.66806 | 24.06804 | Pt | 0 | 0 | 0.00000 |
| HETATM | 277 | Pt | 12.50018 | 13.46049 | 24.05782 | Pt | 0 | 0 | 0.00000 |
| HETATM | 278 | Pt | 12.49641 | 16.25294 | 24.06807 | Pt | 0 | 0 | 0.00000 |
| HETATM | 279 | Pt | 12.49763 | 19.04115 | 24.07593 | Pt | 0 | 0 | 0.00000 |
| HETATM | 280 | Pt | 12.49993 | 21.83113 | 24.07224 | Pt | 0 | 0 | 0.00000 |
| HETATM | 281 | Pt | 17.33264 | 27.41736 | 24.06850 | Pt | 0 | 0 | 0.00000 |
| HETATM | 282 | Pt | 17.32910 | 30.20755 | 24.07084 | Pt | 0 | 0 | 0.00000 |
| HETATM | 283 | Pt | 17.33028 | 10.66985 | 24.06813 | Pt | 0 | 0 | 0.00000 |
| HETATM | 284 | Pt | 17.33469 | 13.46049 | 24.06526 | Pt | 0 | 0 | 0.00000 |
| HETATM | 285 | Pt | 17.33027 | 16.25106 | 24.06815 | Pt | 0 | 0 | 0.00000 |
| HETATM | 286 | Pt | 17.32907 | 19.04315 | 24.07086 | Pt | 0 | 0 | 0.00000 |
| HETATM | 287 | Pt | 17.33262 | 21.83339 | 24.06850 | Pt | 0 | 0 | 0.00000 |
| HETATM | 288 | Pt | 17.33235 | 24.62539 | 24.06681 | Pt | 0 | 0 | 0.00000 |
| HETATM | 289 | Pt | 5.23413  | 20.43820 | 24.06335 | Pt | 0 | 0 | 0.00000 |
| HETATM | 290 | Pt | 5.23628  | 23.22978 | 24.06198 | Pt | 0 | 0 | 0.00000 |
| HETATM | 291 | Pt | 5.23627  | 3.69120  | 24.06200 | Pt | 0 | 0 | 0.00000 |
| HETATM | 292 | Pt | 5.23412  | 6.48282  | 24.06339 | Pt | 0 | 0 | 0.00000 |
| HETATM | 293 | Pt | 5.23472  | 9.27418  | 24.06349 | Pt | 0 | 0 | 0.00000 |
| HETATM | 294 | Pt | 5.23602  | 12.06521 | 24.06384 | Pt | 0 | 0 | 0.00000 |
| HETATM | 295 | Pt | 5.23602  | 14.85588 | 24.06383 | Pt | 0 | 0 | 0.00000 |
| HETATM | 296 | Pt | 5.23473  | 17.64687 | 24.06345 | Pt | 0 | 0 | 0.00000 |
| HETATM | 297 | Pt | 10.07094 | 23.22901 | 24.06142 | Pt | 0 | 0 | 0.00000 |
| HETATM | 298 | Pt | 10.07094 | 26.02167 | 24.06142 | Pt | 0 | 0 | 0.00000 |
| HETATM | 299 | Pt | 10.07003 | 6.48372  | 24.06362 | Pt | 0 | 0 | 0.00000 |
| HETATM | 300 | Pt | 10.06810 | 9.27258  | 24.06331 | Pt | 0 | 0 | 0.00000 |
| HETATM | 301 | Pt | 10.06901 | 12.06237 | 24.05571 | Pt | 0 | 0 | 0.00000 |
| HETATM | 302 | Pt | 10.06901 | 14.85869 | 24.05571 | Pt | 0 | 0 | 0.00000 |
| HETATM | 303 | Pt | 10.06810 | 17.64848 | 24.06332 | Pt | 0 | 0 | 0.00000 |
| HETATM | 304 | Pt | 10.07003 | 20.43732 | 24.06362 | Pt | 0 | 0 | 0.00000 |
| HETATM | 305 | Pt | 14.90440 | 26.02149 | 24.05767 | Pt | 0 | 0 | 0.00000 |
| HETATM | 306 | Pt | 14.90399 | 28.81404 | 24.06401 | Pt | 0 | 0 | 0.00000 |
| HETATM | 307 | Pt | 14.90245 | 9.27414  | 24.06686 | Pt | 0 | 0 | 0.00000 |
| HETATM | 308 | Pt | 14.90677 | 12.06429 | 24.05541 | Pt | 0 | 0 | 0.00000 |
| HETATM | 309 | Pt | 14.90676 | 14.85675 | 24.05543 | Pt | 0 | 0 | 0.00000 |
| HETATM | 310 | Pt | 14.90244 | 17.64690 | 24.06690 | Pt | 0 | 0 | 0.00000 |
| HETATM | 311 | Pt | 14.90399 | 20.43668 | 24.06405 | Pt | 0 | 0 | 0.00000 |
| HETATM | 312 | Pt | 14.90439 | 23.22922 | 24.05769 | Pt | 0 | 0 | 0.00000 |
| HETATM | 313 | Pt | 0.39987  | 17.64823 | 24.06310 | Pt | 0 | 0 | 0.00000 |
| HETATM | 314 | Pt | 0.39977  | 20.43841 | 24.06303 | Pt | 0 | 0 | 0.00000 |
| HETATM | 315 | Pt | 0.40200  | 0.89910  | 24.05950 | Pt | 0 | 0 | 0.00000 |
| HETATM | 316 | Pt | 0.40199  | 3.69223  | 24.05952 | Pt | 0 | 0 | 0.00000 |
| HETATM | 317 | Pt | 0.39975  | 6.48262  | 24.06306 | Pt | 0 | 0 | 0.00000 |
| HETATM | 318 | Pt | 0.39986  | 9.27282  | 24.06316 | Pt | 0 | 0 | 0.00000 |
| HETATM | 319 | Pt | 0.40080  | 12.06500 | 24.06015 | Pt | 0 | 0 | 0.00000 |
| HETATM | 320 | Pt | 0.40080  | 14.85606 | 24.06013 | Pt | 0 | 0 | 0.00000 |
| HETATM | 321 | Pt | 3.61143  | 20.43838 | 26.38533 | Pt | 0 | 0 | 0.00000 |
| HETATM | 322 | Pt | 3.61427  | 23.22922 | 26.38010 | Pt | 0 | 0 | 0.00000 |
| HETATM | 323 | Pt | 3.61427  | 3.69177  | 26.38008 | Pt | 0 | 0 | 0.00000 |

|        |     |    |          |          |          |    |   |   |         |
|--------|-----|----|----------|----------|----------|----|---|---|---------|
| HETATM | 324 | Pt | 3.61142  | 6.48265  | 26.38529 | Pt | 0 | 0 | 0.00000 |
| HETATM | 325 | Pt | 3.61242  | 9.27362  | 26.38201 | Pt | 0 | 0 | 0.00000 |
| HETATM | 326 | Pt | 3.61346  | 12.06496 | 26.38237 | Pt | 0 | 0 | 0.00000 |
| HETATM | 327 | Pt | 3.61346  | 14.85610 | 26.38239 | Pt | 0 | 0 | 0.00000 |
| HETATM | 328 | Pt | 3.61242  | 17.64743 | 26.38205 | Pt | 0 | 0 | 0.00000 |
| HETATM | 329 | Pt | 8.45005  | 23.22831 | 26.38404 | Pt | 0 | 0 | 0.00000 |
| HETATM | 330 | Pt | 8.45005  | 26.02238 | 26.38403 | Pt | 0 | 0 | 0.00000 |
| HETATM | 331 | Pt | 8.45318  | 6.48611  | 26.38850 | Pt | 0 | 0 | 0.00000 |
| HETATM | 332 | Pt | 8.44786  | 9.27179  | 26.39008 | Pt | 0 | 0 | 0.00000 |
| HETATM | 333 | Pt | 8.45607  | 12.06374 | 26.39353 | Pt | 0 | 0 | 0.00000 |
| HETATM | 334 | Pt | 8.45607  | 14.85733 | 26.39355 | Pt | 0 | 0 | 0.00000 |
| HETATM | 335 | Pt | 8.44785  | 17.64925 | 26.39012 | Pt | 0 | 0 | 0.00000 |
| HETATM | 336 | Pt | 8.45318  | 20.43500 | 26.38854 | Pt | 0 | 0 | 0.00000 |
| HETATM | 337 | Pt | 13.28339 | 26.02356 | 26.37925 | Pt | 0 | 0 | 0.00000 |
| HETATM | 338 | Pt | 13.28930 | 28.82495 | 26.39332 | Pt | 0 | 0 | 0.00000 |
| HETATM | 339 | Pt | 13.27910 | 9.28286  | 26.39815 | Pt | 0 | 0 | 0.00000 |
| HETATM | 340 | Pt | 13.28904 | 12.06234 | 26.36531 | Pt | 0 | 0 | 0.00000 |
| HETATM | 341 | Pt | 13.28904 | 14.85872 | 26.36532 | Pt | 0 | 0 | 0.00000 |
| HETATM | 342 | Pt | 13.27909 | 17.63820 | 26.39816 | Pt | 0 | 0 | 0.00000 |
| HETATM | 343 | Pt | 13.28929 | 20.42576 | 26.39335 | Pt | 0 | 0 | 0.00000 |
| HETATM | 344 | Pt | 13.28338 | 23.22713 | 26.37925 | Pt | 0 | 0 | 0.00000 |
| HETATM | 345 | Pt | 18.11640 | 28.81705 | 26.38282 | Pt | 0 | 0 | 0.00000 |
| HETATM | 346 | Pt | 18.10979 | 31.60499 | 26.37733 | Pt | 0 | 0 | 0.00000 |
| HETATM | 347 | Pt | 18.12010 | 12.06301 | 26.37507 | Pt | 0 | 0 | 0.00000 |
| HETATM | 348 | Pt | 18.12010 | 14.85803 | 26.37508 | Pt | 0 | 0 | 0.00000 |
| HETATM | 349 | Pt | 18.10978 | 17.64573 | 26.37733 | Pt | 0 | 0 | 0.00000 |
| HETATM | 350 | Pt | 18.11639 | 20.43366 | 26.38280 | Pt | 0 | 0 | 0.00000 |
| HETATM | 351 | Pt | 18.11589 | 23.22912 | 26.37742 | Pt | 0 | 0 | 0.00000 |
| HETATM | 352 | Pt | 18.11589 | 26.02158 | 26.37743 | Pt | 0 | 0 | 0.00000 |
| HETATM | 353 | Pt | 6.05563  | 21.83402 | 26.31172 | Pt | 0 | 0 | 0.00000 |
| HETATM | 354 | Pt | 6.05653  | 24.62531 | 26.31384 | Pt | 0 | 0 | 0.00000 |
| HETATM | 355 | Pt | 6.05564  | 5.08695  | 26.31172 | Pt | 0 | 0 | 0.00000 |
| HETATM | 356 | Pt | 6.05379  | 7.87847  | 26.31378 | Pt | 0 | 0 | 0.00000 |
| HETATM | 357 | Pt | 6.05580  | 10.66908 | 26.31546 | Pt | 0 | 0 | 0.00000 |
| HETATM | 358 | Pt | 6.05900  | 13.46056 | 26.31423 | Pt | 0 | 0 | 0.00000 |
| HETATM | 359 | Pt | 6.05579  | 16.25202 | 26.31547 | Pt | 0 | 0 | 0.00000 |
| HETATM | 360 | Pt | 6.05376  | 19.04256 | 26.31378 | Pt | 0 | 0 | 0.00000 |
| HETATM | 361 | Pt | 10.89027 | 24.62532 | 26.30900 | Pt | 0 | 0 | 0.00000 |
| HETATM | 362 | Pt | 10.89313 | 27.41743 | 26.30917 | Pt | 0 | 0 | 0.00000 |
| HETATM | 363 | Pt | 10.89050 | 7.88247  | 26.32043 | Pt | 0 | 0 | 0.00000 |
| HETATM | 364 | Pt | 10.88641 | 10.66619 | 26.30966 | Pt | 0 | 0 | 0.00000 |
| HETATM | 365 | Pt | 10.88908 | 13.46055 | 26.28866 | Pt | 0 | 0 | 0.00000 |
| HETATM | 366 | Pt | 10.88640 | 16.25488 | 26.30968 | Pt | 0 | 0 | 0.00000 |
| HETATM | 367 | Pt | 10.89047 | 19.03859 | 26.32045 | Pt | 0 | 0 | 0.00000 |
| HETATM | 368 | Pt | 10.89310 | 21.83325 | 26.30918 | Pt | 0 | 0 | 0.00000 |
| HETATM | 369 | Pt | 15.72414 | 27.41488 | 26.30621 | Pt | 0 | 0 | 0.00000 |
| HETATM | 370 | Pt | 15.72235 | 30.21000 | 26.32579 | Pt | 0 | 0 | 0.00000 |
| HETATM | 371 | Pt | 15.72096 | 10.66757 | 26.32035 | Pt | 0 | 0 | 0.00000 |
| HETATM | 372 | Pt | 15.72148 | 13.46053 | 26.30778 | Pt | 0 | 0 | 0.00000 |
| HETATM | 373 | Pt | 15.72094 | 16.25348 | 26.32038 | Pt | 0 | 0 | 0.00000 |
| HETATM | 374 | Pt | 15.72232 | 19.04071 | 26.32582 | Pt | 0 | 0 | 0.00000 |
| HETATM | 375 | Pt | 15.72412 | 21.83583 | 26.30622 | Pt | 0 | 0 | 0.00000 |
| HETATM | 376 | Pt | 15.72159 | 24.62535 | 26.30449 | Pt | 0 | 0 | 0.00000 |
| HETATM | 377 | Pt | 1.21693  | 19.04333 | 26.31835 | Pt | 0 | 0 | 0.00000 |
| HETATM | 378 | Pt | 1.21873  | 21.83384 | 26.31534 | Pt | 0 | 0 | 0.00000 |
| HETATM | 379 | Pt | 1.22034  | 2.29565  | 26.30740 | Pt | 0 | 0 | 0.00000 |
| HETATM | 380 | Pt | 1.21873  | 5.08715  | 26.31536 | Pt | 0 | 0 | 0.00000 |
| HETATM | 381 | Pt | 1.21693  | 7.87770  | 26.31838 | Pt | 0 | 0 | 0.00000 |
| HETATM | 382 | Pt | 1.21868  | 10.67041 | 26.31110 | Pt | 0 | 0 | 0.00000 |
| HETATM | 383 | Pt | 1.21937  | 13.46055 | 26.31148 | Pt | 0 | 0 | 0.00000 |
| HETATM | 384 | Pt | 1.21868  | 16.25066 | 26.31109 | Pt | 0 | 0 | 0.00000 |
| HETATM | 385 | Pt | 2.04477  | 17.65094 | 28.92835 | Pt | 0 | 0 | 0.00000 |
| HETATM | 386 | Pt | 2.05753  | 20.43903 | 28.96085 | Pt | 0 | 0 | 0.00000 |

|        |     |    |          |          |          |    |   |   |         |
|--------|-----|----|----------|----------|----------|----|---|---|---------|
| HETATM | 387 | Pt | 2.04752  | 23.22828 | 28.92509 | Pt | 0 | 0 | 0.00000 |
| HETATM | 388 | Pt | 2.04751  | 3.69276  | 28.92509 | Pt | 0 | 0 | 0.00000 |
| HETATM | 389 | Pt | 2.05752  | 6.48202  | 28.96087 | Pt | 0 | 0 | 0.00000 |
| HETATM | 390 | Pt | 2.04476  | 9.26999  | 28.92834 | Pt | 0 | 0 | 0.00000 |
| HETATM | 391 | Pt | 2.05027  | 12.06233 | 28.94432 | Pt | 0 | 0 | 0.00000 |
| HETATM | 392 | Pt | 2.05027  | 14.85869 | 28.94433 | Pt | 0 | 0 | 0.00000 |
| HETATM | 393 | Pt | 6.90947  | 20.43396 | 28.92599 | Pt | 0 | 0 | 0.00000 |
| HETATM | 394 | Pt | 6.89541  | 23.22674 | 28.94772 | Pt | 0 | 0 | 0.00000 |
| HETATM | 395 | Pt | 6.89541  | 26.02390 | 28.94772 | Pt | 0 | 0 | 0.00000 |
| HETATM | 396 | Pt | 6.90946  | 6.48700  | 28.92594 | Pt | 0 | 0 | 0.00000 |
| HETATM | 397 | Pt | 6.89872  | 9.27305  | 28.95968 | Pt | 0 | 0 | 0.00000 |
| HETATM | 398 | Pt | 6.89784  | 12.06053 | 28.94052 | Pt | 0 | 0 | 0.00000 |
| HETATM | 399 | Pt | 6.89785  | 14.86050 | 28.94052 | Pt | 0 | 0 | 0.00000 |
| HETATM | 400 | Pt | 6.89873  | 17.64798 | 28.95970 | Pt | 0 | 0 | 0.00000 |
| HETATM | 401 | Pt | 11.72265 | 23.20756 | 28.93539 | Pt | 0 | 0 | 0.00000 |
| HETATM | 402 | Pt | 11.72264 | 26.04316 | 28.93539 | Pt | 0 | 0 | 0.00000 |
| HETATM | 403 | Pt | 11.74876 | 28.85525 | 28.91656 | Pt | 0 | 0 | 0.00000 |
| HETATM | 404 | Pt | 11.72845 | 9.30478  | 29.31450 | Pt | 0 | 0 | 0.00000 |
| HETATM | 405 | Pt | 11.71576 | 12.07424 | 28.83446 | Pt | 0 | 0 | 0.00000 |
| HETATM | 406 | Pt | 11.71576 | 14.84679 | 28.83448 | Pt | 0 | 0 | 0.00000 |
| HETATM | 407 | Pt | 11.72847 | 17.61627 | 29.31454 | Pt | 0 | 0 | 0.00000 |
| HETATM | 408 | Pt | 11.74877 | 20.39546 | 28.91659 | Pt | 0 | 0 | 0.00000 |
| HETATM | 409 | Pt | 16.54885 | 26.04036 | 28.92852 | Pt | 0 | 0 | 0.00000 |
| HETATM | 410 | Pt | 16.54297 | 28.84715 | 28.91543 | Pt | 0 | 0 | 0.00000 |
| HETATM | 411 | Pt | 16.55458 | 31.62588 | 29.29503 | Pt | 0 | 0 | 0.00000 |
| HETATM | 412 | Pt | 16.55135 | 12.07031 | 28.87876 | Pt | 0 | 0 | 0.00000 |
| HETATM | 413 | Pt | 16.55136 | 14.85073 | 28.87877 | Pt | 0 | 0 | 0.00000 |
| HETATM | 414 | Pt | 16.55459 | 17.62486 | 29.29506 | Pt | 0 | 0 | 0.00000 |
| HETATM | 415 | Pt | 16.54297 | 20.40356 | 28.91544 | Pt | 0 | 0 | 0.00000 |
| HETATM | 416 | Pt | 16.54885 | 23.21035 | 28.92853 | Pt | 0 | 0 | 0.00000 |
| HETATM | 417 | Pt | 4.43088  | 19.04310 | 28.65382 | Pt | 0 | 0 | 0.00000 |
| HETATM | 418 | Pt | 4.43151  | 21.83362 | 28.65303 | Pt | 0 | 0 | 0.00000 |
| HETATM | 419 | Pt | 4.42760  | 24.62536 | 28.64886 | Pt | 0 | 0 | 0.00000 |
| HETATM | 420 | Pt | 4.43149  | 5.08742  | 28.65301 | Pt | 0 | 0 | 0.00000 |
| HETATM | 421 | Pt | 4.43088  | 7.87795  | 28.65378 | Pt | 0 | 0 | 0.00000 |
| HETATM | 422 | Pt | 4.42849  | 10.66808 | 28.65212 | Pt | 0 | 0 | 0.00000 |
| HETATM | 423 | Pt | 4.42741  | 13.46051 | 28.65140 | Pt | 0 | 0 | 0.00000 |
| HETATM | 424 | Pt | 4.42850  | 16.25292 | 28.65215 | Pt | 0 | 0 | 0.00000 |
| HETATM | 425 | Pt | 9.27663  | 21.83350 | 28.65126 | Pt | 0 | 0 | 0.00000 |
| HETATM | 426 | Pt | 9.26784  | 24.62537 | 28.65272 | Pt | 0 | 0 | 0.00000 |
| HETATM | 427 | Pt | 9.27661  | 27.41720 | 28.65123 | Pt | 0 | 0 | 0.00000 |
| HETATM | 428 | Pt | 9.29167  | 7.89146  | 28.67020 | Pt | 0 | 0 | 0.00000 |
| HETATM | 429 | Pt | 9.29274  | 10.65394 | 28.66109 | Pt | 0 | 0 | 0.00000 |
| HETATM | 430 | Pt | 9.25180  | 13.46051 | 28.68591 | Pt | 0 | 0 | 0.00000 |
| HETATM | 431 | Pt | 9.29276  | 16.26711 | 28.66112 | Pt | 0 | 0 | 0.00000 |
| HETATM | 432 | Pt | 9.29169  | 19.02957 | 28.67025 | Pt | 0 | 0 | 0.00000 |
| HETATM | 433 | Pt | 14.08814 | 24.62536 | 28.65043 | Pt | 0 | 0 | 0.00000 |
| HETATM | 434 | Pt | 14.09955 | 27.42143 | 28.64552 | Pt | 0 | 0 | 0.00000 |
| HETATM | 435 | Pt | 14.10667 | 30.27455 | 28.68717 | Pt | 0 | 0 | 0.00000 |
| HETATM | 436 | Pt | 14.09520 | 10.67447 | 28.70307 | Pt | 0 | 0 | 0.00000 |
| HETATM | 437 | Pt | 14.13161 | 13.46051 | 28.59220 | Pt | 0 | 0 | 0.00000 |
| HETATM | 438 | Pt | 14.09521 | 16.24660 | 28.70308 | Pt | 0 | 0 | 0.00000 |
| HETATM | 439 | Pt | 14.10668 | 18.97616 | 28.68719 | Pt | 0 | 0 | 0.00000 |
| HETATM | 440 | Pt | 14.09956 | 21.82928 | 28.64554 | Pt | 0 | 0 | 0.00000 |
| HETATM | 441 | Pt | 18.92145 | 27.42323 | 28.64557 | Pt | 0 | 0 | 0.00000 |
| HETATM | 442 | Pt | 18.91273 | 30.23994 | 28.66406 | Pt | 0 | 0 | 0.00000 |
| HETATM | 443 | Pt | 18.91591 | 32.97806 | 28.65860 | Pt | 0 | 0 | 0.00000 |
| HETATM | 444 | Pt | 18.92920 | 13.46051 | 28.64038 | Pt | 0 | 0 | 0.00000 |
| HETATM | 445 | Pt | 18.91591 | 16.27271 | 28.65859 | Pt | 0 | 0 | 0.00000 |
| HETATM | 446 | Pt | 18.91273 | 19.01079 | 28.66405 | Pt | 0 | 0 | 0.00000 |
| HETATM | 447 | Pt | 18.92145 | 21.82749 | 28.64557 | Pt | 0 | 0 | 0.00000 |
| HETATM | 448 | Pt | 18.91943 | 24.62535 | 28.64938 | Pt | 0 | 0 | 0.00000 |
| HETATM | 449 | O  | 3.02847  | 19.03488 | 29.95339 | O  | 0 | 0 | 0.00000 |

|        |     |   |          |          |          |   |   |   |         |
|--------|-----|---|----------|----------|----------|---|---|---|---------|
| HETATM | 450 | O | 3.03044  | 21.84486 | 29.95234 | O | 0 | 0 | 0.00000 |
| HETATM | 451 | O | 3.01881  | 2.29567  | 29.93881 | O | 0 | 0 | 0.00000 |
| HETATM | 452 | O | 3.03045  | 5.07609  | 29.95234 | O | 0 | 0 | 0.00000 |
| HETATM | 453 | O | 3.02847  | 7.88624  | 29.95337 | O | 0 | 0 | 0.00000 |
| HETATM | 454 | O | 3.02239  | 10.66272 | 29.94685 | O | 0 | 0 | 0.00000 |
| HETATM | 455 | O | 3.03147  | 13.46052 | 29.95168 | O | 0 | 0 | 0.00000 |
| HETATM | 456 | O | 3.02237  | 16.25833 | 29.94686 | O | 0 | 0 | 0.00000 |
| HETATM | 457 | O | 7.87657  | 21.82733 | 29.94793 | O | 0 | 0 | 0.00000 |
| HETATM | 458 | O | 7.87498  | 24.62534 | 29.95373 | O | 0 | 0 | 0.00000 |
| HETATM | 459 | O | 7.87657  | 5.09380  | 29.94790 | O | 0 | 0 | 0.00000 |
| HETATM | 460 | O | 7.87435  | 7.86291  | 29.95734 | O | 0 | 0 | 0.00000 |
| HETATM | 461 | O | 7.87818  | 10.67217 | 29.95697 | O | 0 | 0 | 0.00000 |
| HETATM | 462 | O | 7.83955  | 13.46054 | 29.97070 | O | 0 | 0 | 0.00000 |
| HETATM | 463 | O | 7.87819  | 16.24888 | 29.95700 | O | 0 | 0 | 0.00000 |
| HETATM | 464 | O | 7.87436  | 19.05810 | 29.95737 | O | 0 | 0 | 0.00000 |
| HETATM | 465 | O | 12.70225 | 24.62533 | 29.94433 | O | 0 | 0 | 0.00000 |
| HETATM | 466 | O | 12.69452 | 27.43329 | 29.93659 | O | 0 | 0 | 0.00000 |
| HETATM | 467 | O | 12.77178 | 7.79092  | 30.03611 | O | 0 | 0 | 0.00000 |
| HETATM | 468 | O | 12.75982 | 10.83064 | 30.02896 | O | 0 | 0 | 0.00000 |
| HETATM | 469 | O | 12.05568 | 13.46054 | 30.00095 | O | 0 | 0 | 0.00000 |
| HETATM | 470 | O | 12.75983 | 16.09042 | 30.02898 | O | 0 | 0 | 0.00000 |
| HETATM | 471 | O | 12.77179 | 19.13013 | 30.03614 | O | 0 | 0 | 0.00000 |
| HETATM | 472 | O | 12.69452 | 21.81740 | 29.93661 | O | 0 | 0 | 0.00000 |
| HETATM | 473 | O | 17.50751 | 27.42656 | 29.93393 | O | 0 | 0 | 0.00000 |
| HETATM | 474 | O | 17.58475 | 30.11063 | 30.02643 | O | 0 | 0 | 0.00000 |
| HETATM | 475 | O | 17.59248 | 10.79467 | 30.01603 | O | 0 | 0 | 0.00000 |
| HETATM | 476 | O | 17.47556 | 13.46052 | 29.90943 | O | 0 | 0 | 0.00000 |
| HETATM | 477 | O | 17.59249 | 16.12639 | 30.01603 | O | 0 | 0 | 0.00000 |
| HETATM | 478 | O | 17.58477 | 19.14010 | 30.02644 | O | 0 | 0 | 0.00000 |
| HETATM | 479 | O | 17.50752 | 21.82414 | 29.93395 | O | 0 | 0 | 0.00000 |
| HETATM | 480 | O | 17.52936 | 24.62534 | 29.94132 | O | 0 | 0 | 0.00000 |

UNIT ENERGY   kcal  
 ENERGY       -60130.384384  
 END

XTLGRF 200  
 DESCRP FS  
 REMARK Pt111\_0.50ML\_8x8x7\_30.0\_vac hcp-displacement  
 FIXATOMS       1    128  
 CRYSTX       22.32968   22.32968   43.67409   90.00000   90.00000   60.00000  
 FORMAT ATOM   (a6,lx,i5,lx,a5,lx,a3,lx,a1,lx,a5,3f10.5,lx,a5,i3,i2,lx,f8.5)  

|        |    |    |          |          |          |    |   |   |         |
|--------|----|----|----------|----------|----------|----|---|---|---------|
| HETATM | 1  | Pt | 2.02016  | 17.64733 | 14.95089 | Pt | 0 | 0 | 0.00000 |
| HETATM | 2  | Pt | 2.02016  | 20.43854 | 14.95089 | Pt | 0 | 0 | 0.00000 |
| HETATM | 3  | Pt | 2.02016  | 23.22975 | 14.95089 | Pt | 0 | 0 | 0.00000 |
| HETATM | 4  | Pt | 2.02016  | 3.69128  | 14.95089 | Pt | 0 | 0 | 0.00000 |
| HETATM | 5  | Pt | 2.02016  | 6.48249  | 14.95089 | Pt | 0 | 0 | 0.00000 |
| HETATM | 6  | Pt | 2.02016  | 9.27370  | 14.95089 | Pt | 0 | 0 | 0.00000 |
| HETATM | 7  | Pt | 2.02016  | 12.06491 | 14.95089 | Pt | 0 | 0 | 0.00000 |
| HETATM | 8  | Pt | 2.02016  | 14.85612 | 14.95089 | Pt | 0 | 0 | 0.00000 |
| HETATM | 9  | Pt | 6.85468  | 20.43854 | 14.95089 | Pt | 0 | 0 | 0.00000 |
| HETATM | 10 | Pt | 6.85468  | 23.22975 | 14.95089 | Pt | 0 | 0 | 0.00000 |
| HETATM | 11 | Pt | 6.85468  | 26.02096 | 14.95089 | Pt | 0 | 0 | 0.00000 |
| HETATM | 12 | Pt | 6.85468  | 6.48249  | 14.95089 | Pt | 0 | 0 | 0.00000 |
| HETATM | 13 | Pt | 6.85468  | 9.27370  | 14.95089 | Pt | 0 | 0 | 0.00000 |
| HETATM | 14 | Pt | 6.85468  | 12.06491 | 14.95089 | Pt | 0 | 0 | 0.00000 |
| HETATM | 15 | Pt | 6.85468  | 14.85612 | 14.95089 | Pt | 0 | 0 | 0.00000 |
| HETATM | 16 | Pt | 6.85468  | 17.64733 | 14.95089 | Pt | 0 | 0 | 0.00000 |
| HETATM | 17 | Pt | 11.68920 | 23.22975 | 14.95089 | Pt | 0 | 0 | 0.00000 |
| HETATM | 18 | Pt | 11.68920 | 26.02096 | 14.95089 | Pt | 0 | 0 | 0.00000 |
| HETATM | 19 | Pt | 11.68920 | 28.81217 | 14.95089 | Pt | 0 | 0 | 0.00000 |
| HETATM | 20 | Pt | 11.68920 | 9.27370  | 14.95089 | Pt | 0 | 0 | 0.00000 |
| HETATM | 21 | Pt | 11.68920 | 12.06491 | 14.95089 | Pt | 0 | 0 | 0.00000 |
| HETATM | 22 | Pt | 11.68920 | 14.85612 | 14.95089 | Pt | 0 | 0 | 0.00000 |



|        |    |    |          |          |          |    |   |   |         |
|--------|----|----|----------|----------|----------|----|---|---|---------|
| HETATM | 23 | Pt | 11.68920 | 17.64733 | 14.95089 | Pt | 0 | 0 | 0.00000 |
| HETATM | 24 | Pt | 11.68920 | 20.43854 | 14.95089 | Pt | 0 | 0 | 0.00000 |
| HETATM | 25 | Pt | 16.52371 | 26.02096 | 14.95089 | Pt | 0 | 0 | 0.00000 |
| HETATM | 26 | Pt | 16.52371 | 28.81217 | 14.95089 | Pt | 0 | 0 | 0.00000 |
| HETATM | 27 | Pt | 16.52371 | 31.60338 | 14.95089 | Pt | 0 | 0 | 0.00000 |
| HETATM | 28 | Pt | 16.52371 | 12.06491 | 14.95089 | Pt | 0 | 0 | 0.00000 |
| HETATM | 29 | Pt | 16.52371 | 14.85612 | 14.95089 | Pt | 0 | 0 | 0.00000 |
| HETATM | 30 | Pt | 16.52371 | 17.64733 | 14.95089 | Pt | 0 | 0 | 0.00000 |
| HETATM | 31 | Pt | 16.52371 | 20.43854 | 14.95089 | Pt | 0 | 0 | 0.00000 |
| HETATM | 32 | Pt | 16.52371 | 23.22975 | 14.95089 | Pt | 0 | 0 | 0.00000 |
| HETATM | 33 | Pt | 4.43742  | 19.04294 | 14.95089 | Pt | 0 | 0 | 0.00000 |
| HETATM | 34 | Pt | 4.43742  | 21.83415 | 14.95089 | Pt | 0 | 0 | 0.00000 |
| HETATM | 35 | Pt | 4.43742  | 24.62536 | 14.95089 | Pt | 0 | 0 | 0.00000 |
| HETATM | 36 | Pt | 4.43742  | 5.08689  | 14.95089 | Pt | 0 | 0 | 0.00000 |
| HETATM | 37 | Pt | 4.43742  | 7.87810  | 14.95089 | Pt | 0 | 0 | 0.00000 |
| HETATM | 38 | Pt | 4.43742  | 10.66931 | 14.95089 | Pt | 0 | 0 | 0.00000 |
| HETATM | 39 | Pt | 4.43742  | 13.46052 | 14.95089 | Pt | 0 | 0 | 0.00000 |
| HETATM | 40 | Pt | 4.43742  | 16.25173 | 14.95089 | Pt | 0 | 0 | 0.00000 |
| HETATM | 41 | Pt | 9.27194  | 21.83415 | 14.95089 | Pt | 0 | 0 | 0.00000 |
| HETATM | 42 | Pt | 9.27194  | 24.62536 | 14.95089 | Pt | 0 | 0 | 0.00000 |
| HETATM | 43 | Pt | 9.27194  | 27.41657 | 14.95089 | Pt | 0 | 0 | 0.00000 |
| HETATM | 44 | Pt | 9.27194  | 7.87810  | 14.95089 | Pt | 0 | 0 | 0.00000 |
| HETATM | 45 | Pt | 9.27194  | 10.66931 | 14.95089 | Pt | 0 | 0 | 0.00000 |
| HETATM | 46 | Pt | 9.27194  | 13.46052 | 14.95089 | Pt | 0 | 0 | 0.00000 |
| HETATM | 47 | Pt | 9.27194  | 16.25173 | 14.95089 | Pt | 0 | 0 | 0.00000 |
| HETATM | 48 | Pt | 9.27194  | 19.04294 | 14.95089 | Pt | 0 | 0 | 0.00000 |
| HETATM | 49 | Pt | 14.10646 | 24.62536 | 14.95089 | Pt | 0 | 0 | 0.00000 |
| HETATM | 50 | Pt | 14.10646 | 27.41657 | 14.95089 | Pt | 0 | 0 | 0.00000 |
| HETATM | 51 | Pt | 14.10646 | 30.20778 | 14.95089 | Pt | 0 | 0 | 0.00000 |
| HETATM | 52 | Pt | 14.10646 | 10.66931 | 14.95089 | Pt | 0 | 0 | 0.00000 |
| HETATM | 53 | Pt | 14.10646 | 13.46052 | 14.95089 | Pt | 0 | 0 | 0.00000 |
| HETATM | 54 | Pt | 14.10646 | 16.25173 | 14.95089 | Pt | 0 | 0 | 0.00000 |
| HETATM | 55 | Pt | 14.10646 | 19.04294 | 14.95089 | Pt | 0 | 0 | 0.00000 |
| HETATM | 56 | Pt | 14.10646 | 21.83415 | 14.95089 | Pt | 0 | 0 | 0.00000 |
| HETATM | 57 | Pt | 18.94097 | 27.41657 | 14.95089 | Pt | 0 | 0 | 0.00000 |
| HETATM | 58 | Pt | 18.94097 | 30.20778 | 14.95089 | Pt | 0 | 0 | 0.00000 |
| HETATM | 59 | Pt | 18.94097 | 32.99899 | 14.95089 | Pt | 0 | 0 | 0.00000 |
| HETATM | 60 | Pt | 18.94097 | 13.46052 | 14.95089 | Pt | 0 | 0 | 0.00000 |
| HETATM | 61 | Pt | 18.94097 | 16.25173 | 14.95089 | Pt | 0 | 0 | 0.00000 |
| HETATM | 62 | Pt | 18.94097 | 19.04294 | 14.95089 | Pt | 0 | 0 | 0.00000 |
| HETATM | 63 | Pt | 18.94097 | 21.83415 | 14.95089 | Pt | 0 | 0 | 0.00000 |
| HETATM | 64 | Pt | 18.94097 | 24.62536 | 14.95089 | Pt | 0 | 0 | 0.00000 |
| HETATM | 65 | Pt | 2.82591  | 19.04294 | 17.22991 | Pt | 0 | 0 | 0.00000 |
| HETATM | 66 | Pt | 2.82591  | 21.83415 | 17.22991 | Pt | 0 | 0 | 0.00000 |
| HETATM | 67 | Pt | 2.82591  | 2.29568  | 17.22991 | Pt | 0 | 0 | 0.00000 |
| HETATM | 68 | Pt | 2.82591  | 5.08689  | 17.22991 | Pt | 0 | 0 | 0.00000 |
| HETATM | 69 | Pt | 2.82591  | 7.87810  | 17.22991 | Pt | 0 | 0 | 0.00000 |
| HETATM | 70 | Pt | 2.82591  | 10.66931 | 17.22991 | Pt | 0 | 0 | 0.00000 |
| HETATM | 71 | Pt | 2.82591  | 13.46052 | 17.22991 | Pt | 0 | 0 | 0.00000 |
| HETATM | 72 | Pt | 2.82591  | 16.25173 | 17.22991 | Pt | 0 | 0 | 0.00000 |
| HETATM | 73 | Pt | 7.66043  | 21.83415 | 17.22991 | Pt | 0 | 0 | 0.00000 |
| HETATM | 74 | Pt | 7.66043  | 24.62536 | 17.22991 | Pt | 0 | 0 | 0.00000 |
| HETATM | 75 | Pt | 7.66043  | 5.08689  | 17.22991 | Pt | 0 | 0 | 0.00000 |
| HETATM | 76 | Pt | 7.66043  | 7.87810  | 17.22991 | Pt | 0 | 0 | 0.00000 |
| HETATM | 77 | Pt | 7.66043  | 10.66931 | 17.22991 | Pt | 0 | 0 | 0.00000 |
| HETATM | 78 | Pt | 7.66043  | 13.46052 | 17.22991 | Pt | 0 | 0 | 0.00000 |
| HETATM | 79 | Pt | 7.66043  | 16.25173 | 17.22991 | Pt | 0 | 0 | 0.00000 |
| HETATM | 80 | Pt | 7.66043  | 19.04294 | 17.22991 | Pt | 0 | 0 | 0.00000 |
| HETATM | 81 | Pt | 12.49495 | 24.62536 | 17.22991 | Pt | 0 | 0 | 0.00000 |
| HETATM | 82 | Pt | 12.49495 | 27.41657 | 17.22991 | Pt | 0 | 0 | 0.00000 |
| HETATM | 83 | Pt | 12.49495 | 7.87810  | 17.22991 | Pt | 0 | 0 | 0.00000 |
| HETATM | 84 | Pt | 12.49495 | 10.66931 | 17.22991 | Pt | 0 | 0 | 0.00000 |
| HETATM | 85 | Pt | 12.49495 | 13.46052 | 17.22991 | Pt | 0 | 0 | 0.00000 |

|        |     |    |          |          |          |    |   |   |         |
|--------|-----|----|----------|----------|----------|----|---|---|---------|
| HETATM | 86  | Pt | 12.49495 | 16.25173 | 17.22991 | Pt | 0 | 0 | 0.00000 |
| HETATM | 87  | Pt | 12.49495 | 19.04294 | 17.22991 | Pt | 0 | 0 | 0.00000 |
| HETATM | 88  | Pt | 12.49495 | 21.83415 | 17.22991 | Pt | 0 | 0 | 0.00000 |
| HETATM | 89  | Pt | 17.32946 | 27.41657 | 17.22991 | Pt | 0 | 0 | 0.00000 |
| HETATM | 90  | Pt | 17.32946 | 30.20778 | 17.22991 | Pt | 0 | 0 | 0.00000 |
| HETATM | 91  | Pt | 17.32946 | 10.66931 | 17.22991 | Pt | 0 | 0 | 0.00000 |
| HETATM | 92  | Pt | 17.32946 | 13.46052 | 17.22991 | Pt | 0 | 0 | 0.00000 |
| HETATM | 93  | Pt | 17.32946 | 16.25173 | 17.22991 | Pt | 0 | 0 | 0.00000 |
| HETATM | 94  | Pt | 17.32946 | 19.04294 | 17.22991 | Pt | 0 | 0 | 0.00000 |
| HETATM | 95  | Pt | 17.32946 | 21.83415 | 17.22991 | Pt | 0 | 0 | 0.00000 |
| HETATM | 96  | Pt | 17.32946 | 24.62536 | 17.22991 | Pt | 0 | 0 | 0.00000 |
| HETATM | 97  | Pt | 5.24317  | 20.43854 | 17.22991 | Pt | 0 | 0 | 0.00000 |
| HETATM | 98  | Pt | 5.24317  | 23.22975 | 17.22991 | Pt | 0 | 0 | 0.00000 |
| HETATM | 99  | Pt | 5.24317  | 3.69128  | 17.22991 | Pt | 0 | 0 | 0.00000 |
| HETATM | 100 | Pt | 5.24317  | 6.48249  | 17.22991 | Pt | 0 | 0 | 0.00000 |
| HETATM | 101 | Pt | 5.24317  | 9.27370  | 17.22991 | Pt | 0 | 0 | 0.00000 |
| HETATM | 102 | Pt | 5.24317  | 12.06491 | 17.22991 | Pt | 0 | 0 | 0.00000 |
| HETATM | 103 | Pt | 5.24317  | 14.85612 | 17.22991 | Pt | 0 | 0 | 0.00000 |
| HETATM | 104 | Pt | 5.24317  | 17.64733 | 17.22991 | Pt | 0 | 0 | 0.00000 |
| HETATM | 105 | Pt | 10.07769 | 23.22975 | 17.22991 | Pt | 0 | 0 | 0.00000 |
| HETATM | 106 | Pt | 10.07769 | 26.02096 | 17.22991 | Pt | 0 | 0 | 0.00000 |
| HETATM | 107 | Pt | 10.07769 | 6.48249  | 17.22991 | Pt | 0 | 0 | 0.00000 |
| HETATM | 108 | Pt | 10.07769 | 9.27370  | 17.22991 | Pt | 0 | 0 | 0.00000 |
| HETATM | 109 | Pt | 10.07769 | 12.06491 | 17.22991 | Pt | 0 | 0 | 0.00000 |
| HETATM | 110 | Pt | 10.07769 | 14.85612 | 17.22991 | Pt | 0 | 0 | 0.00000 |
| HETATM | 111 | Pt | 10.07769 | 17.64733 | 17.22991 | Pt | 0 | 0 | 0.00000 |
| HETATM | 112 | Pt | 10.07769 | 20.43854 | 17.22991 | Pt | 0 | 0 | 0.00000 |
| HETATM | 113 | Pt | 14.91221 | 26.02096 | 17.22991 | Pt | 0 | 0 | 0.00000 |
| HETATM | 114 | Pt | 14.91221 | 28.81217 | 17.22991 | Pt | 0 | 0 | 0.00000 |
| HETATM | 115 | Pt | 14.91221 | 9.27370  | 17.22991 | Pt | 0 | 0 | 0.00000 |
| HETATM | 116 | Pt | 14.91221 | 12.06491 | 17.22991 | Pt | 0 | 0 | 0.00000 |
| HETATM | 117 | Pt | 14.91221 | 14.85612 | 17.22991 | Pt | 0 | 0 | 0.00000 |
| HETATM | 118 | Pt | 14.91221 | 17.64733 | 17.22991 | Pt | 0 | 0 | 0.00000 |
| HETATM | 119 | Pt | 14.91221 | 20.43854 | 17.22991 | Pt | 0 | 0 | 0.00000 |
| HETATM | 120 | Pt | 14.91221 | 23.22975 | 17.22991 | Pt | 0 | 0 | 0.00000 |
| HETATM | 121 | Pt | 0.40865  | 17.64733 | 17.22991 | Pt | 0 | 0 | 0.00000 |
| HETATM | 122 | Pt | 0.40865  | 20.43854 | 17.22991 | Pt | 0 | 0 | 0.00000 |
| HETATM | 123 | Pt | 0.40865  | 0.90007  | 17.22991 | Pt | 0 | 0 | 0.00000 |
| HETATM | 124 | Pt | 0.40865  | 3.69128  | 17.22991 | Pt | 0 | 0 | 0.00000 |
| HETATM | 125 | Pt | 0.40865  | 6.48249  | 17.22991 | Pt | 0 | 0 | 0.00000 |
| HETATM | 126 | Pt | 0.40865  | 9.27370  | 17.22991 | Pt | 0 | 0 | 0.00000 |
| HETATM | 127 | Pt | 0.40865  | 12.06491 | 17.22991 | Pt | 0 | 0 | 0.00000 |
| HETATM | 128 | Pt | 0.40865  | 14.85612 | 17.22991 | Pt | 0 | 0 | 0.00000 |
| HETATM | 129 | Pt | 3.63026  | 20.43830 | 19.50908 | Pt | 0 | 0 | 0.00000 |
| HETATM | 130 | Pt | 3.63168  | 23.22953 | 19.50738 | Pt | 0 | 0 | 0.00000 |
| HETATM | 131 | Pt | 3.63168  | 3.69150  | 19.50738 | Pt | 0 | 0 | 0.00000 |
| HETATM | 132 | Pt | 3.63026  | 6.48274  | 19.50908 | Pt | 0 | 0 | 0.00000 |
| HETATM | 133 | Pt | 3.63030  | 9.27383  | 19.50907 | Pt | 0 | 0 | 0.00000 |
| HETATM | 134 | Pt | 3.63133  | 12.06501 | 19.50813 | Pt | 0 | 0 | 0.00000 |
| HETATM | 135 | Pt | 3.63133  | 14.85603 | 19.50813 | Pt | 0 | 0 | 0.00000 |
| HETATM | 136 | Pt | 3.63030  | 17.64720 | 19.50906 | Pt | 0 | 0 | 0.00000 |
| HETATM | 137 | Pt | 8.46548  | 23.22980 | 19.50842 | Pt | 0 | 0 | 0.00000 |
| HETATM | 138 | Pt | 8.46548  | 26.02091 | 19.50842 | Pt | 0 | 0 | 0.00000 |
| HETATM | 139 | Pt | 8.46392  | 6.48188  | 19.50884 | Pt | 0 | 0 | 0.00000 |
| HETATM | 140 | Pt | 8.46321  | 9.27222  | 19.50820 | Pt | 0 | 0 | 0.00000 |
| HETATM | 141 | Pt | 8.46404  | 12.06419 | 19.50786 | Pt | 0 | 0 | 0.00000 |
| HETATM | 142 | Pt | 8.46404  | 14.85685 | 19.50786 | Pt | 0 | 0 | 0.00000 |
| HETATM | 143 | Pt | 8.46321  | 17.64882 | 19.50820 | Pt | 0 | 0 | 0.00000 |
| HETATM | 144 | Pt | 8.46392  | 20.43916 | 19.50884 | Pt | 0 | 0 | 0.00000 |
| HETATM | 145 | Pt | 13.29930 | 26.02159 | 19.50674 | Pt | 0 | 0 | 0.00000 |
| HETATM | 146 | Pt | 13.29842 | 28.81288 | 19.50890 | Pt | 0 | 0 | 0.00000 |
| HETATM | 147 | Pt | 13.29787 | 9.27276  | 19.50823 | Pt | 0 | 0 | 0.00000 |
| HETATM | 148 | Pt | 13.29921 | 12.06378 | 19.50317 | Pt | 0 | 0 | 0.00000 |

|        |     |    |          |          |          |    |   |   |         |
|--------|-----|----|----------|----------|----------|----|---|---|---------|
| HETATM | 149 | Pt | 13.29921 | 14.85726 | 19.50317 | Pt | 0 | 0 | 0.00000 |
| HETATM | 150 | Pt | 13.29787 | 17.64828 | 19.50823 | Pt | 0 | 0 | 0.00000 |
| HETATM | 151 | Pt | 13.29842 | 20.43784 | 19.50890 | Pt | 0 | 0 | 0.00000 |
| HETATM | 152 | Pt | 13.29930 | 23.22913 | 19.50674 | Pt | 0 | 0 | 0.00000 |
| HETATM | 153 | Pt | 18.13339 | 28.81246 | 19.50763 | Pt | 0 | 0 | 0.00000 |
| HETATM | 154 | Pt | 18.13294 | 31.60302 | 19.50804 | Pt | 0 | 0 | 0.00000 |
| HETATM | 155 | Pt | 18.13559 | 12.06452 | 19.50469 | Pt | 0 | 0 | 0.00000 |
| HETATM | 156 | Pt | 18.13559 | 14.85652 | 19.50469 | Pt | 0 | 0 | 0.00000 |
| HETATM | 157 | Pt | 18.13294 | 17.64769 | 19.50804 | Pt | 0 | 0 | 0.00000 |
| HETATM | 158 | Pt | 18.13339 | 20.43825 | 19.50763 | Pt | 0 | 0 | 0.00000 |
| HETATM | 159 | Pt | 18.13456 | 23.22944 | 19.50588 | Pt | 0 | 0 | 0.00000 |
| HETATM | 160 | Pt | 18.13456 | 26.02127 | 19.50588 | Pt | 0 | 0 | 0.00000 |
| HETATM | 161 | Pt | 6.04854  | 21.83420 | 19.51038 | Pt | 0 | 0 | 0.00000 |
| HETATM | 162 | Pt | 6.04971  | 24.62536 | 19.50958 | Pt | 0 | 0 | 0.00000 |
| HETATM | 163 | Pt | 6.04854  | 5.08683  | 19.51038 | Pt | 0 | 0 | 0.00000 |
| HETATM | 164 | Pt | 6.04757  | 7.87802  | 19.51119 | Pt | 0 | 0 | 0.00000 |
| HETATM | 165 | Pt | 6.04865  | 10.66942 | 19.51141 | Pt | 0 | 0 | 0.00000 |
| HETATM | 166 | Pt | 6.04924  | 13.46052 | 19.51162 | Pt | 0 | 0 | 0.00000 |
| HETATM | 167 | Pt | 6.04865  | 16.25162 | 19.51141 | Pt | 0 | 0 | 0.00000 |
| HETATM | 168 | Pt | 6.04757  | 19.04301 | 19.51119 | Pt | 0 | 0 | 0.00000 |
| HETATM | 169 | Pt | 10.88357 | 24.62536 | 19.50980 | Pt | 0 | 0 | 0.00000 |
| HETATM | 170 | Pt | 10.88274 | 27.41683 | 19.51019 | Pt | 0 | 0 | 0.00000 |
| HETATM | 171 | Pt | 10.88127 | 7.87708  | 19.51001 | Pt | 0 | 0 | 0.00000 |
| HETATM | 172 | Pt | 10.88110 | 10.66728 | 19.50700 | Pt | 0 | 0 | 0.00000 |
| HETATM | 173 | Pt | 10.88172 | 13.46052 | 19.50501 | Pt | 0 | 0 | 0.00000 |
| HETATM | 174 | Pt | 10.88110 | 16.25375 | 19.50700 | Pt | 0 | 0 | 0.00000 |
| HETATM | 175 | Pt | 10.88127 | 19.04395 | 19.51001 | Pt | 0 | 0 | 0.00000 |
| HETATM | 176 | Pt | 10.88274 | 21.83388 | 19.51019 | Pt | 0 | 0 | 0.00000 |
| HETATM | 177 | Pt | 15.71685 | 27.41696 | 19.50758 | Pt | 0 | 0 | 0.00000 |
| HETATM | 178 | Pt | 15.71568 | 30.20779 | 19.50977 | Pt | 0 | 0 | 0.00000 |
| HETATM | 179 | Pt | 15.71676 | 10.66853 | 19.50710 | Pt | 0 | 0 | 0.00000 |
| HETATM | 180 | Pt | 15.71880 | 13.46052 | 19.50291 | Pt | 0 | 0 | 0.00000 |
| HETATM | 181 | Pt | 15.71676 | 16.25250 | 19.50710 | Pt | 0 | 0 | 0.00000 |
| HETATM | 182 | Pt | 15.71568 | 19.04292 | 19.50977 | Pt | 0 | 0 | 0.00000 |
| HETATM | 183 | Pt | 15.71685 | 21.83376 | 19.50758 | Pt | 0 | 0 | 0.00000 |
| HETATM | 184 | Pt | 15.71761 | 24.62536 | 19.50631 | Pt | 0 | 0 | 0.00000 |
| HETATM | 185 | Pt | 1.21326  | 19.04294 | 19.51009 | Pt | 0 | 0 | 0.00000 |
| HETATM | 186 | Pt | 1.21434  | 21.83359 | 19.50872 | Pt | 0 | 0 | 0.00000 |
| HETATM | 187 | Pt | 1.21584  | 2.29568  | 19.50701 | Pt | 0 | 0 | 0.00000 |
| HETATM | 188 | Pt | 1.21434  | 5.08744  | 19.50872 | Pt | 0 | 0 | 0.00000 |
| HETATM | 189 | Pt | 1.21326  | 7.87810  | 19.51009 | Pt | 0 | 0 | 0.00000 |
| HETATM | 190 | Pt | 1.21420  | 10.66904 | 19.50873 | Pt | 0 | 0 | 0.00000 |
| HETATM | 191 | Pt | 1.21473  | 13.46052 | 19.50766 | Pt | 0 | 0 | 0.00000 |
| HETATM | 192 | Pt | 1.21420  | 16.25200 | 19.50873 | Pt | 0 | 0 | 0.00000 |
| HETATM | 193 | Pt | 2.01780  | 17.64758 | 21.79091 | Pt | 0 | 0 | 0.00000 |
| HETATM | 194 | Pt | 2.01795  | 20.43815 | 21.79131 | Pt | 0 | 0 | 0.00000 |
| HETATM | 195 | Pt | 2.02104  | 23.22904 | 21.78674 | Pt | 0 | 0 | 0.00000 |
| HETATM | 196 | Pt | 2.02104  | 3.69200  | 21.78674 | Pt | 0 | 0 | 0.00000 |
| HETATM | 197 | Pt | 2.01795  | 6.48289  | 21.79131 | Pt | 0 | 0 | 0.00000 |
| HETATM | 198 | Pt | 2.01780  | 9.27345  | 21.79091 | Pt | 0 | 0 | 0.00000 |
| HETATM | 199 | Pt | 2.01969  | 12.06506 | 21.78760 | Pt | 0 | 0 | 0.00000 |
| HETATM | 200 | Pt | 2.01969  | 14.85598 | 21.78760 | Pt | 0 | 0 | 0.00000 |
| HETATM | 201 | Pt | 6.85239  | 20.43837 | 21.79303 | Pt | 0 | 0 | 0.00000 |
| HETATM | 202 | Pt | 6.85552  | 23.22944 | 21.79140 | Pt | 0 | 0 | 0.00000 |
| HETATM | 203 | Pt | 6.85552  | 26.02127 | 21.79140 | Pt | 0 | 0 | 0.00000 |
| HETATM | 204 | Pt | 6.85239  | 6.48266  | 21.79303 | Pt | 0 | 0 | 0.00000 |
| HETATM | 205 | Pt | 6.85241  | 9.27362  | 21.79424 | Pt | 0 | 0 | 0.00000 |
| HETATM | 206 | Pt | 6.85520  | 12.06514 | 21.79574 | Pt | 0 | 0 | 0.00000 |
| HETATM | 207 | Pt | 6.85520  | 14.85589 | 21.79574 | Pt | 0 | 0 | 0.00000 |
| HETATM | 208 | Pt | 6.85241  | 17.64741 | 21.79424 | Pt | 0 | 0 | 0.00000 |
| HETATM | 209 | Pt | 11.68983 | 23.22811 | 21.79007 | Pt | 0 | 0 | 0.00000 |
| HETATM | 210 | Pt | 11.68983 | 26.02260 | 21.79007 | Pt | 0 | 0 | 0.00000 |
| HETATM | 211 | Pt | 11.68756 | 28.81371 | 21.79314 | Pt | 0 | 0 | 0.00000 |

|        |     |    |          |          |          |    |   |   |         |
|--------|-----|----|----------|----------|----------|----|---|---|---------|
| HETATM | 212 | Pt | 11.68472 | 9.27139  | 21.79017 | Pt | 0 | 0 | 0.00000 |
| HETATM | 213 | Pt | 11.68693 | 12.06229 | 21.77763 | Pt | 0 | 0 | 0.00000 |
| HETATM | 214 | Pt | 11.68693 | 14.85875 | 21.77763 | Pt | 0 | 0 | 0.00000 |
| HETATM | 215 | Pt | 11.68472 | 17.64965 | 21.79017 | Pt | 0 | 0 | 0.00000 |
| HETATM | 216 | Pt | 11.68756 | 20.43700 | 21.79314 | Pt | 0 | 0 | 0.00000 |
| HETATM | 217 | Pt | 16.52322 | 26.02152 | 21.78366 | Pt | 0 | 0 | 0.00000 |
| HETATM | 218 | Pt | 16.52014 | 28.81248 | 21.78798 | Pt | 0 | 0 | 0.00000 |
| HETATM | 219 | Pt | 16.51866 | 31.60337 | 21.78982 | Pt | 0 | 0 | 0.00000 |
| HETATM | 220 | Pt | 16.52499 | 12.06495 | 21.77907 | Pt | 0 | 0 | 0.00000 |
| HETATM | 221 | Pt | 16.52499 | 14.85608 | 21.77907 | Pt | 0 | 0 | 0.00000 |
| HETATM | 222 | Pt | 16.51866 | 17.64734 | 21.78982 | Pt | 0 | 0 | 0.00000 |
| HETATM | 223 | Pt | 16.52014 | 20.43824 | 21.78798 | Pt | 0 | 0 | 0.00000 |
| HETATM | 224 | Pt | 16.52322 | 23.22919 | 21.78366 | Pt | 0 | 0 | 0.00000 |
| HETATM | 225 | Pt | 4.43323  | 19.04243 | 21.78778 | Pt | 0 | 0 | 0.00000 |
| HETATM | 226 | Pt | 4.43511  | 21.83389 | 21.78597 | Pt | 0 | 0 | 0.00000 |
| HETATM | 227 | Pt | 4.43746  | 24.62536 | 21.78318 | Pt | 0 | 0 | 0.00000 |
| HETATM | 228 | Pt | 4.43511  | 5.08714  | 21.78597 | Pt | 0 | 0 | 0.00000 |
| HETATM | 229 | Pt | 4.43323  | 7.87861  | 21.78778 | Pt | 0 | 0 | 0.00000 |
| HETATM | 230 | Pt | 4.43528  | 10.67001 | 21.78643 | Pt | 0 | 0 | 0.00000 |
| HETATM | 231 | Pt | 4.43627  | 13.46052 | 21.78638 | Pt | 0 | 0 | 0.00000 |
| HETATM | 232 | Pt | 4.43528  | 16.25102 | 21.78643 | Pt | 0 | 0 | 0.00000 |
| HETATM | 233 | Pt | 9.26971  | 21.83350 | 21.78587 | Pt | 0 | 0 | 0.00000 |
| HETATM | 234 | Pt | 9.27132  | 24.62536 | 21.78495 | Pt | 0 | 0 | 0.00000 |
| HETATM | 235 | Pt | 9.26971  | 27.41722 | 21.78587 | Pt | 0 | 0 | 0.00000 |
| HETATM | 236 | Pt | 9.26676  | 7.87664  | 21.78658 | Pt | 0 | 0 | 0.00000 |
| HETATM | 237 | Pt | 9.26636  | 10.66560 | 21.78239 | Pt | 0 | 0 | 0.00000 |
| HETATM | 238 | Pt | 9.26846  | 13.46052 | 21.78016 | Pt | 0 | 0 | 0.00000 |
| HETATM | 239 | Pt | 9.26636  | 16.25543 | 21.78239 | Pt | 0 | 0 | 0.00000 |
| HETATM | 240 | Pt | 9.26676  | 19.04439 | 21.78658 | Pt | 0 | 0 | 0.00000 |
| HETATM | 241 | Pt | 14.10439 | 24.62536 | 21.77873 | Pt | 0 | 0 | 0.00000 |
| HETATM | 242 | Pt | 14.10378 | 27.41886 | 21.78310 | Pt | 0 | 0 | 0.00000 |
| HETATM | 243 | Pt | 14.10157 | 30.20895 | 21.78926 | Pt | 0 | 0 | 0.00000 |
| HETATM | 244 | Pt | 14.10270 | 10.66750 | 21.78123 | Pt | 0 | 0 | 0.00000 |
| HETATM | 245 | Pt | 14.10716 | 13.46052 | 21.76920 | Pt | 0 | 0 | 0.00000 |
| HETATM | 246 | Pt | 14.10270 | 16.25354 | 21.78123 | Pt | 0 | 0 | 0.00000 |
| HETATM | 247 | Pt | 14.10157 | 19.04177 | 21.78926 | Pt | 0 | 0 | 0.00000 |
| HETATM | 248 | Pt | 14.10378 | 21.83186 | 21.78310 | Pt | 0 | 0 | 0.00000 |
| HETATM | 249 | Pt | 18.93881 | 27.41749 | 21.78265 | Pt | 0 | 0 | 0.00000 |
| HETATM | 250 | Pt | 18.93610 | 30.20795 | 21.78587 | Pt | 0 | 0 | 0.00000 |
| HETATM | 251 | Pt | 18.93842 | 32.99801 | 21.78238 | Pt | 0 | 0 | 0.00000 |
| HETATM | 252 | Pt | 18.94255 | 13.46052 | 21.77809 | Pt | 0 | 0 | 0.00000 |
| HETATM | 253 | Pt | 18.93842 | 16.25270 | 21.78238 | Pt | 0 | 0 | 0.00000 |
| HETATM | 254 | Pt | 18.93610 | 19.04276 | 21.78587 | Pt | 0 | 0 | 0.00000 |
| HETATM | 255 | Pt | 18.93881 | 21.83322 | 21.78265 | Pt | 0 | 0 | 0.00000 |
| HETATM | 256 | Pt | 18.93958 | 24.62536 | 21.78000 | Pt | 0 | 0 | 0.00000 |
| HETATM | 257 | Pt | 2.82377  | 19.04292 | 24.07566 | Pt | 0 | 0 | 0.00000 |
| HETATM | 258 | Pt | 2.82699  | 21.83332 | 24.07212 | Pt | 0 | 0 | 0.00000 |
| HETATM | 259 | Pt | 2.83116  | 2.29568  | 24.06425 | Pt | 0 | 0 | 0.00000 |
| HETATM | 260 | Pt | 2.82699  | 5.08771  | 24.07212 | Pt | 0 | 0 | 0.00000 |
| HETATM | 261 | Pt | 2.82377  | 7.87812  | 24.07566 | Pt | 0 | 0 | 0.00000 |
| HETATM | 262 | Pt | 2.82729  | 10.67000 | 24.06915 | Pt | 0 | 0 | 0.00000 |
| HETATM | 263 | Pt | 2.82860  | 13.46052 | 24.06903 | Pt | 0 | 0 | 0.00000 |
| HETATM | 264 | Pt | 2.82729  | 16.25103 | 24.06915 | Pt | 0 | 0 | 0.00000 |
| HETATM | 265 | Pt | 7.66581  | 21.83141 | 24.07483 | Pt | 0 | 0 | 0.00000 |
| HETATM | 266 | Pt | 7.66664  | 24.62536 | 24.07328 | Pt | 0 | 0 | 0.00000 |
| HETATM | 267 | Pt | 7.66581  | 5.08962  | 24.07483 | Pt | 0 | 0 | 0.00000 |
| HETATM | 268 | Pt | 7.66162  | 7.87820  | 24.07766 | Pt | 0 | 0 | 0.00000 |
| HETATM | 269 | Pt | 7.66395  | 10.66896 | 24.08109 | Pt | 0 | 0 | 0.00000 |
| HETATM | 270 | Pt | 7.67126  | 13.46052 | 24.08295 | Pt | 0 | 0 | 0.00000 |
| HETATM | 271 | Pt | 7.66395  | 16.25208 | 24.08109 | Pt | 0 | 0 | 0.00000 |
| HETATM | 272 | Pt | 7.66162  | 19.04284 | 24.07766 | Pt | 0 | 0 | 0.00000 |
| HETATM | 273 | Pt | 12.50023 | 24.62536 | 24.06606 | Pt | 0 | 0 | 0.00000 |
| HETATM | 274 | Pt | 12.50276 | 27.42441 | 24.07356 | Pt | 0 | 0 | 0.00000 |

|        |     |    |          |          |          |    |   |   |         |
|--------|-----|----|----------|----------|----------|----|---|---|---------|
| HETATM | 275 | Pt | 12.49721 | 7.88271  | 24.08191 | Pt | 0 | 0 | 0.00000 |
| HETATM | 276 | Pt | 12.49339 | 10.66613 | 24.06248 | Pt | 0 | 0 | 0.00000 |
| HETATM | 277 | Pt | 12.50381 | 13.46052 | 24.03540 | Pt | 0 | 0 | 0.00000 |
| HETATM | 278 | Pt | 12.49339 | 16.25490 | 24.06248 | Pt | 0 | 0 | 0.00000 |
| HETATM | 279 | Pt | 12.49721 | 19.03833 | 24.08191 | Pt | 0 | 0 | 0.00000 |
| HETATM | 280 | Pt | 12.50276 | 21.82631 | 24.07356 | Pt | 0 | 0 | 0.00000 |
| HETATM | 281 | Pt | 17.33274 | 27.41856 | 24.06409 | Pt | 0 | 0 | 0.00000 |
| HETATM | 282 | Pt | 17.32358 | 30.20717 | 24.06904 | Pt | 0 | 0 | 0.00000 |
| HETATM | 283 | Pt | 17.32666 | 10.67109 | 24.06213 | Pt | 0 | 0 | 0.00000 |
| HETATM | 284 | Pt | 17.33908 | 13.46052 | 24.05416 | Pt | 0 | 0 | 0.00000 |
| HETATM | 285 | Pt | 17.32666 | 16.24995 | 24.06213 | Pt | 0 | 0 | 0.00000 |
| HETATM | 286 | Pt | 17.32358 | 19.04354 | 24.06904 | Pt | 0 | 0 | 0.00000 |
| HETATM | 287 | Pt | 17.33274 | 21.83215 | 24.06409 | Pt | 0 | 0 | 0.00000 |
| HETATM | 288 | Pt | 17.33203 | 24.62536 | 24.05973 | Pt | 0 | 0 | 0.00000 |
| HETATM | 289 | Pt | 5.23201  | 20.43768 | 24.06425 | Pt | 0 | 0 | 0.00000 |
| HETATM | 290 | Pt | 5.23755  | 23.22989 | 24.06069 | Pt | 0 | 0 | 0.00000 |
| HETATM | 291 | Pt | 5.23755  | 3.69114  | 24.06069 | Pt | 0 | 0 | 0.00000 |
| HETATM | 292 | Pt | 5.23201  | 6.48335  | 24.06425 | Pt | 0 | 0 | 0.00000 |
| HETATM | 293 | Pt | 5.23356  | 9.27492  | 24.06451 | Pt | 0 | 0 | 0.00000 |
| HETATM | 294 | Pt | 5.23690  | 12.06561 | 24.06545 | Pt | 0 | 0 | 0.00000 |
| HETATM | 295 | Pt | 5.23690  | 14.85543 | 24.06545 | Pt | 0 | 0 | 0.00000 |
| HETATM | 296 | Pt | 5.23356  | 17.64612 | 24.06451 | Pt | 0 | 0 | 0.00000 |
| HETATM | 297 | Pt | 10.07237 | 23.22788 | 24.05913 | Pt | 0 | 0 | 0.00000 |
| HETATM | 298 | Pt | 10.07237 | 26.02283 | 24.05913 | Pt | 0 | 0 | 0.00000 |
| HETATM | 299 | Pt | 10.06983 | 6.48514  | 24.06396 | Pt | 0 | 0 | 0.00000 |
| HETATM | 300 | Pt | 10.06503 | 9.27158  | 24.06403 | Pt | 0 | 0 | 0.00000 |
| HETATM | 301 | Pt | 10.06737 | 12.05798 | 24.04349 | Pt | 0 | 0 | 0.00000 |
| HETATM | 302 | Pt | 10.06737 | 14.86306 | 24.04349 | Pt | 0 | 0 | 0.00000 |
| HETATM | 303 | Pt | 10.06503 | 17.64945 | 24.06403 | Pt | 0 | 0 | 0.00000 |
| HETATM | 304 | Pt | 10.06983 | 20.43590 | 24.06396 | Pt | 0 | 0 | 0.00000 |
| HETATM | 305 | Pt | 14.90414 | 26.02232 | 24.04948 | Pt | 0 | 0 | 0.00000 |
| HETATM | 306 | Pt | 14.90294 | 28.81647 | 24.06506 | Pt | 0 | 0 | 0.00000 |
| HETATM | 307 | Pt | 14.89911 | 9.27481  | 24.07155 | Pt | 0 | 0 | 0.00000 |
| HETATM | 308 | Pt | 14.90992 | 12.06330 | 24.04174 | Pt | 0 | 0 | 0.00000 |
| HETATM | 309 | Pt | 14.90992 | 14.85774 | 24.04174 | Pt | 0 | 0 | 0.00000 |
| HETATM | 310 | Pt | 14.89911 | 17.64623 | 24.07155 | Pt | 0 | 0 | 0.00000 |
| HETATM | 311 | Pt | 14.90294 | 20.43424 | 24.06506 | Pt | 0 | 0 | 0.00000 |
| HETATM | 312 | Pt | 14.90414 | 23.22839 | 24.04948 | Pt | 0 | 0 | 0.00000 |
| HETATM | 313 | Pt | 0.39812  | 17.64963 | 24.06365 | Pt | 0 | 0 | 0.00000 |
| HETATM | 314 | Pt | 0.39807  | 20.43820 | 24.06295 | Pt | 0 | 0 | 0.00000 |
| HETATM | 315 | Pt | 0.40363  | 0.89760  | 24.05432 | Pt | 0 | 0 | 0.00000 |
| HETATM | 316 | Pt | 0.40363  | 3.69376  | 24.05432 | Pt | 0 | 0 | 0.00000 |
| HETATM | 317 | Pt | 0.39807  | 6.48284  | 24.06295 | Pt | 0 | 0 | 0.00000 |
| HETATM | 318 | Pt | 0.39812  | 9.27141  | 24.06365 | Pt | 0 | 0 | 0.00000 |
| HETATM | 319 | Pt | 0.40054  | 12.06510 | 24.05592 | Pt | 0 | 0 | 0.00000 |
| HETATM | 320 | Pt | 0.40054  | 14.85593 | 24.05592 | Pt | 0 | 0 | 0.00000 |
| HETATM | 321 | Pt | 3.60735  | 20.43815 | 26.38823 | Pt | 0 | 0 | 0.00000 |
| HETATM | 322 | Pt | 3.61463  | 23.22841 | 26.37474 | Pt | 0 | 0 | 0.00000 |
| HETATM | 323 | Pt | 3.61463  | 3.69262  | 26.37474 | Pt | 0 | 0 | 0.00000 |
| HETATM | 324 | Pt | 3.60735  | 6.48289  | 26.38823 | Pt | 0 | 0 | 0.00000 |
| HETATM | 325 | Pt | 3.60990  | 9.27347  | 26.37975 | Pt | 0 | 0 | 0.00000 |
| HETATM | 326 | Pt | 3.61258  | 12.06500 | 26.38066 | Pt | 0 | 0 | 0.00000 |
| HETATM | 327 | Pt | 3.61258  | 14.85604 | 26.38066 | Pt | 0 | 0 | 0.00000 |
| HETATM | 328 | Pt | 3.60990  | 17.64756 | 26.37975 | Pt | 0 | 0 | 0.00000 |
| HETATM | 329 | Pt | 8.45236  | 23.22606 | 26.38489 | Pt | 0 | 0 | 0.00000 |
| HETATM | 330 | Pt | 8.45236  | 26.02465 | 26.38489 | Pt | 0 | 0 | 0.00000 |
| HETATM | 331 | Pt | 8.46044  | 6.49149  | 26.39578 | Pt | 0 | 0 | 0.00000 |
| HETATM | 332 | Pt | 8.44742  | 9.26818  | 26.40055 | Pt | 0 | 0 | 0.00000 |
| HETATM | 333 | Pt | 8.46979  | 12.05796 | 26.40434 | Pt | 0 | 0 | 0.00000 |
| HETATM | 334 | Pt | 8.46979  | 14.86308 | 26.40434 | Pt | 0 | 0 | 0.00000 |
| HETATM | 335 | Pt | 8.44742  | 17.65285 | 26.40055 | Pt | 0 | 0 | 0.00000 |
| HETATM | 336 | Pt | 8.46044  | 20.42955 | 26.39578 | Pt | 0 | 0 | 0.00000 |
| HETATM | 337 | Pt | 13.28383 | 26.02770 | 26.37256 | Pt | 0 | 0 | 0.00000 |

|        |     |    |          |          |          |    |   |   |         |
|--------|-----|----|----------|----------|----------|----|---|---|---------|
| HETATM | 338 | Pt | 13.29823 | 28.84482 | 26.40720 | Pt | 0 | 0 | 0.00000 |
| HETATM | 339 | Pt | 13.27746 | 9.29547  | 26.41259 | Pt | 0 | 0 | 0.00000 |
| HETATM | 340 | Pt | 13.29879 | 12.05884 | 26.33159 | Pt | 0 | 0 | 0.00000 |
| HETATM | 341 | Pt | 13.29879 | 14.86220 | 26.33159 | Pt | 0 | 0 | 0.00000 |
| HETATM | 342 | Pt | 13.27746 | 17.62556 | 26.41259 | Pt | 0 | 0 | 0.00000 |
| HETATM | 343 | Pt | 13.29823 | 20.40589 | 26.40720 | Pt | 0 | 0 | 0.00000 |
| HETATM | 344 | Pt | 13.28383 | 23.22301 | 26.37256 | Pt | 0 | 0 | 0.00000 |
| HETATM | 345 | Pt | 18.11454 | 28.82572 | 26.38257 | Pt | 0 | 0 | 0.00000 |
| HETATM | 346 | Pt | 18.10101 | 31.60755 | 26.35790 | Pt | 0 | 0 | 0.00000 |
| HETATM | 347 | Pt | 18.12470 | 12.05862 | 26.36252 | Pt | 0 | 0 | 0.00000 |
| HETATM | 348 | Pt | 18.12470 | 14.86242 | 26.36252 | Pt | 0 | 0 | 0.00000 |
| HETATM | 349 | Pt | 18.10101 | 17.64317 | 26.35790 | Pt | 0 | 0 | 0.00000 |
| HETATM | 350 | Pt | 18.11454 | 20.42500 | 26.38257 | Pt | 0 | 0 | 0.00000 |
| HETATM | 351 | Pt | 18.11324 | 23.22815 | 26.36790 | Pt | 0 | 0 | 0.00000 |
| HETATM | 352 | Pt | 18.11324 | 26.02257 | 26.36790 | Pt | 0 | 0 | 0.00000 |
| HETATM | 353 | Pt | 6.05530  | 21.83389 | 26.30948 | Pt | 0 | 0 | 0.00000 |
| HETATM | 354 | Pt | 6.05769  | 24.62536 | 26.31495 | Pt | 0 | 0 | 0.00000 |
| HETATM | 355 | Pt | 6.05530  | 5.08714  | 26.30948 | Pt | 0 | 0 | 0.00000 |
| HETATM | 356 | Pt | 6.05056  | 7.87906  | 26.31482 | Pt | 0 | 0 | 0.00000 |
| HETATM | 357 | Pt | 6.05578  | 10.66864 | 26.31917 | Pt | 0 | 0 | 0.00000 |
| HETATM | 358 | Pt | 6.06406  | 13.46052 | 26.31598 | Pt | 0 | 0 | 0.00000 |
| HETATM | 359 | Pt | 6.05578  | 16.25240 | 26.31917 | Pt | 0 | 0 | 0.00000 |
| HETATM | 360 | Pt | 6.05056  | 19.04197 | 26.31482 | Pt | 0 | 0 | 0.00000 |
| HETATM | 361 | Pt | 10.89017 | 24.62536 | 26.30242 | Pt | 0 | 0 | 0.00000 |
| HETATM | 362 | Pt | 10.89749 | 27.41903 | 26.30410 | Pt | 0 | 0 | 0.00000 |
| HETATM | 363 | Pt | 10.88753 | 7.88630  | 26.31822 | Pt | 0 | 0 | 0.00000 |
| HETATM | 364 | Pt | 10.88313 | 10.67324 | 26.30932 | Pt | 0 | 0 | 0.00000 |
| HETATM | 365 | Pt | 10.88966 | 13.46052 | 26.24059 | Pt | 0 | 0 | 0.00000 |
| HETATM | 366 | Pt | 10.88313 | 16.24779 | 26.30932 | Pt | 0 | 0 | 0.00000 |
| HETATM | 367 | Pt | 10.88753 | 19.03473 | 26.31822 | Pt | 0 | 0 | 0.00000 |
| HETATM | 368 | Pt | 10.89749 | 21.83169 | 26.30410 | Pt | 0 | 0 | 0.00000 |
| HETATM | 369 | Pt | 15.72315 | 27.41266 | 26.29666 | Pt | 0 | 0 | 0.00000 |
| HETATM | 370 | Pt | 15.71493 | 30.21072 | 26.33359 | Pt | 0 | 0 | 0.00000 |
| HETATM | 371 | Pt | 15.71136 | 10.66945 | 26.31895 | Pt | 0 | 0 | 0.00000 |
| HETATM | 372 | Pt | 15.72852 | 13.46052 | 26.27973 | Pt | 0 | 0 | 0.00000 |
| HETATM | 373 | Pt | 15.71136 | 16.25159 | 26.31895 | Pt | 0 | 0 | 0.00000 |
| HETATM | 374 | Pt | 15.71493 | 19.03999 | 26.33359 | Pt | 0 | 0 | 0.00000 |
| HETATM | 375 | Pt | 15.72315 | 21.83806 | 26.29666 | Pt | 0 | 0 | 0.00000 |
| HETATM | 376 | Pt | 15.71642 | 24.62536 | 26.29083 | Pt | 0 | 0 | 0.00000 |
| HETATM | 377 | Pt | 1.20957  | 19.04403 | 26.32726 | Pt | 0 | 0 | 0.00000 |
| HETATM | 378 | Pt | 1.21405  | 21.83338 | 26.31985 | Pt | 0 | 0 | 0.00000 |
| HETATM | 379 | Pt | 1.21889  | 2.29568  | 26.29836 | Pt | 0 | 0 | 0.00000 |
| HETATM | 380 | Pt | 1.21405  | 5.08765  | 26.31985 | Pt | 0 | 0 | 0.00000 |
| HETATM | 381 | Pt | 1.20957  | 7.87701  | 26.32726 | Pt | 0 | 0 | 0.00000 |
| HETATM | 382 | Pt | 1.21460  | 10.67213 | 26.30792 | Pt | 0 | 0 | 0.00000 |
| HETATM | 383 | Pt | 1.21638  | 13.46052 | 26.30891 | Pt | 0 | 0 | 0.00000 |
| HETATM | 384 | Pt | 1.21460  | 16.24891 | 26.30792 | Pt | 0 | 0 | 0.00000 |
| HETATM | 385 | Pt | 2.01930  | 17.65664 | 28.89675 | Pt | 0 | 0 | 0.00000 |
| HETATM | 386 | Pt | 2.05062  | 20.43978 | 28.97952 | Pt | 0 | 0 | 0.00000 |
| HETATM | 387 | Pt | 2.02628  | 23.22612 | 28.88796 | Pt | 0 | 0 | 0.00000 |
| HETATM | 388 | Pt | 2.02628  | 3.69491  | 28.88796 | Pt | 0 | 0 | 0.00000 |
| HETATM | 389 | Pt | 2.05062  | 6.48126  | 28.97952 | Pt | 0 | 0 | 0.00000 |
| HETATM | 390 | Pt | 2.01930  | 9.26440  | 28.89674 | Pt | 0 | 0 | 0.00000 |
| HETATM | 391 | Pt | 2.03265  | 12.05827 | 28.93720 | Pt | 0 | 0 | 0.00000 |
| HETATM | 392 | Pt | 2.03265  | 14.86276 | 28.93720 | Pt | 0 | 0 | 0.00000 |
| HETATM | 393 | Pt | 6.93057  | 20.42671 | 28.89119 | Pt | 0 | 0 | 0.00000 |
| HETATM | 394 | Pt | 6.89422  | 23.22196 | 28.94602 | Pt | 0 | 0 | 0.00000 |
| HETATM | 395 | Pt | 6.89422  | 26.02875 | 28.94602 | Pt | 0 | 0 | 0.00000 |
| HETATM | 396 | Pt | 6.93057  | 6.49432  | 28.89119 | Pt | 0 | 0 | 0.00000 |
| HETATM | 397 | Pt | 6.90217  | 9.27138  | 28.97690 | Pt | 0 | 0 | 0.00000 |
| HETATM | 398 | Pt | 6.90092  | 12.05012 | 28.93008 | Pt | 0 | 0 | 0.00000 |
| HETATM | 399 | Pt | 6.90092  | 14.87091 | 28.93008 | Pt | 0 | 0 | 0.00000 |
| HETATM | 400 | Pt | 6.90217  | 17.64966 | 28.97690 | Pt | 0 | 0 | 0.00000 |

|        |     |    |          |          |          |    |   |   |         |
|--------|-----|----|----------|----------|----------|----|---|---|---------|
| HETATM | 401 | Pt | 11.71036 | 23.17009 | 28.91292 | Pt | 0 | 0 | 0.00000 |
| HETATM | 402 | Pt | 11.71036 | 26.08063 | 28.91292 | Pt | 0 | 0 | 0.00000 |
| HETATM | 403 | Pt | 11.77601 | 28.94722 | 28.88617 | Pt | 0 | 0 | 0.00000 |
| HETATM | 404 | Pt | 11.75132 | 9.36204  | 29.89271 | Pt | 0 | 0 | 0.00000 |
| HETATM | 405 | Pt | 11.72170 | 12.03304 | 28.78400 | Pt | 0 | 0 | 0.00000 |
| HETATM | 406 | Pt | 11.72170 | 14.88800 | 28.78400 | Pt | 0 | 0 | 0.00000 |
| HETATM | 407 | Pt | 11.75132 | 17.55899 | 29.89271 | Pt | 0 | 0 | 0.00000 |
| HETATM | 408 | Pt | 11.77601 | 20.30349 | 28.88617 | Pt | 0 | 0 | 0.00000 |
| HETATM | 409 | Pt | 16.52296 | 26.07275 | 28.89548 | Pt | 0 | 0 | 0.00000 |
| HETATM | 410 | Pt | 16.50543 | 28.92447 | 28.88139 | Pt | 0 | 0 | 0.00000 |
| HETATM | 411 | Pt | 16.56469 | 31.66318 | 29.85629 | Pt | 0 | 0 | 0.00000 |
| HETATM | 412 | Pt | 16.52219 | 12.05220 | 28.79564 | Pt | 0 | 0 | 0.00000 |
| HETATM | 413 | Pt | 16.52219 | 14.86883 | 28.79564 | Pt | 0 | 0 | 0.00000 |
| HETATM | 414 | Pt | 16.56469 | 17.58753 | 29.85629 | Pt | 0 | 0 | 0.00000 |
| HETATM | 415 | Pt | 16.50543 | 20.32624 | 28.88139 | Pt | 0 | 0 | 0.00000 |
| HETATM | 416 | Pt | 16.52296 | 23.17796 | 28.89548 | Pt | 0 | 0 | 0.00000 |
| HETATM | 417 | Pt | 4.42346  | 19.04336 | 28.65779 | Pt | 0 | 0 | 0.00000 |
| HETATM | 418 | Pt | 4.42507  | 21.83277 | 28.65575 | Pt | 0 | 0 | 0.00000 |
| HETATM | 419 | Pt | 4.41496  | 24.62536 | 28.64501 | Pt | 0 | 0 | 0.00000 |
| HETATM | 420 | Pt | 4.42507  | 5.08827  | 28.65575 | Pt | 0 | 0 | 0.00000 |
| HETATM | 421 | Pt | 4.42346  | 7.87768  | 28.65779 | Pt | 0 | 0 | 0.00000 |
| HETATM | 422 | Pt | 4.41761  | 10.66622 | 28.65349 | Pt | 0 | 0 | 0.00000 |
| HETATM | 423 | Pt | 4.41447  | 13.46052 | 28.65160 | Pt | 0 | 0 | 0.00000 |
| HETATM | 424 | Pt | 4.41761  | 16.25481 | 28.65349 | Pt | 0 | 0 | 0.00000 |
| HETATM | 425 | Pt | 9.28697  | 21.83183 | 28.65122 | Pt | 0 | 0 | 0.00000 |
| HETATM | 426 | Pt | 9.26435  | 24.62536 | 28.65504 | Pt | 0 | 0 | 0.00000 |
| HETATM | 427 | Pt | 9.28697  | 27.41888 | 28.65122 | Pt | 0 | 0 | 0.00000 |
| HETATM | 428 | Pt | 9.33152  | 7.91165  | 28.70516 | Pt | 0 | 0 | 0.00000 |
| HETATM | 429 | Pt | 9.33335  | 10.61008 | 28.67170 | Pt | 0 | 0 | 0.00000 |
| HETATM | 430 | Pt | 9.27124  | 13.46052 | 28.77579 | Pt | 0 | 0 | 0.00000 |
| HETATM | 431 | Pt | 9.33335  | 16.31096 | 28.67170 | Pt | 0 | 0 | 0.00000 |
| HETATM | 432 | Pt | 9.33152  | 19.00939 | 28.70516 | Pt | 0 | 0 | 0.00000 |
| HETATM | 433 | Pt | 14.06221 | 24.62536 | 28.64918 | Pt | 0 | 0 | 0.00000 |
| HETATM | 434 | Pt | 14.09025 | 27.42844 | 28.63770 | Pt | 0 | 0 | 0.00000 |
| HETATM | 435 | Pt | 14.11492 | 30.37853 | 28.76722 | Pt | 0 | 0 | 0.00000 |
| HETATM | 436 | Pt | 14.10605 | 10.68221 | 28.80053 | Pt | 0 | 0 | 0.00000 |
| HETATM | 437 | Pt | 14.13032 | 13.46052 | 28.49631 | Pt | 0 | 0 | 0.00000 |
| HETATM | 438 | Pt | 14.10605 | 16.23883 | 28.80053 | Pt | 0 | 0 | 0.00000 |
| HETATM | 439 | Pt | 14.11492 | 18.87219 | 28.76722 | Pt | 0 | 0 | 0.00000 |
| HETATM | 440 | Pt | 14.09025 | 21.82227 | 28.63770 | Pt | 0 | 0 | 0.00000 |
| HETATM | 441 | Pt | 18.89247 | 27.43468 | 28.63752 | Pt | 0 | 0 | 0.00000 |
| HETATM | 442 | Pt | 18.86750 | 30.28904 | 28.69776 | Pt | 0 | 0 | 0.00000 |
| HETATM | 443 | Pt | 18.87379 | 32.94717 | 28.68338 | Pt | 0 | 0 | 0.00000 |
| HETATM | 444 | Pt | 18.90861 | 13.46052 | 28.62651 | Pt | 0 | 0 | 0.00000 |
| HETATM | 445 | Pt | 18.87379 | 16.30355 | 28.68338 | Pt | 0 | 0 | 0.00000 |
| HETATM | 446 | Pt | 18.86750 | 18.96168 | 28.69776 | Pt | 0 | 0 | 0.00000 |
| HETATM | 447 | Pt | 18.89247 | 21.81603 | 28.63752 | Pt | 0 | 0 | 0.00000 |
| HETATM | 448 | Pt | 18.88828 | 24.62536 | 28.64646 | Pt | 0 | 0 | 0.00000 |
| HETATM | 449 | O  | 3.00765  | 19.02212 | 29.95128 | O  | 0 | 0 | 0.00000 |
| HETATM | 450 | O  | 3.01275  | 21.86174 | 29.94851 | O  | 0 | 0 | 0.00000 |
| HETATM | 451 | O  | 2.98300  | 2.29568  | 29.91368 | O  | 0 | 0 | 0.00000 |
| HETATM | 452 | O  | 3.01275  | 5.05929  | 29.94851 | O  | 0 | 0 | 0.00000 |
| HETATM | 453 | O  | 3.00765  | 7.89891  | 29.95128 | O  | 0 | 0 | 0.00000 |
| HETATM | 454 | O  | 2.99222  | 10.65228 | 29.93449 | O  | 0 | 0 | 0.00000 |
| HETATM | 455 | O  | 3.01551  | 13.46052 | 29.94696 | O  | 0 | 0 | 0.00000 |
| HETATM | 456 | O  | 2.99222  | 16.26876 | 29.93449 | O  | 0 | 0 | 0.00000 |
| HETATM | 457 | O  | 7.87713  | 21.81661 | 29.93727 | O  | 0 | 0 | 0.00000 |
| HETATM | 458 | O  | 7.87302  | 24.62536 | 29.95227 | O  | 0 | 0 | 0.00000 |
| HETATM | 459 | O  | 7.87713  | 5.10442  | 29.93727 | O  | 0 | 0 | 0.00000 |
| HETATM | 460 | O  | 7.86944  | 7.83943  | 29.96285 | O  | 0 | 0 | 0.00000 |
| HETATM | 461 | O  | 7.87943  | 10.67443 | 29.95987 | O  | 0 | 0 | 0.00000 |
| HETATM | 462 | O  | 7.76897  | 13.46052 | 30.00444 | O  | 0 | 0 | 0.00000 |
| HETATM | 463 | O  | 7.87943  | 16.24660 | 29.95987 | O  | 0 | 0 | 0.00000 |

|                  |     |   |               |          |          |   |   |   |         |
|------------------|-----|---|---------------|----------|----------|---|---|---|---------|
| HETATM           | 464 | O | 7.86944       | 19.08161 | 29.96285 | O | 0 | 0 | 0.00000 |
| HETATM           | 465 | O | 12.68735      | 24.62536 | 29.92695 | O | 0 | 0 | 0.00000 |
| HETATM           | 466 | O | 12.66973      | 27.46021 | 29.90821 | O | 0 | 0 | 0.00000 |
| HETATM           | 467 | O | 12.85250      | 7.67724  | 30.12692 | O | 0 | 0 | 0.00000 |
| HETATM           | 468 | O | 12.80950      | 11.08126 | 30.10946 | O | 0 | 0 | 0.00000 |
| HETATM           | 469 | O | 10.95597      | 13.46052 | 29.88542 | O | 0 | 0 | 0.00000 |
| HETATM           | 470 | O | 12.80950      | 15.83977 | 30.10946 | O | 0 | 0 | 0.00000 |
| HETATM           | 471 | O | 12.85250      | 19.24380 | 30.12692 | O | 0 | 0 | 0.00000 |
| HETATM           | 472 | O | 12.66973      | 21.79050 | 29.90821 | O | 0 | 0 | 0.00000 |
| HETATM           | 473 | O | 17.44928      | 27.44310 | 29.90142 | O | 0 | 0 | 0.00000 |
| HETATM           | 474 | O | 17.63359      | 29.97400 | 30.10657 | O | 0 | 0 | 0.00000 |
| HETATM           | 475 | O | 17.65479      | 10.97936 | 30.07988 | O | 0 | 0 | 0.00000 |
| HETATM           | 476 | O | 17.36887      | 13.46052 | 29.84033 | O | 0 | 0 | 0.00000 |
| HETATM           | 477 | O | 17.65479      | 15.94168 | 30.07988 | O | 0 | 0 | 0.00000 |
| HETATM           | 478 | O | 17.63359      | 19.27671 | 30.10657 | O | 0 | 0 | 0.00000 |
| HETATM           | 479 | O | 17.44928      | 21.80761 | 29.90142 | O | 0 | 0 | 0.00000 |
| HETATM           | 480 | O | 17.50313      | 24.62536 | 29.91918 | O | 0 | 0 | 0.00000 |
| UNIT ENERGY kcal |     |   |               |          |          |   |   |   |         |
| ENERGY           |     |   | -60160.547770 |          |          |   |   |   |         |
| END              |     |   |               |          |          |   |   |   |         |
