# Supplementary material for: Development of a ReaxFF potential for Pt–O systems describing the energetics and dynamics of Pt-oxide formation
Source: Royal Society of Chemistry journal article supplement (doi:10.1039/c4cp03111c), 2014-01-01
Supplement: c4cp03111c1.zip [file c4cp03111c1.zip]

```

XTLGRF 200
DESCRP IS
REMARK Pt111_0.33ML_9x9x7_30.0_vac hcp-displacement
FIXATOMS      1      162
CRYSTX      25.12092    25.12092    43.67409    90.00000    90.00000    60.00000
FORMAT ATOM      (a6,lx,i5,lx,a5,lx,a3,lx,a1,lx,a5,3f10.5,lx,a5,i3,i2,lx,f8.5)
HETATM      1 Pt      2.20033    1.79823    14.95718    Pt    0 0 0.00000
HETATM      2 Pt      2.20033    10.17187    14.95718    Pt    0 0 0.00000
HETATM      3 Pt      2.20033    18.54551    14.95718    Pt    0 0 0.00000
HETATM      4 Pt      9.45211    5.98505    14.95718    Pt    0 0 0.00000
HETATM      5 Pt      9.45211    14.35869    14.95718    Pt    0 0 0.00000
HETATM      6 Pt      9.45211    22.73233    14.95718    Pt    0 0 0.00000
HETATM      7 Pt     16.70390    10.17187    14.95718    Pt    0 0 0.00000
HETATM      8 Pt     16.70390    18.54551    14.95718    Pt    0 0 0.00000
HETATM      9 Pt     16.70390    26.91915    14.95718    Pt    0 0 0.00000
HETATM     10 Pt      2.20033    21.33672    14.95718    Pt    0 0 0.00000
HETATM     11 Pt      2.20033    4.58944    14.95718    Pt    0 0 0.00000
HETATM     12 Pt      2.20033    12.96308    14.95718    Pt    0 0 0.00000
HETATM     13 Pt      9.45211    25.52354    14.95718    Pt    0 0 0.00000
HETATM     14 Pt      9.45211    8.77626    14.95718    Pt    0 0 0.00000
HETATM     15 Pt      9.45211    17.14990    14.95718    Pt    0 0 0.00000
HETATM     16 Pt     16.70390    29.71036    14.95718    Pt    0 0 0.00000
HETATM     17 Pt     16.70390    12.96308    14.95718    Pt    0 0 0.00000
HETATM     18 Pt     16.70390    21.33672    14.95718    Pt    0 0 0.00000
HETATM     19 Pt      2.20033    24.12793    14.95718    Pt    0 0 0.00000
HETATM     20 Pt      2.20033    7.38065    14.95718    Pt    0 0 0.00000
HETATM     21 Pt      2.20033    15.75429    14.95718    Pt    0 0 0.00000
HETATM     22 Pt      9.45211    28.31475    14.95718    Pt    0 0 0.00000
HETATM     23 Pt      9.45211    11.56747    14.95718    Pt    0 0 0.00000
HETATM     24 Pt      9.45211    19.94111    14.95718    Pt    0 0 0.00000
HETATM     25 Pt     16.70390    32.50157    14.95718    Pt    0 0 0.00000
HETATM     26 Pt     16.70390    15.75429    14.95718    Pt    0 0 0.00000
HETATM     27 Pt     16.70390    24.12793    14.95718    Pt    0 0 0.00000
HETATM     28 Pt      4.61759    3.19384    14.95718    Pt    0 0 0.00000
HETATM     29 Pt      4.61759    11.56748    14.95718    Pt    0 0 0.00000
HETATM     30 Pt      4.61759    19.94112    14.95718    Pt    0 0 0.00000
HETATM     31 Pt     11.86937    7.38066    14.95718    Pt    0 0 0.00000
HETATM     32 Pt     11.86937    15.75430    14.95718    Pt    0 0 0.00000
HETATM     33 Pt     11.86937    24.12794    14.95718    Pt    0 0 0.00000
HETATM     34 Pt     19.12116    11.56748    14.95718    Pt    0 0 0.00000
HETATM     35 Pt     19.12116    19.94112    14.95718    Pt    0 0 0.00000
HETATM     36 Pt     19.12116    28.31476    14.95718    Pt    0 0 0.00000
HETATM     37 Pt      4.61759    22.73233    14.95718    Pt    0 0 0.00000
HETATM     38 Pt      4.61759    5.98505    14.95718    Pt    0 0 0.00000
HETATM     39 Pt      4.61759    14.35869    14.95718    Pt    0 0 0.00000
HETATM     40 Pt     11.86937    26.91915    14.95718    Pt    0 0 0.00000
HETATM     41 Pt     11.86937    10.17187    14.95718    Pt    0 0 0.00000
HETATM     42 Pt     11.86937    18.54551    14.95718    Pt    0 0 0.00000
HETATM     43 Pt     19.12116    31.10597    14.95718    Pt    0 0 0.00000
HETATM     44 Pt     19.12116    14.35869    14.95718    Pt    0 0 0.00000
HETATM     45 Pt     19.12116    22.73233    14.95718    Pt    0 0 0.00000
HETATM     46 Pt      4.61759    25.52354    14.95718    Pt    0 0 0.00000
HETATM     47 Pt      4.61759    8.77626    14.95718    Pt    0 0 0.00000
HETATM     48 Pt      4.61759    17.14990    14.95718    Pt    0 0 0.00000
HETATM     49 Pt     11.86937    29.71036    14.95718    Pt    0 0 0.00000
HETATM     50 Pt     11.86937    12.96308    14.95718    Pt    0 0 0.00000
HETATM     51 Pt     11.86937    21.33672    14.95718    Pt    0 0 0.00000
HETATM     52 Pt     19.12116    33.89718    14.95718    Pt    0 0 0.00000
HETATM     53 Pt     19.12116    17.14990    14.95718    Pt    0 0 0.00000
HETATM     54 Pt     19.12116    25.52354    14.95718    Pt    0 0 0.00000
HETATM     55 Pt      7.03485    4.58944    14.95718    Pt    0 0 0.00000
HETATM     56 Pt      7.03485    12.96308    14.95718    Pt    0 0 0.00000
HETATM     57 Pt      7.03485    21.33672    14.95718    Pt    0 0 0.00000

```

|        |     |    |          |          |          |    |   |   |         |
|--------|-----|----|----------|----------|----------|----|---|---|---------|
| HETATM | 58  | Pt | 14.28663 | 8.77626  | 14.95718 | Pt | 0 | 0 | 0.00000 |
| HETATM | 59  | Pt | 14.28663 | 17.14990 | 14.95718 | Pt | 0 | 0 | 0.00000 |
| HETATM | 60  | Pt | 14.28663 | 25.52354 | 14.95718 | Pt | 0 | 0 | 0.00000 |
| HETATM | 61  | Pt | 21.53842 | 12.96308 | 14.95718 | Pt | 0 | 0 | 0.00000 |
| HETATM | 62  | Pt | 21.53842 | 21.33672 | 14.95718 | Pt | 0 | 0 | 0.00000 |
| HETATM | 63  | Pt | 21.53842 | 29.71036 | 14.95718 | Pt | 0 | 0 | 0.00000 |
| HETATM | 64  | Pt | 7.03485  | 24.12793 | 14.95718 | Pt | 0 | 0 | 0.00000 |
| HETATM | 65  | Pt | 7.03485  | 7.38065  | 14.95718 | Pt | 0 | 0 | 0.00000 |
| HETATM | 66  | Pt | 7.03485  | 15.75429 | 14.95718 | Pt | 0 | 0 | 0.00000 |
| HETATM | 67  | Pt | 14.28663 | 28.31475 | 14.95718 | Pt | 0 | 0 | 0.00000 |
| HETATM | 68  | Pt | 14.28663 | 11.56747 | 14.95718 | Pt | 0 | 0 | 0.00000 |
| HETATM | 69  | Pt | 14.28663 | 19.94111 | 14.95718 | Pt | 0 | 0 | 0.00000 |
| HETATM | 70  | Pt | 21.53842 | 32.50157 | 14.95718 | Pt | 0 | 0 | 0.00000 |
| HETATM | 71  | Pt | 21.53842 | 15.75429 | 14.95718 | Pt | 0 | 0 | 0.00000 |
| HETATM | 72  | Pt | 21.53842 | 24.12793 | 14.95718 | Pt | 0 | 0 | 0.00000 |
| HETATM | 73  | Pt | 7.03485  | 26.91915 | 14.95718 | Pt | 0 | 0 | 0.00000 |
| HETATM | 74  | Pt | 7.03485  | 10.17187 | 14.95718 | Pt | 0 | 0 | 0.00000 |
| HETATM | 75  | Pt | 7.03485  | 18.54551 | 14.95718 | Pt | 0 | 0 | 0.00000 |
| HETATM | 76  | Pt | 14.28663 | 31.10597 | 14.95718 | Pt | 0 | 0 | 0.00000 |
| HETATM | 77  | Pt | 14.28663 | 14.35869 | 14.95718 | Pt | 0 | 0 | 0.00000 |
| HETATM | 78  | Pt | 14.28663 | 22.73233 | 14.95718 | Pt | 0 | 0 | 0.00000 |
| HETATM | 79  | Pt | 21.53842 | 35.29279 | 14.95718 | Pt | 0 | 0 | 0.00000 |
| HETATM | 80  | Pt | 21.53842 | 18.54551 | 14.95718 | Pt | 0 | 0 | 0.00000 |
| HETATM | 81  | Pt | 21.53842 | 26.91915 | 14.95718 | Pt | 0 | 0 | 0.00000 |
| HETATM | 82  | Pt | 3.00608  | 19.94112 | 17.23620 | Pt | 0 | 0 | 0.00000 |
| HETATM | 83  | Pt | 3.00608  | 3.19384  | 17.23620 | Pt | 0 | 0 | 0.00000 |
| HETATM | 84  | Pt | 3.00608  | 11.56748 | 17.23620 | Pt | 0 | 0 | 0.00000 |
| HETATM | 85  | Pt | 10.25786 | 24.12794 | 17.23620 | Pt | 0 | 0 | 0.00000 |
| HETATM | 86  | Pt | 10.25786 | 7.38066  | 17.23620 | Pt | 0 | 0 | 0.00000 |
| HETATM | 87  | Pt | 10.25786 | 15.75430 | 17.23620 | Pt | 0 | 0 | 0.00000 |
| HETATM | 88  | Pt | 17.50965 | 28.31476 | 17.23620 | Pt | 0 | 0 | 0.00000 |
| HETATM | 89  | Pt | 17.50965 | 11.56748 | 17.23620 | Pt | 0 | 0 | 0.00000 |
| HETATM | 90  | Pt | 17.50965 | 19.94112 | 17.23620 | Pt | 0 | 0 | 0.00000 |
| HETATM | 91  | Pt | 3.00608  | 22.73233 | 17.23620 | Pt | 0 | 0 | 0.00000 |
| HETATM | 92  | Pt | 3.00608  | 5.98505  | 17.23620 | Pt | 0 | 0 | 0.00000 |
| HETATM | 93  | Pt | 3.00608  | 14.35869 | 17.23620 | Pt | 0 | 0 | 0.00000 |
| HETATM | 94  | Pt | 10.25786 | 26.91915 | 17.23620 | Pt | 0 | 0 | 0.00000 |
| HETATM | 95  | Pt | 10.25786 | 10.17187 | 17.23620 | Pt | 0 | 0 | 0.00000 |
| HETATM | 96  | Pt | 10.25786 | 18.54551 | 17.23620 | Pt | 0 | 0 | 0.00000 |
| HETATM | 97  | Pt | 17.50965 | 31.10597 | 17.23620 | Pt | 0 | 0 | 0.00000 |
| HETATM | 98  | Pt | 17.50965 | 14.35869 | 17.23620 | Pt | 0 | 0 | 0.00000 |
| HETATM | 99  | Pt | 17.50965 | 22.73233 | 17.23620 | Pt | 0 | 0 | 0.00000 |
| HETATM | 100 | Pt | 3.00608  | 25.52354 | 17.23620 | Pt | 0 | 0 | 0.00000 |
| HETATM | 101 | Pt | 3.00608  | 8.77626  | 17.23620 | Pt | 0 | 0 | 0.00000 |
| HETATM | 102 | Pt | 3.00608  | 17.14990 | 17.23620 | Pt | 0 | 0 | 0.00000 |
| HETATM | 103 | Pt | 10.25786 | 29.71036 | 17.23620 | Pt | 0 | 0 | 0.00000 |
| HETATM | 104 | Pt | 10.25786 | 12.96308 | 17.23620 | Pt | 0 | 0 | 0.00000 |
| HETATM | 105 | Pt | 10.25786 | 21.33672 | 17.23620 | Pt | 0 | 0 | 0.00000 |
| HETATM | 106 | Pt | 17.50965 | 33.89718 | 17.23620 | Pt | 0 | 0 | 0.00000 |
| HETATM | 107 | Pt | 17.50965 | 17.14990 | 17.23620 | Pt | 0 | 0 | 0.00000 |
| HETATM | 108 | Pt | 17.50965 | 25.52354 | 17.23620 | Pt | 0 | 0 | 0.00000 |
| HETATM | 109 | Pt | 5.42334  | 21.33672 | 17.23620 | Pt | 0 | 0 | 0.00000 |
| HETATM | 110 | Pt | 5.42334  | 4.58944  | 17.23620 | Pt | 0 | 0 | 0.00000 |
| HETATM | 111 | Pt | 5.42334  | 12.96308 | 17.23620 | Pt | 0 | 0 | 0.00000 |
| HETATM | 112 | Pt | 12.67512 | 25.52354 | 17.23620 | Pt | 0 | 0 | 0.00000 |
| HETATM | 113 | Pt | 12.67512 | 8.77626  | 17.23620 | Pt | 0 | 0 | 0.00000 |
| HETATM | 114 | Pt | 12.67512 | 17.14990 | 17.23620 | Pt | 0 | 0 | 0.00000 |
| HETATM | 115 | Pt | 19.92691 | 29.71036 | 17.23620 | Pt | 0 | 0 | 0.00000 |
| HETATM | 116 | Pt | 19.92691 | 12.96308 | 17.23620 | Pt | 0 | 0 | 0.00000 |
| HETATM | 117 | Pt | 19.92691 | 21.33672 | 17.23620 | Pt | 0 | 0 | 0.00000 |
| HETATM | 118 | Pt | 5.42334  | 24.12793 | 17.23620 | Pt | 0 | 0 | 0.00000 |
| HETATM | 119 | Pt | 5.42334  | 7.38065  | 17.23620 | Pt | 0 | 0 | 0.00000 |
| HETATM | 120 | Pt | 5.42334  | 15.75429 | 17.23620 | Pt | 0 | 0 | 0.00000 |

|        |     |    |          |          |          |    |   |   |         |
|--------|-----|----|----------|----------|----------|----|---|---|---------|
| HETATM | 121 | Pt | 12.67512 | 28.31475 | 17.23620 | Pt | 0 | 0 | 0.00000 |
| HETATM | 122 | Pt | 12.67512 | 11.56747 | 17.23620 | Pt | 0 | 0 | 0.00000 |
| HETATM | 123 | Pt | 12.67512 | 19.94111 | 17.23620 | Pt | 0 | 0 | 0.00000 |
| HETATM | 124 | Pt | 19.92691 | 32.50157 | 17.23620 | Pt | 0 | 0 | 0.00000 |
| HETATM | 125 | Pt | 19.92691 | 15.75429 | 17.23620 | Pt | 0 | 0 | 0.00000 |
| HETATM | 126 | Pt | 19.92691 | 24.12793 | 17.23620 | Pt | 0 | 0 | 0.00000 |
| HETATM | 127 | Pt | 5.42334  | 26.91915 | 17.23620 | Pt | 0 | 0 | 0.00000 |
| HETATM | 128 | Pt | 5.42334  | 10.17187 | 17.23620 | Pt | 0 | 0 | 0.00000 |
| HETATM | 129 | Pt | 5.42334  | 18.54551 | 17.23620 | Pt | 0 | 0 | 0.00000 |
| HETATM | 130 | Pt | 12.67512 | 31.10597 | 17.23620 | Pt | 0 | 0 | 0.00000 |
| HETATM | 131 | Pt | 12.67512 | 14.35869 | 17.23620 | Pt | 0 | 0 | 0.00000 |
| HETATM | 132 | Pt | 12.67512 | 22.73233 | 17.23620 | Pt | 0 | 0 | 0.00000 |
| HETATM | 133 | Pt | 19.92691 | 35.29279 | 17.23620 | Pt | 0 | 0 | 0.00000 |
| HETATM | 134 | Pt | 19.92691 | 18.54551 | 17.23620 | Pt | 0 | 0 | 0.00000 |
| HETATM | 135 | Pt | 19.92691 | 26.91915 | 17.23620 | Pt | 0 | 0 | 0.00000 |
| HETATM | 136 | Pt | 7.84060  | 22.73233 | 17.23620 | Pt | 0 | 0 | 0.00000 |
| HETATM | 137 | Pt | 7.84060  | 5.98505  | 17.23620 | Pt | 0 | 0 | 0.00000 |
| HETATM | 138 | Pt | 7.84060  | 14.35869 | 17.23620 | Pt | 0 | 0 | 0.00000 |
| HETATM | 139 | Pt | 15.09238 | 26.91915 | 17.23620 | Pt | 0 | 0 | 0.00000 |
| HETATM | 140 | Pt | 15.09238 | 10.17187 | 17.23620 | Pt | 0 | 0 | 0.00000 |
| HETATM | 141 | Pt | 15.09238 | 18.54551 | 17.23620 | Pt | 0 | 0 | 0.00000 |
| HETATM | 142 | Pt | 0.58881  | 18.54551 | 17.23620 | Pt | 0 | 0 | 0.00000 |
| HETATM | 143 | Pt | 0.58881  | 1.79823  | 17.23620 | Pt | 0 | 0 | 0.00000 |
| HETATM | 144 | Pt | 0.58881  | 10.17187 | 17.23620 | Pt | 0 | 0 | 0.00000 |
| HETATM | 145 | Pt | 7.84060  | 25.52354 | 17.23620 | Pt | 0 | 0 | 0.00000 |
| HETATM | 146 | Pt | 7.84060  | 8.77626  | 17.23620 | Pt | 0 | 0 | 0.00000 |
| HETATM | 147 | Pt | 7.84060  | 17.14990 | 17.23620 | Pt | 0 | 0 | 0.00000 |
| HETATM | 148 | Pt | 15.09238 | 29.71036 | 17.23620 | Pt | 0 | 0 | 0.00000 |
| HETATM | 149 | Pt | 15.09238 | 12.96308 | 17.23620 | Pt | 0 | 0 | 0.00000 |
| HETATM | 150 | Pt | 15.09238 | 21.33672 | 17.23620 | Pt | 0 | 0 | 0.00000 |
| HETATM | 151 | Pt | 0.58881  | 21.33672 | 17.23620 | Pt | 0 | 0 | 0.00000 |
| HETATM | 152 | Pt | 0.58881  | 4.58944  | 17.23620 | Pt | 0 | 0 | 0.00000 |
| HETATM | 153 | Pt | 0.58881  | 12.96308 | 17.23620 | Pt | 0 | 0 | 0.00000 |
| HETATM | 154 | Pt | 7.84060  | 28.31475 | 17.23620 | Pt | 0 | 0 | 0.00000 |
| HETATM | 155 | Pt | 7.84060  | 11.56747 | 17.23620 | Pt | 0 | 0 | 0.00000 |
| HETATM | 156 | Pt | 7.84060  | 19.94111 | 17.23620 | Pt | 0 | 0 | 0.00000 |
| HETATM | 157 | Pt | 15.09238 | 32.50157 | 17.23620 | Pt | 0 | 0 | 0.00000 |
| HETATM | 158 | Pt | 15.09238 | 15.75429 | 17.23620 | Pt | 0 | 0 | 0.00000 |
| HETATM | 159 | Pt | 15.09238 | 24.12793 | 17.23620 | Pt | 0 | 0 | 0.00000 |
| HETATM | 160 | Pt | 0.58881  | 24.12793 | 17.23620 | Pt | 0 | 0 | 0.00000 |
| HETATM | 161 | Pt | 0.58881  | 7.38065  | 17.23620 | Pt | 0 | 0 | 0.00000 |
| HETATM | 162 | Pt | 0.58881  | 15.75429 | 17.23620 | Pt | 0 | 0 | 0.00000 |
| HETATM | 163 | Pt | 3.81181  | 21.33668 | 19.51480 | Pt | 0 | 0 | 0.00000 |
| HETATM | 164 | Pt | 3.81181  | 4.58940  | 19.51480 | Pt | 0 | 0 | 0.00000 |
| HETATM | 165 | Pt | 3.81181  | 12.96304 | 19.51480 | Pt | 0 | 0 | 0.00000 |
| HETATM | 166 | Pt | 11.06359 | 25.52350 | 19.51480 | Pt | 0 | 0 | 0.00000 |
| HETATM | 167 | Pt | 11.06359 | 8.77622  | 19.51481 | Pt | 0 | 0 | 0.00000 |
| HETATM | 168 | Pt | 11.06359 | 17.14986 | 19.51480 | Pt | 0 | 0 | 0.00000 |
| HETATM | 169 | Pt | 18.31538 | 29.71032 | 19.51481 | Pt | 0 | 0 | 0.00000 |
| HETATM | 170 | Pt | 18.31538 | 12.96304 | 19.51481 | Pt | 0 | 0 | 0.00000 |
| HETATM | 171 | Pt | 18.31538 | 21.33668 | 19.51481 | Pt | 0 | 0 | 0.00000 |
| HETATM | 172 | Pt | 3.81188  | 24.12794 | 19.51480 | Pt | 0 | 0 | 0.00000 |
| HETATM | 173 | Pt | 3.81188  | 7.38066  | 19.51480 | Pt | 0 | 0 | 0.00000 |
| HETATM | 174 | Pt | 3.81188  | 15.75430 | 19.51480 | Pt | 0 | 0 | 0.00000 |
| HETATM | 175 | Pt | 11.06367 | 28.31476 | 19.51480 | Pt | 0 | 0 | 0.00000 |
| HETATM | 176 | Pt | 11.06366 | 11.56748 | 19.51481 | Pt | 0 | 0 | 0.00000 |
| HETATM | 177 | Pt | 11.06366 | 19.94112 | 19.51480 | Pt | 0 | 0 | 0.00000 |
| HETATM | 178 | Pt | 18.31545 | 32.50158 | 19.51481 | Pt | 0 | 0 | 0.00000 |
| HETATM | 179 | Pt | 18.31545 | 15.75430 | 19.51481 | Pt | 0 | 0 | 0.00000 |
| HETATM | 180 | Pt | 18.31545 | 24.12794 | 19.51481 | Pt | 0 | 0 | 0.00000 |
| HETATM | 181 | Pt | 3.81180  | 26.91919 | 19.51480 | Pt | 0 | 0 | 0.00000 |
| HETATM | 182 | Pt | 3.81181  | 10.17191 | 19.51480 | Pt | 0 | 0 | 0.00000 |
| HETATM | 183 | Pt | 3.81180  | 18.54555 | 19.51480 | Pt | 0 | 0 | 0.00000 |

|        |     |    |          |          |          |    |   |   |         |
|--------|-----|----|----------|----------|----------|----|---|---|---------|
| HETATM | 184 | Pt | 11.06359 | 31.10601 | 19.51480 | Pt | 0 | 0 | 0.00000 |
| HETATM | 185 | Pt | 11.06359 | 14.35873 | 19.51480 | Pt | 0 | 0 | 0.00000 |
| HETATM | 186 | Pt | 11.06359 | 22.73237 | 19.51480 | Pt | 0 | 0 | 0.00000 |
| HETATM | 187 | Pt | 18.31538 | 35.29283 | 19.51480 | Pt | 0 | 0 | 0.00000 |
| HETATM | 188 | Pt | 18.31537 | 18.54555 | 19.51480 | Pt | 0 | 0 | 0.00000 |
| HETATM | 189 | Pt | 18.31537 | 26.91919 | 19.51481 | Pt | 0 | 0 | 0.00000 |
| HETATM | 190 | Pt | 6.22907  | 22.73237 | 19.51480 | Pt | 0 | 0 | 0.00000 |
| HETATM | 191 | Pt | 6.22907  | 5.98509  | 19.51480 | Pt | 0 | 0 | 0.00000 |
| HETATM | 192 | Pt | 6.22907  | 14.35873 | 19.51480 | Pt | 0 | 0 | 0.00000 |
| HETATM | 193 | Pt | 13.48085 | 26.91919 | 19.51480 | Pt | 0 | 0 | 0.00000 |
| HETATM | 194 | Pt | 13.48085 | 10.17191 | 19.51481 | Pt | 0 | 0 | 0.00000 |
| HETATM | 195 | Pt | 13.48085 | 18.54555 | 19.51481 | Pt | 0 | 0 | 0.00000 |
| HETATM | 196 | Pt | 20.73264 | 31.10601 | 19.51481 | Pt | 0 | 0 | 0.00000 |
| HETATM | 197 | Pt | 20.73264 | 14.35873 | 19.51480 | Pt | 0 | 0 | 0.00000 |
| HETATM | 198 | Pt | 20.73264 | 22.73237 | 19.51481 | Pt | 0 | 0 | 0.00000 |
| HETATM | 199 | Pt | 6.22907  | 25.52350 | 19.51480 | Pt | 0 | 0 | 0.00000 |
| HETATM | 200 | Pt | 6.22907  | 8.77622  | 19.51480 | Pt | 0 | 0 | 0.00000 |
| HETATM | 201 | Pt | 6.22907  | 17.14986 | 19.51480 | Pt | 0 | 0 | 0.00000 |
| HETATM | 202 | Pt | 13.48085 | 29.71032 | 19.51480 | Pt | 0 | 0 | 0.00000 |
| HETATM | 203 | Pt | 13.48085 | 12.96304 | 19.51480 | Pt | 0 | 0 | 0.00000 |
| HETATM | 204 | Pt | 13.48085 | 21.33668 | 19.51480 | Pt | 0 | 0 | 0.00000 |
| HETATM | 205 | Pt | 20.73264 | 33.89714 | 19.51480 | Pt | 0 | 0 | 0.00000 |
| HETATM | 206 | Pt | 20.73264 | 17.14986 | 19.51480 | Pt | 0 | 0 | 0.00000 |
| HETATM | 207 | Pt | 20.73264 | 25.52350 | 19.51481 | Pt | 0 | 0 | 0.00000 |
| HETATM | 208 | Pt | 6.22914  | 28.31476 | 19.51480 | Pt | 0 | 0 | 0.00000 |
| HETATM | 209 | Pt | 6.22914  | 11.56748 | 19.51480 | Pt | 0 | 0 | 0.00000 |
| HETATM | 210 | Pt | 6.22914  | 19.94111 | 19.51480 | Pt | 0 | 0 | 0.00000 |
| HETATM | 211 | Pt | 13.48093 | 32.50157 | 19.51480 | Pt | 0 | 0 | 0.00000 |
| HETATM | 212 | Pt | 13.48093 | 15.75430 | 19.51481 | Pt | 0 | 0 | 0.00000 |
| HETATM | 213 | Pt | 13.48093 | 24.12794 | 19.51480 | Pt | 0 | 0 | 0.00000 |
| HETATM | 214 | Pt | 20.73271 | 36.68840 | 19.51481 | Pt | 0 | 0 | 0.00000 |
| HETATM | 215 | Pt | 20.73271 | 19.94111 | 19.51481 | Pt | 0 | 0 | 0.00000 |
| HETATM | 216 | Pt | 20.73271 | 28.31476 | 19.51481 | Pt | 0 | 0 | 0.00000 |
| HETATM | 217 | Pt | 8.64640  | 24.12793 | 19.51480 | Pt | 0 | 0 | 0.00000 |
| HETATM | 218 | Pt | 8.64640  | 7.38066  | 19.51480 | Pt | 0 | 0 | 0.00000 |
| HETATM | 219 | Pt | 8.64640  | 15.75430 | 19.51480 | Pt | 0 | 0 | 0.00000 |
| HETATM | 220 | Pt | 15.89819 | 28.31476 | 19.51480 | Pt | 0 | 0 | 0.00000 |
| HETATM | 221 | Pt | 15.89819 | 11.56748 | 19.51480 | Pt | 0 | 0 | 0.00000 |
| HETATM | 222 | Pt | 15.89819 | 19.94112 | 19.51480 | Pt | 0 | 0 | 0.00000 |
| HETATM | 223 | Pt | 1.39461  | 19.94112 | 19.51481 | Pt | 0 | 0 | 0.00000 |
| HETATM | 224 | Pt | 1.39463  | 3.19384  | 19.51480 | Pt | 0 | 0 | 0.00000 |
| HETATM | 225 | Pt | 1.39463  | 11.56748 | 19.51481 | Pt | 0 | 0 | 0.00000 |
| HETATM | 226 | Pt | 8.64633  | 26.91919 | 19.51480 | Pt | 0 | 0 | 0.00000 |
| HETATM | 227 | Pt | 8.64633  | 10.17191 | 19.51480 | Pt | 0 | 0 | 0.00000 |
| HETATM | 228 | Pt | 8.64633  | 18.54555 | 19.51480 | Pt | 0 | 0 | 0.00000 |
| HETATM | 229 | Pt | 15.89811 | 31.10601 | 19.51480 | Pt | 0 | 0 | 0.00000 |
| HETATM | 230 | Pt | 15.89811 | 14.35873 | 19.51481 | Pt | 0 | 0 | 0.00000 |
| HETATM | 231 | Pt | 15.89811 | 22.73237 | 19.51480 | Pt | 0 | 0 | 0.00000 |
| HETATM | 232 | Pt | 1.39455  | 22.73237 | 19.51480 | Pt | 0 | 0 | 0.00000 |
| HETATM | 233 | Pt | 1.39455  | 5.98509  | 19.51480 | Pt | 0 | 0 | 0.00000 |
| HETATM | 234 | Pt | 1.39455  | 14.35873 | 19.51481 | Pt | 0 | 0 | 0.00000 |
| HETATM | 235 | Pt | 8.64633  | 29.71032 | 19.51480 | Pt | 0 | 0 | 0.00000 |
| HETATM | 236 | Pt | 8.64633  | 12.96304 | 19.51480 | Pt | 0 | 0 | 0.00000 |
| HETATM | 237 | Pt | 8.64633  | 21.33668 | 19.51480 | Pt | 0 | 0 | 0.00000 |
| HETATM | 238 | Pt | 15.89811 | 33.89714 | 19.51480 | Pt | 0 | 0 | 0.00000 |
| HETATM | 239 | Pt | 15.89811 | 17.14986 | 19.51480 | Pt | 0 | 0 | 0.00000 |
| HETATM | 240 | Pt | 15.89811 | 25.52350 | 19.51480 | Pt | 0 | 0 | 0.00000 |
| HETATM | 241 | Pt | 1.39455  | 25.52350 | 19.51480 | Pt | 0 | 0 | 0.00000 |
| HETATM | 242 | Pt | 1.39455  | 8.77622  | 19.51480 | Pt | 0 | 0 | 0.00000 |
| HETATM | 243 | Pt | 1.39455  | 17.14986 | 19.51480 | Pt | 0 | 0 | 0.00000 |
| HETATM | 244 | Pt | 2.20001  | 1.79770  | 21.79336 | Pt | 0 | 0 | 0.00000 |
| HETATM | 245 | Pt | 2.20002  | 10.17134 | 21.79336 | Pt | 0 | 0 | 0.00000 |
| HETATM | 246 | Pt | 2.20002  | 18.54498 | 21.79336 | Pt | 0 | 0 | 0.00000 |

|        |     |    |          |          |          |    |   |   |         |
|--------|-----|----|----------|----------|----------|----|---|---|---------|
| HETATM | 247 | Pt | 9.45180  | 5.98452  | 21.79335 | Pt | 0 | 0 | 0.00000 |
| HETATM | 248 | Pt | 9.45180  | 14.35816 | 21.79336 | Pt | 0 | 0 | 0.00000 |
| HETATM | 249 | Pt | 9.45180  | 22.73180 | 21.79335 | Pt | 0 | 0 | 0.00000 |
| HETATM | 250 | Pt | 16.70359 | 10.17134 | 21.79336 | Pt | 0 | 0 | 0.00000 |
| HETATM | 251 | Pt | 16.70359 | 18.54498 | 21.79336 | Pt | 0 | 0 | 0.00000 |
| HETATM | 252 | Pt | 16.70358 | 26.91862 | 21.79336 | Pt | 0 | 0 | 0.00000 |
| HETATM | 253 | Pt | 2.20001  | 21.33725 | 21.79336 | Pt | 0 | 0 | 0.00000 |
| HETATM | 254 | Pt | 2.20002  | 4.58997  | 21.79336 | Pt | 0 | 0 | 0.00000 |
| HETATM | 255 | Pt | 2.20002  | 12.96361 | 21.79336 | Pt | 0 | 0 | 0.00000 |
| HETATM | 256 | Pt | 9.45180  | 25.52407 | 21.79335 | Pt | 0 | 0 | 0.00000 |
| HETATM | 257 | Pt | 9.45180  | 8.77679  | 21.79336 | Pt | 0 | 0 | 0.00000 |
| HETATM | 258 | Pt | 9.45180  | 17.15043 | 21.79336 | Pt | 0 | 0 | 0.00000 |
| HETATM | 259 | Pt | 16.70359 | 29.71089 | 21.79336 | Pt | 0 | 0 | 0.00000 |
| HETATM | 260 | Pt | 16.70359 | 12.96361 | 21.79336 | Pt | 0 | 0 | 0.00000 |
| HETATM | 261 | Pt | 16.70358 | 21.33725 | 21.79336 | Pt | 0 | 0 | 0.00000 |
| HETATM | 262 | Pt | 2.20093  | 24.12794 | 21.79336 | Pt | 0 | 0 | 0.00000 |
| HETATM | 263 | Pt | 2.20093  | 7.38065  | 21.79336 | Pt | 0 | 0 | 0.00000 |
| HETATM | 264 | Pt | 2.20093  | 15.75430 | 21.79336 | Pt | 0 | 0 | 0.00000 |
| HETATM | 265 | Pt | 9.45272  | 28.31476 | 21.79335 | Pt | 0 | 0 | 0.00000 |
| HETATM | 266 | Pt | 9.45271  | 11.56748 | 21.79336 | Pt | 0 | 0 | 0.00000 |
| HETATM | 267 | Pt | 9.45272  | 19.94111 | 21.79336 | Pt | 0 | 0 | 0.00000 |
| HETATM | 268 | Pt | 16.70450 | 32.50157 | 21.79336 | Pt | 0 | 0 | 0.00000 |
| HETATM | 269 | Pt | 16.70450 | 15.75430 | 21.79336 | Pt | 0 | 0 | 0.00000 |
| HETATM | 270 | Pt | 16.70450 | 24.12794 | 21.79336 | Pt | 0 | 0 | 0.00000 |
| HETATM | 271 | Pt | 4.61819  | 3.19384  | 21.79336 | Pt | 0 | 0 | 0.00000 |
| HETATM | 272 | Pt | 4.61820  | 11.56748 | 21.79336 | Pt | 0 | 0 | 0.00000 |
| HETATM | 273 | Pt | 4.61819  | 19.94111 | 21.79335 | Pt | 0 | 0 | 0.00000 |
| HETATM | 274 | Pt | 11.86998 | 7.38065  | 21.79336 | Pt | 0 | 0 | 0.00000 |
| HETATM | 275 | Pt | 11.86998 | 15.75430 | 21.79336 | Pt | 0 | 0 | 0.00000 |
| HETATM | 276 | Pt | 11.86998 | 24.12794 | 21.79336 | Pt | 0 | 0 | 0.00000 |
| HETATM | 277 | Pt | 19.12177 | 11.56748 | 21.79336 | Pt | 0 | 0 | 0.00000 |
| HETATM | 278 | Pt | 19.12176 | 19.94111 | 21.79336 | Pt | 0 | 0 | 0.00000 |
| HETATM | 279 | Pt | 19.12176 | 28.31476 | 21.79336 | Pt | 0 | 0 | 0.00000 |
| HETATM | 280 | Pt | 4.61728  | 22.73180 | 21.79336 | Pt | 0 | 0 | 0.00000 |
| HETATM | 281 | Pt | 4.61728  | 5.98452  | 21.79336 | Pt | 0 | 0 | 0.00000 |
| HETATM | 282 | Pt | 4.61728  | 14.35816 | 21.79336 | Pt | 0 | 0 | 0.00000 |
| HETATM | 283 | Pt | 11.86907 | 26.91862 | 21.79336 | Pt | 0 | 0 | 0.00000 |
| HETATM | 284 | Pt | 11.86906 | 10.17134 | 21.79336 | Pt | 0 | 0 | 0.00000 |
| HETATM | 285 | Pt | 11.86906 | 18.54498 | 21.79336 | Pt | 0 | 0 | 0.00000 |
| HETATM | 286 | Pt | 19.12085 | 31.10544 | 21.79336 | Pt | 0 | 0 | 0.00000 |
| HETATM | 287 | Pt | 19.12085 | 14.35816 | 21.79336 | Pt | 0 | 0 | 0.00000 |
| HETATM | 288 | Pt | 19.12085 | 22.73180 | 21.79336 | Pt | 0 | 0 | 0.00000 |
| HETATM | 289 | Pt | 4.61727  | 25.52407 | 21.79336 | Pt | 0 | 0 | 0.00000 |
| HETATM | 290 | Pt | 4.61728  | 8.77679  | 21.79336 | Pt | 0 | 0 | 0.00000 |
| HETATM | 291 | Pt | 4.61728  | 17.15043 | 21.79335 | Pt | 0 | 0 | 0.00000 |
| HETATM | 292 | Pt | 11.86907 | 29.71089 | 21.79336 | Pt | 0 | 0 | 0.00000 |
| HETATM | 293 | Pt | 11.86906 | 12.96361 | 21.79336 | Pt | 0 | 0 | 0.00000 |
| HETATM | 294 | Pt | 11.86906 | 21.33725 | 21.79336 | Pt | 0 | 0 | 0.00000 |
| HETATM | 295 | Pt | 19.12085 | 33.89771 | 21.79336 | Pt | 0 | 0 | 0.00000 |
| HETATM | 296 | Pt | 19.12085 | 17.15043 | 21.79336 | Pt | 0 | 0 | 0.00000 |
| HETATM | 297 | Pt | 19.12084 | 25.52407 | 21.79336 | Pt | 0 | 0 | 0.00000 |
| HETATM | 298 | Pt | 7.03454  | 4.58997  | 21.79336 | Pt | 0 | 0 | 0.00000 |
| HETATM | 299 | Pt | 7.03454  | 12.96361 | 21.79336 | Pt | 0 | 0 | 0.00000 |
| HETATM | 300 | Pt | 7.03454  | 21.33725 | 21.79335 | Pt | 0 | 0 | 0.00000 |
| HETATM | 301 | Pt | 14.28633 | 8.77679  | 21.79336 | Pt | 0 | 0 | 0.00000 |
| HETATM | 302 | Pt | 14.28632 | 17.15043 | 21.79336 | Pt | 0 | 0 | 0.00000 |
| HETATM | 303 | Pt | 14.28633 | 25.52407 | 21.79336 | Pt | 0 | 0 | 0.00000 |
| HETATM | 304 | Pt | 21.53811 | 12.96361 | 21.79336 | Pt | 0 | 0 | 0.00000 |
| HETATM | 305 | Pt | 21.53811 | 21.33725 | 21.79336 | Pt | 0 | 0 | 0.00000 |
| HETATM | 306 | Pt | 21.53811 | 29.71089 | 21.79336 | Pt | 0 | 0 | 0.00000 |
| HETATM | 307 | Pt | 7.03546  | 24.12794 | 21.79335 | Pt | 0 | 0 | 0.00000 |
| HETATM | 308 | Pt | 7.03545  | 7.38066  | 21.79336 | Pt | 0 | 0 | 0.00000 |
| HETATM | 309 | Pt | 7.03546  | 15.75430 | 21.79335 | Pt | 0 | 0 | 0.00000 |

|        |     |    |          |          |          |    |   |   |         |
|--------|-----|----|----------|----------|----------|----|---|---|---------|
| HETATM | 310 | Pt | 14.28724 | 28.31476 | 21.79336 | Pt | 0 | 0 | 0.00000 |
| HETATM | 311 | Pt | 14.28724 | 11.56748 | 21.79336 | Pt | 0 | 0 | 0.00000 |
| HETATM | 312 | Pt | 14.28724 | 19.94112 | 21.79336 | Pt | 0 | 0 | 0.00000 |
| HETATM | 313 | Pt | 21.53903 | 32.50158 | 21.79336 | Pt | 0 | 0 | 0.00000 |
| HETATM | 314 | Pt | 21.53903 | 15.75430 | 21.79336 | Pt | 0 | 0 | 0.00000 |
| HETATM | 315 | Pt | 21.53903 | 24.12794 | 21.79336 | Pt | 0 | 0 | 0.00000 |
| HETATM | 316 | Pt | 7.03454  | 26.91862 | 21.79335 | Pt | 0 | 0 | 0.00000 |
| HETATM | 317 | Pt | 7.03454  | 10.17134 | 21.79336 | Pt | 0 | 0 | 0.00000 |
| HETATM | 318 | Pt | 7.03454  | 18.54498 | 21.79335 | Pt | 0 | 0 | 0.00000 |
| HETATM | 319 | Pt | 14.28633 | 31.10544 | 21.79336 | Pt | 0 | 0 | 0.00000 |
| HETATM | 320 | Pt | 14.28632 | 14.35816 | 21.79336 | Pt | 0 | 0 | 0.00000 |
| HETATM | 321 | Pt | 14.28632 | 22.73180 | 21.79336 | Pt | 0 | 0 | 0.00000 |
| HETATM | 322 | Pt | 21.53811 | 35.29226 | 21.79336 | Pt | 0 | 0 | 0.00000 |
| HETATM | 323 | Pt | 21.53811 | 18.54498 | 21.79336 | Pt | 0 | 0 | 0.00000 |
| HETATM | 324 | Pt | 21.53811 | 26.91862 | 21.79336 | Pt | 0 | 0 | 0.00000 |
| HETATM | 325 | Pt | 3.00608  | 19.94112 | 24.06777 | Pt | 0 | 0 | 0.00000 |
| HETATM | 326 | Pt | 3.00608  | 3.19384  | 24.06777 | Pt | 0 | 0 | 0.00000 |
| HETATM | 327 | Pt | 3.00607  | 11.56748 | 24.06777 | Pt | 0 | 0 | 0.00000 |
| HETATM | 328 | Pt | 10.25786 | 24.12794 | 24.06777 | Pt | 0 | 0 | 0.00000 |
| HETATM | 329 | Pt | 10.25786 | 7.38066  | 24.06777 | Pt | 0 | 0 | 0.00000 |
| HETATM | 330 | Pt | 10.25786 | 15.75430 | 24.06777 | Pt | 0 | 0 | 0.00000 |
| HETATM | 331 | Pt | 17.50964 | 28.31476 | 24.06777 | Pt | 0 | 0 | 0.00000 |
| HETATM | 332 | Pt | 17.50964 | 11.56748 | 24.06777 | Pt | 0 | 0 | 0.00000 |
| HETATM | 333 | Pt | 17.50965 | 19.94112 | 24.06777 | Pt | 0 | 0 | 0.00000 |
| HETATM | 334 | Pt | 3.00608  | 22.73233 | 24.07407 | Pt | 0 | 0 | 0.00000 |
| HETATM | 335 | Pt | 3.00607  | 5.98505  | 24.07407 | Pt | 0 | 0 | 0.00000 |
| HETATM | 336 | Pt | 3.00608  | 14.35869 | 24.07407 | Pt | 0 | 0 | 0.00000 |
| HETATM | 337 | Pt | 10.25786 | 26.91915 | 24.07407 | Pt | 0 | 0 | 0.00000 |
| HETATM | 338 | Pt | 10.25786 | 10.17187 | 24.07407 | Pt | 0 | 0 | 0.00000 |
| HETATM | 339 | Pt | 10.25786 | 18.54551 | 24.07407 | Pt | 0 | 0 | 0.00000 |
| HETATM | 340 | Pt | 17.50964 | 31.10597 | 24.07407 | Pt | 0 | 0 | 0.00000 |
| HETATM | 341 | Pt | 17.50964 | 14.35869 | 24.07407 | Pt | 0 | 0 | 0.00000 |
| HETATM | 342 | Pt | 17.50965 | 22.73233 | 24.07407 | Pt | 0 | 0 | 0.00000 |
| HETATM | 343 | Pt | 3.00608  | 25.52354 | 24.07407 | Pt | 0 | 0 | 0.00000 |
| HETATM | 344 | Pt | 3.00607  | 8.77626  | 24.07407 | Pt | 0 | 0 | 0.00000 |
| HETATM | 345 | Pt | 3.00608  | 17.14990 | 24.07407 | Pt | 0 | 0 | 0.00000 |
| HETATM | 346 | Pt | 10.25786 | 29.71036 | 24.07407 | Pt | 0 | 0 | 0.00000 |
| HETATM | 347 | Pt | 10.25786 | 12.96308 | 24.07407 | Pt | 0 | 0 | 0.00000 |
| HETATM | 348 | Pt | 10.25786 | 21.33672 | 24.07407 | Pt | 0 | 0 | 0.00000 |
| HETATM | 349 | Pt | 17.50964 | 33.89718 | 24.07407 | Pt | 0 | 0 | 0.00000 |
| HETATM | 350 | Pt | 17.50965 | 17.14990 | 24.07407 | Pt | 0 | 0 | 0.00000 |
| HETATM | 351 | Pt | 17.50965 | 25.52354 | 24.07407 | Pt | 0 | 0 | 0.00000 |
| HETATM | 352 | Pt | 5.42334  | 21.33672 | 24.07407 | Pt | 0 | 0 | 0.00000 |
| HETATM | 353 | Pt | 5.42334  | 4.58944  | 24.07407 | Pt | 0 | 0 | 0.00000 |
| HETATM | 354 | Pt | 5.42334  | 12.96308 | 24.07407 | Pt | 0 | 0 | 0.00000 |
| HETATM | 355 | Pt | 12.67512 | 25.52354 | 24.07407 | Pt | 0 | 0 | 0.00000 |
| HETATM | 356 | Pt | 12.67512 | 8.77626  | 24.07407 | Pt | 0 | 0 | 0.00000 |
| HETATM | 357 | Pt | 12.67512 | 17.14990 | 24.07407 | Pt | 0 | 0 | 0.00000 |
| HETATM | 358 | Pt | 19.92691 | 29.71036 | 24.07407 | Pt | 0 | 0 | 0.00000 |
| HETATM | 359 | Pt | 19.92691 | 12.96308 | 24.07407 | Pt | 0 | 0 | 0.00000 |
| HETATM | 360 | Pt | 19.92691 | 21.33672 | 24.07407 | Pt | 0 | 0 | 0.00000 |
| HETATM | 361 | Pt | 5.42334  | 24.12794 | 24.06777 | Pt | 0 | 0 | 0.00000 |
| HETATM | 362 | Pt | 5.42334  | 7.38066  | 24.06777 | Pt | 0 | 0 | 0.00000 |
| HETATM | 363 | Pt | 5.42334  | 15.75430 | 24.06777 | Pt | 0 | 0 | 0.00000 |
| HETATM | 364 | Pt | 12.67512 | 28.31476 | 24.06777 | Pt | 0 | 0 | 0.00000 |
| HETATM | 365 | Pt | 12.67512 | 11.56748 | 24.06777 | Pt | 0 | 0 | 0.00000 |
| HETATM | 366 | Pt | 12.67512 | 19.94112 | 24.06777 | Pt | 0 | 0 | 0.00000 |
| HETATM | 367 | Pt | 19.92691 | 32.50158 | 24.06777 | Pt | 0 | 0 | 0.00000 |
| HETATM | 368 | Pt | 19.92691 | 15.75430 | 24.06777 | Pt | 0 | 0 | 0.00000 |
| HETATM | 369 | Pt | 19.92691 | 24.12794 | 24.06777 | Pt | 0 | 0 | 0.00000 |
| HETATM | 370 | Pt | 5.42334  | 26.91915 | 24.07407 | Pt | 0 | 0 | 0.00000 |
| HETATM | 371 | Pt | 5.42334  | 10.17187 | 24.07407 | Pt | 0 | 0 | 0.00000 |
| HETATM | 372 | Pt | 5.42334  | 18.54551 | 24.07407 | Pt | 0 | 0 | 0.00000 |

|        |     |    |          |          |          |    |   |   |         |
|--------|-----|----|----------|----------|----------|----|---|---|---------|
| HETATM | 373 | Pt | 12.67512 | 31.10597 | 24.07407 | Pt | 0 | 0 | 0.00000 |
| HETATM | 374 | Pt | 12.67512 | 14.35869 | 24.07407 | Pt | 0 | 0 | 0.00000 |
| HETATM | 375 | Pt | 12.67512 | 22.73233 | 24.07407 | Pt | 0 | 0 | 0.00000 |
| HETATM | 376 | Pt | 19.92691 | 35.29279 | 24.07407 | Pt | 0 | 0 | 0.00000 |
| HETATM | 377 | Pt | 19.92691 | 18.54551 | 24.07407 | Pt | 0 | 0 | 0.00000 |
| HETATM | 378 | Pt | 19.92691 | 26.91915 | 24.07407 | Pt | 0 | 0 | 0.00000 |
| HETATM | 379 | Pt | 7.84060  | 22.73233 | 24.07407 | Pt | 0 | 0 | 0.00000 |
| HETATM | 380 | Pt | 7.84060  | 5.98505  | 24.07407 | Pt | 0 | 0 | 0.00000 |
| HETATM | 381 | Pt | 7.84060  | 14.35869 | 24.07407 | Pt | 0 | 0 | 0.00000 |
| HETATM | 382 | Pt | 15.09238 | 26.91915 | 24.07407 | Pt | 0 | 0 | 0.00000 |
| HETATM | 383 | Pt | 15.09238 | 10.17187 | 24.07407 | Pt | 0 | 0 | 0.00000 |
| HETATM | 384 | Pt | 15.09238 | 18.54551 | 24.07407 | Pt | 0 | 0 | 0.00000 |
| HETATM | 385 | Pt | 0.58881  | 18.54551 | 24.07407 | Pt | 0 | 0 | 0.00000 |
| HETATM | 386 | Pt | 0.58881  | 1.79823  | 24.07407 | Pt | 0 | 0 | 0.00000 |
| HETATM | 387 | Pt | 0.58881  | 10.17187 | 24.07407 | Pt | 0 | 0 | 0.00000 |
| HETATM | 388 | Pt | 7.84060  | 25.52354 | 24.07407 | Pt | 0 | 0 | 0.00000 |
| HETATM | 389 | Pt | 7.84060  | 8.77626  | 24.07407 | Pt | 0 | 0 | 0.00000 |
| HETATM | 390 | Pt | 7.84060  | 17.14990 | 24.07407 | Pt | 0 | 0 | 0.00000 |
| HETATM | 391 | Pt | 15.09238 | 29.71036 | 24.07407 | Pt | 0 | 0 | 0.00000 |
| HETATM | 392 | Pt | 15.09238 | 12.96308 | 24.07407 | Pt | 0 | 0 | 0.00000 |
| HETATM | 393 | Pt | 15.09238 | 21.33672 | 24.07407 | Pt | 0 | 0 | 0.00000 |
| HETATM | 394 | Pt | 0.58881  | 21.33672 | 24.07407 | Pt | 0 | 0 | 0.00000 |
| HETATM | 395 | Pt | 0.58881  | 4.58944  | 24.07407 | Pt | 0 | 0 | 0.00000 |
| HETATM | 396 | Pt | 0.58881  | 12.96308 | 24.07407 | Pt | 0 | 0 | 0.00000 |
| HETATM | 397 | Pt | 7.84060  | 28.31476 | 24.06777 | Pt | 0 | 0 | 0.00000 |
| HETATM | 398 | Pt | 7.84060  | 11.56748 | 24.06777 | Pt | 0 | 0 | 0.00000 |
| HETATM | 399 | Pt | 7.84060  | 19.94112 | 24.06777 | Pt | 0 | 0 | 0.00000 |
| HETATM | 400 | Pt | 15.09238 | 32.50158 | 24.06777 | Pt | 0 | 0 | 0.00000 |
| HETATM | 401 | Pt | 15.09238 | 15.75430 | 24.06777 | Pt | 0 | 0 | 0.00000 |
| HETATM | 402 | Pt | 15.09238 | 24.12794 | 24.06777 | Pt | 0 | 0 | 0.00000 |
| HETATM | 403 | Pt | 0.58881  | 24.12794 | 24.06777 | Pt | 0 | 0 | 0.00000 |
| HETATM | 404 | Pt | 0.58881  | 7.38066  | 24.06777 | Pt | 0 | 0 | 0.00000 |
| HETATM | 405 | Pt | 0.58881  | 15.75430 | 24.06777 | Pt | 0 | 0 | 0.00000 |
| HETATM | 406 | Pt | 3.80690  | 21.32818 | 26.35091 | Pt | 0 | 0 | 0.00000 |
| HETATM | 407 | Pt | 3.80690  | 4.58090  | 26.35091 | Pt | 0 | 0 | 0.00000 |
| HETATM | 408 | Pt | 3.80690  | 12.95454 | 26.35091 | Pt | 0 | 0 | 0.00000 |
| HETATM | 409 | Pt | 11.05867 | 25.51500 | 26.35091 | Pt | 0 | 0 | 0.00000 |
| HETATM | 410 | Pt | 11.05868 | 8.76772  | 26.35091 | Pt | 0 | 0 | 0.00000 |
| HETATM | 411 | Pt | 11.05868 | 17.14136 | 26.35091 | Pt | 0 | 0 | 0.00000 |
| HETATM | 412 | Pt | 18.31047 | 29.70182 | 26.35090 | Pt | 0 | 0 | 0.00000 |
| HETATM | 413 | Pt | 18.31046 | 12.95454 | 26.35091 | Pt | 0 | 0 | 0.00000 |
| HETATM | 414 | Pt | 18.31047 | 21.32818 | 26.35090 | Pt | 0 | 0 | 0.00000 |
| HETATM | 415 | Pt | 3.82170  | 24.12794 | 26.35091 | Pt | 0 | 0 | 0.00000 |
| HETATM | 416 | Pt | 3.82169  | 7.38066  | 26.35091 | Pt | 0 | 0 | 0.00000 |
| HETATM | 417 | Pt | 3.82170  | 15.75430 | 26.35091 | Pt | 0 | 0 | 0.00000 |
| HETATM | 418 | Pt | 11.07348 | 28.31476 | 26.35091 | Pt | 0 | 0 | 0.00000 |
| HETATM | 419 | Pt | 11.07348 | 11.56748 | 26.35091 | Pt | 0 | 0 | 0.00000 |
| HETATM | 420 | Pt | 11.07347 | 19.94112 | 26.35091 | Pt | 0 | 0 | 0.00000 |
| HETATM | 421 | Pt | 18.32526 | 32.50158 | 26.35090 | Pt | 0 | 0 | 0.00000 |
| HETATM | 422 | Pt | 18.32527 | 15.75430 | 26.35091 | Pt | 0 | 0 | 0.00000 |
| HETATM | 423 | Pt | 18.32527 | 24.12794 | 26.35090 | Pt | 0 | 0 | 0.00000 |
| HETATM | 424 | Pt | 3.80690  | 26.92769 | 26.35091 | Pt | 0 | 0 | 0.00000 |
| HETATM | 425 | Pt | 3.80689  | 10.18041 | 26.35091 | Pt | 0 | 0 | 0.00000 |
| HETATM | 426 | Pt | 3.80690  | 18.55405 | 26.35091 | Pt | 0 | 0 | 0.00000 |
| HETATM | 427 | Pt | 11.05868 | 31.11451 | 26.35091 | Pt | 0 | 0 | 0.00000 |
| HETATM | 428 | Pt | 11.05868 | 14.36723 | 26.35091 | Pt | 0 | 0 | 0.00000 |
| HETATM | 429 | Pt | 11.05867 | 22.74087 | 26.35091 | Pt | 0 | 0 | 0.00000 |
| HETATM | 430 | Pt | 18.31046 | 35.30134 | 26.35090 | Pt | 0 | 0 | 0.00000 |
| HETATM | 431 | Pt | 18.31047 | 18.55405 | 26.35091 | Pt | 0 | 0 | 0.00000 |
| HETATM | 432 | Pt | 18.31047 | 26.92769 | 26.35090 | Pt | 0 | 0 | 0.00000 |
| HETATM | 433 | Pt | 6.22416  | 22.74087 | 26.35091 | Pt | 0 | 0 | 0.00000 |
| HETATM | 434 | Pt | 6.22416  | 5.99359  | 26.35091 | Pt | 0 | 0 | 0.00000 |
| HETATM | 435 | Pt | 6.22416  | 14.36724 | 26.35091 | Pt | 0 | 0 | 0.00000 |

|        |     |    |          |          |          |    |   |   |         |
|--------|-----|----|----------|----------|----------|----|---|---|---------|
| HETATM | 436 | Pt | 13.47594 | 26.92769 | 26.35091 | Pt | 0 | 0 | 0.00000 |
| HETATM | 437 | Pt | 13.47594 | 10.18041 | 26.35091 | Pt | 0 | 0 | 0.00000 |
| HETATM | 438 | Pt | 13.47594 | 18.55405 | 26.35090 | Pt | 0 | 0 | 0.00000 |
| HETATM | 439 | Pt | 20.72773 | 31.11451 | 26.35090 | Pt | 0 | 0 | 0.00000 |
| HETATM | 440 | Pt | 20.72773 | 14.36724 | 26.35090 | Pt | 0 | 0 | 0.00000 |
| HETATM | 441 | Pt | 20.72773 | 22.74087 | 26.35091 | Pt | 0 | 0 | 0.00000 |
| HETATM | 442 | Pt | 6.22416  | 25.51500 | 26.35091 | Pt | 0 | 0 | 0.00000 |
| HETATM | 443 | Pt | 6.22416  | 8.76772  | 26.35091 | Pt | 0 | 0 | 0.00000 |
| HETATM | 444 | Pt | 6.22416  | 17.14136 | 26.35091 | Pt | 0 | 0 | 0.00000 |
| HETATM | 445 | Pt | 13.47594 | 29.70182 | 26.35091 | Pt | 0 | 0 | 0.00000 |
| HETATM | 446 | Pt | 13.47594 | 12.95454 | 26.35091 | Pt | 0 | 0 | 0.00000 |
| HETATM | 447 | Pt | 13.47594 | 21.32818 | 26.35090 | Pt | 0 | 0 | 0.00000 |
| HETATM | 448 | Pt | 20.72773 | 33.88864 | 26.35090 | Pt | 0 | 0 | 0.00000 |
| HETATM | 449 | Pt | 20.72773 | 17.14136 | 26.35091 | Pt | 0 | 0 | 0.00000 |
| HETATM | 450 | Pt | 20.72773 | 25.51500 | 26.35090 | Pt | 0 | 0 | 0.00000 |
| HETATM | 451 | Pt | 6.23896  | 28.31475 | 26.35091 | Pt | 0 | 0 | 0.00000 |
| HETATM | 452 | Pt | 6.23895  | 11.56748 | 26.35091 | Pt | 0 | 0 | 0.00000 |
| HETATM | 453 | Pt | 6.23896  | 19.94112 | 26.35091 | Pt | 0 | 0 | 0.00000 |
| HETATM | 454 | Pt | 13.49074 | 32.50158 | 26.35091 | Pt | 0 | 0 | 0.00000 |
| HETATM | 455 | Pt | 13.49074 | 15.75429 | 26.35090 | Pt | 0 | 0 | 0.00000 |
| HETATM | 456 | Pt | 13.49074 | 24.12794 | 26.35090 | Pt | 0 | 0 | 0.00000 |
| HETATM | 457 | Pt | 20.74253 | 36.68840 | 26.35090 | Pt | 0 | 0 | 0.00000 |
| HETATM | 458 | Pt | 20.74253 | 19.94112 | 26.35091 | Pt | 0 | 0 | 0.00000 |
| HETATM | 459 | Pt | 20.74253 | 28.31475 | 26.35090 | Pt | 0 | 0 | 0.00000 |
| HETATM | 460 | Pt | 8.65622  | 24.12794 | 26.35091 | Pt | 0 | 0 | 0.00000 |
| HETATM | 461 | Pt | 8.65622  | 7.38066  | 26.35091 | Pt | 0 | 0 | 0.00000 |
| HETATM | 462 | Pt | 8.65622  | 15.75430 | 26.35091 | Pt | 0 | 0 | 0.00000 |
| HETATM | 463 | Pt | 15.90800 | 28.31476 | 26.35090 | Pt | 0 | 0 | 0.00000 |
| HETATM | 464 | Pt | 15.90800 | 11.56748 | 26.35091 | Pt | 0 | 0 | 0.00000 |
| HETATM | 465 | Pt | 15.90800 | 19.94112 | 26.35090 | Pt | 0 | 0 | 0.00000 |
| HETATM | 466 | Pt | 1.40444  | 19.94112 | 26.35090 | Pt | 0 | 0 | 0.00000 |
| HETATM | 467 | Pt | 1.40444  | 3.19384  | 26.35091 | Pt | 0 | 0 | 0.00000 |
| HETATM | 468 | Pt | 1.40444  | 11.56748 | 26.35091 | Pt | 0 | 0 | 0.00000 |
| HETATM | 469 | Pt | 8.64142  | 26.92769 | 26.35091 | Pt | 0 | 0 | 0.00000 |
| HETATM | 470 | Pt | 8.64142  | 10.18041 | 26.35091 | Pt | 0 | 0 | 0.00000 |
| HETATM | 471 | Pt | 8.64142  | 18.55405 | 26.35091 | Pt | 0 | 0 | 0.00000 |
| HETATM | 472 | Pt | 15.89320 | 31.11451 | 26.35090 | Pt | 0 | 0 | 0.00000 |
| HETATM | 473 | Pt | 15.89320 | 14.36723 | 26.35090 | Pt | 0 | 0 | 0.00000 |
| HETATM | 474 | Pt | 15.89321 | 22.74087 | 26.35090 | Pt | 0 | 0 | 0.00000 |
| HETATM | 475 | Pt | 1.38965  | 22.74087 | 26.35091 | Pt | 0 | 0 | 0.00000 |
| HETATM | 476 | Pt | 1.38964  | 5.99360  | 26.35091 | Pt | 0 | 0 | 0.00000 |
| HETATM | 477 | Pt | 1.38964  | 14.36723 | 26.35091 | Pt | 0 | 0 | 0.00000 |
| HETATM | 478 | Pt | 8.64142  | 29.70182 | 26.35091 | Pt | 0 | 0 | 0.00000 |
| HETATM | 479 | Pt | 8.64142  | 12.95454 | 26.35091 | Pt | 0 | 0 | 0.00000 |
| HETATM | 480 | Pt | 8.64141  | 21.32818 | 26.35091 | Pt | 0 | 0 | 0.00000 |
| HETATM | 481 | Pt | 15.89320 | 33.88864 | 26.35091 | Pt | 0 | 0 | 0.00000 |
| HETATM | 482 | Pt | 15.89321 | 17.14136 | 26.35090 | Pt | 0 | 0 | 0.00000 |
| HETATM | 483 | Pt | 15.89320 | 25.51500 | 26.35090 | Pt | 0 | 0 | 0.00000 |
| HETATM | 484 | Pt | 1.38964  | 25.51500 | 26.35090 | Pt | 0 | 0 | 0.00000 |
| HETATM | 485 | Pt | 1.38964  | 8.76772  | 26.35091 | Pt | 0 | 0 | 0.00000 |
| HETATM | 486 | Pt | 1.38965  | 17.14136 | 26.35090 | Pt | 0 | 0 | 0.00000 |
| HETATM | 487 | Pt | 2.20957  | 1.81428  | 28.71197 | Pt | 0 | 0 | 0.00000 |
| HETATM | 488 | Pt | 2.20958  | 10.18793 | 28.71201 | Pt | 0 | 0 | 0.00000 |
| HETATM | 489 | Pt | 2.20956  | 18.56157 | 28.71200 | Pt | 0 | 0 | 0.00000 |
| HETATM | 490 | Pt | 9.46138  | 6.00111  | 28.71201 | Pt | 0 | 0 | 0.00000 |
| HETATM | 491 | Pt | 9.46138  | 14.37474 | 28.71198 | Pt | 0 | 0 | 0.00000 |
| HETATM | 492 | Pt | 9.46140  | 22.74838 | 28.71202 | Pt | 0 | 0 | 0.00000 |
| HETATM | 493 | Pt | 16.71318 | 10.18792 | 28.71201 | Pt | 0 | 0 | 0.00000 |
| HETATM | 494 | Pt | 16.71316 | 18.56158 | 28.71200 | Pt | 0 | 0 | 0.00000 |
| HETATM | 495 | Pt | 16.71316 | 26.93520 | 28.71198 | Pt | 0 | 0 | 0.00000 |
| HETATM | 496 | Pt | 2.20955  | 21.32068 | 28.71200 | Pt | 0 | 0 | 0.00000 |
| HETATM | 497 | Pt | 2.20958  | 4.57339  | 28.71198 | Pt | 0 | 0 | 0.00000 |
| HETATM | 498 | Pt | 2.20959  | 12.94702 | 28.71200 | Pt | 0 | 0 | 0.00000 |



|        |     |    |          |          |          |    |   |   |         |
|--------|-----|----|----------|----------|----------|----|---|---|---------|
| HETATM | 499 | Pt | 9.46140  | 25.50748 | 28.71201 | Pt | 0 | 0 | 0.00000 |
| HETATM | 500 | Pt | 9.46137  | 8.76022  | 28.71201 | Pt | 0 | 0 | 0.00000 |
| HETATM | 501 | Pt | 9.46139  | 17.13385 | 28.71199 | Pt | 0 | 0 | 0.00000 |
| HETATM | 502 | Pt | 16.71317 | 29.69431 | 28.71198 | Pt | 0 | 0 | 0.00000 |
| HETATM | 503 | Pt | 16.71318 | 12.94701 | 28.71200 | Pt | 0 | 0 | 0.00000 |
| HETATM | 504 | Pt | 16.71315 | 21.32068 | 28.71200 | Pt | 0 | 0 | 0.00000 |
| HETATM | 505 | Pt | 2.18177  | 24.12793 | 28.71200 | Pt | 0 | 0 | 0.00000 |
| HETATM | 506 | Pt | 2.18179  | 7.38065  | 28.71201 | Pt | 0 | 0 | 0.00000 |
| HETATM | 507 | Pt | 2.18174  | 15.75430 | 28.71201 | Pt | 0 | 0 | 0.00000 |
| HETATM | 508 | Pt | 9.43355  | 28.31476 | 28.71200 | Pt | 0 | 0 | 0.00000 |
| HETATM | 509 | Pt | 9.43358  | 11.56748 | 28.71199 | Pt | 0 | 0 | 0.00000 |
| HETATM | 510 | Pt | 9.43360  | 19.94111 | 28.71200 | Pt | 0 | 0 | 0.00000 |
| HETATM | 511 | Pt | 16.68539 | 32.50157 | 28.71199 | Pt | 0 | 0 | 0.00000 |
| HETATM | 512 | Pt | 16.68533 | 15.75430 | 28.71199 | Pt | 0 | 0 | 0.00000 |
| HETATM | 513 | Pt | 16.68536 | 24.12794 | 28.71198 | Pt | 0 | 0 | 0.00000 |
| HETATM | 514 | Pt | 4.59905  | 3.19384  | 28.71201 | Pt | 0 | 0 | 0.00000 |
| HETATM | 515 | Pt | 4.59905  | 11.56747 | 28.71201 | Pt | 0 | 0 | 0.00000 |
| HETATM | 516 | Pt | 4.59900  | 19.94111 | 28.71201 | Pt | 0 | 0 | 0.00000 |
| HETATM | 517 | Pt | 11.85082 | 7.38066  | 28.71199 | Pt | 0 | 0 | 0.00000 |
| HETATM | 518 | Pt | 11.85086 | 15.75430 | 28.71199 | Pt | 0 | 0 | 0.00000 |
| HETATM | 519 | Pt | 11.85086 | 24.12793 | 28.71199 | Pt | 0 | 0 | 0.00000 |
| HETATM | 520 | Pt | 19.10263 | 11.56747 | 28.71200 | Pt | 0 | 0 | 0.00000 |
| HETATM | 521 | Pt | 19.10258 | 19.94112 | 28.71200 | Pt | 0 | 0 | 0.00000 |
| HETATM | 522 | Pt | 19.10262 | 28.31477 | 28.71200 | Pt | 0 | 0 | 0.00000 |
| HETATM | 523 | Pt | 4.62683  | 22.74838 | 28.71200 | Pt | 0 | 0 | 0.00000 |
| HETATM | 524 | Pt | 4.62684  | 6.00110  | 28.71198 | Pt | 0 | 0 | 0.00000 |
| HETATM | 525 | Pt | 4.62684  | 14.37474 | 28.71201 | Pt | 0 | 0 | 0.00000 |
| HETATM | 526 | Pt | 11.87866 | 26.93521 | 28.71201 | Pt | 0 | 0 | 0.00000 |
| HETATM | 527 | Pt | 11.87864 | 10.18793 | 28.71201 | Pt | 0 | 0 | 0.00000 |
| HETATM | 528 | Pt | 11.87866 | 18.56156 | 28.71199 | Pt | 0 | 0 | 0.00000 |
| HETATM | 529 | Pt | 19.13042 | 31.12202 | 28.71198 | Pt | 0 | 0 | 0.00000 |
| HETATM | 530 | Pt | 19.13042 | 14.37475 | 28.71200 | Pt | 0 | 0 | 0.00000 |
| HETATM | 531 | Pt | 19.13041 | 22.74839 | 28.71200 | Pt | 0 | 0 | 0.00000 |
| HETATM | 532 | Pt | 4.62682  | 25.50750 | 28.71200 | Pt | 0 | 0 | 0.00000 |
| HETATM | 533 | Pt | 4.62685  | 8.76021  | 28.71199 | Pt | 0 | 0 | 0.00000 |
| HETATM | 534 | Pt | 4.62684  | 17.13384 | 28.71200 | Pt | 0 | 0 | 0.00000 |
| HETATM | 535 | Pt | 11.87866 | 29.69430 | 28.71201 | Pt | 0 | 0 | 0.00000 |
| HETATM | 536 | Pt | 11.87864 | 12.94704 | 28.71201 | Pt | 0 | 0 | 0.00000 |
| HETATM | 537 | Pt | 11.87867 | 21.32067 | 28.71199 | Pt | 0 | 0 | 0.00000 |
| HETATM | 538 | Pt | 19.13043 | 33.88112 | 28.71198 | Pt | 0 | 0 | 0.00000 |
| HETATM | 539 | Pt | 19.13042 | 17.13384 | 28.71200 | Pt | 0 | 0 | 0.00000 |
| HETATM | 540 | Pt | 19.13040 | 25.50750 | 28.71200 | Pt | 0 | 0 | 0.00000 |
| HETATM | 541 | Pt | 7.04410  | 4.57341  | 28.71201 | Pt | 0 | 0 | 0.00000 |
| HETATM | 542 | Pt | 7.04411  | 12.94703 | 28.71199 | Pt | 0 | 0 | 0.00000 |
| HETATM | 543 | Pt | 7.04411  | 21.32066 | 28.71200 | Pt | 0 | 0 | 0.00000 |
| HETATM | 544 | Pt | 14.29592 | 8.76020  | 28.71200 | Pt | 0 | 0 | 0.00000 |
| HETATM | 545 | Pt | 14.29591 | 17.13387 | 28.71201 | Pt | 0 | 0 | 0.00000 |
| HETATM | 546 | Pt | 14.29592 | 25.50748 | 28.71199 | Pt | 0 | 0 | 0.00000 |
| HETATM | 547 | Pt | 21.54767 | 12.94702 | 28.71198 | Pt | 0 | 0 | 0.00000 |
| HETATM | 548 | Pt | 21.54767 | 21.32066 | 28.71199 | Pt | 0 | 0 | 0.00000 |
| HETATM | 549 | Pt | 21.54766 | 29.69433 | 28.71200 | Pt | 0 | 0 | 0.00000 |
| HETATM | 550 | Pt | 7.01629  | 24.12794 | 28.71201 | Pt | 0 | 0 | 0.00000 |
| HETATM | 551 | Pt | 7.01631  | 7.38066  | 28.71199 | Pt | 0 | 0 | 0.00000 |
| HETATM | 552 | Pt | 7.01631  | 15.75429 | 28.71201 | Pt | 0 | 0 | 0.00000 |
| HETATM | 553 | Pt | 14.26812 | 28.31475 | 28.71199 | Pt | 0 | 0 | 0.00000 |
| HETATM | 554 | Pt | 14.26809 | 11.56748 | 28.71199 | Pt | 0 | 0 | 0.00000 |
| HETATM | 555 | Pt | 14.26811 | 19.94112 | 28.71198 | Pt | 0 | 0 | 0.00000 |
| HETATM | 556 | Pt | 21.51987 | 32.50158 | 28.71200 | Pt | 0 | 0 | 0.00000 |
| HETATM | 557 | Pt | 21.51987 | 15.75429 | 28.71201 | Pt | 0 | 0 | 0.00000 |
| HETATM | 558 | Pt | 21.51985 | 24.12795 | 28.71201 | Pt | 0 | 0 | 0.00000 |
| HETATM | 559 | Pt | 7.04411  | 26.93522 | 28.71201 | Pt | 0 | 0 | 0.00000 |
| HETATM | 560 | Pt | 7.04410  | 10.18791 | 28.71199 | Pt | 0 | 0 | 0.00000 |
| HETATM | 561 | Pt | 7.04411  | 18.56156 | 28.71200 | Pt | 0 | 0 | 0.00000 |

|        |     |    |          |          |          |    |   |   |         |
|--------|-----|----|----------|----------|----------|----|---|---|---------|
| HETATM | 562 | Pt | 14.29592 | 31.12202 | 28.71200 | Pt | 0 | 0 | 0.00000 |
| HETATM | 563 | Pt | 14.29592 | 14.37476 | 28.71201 | Pt | 0 | 0 | 0.00000 |
| HETATM | 564 | Pt | 14.29591 | 22.74837 | 28.71198 | Pt | 0 | 0 | 0.00000 |
| HETATM | 565 | Pt | 21.54766 | 35.30883 | 28.71198 | Pt | 0 | 0 | 0.00000 |
| HETATM | 566 | Pt | 21.54767 | 18.56157 | 28.71199 | Pt | 0 | 0 | 0.00000 |
| HETATM | 567 | Pt | 21.54767 | 26.93523 | 28.71201 | Pt | 0 | 0 | 0.00000 |
| HETATM | 568 | O  | 3.00619  | 19.94110 | 29.83367 | O  | 0 | 0 | 0.00000 |
| HETATM | 569 | O  | 3.00608  | 3.19384  | 29.83370 | O  | 0 | 0 | 0.00000 |
| HETATM | 570 | O  | 3.00606  | 11.56749 | 29.83367 | O  | 0 | 0 | 0.00000 |
| HETATM | 571 | O  | 10.25779 | 24.12797 | 29.83366 | O  | 0 | 0 | 0.00000 |
| HETATM | 572 | O  | 10.25791 | 7.38063  | 29.83366 | O  | 0 | 0 | 0.00000 |
| HETATM | 573 | O  | 10.25781 | 15.75430 | 29.83370 | O  | 0 | 0 | 0.00000 |
| HETATM | 574 | O  | 17.50960 | 28.31476 | 29.83371 | O  | 0 | 0 | 0.00000 |
| HETATM | 575 | O  | 17.50959 | 11.56751 | 29.83368 | O  | 0 | 0 | 0.00000 |
| HETATM | 576 | O  | 17.50971 | 19.94109 | 29.83367 | O  | 0 | 0 | 0.00000 |
| HETATM | 577 | O  | 5.42341  | 24.12792 | 29.83366 | O  | 0 | 0 | 0.00000 |
| HETATM | 578 | O  | 5.42332  | 7.38066  | 29.83369 | O  | 0 | 0 | 0.00000 |
| HETATM | 579 | O  | 5.42334  | 15.75432 | 29.83367 | O  | 0 | 0 | 0.00000 |
| HETATM | 580 | O  | 12.67506 | 28.31477 | 29.83368 | O  | 0 | 0 | 0.00000 |
| HETATM | 581 | O  | 12.67514 | 11.56745 | 29.83367 | O  | 0 | 0 | 0.00000 |
| HETATM | 582 | O  | 12.67506 | 19.94113 | 29.83369 | O  | 0 | 0 | 0.00000 |
| HETATM | 583 | O  | 19.92688 | 32.50159 | 29.83371 | O  | 0 | 0 | 0.00000 |
| HETATM | 584 | O  | 19.92690 | 15.75432 | 29.83368 | O  | 0 | 0 | 0.00000 |
| HETATM | 585 | O  | 19.92696 | 24.12790 | 29.83367 | O  | 0 | 0 | 0.00000 |
| HETATM | 586 | O  | 7.84064  | 28.31471 | 29.83365 | O  | 0 | 0 | 0.00000 |
| HETATM | 587 | O  | 7.84060  | 11.56751 | 29.83370 | O  | 0 | 0 | 0.00000 |
| HETATM | 588 | O  | 7.84055  | 19.94113 | 29.83368 | O  | 0 | 0 | 0.00000 |
| HETATM | 589 | O  | 15.09230 | 32.50159 | 29.83369 | O  | 0 | 0 | 0.00000 |
| HETATM | 590 | O  | 15.09241 | 15.75425 | 29.83366 | O  | 0 | 0 | 0.00000 |
| HETATM | 591 | O  | 15.09235 | 24.12797 | 29.83371 | O  | 0 | 0 | 0.00000 |
| HETATM | 592 | O  | 0.58885  | 24.12799 | 29.83371 | O  | 0 | 0 | 0.00000 |
| HETATM | 593 | O  | 0.58880  | 7.38066  | 29.83369 | O  | 0 | 0 | 0.00000 |
| HETATM | 594 | O  | 0.58889  | 15.75424 | 29.83366 | O  | 0 | 0 | 0.00000 |

UNIT ENERGY kcal  
ENERGY -75144.008783  
END

XTLGRF 200

DESCRP TS

REMARK Pt111\_0.33ML\_9x9x7\_30.0\_vac hcp-displacement

FIXATOMS 1 162

CRYSTX 25.12092 25.12092 43.67409 90.00000 90.00000 60.00000

FORMAT ATOM (a6,1x,i5,1x,a5,1x,a3,1x,a1,1x,a5,3f10.5,1x,a5,i3,i2,1x,f8.5)

|        |    |    |          |          |          |    |   |   |         |
|--------|----|----|----------|----------|----------|----|---|---|---------|
| HETATM | 1  | Pt | 2.20033  | 1.79823  | 14.95718 | Pt | 0 | 0 | 0.00000 |
| HETATM | 2  | Pt | 2.20033  | 10.17187 | 14.95718 | Pt | 0 | 0 | 0.00000 |
| HETATM | 3  | Pt | 2.20033  | 18.54551 | 14.95718 | Pt | 0 | 0 | 0.00000 |
| HETATM | 4  | Pt | 9.45211  | 5.98505  | 14.95718 | Pt | 0 | 0 | 0.00000 |
| HETATM | 5  | Pt | 9.45211  | 14.35869 | 14.95718 | Pt | 0 | 0 | 0.00000 |
| HETATM | 6  | Pt | 9.45211  | 22.73233 | 14.95718 | Pt | 0 | 0 | 0.00000 |
| HETATM | 7  | Pt | 16.70390 | 10.17187 | 14.95718 | Pt | 0 | 0 | 0.00000 |
| HETATM | 8  | Pt | 16.70390 | 18.54551 | 14.95718 | Pt | 0 | 0 | 0.00000 |
| HETATM | 9  | Pt | 16.70390 | 26.91915 | 14.95718 | Pt | 0 | 0 | 0.00000 |
| HETATM | 10 | Pt | 2.20033  | 21.33672 | 14.95718 | Pt | 0 | 0 | 0.00000 |
| HETATM | 11 | Pt | 2.20033  | 4.58944  | 14.95718 | Pt | 0 | 0 | 0.00000 |
| HETATM | 12 | Pt | 2.20033  | 12.96308 | 14.95718 | Pt | 0 | 0 | 0.00000 |
| HETATM | 13 | Pt | 9.45211  | 25.52354 | 14.95718 | Pt | 0 | 0 | 0.00000 |
| HETATM | 14 | Pt | 9.45211  | 8.77626  | 14.95718 | Pt | 0 | 0 | 0.00000 |
| HETATM | 15 | Pt | 9.45211  | 17.14990 | 14.95718 | Pt | 0 | 0 | 0.00000 |
| HETATM | 16 | Pt | 16.70390 | 29.71036 | 14.95718 | Pt | 0 | 0 | 0.00000 |
| HETATM | 17 | Pt | 16.70390 | 12.96308 | 14.95718 | Pt | 0 | 0 | 0.00000 |
| HETATM | 18 | Pt | 16.70390 | 21.33672 | 14.95718 | Pt | 0 | 0 | 0.00000 |
| HETATM | 19 | Pt | 2.20033  | 24.12793 | 14.95718 | Pt | 0 | 0 | 0.00000 |
| HETATM | 20 | Pt | 2.20033  | 7.38065  | 14.95718 | Pt | 0 | 0 | 0.00000 |

|        |    |    |          |          |          |    |   |   |         |
|--------|----|----|----------|----------|----------|----|---|---|---------|
| HETATM | 21 | Pt | 2.20033  | 15.75429 | 14.95718 | Pt | 0 | 0 | 0.00000 |
| HETATM | 22 | Pt | 9.45211  | 28.31475 | 14.95718 | Pt | 0 | 0 | 0.00000 |
| HETATM | 23 | Pt | 9.45211  | 11.56747 | 14.95718 | Pt | 0 | 0 | 0.00000 |
| HETATM | 24 | Pt | 9.45211  | 19.94111 | 14.95718 | Pt | 0 | 0 | 0.00000 |
| HETATM | 25 | Pt | 16.70390 | 32.50157 | 14.95718 | Pt | 0 | 0 | 0.00000 |
| HETATM | 26 | Pt | 16.70390 | 15.75429 | 14.95718 | Pt | 0 | 0 | 0.00000 |
| HETATM | 27 | Pt | 16.70390 | 24.12793 | 14.95718 | Pt | 0 | 0 | 0.00000 |
| HETATM | 28 | Pt | 4.61759  | 3.19384  | 14.95718 | Pt | 0 | 0 | 0.00000 |
| HETATM | 29 | Pt | 4.61759  | 11.56748 | 14.95718 | Pt | 0 | 0 | 0.00000 |
| HETATM | 30 | Pt | 4.61759  | 19.94112 | 14.95718 | Pt | 0 | 0 | 0.00000 |
| HETATM | 31 | Pt | 11.86937 | 7.38066  | 14.95718 | Pt | 0 | 0 | 0.00000 |
| HETATM | 32 | Pt | 11.86937 | 15.75430 | 14.95718 | Pt | 0 | 0 | 0.00000 |
| HETATM | 33 | Pt | 11.86937 | 24.12794 | 14.95718 | Pt | 0 | 0 | 0.00000 |
| HETATM | 34 | Pt | 19.12116 | 11.56748 | 14.95718 | Pt | 0 | 0 | 0.00000 |
| HETATM | 35 | Pt | 19.12116 | 19.94112 | 14.95718 | Pt | 0 | 0 | 0.00000 |
| HETATM | 36 | Pt | 19.12116 | 28.31476 | 14.95718 | Pt | 0 | 0 | 0.00000 |
| HETATM | 37 | Pt | 4.61759  | 22.73233 | 14.95718 | Pt | 0 | 0 | 0.00000 |
| HETATM | 38 | Pt | 4.61759  | 5.98505  | 14.95718 | Pt | 0 | 0 | 0.00000 |
| HETATM | 39 | Pt | 4.61759  | 14.35869 | 14.95718 | Pt | 0 | 0 | 0.00000 |
| HETATM | 40 | Pt | 11.86937 | 26.91915 | 14.95718 | Pt | 0 | 0 | 0.00000 |
| HETATM | 41 | Pt | 11.86937 | 10.17187 | 14.95718 | Pt | 0 | 0 | 0.00000 |
| HETATM | 42 | Pt | 11.86937 | 18.54551 | 14.95718 | Pt | 0 | 0 | 0.00000 |
| HETATM | 43 | Pt | 19.12116 | 31.10597 | 14.95718 | Pt | 0 | 0 | 0.00000 |
| HETATM | 44 | Pt | 19.12116 | 14.35869 | 14.95718 | Pt | 0 | 0 | 0.00000 |
| HETATM | 45 | Pt | 19.12116 | 22.73233 | 14.95718 | Pt | 0 | 0 | 0.00000 |
| HETATM | 46 | Pt | 4.61759  | 25.52354 | 14.95718 | Pt | 0 | 0 | 0.00000 |
| HETATM | 47 | Pt | 4.61759  | 8.77626  | 14.95718 | Pt | 0 | 0 | 0.00000 |
| HETATM | 48 | Pt | 4.61759  | 17.14990 | 14.95718 | Pt | 0 | 0 | 0.00000 |
| HETATM | 49 | Pt | 11.86937 | 29.71036 | 14.95718 | Pt | 0 | 0 | 0.00000 |
| HETATM | 50 | Pt | 11.86937 | 12.96308 | 14.95718 | Pt | 0 | 0 | 0.00000 |
| HETATM | 51 | Pt | 11.86937 | 21.33672 | 14.95718 | Pt | 0 | 0 | 0.00000 |
| HETATM | 52 | Pt | 19.12116 | 33.89718 | 14.95718 | Pt | 0 | 0 | 0.00000 |
| HETATM | 53 | Pt | 19.12116 | 17.14990 | 14.95718 | Pt | 0 | 0 | 0.00000 |
| HETATM | 54 | Pt | 19.12116 | 25.52354 | 14.95718 | Pt | 0 | 0 | 0.00000 |
| HETATM | 55 | Pt | 7.03485  | 4.58944  | 14.95718 | Pt | 0 | 0 | 0.00000 |
| HETATM | 56 | Pt | 7.03485  | 12.96308 | 14.95718 | Pt | 0 | 0 | 0.00000 |
| HETATM | 57 | Pt | 7.03485  | 21.33672 | 14.95718 | Pt | 0 | 0 | 0.00000 |
| HETATM | 58 | Pt | 14.28663 | 8.77626  | 14.95718 | Pt | 0 | 0 | 0.00000 |
| HETATM | 59 | Pt | 14.28663 | 17.14990 | 14.95718 | Pt | 0 | 0 | 0.00000 |
| HETATM | 60 | Pt | 14.28663 | 25.52354 | 14.95718 | Pt | 0 | 0 | 0.00000 |
| HETATM | 61 | Pt | 21.53842 | 12.96308 | 14.95718 | Pt | 0 | 0 | 0.00000 |
| HETATM | 62 | Pt | 21.53842 | 21.33672 | 14.95718 | Pt | 0 | 0 | 0.00000 |
| HETATM | 63 | Pt | 21.53842 | 29.71036 | 14.95718 | Pt | 0 | 0 | 0.00000 |
| HETATM | 64 | Pt | 7.03485  | 24.12793 | 14.95718 | Pt | 0 | 0 | 0.00000 |
| HETATM | 65 | Pt | 7.03485  | 7.38065  | 14.95718 | Pt | 0 | 0 | 0.00000 |
| HETATM | 66 | Pt | 7.03485  | 15.75429 | 14.95718 | Pt | 0 | 0 | 0.00000 |
| HETATM | 67 | Pt | 14.28663 | 28.31475 | 14.95718 | Pt | 0 | 0 | 0.00000 |
| HETATM | 68 | Pt | 14.28663 | 11.56747 | 14.95718 | Pt | 0 | 0 | 0.00000 |
| HETATM | 69 | Pt | 14.28663 | 19.94111 | 14.95718 | Pt | 0 | 0 | 0.00000 |
| HETATM | 70 | Pt | 21.53842 | 32.50157 | 14.95718 | Pt | 0 | 0 | 0.00000 |
| HETATM | 71 | Pt | 21.53842 | 15.75429 | 14.95718 | Pt | 0 | 0 | 0.00000 |
| HETATM | 72 | Pt | 21.53842 | 24.12793 | 14.95718 | Pt | 0 | 0 | 0.00000 |
| HETATM | 73 | Pt | 7.03485  | 26.91915 | 14.95718 | Pt | 0 | 0 | 0.00000 |
| HETATM | 74 | Pt | 7.03485  | 10.17187 | 14.95718 | Pt | 0 | 0 | 0.00000 |
| HETATM | 75 | Pt | 7.03485  | 18.54551 | 14.95718 | Pt | 0 | 0 | 0.00000 |
| HETATM | 76 | Pt | 14.28663 | 31.10597 | 14.95718 | Pt | 0 | 0 | 0.00000 |
| HETATM | 77 | Pt | 14.28663 | 14.35869 | 14.95718 | Pt | 0 | 0 | 0.00000 |
| HETATM | 78 | Pt | 14.28663 | 22.73233 | 14.95718 | Pt | 0 | 0 | 0.00000 |
| HETATM | 79 | Pt | 21.53842 | 35.29279 | 14.95718 | Pt | 0 | 0 | 0.00000 |
| HETATM | 80 | Pt | 21.53842 | 18.54551 | 14.95718 | Pt | 0 | 0 | 0.00000 |
| HETATM | 81 | Pt | 21.53842 | 26.91915 | 14.95718 | Pt | 0 | 0 | 0.00000 |
| HETATM | 82 | Pt | 3.00608  | 19.94112 | 17.23620 | Pt | 0 | 0 | 0.00000 |
| HETATM | 83 | Pt | 3.00608  | 3.19384  | 17.23620 | Pt | 0 | 0 | 0.00000 |

|        |     |    |          |          |          |    |   |   |         |
|--------|-----|----|----------|----------|----------|----|---|---|---------|
| HETATM | 84  | Pt | 3.00608  | 11.56748 | 17.23620 | Pt | 0 | 0 | 0.00000 |
| HETATM | 85  | Pt | 10.25786 | 24.12794 | 17.23620 | Pt | 0 | 0 | 0.00000 |
| HETATM | 86  | Pt | 10.25786 | 7.38066  | 17.23620 | Pt | 0 | 0 | 0.00000 |
| HETATM | 87  | Pt | 10.25786 | 15.75430 | 17.23620 | Pt | 0 | 0 | 0.00000 |
| HETATM | 88  | Pt | 17.50965 | 28.31476 | 17.23620 | Pt | 0 | 0 | 0.00000 |
| HETATM | 89  | Pt | 17.50965 | 11.56748 | 17.23620 | Pt | 0 | 0 | 0.00000 |
| HETATM | 90  | Pt | 17.50965 | 19.94112 | 17.23620 | Pt | 0 | 0 | 0.00000 |
| HETATM | 91  | Pt | 3.00608  | 22.73233 | 17.23620 | Pt | 0 | 0 | 0.00000 |
| HETATM | 92  | Pt | 3.00608  | 5.98505  | 17.23620 | Pt | 0 | 0 | 0.00000 |
| HETATM | 93  | Pt | 3.00608  | 14.35869 | 17.23620 | Pt | 0 | 0 | 0.00000 |
| HETATM | 94  | Pt | 10.25786 | 26.91915 | 17.23620 | Pt | 0 | 0 | 0.00000 |
| HETATM | 95  | Pt | 10.25786 | 10.17187 | 17.23620 | Pt | 0 | 0 | 0.00000 |
| HETATM | 96  | Pt | 10.25786 | 18.54551 | 17.23620 | Pt | 0 | 0 | 0.00000 |
| HETATM | 97  | Pt | 17.50965 | 31.10597 | 17.23620 | Pt | 0 | 0 | 0.00000 |
| HETATM | 98  | Pt | 17.50965 | 14.35869 | 17.23620 | Pt | 0 | 0 | 0.00000 |
| HETATM | 99  | Pt | 17.50965 | 22.73233 | 17.23620 | Pt | 0 | 0 | 0.00000 |
| HETATM | 100 | Pt | 3.00608  | 25.52354 | 17.23620 | Pt | 0 | 0 | 0.00000 |
| HETATM | 101 | Pt | 3.00608  | 8.77626  | 17.23620 | Pt | 0 | 0 | 0.00000 |
| HETATM | 102 | Pt | 3.00608  | 17.14990 | 17.23620 | Pt | 0 | 0 | 0.00000 |
| HETATM | 103 | Pt | 10.25786 | 29.71036 | 17.23620 | Pt | 0 | 0 | 0.00000 |
| HETATM | 104 | Pt | 10.25786 | 12.96308 | 17.23620 | Pt | 0 | 0 | 0.00000 |
| HETATM | 105 | Pt | 10.25786 | 21.33672 | 17.23620 | Pt | 0 | 0 | 0.00000 |
| HETATM | 106 | Pt | 17.50965 | 33.89718 | 17.23620 | Pt | 0 | 0 | 0.00000 |
| HETATM | 107 | Pt | 17.50965 | 17.14990 | 17.23620 | Pt | 0 | 0 | 0.00000 |
| HETATM | 108 | Pt | 17.50965 | 25.52354 | 17.23620 | Pt | 0 | 0 | 0.00000 |
| HETATM | 109 | Pt | 5.42334  | 21.33672 | 17.23620 | Pt | 0 | 0 | 0.00000 |
| HETATM | 110 | Pt | 5.42334  | 4.58944  | 17.23620 | Pt | 0 | 0 | 0.00000 |
| HETATM | 111 | Pt | 5.42334  | 12.96308 | 17.23620 | Pt | 0 | 0 | 0.00000 |
| HETATM | 112 | Pt | 12.67512 | 25.52354 | 17.23620 | Pt | 0 | 0 | 0.00000 |
| HETATM | 113 | Pt | 12.67512 | 8.77626  | 17.23620 | Pt | 0 | 0 | 0.00000 |
| HETATM | 114 | Pt | 12.67512 | 17.14990 | 17.23620 | Pt | 0 | 0 | 0.00000 |
| HETATM | 115 | Pt | 19.92691 | 29.71036 | 17.23620 | Pt | 0 | 0 | 0.00000 |
| HETATM | 116 | Pt | 19.92691 | 12.96308 | 17.23620 | Pt | 0 | 0 | 0.00000 |
| HETATM | 117 | Pt | 19.92691 | 21.33672 | 17.23620 | Pt | 0 | 0 | 0.00000 |
| HETATM | 118 | Pt | 5.42334  | 24.12793 | 17.23620 | Pt | 0 | 0 | 0.00000 |
| HETATM | 119 | Pt | 5.42334  | 7.38065  | 17.23620 | Pt | 0 | 0 | 0.00000 |
| HETATM | 120 | Pt | 5.42334  | 15.75429 | 17.23620 | Pt | 0 | 0 | 0.00000 |
| HETATM | 121 | Pt | 12.67512 | 28.31475 | 17.23620 | Pt | 0 | 0 | 0.00000 |
| HETATM | 122 | Pt | 12.67512 | 11.56747 | 17.23620 | Pt | 0 | 0 | 0.00000 |
| HETATM | 123 | Pt | 12.67512 | 19.94111 | 17.23620 | Pt | 0 | 0 | 0.00000 |
| HETATM | 124 | Pt | 19.92691 | 32.50157 | 17.23620 | Pt | 0 | 0 | 0.00000 |
| HETATM | 125 | Pt | 19.92691 | 15.75429 | 17.23620 | Pt | 0 | 0 | 0.00000 |
| HETATM | 126 | Pt | 19.92691 | 24.12793 | 17.23620 | Pt | 0 | 0 | 0.00000 |
| HETATM | 127 | Pt | 5.42334  | 26.91915 | 17.23620 | Pt | 0 | 0 | 0.00000 |
| HETATM | 128 | Pt | 5.42334  | 10.17187 | 17.23620 | Pt | 0 | 0 | 0.00000 |
| HETATM | 129 | Pt | 5.42334  | 18.54551 | 17.23620 | Pt | 0 | 0 | 0.00000 |
| HETATM | 130 | Pt | 12.67512 | 31.10597 | 17.23620 | Pt | 0 | 0 | 0.00000 |
| HETATM | 131 | Pt | 12.67512 | 14.35869 | 17.23620 | Pt | 0 | 0 | 0.00000 |
| HETATM | 132 | Pt | 12.67512 | 22.73233 | 17.23620 | Pt | 0 | 0 | 0.00000 |
| HETATM | 133 | Pt | 19.92691 | 35.29279 | 17.23620 | Pt | 0 | 0 | 0.00000 |
| HETATM | 134 | Pt | 19.92691 | 18.54551 | 17.23620 | Pt | 0 | 0 | 0.00000 |
| HETATM | 135 | Pt | 19.92691 | 26.91915 | 17.23620 | Pt | 0 | 0 | 0.00000 |
| HETATM | 136 | Pt | 7.84060  | 22.73233 | 17.23620 | Pt | 0 | 0 | 0.00000 |
| HETATM | 137 | Pt | 7.84060  | 5.98505  | 17.23620 | Pt | 0 | 0 | 0.00000 |
| HETATM | 138 | Pt | 7.84060  | 14.35869 | 17.23620 | Pt | 0 | 0 | 0.00000 |
| HETATM | 139 | Pt | 15.09238 | 26.91915 | 17.23620 | Pt | 0 | 0 | 0.00000 |
| HETATM | 140 | Pt | 15.09238 | 10.17187 | 17.23620 | Pt | 0 | 0 | 0.00000 |
| HETATM | 141 | Pt | 15.09238 | 18.54551 | 17.23620 | Pt | 0 | 0 | 0.00000 |
| HETATM | 142 | Pt | 0.58881  | 18.54551 | 17.23620 | Pt | 0 | 0 | 0.00000 |
| HETATM | 143 | Pt | 0.58881  | 1.79823  | 17.23620 | Pt | 0 | 0 | 0.00000 |
| HETATM | 144 | Pt | 0.58881  | 10.17187 | 17.23620 | Pt | 0 | 0 | 0.00000 |
| HETATM | 145 | Pt | 7.84060  | 25.52354 | 17.23620 | Pt | 0 | 0 | 0.00000 |
| HETATM | 146 | Pt | 7.84060  | 8.77626  | 17.23620 | Pt | 0 | 0 | 0.00000 |

|        |     |    |          |          |          |    |   |   |         |
|--------|-----|----|----------|----------|----------|----|---|---|---------|
| HETATM | 147 | Pt | 7.84060  | 17.14990 | 17.23620 | Pt | 0 | 0 | 0.00000 |
| HETATM | 148 | Pt | 15.09238 | 29.71036 | 17.23620 | Pt | 0 | 0 | 0.00000 |
| HETATM | 149 | Pt | 15.09238 | 12.96308 | 17.23620 | Pt | 0 | 0 | 0.00000 |
| HETATM | 150 | Pt | 15.09238 | 21.33672 | 17.23620 | Pt | 0 | 0 | 0.00000 |
| HETATM | 151 | Pt | 0.58881  | 21.33672 | 17.23620 | Pt | 0 | 0 | 0.00000 |
| HETATM | 152 | Pt | 0.58881  | 4.58944  | 17.23620 | Pt | 0 | 0 | 0.00000 |
| HETATM | 153 | Pt | 0.58881  | 12.96308 | 17.23620 | Pt | 0 | 0 | 0.00000 |
| HETATM | 154 | Pt | 7.84060  | 28.31475 | 17.23620 | Pt | 0 | 0 | 0.00000 |
| HETATM | 155 | Pt | 7.84060  | 11.56747 | 17.23620 | Pt | 0 | 0 | 0.00000 |
| HETATM | 156 | Pt | 7.84060  | 19.94111 | 17.23620 | Pt | 0 | 0 | 0.00000 |
| HETATM | 157 | Pt | 15.09238 | 32.50157 | 17.23620 | Pt | 0 | 0 | 0.00000 |
| HETATM | 158 | Pt | 15.09238 | 15.75429 | 17.23620 | Pt | 0 | 0 | 0.00000 |
| HETATM | 159 | Pt | 15.09238 | 24.12793 | 17.23620 | Pt | 0 | 0 | 0.00000 |
| HETATM | 160 | Pt | 0.58881  | 24.12793 | 17.23620 | Pt | 0 | 0 | 0.00000 |
| HETATM | 161 | Pt | 0.58881  | 7.38065  | 17.23620 | Pt | 0 | 0 | 0.00000 |
| HETATM | 162 | Pt | 0.58881  | 15.75429 | 17.23620 | Pt | 0 | 0 | 0.00000 |
| HETATM | 163 | Pt | 3.81173  | 21.33655 | 19.51532 | Pt | 0 | 0 | 0.00000 |
| HETATM | 164 | Pt | 3.81192  | 4.58929  | 19.51542 | Pt | 0 | 0 | 0.00000 |
| HETATM | 165 | Pt | 3.81191  | 12.96303 | 19.51504 | Pt | 0 | 0 | 0.00000 |
| HETATM | 166 | Pt | 11.06344 | 25.52355 | 19.51542 | Pt | 0 | 0 | 0.00000 |
| HETATM | 167 | Pt | 11.06321 | 8.77556  | 19.51369 | Pt | 0 | 0 | 0.00000 |
| HETATM | 168 | Pt | 11.06326 | 17.15038 | 19.51420 | Pt | 0 | 0 | 0.00000 |
| HETATM | 169 | Pt | 18.31532 | 29.71040 | 19.51505 | Pt | 0 | 0 | 0.00000 |
| HETATM | 170 | Pt | 18.31599 | 12.96301 | 19.51420 | Pt | 0 | 0 | 0.00000 |
| HETATM | 171 | Pt | 18.31547 | 21.33684 | 19.51451 | Pt | 0 | 0 | 0.00000 |
| HETATM | 172 | Pt | 3.81186  | 24.12776 | 19.51536 | Pt | 0 | 0 | 0.00000 |
| HETATM | 173 | Pt | 3.81212  | 7.38063  | 19.51521 | Pt | 0 | 0 | 0.00000 |
| HETATM | 174 | Pt | 3.81190  | 15.75424 | 19.51514 | Pt | 0 | 0 | 0.00000 |
| HETATM | 175 | Pt | 11.06350 | 28.31457 | 19.51530 | Pt | 0 | 0 | 0.00000 |
| HETATM | 176 | Pt | 11.06321 | 11.56721 | 19.51336 | Pt | 0 | 0 | 0.00000 |
| HETATM | 177 | Pt | 11.06339 | 19.94165 | 19.51484 | Pt | 0 | 0 | 0.00000 |
| HETATM | 178 | Pt | 18.31544 | 32.50161 | 19.51532 | Pt | 0 | 0 | 0.00000 |
| HETATM | 179 | Pt | 18.31598 | 15.75437 | 19.51408 | Pt | 0 | 0 | 0.00000 |
| HETATM | 180 | Pt | 18.31542 | 24.12810 | 19.51477 | Pt | 0 | 0 | 0.00000 |
| HETATM | 181 | Pt | 3.81181  | 26.91901 | 19.51546 | Pt | 0 | 0 | 0.00000 |
| HETATM | 182 | Pt | 3.81202  | 10.17193 | 19.51506 | Pt | 0 | 0 | 0.00000 |
| HETATM | 183 | Pt | 3.81174  | 18.54545 | 19.51527 | Pt | 0 | 0 | 0.00000 |
| HETATM | 184 | Pt | 11.06325 | 31.10540 | 19.51456 | Pt | 0 | 0 | 0.00000 |
| HETATM | 185 | Pt | 11.06312 | 14.35898 | 19.51359 | Pt | 0 | 0 | 0.00000 |
| HETATM | 186 | Pt | 11.06339 | 22.73266 | 19.51530 | Pt | 0 | 0 | 0.00000 |
| HETATM | 187 | Pt | 18.31586 | 35.29279 | 19.51479 | Pt | 0 | 0 | 0.00000 |
| HETATM | 188 | Pt | 18.31565 | 18.54565 | 19.51432 | Pt | 0 | 0 | 0.00000 |
| HETATM | 189 | Pt | 18.31532 | 26.91931 | 19.51491 | Pt | 0 | 0 | 0.00000 |
| HETATM | 190 | Pt | 6.22892  | 22.73227 | 19.51536 | Pt | 0 | 0 | 0.00000 |
| HETATM | 191 | Pt | 6.22900  | 5.98485  | 19.51530 | Pt | 0 | 0 | 0.00000 |
| HETATM | 192 | Pt | 6.22910  | 14.35874 | 19.51532 | Pt | 0 | 0 | 0.00000 |
| HETATM | 193 | Pt | 13.48071 | 26.91939 | 19.51521 | Pt | 0 | 0 | 0.00000 |
| HETATM | 194 | Pt | 13.48084 | 10.17138 | 19.51336 | Pt | 0 | 0 | 0.00000 |
| HETATM | 195 | Pt | 13.48065 | 18.54605 | 19.51408 | Pt | 0 | 0 | 0.00000 |
| HETATM | 196 | Pt | 20.73258 | 31.10600 | 19.51514 | Pt | 0 | 0 | 0.00000 |
| HETATM | 197 | Pt | 20.73323 | 14.35876 | 19.51484 | Pt | 0 | 0 | 0.00000 |
| HETATM | 198 | Pt | 20.73279 | 22.73243 | 19.51477 | Pt | 0 | 0 | 0.00000 |
| HETATM | 199 | Pt | 6.22892  | 25.52325 | 19.51542 | Pt | 0 | 0 | 0.00000 |
| HETATM | 200 | Pt | 6.22918  | 8.77618  | 19.51527 | Pt | 0 | 0 | 0.00000 |
| HETATM | 201 | Pt | 6.22899  | 17.14985 | 19.51525 | Pt | 0 | 0 | 0.00000 |
| HETATM | 202 | Pt | 13.48076 | 29.71040 | 19.51527 | Pt | 0 | 0 | 0.00000 |
| HETATM | 203 | Pt | 13.48076 | 12.96288 | 19.51302 | Pt | 0 | 0 | 0.00000 |
| HETATM | 204 | Pt | 13.48064 | 21.33706 | 19.51484 | Pt | 0 | 0 | 0.00000 |
| HETATM | 205 | Pt | 20.73268 | 33.89706 | 19.51525 | Pt | 0 | 0 | 0.00000 |
| HETATM | 206 | Pt | 20.73307 | 17.14987 | 19.51484 | Pt | 0 | 0 | 0.00000 |
| HETATM | 207 | Pt | 20.73267 | 25.52356 | 19.51489 | Pt | 0 | 0 | 0.00000 |
| HETATM | 208 | Pt | 6.22893  | 28.31441 | 19.51537 | Pt | 0 | 0 | 0.00000 |
| HETATM | 209 | Pt | 6.22927  | 11.56753 | 19.51532 | Pt | 0 | 0 | 0.00000 |

|        |     |    |          |          |          |    |   |   |         |
|--------|-----|----|----------|----------|----------|----|---|---|---------|
| HETATM | 210 | Pt | 6.22898  | 19.94113 | 19.51522 | Pt | 0 | 0 | 0.00000 |
| HETATM | 211 | Pt | 13.48088 | 32.50120 | 19.51448 | Pt | 0 | 0 | 0.00000 |
| HETATM | 212 | Pt | 13.48076 | 15.75451 | 19.51343 | Pt | 0 | 0 | 0.00000 |
| HETATM | 213 | Pt | 13.48073 | 24.12820 | 19.51513 | Pt | 0 | 0 | 0.00000 |
| HETATM | 214 | Pt | 20.73318 | 36.68842 | 19.51500 | Pt | 0 | 0 | 0.00000 |
| HETATM | 215 | Pt | 20.73306 | 19.94114 | 19.51470 | Pt | 0 | 0 | 0.00000 |
| HETATM | 216 | Pt | 20.73269 | 28.31479 | 19.51498 | Pt | 0 | 0 | 0.00000 |
| HETATM | 217 | Pt | 8.64625  | 24.12784 | 19.51546 | Pt | 0 | 0 | 0.00000 |
| HETATM | 218 | Pt | 8.64604  | 7.38006  | 19.51456 | Pt | 0 | 0 | 0.00000 |
| HETATM | 219 | Pt | 8.64612  | 15.75470 | 19.51479 | Pt | 0 | 0 | 0.00000 |
| HETATM | 220 | Pt | 15.89809 | 28.31495 | 19.51506 | Pt | 0 | 0 | 0.00000 |
| HETATM | 221 | Pt | 15.89864 | 11.56719 | 19.51359 | Pt | 0 | 0 | 0.00000 |
| HETATM | 222 | Pt | 15.89813 | 19.94141 | 19.51432 | Pt | 0 | 0 | 0.00000 |
| HETATM | 223 | Pt | 1.39456  | 19.94101 | 19.51528 | Pt | 0 | 0 | 0.00000 |
| HETATM | 224 | Pt | 1.39498  | 3.19381  | 19.51529 | Pt | 0 | 0 | 0.00000 |
| HETATM | 225 | Pt | 1.39475  | 11.56748 | 19.51491 | Pt | 0 | 0 | 0.00000 |
| HETATM | 226 | Pt | 8.64613  | 26.91883 | 19.51537 | Pt | 0 | 0 | 0.00000 |
| HETATM | 227 | Pt | 8.64603  | 10.17168 | 19.51448 | Pt | 0 | 0 | 0.00000 |
| HETATM | 228 | Pt | 8.64612  | 18.54596 | 19.51499 | Pt | 0 | 0 | 0.00000 |
| HETATM | 229 | Pt | 15.89810 | 31.10615 | 19.51532 | Pt | 0 | 0 | 0.00000 |
| HETATM | 230 | Pt | 15.89838 | 14.35869 | 19.51342 | Pt | 0 | 0 | 0.00000 |
| HETATM | 231 | Pt | 15.89796 | 22.73268 | 19.51469 | Pt | 0 | 0 | 0.00000 |
| HETATM | 232 | Pt | 1.39464  | 22.73224 | 19.51522 | Pt | 0 | 0 | 0.00000 |
| HETATM | 233 | Pt | 1.39488  | 5.98505  | 19.51513 | Pt | 0 | 0 | 0.00000 |
| HETATM | 234 | Pt | 1.39458  | 14.35873 | 19.51498 | Pt | 0 | 0 | 0.00000 |
| HETATM | 235 | Pt | 8.64597  | 29.70970 | 19.51500 | Pt | 0 | 0 | 0.00000 |
| HETATM | 236 | Pt | 8.64604  | 12.96320 | 19.51468 | Pt | 0 | 0 | 0.00000 |
| HETATM | 237 | Pt | 8.64615  | 21.33687 | 19.51533 | Pt | 0 | 0 | 0.00000 |
| HETATM | 238 | Pt | 15.89840 | 33.89696 | 19.51468 | Pt | 0 | 0 | 0.00000 |
| HETATM | 239 | Pt | 15.89825 | 17.15011 | 19.51365 | Pt | 0 | 0 | 0.00000 |
| HETATM | 240 | Pt | 15.89797 | 25.52374 | 19.51491 | Pt | 0 | 0 | 0.00000 |
| HETATM | 241 | Pt | 1.39480  | 25.52344 | 19.51533 | Pt | 0 | 0 | 0.00000 |
| HETATM | 242 | Pt | 1.39483  | 8.77621  | 19.51491 | Pt | 0 | 0 | 0.00000 |
| HETATM | 243 | Pt | 1.39452  | 17.14982 | 19.51511 | Pt | 0 | 0 | 0.00000 |
| HETATM | 244 | Pt | 2.19985  | 1.79757  | 21.79475 | Pt | 0 | 0 | 0.00000 |
| HETATM | 245 | Pt | 2.20036  | 10.17144 | 21.79362 | Pt | 0 | 0 | 0.00000 |
| HETATM | 246 | Pt | 2.19989  | 18.54475 | 21.79424 | Pt | 0 | 0 | 0.00000 |
| HETATM | 247 | Pt | 9.45115  | 5.98340  | 21.79304 | Pt | 0 | 0 | 0.00000 |
| HETATM | 248 | Pt | 9.45133  | 14.35885 | 21.79261 | Pt | 0 | 0 | 0.00000 |
| HETATM | 249 | Pt | 9.45176  | 22.73159 | 21.79475 | Pt | 0 | 0 | 0.00000 |
| HETATM | 250 | Pt | 16.70443 | 10.17127 | 21.79261 | Pt | 0 | 0 | 0.00000 |
| HETATM | 251 | Pt | 16.70381 | 18.54536 | 21.79185 | Pt | 0 | 0 | 0.00000 |
| HETATM | 252 | Pt | 16.70350 | 26.91896 | 21.79362 | Pt | 0 | 0 | 0.00000 |
| HETATM | 253 | Pt | 2.19981  | 21.33695 | 21.79433 | Pt | 0 | 0 | 0.00000 |
| HETATM | 254 | Pt | 2.20012  | 4.59001  | 21.79453 | Pt | 0 | 0 | 0.00000 |
| HETATM | 255 | Pt | 2.20016  | 12.96367 | 21.79365 | Pt | 0 | 0 | 0.00000 |
| HETATM | 256 | Pt | 9.45171  | 25.52357 | 21.79473 | Pt | 0 | 0 | 0.00000 |
| HETATM | 257 | Pt | 9.45123  | 8.77582  | 21.79182 | Pt | 0 | 0 | 0.00000 |
| HETATM | 258 | Pt | 9.45174  | 17.15110 | 21.79325 | Pt | 0 | 0 | 0.00000 |
| HETATM | 259 | Pt | 16.70354 | 29.71124 | 21.79395 | Pt | 0 | 0 | 0.00000 |
| HETATM | 260 | Pt | 16.70406 | 12.96337 | 21.79082 | Pt | 0 | 0 | 0.00000 |
| HETATM | 261 | Pt | 16.70362 | 21.33778 | 21.79255 | Pt | 0 | 0 | 0.00000 |
| HETATM | 262 | Pt | 2.20079  | 24.12765 | 21.79438 | Pt | 0 | 0 | 0.00000 |
| HETATM | 263 | Pt | 2.20131  | 7.38074  | 21.79391 | Pt | 0 | 0 | 0.00000 |
| HETATM | 264 | Pt | 2.20098  | 15.75422 | 21.79390 | Pt | 0 | 0 | 0.00000 |
| HETATM | 265 | Pt | 9.45239  | 28.31403 | 21.79426 | Pt | 0 | 0 | 0.00000 |
| HETATM | 266 | Pt | 9.45215  | 11.56745 | 21.79202 | Pt | 0 | 0 | 0.00000 |
| HETATM | 267 | Pt | 9.45274  | 19.94129 | 21.79422 | Pt | 0 | 0 | 0.00000 |
| HETATM | 268 | Pt | 16.70442 | 32.50193 | 21.79472 | Pt | 0 | 0 | 0.00000 |
| HETATM | 269 | Pt | 16.70495 | 15.75461 | 21.79057 | Pt | 0 | 0 | 0.00000 |
| HETATM | 270 | Pt | 16.70444 | 24.12839 | 21.79328 | Pt | 0 | 0 | 0.00000 |
| HETATM | 271 | Pt | 4.61781  | 3.19351  | 21.79474 | Pt | 0 | 0 | 0.00000 |
| HETATM | 272 | Pt | 4.61852  | 11.56761 | 21.79395 | Pt | 0 | 0 | 0.00000 |

|        |     |    |          |          |          |    |   |   |         |
|--------|-----|----|----------|----------|----------|----|---|---|---------|
| HETATM | 273 | Pt | 4.61803  | 19.94078 | 21.79432 | Pt | 0 | 0 | 0.00000 |
| HETATM | 274 | Pt | 11.86942 | 7.37967  | 21.79182 | Pt | 0 | 0 | 0.00000 |
| HETATM | 275 | Pt | 11.86954 | 15.75458 | 21.79082 | Pt | 0 | 0 | 0.00000 |
| HETATM | 276 | Pt | 11.86997 | 24.12804 | 21.79453 | Pt | 0 | 0 | 0.00000 |
| HETATM | 277 | Pt | 19.12238 | 11.56776 | 21.79325 | Pt | 0 | 0 | 0.00000 |
| HETATM | 278 | Pt | 19.12220 | 19.94141 | 21.79255 | Pt | 0 | 0 | 0.00000 |
| HETATM | 279 | Pt | 19.12174 | 28.31491 | 21.79365 | Pt | 0 | 0 | 0.00000 |
| HETATM | 280 | Pt | 4.61704  | 22.73139 | 21.79453 | Pt | 0 | 0 | 0.00000 |
| HETATM | 281 | Pt | 4.61732  | 5.98448  | 21.79450 | Pt | 0 | 0 | 0.00000 |
| HETATM | 282 | Pt | 4.61744  | 14.35801 | 21.79407 | Pt | 0 | 0 | 0.00000 |
| HETATM | 283 | Pt | 11.86901 | 26.91863 | 21.79450 | Pt | 0 | 0 | 0.00000 |
| HETATM | 284 | Pt | 11.86866 | 10.17064 | 21.78973 | Pt | 0 | 0 | 0.00000 |
| HETATM | 285 | Pt | 11.86887 | 18.54565 | 21.79240 | Pt | 0 | 0 | 0.00000 |
| HETATM | 286 | Pt | 19.12064 | 31.10550 | 21.79407 | Pt | 0 | 0 | 0.00000 |
| HETATM | 287 | Pt | 19.12153 | 14.35833 | 21.79240 | Pt | 0 | 0 | 0.00000 |
| HETATM | 288 | Pt | 19.12102 | 22.73209 | 21.79304 | Pt | 0 | 0 | 0.00000 |
| HETATM | 289 | Pt | 4.61697  | 25.52362 | 21.79465 | Pt | 0 | 0 | 0.00000 |
| HETATM | 290 | Pt | 4.61767  | 8.77697  | 21.79411 | Pt | 0 | 0 | 0.00000 |
| HETATM | 291 | Pt | 4.61732  | 17.15012 | 21.79423 | Pt | 0 | 0 | 0.00000 |
| HETATM | 292 | Pt | 11.86896 | 29.71078 | 21.79416 | Pt | 0 | 0 | 0.00000 |
| HETATM | 293 | Pt | 11.86831 | 12.96348 | 21.78945 | Pt | 0 | 0 | 0.00000 |
| HETATM | 294 | Pt | 11.86899 | 21.33766 | 21.79395 | Pt | 0 | 0 | 0.00000 |
| HETATM | 295 | Pt | 19.12061 | 33.89774 | 21.79441 | Pt | 0 | 0 | 0.00000 |
| HETATM | 296 | Pt | 19.12118 | 17.15065 | 21.79275 | Pt | 0 | 0 | 0.00000 |
| HETATM | 297 | Pt | 19.12086 | 25.52431 | 21.79347 | Pt | 0 | 0 | 0.00000 |
| HETATM | 298 | Pt | 7.03407  | 4.58932  | 21.79427 | Pt | 0 | 0 | 0.00000 |
| HETATM | 299 | Pt | 7.03489  | 12.96371 | 21.79472 | Pt | 0 | 0 | 0.00000 |
| HETATM | 300 | Pt | 7.03437  | 21.33698 | 21.79437 | Pt | 0 | 0 | 0.00000 |
| HETATM | 301 | Pt | 14.28659 | 8.77628  | 21.79202 | Pt | 0 | 0 | 0.00000 |
| HETATM | 302 | Pt | 14.28637 | 17.15097 | 21.79057 | Pt | 0 | 0 | 0.00000 |
| HETATM | 303 | Pt | 14.28621 | 25.52444 | 21.79391 | Pt | 0 | 0 | 0.00000 |
| HETATM | 304 | Pt | 21.53825 | 12.96371 | 21.79422 | Pt | 0 | 0 | 0.00000 |
| HETATM | 305 | Pt | 21.53854 | 21.33742 | 21.79328 | Pt | 0 | 0 | 0.00000 |
| HETATM | 306 | Pt | 21.53802 | 29.71090 | 21.79390 | Pt | 0 | 0 | 0.00000 |
| HETATM | 307 | Pt | 7.03521  | 24.12744 | 21.79464 | Pt | 0 | 0 | 0.00000 |
| HETATM | 308 | Pt | 7.03541  | 7.38051  | 21.79416 | Pt | 0 | 0 | 0.00000 |
| HETATM | 309 | Pt | 7.03560  | 15.75410 | 21.79441 | Pt | 0 | 0 | 0.00000 |
| HETATM | 310 | Pt | 14.28720 | 28.31518 | 21.79411 | Pt | 0 | 0 | 0.00000 |
| HETATM | 311 | Pt | 14.28751 | 11.56676 | 21.78945 | Pt | 0 | 0 | 0.00000 |
| HETATM | 312 | Pt | 14.28727 | 19.94151 | 21.79275 | Pt | 0 | 0 | 0.00000 |
| HETATM | 313 | Pt | 21.53873 | 32.50145 | 21.79424 | Pt | 0 | 0 | 0.00000 |
| HETATM | 314 | Pt | 21.53942 | 15.75444 | 21.79395 | Pt | 0 | 0 | 0.00000 |
| HETATM | 315 | Pt | 21.53923 | 24.12807 | 21.79347 | Pt | 0 | 0 | 0.00000 |
| HETATM | 316 | Pt | 7.03419  | 26.91802 | 21.79457 | Pt | 0 | 0 | 0.00000 |
| HETATM | 317 | Pt | 7.03492  | 10.17161 | 21.79442 | Pt | 0 | 0 | 0.00000 |
| HETATM | 318 | Pt | 7.03444  | 18.54486 | 21.79401 | Pt | 0 | 0 | 0.00000 |
| HETATM | 319 | Pt | 14.28637 | 31.10590 | 21.79442 | Pt | 0 | 0 | 0.00000 |
| HETATM | 320 | Pt | 14.28626 | 14.35805 | 21.78979 | Pt | 0 | 0 | 0.00000 |
| HETATM | 321 | Pt | 14.28625 | 22.73216 | 21.79362 | Pt | 0 | 0 | 0.00000 |
| HETATM | 322 | Pt | 21.53805 | 35.29211 | 21.79402 | Pt | 0 | 0 | 0.00000 |
| HETATM | 323 | Pt | 21.53846 | 18.54510 | 21.79362 | Pt | 0 | 0 | 0.00000 |
| HETATM | 324 | Pt | 21.53816 | 26.91870 | 21.79364 | Pt | 0 | 0 | 0.00000 |
| HETATM | 325 | Pt | 3.00577  | 19.94058 | 24.06917 | Pt | 0 | 0 | 0.00000 |
| HETATM | 326 | Pt | 3.00488  | 3.19376  | 24.07000 | Pt | 0 | 0 | 0.00000 |
| HETATM | 327 | Pt | 3.00647  | 11.56774 | 24.06813 | Pt | 0 | 0 | 0.00000 |
| HETATM | 328 | Pt | 10.25840 | 24.12686 | 24.07000 | Pt | 0 | 0 | 0.00000 |
| HETATM | 329 | Pt | 10.25712 | 7.37937  | 24.06567 | Pt | 0 | 0 | 0.00000 |
| HETATM | 330 | Pt | 10.25821 | 15.75518 | 24.06651 | Pt | 0 | 0 | 0.00000 |
| HETATM | 331 | Pt | 17.50968 | 28.31523 | 24.06813 | Pt | 0 | 0 | 0.00000 |
| HETATM | 332 | Pt | 17.51024 | 11.56822 | 24.06651 | Pt | 0 | 0 | 0.00000 |
| HETATM | 333 | Pt | 17.51017 | 19.94201 | 24.06553 | Pt | 0 | 0 | 0.00000 |
| HETATM | 334 | Pt | 3.00542  | 22.73185 | 24.07570 | Pt | 0 | 0 | 0.00000 |
| HETATM | 335 | Pt | 3.00578  | 5.98529  | 24.07569 | Pt | 0 | 0 | 0.00000 |

|        |     |    |          |          |          |    |   |   |         |
|--------|-----|----|----------|----------|----------|----|---|---|---------|
| HETATM | 336 | Pt | 3.00645  | 14.35864 | 24.07482 | Pt | 0 | 0 | 0.00000 |
| HETATM | 337 | Pt | 10.25798 | 26.91839 | 24.07583 | Pt | 0 | 0 | 0.00000 |
| HETATM | 338 | Pt | 10.25736 | 10.17065 | 24.06895 | Pt | 0 | 0 | 0.00000 |
| HETATM | 339 | Pt | 10.25934 | 18.54495 | 24.07503 | Pt | 0 | 0 | 0.00000 |
| HETATM | 340 | Pt | 17.50919 | 31.10664 | 24.07541 | Pt | 0 | 0 | 0.00000 |
| HETATM | 341 | Pt | 17.50902 | 14.35877 | 24.06962 | Pt | 0 | 0 | 0.00000 |
| HETATM | 342 | Pt | 17.50988 | 22.73301 | 24.07334 | Pt | 0 | 0 | 0.00000 |
| HETATM | 343 | Pt | 3.00514  | 25.52316 | 24.07588 | Pt | 0 | 0 | 0.00000 |
| HETATM | 344 | Pt | 3.00653  | 8.77660  | 24.07475 | Pt | 0 | 0 | 0.00000 |
| HETATM | 345 | Pt | 3.00627  | 17.14949 | 24.07529 | Pt | 0 | 0 | 0.00000 |
| HETATM | 346 | Pt | 10.25757 | 29.70953 | 24.07466 | Pt | 0 | 0 | 0.00000 |
| HETATM | 347 | Pt | 10.25672 | 12.96422 | 24.07060 | Pt | 0 | 0 | 0.00000 |
| HETATM | 348 | Pt | 10.25860 | 21.33562 | 24.07613 | Pt | 0 | 0 | 0.00000 |
| HETATM | 349 | Pt | 17.50852 | 33.89798 | 24.07691 | Pt | 0 | 0 | 0.00000 |
| HETATM | 350 | Pt | 17.50882 | 17.15048 | 24.07208 | Pt | 0 | 0 | 0.00000 |
| HETATM | 351 | Pt | 17.50971 | 25.52407 | 24.07430 | Pt | 0 | 0 | 0.00000 |
| HETATM | 352 | Pt | 5.42325  | 21.33591 | 24.07570 | Pt | 0 | 0 | 0.00000 |
| HETATM | 353 | Pt | 5.42262  | 4.58916  | 24.07583 | Pt | 0 | 0 | 0.00000 |
| HETATM | 354 | Pt | 5.42415  | 12.96302 | 24.07541 | Pt | 0 | 0 | 0.00000 |
| HETATM | 355 | Pt | 12.67547 | 25.52341 | 24.07569 | Pt | 0 | 0 | 0.00000 |
| HETATM | 356 | Pt | 12.67431 | 8.77522  | 24.06895 | Pt | 0 | 0 | 0.00000 |
| HETATM | 357 | Pt | 12.67551 | 17.14940 | 24.06962 | Pt | 0 | 0 | 0.00000 |
| HETATM | 358 | Pt | 19.92669 | 29.71066 | 24.07482 | Pt | 0 | 0 | 0.00000 |
| HETATM | 359 | Pt | 19.92569 | 12.96408 | 24.07503 | Pt | 0 | 0 | 0.00000 |
| HETATM | 360 | Pt | 19.92738 | 21.33727 | 24.07334 | Pt | 0 | 0 | 0.00000 |
| HETATM | 361 | Pt | 5.42283  | 24.12707 | 24.06971 | Pt | 0 | 0 | 0.00000 |
| HETATM | 362 | Pt | 5.42363  | 7.38100  | 24.06912 | Pt | 0 | 0 | 0.00000 |
| HETATM | 363 | Pt | 5.42396  | 15.75354 | 24.06907 | Pt | 0 | 0 | 0.00000 |
| HETATM | 364 | Pt | 12.67527 | 28.31518 | 24.06912 | Pt | 0 | 0 | 0.00000 |
| HETATM | 365 | Pt | 12.67556 | 11.56824 | 24.06005 | Pt | 0 | 0 | 0.00000 |
| HETATM | 366 | Pt | 12.67569 | 19.94105 | 24.06742 | Pt | 0 | 0 | 0.00000 |
| HETATM | 367 | Pt | 19.92595 | 32.50174 | 24.06907 | Pt | 0 | 0 | 0.00000 |
| HETATM | 368 | Pt | 19.92657 | 15.75476 | 24.06742 | Pt | 0 | 0 | 0.00000 |
| HETATM | 369 | Pt | 19.92715 | 24.12835 | 24.06772 | Pt | 0 | 0 | 0.00000 |
| HETATM | 370 | Pt | 5.42258  | 26.91855 | 24.07586 | Pt | 0 | 0 | 0.00000 |
| HETATM | 371 | Pt | 5.42419  | 10.17254 | 24.07517 | Pt | 0 | 0 | 0.00000 |
| HETATM | 372 | Pt | 5.42357  | 18.54484 | 24.07528 | Pt | 0 | 0 | 0.00000 |
| HETATM | 373 | Pt | 12.67549 | 31.10701 | 24.07516 | Pt | 0 | 0 | 0.00000 |
| HETATM | 374 | Pt | 12.67434 | 14.35722 | 24.06794 | Pt | 0 | 0 | 0.00000 |
| HETATM | 375 | Pt | 12.67577 | 22.73189 | 24.07551 | Pt | 0 | 0 | 0.00000 |
| HETATM | 376 | Pt | 19.92607 | 35.29301 | 24.07477 | Pt | 0 | 0 | 0.00000 |
| HETATM | 377 | Pt | 19.92659 | 18.54588 | 24.07356 | Pt | 0 | 0 | 0.00000 |
| HETATM | 378 | Pt | 19.92697 | 26.91948 | 24.07445 | Pt | 0 | 0 | 0.00000 |
| HETATM | 379 | Pt | 7.84074  | 22.73132 | 24.07588 | Pt | 0 | 0 | 0.00000 |
| HETATM | 380 | Pt | 7.84003  | 5.98438  | 24.07466 | Pt | 0 | 0 | 0.00000 |
| HETATM | 381 | Pt | 7.84186  | 14.35812 | 24.07691 | Pt | 0 | 0 | 0.00000 |
| HETATM | 382 | Pt | 15.09245 | 26.91971 | 24.07475 | Pt | 0 | 0 | 0.00000 |
| HETATM | 383 | Pt | 15.09394 | 10.17145 | 24.07059 | Pt | 0 | 0 | 0.00000 |
| HETATM | 384 | Pt | 15.09330 | 18.54508 | 24.07208 | Pt | 0 | 0 | 0.00000 |
| HETATM | 385 | Pt | 0.58837  | 18.54547 | 24.07529 | Pt | 0 | 0 | 0.00000 |
| HETATM | 386 | Pt | 0.58749  | 1.79832  | 24.07613 | Pt | 0 | 0 | 0.00000 |
| HETATM | 387 | Pt | 0.58924  | 10.17219 | 24.07430 | Pt | 0 | 0 | 0.00000 |
| HETATM | 388 | Pt | 7.84046  | 25.52258 | 24.07586 | Pt | 0 | 0 | 0.00000 |
| HETATM | 389 | Pt | 7.84132  | 8.77710  | 24.07516 | Pt | 0 | 0 | 0.00000 |
| HETATM | 390 | Pt | 7.84122  | 17.14929 | 24.07477 | Pt | 0 | 0 | 0.00000 |
| HETATM | 391 | Pt | 15.09254 | 29.71143 | 24.07517 | Pt | 0 | 0 | 0.00000 |
| HETATM | 392 | Pt | 15.09150 | 12.96167 | 24.06794 | Pt | 0 | 0 | 0.00000 |
| HETATM | 393 | Pt | 15.09286 | 21.33663 | 24.07356 | Pt | 0 | 0 | 0.00000 |
| HETATM | 394 | Pt | 0.58812  | 21.33659 | 24.07528 | Pt | 0 | 0 | 0.00000 |
| HETATM | 395 | Pt | 0.58811  | 4.58978  | 24.07551 | Pt | 0 | 0 | 0.00000 |
| HETATM | 396 | Pt | 0.58907  | 12.96330 | 24.07445 | Pt | 0 | 0 | 0.00000 |
| HETATM | 397 | Pt | 7.84016  | 28.31399 | 24.06940 | Pt | 0 | 0 | 0.00000 |
| HETATM | 398 | Pt | 7.84201  | 11.56830 | 24.07056 | Pt | 0 | 0 | 0.00000 |



|        |     |    |          |          |          |    |   |   |         |
|--------|-----|----|----------|----------|----------|----|---|---|---------|
| HETATM | 399 | Pt | 7.84101  | 19.94028 | 24.06882 | Pt | 0 | 0 | 0.00000 |
| HETATM | 400 | Pt | 15.09239 | 32.50321 | 24.07056 | Pt | 0 | 0 | 0.00000 |
| HETATM | 401 | Pt | 15.09278 | 15.75499 | 24.06194 | Pt | 0 | 0 | 0.00000 |
| HETATM | 402 | Pt | 15.09256 | 24.12830 | 24.06807 | Pt | 0 | 0 | 0.00000 |
| HETATM | 403 | Pt | 0.58789  | 24.12788 | 24.06882 | Pt | 0 | 0 | 0.00000 |
| HETATM | 404 | Pt | 0.58904  | 7.38099  | 24.06807 | Pt | 0 | 0 | 0.00000 |
| HETATM | 405 | Pt | 0.58886  | 15.75437 | 24.06836 | Pt | 0 | 0 | 0.00000 |
| HETATM | 406 | Pt | 3.80638  | 21.32728 | 26.35256 | Pt | 0 | 0 | 0.00000 |
| HETATM | 407 | Pt | 3.80526  | 4.58111  | 26.35324 | Pt | 0 | 0 | 0.00000 |
| HETATM | 408 | Pt | 3.80847  | 12.95438 | 26.35147 | Pt | 0 | 0 | 0.00000 |
| HETATM | 409 | Pt | 11.05968 | 25.51368 | 26.35324 | Pt | 0 | 0 | 0.00000 |
| HETATM | 410 | Pt | 11.05906 | 8.76838  | 26.34631 | Pt | 0 | 0 | 0.00000 |
| HETATM | 411 | Pt | 11.06639 | 17.13697 | 26.35139 | Pt | 0 | 0 | 0.00000 |
| HETATM | 412 | Pt | 18.30954 | 29.70311 | 26.35146 | Pt | 0 | 0 | 0.00000 |
| HETATM | 413 | Pt | 18.30280 | 12.95902 | 26.35139 | Pt | 0 | 0 | 0.00000 |
| HETATM | 414 | Pt | 18.31101 | 21.32911 | 26.34923 | Pt | 0 | 0 | 0.00000 |
| HETATM | 415 | Pt | 3.82014  | 24.12747 | 26.35328 | Pt | 0 | 0 | 0.00000 |
| HETATM | 416 | Pt | 3.82166  | 7.38127  | 26.35241 | Pt | 0 | 0 | 0.00000 |
| HETATM | 417 | Pt | 3.82297  | 15.75365 | 26.35258 | Pt | 0 | 0 | 0.00000 |
| HETATM | 418 | Pt | 11.07390 | 28.31450 | 26.35266 | Pt | 0 | 0 | 0.00000 |
| HETATM | 419 | Pt | 11.07391 | 11.56669 | 26.33503 | Pt | 0 | 0 | 0.00000 |
| HETATM | 420 | Pt | 11.07667 | 19.93749 | 26.35408 | Pt | 0 | 0 | 0.00000 |
| HETATM | 421 | Pt | 18.32294 | 32.50409 | 26.35316 | Pt | 0 | 0 | 0.00000 |
| HETATM | 422 | Pt | 18.32141 | 15.75387 | 26.34535 | Pt | 0 | 0 | 0.00000 |
| HETATM | 423 | Pt | 18.32569 | 24.12841 | 26.35077 | Pt | 0 | 0 | 0.00000 |
| HETATM | 424 | Pt | 3.80499  | 26.92759 | 26.35301 | Pt | 0 | 0 | 0.00000 |
| HETATM | 425 | Pt | 3.80796  | 10.18117 | 26.35120 | Pt | 0 | 0 | 0.00000 |
| HETATM | 426 | Pt | 3.80755  | 18.55330 | 26.35257 | Pt | 0 | 0 | 0.00000 |
| HETATM | 427 | Pt | 11.05850 | 31.11442 | 26.34945 | Pt | 0 | 0 | 0.00000 |
| HETATM | 428 | Pt | 11.05891 | 14.36965 | 26.34621 | Pt | 0 | 0 | 0.00000 |
| HETATM | 429 | Pt | 11.06090 | 22.73749 | 26.35389 | Pt | 0 | 0 | 0.00000 |
| HETATM | 430 | Pt | 18.30842 | 35.30318 | 26.35299 | Pt | 0 | 0 | 0.00000 |
| HETATM | 431 | Pt | 18.30726 | 18.55495 | 26.34828 | Pt | 0 | 0 | 0.00000 |
| HETATM | 432 | Pt | 18.31046 | 26.92846 | 26.35143 | Pt | 0 | 0 | 0.00000 |
| HETATM | 433 | Pt | 6.22454  | 22.73929 | 26.35328 | Pt | 0 | 0 | 0.00000 |
| HETATM | 434 | Pt | 6.22373  | 5.99383  | 26.35266 | Pt | 0 | 0 | 0.00000 |
| HETATM | 435 | Pt | 6.22749  | 14.36648 | 26.35316 | Pt | 0 | 0 | 0.00000 |
| HETATM | 436 | Pt | 13.47649 | 26.92797 | 26.35241 | Pt | 0 | 0 | 0.00000 |
| HETATM | 437 | Pt | 13.47506 | 10.18040 | 26.33502 | Pt | 0 | 0 | 0.00000 |
| HETATM | 438 | Pt | 13.47752 | 18.55051 | 26.34534 | Pt | 0 | 0 | 0.00000 |
| HETATM | 439 | Pt | 20.72654 | 31.11529 | 26.35258 | Pt | 0 | 0 | 0.00000 |
| HETATM | 440 | Pt | 20.72299 | 14.36819 | 26.35408 | Pt | 0 | 0 | 0.00000 |
| HETATM | 441 | Pt | 20.72793 | 22.74147 | 26.35077 | Pt | 0 | 0 | 0.00000 |
| HETATM | 442 | Pt | 6.22351  | 25.51387 | 26.35279 | Pt | 0 | 0 | 0.00000 |
| HETATM | 443 | Pt | 6.22637  | 8.76872  | 26.35174 | Pt | 0 | 0 | 0.00000 |
| HETATM | 444 | Pt | 6.22587  | 17.13983 | 26.35169 | Pt | 0 | 0 | 0.00000 |
| HETATM | 445 | Pt | 13.47570 | 29.70424 | 26.35174 | Pt | 0 | 0 | 0.00000 |
| HETATM | 446 | Pt | 13.47862 | 12.95918 | 26.34998 | Pt | 0 | 0 | 0.00000 |
| HETATM | 447 | Pt | 13.47868 | 21.32552 | 26.35207 | Pt | 0 | 0 | 0.00000 |
| HETATM | 448 | Pt | 20.72555 | 33.88935 | 26.35169 | Pt | 0 | 0 | 0.00000 |
| HETATM | 449 | Pt | 20.72406 | 17.14240 | 26.35207 | Pt | 0 | 0 | 0.00000 |
| HETATM | 450 | Pt | 20.72803 | 25.51552 | 26.35119 | Pt | 0 | 0 | 0.00000 |
| HETATM | 451 | Pt | 6.23794  | 28.31423 | 26.35283 | Pt | 0 | 0 | 0.00000 |
| HETATM | 452 | Pt | 6.24154  | 11.56802 | 26.35356 | Pt | 0 | 0 | 0.00000 |
| HETATM | 453 | Pt | 6.24011  | 19.93964 | 26.35273 | Pt | 0 | 0 | 0.00000 |
| HETATM | 454 | Pt | 13.49183 | 32.50823 | 26.35424 | Pt | 0 | 0 | 0.00000 |
| HETATM | 455 | Pt | 13.49105 | 15.74588 | 26.33991 | Pt | 0 | 0 | 0.00000 |
| HETATM | 456 | Pt | 13.49206 | 24.12622 | 26.35264 | Pt | 0 | 0 | 0.00000 |
| HETATM | 457 | Pt | 20.73915 | 36.69059 | 26.35058 | Pt | 0 | 0 | 0.00000 |
| HETATM | 458 | Pt | 20.74203 | 19.94136 | 26.35005 | Pt | 0 | 0 | 0.00000 |
| HETATM | 459 | Pt | 20.74249 | 28.31549 | 26.35152 | Pt | 0 | 0 | 0.00000 |
| HETATM | 460 | Pt | 8.65709  | 24.12623 | 26.35301 | Pt | 0 | 0 | 0.00000 |
| HETATM | 461 | Pt | 8.65623  | 7.38046  | 26.34945 | Pt | 0 | 0 | 0.00000 |

|        |     |    |          |          |          |    |   |   |         |
|--------|-----|----|----------|----------|----------|----|---|---|---------|
| HETATM | 462 | Pt | 8.65884  | 15.75345 | 26.35300 | Pt | 0 | 0 | 0.00000 |
| HETATM | 463 | Pt | 15.90812 | 28.31606 | 26.35119 | Pt | 0 | 0 | 0.00000 |
| HETATM | 464 | Pt | 15.90999 | 11.56890 | 26.34621 | Pt | 0 | 0 | 0.00000 |
| HETATM | 465 | Pt | 15.91039 | 19.93879 | 26.34827 | Pt | 0 | 0 | 0.00000 |
| HETATM | 466 | Pt | 1.40346  | 19.94131 | 26.35256 | Pt | 0 | 0 | 0.00000 |
| HETATM | 467 | Pt | 1.40040  | 3.19407  | 26.35389 | Pt | 0 | 0 | 0.00000 |
| HETATM | 468 | Pt | 1.40511  | 11.56785 | 26.35143 | Pt | 0 | 0 | 0.00000 |
| HETATM | 469 | Pt | 8.64148  | 26.92655 | 26.35283 | Pt | 0 | 0 | 0.00000 |
| HETATM | 470 | Pt | 8.64663  | 10.18464 | 26.35424 | Pt | 0 | 0 | 0.00000 |
| HETATM | 471 | Pt | 8.64501  | 18.55222 | 26.35059 | Pt | 0 | 0 | 0.00000 |
| HETATM | 472 | Pt | 15.89237 | 31.11702 | 26.35356 | Pt | 0 | 0 | 0.00000 |
| HETATM | 473 | Pt | 15.88576 | 14.36327 | 26.33991 | Pt | 0 | 0 | 0.00000 |
| HETATM | 474 | Pt | 15.89367 | 22.74057 | 26.35004 | Pt | 0 | 0 | 0.00000 |
| HETATM | 475 | Pt | 1.38779  | 22.74113 | 26.35273 | Pt | 0 | 0 | 0.00000 |
| HETATM | 476 | Pt | 1.38749  | 5.99387  | 26.35264 | Pt | 0 | 0 | 0.00000 |
| HETATM | 477 | Pt | 1.39030  | 14.36757 | 26.35153 | Pt | 0 | 0 | 0.00000 |
| HETATM | 478 | Pt | 8.64134  | 29.70168 | 26.35259 | Pt | 0 | 0 | 0.00000 |
| HETATM | 479 | Pt | 8.64760  | 12.95337 | 26.35965 | Pt | 0 | 0 | 0.00000 |
| HETATM | 480 | Pt | 8.64286  | 21.32579 | 26.35276 | Pt | 0 | 0 | 0.00000 |
| HETATM | 481 | Pt | 15.88911 | 33.89340 | 26.35964 | Pt | 0 | 0 | 0.00000 |
| HETATM | 482 | Pt | 15.89212 | 17.13948 | 26.35276 | Pt | 0 | 0 | 0.00000 |
| HETATM | 483 | Pt | 15.89348 | 25.51538 | 26.35149 | Pt | 0 | 0 | 0.00000 |
| HETATM | 484 | Pt | 1.38684  | 25.51505 | 26.35276 | Pt | 0 | 0 | 0.00000 |
| HETATM | 485 | Pt | 1.38983  | 8.76815  | 26.35149 | Pt | 0 | 0 | 0.00000 |
| HETATM | 486 | Pt | 1.38961  | 17.14130 | 26.35198 | Pt | 0 | 0 | 0.00000 |
| HETATM | 487 | Pt | 2.20451  | 1.81534  | 28.71203 | Pt | 0 | 0 | 0.00000 |
| HETATM | 488 | Pt | 2.21141  | 10.18784 | 28.71260 | Pt | 0 | 0 | 0.00000 |
| HETATM | 489 | Pt | 2.20992  | 18.56216 | 28.71182 | Pt | 0 | 0 | 0.00000 |
| HETATM | 490 | Pt | 9.46195  | 6.00211  | 28.71332 | Pt | 0 | 0 | 0.00000 |
| HETATM | 491 | Pt | 9.46646  | 14.37644 | 28.72258 | Pt | 0 | 0 | 0.00000 |
| HETATM | 492 | Pt | 9.46484  | 22.74451 | 28.71206 | Pt | 0 | 0 | 0.00000 |
| HETATM | 493 | Pt | 16.71209 | 10.19319 | 28.72259 | Pt | 0 | 0 | 0.00000 |
| HETATM | 494 | Pt | 16.70969 | 18.55556 | 28.72793 | Pt | 0 | 0 | 0.00000 |
| HETATM | 495 | Pt | 16.71218 | 26.93674 | 28.71258 | Pt | 0 | 0 | 0.00000 |
| HETATM | 496 | Pt | 2.20807  | 21.32153 | 28.71445 | Pt | 0 | 0 | 0.00000 |
| HETATM | 497 | Pt | 2.20517  | 4.57361  | 28.71234 | Pt | 0 | 0 | 0.00000 |
| HETATM | 498 | Pt | 2.21291  | 12.94739 | 28.71158 | Pt | 0 | 0 | 0.00000 |
| HETATM | 499 | Pt | 9.46317  | 25.50487 | 28.71464 | Pt | 0 | 0 | 0.00000 |
| HETATM | 500 | Pt | 9.46946  | 8.76268  | 28.69781 | Pt | 0 | 0 | 0.00000 |
| HETATM | 501 | Pt | 9.48538  | 17.13115 | 28.70418 | Pt | 0 | 0 | 0.00000 |
| HETATM | 502 | Pt | 16.71055 | 29.69767 | 28.71409 | Pt | 0 | 0 | 0.00000 |
| HETATM | 503 | Pt | 16.66738 | 12.94369 | 28.72171 | Pt | 0 | 0 | 0.00000 |
| HETATM | 504 | Pt | 16.70959 | 21.31512 | 28.70613 | Pt | 0 | 0 | 0.00000 |
| HETATM | 505 | Pt | 2.17694  | 24.12900 | 28.71572 | Pt | 0 | 0 | 0.00000 |
| HETATM | 506 | Pt | 2.17893  | 7.37938  | 28.71326 | Pt | 0 | 0 | 0.00000 |
| HETATM | 507 | Pt | 2.18353  | 15.75469 | 28.71389 | Pt | 0 | 0 | 0.00000 |
| HETATM | 508 | Pt | 9.43357  | 28.31392 | 28.71280 | Pt | 0 | 0 | 0.00000 |
| HETATM | 509 | Pt | 9.46411  | 11.57044 | 28.74877 | Pt | 0 | 0 | 0.00000 |
| HETATM | 510 | Pt | 9.43994  | 19.93781 | 28.71449 | Pt | 0 | 0 | 0.00000 |
| HETATM | 511 | Pt | 16.67532 | 32.51011 | 28.71609 | Pt | 0 | 0 | 0.00000 |
| HETATM | 512 | Pt | 16.65562 | 15.70376 | 28.69370 | Pt | 0 | 0 | 0.00000 |
| HETATM | 513 | Pt | 16.68532 | 24.12560 | 28.71070 | Pt | 0 | 0 | 0.00000 |
| HETATM | 514 | Pt | 4.59590  | 3.19407  | 28.71464 | Pt | 0 | 0 | 0.00000 |
| HETATM | 515 | Pt | 4.60327  | 11.56689 | 28.71411 | Pt | 0 | 0 | 0.00000 |
| HETATM | 516 | Pt | 4.60051  | 19.94024 | 28.71446 | Pt | 0 | 0 | 0.00000 |
| HETATM | 517 | Pt | 11.84893 | 7.38890  | 28.69780 | Pt | 0 | 0 | 0.00000 |
| HETATM | 518 | Pt | 11.87086 | 15.71298 | 28.72171 | Pt | 0 | 0 | 0.00000 |
| HETATM | 519 | Pt | 11.85324 | 24.12421 | 28.71234 | Pt | 0 | 0 | 0.00000 |
| HETATM | 520 | Pt | 19.08830 | 11.58691 | 28.70419 | Pt | 0 | 0 | 0.00000 |
| HETATM | 521 | Pt | 19.09957 | 19.93526 | 28.70613 | Pt | 0 | 0 | 0.00000 |
| HETATM | 522 | Pt | 19.10128 | 28.31782 | 28.71158 | Pt | 0 | 0 | 0.00000 |
| HETATM | 523 | Pt | 4.62642  | 22.74764 | 28.71218 | Pt | 0 | 0 | 0.00000 |
| HETATM | 524 | Pt | 4.62631  | 6.00288  | 28.71467 | Pt | 0 | 0 | 0.00000 |

|        |     |    |          |          |          |    |   |   |         |
|--------|-----|----|----------|----------|----------|----|---|---|---------|
| HETATM | 525 | Pt | 4.63477  | 14.37307 | 28.71140 | Pt | 0 | 0 | 0.00000 |
| HETATM | 526 | Pt | 11.88046 | 26.93563 | 28.71469 | Pt | 0 | 0 | 0.00000 |
| HETATM | 527 | Pt | 11.86718 | 10.16808 | 28.64111 | Pt | 0 | 0 | 0.00000 |
| HETATM | 528 | Pt | 11.88545 | 18.55075 | 28.71711 | Pt | 0 | 0 | 0.00000 |
| HETATM | 529 | Pt | 19.12502 | 31.12805 | 28.71138 | Pt | 0 | 0 | 0.00000 |
| HETATM | 530 | Pt | 19.11768 | 14.37526 | 28.71711 | Pt | 0 | 0 | 0.00000 |
| HETATM | 531 | Pt | 19.12974 | 22.74721 | 28.71301 | Pt | 0 | 0 | 0.00000 |
| HETATM | 532 | Pt | 4.62535  | 25.50698 | 28.71403 | Pt | 0 | 0 | 0.00000 |
| HETATM | 533 | Pt | 4.63114  | 8.76283  | 28.71019 | Pt | 0 | 0 | 0.00000 |
| HETATM | 534 | Pt | 4.63135  | 17.13243 | 28.71403 | Pt | 0 | 0 | 0.00000 |
| HETATM | 535 | Pt | 11.87813 | 29.69650 | 28.71416 | Pt | 0 | 0 | 0.00000 |
| HETATM | 536 | Pt | 11.89442 | 12.96142 | 28.68309 | Pt | 0 | 0 | 0.00000 |
| HETATM | 537 | Pt | 11.88850 | 21.31127 | 28.71712 | Pt | 0 | 0 | 0.00000 |
| HETATM | 538 | Pt | 19.12683 | 33.88866 | 28.71615 | Pt | 0 | 0 | 0.00000 |
| HETATM | 539 | Pt | 19.10078 | 17.12240 | 28.69798 | Pt | 0 | 0 | 0.00000 |
| HETATM | 540 | Pt | 19.13019 | 25.50771 | 28.71223 | Pt | 0 | 0 | 0.00000 |
| HETATM | 541 | Pt | 7.04338  | 4.57299  | 28.71281 | Pt | 0 | 0 | 0.00000 |
| HETATM | 542 | Pt | 7.05654  | 12.94259 | 28.71609 | Pt | 0 | 0 | 0.00000 |
| HETATM | 543 | Pt | 7.04746  | 21.31701 | 28.71572 | Pt | 0 | 0 | 0.00000 |
| HETATM | 544 | Pt | 14.28321 | 8.78812  | 28.74878 | Pt | 0 | 0 | 0.00000 |
| HETATM | 545 | Pt | 14.26701 | 17.08285 | 28.69371 | Pt | 0 | 0 | 0.00000 |
| HETATM | 546 | Pt | 14.29624 | 25.50437 | 28.71325 | Pt | 0 | 0 | 0.00000 |
| HETATM | 547 | Pt | 21.54164 | 12.95088 | 28.71448 | Pt | 0 | 0 | 0.00000 |
| HETATM | 548 | Pt | 21.54567 | 21.31947 | 28.71070 | Pt | 0 | 0 | 0.00000 |
| HETATM | 549 | Pt | 21.54713 | 29.69604 | 28.71389 | Pt | 0 | 0 | 0.00000 |
| HETATM | 550 | Pt | 7.01660  | 24.12639 | 28.71404 | Pt | 0 | 0 | 0.00000 |
| HETATM | 551 | Pt | 7.01847  | 7.38131  | 28.71415 | Pt | 0 | 0 | 0.00000 |
| HETATM | 552 | Pt | 7.02464  | 15.75495 | 28.71617 | Pt | 0 | 0 | 0.00000 |
| HETATM | 553 | Pt | 14.26823 | 28.31978 | 28.71019 | Pt | 0 | 0 | 0.00000 |
| HETATM | 554 | Pt | 14.27266 | 11.58834 | 28.68308 | Pt | 0 | 0 | 0.00000 |
| HETATM | 555 | Pt | 14.27302 | 19.90981 | 28.69798 | Pt | 0 | 0 | 0.00000 |
| HETATM | 556 | Pt | 21.51640 | 32.50476 | 28.71403 | Pt | 0 | 0 | 0.00000 |
| HETATM | 557 | Pt | 21.50681 | 15.75812 | 28.71713 | Pt | 0 | 0 | 0.00000 |
| HETATM | 558 | Pt | 21.52016 | 24.12786 | 28.71223 | Pt | 0 | 0 | 0.00000 |
| HETATM | 559 | Pt | 7.04363  | 26.93438 | 28.71306 | Pt | 0 | 0 | 0.00000 |
| HETATM | 560 | Pt | 7.05952  | 10.19054 | 28.71278 | Pt | 0 | 0 | 0.00000 |
| HETATM | 561 | Pt | 7.05273  | 18.55700 | 28.70905 | Pt | 0 | 0 | 0.00000 |
| HETATM | 562 | Pt | 14.29049 | 31.13667 | 28.71278 | Pt | 0 | 0 | 0.00000 |
| HETATM | 563 | Pt | 14.27341 | 14.33578 | 29.29506 | Pt | 0 | 0 | 0.00000 |
| HETATM | 564 | Pt | 14.29834 | 22.74033 | 28.71642 | Pt | 0 | 0 | 0.00000 |
| HETATM | 565 | Pt | 21.53942 | 35.31402 | 28.70904 | Pt | 0 | 0 | 0.00000 |
| HETATM | 566 | Pt | 21.53950 | 18.55965 | 28.71643 | Pt | 0 | 0 | 0.00000 |
| HETATM | 567 | Pt | 21.54832 | 26.93632 | 28.71186 | Pt | 0 | 0 | 0.00000 |
| HETATM | 568 | O  | 3.00529  | 19.93964 | 29.83478 | O  | 0 | 0 | 0.00000 |
| HETATM | 569 | O  | 2.99992  | 3.19455  | 29.83444 | O  | 0 | 0 | 0.00000 |
| HETATM | 570 | O  | 3.00770  | 11.56837 | 29.83403 | O  | 0 | 0 | 0.00000 |
| HETATM | 571 | O  | 10.26153 | 24.12297 | 29.83442 | O  | 0 | 0 | 0.00000 |
| HETATM | 572 | O  | 10.26555 | 7.39392  | 29.82523 | O  | 0 | 0 | 0.00000 |
| HETATM | 573 | O  | 10.27972 | 15.75746 | 29.83384 | O  | 0 | 0 | 0.00000 |
| HETATM | 574 | O  | 17.50958 | 28.31661 | 29.83405 | O  | 0 | 0 | 0.00000 |
| HETATM | 575 | O  | 17.50140 | 11.58804 | 29.83383 | O  | 0 | 0 | 0.00000 |
| HETATM | 576 | O  | 17.51128 | 19.94389 | 29.83386 | O  | 0 | 0 | 0.00000 |
| HETATM | 577 | O  | 5.42211  | 24.12574 | 29.83477 | O  | 0 | 0 | 0.00000 |
| HETATM | 578 | O  | 5.42442  | 7.38470  | 29.83441 | O  | 0 | 0 | 0.00000 |
| HETATM | 579 | O  | 5.42763  | 15.75103 | 29.83505 | O  | 0 | 0 | 0.00000 |
| HETATM | 580 | O  | 12.67805 | 28.31773 | 29.83440 | O  | 0 | 0 | 0.00000 |
| HETATM | 581 | O  | 12.96564 | 12.07064 | 29.91800 | O  | 0 | 0 | 0.00000 |
| HETATM | 582 | O  | 12.69017 | 19.92032 | 29.83208 | O  | 0 | 0 | 0.00000 |
| HETATM | 583 | O  | 19.92190 | 32.50367 | 29.83507 | O  | 0 | 0 | 0.00000 |
| HETATM | 584 | O  | 19.90135 | 15.75697 | 29.83207 | O  | 0 | 0 | 0.00000 |
| HETATM | 585 | O  | 19.92714 | 24.12827 | 29.83378 | O  | 0 | 0 | 0.00000 |
| HETATM | 586 | O  | 7.84034  | 28.31425 | 29.83434 | O  | 0 | 0 | 0.00000 |
| HETATM | 587 | O  | 7.83218  | 11.56445 | 29.84543 | O  | 0 | 0 | 0.00000 |

|        |     |   |          |          |          |   |   |   |         |
|--------|-----|---|----------|----------|----------|---|---|---|---------|
| HETATM | 588 | O | 7.84638  | 19.93297 | 29.83440 | O | 0 | 0 | 0.00000 |
| HETATM | 589 | O | 15.09393 | 32.49277 | 29.84543 | O | 0 | 0 | 0.00000 |
| HETATM | 590 | O | 15.18708 | 15.91827 | 29.93205 | O | 0 | 0 | 0.00000 |
| HETATM | 591 | O | 15.09543 | 24.12633 | 29.83450 | O | 0 | 0 | 0.00000 |
| HETATM | 592 | O | 0.57887  | 24.12892 | 29.83441 | O | 0 | 0 | 0.00000 |
| HETATM | 593 | O | 0.58587  | 7.38250  | 29.83449 | O | 0 | 0 | 0.00000 |
| HETATM | 594 | O | 0.58878  | 15.75413 | 29.83443 | O | 0 | 0 | 0.00000 |

UNIT ENERGY kcal  
ENERGY -75121.438240  
END

XTLGRF 200

DESCRP FS

REMARK Pt111\_0.33ML\_9x9x7\_30.0\_vac hcp-displacement

FIXATOMS 1 162

CRYSTX 25.12092 25.12092 43.67409 90.00000 90.00000 60.00000

FORMAT ATOM (a6,lx,i5,lx,a5,lx,a3,lx,a1,lx,a5,3f10.5,lx,a5,i3,i2,lx,f8.5)

|        |    |    |          |          |          |    |   |   |         |
|--------|----|----|----------|----------|----------|----|---|---|---------|
| HETATM | 1  | Pt | 2.20033  | 1.79823  | 14.95718 | Pt | 0 | 0 | 0.00000 |
| HETATM | 2  | Pt | 2.20033  | 10.17187 | 14.95718 | Pt | 0 | 0 | 0.00000 |
| HETATM | 3  | Pt | 2.20033  | 18.54551 | 14.95718 | Pt | 0 | 0 | 0.00000 |
| HETATM | 4  | Pt | 9.45211  | 5.98505  | 14.95718 | Pt | 0 | 0 | 0.00000 |
| HETATM | 5  | Pt | 9.45211  | 14.35869 | 14.95718 | Pt | 0 | 0 | 0.00000 |
| HETATM | 6  | Pt | 9.45211  | 22.73233 | 14.95718 | Pt | 0 | 0 | 0.00000 |
| HETATM | 7  | Pt | 16.70390 | 10.17187 | 14.95718 | Pt | 0 | 0 | 0.00000 |
| HETATM | 8  | Pt | 16.70390 | 18.54551 | 14.95718 | Pt | 0 | 0 | 0.00000 |
| HETATM | 9  | Pt | 16.70390 | 26.91915 | 14.95718 | Pt | 0 | 0 | 0.00000 |
| HETATM | 10 | Pt | 2.20033  | 21.33672 | 14.95718 | Pt | 0 | 0 | 0.00000 |
| HETATM | 11 | Pt | 2.20033  | 4.58944  | 14.95718 | Pt | 0 | 0 | 0.00000 |
| HETATM | 12 | Pt | 2.20033  | 12.96308 | 14.95718 | Pt | 0 | 0 | 0.00000 |
| HETATM | 13 | Pt | 9.45211  | 25.52354 | 14.95718 | Pt | 0 | 0 | 0.00000 |
| HETATM | 14 | Pt | 9.45211  | 8.77626  | 14.95718 | Pt | 0 | 0 | 0.00000 |
| HETATM | 15 | Pt | 9.45211  | 17.14990 | 14.95718 | Pt | 0 | 0 | 0.00000 |
| HETATM | 16 | Pt | 16.70390 | 29.71036 | 14.95718 | Pt | 0 | 0 | 0.00000 |
| HETATM | 17 | Pt | 16.70390 | 12.96308 | 14.95718 | Pt | 0 | 0 | 0.00000 |
| HETATM | 18 | Pt | 16.70390 | 21.33672 | 14.95718 | Pt | 0 | 0 | 0.00000 |
| HETATM | 19 | Pt | 2.20033  | 24.12793 | 14.95718 | Pt | 0 | 0 | 0.00000 |
| HETATM | 20 | Pt | 2.20033  | 7.38065  | 14.95718 | Pt | 0 | 0 | 0.00000 |
| HETATM | 21 | Pt | 2.20033  | 15.75429 | 14.95718 | Pt | 0 | 0 | 0.00000 |
| HETATM | 22 | Pt | 9.45211  | 28.31475 | 14.95718 | Pt | 0 | 0 | 0.00000 |
| HETATM | 23 | Pt | 9.45211  | 11.56747 | 14.95718 | Pt | 0 | 0 | 0.00000 |
| HETATM | 24 | Pt | 9.45211  | 19.94111 | 14.95718 | Pt | 0 | 0 | 0.00000 |
| HETATM | 25 | Pt | 16.70390 | 32.50157 | 14.95718 | Pt | 0 | 0 | 0.00000 |
| HETATM | 26 | Pt | 16.70390 | 15.75429 | 14.95718 | Pt | 0 | 0 | 0.00000 |
| HETATM | 27 | Pt | 16.70390 | 24.12793 | 14.95718 | Pt | 0 | 0 | 0.00000 |
| HETATM | 28 | Pt | 4.61759  | 3.19384  | 14.95718 | Pt | 0 | 0 | 0.00000 |
| HETATM | 29 | Pt | 4.61759  | 11.56748 | 14.95718 | Pt | 0 | 0 | 0.00000 |
| HETATM | 30 | Pt | 4.61759  | 19.94112 | 14.95718 | Pt | 0 | 0 | 0.00000 |
| HETATM | 31 | Pt | 11.86937 | 7.38066  | 14.95718 | Pt | 0 | 0 | 0.00000 |
| HETATM | 32 | Pt | 11.86937 | 15.75430 | 14.95718 | Pt | 0 | 0 | 0.00000 |
| HETATM | 33 | Pt | 11.86937 | 24.12794 | 14.95718 | Pt | 0 | 0 | 0.00000 |
| HETATM | 34 | Pt | 19.12116 | 11.56748 | 14.95718 | Pt | 0 | 0 | 0.00000 |
| HETATM | 35 | Pt | 19.12116 | 19.94112 | 14.95718 | Pt | 0 | 0 | 0.00000 |
| HETATM | 36 | Pt | 19.12116 | 28.31476 | 14.95718 | Pt | 0 | 0 | 0.00000 |
| HETATM | 37 | Pt | 4.61759  | 22.73233 | 14.95718 | Pt | 0 | 0 | 0.00000 |
| HETATM | 38 | Pt | 4.61759  | 5.98505  | 14.95718 | Pt | 0 | 0 | 0.00000 |
| HETATM | 39 | Pt | 4.61759  | 14.35869 | 14.95718 | Pt | 0 | 0 | 0.00000 |
| HETATM | 40 | Pt | 11.86937 | 26.91915 | 14.95718 | Pt | 0 | 0 | 0.00000 |
| HETATM | 41 | Pt | 11.86937 | 10.17187 | 14.95718 | Pt | 0 | 0 | 0.00000 |
| HETATM | 42 | Pt | 11.86937 | 18.54551 | 14.95718 | Pt | 0 | 0 | 0.00000 |
| HETATM | 43 | Pt | 19.12116 | 31.10597 | 14.95718 | Pt | 0 | 0 | 0.00000 |
| HETATM | 44 | Pt | 19.12116 | 14.35869 | 14.95718 | Pt | 0 | 0 | 0.00000 |
| HETATM | 45 | Pt | 19.12116 | 22.73233 | 14.95718 | Pt | 0 | 0 | 0.00000 |
| HETATM | 46 | Pt | 4.61759  | 25.52354 | 14.95718 | Pt | 0 | 0 | 0.00000 |

|        |     |    |          |          |          |    |   |   |         |
|--------|-----|----|----------|----------|----------|----|---|---|---------|
| HETATM | 47  | Pt | 4.61759  | 8.77626  | 14.95718 | Pt | 0 | 0 | 0.00000 |
| HETATM | 48  | Pt | 4.61759  | 17.14990 | 14.95718 | Pt | 0 | 0 | 0.00000 |
| HETATM | 49  | Pt | 11.86937 | 29.71036 | 14.95718 | Pt | 0 | 0 | 0.00000 |
| HETATM | 50  | Pt | 11.86937 | 12.96308 | 14.95718 | Pt | 0 | 0 | 0.00000 |
| HETATM | 51  | Pt | 11.86937 | 21.33672 | 14.95718 | Pt | 0 | 0 | 0.00000 |
| HETATM | 52  | Pt | 19.12116 | 33.89718 | 14.95718 | Pt | 0 | 0 | 0.00000 |
| HETATM | 53  | Pt | 19.12116 | 17.14990 | 14.95718 | Pt | 0 | 0 | 0.00000 |
| HETATM | 54  | Pt | 19.12116 | 25.52354 | 14.95718 | Pt | 0 | 0 | 0.00000 |
| HETATM | 55  | Pt | 7.03485  | 4.58944  | 14.95718 | Pt | 0 | 0 | 0.00000 |
| HETATM | 56  | Pt | 7.03485  | 12.96308 | 14.95718 | Pt | 0 | 0 | 0.00000 |
| HETATM | 57  | Pt | 7.03485  | 21.33672 | 14.95718 | Pt | 0 | 0 | 0.00000 |
| HETATM | 58  | Pt | 14.28663 | 8.77626  | 14.95718 | Pt | 0 | 0 | 0.00000 |
| HETATM | 59  | Pt | 14.28663 | 17.14990 | 14.95718 | Pt | 0 | 0 | 0.00000 |
| HETATM | 60  | Pt | 14.28663 | 25.52354 | 14.95718 | Pt | 0 | 0 | 0.00000 |
| HETATM | 61  | Pt | 21.53842 | 12.96308 | 14.95718 | Pt | 0 | 0 | 0.00000 |
| HETATM | 62  | Pt | 21.53842 | 21.33672 | 14.95718 | Pt | 0 | 0 | 0.00000 |
| HETATM | 63  | Pt | 21.53842 | 29.71036 | 14.95718 | Pt | 0 | 0 | 0.00000 |
| HETATM | 64  | Pt | 7.03485  | 24.12793 | 14.95718 | Pt | 0 | 0 | 0.00000 |
| HETATM | 65  | Pt | 7.03485  | 7.38065  | 14.95718 | Pt | 0 | 0 | 0.00000 |
| HETATM | 66  | Pt | 7.03485  | 15.75429 | 14.95718 | Pt | 0 | 0 | 0.00000 |
| HETATM | 67  | Pt | 14.28663 | 28.31475 | 14.95718 | Pt | 0 | 0 | 0.00000 |
| HETATM | 68  | Pt | 14.28663 | 11.56747 | 14.95718 | Pt | 0 | 0 | 0.00000 |
| HETATM | 69  | Pt | 14.28663 | 19.94111 | 14.95718 | Pt | 0 | 0 | 0.00000 |
| HETATM | 70  | Pt | 21.53842 | 32.50157 | 14.95718 | Pt | 0 | 0 | 0.00000 |
| HETATM | 71  | Pt | 21.53842 | 15.75429 | 14.95718 | Pt | 0 | 0 | 0.00000 |
| HETATM | 72  | Pt | 21.53842 | 24.12793 | 14.95718 | Pt | 0 | 0 | 0.00000 |
| HETATM | 73  | Pt | 7.03485  | 26.91915 | 14.95718 | Pt | 0 | 0 | 0.00000 |
| HETATM | 74  | Pt | 7.03485  | 10.17187 | 14.95718 | Pt | 0 | 0 | 0.00000 |
| HETATM | 75  | Pt | 7.03485  | 18.54551 | 14.95718 | Pt | 0 | 0 | 0.00000 |
| HETATM | 76  | Pt | 14.28663 | 31.10597 | 14.95718 | Pt | 0 | 0 | 0.00000 |
| HETATM | 77  | Pt | 14.28663 | 14.35869 | 14.95718 | Pt | 0 | 0 | 0.00000 |
| HETATM | 78  | Pt | 14.28663 | 22.73233 | 14.95718 | Pt | 0 | 0 | 0.00000 |
| HETATM | 79  | Pt | 21.53842 | 35.29279 | 14.95718 | Pt | 0 | 0 | 0.00000 |
| HETATM | 80  | Pt | 21.53842 | 18.54551 | 14.95718 | Pt | 0 | 0 | 0.00000 |
| HETATM | 81  | Pt | 21.53842 | 26.91915 | 14.95718 | Pt | 0 | 0 | 0.00000 |
| HETATM | 82  | Pt | 3.00608  | 19.94112 | 17.23620 | Pt | 0 | 0 | 0.00000 |
| HETATM | 83  | Pt | 3.00608  | 3.19384  | 17.23620 | Pt | 0 | 0 | 0.00000 |
| HETATM | 84  | Pt | 3.00608  | 11.56748 | 17.23620 | Pt | 0 | 0 | 0.00000 |
| HETATM | 85  | Pt | 10.25786 | 24.12794 | 17.23620 | Pt | 0 | 0 | 0.00000 |
| HETATM | 86  | Pt | 10.25786 | 7.38066  | 17.23620 | Pt | 0 | 0 | 0.00000 |
| HETATM | 87  | Pt | 10.25786 | 15.75430 | 17.23620 | Pt | 0 | 0 | 0.00000 |
| HETATM | 88  | Pt | 17.50965 | 28.31476 | 17.23620 | Pt | 0 | 0 | 0.00000 |
| HETATM | 89  | Pt | 17.50965 | 11.56748 | 17.23620 | Pt | 0 | 0 | 0.00000 |
| HETATM | 90  | Pt | 17.50965 | 19.94112 | 17.23620 | Pt | 0 | 0 | 0.00000 |
| HETATM | 91  | Pt | 3.00608  | 22.73233 | 17.23620 | Pt | 0 | 0 | 0.00000 |
| HETATM | 92  | Pt | 3.00608  | 5.98505  | 17.23620 | Pt | 0 | 0 | 0.00000 |
| HETATM | 93  | Pt | 3.00608  | 14.35869 | 17.23620 | Pt | 0 | 0 | 0.00000 |
| HETATM | 94  | Pt | 10.25786 | 26.91915 | 17.23620 | Pt | 0 | 0 | 0.00000 |
| HETATM | 95  | Pt | 10.25786 | 10.17187 | 17.23620 | Pt | 0 | 0 | 0.00000 |
| HETATM | 96  | Pt | 10.25786 | 18.54551 | 17.23620 | Pt | 0 | 0 | 0.00000 |
| HETATM | 97  | Pt | 17.50965 | 31.10597 | 17.23620 | Pt | 0 | 0 | 0.00000 |
| HETATM | 98  | Pt | 17.50965 | 14.35869 | 17.23620 | Pt | 0 | 0 | 0.00000 |
| HETATM | 99  | Pt | 17.50965 | 22.73233 | 17.23620 | Pt | 0 | 0 | 0.00000 |
| HETATM | 100 | Pt | 3.00608  | 25.52354 | 17.23620 | Pt | 0 | 0 | 0.00000 |
| HETATM | 101 | Pt | 3.00608  | 8.77626  | 17.23620 | Pt | 0 | 0 | 0.00000 |
| HETATM | 102 | Pt | 3.00608  | 17.14990 | 17.23620 | Pt | 0 | 0 | 0.00000 |
| HETATM | 103 | Pt | 10.25786 | 29.71036 | 17.23620 | Pt | 0 | 0 | 0.00000 |
| HETATM | 104 | Pt | 10.25786 | 12.96308 | 17.23620 | Pt | 0 | 0 | 0.00000 |
| HETATM | 105 | Pt | 10.25786 | 21.33672 | 17.23620 | Pt | 0 | 0 | 0.00000 |
| HETATM | 106 | Pt | 17.50965 | 33.89718 | 17.23620 | Pt | 0 | 0 | 0.00000 |
| HETATM | 107 | Pt | 17.50965 | 17.14990 | 17.23620 | Pt | 0 | 0 | 0.00000 |
| HETATM | 108 | Pt | 17.50965 | 25.52354 | 17.23620 | Pt | 0 | 0 | 0.00000 |
| HETATM | 109 | Pt | 5.42334  | 21.33672 | 17.23620 | Pt | 0 | 0 | 0.00000 |

|        |     |    |          |          |          |    |   |   |         |
|--------|-----|----|----------|----------|----------|----|---|---|---------|
| HETATM | 110 | Pt | 5.42334  | 4.58944  | 17.23620 | Pt | 0 | 0 | 0.00000 |
| HETATM | 111 | Pt | 5.42334  | 12.96308 | 17.23620 | Pt | 0 | 0 | 0.00000 |
| HETATM | 112 | Pt | 12.67512 | 25.52354 | 17.23620 | Pt | 0 | 0 | 0.00000 |
| HETATM | 113 | Pt | 12.67512 | 8.77626  | 17.23620 | Pt | 0 | 0 | 0.00000 |
| HETATM | 114 | Pt | 12.67512 | 17.14990 | 17.23620 | Pt | 0 | 0 | 0.00000 |
| HETATM | 115 | Pt | 19.92691 | 29.71036 | 17.23620 | Pt | 0 | 0 | 0.00000 |
| HETATM | 116 | Pt | 19.92691 | 12.96308 | 17.23620 | Pt | 0 | 0 | 0.00000 |
| HETATM | 117 | Pt | 19.92691 | 21.33672 | 17.23620 | Pt | 0 | 0 | 0.00000 |
| HETATM | 118 | Pt | 5.42334  | 24.12793 | 17.23620 | Pt | 0 | 0 | 0.00000 |
| HETATM | 119 | Pt | 5.42334  | 7.38065  | 17.23620 | Pt | 0 | 0 | 0.00000 |
| HETATM | 120 | Pt | 5.42334  | 15.75429 | 17.23620 | Pt | 0 | 0 | 0.00000 |
| HETATM | 121 | Pt | 12.67512 | 28.31475 | 17.23620 | Pt | 0 | 0 | 0.00000 |
| HETATM | 122 | Pt | 12.67512 | 11.56747 | 17.23620 | Pt | 0 | 0 | 0.00000 |
| HETATM | 123 | Pt | 12.67512 | 19.94111 | 17.23620 | Pt | 0 | 0 | 0.00000 |
| HETATM | 124 | Pt | 19.92691 | 32.50157 | 17.23620 | Pt | 0 | 0 | 0.00000 |
| HETATM | 125 | Pt | 19.92691 | 15.75429 | 17.23620 | Pt | 0 | 0 | 0.00000 |
| HETATM | 126 | Pt | 19.92691 | 24.12793 | 17.23620 | Pt | 0 | 0 | 0.00000 |
| HETATM | 127 | Pt | 5.42334  | 26.91915 | 17.23620 | Pt | 0 | 0 | 0.00000 |
| HETATM | 128 | Pt | 5.42334  | 10.17187 | 17.23620 | Pt | 0 | 0 | 0.00000 |
| HETATM | 129 | Pt | 5.42334  | 18.54551 | 17.23620 | Pt | 0 | 0 | 0.00000 |
| HETATM | 130 | Pt | 12.67512 | 31.10597 | 17.23620 | Pt | 0 | 0 | 0.00000 |
| HETATM | 131 | Pt | 12.67512 | 14.35869 | 17.23620 | Pt | 0 | 0 | 0.00000 |
| HETATM | 132 | Pt | 12.67512 | 22.73233 | 17.23620 | Pt | 0 | 0 | 0.00000 |
| HETATM | 133 | Pt | 19.92691 | 35.29279 | 17.23620 | Pt | 0 | 0 | 0.00000 |
| HETATM | 134 | Pt | 19.92691 | 18.54551 | 17.23620 | Pt | 0 | 0 | 0.00000 |
| HETATM | 135 | Pt | 19.92691 | 26.91915 | 17.23620 | Pt | 0 | 0 | 0.00000 |
| HETATM | 136 | Pt | 7.84060  | 22.73233 | 17.23620 | Pt | 0 | 0 | 0.00000 |
| HETATM | 137 | Pt | 7.84060  | 5.98505  | 17.23620 | Pt | 0 | 0 | 0.00000 |
| HETATM | 138 | Pt | 7.84060  | 14.35869 | 17.23620 | Pt | 0 | 0 | 0.00000 |
| HETATM | 139 | Pt | 15.09238 | 26.91915 | 17.23620 | Pt | 0 | 0 | 0.00000 |
| HETATM | 140 | Pt | 15.09238 | 10.17187 | 17.23620 | Pt | 0 | 0 | 0.00000 |
| HETATM | 141 | Pt | 15.09238 | 18.54551 | 17.23620 | Pt | 0 | 0 | 0.00000 |
| HETATM | 142 | Pt | 0.58881  | 18.54551 | 17.23620 | Pt | 0 | 0 | 0.00000 |
| HETATM | 143 | Pt | 0.58881  | 1.79823  | 17.23620 | Pt | 0 | 0 | 0.00000 |
| HETATM | 144 | Pt | 0.58881  | 10.17187 | 17.23620 | Pt | 0 | 0 | 0.00000 |
| HETATM | 145 | Pt | 7.84060  | 25.52354 | 17.23620 | Pt | 0 | 0 | 0.00000 |
| HETATM | 146 | Pt | 7.84060  | 8.77626  | 17.23620 | Pt | 0 | 0 | 0.00000 |
| HETATM | 147 | Pt | 7.84060  | 17.14990 | 17.23620 | Pt | 0 | 0 | 0.00000 |
| HETATM | 148 | Pt | 15.09238 | 29.71036 | 17.23620 | Pt | 0 | 0 | 0.00000 |
| HETATM | 149 | Pt | 15.09238 | 12.96308 | 17.23620 | Pt | 0 | 0 | 0.00000 |
| HETATM | 150 | Pt | 15.09238 | 21.33672 | 17.23620 | Pt | 0 | 0 | 0.00000 |
| HETATM | 151 | Pt | 0.58881  | 21.33672 | 17.23620 | Pt | 0 | 0 | 0.00000 |
| HETATM | 152 | Pt | 0.58881  | 4.58944  | 17.23620 | Pt | 0 | 0 | 0.00000 |
| HETATM | 153 | Pt | 0.58881  | 12.96308 | 17.23620 | Pt | 0 | 0 | 0.00000 |
| HETATM | 154 | Pt | 7.84060  | 28.31475 | 17.23620 | Pt | 0 | 0 | 0.00000 |
| HETATM | 155 | Pt | 7.84060  | 11.56747 | 17.23620 | Pt | 0 | 0 | 0.00000 |
| HETATM | 156 | Pt | 7.84060  | 19.94111 | 17.23620 | Pt | 0 | 0 | 0.00000 |
| HETATM | 157 | Pt | 15.09238 | 32.50157 | 17.23620 | Pt | 0 | 0 | 0.00000 |
| HETATM | 158 | Pt | 15.09238 | 15.75429 | 17.23620 | Pt | 0 | 0 | 0.00000 |
| HETATM | 159 | Pt | 15.09238 | 24.12793 | 17.23620 | Pt | 0 | 0 | 0.00000 |
| HETATM | 160 | Pt | 0.58881  | 24.12793 | 17.23620 | Pt | 0 | 0 | 0.00000 |
| HETATM | 161 | Pt | 0.58881  | 7.38065  | 17.23620 | Pt | 0 | 0 | 0.00000 |
| HETATM | 162 | Pt | 0.58881  | 15.75429 | 17.23620 | Pt | 0 | 0 | 0.00000 |
| HETATM | 163 | Pt | 3.81166  | 21.33642 | 19.51580 | Pt | 0 | 0 | 0.00000 |
| HETATM | 164 | Pt | 3.81203  | 4.58919  | 19.51600 | Pt | 0 | 0 | 0.00000 |
| HETATM | 165 | Pt | 3.81200  | 12.96303 | 19.51527 | Pt | 0 | 0 | 0.00000 |
| HETATM | 166 | Pt | 11.06330 | 25.52359 | 19.51600 | Pt | 0 | 0 | 0.00000 |
| HETATM | 167 | Pt | 11.06285 | 8.77494  | 19.51263 | Pt | 0 | 0 | 0.00000 |
| HETATM | 168 | Pt | 11.06296 | 17.15086 | 19.51363 | Pt | 0 | 0 | 0.00000 |
| HETATM | 169 | Pt | 18.31527 | 29.71048 | 19.51527 | Pt | 0 | 0 | 0.00000 |
| HETATM | 170 | Pt | 18.31656 | 12.96299 | 19.51363 | Pt | 0 | 0 | 0.00000 |
| HETATM | 171 | Pt | 18.31555 | 21.33699 | 19.51423 | Pt | 0 | 0 | 0.00000 |
| HETATM | 172 | Pt | 3.81185  | 24.12759 | 19.51588 | Pt | 0 | 0 | 0.00000 |

|        |     |    |          |          |          |    |   |   |         |
|--------|-----|----|----------|----------|----------|----|---|---|---------|
| HETATM | 173 | Pt | 3.81235  | 7.38060  | 19.51559 | Pt | 0 | 0 | 0.00000 |
| HETATM | 174 | Pt | 3.81191  | 15.75418 | 19.51546 | Pt | 0 | 0 | 0.00000 |
| HETATM | 175 | Pt | 11.06334 | 28.31440 | 19.51578 | Pt | 0 | 0 | 0.00000 |
| HETATM | 176 | Pt | 11.06278 | 11.56695 | 19.51199 | Pt | 0 | 0 | 0.00000 |
| HETATM | 177 | Pt | 11.06314 | 19.94215 | 19.51488 | Pt | 0 | 0 | 0.00000 |
| HETATM | 178 | Pt | 18.31543 | 32.50164 | 19.51580 | Pt | 0 | 0 | 0.00000 |
| HETATM | 179 | Pt | 18.31648 | 15.75444 | 19.51339 | Pt | 0 | 0 | 0.00000 |
| HETATM | 180 | Pt | 18.31540 | 24.12824 | 19.51474 | Pt | 0 | 0 | 0.00000 |
| HETATM | 181 | Pt | 3.81181  | 26.91884 | 19.51609 | Pt | 0 | 0 | 0.00000 |
| HETATM | 182 | Pt | 3.81222  | 10.17194 | 19.51531 | Pt | 0 | 0 | 0.00000 |
| HETATM | 183 | Pt | 3.81169  | 18.54535 | 19.51571 | Pt | 0 | 0 | 0.00000 |
| HETATM | 184 | Pt | 11.06294 | 31.10483 | 19.51433 | Pt | 0 | 0 | 0.00000 |
| HETATM | 185 | Pt | 11.06267 | 14.35921 | 19.51246 | Pt | 0 | 0 | 0.00000 |
| HETATM | 186 | Pt | 11.06320 | 22.73293 | 19.51576 | Pt | 0 | 0 | 0.00000 |
| HETATM | 187 | Pt | 18.31632 | 35.29275 | 19.51479 | Pt | 0 | 0 | 0.00000 |
| HETATM | 188 | Pt | 18.31592 | 18.54575 | 19.51388 | Pt | 0 | 0 | 0.00000 |
| HETATM | 189 | Pt | 18.31527 | 26.91942 | 19.51501 | Pt | 0 | 0 | 0.00000 |
| HETATM | 190 | Pt | 6.22878  | 22.73217 | 19.51588 | Pt | 0 | 0 | 0.00000 |
| HETATM | 191 | Pt | 6.22893  | 5.98463  | 19.51578 | Pt | 0 | 0 | 0.00000 |
| HETATM | 192 | Pt | 6.22913  | 14.35875 | 19.51580 | Pt | 0 | 0 | 0.00000 |
| HETATM | 193 | Pt | 13.48057 | 26.91957 | 19.51559 | Pt | 0 | 0 | 0.00000 |
| HETATM | 194 | Pt | 13.48084 | 10.17089 | 19.51199 | Pt | 0 | 0 | 0.00000 |
| HETATM | 195 | Pt | 13.48046 | 18.54651 | 19.51339 | Pt | 0 | 0 | 0.00000 |
| HETATM | 196 | Pt | 20.73252 | 31.10598 | 19.51546 | Pt | 0 | 0 | 0.00000 |
| HETATM | 197 | Pt | 20.73379 | 14.35879 | 19.51488 | Pt | 0 | 0 | 0.00000 |
| HETATM | 198 | Pt | 20.73293 | 22.73248 | 19.51474 | Pt | 0 | 0 | 0.00000 |
| HETATM | 199 | Pt | 6.22878  | 25.52301 | 19.51600 | Pt | 0 | 0 | 0.00000 |
| HETATM | 200 | Pt | 6.22928  | 8.77615  | 19.51571 | Pt | 0 | 0 | 0.00000 |
| HETATM | 201 | Pt | 6.22891  | 17.14985 | 19.51567 | Pt | 0 | 0 | 0.00000 |
| HETATM | 202 | Pt | 13.48068 | 29.71047 | 19.51571 | Pt | 0 | 0 | 0.00000 |
| HETATM | 203 | Pt | 13.48068 | 12.96274 | 19.51135 | Pt | 0 | 0 | 0.00000 |
| HETATM | 204 | Pt | 13.48045 | 21.33742 | 19.51488 | Pt | 0 | 0 | 0.00000 |
| HETATM | 205 | Pt | 20.73271 | 33.89699 | 19.51567 | Pt | 0 | 0 | 0.00000 |
| HETATM | 206 | Pt | 20.73348 | 17.14988 | 19.51488 | Pt | 0 | 0 | 0.00000 |
| HETATM | 207 | Pt | 20.73270 | 25.52361 | 19.51497 | Pt | 0 | 0 | 0.00000 |
| HETATM | 208 | Pt | 6.22874  | 28.31408 | 19.51591 | Pt | 0 | 0 | 0.00000 |
| HETATM | 209 | Pt | 6.22939  | 11.56758 | 19.51580 | Pt | 0 | 0 | 0.00000 |
| HETATM | 210 | Pt | 6.22883  | 19.94115 | 19.51561 | Pt | 0 | 0 | 0.00000 |
| HETATM | 211 | Pt | 13.48083 | 32.50085 | 19.51419 | Pt | 0 | 0 | 0.00000 |
| HETATM | 212 | Pt | 13.48060 | 15.75470 | 19.51213 | Pt | 0 | 0 | 0.00000 |
| HETATM | 213 | Pt | 13.48054 | 24.12845 | 19.51543 | Pt | 0 | 0 | 0.00000 |
| HETATM | 214 | Pt | 20.73361 | 36.68844 | 19.51517 | Pt | 0 | 0 | 0.00000 |
| HETATM | 215 | Pt | 20.73338 | 19.94116 | 19.51459 | Pt | 0 | 0 | 0.00000 |
| HETATM | 216 | Pt | 20.73268 | 28.31481 | 19.51514 | Pt | 0 | 0 | 0.00000 |
| HETATM | 217 | Pt | 8.64610  | 24.12776 | 19.51609 | Pt | 0 | 0 | 0.00000 |
| HETATM | 218 | Pt | 8.64571  | 7.37950  | 19.51433 | Pt | 0 | 0 | 0.00000 |
| HETATM | 219 | Pt | 8.64586  | 15.75507 | 19.51479 | Pt | 0 | 0 | 0.00000 |
| HETATM | 220 | Pt | 15.89800 | 28.31513 | 19.51530 | Pt | 0 | 0 | 0.00000 |
| HETATM | 221 | Pt | 15.89906 | 11.56692 | 19.51246 | Pt | 0 | 0 | 0.00000 |
| HETATM | 222 | Pt | 15.89808 | 19.94169 | 19.51388 | Pt | 0 | 0 | 0.00000 |
| HETATM | 223 | Pt | 1.39451  | 19.94091 | 19.51571 | Pt | 0 | 0 | 0.00000 |
| HETATM | 224 | Pt | 1.39530  | 3.19378  | 19.51576 | Pt | 0 | 0 | 0.00000 |
| HETATM | 225 | Pt | 1.39487  | 11.56749 | 19.51501 | Pt | 0 | 0 | 0.00000 |
| HETATM | 226 | Pt | 8.64595  | 26.91850 | 19.51591 | Pt | 0 | 0 | 0.00000 |
| HETATM | 227 | Pt | 8.64575  | 10.17146 | 19.51419 | Pt | 0 | 0 | 0.00000 |
| HETATM | 228 | Pt | 8.64592  | 18.54635 | 19.51517 | Pt | 0 | 0 | 0.00000 |
| HETATM | 229 | Pt | 15.89809 | 31.10628 | 19.51580 | Pt | 0 | 0 | 0.00000 |
| HETATM | 230 | Pt | 15.89863 | 14.35865 | 19.51212 | Pt | 0 | 0 | 0.00000 |
| HETATM | 231 | Pt | 15.89782 | 22.73297 | 19.51459 | Pt | 0 | 0 | 0.00000 |
| HETATM | 232 | Pt | 1.39473  | 22.73212 | 19.51561 | Pt | 0 | 0 | 0.00000 |
| HETATM | 233 | Pt | 1.39518  | 5.98501  | 19.51543 | Pt | 0 | 0 | 0.00000 |
| HETATM | 234 | Pt | 1.39461  | 14.35873 | 19.51514 | Pt | 0 | 0 | 0.00000 |
| HETATM | 235 | Pt | 8.64564  | 29.70912 | 19.51519 | Pt | 0 | 0 | 0.00000 |

|        |     |    |          |          |          |    |   |   |         |
|--------|-----|----|----------|----------|----------|----|---|---|---------|
| HETATM | 236 | Pt | 8.64576  | 12.96335 | 19.51456 | Pt | 0 | 0 | 0.00000 |
| HETATM | 237 | Pt | 8.64599  | 21.33705 | 19.51582 | Pt | 0 | 0 | 0.00000 |
| HETATM | 238 | Pt | 15.89867 | 33.89680 | 19.51456 | Pt | 0 | 0 | 0.00000 |
| HETATM | 239 | Pt | 15.89839 | 17.15034 | 19.51258 | Pt | 0 | 0 | 0.00000 |
| HETATM | 240 | Pt | 15.89783 | 25.52397 | 19.51502 | Pt | 0 | 0 | 0.00000 |
| HETATM | 241 | Pt | 1.39504  | 25.52339 | 19.51582 | Pt | 0 | 0 | 0.00000 |
| HETATM | 242 | Pt | 1.39509  | 8.77621  | 19.51502 | Pt | 0 | 0 | 0.00000 |
| HETATM | 243 | Pt | 1.39451  | 17.14978 | 19.51540 | Pt | 0 | 0 | 0.00000 |
| HETATM | 244 | Pt | 2.19970  | 1.79744  | 21.79606 | Pt | 0 | 0 | 0.00000 |
| HETATM | 245 | Pt | 2.20067  | 10.17153 | 21.79387 | Pt | 0 | 0 | 0.00000 |
| HETATM | 246 | Pt | 2.19976  | 18.54453 | 21.79507 | Pt | 0 | 0 | 0.00000 |
| HETATM | 247 | Pt | 9.45055  | 5.98235  | 21.79275 | Pt | 0 | 0 | 0.00000 |
| HETATM | 248 | Pt | 9.45088  | 14.35950 | 21.79191 | Pt | 0 | 0 | 0.00000 |
| HETATM | 249 | Pt | 9.45173  | 22.73140 | 21.79606 | Pt | 0 | 0 | 0.00000 |
| HETATM | 250 | Pt | 16.70521 | 10.17121 | 21.79191 | Pt | 0 | 0 | 0.00000 |
| HETATM | 251 | Pt | 16.70401 | 18.54571 | 21.79043 | Pt | 0 | 0 | 0.00000 |
| HETATM | 252 | Pt | 16.70343 | 26.91928 | 21.79387 | Pt | 0 | 0 | 0.00000 |
| HETATM | 253 | Pt | 2.19962  | 21.33667 | 21.79524 | Pt | 0 | 0 | 0.00000 |
| HETATM | 254 | Pt | 2.20021  | 4.59005  | 21.79563 | Pt | 0 | 0 | 0.00000 |
| HETATM | 255 | Pt | 2.20030  | 12.96373 | 21.79393 | Pt | 0 | 0 | 0.00000 |
| HETATM | 256 | Pt | 9.45163  | 25.52311 | 21.79603 | Pt | 0 | 0 | 0.00000 |
| HETATM | 257 | Pt | 9.45070  | 8.77491  | 21.79038 | Pt | 0 | 0 | 0.00000 |
| HETATM | 258 | Pt | 9.45169  | 17.15173 | 21.79314 | Pt | 0 | 0 | 0.00000 |
| HETATM | 259 | Pt | 16.70350 | 29.71156 | 21.79451 | Pt | 0 | 0 | 0.00000 |
| HETATM | 260 | Pt | 16.70449 | 12.96315 | 21.78843 | Pt | 0 | 0 | 0.00000 |
| HETATM | 261 | Pt | 16.70366 | 21.33827 | 21.79178 | Pt | 0 | 0 | 0.00000 |
| HETATM | 262 | Pt | 2.20065  | 24.12738 | 21.79533 | Pt | 0 | 0 | 0.00000 |
| HETATM | 263 | Pt | 2.20167  | 7.38082  | 21.79443 | Pt | 0 | 0 | 0.00000 |
| HETATM | 264 | Pt | 2.20103  | 15.75415 | 21.79440 | Pt | 0 | 0 | 0.00000 |
| HETATM | 265 | Pt | 9.45209  | 28.31334 | 21.79512 | Pt | 0 | 0 | 0.00000 |
| HETATM | 266 | Pt | 9.45162  | 11.56743 | 21.79077 | Pt | 0 | 0 | 0.00000 |
| HETATM | 267 | Pt | 9.45275  | 19.94146 | 21.79503 | Pt | 0 | 0 | 0.00000 |
| HETATM | 268 | Pt | 16.70434 | 32.50226 | 21.79600 | Pt | 0 | 0 | 0.00000 |
| HETATM | 269 | Pt | 16.70537 | 15.75490 | 21.78796 | Pt | 0 | 0 | 0.00000 |
| HETATM | 270 | Pt | 16.70438 | 24.12882 | 21.79320 | Pt | 0 | 0 | 0.00000 |
| HETATM | 271 | Pt | 4.61745  | 3.19321  | 21.79603 | Pt | 0 | 0 | 0.00000 |
| HETATM | 272 | Pt | 4.61882  | 11.56774 | 21.79451 | Pt | 0 | 0 | 0.00000 |
| HETATM | 273 | Pt | 4.61789  | 19.94048 | 21.79524 | Pt | 0 | 0 | 0.00000 |
| HETATM | 274 | Pt | 11.86890 | 7.37876  | 21.79038 | Pt | 0 | 0 | 0.00000 |
| HETATM | 275 | Pt | 11.86913 | 15.75484 | 21.78843 | Pt | 0 | 0 | 0.00000 |
| HETATM | 276 | Pt | 11.86996 | 24.12814 | 21.79563 | Pt | 0 | 0 | 0.00000 |
| HETATM | 277 | Pt | 19.12295 | 11.56803 | 21.79314 | Pt | 0 | 0 | 0.00000 |
| HETATM | 278 | Pt | 19.12261 | 19.94169 | 21.79178 | Pt | 0 | 0 | 0.00000 |
| HETATM | 279 | Pt | 19.12172 | 28.31506 | 21.79393 | Pt | 0 | 0 | 0.00000 |
| HETATM | 280 | Pt | 4.61682  | 22.73100 | 21.79563 | Pt | 0 | 0 | 0.00000 |
| HETATM | 281 | Pt | 4.61736  | 5.98445  | 21.79557 | Pt | 0 | 0 | 0.00000 |
| HETATM | 282 | Pt | 4.61759  | 14.35787 | 21.79473 | Pt | 0 | 0 | 0.00000 |
| HETATM | 283 | Pt | 11.86896 | 26.91865 | 21.79557 | Pt | 0 | 0 | 0.00000 |
| HETATM | 284 | Pt | 11.86828 | 10.16999 | 21.78632 | Pt | 0 | 0 | 0.00000 |
| HETATM | 285 | Pt | 11.86870 | 18.54628 | 21.79150 | Pt | 0 | 0 | 0.00000 |
| HETATM | 286 | Pt | 19.12045 | 31.10556 | 21.79473 | Pt | 0 | 0 | 0.00000 |
| HETATM | 287 | Pt | 19.12216 | 14.35849 | 21.79150 | Pt | 0 | 0 | 0.00000 |
| HETATM | 288 | Pt | 19.12118 | 22.73237 | 21.79273 | Pt | 0 | 0 | 0.00000 |
| HETATM | 289 | Pt | 4.61669  | 25.52319 | 21.79585 | Pt | 0 | 0 | 0.00000 |
| HETATM | 290 | Pt | 4.61803  | 8.77714  | 21.79482 | Pt | 0 | 0 | 0.00000 |
| HETATM | 291 | Pt | 4.61736  | 17.14982 | 21.79506 | Pt | 0 | 0 | 0.00000 |
| HETATM | 292 | Pt | 11.86885 | 29.71067 | 21.79490 | Pt | 0 | 0 | 0.00000 |
| HETATM | 293 | Pt | 11.86760 | 12.96336 | 21.78578 | Pt | 0 | 0 | 0.00000 |
| HETATM | 294 | Pt | 11.86892 | 21.33804 | 21.79450 | Pt | 0 | 0 | 0.00000 |
| HETATM | 295 | Pt | 19.12039 | 33.89776 | 21.79540 | Pt | 0 | 0 | 0.00000 |
| HETATM | 296 | Pt | 19.12148 | 17.15086 | 21.79217 | Pt | 0 | 0 | 0.00000 |
| HETATM | 297 | Pt | 19.12088 | 25.52453 | 21.79357 | Pt | 0 | 0 | 0.00000 |
| HETATM | 298 | Pt | 7.03363  | 4.58872  | 21.79512 | Pt | 0 | 0 | 0.00000 |



|        |     |    |          |          |          |    |   |   |         |
|--------|-----|----|----------|----------|----------|----|---|---|---------|
| HETATM | 299 | Pt | 7.03521  | 12.96381 | 21.79600 | Pt | 0 | 0 | 0.00000 |
| HETATM | 300 | Pt | 7.03421  | 21.33673 | 21.79533 | Pt | 0 | 0 | 0.00000 |
| HETATM | 301 | Pt | 14.28683 | 8.77581  | 21.79077 | Pt | 0 | 0 | 0.00000 |
| HETATM | 302 | Pt | 14.28642 | 17.15148 | 21.78796 | Pt | 0 | 0 | 0.00000 |
| HETATM | 303 | Pt | 14.28610 | 25.52479 | 21.79443 | Pt | 0 | 0 | 0.00000 |
| HETATM | 304 | Pt | 21.53839 | 12.96381 | 21.79503 | Pt | 0 | 0 | 0.00000 |
| HETATM | 305 | Pt | 21.53894 | 21.33758 | 21.79320 | Pt | 0 | 0 | 0.00000 |
| HETATM | 306 | Pt | 21.53794 | 29.71090 | 21.79440 | Pt | 0 | 0 | 0.00000 |
| HETATM | 307 | Pt | 7.03498  | 24.12698 | 21.79585 | Pt | 0 | 0 | 0.00000 |
| HETATM | 308 | Pt | 7.03537  | 7.38036  | 21.79490 | Pt | 0 | 0 | 0.00000 |
| HETATM | 309 | Pt | 7.03573  | 15.75392 | 21.79540 | Pt | 0 | 0 | 0.00000 |
| HETATM | 310 | Pt | 14.28717 | 28.31558 | 21.79482 | Pt | 0 | 0 | 0.00000 |
| HETATM | 311 | Pt | 14.28776 | 11.56608 | 21.78578 | Pt | 0 | 0 | 0.00000 |
| HETATM | 312 | Pt | 14.28730 | 19.94187 | 21.79217 | Pt | 0 | 0 | 0.00000 |
| HETATM | 313 | Pt | 21.53845 | 32.50134 | 21.79506 | Pt | 0 | 0 | 0.00000 |
| HETATM | 314 | Pt | 21.53979 | 15.75457 | 21.79450 | Pt | 0 | 0 | 0.00000 |
| HETATM | 315 | Pt | 21.53941 | 24.12819 | 21.79357 | Pt | 0 | 0 | 0.00000 |
| HETATM | 316 | Pt | 7.03387  | 26.91746 | 21.79572 | Pt | 0 | 0 | 0.00000 |
| HETATM | 317 | Pt | 7.03527  | 10.17186 | 21.79542 | Pt | 0 | 0 | 0.00000 |
| HETATM | 318 | Pt | 7.03434  | 18.54474 | 21.79463 | Pt | 0 | 0 | 0.00000 |
| HETATM | 319 | Pt | 14.28641 | 31.10633 | 21.79542 | Pt | 0 | 0 | 0.00000 |
| HETATM | 320 | Pt | 14.28621 | 14.35795 | 21.78644 | Pt | 0 | 0 | 0.00000 |
| HETATM | 321 | Pt | 14.28618 | 22.73250 | 21.79386 | Pt | 0 | 0 | 0.00000 |
| HETATM | 322 | Pt | 21.53800 | 35.29197 | 21.79463 | Pt | 0 | 0 | 0.00000 |
| HETATM | 323 | Pt | 21.53879 | 18.54521 | 21.79386 | Pt | 0 | 0 | 0.00000 |
| HETATM | 324 | Pt | 21.53820 | 26.91877 | 21.79391 | Pt | 0 | 0 | 0.00000 |
| HETATM | 325 | Pt | 3.00547  | 19.94007 | 24.07048 | Pt | 0 | 0 | 0.00000 |
| HETATM | 326 | Pt | 3.00375  | 3.19369  | 24.07209 | Pt | 0 | 0 | 0.00000 |
| HETATM | 327 | Pt | 3.00684  | 11.56799 | 24.06847 | Pt | 0 | 0 | 0.00000 |
| HETATM | 328 | Pt | 10.25890 | 24.12585 | 24.07209 | Pt | 0 | 0 | 0.00000 |
| HETATM | 329 | Pt | 10.25643 | 7.37817  | 24.06370 | Pt | 0 | 0 | 0.00000 |
| HETATM | 330 | Pt | 10.25853 | 15.75601 | 24.06533 | Pt | 0 | 0 | 0.00000 |
| HETATM | 331 | Pt | 17.50971 | 28.31567 | 24.06847 | Pt | 0 | 0 | 0.00000 |
| HETATM | 332 | Pt | 17.51080 | 11.56891 | 24.06533 | Pt | 0 | 0 | 0.00000 |
| HETATM | 333 | Pt | 17.51065 | 19.94285 | 24.06343 | Pt | 0 | 0 | 0.00000 |
| HETATM | 334 | Pt | 3.00481  | 22.73140 | 24.07723 | Pt | 0 | 0 | 0.00000 |
| HETATM | 335 | Pt | 3.00551  | 5.98551  | 24.07721 | Pt | 0 | 0 | 0.00000 |
| HETATM | 336 | Pt | 3.00679  | 14.35860 | 24.07552 | Pt | 0 | 0 | 0.00000 |
| HETATM | 337 | Pt | 10.25809 | 26.91768 | 24.07749 | Pt | 0 | 0 | 0.00000 |
| HETATM | 338 | Pt | 10.25690 | 10.16950 | 24.06416 | Pt | 0 | 0 | 0.00000 |
| HETATM | 339 | Pt | 10.26073 | 18.54443 | 24.07593 | Pt | 0 | 0 | 0.00000 |
| HETATM | 340 | Pt | 17.50877 | 31.10727 | 24.07667 | Pt | 0 | 0 | 0.00000 |
| HETATM | 341 | Pt | 17.50843 | 14.35885 | 24.06545 | Pt | 0 | 0 | 0.00000 |
| HETATM | 342 | Pt | 17.51010 | 22.73365 | 24.07265 | Pt | 0 | 0 | 0.00000 |
| HETATM | 343 | Pt | 3.00426  | 25.52280 | 24.07758 | Pt | 0 | 0 | 0.00000 |
| HETATM | 344 | Pt | 3.00696  | 8.77692  | 24.07538 | Pt | 0 | 0 | 0.00000 |
| HETATM | 345 | Pt | 3.00645  | 17.14911 | 24.07644 | Pt | 0 | 0 | 0.00000 |
| HETATM | 346 | Pt | 10.25729 | 29.70875 | 24.07521 | Pt | 0 | 0 | 0.00000 |
| HETATM | 347 | Pt | 10.25566 | 12.96529 | 24.06734 | Pt | 0 | 0 | 0.00000 |
| HETATM | 348 | Pt | 10.25930 | 21.33459 | 24.07807 | Pt | 0 | 0 | 0.00000 |
| HETATM | 349 | Pt | 17.50747 | 33.89874 | 24.07958 | Pt | 0 | 0 | 0.00000 |
| HETATM | 350 | Pt | 17.50804 | 17.15102 | 24.07022 | Pt | 0 | 0 | 0.00000 |
| HETATM | 351 | Pt | 17.50976 | 25.52457 | 24.07451 | Pt | 0 | 0 | 0.00000 |
| HETATM | 352 | Pt | 5.42317  | 21.33516 | 24.07723 | Pt | 0 | 0 | 0.00000 |
| HETATM | 353 | Pt | 5.42195  | 4.58890  | 24.07749 | Pt | 0 | 0 | 0.00000 |
| HETATM | 354 | Pt | 5.42490  | 12.96297 | 24.07667 | Pt | 0 | 0 | 0.00000 |
| HETATM | 355 | Pt | 12.67580 | 25.52328 | 24.07721 | Pt | 0 | 0 | 0.00000 |
| HETATM | 356 | Pt | 12.67355 | 8.77424  | 24.06416 | Pt | 0 | 0 | 0.00000 |
| HETATM | 357 | Pt | 12.67587 | 17.14893 | 24.06545 | Pt | 0 | 0 | 0.00000 |
| HETATM | 358 | Pt | 19.92648 | 29.71094 | 24.07552 | Pt | 0 | 0 | 0.00000 |
| HETATM | 359 | Pt | 19.92454 | 12.96502 | 24.07592 | Pt | 0 | 0 | 0.00000 |
| HETATM | 360 | Pt | 19.92782 | 21.33778 | 24.07265 | Pt | 0 | 0 | 0.00000 |
| HETATM | 361 | Pt | 5.42236  | 24.12625 | 24.07152 | Pt | 0 | 0 | 0.00000 |

|        |     |    |          |          |          |    |   |   |         |
|--------|-----|----|----------|----------|----------|----|---|---|---------|
| HETATM | 362 | Pt | 5.42390  | 7.38132  | 24.07038 | Pt | 0 | 0 | 0.00000 |
| HETATM | 363 | Pt | 5.42454  | 15.75283 | 24.07028 | Pt | 0 | 0 | 0.00000 |
| HETATM | 364 | Pt | 12.67542 | 28.31557 | 24.07038 | Pt | 0 | 0 | 0.00000 |
| HETATM | 365 | Pt | 12.67598 | 11.56896 | 24.05281 | Pt | 0 | 0 | 0.00000 |
| HETATM | 366 | Pt | 12.67623 | 19.94099 | 24.06710 | Pt | 0 | 0 | 0.00000 |
| HETATM | 367 | Pt | 19.92504 | 32.50188 | 24.07028 | Pt | 0 | 0 | 0.00000 |
| HETATM | 368 | Pt | 19.92625 | 15.75520 | 24.06710 | Pt | 0 | 0 | 0.00000 |
| HETATM | 369 | Pt | 19.92737 | 24.12874 | 24.06768 | Pt | 0 | 0 | 0.00000 |
| HETATM | 370 | Pt | 5.42186  | 26.91798 | 24.07753 | Pt | 0 | 0 | 0.00000 |
| HETATM | 371 | Pt | 5.42499  | 10.17316 | 24.07620 | Pt | 0 | 0 | 0.00000 |
| HETATM | 372 | Pt | 5.42379  | 18.54422 | 24.07642 | Pt | 0 | 0 | 0.00000 |
| HETATM | 373 | Pt | 12.67583 | 31.10798 | 24.07618 | Pt | 0 | 0 | 0.00000 |
| HETATM | 374 | Pt | 12.67360 | 14.35584 | 24.06219 | Pt | 0 | 0 | 0.00000 |
| HETATM | 375 | Pt | 12.67638 | 22.73147 | 24.07686 | Pt | 0 | 0 | 0.00000 |
| HETATM | 376 | Pt | 19.92528 | 35.29323 | 24.07543 | Pt | 0 | 0 | 0.00000 |
| HETATM | 377 | Pt | 19.92629 | 18.54623 | 24.07308 | Pt | 0 | 0 | 0.00000 |
| HETATM | 378 | Pt | 19.92703 | 26.91978 | 24.07481 | Pt | 0 | 0 | 0.00000 |
| HETATM | 379 | Pt | 7.84087  | 22.73038 | 24.07758 | Pt | 0 | 0 | 0.00000 |
| HETATM | 380 | Pt | 7.83949  | 5.98375  | 24.07521 | Pt | 0 | 0 | 0.00000 |
| HETATM | 381 | Pt | 7.84304  | 14.35758 | 24.07958 | Pt | 0 | 0 | 0.00000 |
| HETATM | 382 | Pt | 15.09251 | 26.92024 | 24.07538 | Pt | 0 | 0 | 0.00000 |
| HETATM | 383 | Pt | 15.09540 | 10.17106 | 24.06733 | Pt | 0 | 0 | 0.00000 |
| HETATM | 384 | Pt | 15.09416 | 18.54468 | 24.07022 | Pt | 0 | 0 | 0.00000 |
| HETATM | 385 | Pt | 0.58794  | 18.54543 | 24.07644 | Pt | 0 | 0 | 0.00000 |
| HETATM | 386 | Pt | 0.58625  | 1.79841  | 24.07807 | Pt | 0 | 0 | 0.00000 |
| HETATM | 387 | Pt | 0.58964  | 10.17248 | 24.07451 | Pt | 0 | 0 | 0.00000 |
| HETATM | 388 | Pt | 7.84033  | 25.52168 | 24.07753 | Pt | 0 | 0 | 0.00000 |
| HETATM | 389 | Pt | 7.84199  | 8.77788  | 24.07618 | Pt | 0 | 0 | 0.00000 |
| HETATM | 390 | Pt | 7.84180  | 17.14871 | 24.07543 | Pt | 0 | 0 | 0.00000 |
| HETATM | 391 | Pt | 15.09268 | 29.71244 | 24.07620 | Pt | 0 | 0 | 0.00000 |
| HETATM | 392 | Pt | 15.09068 | 12.96034 | 24.06219 | Pt | 0 | 0 | 0.00000 |
| HETATM | 393 | Pt | 15.09332 | 21.33655 | 24.07308 | Pt | 0 | 0 | 0.00000 |
| HETATM | 394 | Pt | 0.58748  | 21.33647 | 24.07642 | Pt | 0 | 0 | 0.00000 |
| HETATM | 395 | Pt | 0.58745  | 4.59010  | 24.07686 | Pt | 0 | 0 | 0.00000 |
| HETATM | 396 | Pt | 0.58930  | 12.96350 | 24.07481 | Pt | 0 | 0 | 0.00000 |
| HETATM | 397 | Pt | 7.83974  | 28.31326 | 24.07093 | Pt | 0 | 0 | 0.00000 |
| HETATM | 398 | Pt | 7.84334  | 11.56906 | 24.07318 | Pt | 0 | 0 | 0.00000 |
| HETATM | 399 | Pt | 7.84140  | 19.93950 | 24.06981 | Pt | 0 | 0 | 0.00000 |
| HETATM | 400 | Pt | 15.09239 | 32.50474 | 24.07318 | Pt | 0 | 0 | 0.00000 |
| HETATM | 401 | Pt | 15.09315 | 15.75563 | 24.05648 | Pt | 0 | 0 | 0.00000 |
| HETATM | 402 | Pt | 15.09272 | 24.12863 | 24.06836 | Pt | 0 | 0 | 0.00000 |
| HETATM | 403 | Pt | 0.58701  | 24.12782 | 24.06981 | Pt | 0 | 0 | 0.00000 |
| HETATM | 404 | Pt | 0.58926  | 7.38130  | 24.06836 | Pt | 0 | 0 | 0.00000 |
| HETATM | 405 | Pt | 0.58889  | 15.75443 | 24.06892 | Pt | 0 | 0 | 0.00000 |
| HETATM | 406 | Pt | 3.80589  | 21.32644 | 26.35410 | Pt | 0 | 0 | 0.00000 |
| HETATM | 407 | Pt | 3.80372  | 4.58131  | 26.35543 | Pt | 0 | 0 | 0.00000 |
| HETATM | 408 | Pt | 3.80995  | 12.95423 | 26.35200 | Pt | 0 | 0 | 0.00000 |
| HETATM | 409 | Pt | 11.06063 | 25.51245 | 26.35543 | Pt | 0 | 0 | 0.00000 |
| HETATM | 410 | Pt | 11.05886 | 8.76803  | 26.33988 | Pt | 0 | 0 | 0.00000 |
| HETATM | 411 | Pt | 11.07362 | 17.13285 | 26.35184 | Pt | 0 | 0 | 0.00000 |
| HETATM | 412 | Pt | 18.30867 | 29.70431 | 26.35199 | Pt | 0 | 0 | 0.00000 |
| HETATM | 413 | Pt | 18.29563 | 12.96322 | 26.35184 | Pt | 0 | 0 | 0.00000 |
| HETATM | 414 | Pt | 18.31151 | 21.32999 | 26.34767 | Pt | 0 | 0 | 0.00000 |
| HETATM | 415 | Pt | 3.81867  | 24.12703 | 26.35551 | Pt | 0 | 0 | 0.00000 |
| HETATM | 416 | Pt | 3.82164  | 7.38184  | 26.35381 | Pt | 0 | 0 | 0.00000 |
| HETATM | 417 | Pt | 3.82416  | 15.75305 | 26.35415 | Pt | 0 | 0 | 0.00000 |
| HETATM | 418 | Pt | 11.07430 | 28.31426 | 26.35431 | Pt | 0 | 0 | 0.00000 |
| HETATM | 419 | Pt | 11.07408 | 11.56571 | 26.31964 | Pt | 0 | 0 | 0.00000 |
| HETATM | 420 | Pt | 11.07967 | 19.93409 | 26.35706 | Pt | 0 | 0 | 0.00000 |
| HETATM | 421 | Pt | 18.32077 | 32.50644 | 26.35527 | Pt | 0 | 0 | 0.00000 |
| HETATM | 422 | Pt | 18.31757 | 15.75347 | 26.34037 | Pt | 0 | 0 | 0.00000 |
| HETATM | 423 | Pt | 18.32609 | 24.12885 | 26.35064 | Pt | 0 | 0 | 0.00000 |
| HETATM | 424 | Pt | 3.80319  | 26.92749 | 26.35497 | Pt | 0 | 0 | 0.00000 |

|        |     |    |          |          |          |    |   |   |         |
|--------|-----|----|----------|----------|----------|----|---|---|---------|
| HETATM | 425 | Pt | 3.80897  | 10.18188 | 26.35147 | Pt | 0 | 0 | 0.00000 |
| HETATM | 426 | Pt | 3.80815  | 18.55260 | 26.35412 | Pt | 0 | 0 | 0.00000 |
| HETATM | 427 | Pt | 11.05834 | 31.11434 | 26.34809 | Pt | 0 | 0 | 0.00000 |
| HETATM | 428 | Pt | 11.05958 | 14.37144 | 26.34289 | Pt | 0 | 0 | 0.00000 |
| HETATM | 429 | Pt | 11.06299 | 22.73433 | 26.35668 | Pt | 0 | 0 | 0.00000 |
| HETATM | 430 | Pt | 18.30651 | 35.30490 | 26.35496 | Pt | 0 | 0 | 0.00000 |
| HETATM | 431 | Pt | 18.30425 | 18.55580 | 26.34581 | Pt | 0 | 0 | 0.00000 |
| HETATM | 432 | Pt | 18.31045 | 26.92918 | 26.35192 | Pt | 0 | 0 | 0.00000 |
| HETATM | 433 | Pt | 6.22489  | 22.73780 | 26.35551 | Pt | 0 | 0 | 0.00000 |
| HETATM | 434 | Pt | 6.22332  | 5.99406  | 26.35431 | Pt | 0 | 0 | 0.00000 |
| HETATM | 435 | Pt | 6.23062  | 14.36577 | 26.35527 | Pt | 0 | 0 | 0.00000 |
| HETATM | 436 | Pt | 13.47700 | 26.92824 | 26.35381 | Pt | 0 | 0 | 0.00000 |
| HETATM | 437 | Pt | 13.47412 | 10.18005 | 26.31964 | Pt | 0 | 0 | 0.00000 |
| HETATM | 438 | Pt | 13.47908 | 18.54697 | 26.34037 | Pt | 0 | 0 | 0.00000 |
| HETATM | 439 | Pt | 20.72542 | 31.11602 | 26.35415 | Pt | 0 | 0 | 0.00000 |
| HETATM | 440 | Pt | 20.71855 | 14.36908 | 26.35706 | Pt | 0 | 0 | 0.00000 |
| HETATM | 441 | Pt | 20.72811 | 22.74204 | 26.35064 | Pt | 0 | 0 | 0.00000 |
| HETATM | 442 | Pt | 6.22290  | 25.51282 | 26.35455 | Pt | 0 | 0 | 0.00000 |
| HETATM | 443 | Pt | 6.22845  | 8.76965  | 26.35251 | Pt | 0 | 0 | 0.00000 |
| HETATM | 444 | Pt | 6.22747  | 17.13839 | 26.35243 | Pt | 0 | 0 | 0.00000 |
| HETATM | 445 | Pt | 13.47547 | 29.70650 | 26.35251 | Pt | 0 | 0 | 0.00000 |
| HETATM | 446 | Pt | 13.48009 | 12.96172 | 26.34572 | Pt | 0 | 0 | 0.00000 |
| HETATM | 447 | Pt | 13.48124 | 21.32303 | 26.35316 | Pt | 0 | 0 | 0.00000 |
| HETATM | 448 | Pt | 20.72350 | 33.89002 | 26.35243 | Pt | 0 | 0 | 0.00000 |
| HETATM | 449 | Pt | 20.72062 | 17.14337 | 26.35316 | Pt | 0 | 0 | 0.00000 |
| HETATM | 450 | Pt | 20.72831 | 25.51601 | 26.35146 | Pt | 0 | 0 | 0.00000 |
| HETATM | 451 | Pt | 6.23698  | 28.31375 | 26.35462 | Pt | 0 | 0 | 0.00000 |
| HETATM | 452 | Pt | 6.24397  | 11.56852 | 26.35605 | Pt | 0 | 0 | 0.00000 |
| HETATM | 453 | Pt | 6.24118  | 19.93825 | 26.35443 | Pt | 0 | 0 | 0.00000 |
| HETATM | 454 | Pt | 13.49274 | 32.51451 | 26.35736 | Pt | 0 | 0 | 0.00000 |
| HETATM | 455 | Pt | 13.49079 | 15.73886 | 26.32726 | Pt | 0 | 0 | 0.00000 |
| HETATM | 456 | Pt | 13.49329 | 24.12461 | 26.35427 | Pt | 0 | 0 | 0.00000 |
| HETATM | 457 | Pt | 20.73598 | 36.69265 | 26.35028 | Pt | 0 | 0 | 0.00000 |
| HETATM | 458 | Pt | 20.74157 | 19.94159 | 26.34924 | Pt | 0 | 0 | 0.00000 |
| HETATM | 459 | Pt | 20.74245 | 28.31618 | 26.35211 | Pt | 0 | 0 | 0.00000 |
| HETATM | 460 | Pt | 8.65790  | 24.12463 | 26.35497 | Pt | 0 | 0 | 0.00000 |
| HETATM | 461 | Pt | 8.65624  | 7.38027  | 26.34809 | Pt | 0 | 0 | 0.00000 |
| HETATM | 462 | Pt | 8.66129  | 15.75265 | 26.35496 | Pt | 0 | 0 | 0.00000 |
| HETATM | 463 | Pt | 15.90824 | 28.31728 | 26.35147 | Pt | 0 | 0 | 0.00000 |
| HETATM | 464 | Pt | 15.91120 | 11.57035 | 26.34289 | Pt | 0 | 0 | 0.00000 |
| HETATM | 465 | Pt | 15.91263 | 19.93660 | 26.34581 | Pt | 0 | 0 | 0.00000 |
| HETATM | 466 | Pt | 1.40255  | 19.94148 | 26.35412 | Pt | 0 | 0 | 0.00000 |
| HETATM | 467 | Pt | 1.39662  | 3.19429  | 26.35668 | Pt | 0 | 0 | 0.00000 |
| HETATM | 468 | Pt | 1.40574  | 11.56820 | 26.35192 | Pt | 0 | 0 | 0.00000 |
| HETATM | 469 | Pt | 8.64154  | 26.92548 | 26.35462 | Pt | 0 | 0 | 0.00000 |
| HETATM | 470 | Pt | 8.65162  | 10.18860 | 26.35736 | Pt | 0 | 0 | 0.00000 |
| HETATM | 471 | Pt | 8.64838  | 18.55050 | 26.35028 | Pt | 0 | 0 | 0.00000 |
| HETATM | 472 | Pt | 15.89160 | 31.11938 | 26.35605 | Pt | 0 | 0 | 0.00000 |
| HETATM | 473 | Pt | 15.87981 | 14.35955 | 26.32726 | Pt | 0 | 0 | 0.00000 |
| HETATM | 474 | Pt | 15.89410 | 22.74028 | 26.34924 | Pt | 0 | 0 | 0.00000 |
| HETATM | 475 | Pt | 1.38604  | 22.74137 | 26.35443 | Pt | 0 | 0 | 0.00000 |
| HETATM | 476 | Pt | 1.38547  | 5.99413  | 26.35427 | Pt | 0 | 0 | 0.00000 |
| HETATM | 477 | Pt | 1.39092  | 14.36788 | 26.35211 | Pt | 0 | 0 | 0.00000 |
| HETATM | 478 | Pt | 8.64126  | 29.70154 | 26.35416 | Pt | 0 | 0 | 0.00000 |
| HETATM | 479 | Pt | 8.65339  | 12.95228 | 26.36784 | Pt | 0 | 0 | 0.00000 |
| HETATM | 480 | Pt | 8.64422  | 21.32355 | 26.35450 | Pt | 0 | 0 | 0.00000 |
| HETATM | 481 | Pt | 15.88527 | 33.89787 | 26.36783 | Pt | 0 | 0 | 0.00000 |
| HETATM | 482 | Pt | 15.89098 | 17.13751 | 26.35466 | Pt | 0 | 0 | 0.00000 |
| HETATM | 483 | Pt | 15.89375 | 25.51574 | 26.35204 | Pt | 0 | 0 | 0.00000 |
| HETATM | 484 | Pt | 1.38422  | 25.51510 | 26.35450 | Pt | 0 | 0 | 0.00000 |
| HETATM | 485 | Pt | 1.39001  | 8.76856  | 26.35204 | Pt | 0 | 0 | 0.00000 |
| HETATM | 486 | Pt | 1.38958  | 17.14125 | 26.35300 | Pt | 0 | 0 | 0.00000 |
| HETATM | 487 | Pt | 2.19976  | 1.81633  | 28.71209 | Pt | 0 | 0 | 0.00000 |

|        |     |    |          |          |          |    |   |   |         |
|--------|-----|----|----------|----------|----------|----|---|---|---------|
| HETATM | 488 | Pt | 2.21312  | 10.18776 | 28.71315 | Pt | 0 | 0 | 0.00000 |
| HETATM | 489 | Pt | 2.21026  | 18.56272 | 28.71165 | Pt | 0 | 0 | 0.00000 |
| HETATM | 490 | Pt | 9.46249  | 6.00304  | 28.71455 | Pt | 0 | 0 | 0.00000 |
| HETATM | 491 | Pt | 9.47180  | 14.37780 | 28.73208 | Pt | 0 | 0 | 0.00000 |
| HETATM | 492 | Pt | 9.46807  | 22.74089 | 28.71209 | Pt | 0 | 0 | 0.00000 |
| HETATM | 493 | Pt | 16.71060 | 10.19848 | 28.73208 | Pt | 0 | 0 | 0.00000 |
| HETATM | 494 | Pt | 16.70643 | 18.54991 | 28.74313 | Pt | 0 | 0 | 0.00000 |
| HETATM | 495 | Pt | 16.71126 | 26.93818 | 28.71315 | Pt | 0 | 0 | 0.00000 |
| HETATM | 496 | Pt | 2.20668  | 21.32232 | 28.71675 | Pt | 0 | 0 | 0.00000 |
| HETATM | 497 | Pt | 2.20103  | 4.57381  | 28.71267 | Pt | 0 | 0 | 0.00000 |
| HETATM | 498 | Pt | 2.21603  | 12.94774 | 28.71119 | Pt | 0 | 0 | 0.00000 |
| HETATM | 499 | Pt | 9.46482  | 25.50242 | 28.71710 | Pt | 0 | 0 | 0.00000 |
| HETATM | 500 | Pt | 9.47628  | 8.76510  | 28.68519 | Pt | 0 | 0 | 0.00000 |
| HETATM | 501 | Pt | 9.50782  | 17.12862 | 28.69686 | Pt | 0 | 0 | 0.00000 |
| HETATM | 502 | Pt | 16.70809 | 29.70082 | 28.71607 | Pt | 0 | 0 | 0.00000 |
| HETATM | 503 | Pt | 16.62544 | 12.94141 | 28.73150 | Pt | 0 | 0 | 0.00000 |
| HETATM | 504 | Pt | 16.70626 | 21.30990 | 28.70062 | Pt | 0 | 0 | 0.00000 |
| HETATM | 505 | Pt | 2.17241  | 24.13001 | 28.71920 | Pt | 0 | 0 | 0.00000 |
| HETATM | 506 | Pt | 2.17625  | 7.37819  | 28.71443 | Pt | 0 | 0 | 0.00000 |
| HETATM | 507 | Pt | 2.18520  | 15.75505 | 28.71566 | Pt | 0 | 0 | 0.00000 |
| HETATM | 508 | Pt | 9.43359  | 28.31314 | 28.71356 | Pt | 0 | 0 | 0.00000 |
| HETATM | 509 | Pt | 9.49185  | 11.57224 | 28.78325 | Pt | 0 | 0 | 0.00000 |
| HETATM | 510 | Pt | 9.44589  | 19.93472 | 28.71683 | Pt | 0 | 0 | 0.00000 |
| HETATM | 511 | Pt | 16.66587 | 32.51812 | 28.71993 | Pt | 0 | 0 | 0.00000 |
| HETATM | 512 | Pt | 16.62093 | 15.65735 | 28.68541 | Pt | 0 | 0 | 0.00000 |
| HETATM | 513 | Pt | 16.68529 | 24.12341 | 28.70950 | Pt | 0 | 0 | 0.00000 |
| HETATM | 514 | Pt | 4.59294  | 3.19428  | 28.71710 | Pt | 0 | 0 | 0.00000 |
| HETATM | 515 | Pt | 4.60723  | 11.56634 | 28.71607 | Pt | 0 | 0 | 0.00000 |
| HETATM | 516 | Pt | 4.60193  | 19.93942 | 28.71675 | Pt | 0 | 0 | 0.00000 |
| HETATM | 517 | Pt | 11.84761 | 7.39601  | 28.68519 | Pt | 0 | 0 | 0.00000 |
| HETATM | 518 | Pt | 11.88983 | 15.67551 | 28.73151 | Pt | 0 | 0 | 0.00000 |
| HETATM | 519 | Pt | 11.85548 | 24.12073 | 28.71267 | Pt | 0 | 0 | 0.00000 |
| HETATM | 520 | Pt | 19.07487 | 11.60508 | 28.69686 | Pt | 0 | 0 | 0.00000 |
| HETATM | 521 | Pt | 19.09674 | 19.92976 | 28.70062 | Pt | 0 | 0 | 0.00000 |
| HETATM | 522 | Pt | 19.10002 | 28.32068 | 28.71119 | Pt | 0 | 0 | 0.00000 |
| HETATM | 523 | Pt | 4.62603  | 22.74695 | 28.71234 | Pt | 0 | 0 | 0.00000 |
| HETATM | 524 | Pt | 4.62581  | 6.00455  | 28.71720 | Pt | 0 | 0 | 0.00000 |
| HETATM | 525 | Pt | 4.64220  | 14.37151 | 28.71082 | Pt | 0 | 0 | 0.00000 |
| HETATM | 526 | Pt | 11.88214 | 26.93602 | 28.71720 | Pt | 0 | 0 | 0.00000 |
| HETATM | 527 | Pt | 11.85887 | 10.15369 | 28.57323 | Pt | 0 | 0 | 0.00000 |
| HETATM | 528 | Pt | 11.89202 | 18.54062 | 28.72190 | Pt | 0 | 0 | 0.00000 |
| HETATM | 529 | Pt | 19.11995 | 31.13370 | 28.71082 | Pt | 0 | 0 | 0.00000 |
| HETATM | 530 | Pt | 19.10560 | 14.37586 | 28.72190 | Pt | 0 | 0 | 0.00000 |
| HETATM | 531 | Pt | 19.12911 | 22.74611 | 28.71396 | Pt | 0 | 0 | 0.00000 |
| HETATM | 532 | Pt | 4.62397  | 25.50650 | 28.71594 | Pt | 0 | 0 | 0.00000 |
| HETATM | 533 | Pt | 4.63517  | 8.76529  | 28.70851 | Pt | 0 | 0 | 0.00000 |
| HETATM | 534 | Pt | 4.63558  | 17.13110 | 28.71593 | Pt | 0 | 0 | 0.00000 |
| HETATM | 535 | Pt | 11.87763 | 29.69857 | 28.71617 | Pt | 0 | 0 | 0.00000 |
| HETATM | 536 | Pt | 11.91238 | 12.97931 | 28.66264 | Pt | 0 | 0 | 0.00000 |
| HETATM | 537 | Pt | 11.89772 | 21.30245 | 28.72194 | Pt | 0 | 0 | 0.00000 |
| HETATM | 538 | Pt | 19.12346 | 33.89574 | 28.72006 | Pt | 0 | 0 | 0.00000 |
| HETATM | 539 | Pt | 19.07319 | 17.11167 | 28.68462 | Pt | 0 | 0 | 0.00000 |
| HETATM | 540 | Pt | 19.13000 | 25.50790 | 28.71244 | Pt | 0 | 0 | 0.00000 |
| HETATM | 541 | Pt | 7.04271  | 4.57260  | 28.71356 | Pt | 0 | 0 | 0.00000 |
| HETATM | 542 | Pt | 7.06819  | 12.93842 | 28.71993 | Pt | 0 | 0 | 0.00000 |
| HETATM | 543 | Pt | 7.05060  | 21.31358 | 28.71920 | Pt | 0 | 0 | 0.00000 |
| HETATM | 544 | Pt | 14.27089 | 8.81306  | 28.78325 | Pt | 0 | 0 | 0.00000 |
| HETATM | 545 | Pt | 14.24416 | 17.02958 | 28.68541 | Pt | 0 | 0 | 0.00000 |
| HETATM | 546 | Pt | 14.29653 | 25.50146 | 28.71443 | Pt | 0 | 0 | 0.00000 |
| HETATM | 547 | Pt | 21.53599 | 12.95450 | 28.71683 | Pt | 0 | 0 | 0.00000 |
| HETATM | 548 | Pt | 21.54380 | 21.31835 | 28.70950 | Pt | 0 | 0 | 0.00000 |
| HETATM | 549 | Pt | 21.54663 | 29.69764 | 28.71566 | Pt | 0 | 0 | 0.00000 |
| HETATM | 550 | Pt | 7.01689  | 24.12494 | 28.71594 | Pt | 0 | 0 | 0.00000 |

|        |     |    |          |          |          |    |   |   |         |
|--------|-----|----|----------|----------|----------|----|---|---|---------|
| HETATM | 551 | Pt | 7.02050  | 7.38192  | 28.71617 | Pt | 0 | 0 | 0.00000 |
| HETATM | 552 | Pt | 7.03245  | 15.75557 | 28.72006 | Pt | 0 | 0 | 0.00000 |
| HETATM | 553 | Pt | 14.26833 | 28.32450 | 28.70851 | Pt | 0 | 0 | 0.00000 |
| HETATM | 554 | Pt | 14.27918 | 11.61284 | 28.66264 | Pt | 0 | 0 | 0.00000 |
| HETATM | 555 | Pt | 14.27750 | 19.88046 | 28.68462 | Pt | 0 | 0 | 0.00000 |
| HETATM | 556 | Pt | 21.51314 | 32.50775 | 28.71593 | Pt | 0 | 0 | 0.00000 |
| HETATM | 557 | Pt | 21.49456 | 15.76172 | 28.72194 | Pt | 0 | 0 | 0.00000 |
| HETATM | 558 | Pt | 21.52045 | 24.12778 | 28.71244 | Pt | 0 | 0 | 0.00000 |
| HETATM | 559 | Pt | 7.04319  | 26.93360 | 28.71405 | Pt | 0 | 0 | 0.00000 |
| HETATM | 560 | Pt | 7.07394  | 10.19301 | 28.71352 | Pt | 0 | 0 | 0.00000 |
| HETATM | 561 | Pt | 7.06081  | 18.55273 | 28.70629 | Pt | 0 | 0 | 0.00000 |
| HETATM | 562 | Pt | 14.28539 | 31.15040 | 28.71352 | Pt | 0 | 0 | 0.00000 |
| HETATM | 563 | Pt | 14.25350 | 14.30130 | 29.84824 | Pt | 0 | 0 | 0.00000 |
| HETATM | 564 | Pt | 14.30061 | 22.73280 | 28.72059 | Pt | 0 | 0 | 0.00000 |
| HETATM | 565 | Pt | 21.53169 | 35.31889 | 28.70629 | Pt | 0 | 0 | 0.00000 |
| HETATM | 566 | Pt | 21.53183 | 18.55785 | 28.72059 | Pt | 0 | 0 | 0.00000 |
| HETATM | 567 | Pt | 21.54893 | 26.93735 | 28.71172 | Pt | 0 | 0 | 0.00000 |
| HETATM | 568 | O  | 3.00444  | 19.93827 | 29.83582 | O  | 0 | 0 | 0.00000 |
| HETATM | 569 | O  | 2.99414  | 3.19522  | 29.83514 | O  | 0 | 0 | 0.00000 |
| HETATM | 570 | O  | 3.00924  | 11.56920 | 29.83437 | O  | 0 | 0 | 0.00000 |
| HETATM | 571 | O  | 10.26503 | 24.11828 | 29.83514 | O  | 0 | 0 | 0.00000 |
| HETATM | 572 | O  | 10.27271 | 7.40638  | 29.81732 | O  | 0 | 0 | 0.00000 |
| HETATM | 573 | O  | 10.29980 | 15.76060 | 29.83373 | O  | 0 | 0 | 0.00000 |
| HETATM | 574 | O  | 17.50956 | 28.31835 | 29.83437 | O  | 0 | 0 | 0.00000 |
| HETATM | 575 | O  | 17.49414 | 11.60695 | 29.83373 | O  | 0 | 0 | 0.00000 |
| HETATM | 576 | O  | 17.51276 | 19.94651 | 29.83403 | O  | 0 | 0 | 0.00000 |
| HETATM | 577 | O  | 5.42089  | 24.12370 | 29.83581 | O  | 0 | 0 | 0.00000 |
| HETATM | 578 | O  | 5.42546  | 7.38849  | 29.83508 | O  | 0 | 0 | 0.00000 |
| HETATM | 579 | O  | 5.43166  | 15.74794 | 29.83635 | O  | 0 | 0 | 0.00000 |
| HETATM | 580 | O  | 12.68085 | 28.32051 | 29.83508 | O  | 0 | 0 | 0.00000 |
| HETATM | 581 | O  | 13.23817 | 12.54270 | 29.99157 | O  | 0 | 0 | 0.00000 |
| HETATM | 582 | O  | 12.70434 | 19.90081 | 29.83056 | O  | 0 | 0 | 0.00000 |
| HETATM | 583 | O  | 19.91724 | 32.50561 | 29.83634 | O  | 0 | 0 | 0.00000 |
| HETATM | 584 | O  | 19.87740 | 15.75945 | 29.83056 | O  | 0 | 0 | 0.00000 |
| HETATM | 585 | O  | 19.92730 | 24.12861 | 29.83389 | O  | 0 | 0 | 0.00000 |
| HETATM | 586 | O  | 7.84006  | 28.31381 | 29.83498 | O  | 0 | 0 | 0.00000 |
| HETATM | 587 | O  | 7.82429  | 11.56159 | 29.85642 | O  | 0 | 0 | 0.00000 |
| HETATM | 588 | O  | 7.85185  | 19.92533 | 29.83507 | O  | 0 | 0 | 0.00000 |
| HETATM | 589 | O  | 15.09545 | 32.48451 | 29.85642 | O  | 0 | 0 | 0.00000 |
| HETATM | 590 | O  | 15.27150 | 16.06453 | 30.00104 | O  | 0 | 0 | 0.00000 |
| HETATM | 591 | O  | 15.09831 | 24.12480 | 29.83524 | O  | 0 | 0 | 0.00000 |
| HETATM | 592 | O  | 0.56953  | 24.12979 | 29.83507 | O  | 0 | 0 | 0.00000 |
| HETATM | 593 | O  | 0.58313  | 7.38422  | 29.83524 | O  | 0 | 0 | 0.00000 |
| HETATM | 594 | O  | 0.58867  | 15.75403 | 29.83516 | O  | 0 | 0 | 0.00000 |

UNIT ENERGY kcal

ENERGY -75147.422554

END
