# Supplementary material for: Development of a ReaxFF potential for Pt–O systems describing the energetics and dynamics of Pt-oxide formation
Source: Royal Society of Chemistry journal article supplement (doi:10.1039/c4cp03111c), 2014-01-01
Supplement: c4cp03111c1.zip [file c4cp03111c1.zip]

```

XTLGRF 200
DESCRP IS
REMARK Pt111_0.11ML_9x9x7_30.0_vac hcp-displacement
FIXATOMS 1 162
CRYSTX 25.12092 25.12092 43.67409 90.00000 90.00000 60.00000
FORMAT ATOM (a6,lx,i5,lx,a5,lx,a3,lx,a1,lx,a5,3f10.5,lx,a5,i3,i2,lx,f8.5)
HETATM 1 Pt 2.20377 19.74305 14.98634 Pt 0 0 0.00000
HETATM 2 Pt 2.20377 2.99577 14.98634 Pt 0 0 0.00000
HETATM 3 Pt 2.20377 11.36941 14.98634 Pt 0 0 0.00000
HETATM 4 Pt 9.45555 23.92987 14.98634 Pt 0 0 0.00000
HETATM 5 Pt 9.45555 7.18259 14.98634 Pt 0 0 0.00000
HETATM 6 Pt 9.45555 15.55623 14.98634 Pt 0 0 0.00000
HETATM 7 Pt 16.70734 28.11669 14.98634 Pt 0 0 0.00000
HETATM 8 Pt 16.70734 11.36941 14.98634 Pt 0 0 0.00000
HETATM 9 Pt 16.70734 19.74305 14.98634 Pt 0 0 0.00000
HETATM 10 Pt 2.20377 22.53426 14.98634 Pt 0 0 0.00000
HETATM 11 Pt 2.20377 5.78698 14.98634 Pt 0 0 0.00000
HETATM 12 Pt 2.20377 14.16062 14.98634 Pt 0 0 0.00000
HETATM 13 Pt 9.45555 26.72108 14.98634 Pt 0 0 0.00000
HETATM 14 Pt 9.45555 9.97380 14.98634 Pt 0 0 0.00000
HETATM 15 Pt 9.45555 18.34744 14.98634 Pt 0 0 0.00000
HETATM 16 Pt 16.70734 30.90790 14.98634 Pt 0 0 0.00000
HETATM 17 Pt 16.70734 14.16062 14.98634 Pt 0 0 0.00000
HETATM 18 Pt 16.70734 22.53426 14.98634 Pt 0 0 0.00000
HETATM 19 Pt 2.20377 25.32547 14.98634 Pt 0 0 0.00000
HETATM 20 Pt 2.20377 8.57819 14.98634 Pt 0 0 0.00000
HETATM 21 Pt 2.20377 16.95183 14.98634 Pt 0 0 0.00000
HETATM 22 Pt 9.45555 29.51229 14.98634 Pt 0 0 0.00000
HETATM 23 Pt 9.45555 12.76501 14.98634 Pt 0 0 0.00000
HETATM 24 Pt 9.45555 21.13865 14.98634 Pt 0 0 0.00000
HETATM 25 Pt 16.70734 33.69911 14.98634 Pt 0 0 0.00000
HETATM 26 Pt 16.70734 16.95183 14.98634 Pt 0 0 0.00000
HETATM 27 Pt 16.70734 25.32547 14.98634 Pt 0 0 0.00000
HETATM 28 Pt 4.62103 21.13866 14.98634 Pt 0 0 0.00000
HETATM 29 Pt 4.62103 4.39138 14.98634 Pt 0 0 0.00000
HETATM 30 Pt 4.62103 12.76502 14.98634 Pt 0 0 0.00000
HETATM 31 Pt 11.87281 25.32548 14.98634 Pt 0 0 0.00000
HETATM 32 Pt 11.87281 8.57820 14.98634 Pt 0 0 0.00000
HETATM 33 Pt 11.87281 16.95184 14.98634 Pt 0 0 0.00000
HETATM 34 Pt 19.12460 29.51230 14.98634 Pt 0 0 0.00000
HETATM 35 Pt 19.12460 12.76502 14.98634 Pt 0 0 0.00000
HETATM 36 Pt 19.12460 21.13866 14.98634 Pt 0 0 0.00000
HETATM 37 Pt 4.62103 23.92987 14.98634 Pt 0 0 0.00000
HETATM 38 Pt 4.62103 7.18259 14.98634 Pt 0 0 0.00000
HETATM 39 Pt 4.62103 15.55623 14.98634 Pt 0 0 0.00000
HETATM 40 Pt 11.87281 28.11669 14.98634 Pt 0 0 0.00000
HETATM 41 Pt 11.87281 11.36941 14.98634 Pt 0 0 0.00000
HETATM 42 Pt 11.87281 19.74305 14.98634 Pt 0 0 0.00000
HETATM 43 Pt 19.12460 32.30351 14.98634 Pt 0 0 0.00000
HETATM 44 Pt 19.12460 15.55623 14.98634 Pt 0 0 0.00000
HETATM 45 Pt 19.12460 23.92987 14.98634 Pt 0 0 0.00000
HETATM 46 Pt 4.62103 26.72108 14.98634 Pt 0 0 0.00000
HETATM 47 Pt 4.62103 9.97380 14.98634 Pt 0 0 0.00000
HETATM 48 Pt 4.62103 18.34744 14.98634 Pt 0 0 0.00000
HETATM 49 Pt 11.87281 30.90790 14.98634 Pt 0 0 0.00000
HETATM 50 Pt 11.87281 14.16062 14.98634 Pt 0 0 0.00000
HETATM 51 Pt 11.87281 22.53426 14.98634 Pt 0 0 0.00000
HETATM 52 Pt 19.12460 35.09472 14.98634 Pt 0 0 0.00000
HETATM 53 Pt 19.12460 18.34744 14.98634 Pt 0 0 0.00000
HETATM 54 Pt 19.12460 26.72108 14.98634 Pt 0 0 0.00000
HETATM 55 Pt 7.03829 22.53426 14.98634 Pt 0 0 0.00000
HETATM 56 Pt 7.03829 5.78698 14.98634 Pt 0 0 0.00000
HETATM 57 Pt 7.03829 14.16062 14.98634 Pt 0 0 0.00000

```

|        |     |    |          |          |          |    |   |   |         |
|--------|-----|----|----------|----------|----------|----|---|---|---------|
| HETATM | 58  | Pt | 14.29007 | 26.72108 | 14.98634 | Pt | 0 | 0 | 0.00000 |
| HETATM | 59  | Pt | 14.29007 | 9.97380  | 14.98634 | Pt | 0 | 0 | 0.00000 |
| HETATM | 60  | Pt | 14.29007 | 18.34744 | 14.98634 | Pt | 0 | 0 | 0.00000 |
| HETATM | 61  | Pt | 21.54186 | 30.90790 | 14.98634 | Pt | 0 | 0 | 0.00000 |
| HETATM | 62  | Pt | 21.54186 | 14.16062 | 14.98634 | Pt | 0 | 0 | 0.00000 |
| HETATM | 63  | Pt | 21.54186 | 22.53426 | 14.98634 | Pt | 0 | 0 | 0.00000 |
| HETATM | 64  | Pt | 7.03829  | 25.32547 | 14.98634 | Pt | 0 | 0 | 0.00000 |
| HETATM | 65  | Pt | 7.03829  | 8.57819  | 14.98634 | Pt | 0 | 0 | 0.00000 |
| HETATM | 66  | Pt | 7.03829  | 16.95183 | 14.98634 | Pt | 0 | 0 | 0.00000 |
| HETATM | 67  | Pt | 14.29007 | 29.51229 | 14.98634 | Pt | 0 | 0 | 0.00000 |
| HETATM | 68  | Pt | 14.29007 | 12.76501 | 14.98634 | Pt | 0 | 0 | 0.00000 |
| HETATM | 69  | Pt | 14.29007 | 21.13865 | 14.98634 | Pt | 0 | 0 | 0.00000 |
| HETATM | 70  | Pt | 21.54186 | 33.69911 | 14.98634 | Pt | 0 | 0 | 0.00000 |
| HETATM | 71  | Pt | 21.54186 | 16.95183 | 14.98634 | Pt | 0 | 0 | 0.00000 |
| HETATM | 72  | Pt | 21.54186 | 25.32547 | 14.98634 | Pt | 0 | 0 | 0.00000 |
| HETATM | 73  | Pt | 7.03829  | 28.11669 | 14.98634 | Pt | 0 | 0 | 0.00000 |
| HETATM | 74  | Pt | 7.03829  | 11.36941 | 14.98634 | Pt | 0 | 0 | 0.00000 |
| HETATM | 75  | Pt | 7.03829  | 19.74305 | 14.98634 | Pt | 0 | 0 | 0.00000 |
| HETATM | 76  | Pt | 14.29007 | 32.30351 | 14.98634 | Pt | 0 | 0 | 0.00000 |
| HETATM | 77  | Pt | 14.29007 | 15.55623 | 14.98634 | Pt | 0 | 0 | 0.00000 |
| HETATM | 78  | Pt | 14.29007 | 23.92987 | 14.98634 | Pt | 0 | 0 | 0.00000 |
| HETATM | 79  | Pt | 21.54186 | 36.49033 | 14.98634 | Pt | 0 | 0 | 0.00000 |
| HETATM | 80  | Pt | 21.54186 | 19.74305 | 14.98634 | Pt | 0 | 0 | 0.00000 |
| HETATM | 81  | Pt | 21.54186 | 28.11669 | 14.98634 | Pt | 0 | 0 | 0.00000 |
| HETATM | 82  | Pt | 3.00952  | 21.13866 | 17.26536 | Pt | 0 | 0 | 0.00000 |
| HETATM | 83  | Pt | 3.00952  | 4.39138  | 17.26536 | Pt | 0 | 0 | 0.00000 |
| HETATM | 84  | Pt | 3.00952  | 12.76502 | 17.26536 | Pt | 0 | 0 | 0.00000 |
| HETATM | 85  | Pt | 10.26130 | 25.32548 | 17.26536 | Pt | 0 | 0 | 0.00000 |
| HETATM | 86  | Pt | 10.26130 | 8.57820  | 17.26536 | Pt | 0 | 0 | 0.00000 |
| HETATM | 87  | Pt | 10.26130 | 16.95184 | 17.26536 | Pt | 0 | 0 | 0.00000 |
| HETATM | 88  | Pt | 17.51309 | 29.51230 | 17.26536 | Pt | 0 | 0 | 0.00000 |
| HETATM | 89  | Pt | 17.51309 | 12.76502 | 17.26536 | Pt | 0 | 0 | 0.00000 |
| HETATM | 90  | Pt | 17.51309 | 21.13866 | 17.26536 | Pt | 0 | 0 | 0.00000 |
| HETATM | 91  | Pt | 3.00952  | 23.92987 | 17.26536 | Pt | 0 | 0 | 0.00000 |
| HETATM | 92  | Pt | 3.00952  | 7.18259  | 17.26536 | Pt | 0 | 0 | 0.00000 |
| HETATM | 93  | Pt | 3.00952  | 15.55623 | 17.26536 | Pt | 0 | 0 | 0.00000 |
| HETATM | 94  | Pt | 10.26130 | 28.11669 | 17.26536 | Pt | 0 | 0 | 0.00000 |
| HETATM | 95  | Pt | 10.26130 | 11.36941 | 17.26536 | Pt | 0 | 0 | 0.00000 |
| HETATM | 96  | Pt | 10.26130 | 19.74305 | 17.26536 | Pt | 0 | 0 | 0.00000 |
| HETATM | 97  | Pt | 17.51309 | 32.30351 | 17.26536 | Pt | 0 | 0 | 0.00000 |
| HETATM | 98  | Pt | 17.51309 | 15.55623 | 17.26536 | Pt | 0 | 0 | 0.00000 |
| HETATM | 99  | Pt | 17.51309 | 23.92987 | 17.26536 | Pt | 0 | 0 | 0.00000 |
| HETATM | 100 | Pt | 3.00952  | 26.72108 | 17.26536 | Pt | 0 | 0 | 0.00000 |
| HETATM | 101 | Pt | 3.00952  | 9.97380  | 17.26536 | Pt | 0 | 0 | 0.00000 |
| HETATM | 102 | Pt | 3.00952  | 18.34744 | 17.26536 | Pt | 0 | 0 | 0.00000 |
| HETATM | 103 | Pt | 10.26130 | 30.90790 | 17.26536 | Pt | 0 | 0 | 0.00000 |
| HETATM | 104 | Pt | 10.26130 | 14.16062 | 17.26536 | Pt | 0 | 0 | 0.00000 |
| HETATM | 105 | Pt | 10.26130 | 22.53426 | 17.26536 | Pt | 0 | 0 | 0.00000 |
| HETATM | 106 | Pt | 17.51309 | 35.09472 | 17.26536 | Pt | 0 | 0 | 0.00000 |
| HETATM | 107 | Pt | 17.51309 | 18.34744 | 17.26536 | Pt | 0 | 0 | 0.00000 |
| HETATM | 108 | Pt | 17.51309 | 26.72108 | 17.26536 | Pt | 0 | 0 | 0.00000 |
| HETATM | 109 | Pt | 5.42678  | 22.53426 | 17.26536 | Pt | 0 | 0 | 0.00000 |
| HETATM | 110 | Pt | 5.42678  | 5.78698  | 17.26536 | Pt | 0 | 0 | 0.00000 |
| HETATM | 111 | Pt | 5.42678  | 14.16062 | 17.26536 | Pt | 0 | 0 | 0.00000 |
| HETATM | 112 | Pt | 12.67856 | 26.72108 | 17.26536 | Pt | 0 | 0 | 0.00000 |
| HETATM | 113 | Pt | 12.67856 | 9.97380  | 17.26536 | Pt | 0 | 0 | 0.00000 |
| HETATM | 114 | Pt | 12.67856 | 18.34744 | 17.26536 | Pt | 0 | 0 | 0.00000 |
| HETATM | 115 | Pt | 19.93035 | 30.90790 | 17.26536 | Pt | 0 | 0 | 0.00000 |
| HETATM | 116 | Pt | 19.93035 | 14.16062 | 17.26536 | Pt | 0 | 0 | 0.00000 |
| HETATM | 117 | Pt | 19.93035 | 22.53426 | 17.26536 | Pt | 0 | 0 | 0.00000 |
| HETATM | 118 | Pt | 5.42678  | 25.32547 | 17.26536 | Pt | 0 | 0 | 0.00000 |
| HETATM | 119 | Pt | 5.42678  | 8.57819  | 17.26536 | Pt | 0 | 0 | 0.00000 |
| HETATM | 120 | Pt | 5.42678  | 16.95183 | 17.26536 | Pt | 0 | 0 | 0.00000 |

|        |     |    |          |          |          |    |   |   |         |
|--------|-----|----|----------|----------|----------|----|---|---|---------|
| HETATM | 121 | Pt | 12.67856 | 29.51229 | 17.26536 | Pt | 0 | 0 | 0.00000 |
| HETATM | 122 | Pt | 12.67856 | 12.76501 | 17.26536 | Pt | 0 | 0 | 0.00000 |
| HETATM | 123 | Pt | 12.67856 | 21.13865 | 17.26536 | Pt | 0 | 0 | 0.00000 |
| HETATM | 124 | Pt | 19.93035 | 33.69911 | 17.26536 | Pt | 0 | 0 | 0.00000 |
| HETATM | 125 | Pt | 19.93035 | 16.95183 | 17.26536 | Pt | 0 | 0 | 0.00000 |
| HETATM | 126 | Pt | 19.93035 | 25.32547 | 17.26536 | Pt | 0 | 0 | 0.00000 |
| HETATM | 127 | Pt | 5.42678  | 28.11669 | 17.26536 | Pt | 0 | 0 | 0.00000 |
| HETATM | 128 | Pt | 5.42678  | 11.36941 | 17.26536 | Pt | 0 | 0 | 0.00000 |
| HETATM | 129 | Pt | 5.42678  | 19.74305 | 17.26536 | Pt | 0 | 0 | 0.00000 |
| HETATM | 130 | Pt | 12.67856 | 32.30351 | 17.26536 | Pt | 0 | 0 | 0.00000 |
| HETATM | 131 | Pt | 12.67856 | 15.55623 | 17.26536 | Pt | 0 | 0 | 0.00000 |
| HETATM | 132 | Pt | 12.67856 | 23.92987 | 17.26536 | Pt | 0 | 0 | 0.00000 |
| HETATM | 133 | Pt | 19.93035 | 36.49033 | 17.26536 | Pt | 0 | 0 | 0.00000 |
| HETATM | 134 | Pt | 19.93035 | 19.74305 | 17.26536 | Pt | 0 | 0 | 0.00000 |
| HETATM | 135 | Pt | 19.93035 | 28.11669 | 17.26536 | Pt | 0 | 0 | 0.00000 |
| HETATM | 136 | Pt | 7.84404  | 23.92987 | 17.26536 | Pt | 0 | 0 | 0.00000 |
| HETATM | 137 | Pt | 7.84404  | 7.18259  | 17.26536 | Pt | 0 | 0 | 0.00000 |
| HETATM | 138 | Pt | 7.84404  | 15.55623 | 17.26536 | Pt | 0 | 0 | 0.00000 |
| HETATM | 139 | Pt | 15.09582 | 28.11669 | 17.26536 | Pt | 0 | 0 | 0.00000 |
| HETATM | 140 | Pt | 15.09582 | 11.36941 | 17.26536 | Pt | 0 | 0 | 0.00000 |
| HETATM | 141 | Pt | 15.09582 | 19.74305 | 17.26536 | Pt | 0 | 0 | 0.00000 |
| HETATM | 142 | Pt | 0.59226  | 19.74305 | 17.26536 | Pt | 0 | 0 | 0.00000 |
| HETATM | 143 | Pt | 0.59226  | 2.99577  | 17.26536 | Pt | 0 | 0 | 0.00000 |
| HETATM | 144 | Pt | 0.59226  | 11.36941 | 17.26536 | Pt | 0 | 0 | 0.00000 |
| HETATM | 145 | Pt | 7.84404  | 26.72108 | 17.26536 | Pt | 0 | 0 | 0.00000 |
| HETATM | 146 | Pt | 7.84404  | 9.97380  | 17.26536 | Pt | 0 | 0 | 0.00000 |
| HETATM | 147 | Pt | 7.84404  | 18.34744 | 17.26536 | Pt | 0 | 0 | 0.00000 |
| HETATM | 148 | Pt | 15.09582 | 30.90790 | 17.26536 | Pt | 0 | 0 | 0.00000 |
| HETATM | 149 | Pt | 15.09582 | 14.16062 | 17.26536 | Pt | 0 | 0 | 0.00000 |
| HETATM | 150 | Pt | 15.09582 | 22.53426 | 17.26536 | Pt | 0 | 0 | 0.00000 |
| HETATM | 151 | Pt | 0.59226  | 22.53426 | 17.26536 | Pt | 0 | 0 | 0.00000 |
| HETATM | 152 | Pt | 0.59226  | 5.78698  | 17.26536 | Pt | 0 | 0 | 0.00000 |
| HETATM | 153 | Pt | 0.59226  | 14.16062 | 17.26536 | Pt | 0 | 0 | 0.00000 |
| HETATM | 154 | Pt | 7.84404  | 29.51229 | 17.26536 | Pt | 0 | 0 | 0.00000 |
| HETATM | 155 | Pt | 7.84404  | 12.76501 | 17.26536 | Pt | 0 | 0 | 0.00000 |
| HETATM | 156 | Pt | 7.84404  | 21.13865 | 17.26536 | Pt | 0 | 0 | 0.00000 |
| HETATM | 157 | Pt | 15.09582 | 33.69911 | 17.26536 | Pt | 0 | 0 | 0.00000 |
| HETATM | 158 | Pt | 15.09582 | 16.95183 | 17.26536 | Pt | 0 | 0 | 0.00000 |
| HETATM | 159 | Pt | 15.09582 | 25.32547 | 17.26536 | Pt | 0 | 0 | 0.00000 |
| HETATM | 160 | Pt | 0.59226  | 25.32547 | 17.26536 | Pt | 0 | 0 | 0.00000 |
| HETATM | 161 | Pt | 0.59226  | 8.57819  | 17.26536 | Pt | 0 | 0 | 0.00000 |
| HETATM | 162 | Pt | 0.59226  | 16.95183 | 17.26536 | Pt | 0 | 0 | 0.00000 |
| HETATM | 163 | Pt | 3.81515  | 22.53404 | 19.54478 | Pt | 0 | 0 | 0.00000 |
| HETATM | 164 | Pt | 3.81514  | 5.78676  | 19.54471 | Pt | 0 | 0 | 0.00000 |
| HETATM | 165 | Pt | 3.81516  | 14.16040 | 19.54474 | Pt | 0 | 0 | 0.00000 |
| HETATM | 166 | Pt | 11.06694 | 26.72087 | 19.54469 | Pt | 0 | 0 | 0.00000 |
| HETATM | 167 | Pt | 11.06694 | 9.97358  | 19.54476 | Pt | 0 | 0 | 0.00000 |
| HETATM | 168 | Pt | 11.06693 | 18.34722 | 19.54474 | Pt | 0 | 0 | 0.00000 |
| HETATM | 169 | Pt | 18.31871 | 30.90769 | 19.54474 | Pt | 0 | 0 | 0.00000 |
| HETATM | 170 | Pt | 18.31873 | 14.16040 | 19.54472 | Pt | 0 | 0 | 0.00000 |
| HETATM | 171 | Pt | 18.31872 | 22.53402 | 19.54473 | Pt | 0 | 0 | 0.00000 |
| HETATM | 172 | Pt | 3.81536  | 25.32546 | 19.54367 | Pt | 0 | 0 | 0.00000 |
| HETATM | 173 | Pt | 3.81536  | 8.57819  | 19.54363 | Pt | 0 | 0 | 0.00000 |
| HETATM | 174 | Pt | 3.81536  | 16.95184 | 19.54366 | Pt | 0 | 0 | 0.00000 |
| HETATM | 175 | Pt | 11.06715 | 29.51231 | 19.54363 | Pt | 0 | 0 | 0.00000 |
| HETATM | 176 | Pt | 11.06715 | 12.76501 | 19.54365 | Pt | 0 | 0 | 0.00000 |
| HETATM | 177 | Pt | 11.06713 | 21.13863 | 19.54362 | Pt | 0 | 0 | 0.00000 |
| HETATM | 178 | Pt | 18.31892 | 33.69912 | 19.54362 | Pt | 0 | 0 | 0.00000 |
| HETATM | 179 | Pt | 18.31893 | 16.95183 | 19.54365 | Pt | 0 | 0 | 0.00000 |
| HETATM | 180 | Pt | 18.31895 | 25.32546 | 19.54364 | Pt | 0 | 0 | 0.00000 |
| HETATM | 181 | Pt | 3.81516  | 2.99597  | 19.54474 | Pt | 0 | 0 | 0.00000 |
| HETATM | 182 | Pt | 3.81515  | 11.36961 | 19.54474 | Pt | 0 | 0 | 0.00000 |
| HETATM | 183 | Pt | 3.81515  | 19.74327 | 19.54476 | Pt | 0 | 0 | 0.00000 |

|        |     |    |          |          |          |    |   |   |         |
|--------|-----|----|----------|----------|----------|----|---|---|---------|
| HETATM | 184 | Pt | 11.06693 | 7.18281  | 19.54476 | Pt | 0 | 0 | 0.00000 |
| HETATM | 185 | Pt | 11.06694 | 15.55645 | 19.54473 | Pt | 0 | 0 | 0.00000 |
| HETATM | 186 | Pt | 11.06692 | 23.93007 | 19.54470 | Pt | 0 | 0 | 0.00000 |
| HETATM | 187 | Pt | 18.31872 | 11.36963 | 19.54471 | Pt | 0 | 0 | 0.00000 |
| HETATM | 188 | Pt | 18.31872 | 19.74325 | 19.54476 | Pt | 0 | 0 | 0.00000 |
| HETATM | 189 | Pt | 18.31873 | 28.11691 | 19.54472 | Pt | 0 | 0 | 0.00000 |
| HETATM | 190 | Pt | 6.23248  | 23.92993 | 19.54366 | Pt | 0 | 0 | 0.00000 |
| HETATM | 191 | Pt | 6.23250  | 7.18267  | 19.54364 | Pt | 0 | 0 | 0.00000 |
| HETATM | 192 | Pt | 6.23250  | 15.55630 | 19.54363 | Pt | 0 | 0 | 0.00000 |
| HETATM | 193 | Pt | 13.48429 | 28.11676 | 19.54362 | Pt | 0 | 0 | 0.00000 |
| HETATM | 194 | Pt | 13.48428 | 11.36948 | 19.54365 | Pt | 0 | 0 | 0.00000 |
| HETATM | 195 | Pt | 13.48427 | 19.74312 | 19.54365 | Pt | 0 | 0 | 0.00000 |
| HETATM | 196 | Pt | 20.73606 | 32.30359 | 19.54366 | Pt | 0 | 0 | 0.00000 |
| HETATM | 197 | Pt | 20.73607 | 15.55627 | 19.54364 | Pt | 0 | 0 | 0.00000 |
| HETATM | 198 | Pt | 20.73606 | 23.92994 | 19.54364 | Pt | 0 | 0 | 0.00000 |
| HETATM | 199 | Pt | 6.23249  | 26.72101 | 19.54363 | Pt | 0 | 0 | 0.00000 |
| HETATM | 200 | Pt | 6.23250  | 9.97372  | 19.54364 | Pt | 0 | 0 | 0.00000 |
| HETATM | 201 | Pt | 6.23249  | 18.34736 | 19.54365 | Pt | 0 | 0 | 0.00000 |
| HETATM | 202 | Pt | 13.48426 | 30.90782 | 19.54365 | Pt | 0 | 0 | 0.00000 |
| HETATM | 203 | Pt | 13.48428 | 14.16056 | 19.54363 | Pt | 0 | 0 | 0.00000 |
| HETATM | 204 | Pt | 13.48429 | 22.53417 | 19.54363 | Pt | 0 | 0 | 0.00000 |
| HETATM | 205 | Pt | 20.73607 | 35.09464 | 19.54364 | Pt | 0 | 0 | 0.00000 |
| HETATM | 206 | Pt | 20.73606 | 18.34735 | 19.54366 | Pt | 0 | 0 | 0.00000 |
| HETATM | 207 | Pt | 20.73607 | 26.72101 | 19.54363 | Pt | 0 | 0 | 0.00000 |
| HETATM | 208 | Pt | 6.23225  | 4.39140  | 19.54464 | Pt | 0 | 0 | 0.00000 |
| HETATM | 209 | Pt | 6.23225  | 12.76500 | 19.54465 | Pt | 0 | 0 | 0.00000 |
| HETATM | 210 | Pt | 6.23223  | 21.13864 | 19.54469 | Pt | 0 | 0 | 0.00000 |
| HETATM | 211 | Pt | 13.48402 | 8.57818  | 19.54469 | Pt | 0 | 0 | 0.00000 |
| HETATM | 212 | Pt | 13.48403 | 16.95185 | 19.54466 | Pt | 0 | 0 | 0.00000 |
| HETATM | 213 | Pt | 13.48404 | 25.32546 | 19.54462 | Pt | 0 | 0 | 0.00000 |
| HETATM | 214 | Pt | 20.73583 | 12.76499 | 19.54465 | Pt | 0 | 0 | 0.00000 |
| HETATM | 215 | Pt | 20.73581 | 21.13865 | 19.54468 | Pt | 0 | 0 | 0.00000 |
| HETATM | 216 | Pt | 20.73581 | 29.51230 | 19.54466 | Pt | 0 | 0 | 0.00000 |
| HETATM | 217 | Pt | 8.65003  | 25.32548 | 19.54471 | Pt | 0 | 0 | 0.00000 |
| HETATM | 218 | Pt | 8.65005  | 8.57819  | 19.54475 | Pt | 0 | 0 | 0.00000 |
| HETATM | 219 | Pt | 8.65005  | 16.95182 | 19.54472 | Pt | 0 | 0 | 0.00000 |
| HETATM | 220 | Pt | 15.90183 | 29.51228 | 19.54474 | Pt | 0 | 0 | 0.00000 |
| HETATM | 221 | Pt | 15.90184 | 12.76502 | 19.54471 | Pt | 0 | 0 | 0.00000 |
| HETATM | 222 | Pt | 15.90184 | 21.13864 | 19.54476 | Pt | 0 | 0 | 0.00000 |
| HETATM | 223 | Pt | 1.39827  | 21.13866 | 19.54477 | Pt | 0 | 0 | 0.00000 |
| HETATM | 224 | Pt | 1.39826  | 4.39135  | 19.54473 | Pt | 0 | 0 | 0.00000 |
| HETATM | 225 | Pt | 1.39826  | 12.76502 | 19.54472 | Pt | 0 | 0 | 0.00000 |
| HETATM | 226 | Pt | 8.64995  | 28.11646 | 19.54463 | Pt | 0 | 0 | 0.00000 |
| HETATM | 227 | Pt | 8.64995  | 11.36914 | 19.54467 | Pt | 0 | 0 | 0.00000 |
| HETATM | 228 | Pt | 8.64992  | 19.74278 | 19.54465 | Pt | 0 | 0 | 0.00000 |
| HETATM | 229 | Pt | 15.90171 | 32.30324 | 19.54466 | Pt | 0 | 0 | 0.00000 |
| HETATM | 230 | Pt | 15.90173 | 15.55599 | 19.54465 | Pt | 0 | 0 | 0.00000 |
| HETATM | 231 | Pt | 15.90175 | 23.92961 | 19.54465 | Pt | 0 | 0 | 0.00000 |
| HETATM | 232 | Pt | 1.39817  | 23.92960 | 19.54470 | Pt | 0 | 0 | 0.00000 |
| HETATM | 233 | Pt | 1.39814  | 7.18233  | 19.54465 | Pt | 0 | 0 | 0.00000 |
| HETATM | 234 | Pt | 1.39817  | 15.55599 | 19.54466 | Pt | 0 | 0 | 0.00000 |
| HETATM | 235 | Pt | 8.64994  | 5.78725  | 19.54467 | Pt | 0 | 0 | 0.00000 |
| HETATM | 236 | Pt | 8.64995  | 14.16085 | 19.54466 | Pt | 0 | 0 | 0.00000 |
| HETATM | 237 | Pt | 8.64993  | 22.53450 | 19.54464 | Pt | 0 | 0 | 0.00000 |
| HETATM | 238 | Pt | 15.90171 | 9.97404  | 19.54464 | Pt | 0 | 0 | 0.00000 |
| HETATM | 239 | Pt | 15.90173 | 18.34770 | 19.54468 | Pt | 0 | 0 | 0.00000 |
| HETATM | 240 | Pt | 15.90175 | 26.72132 | 19.54464 | Pt | 0 | 0 | 0.00000 |
| HETATM | 241 | Pt | 1.39818  | 1.60039  | 19.54467 | Pt | 0 | 0 | 0.00000 |
| HETATM | 242 | Pt | 1.39814  | 9.97406  | 19.54465 | Pt | 0 | 0 | 0.00000 |
| HETATM | 243 | Pt | 1.39815  | 18.34770 | 19.54468 | Pt | 0 | 0 | 0.00000 |
| HETATM | 244 | Pt | 2.20421  | 19.74381 | 21.82541 | Pt | 0 | 0 | 0.00000 |
| HETATM | 245 | Pt | 2.20423  | 2.99650  | 21.82537 | Pt | 0 | 0 | 0.00000 |
| HETATM | 246 | Pt | 2.20420  | 11.37017 | 21.82535 | Pt | 0 | 0 | 0.00000 |

|        |     |    |          |          |          |    |   |   |         |
|--------|-----|----|----------|----------|----------|----|---|---|---------|
| HETATM | 247 | Pt | 9.45597  | 23.93062 | 21.82529 | Pt | 0 | 0 | 0.00000 |
| HETATM | 248 | Pt | 9.45599  | 7.18335  | 21.82540 | Pt | 0 | 0 | 0.00000 |
| HETATM | 249 | Pt | 9.45600  | 15.55697 | 21.82535 | Pt | 0 | 0 | 0.00000 |
| HETATM | 250 | Pt | 16.70779 | 28.11743 | 21.82534 | Pt | 0 | 0 | 0.00000 |
| HETATM | 251 | Pt | 16.70777 | 11.37016 | 21.82531 | Pt | 0 | 0 | 0.00000 |
| HETATM | 252 | Pt | 16.70778 | 19.74380 | 21.82542 | Pt | 0 | 0 | 0.00000 |
| HETATM | 253 | Pt | 2.20422  | 22.53350 | 21.82545 | Pt | 0 | 0 | 0.00000 |
| HETATM | 254 | Pt | 2.20420  | 5.78620  | 21.82533 | Pt | 0 | 0 | 0.00000 |
| HETATM | 255 | Pt | 2.20422  | 14.15987 | 21.82535 | Pt | 0 | 0 | 0.00000 |
| HETATM | 256 | Pt | 9.45600  | 26.72033 | 21.82528 | Pt | 0 | 0 | 0.00000 |
| HETATM | 257 | Pt | 9.45600  | 9.97304  | 21.82541 | Pt | 0 | 0 | 0.00000 |
| HETATM | 258 | Pt | 9.45597  | 18.34667 | 21.82536 | Pt | 0 | 0 | 0.00000 |
| HETATM | 259 | Pt | 16.70775 | 30.90713 | 21.82538 | Pt | 0 | 0 | 0.00000 |
| HETATM | 260 | Pt | 16.70779 | 14.15987 | 21.82533 | Pt | 0 | 0 | 0.00000 |
| HETATM | 261 | Pt | 16.70780 | 22.53350 | 21.82537 | Pt | 0 | 0 | 0.00000 |
| HETATM | 262 | Pt | 2.20499  | 25.32545 | 21.82243 | Pt | 0 | 0 | 0.00000 |
| HETATM | 263 | Pt | 2.20498  | 8.57820  | 21.82234 | Pt | 0 | 0 | 0.00000 |
| HETATM | 264 | Pt | 2.20500  | 16.95184 | 21.82240 | Pt | 0 | 0 | 0.00000 |
| HETATM | 265 | Pt | 9.45678  | 29.51231 | 21.82236 | Pt | 0 | 0 | 0.00000 |
| HETATM | 266 | Pt | 9.45680  | 12.76500 | 21.82239 | Pt | 0 | 0 | 0.00000 |
| HETATM | 267 | Pt | 9.45676  | 21.13863 | 21.82233 | Pt | 0 | 0 | 0.00000 |
| HETATM | 268 | Pt | 16.70854 | 33.69910 | 21.82235 | Pt | 0 | 0 | 0.00000 |
| HETATM | 269 | Pt | 16.70855 | 16.95184 | 21.82240 | Pt | 0 | 0 | 0.00000 |
| HETATM | 270 | Pt | 16.70859 | 25.32547 | 21.82237 | Pt | 0 | 0 | 0.00000 |
| HETATM | 271 | Pt | 4.62015  | 21.13864 | 21.82544 | Pt | 0 | 0 | 0.00000 |
| HETATM | 272 | Pt | 4.62016  | 4.39138  | 21.82534 | Pt | 0 | 0 | 0.00000 |
| HETATM | 273 | Pt | 4.62016  | 12.76500 | 21.82536 | Pt | 0 | 0 | 0.00000 |
| HETATM | 274 | Pt | 11.87195 | 25.32546 | 21.82526 | Pt | 0 | 0 | 0.00000 |
| HETATM | 275 | Pt | 11.87194 | 8.57818  | 21.82542 | Pt | 0 | 0 | 0.00000 |
| HETATM | 276 | Pt | 11.87195 | 16.95185 | 21.82537 | Pt | 0 | 0 | 0.00000 |
| HETATM | 277 | Pt | 19.12372 | 29.51230 | 21.82535 | Pt | 0 | 0 | 0.00000 |
| HETATM | 278 | Pt | 19.12373 | 12.76500 | 21.82533 | Pt | 0 | 0 | 0.00000 |
| HETATM | 279 | Pt | 19.12373 | 21.13864 | 21.82539 | Pt | 0 | 0 | 0.00000 |
| HETATM | 280 | Pt | 4.62093  | 23.92967 | 21.82222 | Pt | 0 | 0 | 0.00000 |
| HETATM | 281 | Pt | 4.62091  | 7.18239  | 21.82212 | Pt | 0 | 0 | 0.00000 |
| HETATM | 282 | Pt | 4.62093  | 15.55603 | 21.82216 | Pt | 0 | 0 | 0.00000 |
| HETATM | 283 | Pt | 11.87271 | 28.11650 | 21.82209 | Pt | 0 | 0 | 0.00000 |
| HETATM | 284 | Pt | 11.87272 | 11.36921 | 21.82218 | Pt | 0 | 0 | 0.00000 |
| HETATM | 285 | Pt | 11.87270 | 19.74285 | 21.82215 | Pt | 0 | 0 | 0.00000 |
| HETATM | 286 | Pt | 19.12447 | 32.30333 | 21.82215 | Pt | 0 | 0 | 0.00000 |
| HETATM | 287 | Pt | 19.12450 | 15.55602 | 21.82215 | Pt | 0 | 0 | 0.00000 |
| HETATM | 288 | Pt | 19.12450 | 23.92966 | 21.82215 | Pt | 0 | 0 | 0.00000 |
| HETATM | 289 | Pt | 4.62093  | 26.72125 | 21.82217 | Pt | 0 | 0 | 0.00000 |
| HETATM | 290 | Pt | 4.62092  | 9.97398  | 21.82215 | Pt | 0 | 0 | 0.00000 |
| HETATM | 291 | Pt | 4.62092  | 18.34764 | 21.82219 | Pt | 0 | 0 | 0.00000 |
| HETATM | 292 | Pt | 11.87270 | 30.90809 | 21.82218 | Pt | 0 | 0 | 0.00000 |
| HETATM | 293 | Pt | 11.87273 | 14.16082 | 21.82215 | Pt | 0 | 0 | 0.00000 |
| HETATM | 294 | Pt | 11.87270 | 22.53443 | 21.82209 | Pt | 0 | 0 | 0.00000 |
| HETATM | 295 | Pt | 19.12448 | 35.09491 | 21.82212 | Pt | 0 | 0 | 0.00000 |
| HETATM | 296 | Pt | 19.12449 | 18.34761 | 21.82218 | Pt | 0 | 0 | 0.00000 |
| HETATM | 297 | Pt | 19.12451 | 26.72127 | 21.82213 | Pt | 0 | 0 | 0.00000 |
| HETATM | 298 | Pt | 7.03768  | 22.53529 | 21.82238 | Pt | 0 | 0 | 0.00000 |
| HETATM | 299 | Pt | 7.03768  | 5.78806  | 21.82238 | Pt | 0 | 0 | 0.00000 |
| HETATM | 300 | Pt | 7.03768  | 14.16166 | 21.82236 | Pt | 0 | 0 | 0.00000 |
| HETATM | 301 | Pt | 14.28949 | 26.72212 | 21.82230 | Pt | 0 | 0 | 0.00000 |
| HETATM | 302 | Pt | 14.28946 | 9.97485  | 21.82239 | Pt | 0 | 0 | 0.00000 |
| HETATM | 303 | Pt | 14.28947 | 18.34850 | 21.82241 | Pt | 0 | 0 | 0.00000 |
| HETATM | 304 | Pt | 21.54124 | 30.90897 | 21.82240 | Pt | 0 | 0 | 0.00000 |
| HETATM | 305 | Pt | 21.54127 | 14.16164 | 21.82237 | Pt | 0 | 0 | 0.00000 |
| HETATM | 306 | Pt | 21.54126 | 22.53532 | 21.82239 | Pt | 0 | 0 | 0.00000 |
| HETATM | 307 | Pt | 7.03849  | 25.32547 | 21.82213 | Pt | 0 | 0 | 0.00000 |
| HETATM | 308 | Pt | 7.03852  | 8.57820  | 21.82217 | Pt | 0 | 0 | 0.00000 |
| HETATM | 309 | Pt | 7.03852  | 16.95182 | 21.82215 | Pt | 0 | 0 | 0.00000 |

|        |     |    |          |          |          |    |   |   |         |
|--------|-----|----|----------|----------|----------|----|---|---|---------|
| HETATM | 310 | Pt | 14.29029 | 29.51228 | 21.82216 | Pt | 0 | 0 | 0.00000 |
| HETATM | 311 | Pt | 14.29031 | 12.76502 | 21.82212 | Pt | 0 | 0 | 0.00000 |
| HETATM | 312 | Pt | 14.29030 | 21.13864 | 21.82217 | Pt | 0 | 0 | 0.00000 |
| HETATM | 313 | Pt | 21.54209 | 33.69912 | 21.82218 | Pt | 0 | 0 | 0.00000 |
| HETATM | 314 | Pt | 21.54208 | 16.95180 | 21.82215 | Pt | 0 | 0 | 0.00000 |
| HETATM | 315 | Pt | 21.54209 | 25.32548 | 21.82213 | Pt | 0 | 0 | 0.00000 |
| HETATM | 316 | Pt | 7.03769  | 28.11566 | 21.82231 | Pt | 0 | 0 | 0.00000 |
| HETATM | 317 | Pt | 7.03769  | 11.36835 | 21.82239 | Pt | 0 | 0 | 0.00000 |
| HETATM | 318 | Pt | 7.03767  | 19.74196 | 21.82242 | Pt | 0 | 0 | 0.00000 |
| HETATM | 319 | Pt | 14.28946 | 32.30244 | 21.82241 | Pt | 0 | 0 | 0.00000 |
| HETATM | 320 | Pt | 14.28947 | 15.55518 | 21.82236 | Pt | 0 | 0 | 0.00000 |
| HETATM | 321 | Pt | 14.28949 | 23.92880 | 21.82233 | Pt | 0 | 0 | 0.00000 |
| HETATM | 322 | Pt | 21.54126 | 36.48925 | 21.82241 | Pt | 0 | 0 | 0.00000 |
| HETATM | 323 | Pt | 21.54125 | 19.74198 | 21.82238 | Pt | 0 | 0 | 0.00000 |
| HETATM | 324 | Pt | 21.54125 | 28.11564 | 21.82236 | Pt | 0 | 0 | 0.00000 |
| HETATM | 325 | Pt | 3.00954  | 21.13864 | 24.11271 | Pt | 0 | 0 | 0.00000 |
| HETATM | 326 | Pt | 3.00954  | 4.39136  | 24.11254 | Pt | 0 | 0 | 0.00000 |
| HETATM | 327 | Pt | 3.00953  | 12.76502 | 24.11258 | Pt | 0 | 0 | 0.00000 |
| HETATM | 328 | Pt | 10.26131 | 25.32548 | 24.11241 | Pt | 0 | 0 | 0.00000 |
| HETATM | 329 | Pt | 10.26132 | 8.57819  | 24.11268 | Pt | 0 | 0 | 0.00000 |
| HETATM | 330 | Pt | 10.26131 | 16.95182 | 24.11258 | Pt | 0 | 0 | 0.00000 |
| HETATM | 331 | Pt | 17.51309 | 29.51228 | 24.11258 | Pt | 0 | 0 | 0.00000 |
| HETATM | 332 | Pt | 17.51310 | 12.76501 | 24.11252 | Pt | 0 | 0 | 0.00000 |
| HETATM | 333 | Pt | 17.51311 | 21.13865 | 24.11264 | Pt | 0 | 0 | 0.00000 |
| HETATM | 334 | Pt | 3.01094  | 23.92781 | 24.10302 | Pt | 0 | 0 | 0.00000 |
| HETATM | 335 | Pt | 3.01093  | 7.18053  | 24.10286 | Pt | 0 | 0 | 0.00000 |
| HETATM | 336 | Pt | 3.01094  | 15.55418 | 24.10293 | Pt | 0 | 0 | 0.00000 |
| HETATM | 337 | Pt | 10.26272 | 28.11466 | 24.10282 | Pt | 0 | 0 | 0.00000 |
| HETATM | 338 | Pt | 10.26273 | 11.36734 | 24.10296 | Pt | 0 | 0 | 0.00000 |
| HETATM | 339 | Pt | 10.26272 | 19.74099 | 24.10288 | Pt | 0 | 0 | 0.00000 |
| HETATM | 340 | Pt | 17.51449 | 32.30144 | 24.10291 | Pt | 0 | 0 | 0.00000 |
| HETATM | 341 | Pt | 17.51450 | 15.55419 | 24.10291 | Pt | 0 | 0 | 0.00000 |
| HETATM | 342 | Pt | 17.51451 | 23.92780 | 24.10292 | Pt | 0 | 0 | 0.00000 |
| HETATM | 343 | Pt | 3.01094  | 26.72309 | 24.10295 | Pt | 0 | 0 | 0.00000 |
| HETATM | 344 | Pt | 3.01094  | 9.97585  | 24.10289 | Pt | 0 | 0 | 0.00000 |
| HETATM | 345 | Pt | 3.01093  | 18.34949 | 24.10297 | Pt | 0 | 0 | 0.00000 |
| HETATM | 346 | Pt | 10.26271 | 30.90996 | 24.10293 | Pt | 0 | 0 | 0.00000 |
| HETATM | 347 | Pt | 10.26274 | 14.16266 | 24.10291 | Pt | 0 | 0 | 0.00000 |
| HETATM | 348 | Pt | 10.26272 | 22.53629 | 24.10280 | Pt | 0 | 0 | 0.00000 |
| HETATM | 349 | Pt | 17.51450 | 35.09676 | 24.10286 | Pt | 0 | 0 | 0.00000 |
| HETATM | 350 | Pt | 17.51450 | 18.34948 | 24.10297 | Pt | 0 | 0 | 0.00000 |
| HETATM | 351 | Pt | 17.51452 | 26.72312 | 24.10291 | Pt | 0 | 0 | 0.00000 |
| HETATM | 352 | Pt | 5.42433  | 22.53444 | 24.10297 | Pt | 0 | 0 | 0.00000 |
| HETATM | 353 | Pt | 5.42432  | 5.78718  | 24.10290 | Pt | 0 | 0 | 0.00000 |
| HETATM | 354 | Pt | 5.42431  | 14.16081 | 24.10290 | Pt | 0 | 0 | 0.00000 |
| HETATM | 355 | Pt | 12.67612 | 26.72127 | 24.10277 | Pt | 0 | 0 | 0.00000 |
| HETATM | 356 | Pt | 12.67610 | 9.97398  | 24.10297 | Pt | 0 | 0 | 0.00000 |
| HETATM | 357 | Pt | 12.67610 | 18.34764 | 24.10295 | Pt | 0 | 0 | 0.00000 |
| HETATM | 358 | Pt | 19.92786 | 30.90810 | 24.10293 | Pt | 0 | 0 | 0.00000 |
| HETATM | 359 | Pt | 19.92789 | 14.16079 | 24.10288 | Pt | 0 | 0 | 0.00000 |
| HETATM | 360 | Pt | 19.92789 | 22.53444 | 24.10293 | Pt | 0 | 0 | 0.00000 |
| HETATM | 361 | Pt | 5.42678  | 25.32546 | 24.09810 | Pt | 0 | 0 | 0.00000 |
| HETATM | 362 | Pt | 5.42680  | 8.57817  | 24.09803 | Pt | 0 | 0 | 0.00000 |
| HETATM | 363 | Pt | 5.42679  | 16.95185 | 24.09805 | Pt | 0 | 0 | 0.00000 |
| HETATM | 364 | Pt | 12.67856 | 29.51230 | 24.09804 | Pt | 0 | 0 | 0.00000 |
| HETATM | 365 | Pt | 12.67860 | 12.76501 | 24.09803 | Pt | 0 | 0 | 0.00000 |
| HETATM | 366 | Pt | 12.67859 | 21.13864 | 24.09802 | Pt | 0 | 0 | 0.00000 |
| HETATM | 367 | Pt | 19.93036 | 33.69913 | 24.09802 | Pt | 0 | 0 | 0.00000 |
| HETATM | 368 | Pt | 19.93036 | 16.95181 | 24.09806 | Pt | 0 | 0 | 0.00000 |
| HETATM | 369 | Pt | 19.93035 | 25.32545 | 24.09802 | Pt | 0 | 0 | 0.00000 |
| HETATM | 370 | Pt | 5.42433  | 28.11650 | 24.10285 | Pt | 0 | 0 | 0.00000 |
| HETATM | 371 | Pt | 5.42432  | 11.36920 | 24.10292 | Pt | 0 | 0 | 0.00000 |
| HETATM | 372 | Pt | 5.42431  | 19.74284 | 24.10300 | Pt | 0 | 0 | 0.00000 |

|        |     |    |          |          |          |    |   |   |         |
|--------|-----|----|----------|----------|----------|----|---|---|---------|
| HETATM | 373 | Pt | 12.67610 | 32.30330 | 24.10298 | Pt | 0 | 0 | 0.00000 |
| HETATM | 374 | Pt | 12.67611 | 15.55604 | 24.10291 | Pt | 0 | 0 | 0.00000 |
| HETATM | 375 | Pt | 12.67611 | 23.92966 | 24.10280 | Pt | 0 | 0 | 0.00000 |
| HETATM | 376 | Pt | 19.92788 | 36.49012 | 24.10292 | Pt | 0 | 0 | 0.00000 |
| HETATM | 377 | Pt | 19.92788 | 19.74284 | 24.10294 | Pt | 0 | 0 | 0.00000 |
| HETATM | 378 | Pt | 19.92788 | 28.11649 | 24.10288 | Pt | 0 | 0 | 0.00000 |
| HETATM | 379 | Pt | 7.84511  | 23.93208 | 24.10285 | Pt | 0 | 0 | 0.00000 |
| HETATM | 380 | Pt | 7.84513  | 7.18485  | 24.10296 | Pt | 0 | 0 | 0.00000 |
| HETATM | 381 | Pt | 7.84512  | 15.55846 | 24.10289 | Pt | 0 | 0 | 0.00000 |
| HETATM | 382 | Pt | 15.09691 | 28.11892 | 24.10286 | Pt | 0 | 0 | 0.00000 |
| HETATM | 383 | Pt | 15.09691 | 11.37164 | 24.10289 | Pt | 0 | 0 | 0.00000 |
| HETATM | 384 | Pt | 15.09691 | 19.74529 | 24.10298 | Pt | 0 | 0 | 0.00000 |
| HETATM | 385 | Pt | 0.59334  | 19.74530 | 24.10297 | Pt | 0 | 0 | 0.00000 |
| HETATM | 386 | Pt | 0.59334  | 2.99797  | 24.10289 | Pt | 0 | 0 | 0.00000 |
| HETATM | 387 | Pt | 0.59334  | 11.37165 | 24.10291 | Pt | 0 | 0 | 0.00000 |
| HETATM | 388 | Pt | 7.84511  | 26.71886 | 24.10280 | Pt | 0 | 0 | 0.00000 |
| HETATM | 389 | Pt | 7.84513  | 9.97156  | 24.10295 | Pt | 0 | 0 | 0.00000 |
| HETATM | 390 | Pt | 7.84512  | 18.34518 | 24.10295 | Pt | 0 | 0 | 0.00000 |
| HETATM | 391 | Pt | 15.09689 | 30.90565 | 24.10295 | Pt | 0 | 0 | 0.00000 |
| HETATM | 392 | Pt | 15.09691 | 14.15839 | 24.10287 | Pt | 0 | 0 | 0.00000 |
| HETATM | 393 | Pt | 15.09692 | 22.53201 | 24.10290 | Pt | 0 | 0 | 0.00000 |
| HETATM | 394 | Pt | 0.59335  | 22.53200 | 24.10301 | Pt | 0 | 0 | 0.00000 |
| HETATM | 395 | Pt | 0.59334  | 5.78472  | 24.10289 | Pt | 0 | 0 | 0.00000 |
| HETATM | 396 | Pt | 0.59334  | 14.15838 | 24.10288 | Pt | 0 | 0 | 0.00000 |
| HETATM | 397 | Pt | 7.84405  | 29.51231 | 24.09251 | Pt | 0 | 0 | 0.00000 |
| HETATM | 398 | Pt | 7.84406  | 12.76501 | 24.09253 | Pt | 0 | 0 | 0.00000 |
| HETATM | 399 | Pt | 7.84406  | 21.13862 | 24.09254 | Pt | 0 | 0 | 0.00000 |
| HETATM | 400 | Pt | 15.09585 | 33.69911 | 24.09255 | Pt | 0 | 0 | 0.00000 |
| HETATM | 401 | Pt | 15.09583 | 16.95183 | 24.09257 | Pt | 0 | 0 | 0.00000 |
| HETATM | 402 | Pt | 15.09585 | 25.32547 | 24.09247 | Pt | 0 | 0 | 0.00000 |
| HETATM | 403 | Pt | 0.59226  | 25.32545 | 24.09260 | Pt | 0 | 0 | 0.00000 |
| HETATM | 404 | Pt | 0.59227  | 8.57819  | 24.09252 | Pt | 0 | 0 | 0.00000 |
| HETATM | 405 | Pt | 0.59226  | 16.95184 | 24.09254 | Pt | 0 | 0 | 0.00000 |
| HETATM | 406 | Pt | 3.81329  | 22.53073 | 26.40158 | Pt | 0 | 0 | 0.00000 |
| HETATM | 407 | Pt | 3.81326  | 5.78345  | 26.40137 | Pt | 0 | 0 | 0.00000 |
| HETATM | 408 | Pt | 3.81326  | 14.15711 | 26.40146 | Pt | 0 | 0 | 0.00000 |
| HETATM | 409 | Pt | 11.06505 | 26.71758 | 26.40119 | Pt | 0 | 0 | 0.00000 |
| HETATM | 410 | Pt | 11.06503 | 9.97025  | 26.40157 | Pt | 0 | 0 | 0.00000 |
| HETATM | 411 | Pt | 11.06504 | 18.34394 | 26.40142 | Pt | 0 | 0 | 0.00000 |
| HETATM | 412 | Pt | 18.31680 | 30.90436 | 26.40147 | Pt | 0 | 0 | 0.00000 |
| HETATM | 413 | Pt | 18.31683 | 14.15711 | 26.40135 | Pt | 0 | 0 | 0.00000 |
| HETATM | 414 | Pt | 18.31682 | 22.53071 | 26.40151 | Pt | 0 | 0 | 0.00000 |
| HETATM | 415 | Pt | 3.81189  | 25.32544 | 26.37301 | Pt | 0 | 0 | 0.00000 |
| HETATM | 416 | Pt | 3.81192  | 8.57817  | 26.37285 | Pt | 0 | 0 | 0.00000 |
| HETATM | 417 | Pt | 3.81190  | 16.95186 | 26.37292 | Pt | 0 | 0 | 0.00000 |
| HETATM | 418 | Pt | 11.06366 | 29.51231 | 26.37288 | Pt | 0 | 0 | 0.00000 |
| HETATM | 419 | Pt | 11.06370 | 12.76499 | 26.37289 | Pt | 0 | 0 | 0.00000 |
| HETATM | 420 | Pt | 11.06370 | 21.13865 | 26.37282 | Pt | 0 | 0 | 0.00000 |
| HETATM | 421 | Pt | 18.31547 | 33.69910 | 26.37285 | Pt | 0 | 0 | 0.00000 |
| HETATM | 422 | Pt | 18.31545 | 16.95185 | 26.37293 | Pt | 0 | 0 | 0.00000 |
| HETATM | 423 | Pt | 18.31545 | 25.32545 | 26.37290 | Pt | 0 | 0 | 0.00000 |
| HETATM | 424 | Pt | 3.81328  | 2.99926  | 26.40136 | Pt | 0 | 0 | 0.00000 |
| HETATM | 425 | Pt | 3.81326  | 11.37291 | 26.40143 | Pt | 0 | 0 | 0.00000 |
| HETATM | 426 | Pt | 3.81325  | 19.74657 | 26.40161 | Pt | 0 | 0 | 0.00000 |
| HETATM | 427 | Pt | 11.06504 | 7.18610  | 26.40154 | Pt | 0 | 0 | 0.00000 |
| HETATM | 428 | Pt | 11.06505 | 15.55974 | 26.40144 | Pt | 0 | 0 | 0.00000 |
| HETATM | 429 | Pt | 11.06505 | 23.93337 | 26.40120 | Pt | 0 | 0 | 0.00000 |
| HETATM | 430 | Pt | 18.31682 | 11.37291 | 26.40135 | Pt | 0 | 0 | 0.00000 |
| HETATM | 431 | Pt | 18.31683 | 19.74658 | 26.40153 | Pt | 0 | 0 | 0.00000 |
| HETATM | 432 | Pt | 18.31681 | 28.12020 | 26.40144 | Pt | 0 | 0 | 0.00000 |
| HETATM | 433 | Pt | 6.23425  | 23.92691 | 26.37293 | Pt | 0 | 0 | 0.00000 |
| HETATM | 434 | Pt | 6.23427  | 7.17964  | 26.37293 | Pt | 0 | 0 | 0.00000 |
| HETATM | 435 | Pt | 6.23424  | 15.55332 | 26.37287 | Pt | 0 | 0 | 0.00000 |

|        |     |    |          |          |          |    |   |   |         |
|--------|-----|----|----------|----------|----------|----|---|---|---------|
| HETATM | 436 | Pt | 13.48601 | 28.11376 | 26.37281 | Pt | 0 | 0 | 0.00000 |
| HETATM | 437 | Pt | 13.48602 | 11.36644 | 26.37290 | Pt | 0 | 0 | 0.00000 |
| HETATM | 438 | Pt | 13.48606 | 19.74011 | 26.37296 | Pt | 0 | 0 | 0.00000 |
| HETATM | 439 | Pt | 20.73781 | 32.30058 | 26.37289 | Pt | 0 | 0 | 0.00000 |
| HETATM | 440 | Pt | 20.73782 | 15.55328 | 26.37288 | Pt | 0 | 0 | 0.00000 |
| HETATM | 441 | Pt | 20.73779 | 23.92691 | 26.37289 | Pt | 0 | 0 | 0.00000 |
| HETATM | 442 | Pt | 6.23424  | 26.72401 | 26.37284 | Pt | 0 | 0 | 0.00000 |
| HETATM | 443 | Pt | 6.23427  | 9.97671  | 26.37291 | Pt | 0 | 0 | 0.00000 |
| HETATM | 444 | Pt | 6.23425  | 18.35039 | 26.37298 | Pt | 0 | 0 | 0.00000 |
| HETATM | 445 | Pt | 13.48602 | 30.91084 | 26.37296 | Pt | 0 | 0 | 0.00000 |
| HETATM | 446 | Pt | 13.48603 | 14.16356 | 26.37287 | Pt | 0 | 0 | 0.00000 |
| HETATM | 447 | Pt | 13.48605 | 22.53719 | 26.37283 | Pt | 0 | 0 | 0.00000 |
| HETATM | 448 | Pt | 20.73784 | 35.09765 | 26.37293 | Pt | 0 | 0 | 0.00000 |
| HETATM | 449 | Pt | 20.73780 | 18.35037 | 26.37289 | Pt | 0 | 0 | 0.00000 |
| HETATM | 450 | Pt | 20.73777 | 26.72399 | 26.37284 | Pt | 0 | 0 | 0.00000 |
| HETATM | 451 | Pt | 6.24137  | 4.39137  | 26.37041 | Pt | 0 | 0 | 0.00000 |
| HETATM | 452 | Pt | 6.24136  | 12.76501 | 26.37042 | Pt | 0 | 0 | 0.00000 |
| HETATM | 453 | Pt | 6.24139  | 21.13864 | 26.37052 | Pt | 0 | 0 | 0.00000 |
| HETATM | 454 | Pt | 13.49316 | 8.57818  | 26.37051 | Pt | 0 | 0 | 0.00000 |
| HETATM | 455 | Pt | 13.49315 | 16.95183 | 26.37048 | Pt | 0 | 0 | 0.00000 |
| HETATM | 456 | Pt | 13.49316 | 25.32548 | 26.37030 | Pt | 0 | 0 | 0.00000 |
| HETATM | 457 | Pt | 20.74492 | 12.76501 | 26.37047 | Pt | 0 | 0 | 0.00000 |
| HETATM | 458 | Pt | 20.74493 | 21.13865 | 26.37046 | Pt | 0 | 0 | 0.00000 |
| HETATM | 459 | Pt | 20.74490 | 29.51228 | 26.37043 | Pt | 0 | 0 | 0.00000 |
| HETATM | 460 | Pt | 8.65386  | 25.32548 | 26.40121 | Pt | 0 | 0 | 0.00000 |
| HETATM | 461 | Pt | 8.65390  | 8.57820  | 26.40157 | Pt | 0 | 0 | 0.00000 |
| HETATM | 462 | Pt | 8.65388  | 16.95182 | 26.40146 | Pt | 0 | 0 | 0.00000 |
| HETATM | 463 | Pt | 15.90563 | 29.51227 | 26.40142 | Pt | 0 | 0 | 0.00000 |
| HETATM | 464 | Pt | 15.90564 | 12.76502 | 26.40134 | Pt | 0 | 0 | 0.00000 |
| HETATM | 465 | Pt | 15.90567 | 21.13867 | 26.40150 | Pt | 0 | 0 | 0.00000 |
| HETATM | 466 | Pt | 1.40213  | 21.13864 | 26.40160 | Pt | 0 | 0 | 0.00000 |
| HETATM | 467 | Pt | 1.40209  | 4.39135  | 26.40136 | Pt | 0 | 0 | 0.00000 |
| HETATM | 468 | Pt | 1.40208  | 12.76502 | 26.40142 | Pt | 0 | 0 | 0.00000 |
| HETATM | 469 | Pt | 8.64539  | 28.12434 | 26.37034 | Pt | 0 | 0 | 0.00000 |
| HETATM | 470 | Pt | 8.64542  | 11.37702 | 26.37047 | Pt | 0 | 0 | 0.00000 |
| HETATM | 471 | Pt | 8.64543  | 19.75066 | 26.37045 | Pt | 0 | 0 | 0.00000 |
| HETATM | 472 | Pt | 15.89718 | 32.31113 | 26.37047 | Pt | 0 | 0 | 0.00000 |
| HETATM | 473 | Pt | 15.89718 | 15.56387 | 26.37044 | Pt | 0 | 0 | 0.00000 |
| HETATM | 474 | Pt | 15.89719 | 23.93750 | 26.37042 | Pt | 0 | 0 | 0.00000 |
| HETATM | 475 | Pt | 1.39362  | 23.93749 | 26.37057 | Pt | 0 | 0 | 0.00000 |
| HETATM | 476 | Pt | 1.39362  | 7.19021  | 26.37040 | Pt | 0 | 0 | 0.00000 |
| HETATM | 477 | Pt | 1.39361  | 15.56385 | 26.37043 | Pt | 0 | 0 | 0.00000 |
| HETATM | 478 | Pt | 8.64541  | 5.77935  | 26.37047 | Pt | 0 | 0 | 0.00000 |
| HETATM | 479 | Pt | 8.64541  | 14.15299 | 26.37042 | Pt | 0 | 0 | 0.00000 |
| HETATM | 480 | Pt | 8.64541  | 22.52660 | 26.37036 | Pt | 0 | 0 | 0.00000 |
| HETATM | 481 | Pt | 15.89719 | 9.96616  | 26.37042 | Pt | 0 | 0 | 0.00000 |
| HETATM | 482 | Pt | 15.89718 | 18.33980 | 26.37052 | Pt | 0 | 0 | 0.00000 |
| HETATM | 483 | Pt | 15.89718 | 26.71344 | 26.37039 | Pt | 0 | 0 | 0.00000 |
| HETATM | 484 | Pt | 1.39361  | 1.59249  | 26.37048 | Pt | 0 | 0 | 0.00000 |
| HETATM | 485 | Pt | 1.39362  | 9.96616  | 26.37042 | Pt | 0 | 0 | 0.00000 |
| HETATM | 486 | Pt | 1.39361  | 18.33982 | 26.37049 | Pt | 0 | 0 | 0.00000 |
| HETATM | 487 | Pt | 2.20955  | 19.75303 | 28.73929 | Pt | 0 | 0 | 0.00000 |
| HETATM | 488 | Pt | 2.20955  | 3.00566  | 28.73886 | Pt | 0 | 0 | 0.00000 |
| HETATM | 489 | Pt | 2.20950  | 11.37932 | 28.73894 | Pt | 0 | 0 | 0.00000 |
| HETATM | 490 | Pt | 9.46132  | 23.93982 | 28.73867 | Pt | 0 | 0 | 0.00000 |
| HETATM | 491 | Pt | 9.46131  | 7.19249  | 28.73915 | Pt | 0 | 0 | 0.00000 |
| HETATM | 492 | Pt | 9.46135  | 15.56617 | 28.73905 | Pt | 0 | 0 | 0.00000 |
| HETATM | 493 | Pt | 16.71304 | 28.12657 | 28.73895 | Pt | 0 | 0 | 0.00000 |
| HETATM | 494 | Pt | 16.71307 | 11.37938 | 28.73884 | Pt | 0 | 0 | 0.00000 |
| HETATM | 495 | Pt | 16.71306 | 19.75301 | 28.73909 | Pt | 0 | 0 | 0.00000 |
| HETATM | 496 | Pt | 2.20955  | 22.52434 | 28.73919 | Pt | 0 | 0 | 0.00000 |
| HETATM | 497 | Pt | 2.20953  | 5.77699  | 28.73892 | Pt | 0 | 0 | 0.00000 |
| HETATM | 498 | Pt | 2.20951  | 14.15068 | 28.73900 | Pt | 0 | 0 | 0.00000 |



|        |     |    |          |          |          |    |   |   |         |
|--------|-----|----|----------|----------|----------|----|---|---|---------|
| HETATM | 499 | Pt | 9.46132  | 26.71116 | 28.73866 | Pt | 0 | 0 | 0.00000 |
| HETATM | 500 | Pt | 9.46134  | 9.96381  | 28.73926 | Pt | 0 | 0 | 0.00000 |
| HETATM | 501 | Pt | 9.46132  | 18.33753 | 28.73900 | Pt | 0 | 0 | 0.00000 |
| HETATM | 502 | Pt | 16.71302 | 30.89794 | 28.73900 | Pt | 0 | 0 | 0.00000 |
| HETATM | 503 | Pt | 16.71309 | 14.15069 | 28.73881 | Pt | 0 | 0 | 0.00000 |
| HETATM | 504 | Pt | 16.71307 | 22.52431 | 28.73910 | Pt | 0 | 0 | 0.00000 |
| HETATM | 505 | Pt | 2.21457  | 25.32548 | 28.69346 | Pt | 0 | 0 | 0.00000 |
| HETATM | 506 | Pt | 2.21460  | 8.57814  | 28.69323 | Pt | 0 | 0 | 0.00000 |
| HETATM | 507 | Pt | 2.21453  | 16.95186 | 28.69327 | Pt | 0 | 0 | 0.00000 |
| HETATM | 508 | Pt | 9.46633  | 29.51227 | 28.69329 | Pt | 0 | 0 | 0.00000 |
| HETATM | 509 | Pt | 9.46632  | 12.76500 | 28.69325 | Pt | 0 | 0 | 0.00000 |
| HETATM | 510 | Pt | 9.46640  | 21.13868 | 28.69325 | Pt | 0 | 0 | 0.00000 |
| HETATM | 511 | Pt | 16.71815 | 33.69915 | 28.69327 | Pt | 0 | 0 | 0.00000 |
| HETATM | 512 | Pt | 16.71813 | 16.95182 | 28.69337 | Pt | 0 | 0 | 0.00000 |
| HETATM | 513 | Pt | 16.71807 | 25.32545 | 28.69329 | Pt | 0 | 0 | 0.00000 |
| HETATM | 514 | Pt | 4.60961  | 21.13866 | 28.73918 | Pt | 0 | 0 | 0.00000 |
| HETATM | 515 | Pt | 4.60960  | 4.39137  | 28.73887 | Pt | 0 | 0 | 0.00000 |
| HETATM | 516 | Pt | 4.60957  | 12.76498 | 28.73900 | Pt | 0 | 0 | 0.00000 |
| HETATM | 517 | Pt | 11.86134 | 25.32546 | 28.73864 | Pt | 0 | 0 | 0.00000 |
| HETATM | 518 | Pt | 11.86136 | 8.57816  | 28.73914 | Pt | 0 | 0 | 0.00000 |
| HETATM | 519 | Pt | 11.86138 | 16.95188 | 28.73894 | Pt | 0 | 0 | 0.00000 |
| HETATM | 520 | Pt | 19.11309 | 29.51230 | 28.73909 | Pt | 0 | 0 | 0.00000 |
| HETATM | 521 | Pt | 19.11312 | 12.76500 | 28.73887 | Pt | 0 | 0 | 0.00000 |
| HETATM | 522 | Pt | 19.11311 | 21.13865 | 28.73918 | Pt | 0 | 0 | 0.00000 |
| HETATM | 523 | Pt | 4.63051  | 23.94618 | 28.63947 | Pt | 0 | 0 | 0.00000 |
| HETATM | 524 | Pt | 4.63050  | 7.19889  | 28.63928 | Pt | 0 | 0 | 0.00000 |
| HETATM | 525 | Pt | 4.63046  | 15.57257 | 28.63934 | Pt | 0 | 0 | 0.00000 |
| HETATM | 526 | Pt | 11.88223 | 28.13300 | 28.63918 | Pt | 0 | 0 | 0.00000 |
| HETATM | 527 | Pt | 11.88224 | 11.38571 | 28.63939 | Pt | 0 | 0 | 0.00000 |
| HETATM | 528 | Pt | 11.88227 | 19.75941 | 28.63932 | Pt | 0 | 0 | 0.00000 |
| HETATM | 529 | Pt | 19.13405 | 32.31981 | 28.63932 | Pt | 0 | 0 | 0.00000 |
| HETATM | 530 | Pt | 19.13403 | 15.57257 | 28.63929 | Pt | 0 | 0 | 0.00000 |
| HETATM | 531 | Pt | 19.13399 | 23.94617 | 28.63936 | Pt | 0 | 0 | 0.00000 |
| HETATM | 532 | Pt | 4.63051  | 26.70475 | 28.63932 | Pt | 0 | 0 | 0.00000 |
| HETATM | 533 | Pt | 4.63050  | 9.95744  | 28.63932 | Pt | 0 | 0 | 0.00000 |
| HETATM | 534 | Pt | 4.63047  | 18.33112 | 28.63944 | Pt | 0 | 0 | 0.00000 |
| HETATM | 535 | Pt | 11.88222 | 30.89155 | 28.63941 | Pt | 0 | 0 | 0.00000 |
| HETATM | 536 | Pt | 11.88224 | 14.14427 | 28.63930 | Pt | 0 | 0 | 0.00000 |
| HETATM | 537 | Pt | 11.88229 | 22.51796 | 28.63916 | Pt | 0 | 0 | 0.00000 |
| HETATM | 538 | Pt | 19.13405 | 35.07838 | 28.63926 | Pt | 0 | 0 | 0.00000 |
| HETATM | 539 | Pt | 19.13404 | 18.33115 | 28.63939 | Pt | 0 | 0 | 0.00000 |
| HETATM | 540 | Pt | 19.13399 | 26.70473 | 28.63931 | Pt | 0 | 0 | 0.00000 |
| HETATM | 541 | Pt | 7.03298  | 22.54361 | 28.69333 | Pt | 0 | 0 | 0.00000 |
| HETATM | 542 | Pt | 7.03293  | 5.79626  | 28.69333 | Pt | 0 | 0 | 0.00000 |
| HETATM | 543 | Pt | 7.03292  | 14.16998 | 28.69322 | Pt | 0 | 0 | 0.00000 |
| HETATM | 544 | Pt | 14.28463 | 26.73041 | 28.69320 | Pt | 0 | 0 | 0.00000 |
| HETATM | 545 | Pt | 14.28474 | 9.98313  | 28.69333 | Pt | 0 | 0 | 0.00000 |
| HETATM | 546 | Pt | 14.28470 | 18.35678 | 28.69341 | Pt | 0 | 0 | 0.00000 |
| HETATM | 547 | Pt | 21.53650 | 30.91720 | 28.69324 | Pt | 0 | 0 | 0.00000 |
| HETATM | 548 | Pt | 21.53645 | 14.16997 | 28.69334 | Pt | 0 | 0 | 0.00000 |
| HETATM | 549 | Pt | 21.53648 | 22.54357 | 28.69328 | Pt | 0 | 0 | 0.00000 |
| HETATM | 550 | Pt | 7.01949  | 25.32547 | 28.63923 | Pt | 0 | 0 | 0.00000 |
| HETATM | 551 | Pt | 7.01949  | 8.57816  | 28.63942 | Pt | 0 | 0 | 0.00000 |
| HETATM | 552 | Pt | 7.01948  | 16.95185 | 28.63935 | Pt | 0 | 0 | 0.00000 |
| HETATM | 553 | Pt | 14.27119 | 29.51227 | 28.63933 | Pt | 0 | 0 | 0.00000 |
| HETATM | 554 | Pt | 14.27121 | 12.76498 | 28.63925 | Pt | 0 | 0 | 0.00000 |
| HETATM | 555 | Pt | 14.27124 | 21.13871 | 28.63937 | Pt | 0 | 0 | 0.00000 |
| HETATM | 556 | Pt | 21.52304 | 33.69909 | 28.63940 | Pt | 0 | 0 | 0.00000 |
| HETATM | 557 | Pt | 21.52302 | 16.95186 | 28.63927 | Pt | 0 | 0 | 0.00000 |
| HETATM | 558 | Pt | 21.52298 | 25.32544 | 28.63929 | Pt | 0 | 0 | 0.00000 |
| HETATM | 559 | Pt | 7.03291  | 28.10732 | 28.69324 | Pt | 0 | 0 | 0.00000 |
| HETATM | 560 | Pt | 7.03295  | 11.36006 | 28.69326 | Pt | 0 | 0 | 0.00000 |
| HETATM | 561 | Pt | 7.03297  | 19.73374 | 28.69338 | Pt | 0 | 0 | 0.00000 |

|        |     |    |          |          |          |    |   |   |         |
|--------|-----|----|----------|----------|----------|----|---|---|---------|
| HETATM | 562 | Pt | 14.28469 | 32.29416 | 28.69339 | Pt | 0 | 0 | 0.00000 |
| HETATM | 563 | Pt | 14.28470 | 15.54686 | 28.69333 | Pt | 0 | 0 | 0.00000 |
| HETATM | 564 | Pt | 14.28469 | 23.92057 | 28.69322 | Pt | 0 | 0 | 0.00000 |
| HETATM | 565 | Pt | 21.53646 | 36.48101 | 28.69339 | Pt | 0 | 0 | 0.00000 |
| HETATM | 566 | Pt | 21.53653 | 19.73372 | 28.69326 | Pt | 0 | 0 | 0.00000 |
| HETATM | 567 | Pt | 21.53643 | 28.10732 | 28.69321 | Pt | 0 | 0 | 0.00000 |
| HETATM | 568 | O  | 3.00961  | 21.13872 | 29.85948 | O  | 0 | 0 | 0.00000 |
| HETATM | 569 | O  | 3.00956  | 4.39128  | 29.85901 | O  | 0 | 0 | 0.00000 |
| HETATM | 570 | O  | 3.00948  | 12.76496 | 29.85913 | O  | 0 | 0 | 0.00000 |
| HETATM | 571 | O  | 10.26136 | 25.32550 | 29.85884 | O  | 0 | 0 | 0.00000 |
| HETATM | 572 | O  | 10.26141 | 8.57809  | 29.85944 | O  | 0 | 0 | 0.00000 |
| HETATM | 573 | O  | 10.26143 | 16.95188 | 29.85912 | O  | 0 | 0 | 0.00000 |
| HETATM | 574 | O  | 17.51295 | 29.51222 | 29.85913 | O  | 0 | 0 | 0.00000 |
| HETATM | 575 | O  | 17.51304 | 12.76505 | 29.85896 | O  | 0 | 0 | 0.00000 |
| HETATM | 576 | O  | 17.51303 | 21.13866 | 29.85937 | O  | 0 | 0 | 0.00000 |

UNIT ENERGY kcal

ENERGY -73580.879737

END

XTLGRF 200

DESCRP TS

REMARK Pt111\_0.11ML\_9x9x7\_30.0\_vac hcp-displacement

FIXATOMS 1 162

CRYSTX 25.12092 25.12092 43.67409 90.00000 90.00000 60.00000

FORMAT ATOM (a6,1x,i5,1x,a5,1x,a3,1x,a1,1x,a5,3f10.5,1x,a5,i3,i2,1x,f8.5)

|        |    |    |          |          |          |    |   |   |         |
|--------|----|----|----------|----------|----------|----|---|---|---------|
| HETATM | 1  | Pt | 2.20377  | 19.74305 | 14.98634 | Pt | 0 | 0 | 0.00000 |
| HETATM | 2  | Pt | 2.20377  | 2.99577  | 14.98634 | Pt | 0 | 0 | 0.00000 |
| HETATM | 3  | Pt | 2.20377  | 11.36941 | 14.98634 | Pt | 0 | 0 | 0.00000 |
| HETATM | 4  | Pt | 9.45555  | 23.92987 | 14.98634 | Pt | 0 | 0 | 0.00000 |
| HETATM | 5  | Pt | 9.45555  | 7.18259  | 14.98634 | Pt | 0 | 0 | 0.00000 |
| HETATM | 6  | Pt | 9.45555  | 15.55623 | 14.98634 | Pt | 0 | 0 | 0.00000 |
| HETATM | 7  | Pt | 16.70734 | 28.11669 | 14.98634 | Pt | 0 | 0 | 0.00000 |
| HETATM | 8  | Pt | 16.70734 | 11.36941 | 14.98634 | Pt | 0 | 0 | 0.00000 |
| HETATM | 9  | Pt | 16.70734 | 19.74305 | 14.98634 | Pt | 0 | 0 | 0.00000 |
| HETATM | 10 | Pt | 2.20377  | 22.53426 | 14.98634 | Pt | 0 | 0 | 0.00000 |
| HETATM | 11 | Pt | 2.20377  | 5.78698  | 14.98634 | Pt | 0 | 0 | 0.00000 |
| HETATM | 12 | Pt | 2.20377  | 14.16062 | 14.98634 | Pt | 0 | 0 | 0.00000 |
| HETATM | 13 | Pt | 9.45555  | 26.72108 | 14.98634 | Pt | 0 | 0 | 0.00000 |
| HETATM | 14 | Pt | 9.45555  | 9.97380  | 14.98634 | Pt | 0 | 0 | 0.00000 |
| HETATM | 15 | Pt | 9.45555  | 18.34744 | 14.98634 | Pt | 0 | 0 | 0.00000 |
| HETATM | 16 | Pt | 16.70734 | 30.90790 | 14.98634 | Pt | 0 | 0 | 0.00000 |
| HETATM | 17 | Pt | 16.70734 | 14.16062 | 14.98634 | Pt | 0 | 0 | 0.00000 |
| HETATM | 18 | Pt | 16.70734 | 22.53426 | 14.98634 | Pt | 0 | 0 | 0.00000 |
| HETATM | 19 | Pt | 2.20377  | 25.32547 | 14.98634 | Pt | 0 | 0 | 0.00000 |
| HETATM | 20 | Pt | 2.20377  | 8.57819  | 14.98634 | Pt | 0 | 0 | 0.00000 |
| HETATM | 21 | Pt | 2.20377  | 16.95183 | 14.98634 | Pt | 0 | 0 | 0.00000 |
| HETATM | 22 | Pt | 9.45555  | 29.51229 | 14.98634 | Pt | 0 | 0 | 0.00000 |
| HETATM | 23 | Pt | 9.45555  | 12.76501 | 14.98634 | Pt | 0 | 0 | 0.00000 |
| HETATM | 24 | Pt | 9.45555  | 21.13865 | 14.98634 | Pt | 0 | 0 | 0.00000 |
| HETATM | 25 | Pt | 16.70734 | 33.69911 | 14.98634 | Pt | 0 | 0 | 0.00000 |
| HETATM | 26 | Pt | 16.70734 | 16.95183 | 14.98634 | Pt | 0 | 0 | 0.00000 |
| HETATM | 27 | Pt | 16.70734 | 25.32547 | 14.98634 | Pt | 0 | 0 | 0.00000 |
| HETATM | 28 | Pt | 4.62103  | 21.13866 | 14.98634 | Pt | 0 | 0 | 0.00000 |
| HETATM | 29 | Pt | 4.62103  | 4.39138  | 14.98634 | Pt | 0 | 0 | 0.00000 |
| HETATM | 30 | Pt | 4.62103  | 12.76502 | 14.98634 | Pt | 0 | 0 | 0.00000 |
| HETATM | 31 | Pt | 11.87281 | 25.32548 | 14.98634 | Pt | 0 | 0 | 0.00000 |
| HETATM | 32 | Pt | 11.87281 | 8.57820  | 14.98634 | Pt | 0 | 0 | 0.00000 |
| HETATM | 33 | Pt | 11.87281 | 16.95184 | 14.98634 | Pt | 0 | 0 | 0.00000 |
| HETATM | 34 | Pt | 19.12460 | 29.51230 | 14.98634 | Pt | 0 | 0 | 0.00000 |
| HETATM | 35 | Pt | 19.12460 | 12.76502 | 14.98634 | Pt | 0 | 0 | 0.00000 |
| HETATM | 36 | Pt | 19.12460 | 21.13866 | 14.98634 | Pt | 0 | 0 | 0.00000 |
| HETATM | 37 | Pt | 4.62103  | 23.92987 | 14.98634 | Pt | 0 | 0 | 0.00000 |
| HETATM | 38 | Pt | 4.62103  | 7.18259  | 14.98634 | Pt | 0 | 0 | 0.00000 |

|        |     |    |          |          |          |    |   |   |         |
|--------|-----|----|----------|----------|----------|----|---|---|---------|
| HETATM | 39  | Pt | 4.62103  | 15.55623 | 14.98634 | Pt | 0 | 0 | 0.00000 |
| HETATM | 40  | Pt | 11.87281 | 28.11669 | 14.98634 | Pt | 0 | 0 | 0.00000 |
| HETATM | 41  | Pt | 11.87281 | 11.36941 | 14.98634 | Pt | 0 | 0 | 0.00000 |
| HETATM | 42  | Pt | 11.87281 | 19.74305 | 14.98634 | Pt | 0 | 0 | 0.00000 |
| HETATM | 43  | Pt | 19.12460 | 32.30351 | 14.98634 | Pt | 0 | 0 | 0.00000 |
| HETATM | 44  | Pt | 19.12460 | 15.55623 | 14.98634 | Pt | 0 | 0 | 0.00000 |
| HETATM | 45  | Pt | 19.12460 | 23.92987 | 14.98634 | Pt | 0 | 0 | 0.00000 |
| HETATM | 46  | Pt | 4.62103  | 26.72108 | 14.98634 | Pt | 0 | 0 | 0.00000 |
| HETATM | 47  | Pt | 4.62103  | 9.97380  | 14.98634 | Pt | 0 | 0 | 0.00000 |
| HETATM | 48  | Pt | 4.62103  | 18.34744 | 14.98634 | Pt | 0 | 0 | 0.00000 |
| HETATM | 49  | Pt | 11.87281 | 30.90790 | 14.98634 | Pt | 0 | 0 | 0.00000 |
| HETATM | 50  | Pt | 11.87281 | 14.16062 | 14.98634 | Pt | 0 | 0 | 0.00000 |
| HETATM | 51  | Pt | 11.87281 | 22.53426 | 14.98634 | Pt | 0 | 0 | 0.00000 |
| HETATM | 52  | Pt | 19.12460 | 35.09472 | 14.98634 | Pt | 0 | 0 | 0.00000 |
| HETATM | 53  | Pt | 19.12460 | 18.34744 | 14.98634 | Pt | 0 | 0 | 0.00000 |
| HETATM | 54  | Pt | 19.12460 | 26.72108 | 14.98634 | Pt | 0 | 0 | 0.00000 |
| HETATM | 55  | Pt | 7.03829  | 22.53426 | 14.98634 | Pt | 0 | 0 | 0.00000 |
| HETATM | 56  | Pt | 7.03829  | 5.78698  | 14.98634 | Pt | 0 | 0 | 0.00000 |
| HETATM | 57  | Pt | 7.03829  | 14.16062 | 14.98634 | Pt | 0 | 0 | 0.00000 |
| HETATM | 58  | Pt | 14.29007 | 26.72108 | 14.98634 | Pt | 0 | 0 | 0.00000 |
| HETATM | 59  | Pt | 14.29007 | 9.97380  | 14.98634 | Pt | 0 | 0 | 0.00000 |
| HETATM | 60  | Pt | 14.29007 | 18.34744 | 14.98634 | Pt | 0 | 0 | 0.00000 |
| HETATM | 61  | Pt | 21.54186 | 30.90790 | 14.98634 | Pt | 0 | 0 | 0.00000 |
| HETATM | 62  | Pt | 21.54186 | 14.16062 | 14.98634 | Pt | 0 | 0 | 0.00000 |
| HETATM | 63  | Pt | 21.54186 | 22.53426 | 14.98634 | Pt | 0 | 0 | 0.00000 |
| HETATM | 64  | Pt | 7.03829  | 25.32547 | 14.98634 | Pt | 0 | 0 | 0.00000 |
| HETATM | 65  | Pt | 7.03829  | 8.57819  | 14.98634 | Pt | 0 | 0 | 0.00000 |
| HETATM | 66  | Pt | 7.03829  | 16.95183 | 14.98634 | Pt | 0 | 0 | 0.00000 |
| HETATM | 67  | Pt | 14.29007 | 29.51229 | 14.98634 | Pt | 0 | 0 | 0.00000 |
| HETATM | 68  | Pt | 14.29007 | 12.76501 | 14.98634 | Pt | 0 | 0 | 0.00000 |
| HETATM | 69  | Pt | 14.29007 | 21.13865 | 14.98634 | Pt | 0 | 0 | 0.00000 |
| HETATM | 70  | Pt | 21.54186 | 33.69911 | 14.98634 | Pt | 0 | 0 | 0.00000 |
| HETATM | 71  | Pt | 21.54186 | 16.95183 | 14.98634 | Pt | 0 | 0 | 0.00000 |
| HETATM | 72  | Pt | 21.54186 | 25.32547 | 14.98634 | Pt | 0 | 0 | 0.00000 |
| HETATM | 73  | Pt | 7.03829  | 28.11669 | 14.98634 | Pt | 0 | 0 | 0.00000 |
| HETATM | 74  | Pt | 7.03829  | 11.36941 | 14.98634 | Pt | 0 | 0 | 0.00000 |
| HETATM | 75  | Pt | 7.03829  | 19.74305 | 14.98634 | Pt | 0 | 0 | 0.00000 |
| HETATM | 76  | Pt | 14.29007 | 32.30351 | 14.98634 | Pt | 0 | 0 | 0.00000 |
| HETATM | 77  | Pt | 14.29007 | 15.55623 | 14.98634 | Pt | 0 | 0 | 0.00000 |
| HETATM | 78  | Pt | 14.29007 | 23.92987 | 14.98634 | Pt | 0 | 0 | 0.00000 |
| HETATM | 79  | Pt | 21.54186 | 36.49033 | 14.98634 | Pt | 0 | 0 | 0.00000 |
| HETATM | 80  | Pt | 21.54186 | 19.74305 | 14.98634 | Pt | 0 | 0 | 0.00000 |
| HETATM | 81  | Pt | 21.54186 | 28.11669 | 14.98634 | Pt | 0 | 0 | 0.00000 |
| HETATM | 82  | Pt | 3.00952  | 21.13866 | 17.26536 | Pt | 0 | 0 | 0.00000 |
| HETATM | 83  | Pt | 3.00952  | 4.39138  | 17.26536 | Pt | 0 | 0 | 0.00000 |
| HETATM | 84  | Pt | 3.00952  | 12.76502 | 17.26536 | Pt | 0 | 0 | 0.00000 |
| HETATM | 85  | Pt | 10.26130 | 25.32548 | 17.26536 | Pt | 0 | 0 | 0.00000 |
| HETATM | 86  | Pt | 10.26130 | 8.57820  | 17.26536 | Pt | 0 | 0 | 0.00000 |
| HETATM | 87  | Pt | 10.26130 | 16.95184 | 17.26536 | Pt | 0 | 0 | 0.00000 |
| HETATM | 88  | Pt | 17.51309 | 29.51230 | 17.26536 | Pt | 0 | 0 | 0.00000 |
| HETATM | 89  | Pt | 17.51309 | 12.76502 | 17.26536 | Pt | 0 | 0 | 0.00000 |
| HETATM | 90  | Pt | 17.51309 | 21.13866 | 17.26536 | Pt | 0 | 0 | 0.00000 |
| HETATM | 91  | Pt | 3.00952  | 23.92987 | 17.26536 | Pt | 0 | 0 | 0.00000 |
| HETATM | 92  | Pt | 3.00952  | 7.18259  | 17.26536 | Pt | 0 | 0 | 0.00000 |
| HETATM | 93  | Pt | 3.00952  | 15.55623 | 17.26536 | Pt | 0 | 0 | 0.00000 |
| HETATM | 94  | Pt | 10.26130 | 28.11669 | 17.26536 | Pt | 0 | 0 | 0.00000 |
| HETATM | 95  | Pt | 10.26130 | 11.36941 | 17.26536 | Pt | 0 | 0 | 0.00000 |
| HETATM | 96  | Pt | 10.26130 | 19.74305 | 17.26536 | Pt | 0 | 0 | 0.00000 |
| HETATM | 97  | Pt | 17.51309 | 32.30351 | 17.26536 | Pt | 0 | 0 | 0.00000 |
| HETATM | 98  | Pt | 17.51309 | 15.55623 | 17.26536 | Pt | 0 | 0 | 0.00000 |
| HETATM | 99  | Pt | 17.51309 | 23.92987 | 17.26536 | Pt | 0 | 0 | 0.00000 |
| HETATM | 100 | Pt | 3.00952  | 26.72108 | 17.26536 | Pt | 0 | 0 | 0.00000 |
| HETATM | 101 | Pt | 3.00952  | 9.97380  | 17.26536 | Pt | 0 | 0 | 0.00000 |

|        |     |    |          |          |          |    |   |   |         |
|--------|-----|----|----------|----------|----------|----|---|---|---------|
| HETATM | 102 | Pt | 3.00952  | 18.34744 | 17.26536 | Pt | 0 | 0 | 0.00000 |
| HETATM | 103 | Pt | 10.26130 | 30.90790 | 17.26536 | Pt | 0 | 0 | 0.00000 |
| HETATM | 104 | Pt | 10.26130 | 14.16062 | 17.26536 | Pt | 0 | 0 | 0.00000 |
| HETATM | 105 | Pt | 10.26130 | 22.53426 | 17.26536 | Pt | 0 | 0 | 0.00000 |
| HETATM | 106 | Pt | 17.51309 | 35.09472 | 17.26536 | Pt | 0 | 0 | 0.00000 |
| HETATM | 107 | Pt | 17.51309 | 18.34744 | 17.26536 | Pt | 0 | 0 | 0.00000 |
| HETATM | 108 | Pt | 17.51309 | 26.72108 | 17.26536 | Pt | 0 | 0 | 0.00000 |
| HETATM | 109 | Pt | 5.42678  | 22.53426 | 17.26536 | Pt | 0 | 0 | 0.00000 |
| HETATM | 110 | Pt | 5.42678  | 5.78698  | 17.26536 | Pt | 0 | 0 | 0.00000 |
| HETATM | 111 | Pt | 5.42678  | 14.16062 | 17.26536 | Pt | 0 | 0 | 0.00000 |
| HETATM | 112 | Pt | 12.67856 | 26.72108 | 17.26536 | Pt | 0 | 0 | 0.00000 |
| HETATM | 113 | Pt | 12.67856 | 9.97380  | 17.26536 | Pt | 0 | 0 | 0.00000 |
| HETATM | 114 | Pt | 12.67856 | 18.34744 | 17.26536 | Pt | 0 | 0 | 0.00000 |
| HETATM | 115 | Pt | 19.93035 | 30.90790 | 17.26536 | Pt | 0 | 0 | 0.00000 |
| HETATM | 116 | Pt | 19.93035 | 14.16062 | 17.26536 | Pt | 0 | 0 | 0.00000 |
| HETATM | 117 | Pt | 19.93035 | 22.53426 | 17.26536 | Pt | 0 | 0 | 0.00000 |
| HETATM | 118 | Pt | 5.42678  | 25.32547 | 17.26536 | Pt | 0 | 0 | 0.00000 |
| HETATM | 119 | Pt | 5.42678  | 8.57819  | 17.26536 | Pt | 0 | 0 | 0.00000 |
| HETATM | 120 | Pt | 5.42678  | 16.95183 | 17.26536 | Pt | 0 | 0 | 0.00000 |
| HETATM | 121 | Pt | 12.67856 | 29.51229 | 17.26536 | Pt | 0 | 0 | 0.00000 |
| HETATM | 122 | Pt | 12.67856 | 12.76501 | 17.26536 | Pt | 0 | 0 | 0.00000 |
| HETATM | 123 | Pt | 12.67856 | 21.13865 | 17.26536 | Pt | 0 | 0 | 0.00000 |
| HETATM | 124 | Pt | 19.93035 | 33.69911 | 17.26536 | Pt | 0 | 0 | 0.00000 |
| HETATM | 125 | Pt | 19.93035 | 16.95183 | 17.26536 | Pt | 0 | 0 | 0.00000 |
| HETATM | 126 | Pt | 19.93035 | 25.32547 | 17.26536 | Pt | 0 | 0 | 0.00000 |
| HETATM | 127 | Pt | 5.42678  | 28.11669 | 17.26536 | Pt | 0 | 0 | 0.00000 |
| HETATM | 128 | Pt | 5.42678  | 11.36941 | 17.26536 | Pt | 0 | 0 | 0.00000 |
| HETATM | 129 | Pt | 5.42678  | 19.74305 | 17.26536 | Pt | 0 | 0 | 0.00000 |
| HETATM | 130 | Pt | 12.67856 | 32.30351 | 17.26536 | Pt | 0 | 0 | 0.00000 |
| HETATM | 131 | Pt | 12.67856 | 15.55623 | 17.26536 | Pt | 0 | 0 | 0.00000 |
| HETATM | 132 | Pt | 12.67856 | 23.92987 | 17.26536 | Pt | 0 | 0 | 0.00000 |
| HETATM | 133 | Pt | 19.93035 | 36.49033 | 17.26536 | Pt | 0 | 0 | 0.00000 |
| HETATM | 134 | Pt | 19.93035 | 19.74305 | 17.26536 | Pt | 0 | 0 | 0.00000 |
| HETATM | 135 | Pt | 19.93035 | 28.11669 | 17.26536 | Pt | 0 | 0 | 0.00000 |
| HETATM | 136 | Pt | 7.84404  | 23.92987 | 17.26536 | Pt | 0 | 0 | 0.00000 |
| HETATM | 137 | Pt | 7.84404  | 7.18259  | 17.26536 | Pt | 0 | 0 | 0.00000 |
| HETATM | 138 | Pt | 7.84404  | 15.55623 | 17.26536 | Pt | 0 | 0 | 0.00000 |
| HETATM | 139 | Pt | 15.09582 | 28.11669 | 17.26536 | Pt | 0 | 0 | 0.00000 |
| HETATM | 140 | Pt | 15.09582 | 11.36941 | 17.26536 | Pt | 0 | 0 | 0.00000 |
| HETATM | 141 | Pt | 15.09582 | 19.74305 | 17.26536 | Pt | 0 | 0 | 0.00000 |
| HETATM | 142 | Pt | 0.59226  | 19.74305 | 17.26536 | Pt | 0 | 0 | 0.00000 |
| HETATM | 143 | Pt | 0.59226  | 2.99577  | 17.26536 | Pt | 0 | 0 | 0.00000 |
| HETATM | 144 | Pt | 0.59226  | 11.36941 | 17.26536 | Pt | 0 | 0 | 0.00000 |
| HETATM | 145 | Pt | 7.84404  | 26.72108 | 17.26536 | Pt | 0 | 0 | 0.00000 |
| HETATM | 146 | Pt | 7.84404  | 9.97380  | 17.26536 | Pt | 0 | 0 | 0.00000 |
| HETATM | 147 | Pt | 7.84404  | 18.34744 | 17.26536 | Pt | 0 | 0 | 0.00000 |
| HETATM | 148 | Pt | 15.09582 | 30.90790 | 17.26536 | Pt | 0 | 0 | 0.00000 |
| HETATM | 149 | Pt | 15.09582 | 14.16062 | 17.26536 | Pt | 0 | 0 | 0.00000 |
| HETATM | 150 | Pt | 15.09582 | 22.53426 | 17.26536 | Pt | 0 | 0 | 0.00000 |
| HETATM | 151 | Pt | 0.59226  | 22.53426 | 17.26536 | Pt | 0 | 0 | 0.00000 |
| HETATM | 152 | Pt | 0.59226  | 5.78698  | 17.26536 | Pt | 0 | 0 | 0.00000 |
| HETATM | 153 | Pt | 0.59226  | 14.16062 | 17.26536 | Pt | 0 | 0 | 0.00000 |
| HETATM | 154 | Pt | 7.84404  | 29.51229 | 17.26536 | Pt | 0 | 0 | 0.00000 |
| HETATM | 155 | Pt | 7.84404  | 12.76501 | 17.26536 | Pt | 0 | 0 | 0.00000 |
| HETATM | 156 | Pt | 7.84404  | 21.13865 | 17.26536 | Pt | 0 | 0 | 0.00000 |
| HETATM | 157 | Pt | 15.09582 | 33.69911 | 17.26536 | Pt | 0 | 0 | 0.00000 |
| HETATM | 158 | Pt | 15.09582 | 16.95183 | 17.26536 | Pt | 0 | 0 | 0.00000 |
| HETATM | 159 | Pt | 15.09582 | 25.32547 | 17.26536 | Pt | 0 | 0 | 0.00000 |
| HETATM | 160 | Pt | 0.59226  | 25.32547 | 17.26536 | Pt | 0 | 0 | 0.00000 |
| HETATM | 161 | Pt | 0.59226  | 8.57819  | 17.26536 | Pt | 0 | 0 | 0.00000 |
| HETATM | 162 | Pt | 0.59226  | 16.95183 | 17.26536 | Pt | 0 | 0 | 0.00000 |
| HETATM | 163 | Pt | 3.81497  | 22.53395 | 19.54450 | Pt | 0 | 0 | 0.00000 |
| HETATM | 164 | Pt | 3.81505  | 5.78680  | 19.54428 | Pt | 0 | 0 | 0.00000 |

|        |     |    |          |          |          |    |   |   |         |
|--------|-----|----|----------|----------|----------|----|---|---|---------|
| HETATM | 165 | Pt | 3.81518  | 14.16047 | 19.54512 | Pt | 0 | 0 | 0.00000 |
| HETATM | 166 | Pt | 11.06714 | 26.72081 | 19.54468 | Pt | 0 | 0 | 0.00000 |
| HETATM | 167 | Pt | 11.06707 | 9.97356  | 19.54494 | Pt | 0 | 0 | 0.00000 |
| HETATM | 168 | Pt | 11.06712 | 18.34747 | 19.54342 | Pt | 0 | 0 | 0.00000 |
| HETATM | 169 | Pt | 18.31868 | 30.90765 | 19.54462 | Pt | 0 | 0 | 0.00000 |
| HETATM | 170 | Pt | 18.31885 | 14.16026 | 19.54443 | Pt | 0 | 0 | 0.00000 |
| HETATM | 171 | Pt | 18.31859 | 22.53409 | 19.54482 | Pt | 0 | 0 | 0.00000 |
| HETATM | 172 | Pt | 3.81524  | 25.32549 | 19.54316 | Pt | 0 | 0 | 0.00000 |
| HETATM | 173 | Pt | 3.81524  | 8.57834  | 19.54351 | Pt | 0 | 0 | 0.00000 |
| HETATM | 174 | Pt | 3.81544  | 16.95169 | 19.54396 | Pt | 0 | 0 | 0.00000 |
| HETATM | 175 | Pt | 11.06736 | 29.51238 | 19.54360 | Pt | 0 | 0 | 0.00000 |
| HETATM | 176 | Pt | 11.06714 | 12.76472 | 19.54337 | Pt | 0 | 0 | 0.00000 |
| HETATM | 177 | Pt | 11.06725 | 21.13875 | 19.54339 | Pt | 0 | 0 | 0.00000 |
| HETATM | 178 | Pt | 18.31877 | 33.69907 | 19.54364 | Pt | 0 | 0 | 0.00000 |
| HETATM | 179 | Pt | 18.31910 | 16.95193 | 19.54336 | Pt | 0 | 0 | 0.00000 |
| HETATM | 180 | Pt | 18.31891 | 25.32549 | 19.54356 | Pt | 0 | 0 | 0.00000 |
| HETATM | 181 | Pt | 3.81513  | 2.99602  | 19.54420 | Pt | 0 | 0 | 0.00000 |
| HETATM | 182 | Pt | 3.81508  | 11.36982 | 19.54494 | Pt | 0 | 0 | 0.00000 |
| HETATM | 183 | Pt | 3.81515  | 19.74302 | 19.54484 | Pt | 0 | 0 | 0.00000 |
| HETATM | 184 | Pt | 11.06714 | 7.18299  | 19.54495 | Pt | 0 | 0 | 0.00000 |
| HETATM | 185 | Pt | 11.06706 | 15.55624 | 19.54347 | Pt | 0 | 0 | 0.00000 |
| HETATM | 186 | Pt | 11.06713 | 23.92996 | 19.54482 | Pt | 0 | 0 | 0.00000 |
| HETATM | 187 | Pt | 18.31845 | 11.36953 | 19.54493 | Pt | 0 | 0 | 0.00000 |
| HETATM | 188 | Pt | 18.31857 | 19.74342 | 19.54495 | Pt | 0 | 0 | 0.00000 |
| HETATM | 189 | Pt | 18.31872 | 28.11691 | 19.54459 | Pt | 0 | 0 | 0.00000 |
| HETATM | 190 | Pt | 6.23234  | 23.93019 | 19.54305 | Pt | 0 | 0 | 0.00000 |
| HETATM | 191 | Pt | 6.23241  | 7.18252  | 19.54314 | Pt | 0 | 0 | 0.00000 |
| HETATM | 192 | Pt | 6.23235  | 15.55612 | 19.54370 | Pt | 0 | 0 | 0.00000 |
| HETATM | 193 | Pt | 13.48440 | 28.11677 | 19.54353 | Pt | 0 | 0 | 0.00000 |
| HETATM | 194 | Pt | 13.48430 | 11.36944 | 19.54408 | Pt | 0 | 0 | 0.00000 |
| HETATM | 195 | Pt | 13.48450 | 19.74316 | 19.54370 | Pt | 0 | 0 | 0.00000 |
| HETATM | 196 | Pt | 20.73599 | 32.30348 | 19.54355 | Pt | 0 | 0 | 0.00000 |
| HETATM | 197 | Pt | 20.73623 | 15.55629 | 19.54314 | Pt | 0 | 0 | 0.00000 |
| HETATM | 198 | Pt | 20.73600 | 23.93005 | 19.54365 | Pt | 0 | 0 | 0.00000 |
| HETATM | 199 | Pt | 6.23253  | 26.72112 | 19.54315 | Pt | 0 | 0 | 0.00000 |
| HETATM | 200 | Pt | 6.23232  | 9.97362  | 19.54336 | Pt | 0 | 0 | 0.00000 |
| HETATM | 201 | Pt | 6.23234  | 18.34732 | 19.54340 | Pt | 0 | 0 | 0.00000 |
| HETATM | 202 | Pt | 13.48439 | 30.90794 | 19.54366 | Pt | 0 | 0 | 0.00000 |
| HETATM | 203 | Pt | 13.48453 | 14.16041 | 19.54335 | Pt | 0 | 0 | 0.00000 |
| HETATM | 204 | Pt | 13.48436 | 22.53404 | 19.54395 | Pt | 0 | 0 | 0.00000 |
| HETATM | 205 | Pt | 20.73588 | 35.09449 | 19.54360 | Pt | 0 | 0 | 0.00000 |
| HETATM | 206 | Pt | 20.73599 | 18.34754 | 19.54351 | Pt | 0 | 0 | 0.00000 |
| HETATM | 207 | Pt | 20.73606 | 26.72104 | 19.54356 | Pt | 0 | 0 | 0.00000 |
| HETATM | 208 | Pt | 6.23231  | 4.39136  | 19.54420 | Pt | 0 | 0 | 0.00000 |
| HETATM | 209 | Pt | 6.23199  | 12.76483 | 19.54462 | Pt | 0 | 0 | 0.00000 |
| HETATM | 210 | Pt | 6.23193  | 21.13893 | 19.54402 | Pt | 0 | 0 | 0.00000 |
| HETATM | 211 | Pt | 13.48409 | 8.57834  | 19.54508 | Pt | 0 | 0 | 0.00000 |
| HETATM | 212 | Pt | 13.48467 | 16.95191 | 19.54377 | Pt | 0 | 0 | 0.00000 |
| HETATM | 213 | Pt | 13.48413 | 25.32539 | 19.54461 | Pt | 0 | 0 | 0.00000 |
| HETATM | 214 | Pt | 20.73570 | 12.76485 | 19.54449 | Pt | 0 | 0 | 0.00000 |
| HETATM | 215 | Pt | 20.73566 | 21.13883 | 19.54473 | Pt | 0 | 0 | 0.00000 |
| HETATM | 216 | Pt | 20.73580 | 29.51226 | 19.54454 | Pt | 0 | 0 | 0.00000 |
| HETATM | 217 | Pt | 8.65021  | 25.32558 | 19.54448 | Pt | 0 | 0 | 0.00000 |
| HETATM | 218 | Pt | 8.65011  | 8.57801  | 19.54444 | Pt | 0 | 0 | 0.00000 |
| HETATM | 219 | Pt | 8.64974  | 16.95178 | 19.54341 | Pt | 0 | 0 | 0.00000 |
| HETATM | 220 | Pt | 15.90187 | 29.51230 | 19.54462 | Pt | 0 | 0 | 0.00000 |
| HETATM | 221 | Pt | 15.90178 | 12.76488 | 19.54492 | Pt | 0 | 0 | 0.00000 |
| HETATM | 222 | Pt | 15.90175 | 21.13865 | 19.54513 | Pt | 0 | 0 | 0.00000 |
| HETATM | 223 | Pt | 1.39821  | 21.13845 | 19.54471 | Pt | 0 | 0 | 0.00000 |
| HETATM | 224 | Pt | 1.39828  | 4.39146  | 19.54429 | Pt | 0 | 0 | 0.00000 |
| HETATM | 225 | Pt | 1.39828  | 12.76515 | 19.54481 | Pt | 0 | 0 | 0.00000 |
| HETATM | 226 | Pt | 8.65016  | 28.11648 | 19.54443 | Pt | 0 | 0 | 0.00000 |
| HETATM | 227 | Pt | 8.64975  | 11.36872 | 19.54420 | Pt | 0 | 0 | 0.00000 |

|        |     |    |          |          |          |    |   |   |         |
|--------|-----|----|----------|----------|----------|----|---|---|---------|
| HETATM | 228 | Pt | 8.64963  | 19.74331 | 19.54334 | Pt | 0 | 0 | 0.00000 |
| HETATM | 229 | Pt | 15.90170 | 32.30328 | 19.54467 | Pt | 0 | 0 | 0.00000 |
| HETATM | 230 | Pt | 15.90220 | 15.55593 | 19.54419 | Pt | 0 | 0 | 0.00000 |
| HETATM | 231 | Pt | 15.90172 | 23.92958 | 19.54466 | Pt | 0 | 0 | 0.00000 |
| HETATM | 232 | Pt | 1.39802  | 23.92944 | 19.54446 | Pt | 0 | 0 | 0.00000 |
| HETATM | 233 | Pt | 1.39803  | 7.18254  | 19.54452 | Pt | 0 | 0 | 0.00000 |
| HETATM | 234 | Pt | 1.39819  | 15.55597 | 19.54467 | Pt | 0 | 0 | 0.00000 |
| HETATM | 235 | Pt | 8.65014  | 5.78726  | 19.54449 | Pt | 0 | 0 | 0.00000 |
| HETATM | 236 | Pt | 8.64956  | 14.16034 | 19.54377 | Pt | 0 | 0 | 0.00000 |
| HETATM | 237 | Pt | 8.64984  | 22.53492 | 19.54400 | Pt | 0 | 0 | 0.00000 |
| HETATM | 238 | Pt | 15.90156 | 9.97407  | 19.54505 | Pt | 0 | 0 | 0.00000 |
| HETATM | 239 | Pt | 15.90201 | 18.34783 | 19.54464 | Pt | 0 | 0 | 0.00000 |
| HETATM | 240 | Pt | 15.90177 | 26.72131 | 19.54452 | Pt | 0 | 0 | 0.00000 |
| HETATM | 241 | Pt | 1.39815  | 1.60034  | 19.54422 | Pt | 0 | 0 | 0.00000 |
| HETATM | 242 | Pt | 1.39807  | 9.97428  | 19.54472 | Pt | 0 | 0 | 0.00000 |
| HETATM | 243 | Pt | 1.39818  | 18.34757 | 19.54463 | Pt | 0 | 0 | 0.00000 |
| HETATM | 244 | Pt | 2.20431  | 19.74342 | 21.82544 | Pt | 0 | 0 | 0.00000 |
| HETATM | 245 | Pt | 2.20427  | 2.99649  | 21.82437 | Pt | 0 | 0 | 0.00000 |
| HETATM | 246 | Pt | 2.20426  | 11.37062 | 21.82566 | Pt | 0 | 0 | 0.00000 |
| HETATM | 247 | Pt | 9.45625  | 23.93064 | 21.82497 | Pt | 0 | 0 | 0.00000 |
| HETATM | 248 | Pt | 9.45625  | 7.18347  | 21.82533 | Pt | 0 | 0 | 0.00000 |
| HETATM | 249 | Pt | 9.45536  | 15.55618 | 21.82174 | Pt | 0 | 0 | 0.00000 |
| HETATM | 250 | Pt | 16.70781 | 28.11743 | 21.82511 | Pt | 0 | 0 | 0.00000 |
| HETATM | 251 | Pt | 16.70719 | 11.37016 | 21.82634 | Pt | 0 | 0 | 0.00000 |
| HETATM | 252 | Pt | 16.70728 | 19.74393 | 21.82630 | Pt | 0 | 0 | 0.00000 |
| HETATM | 253 | Pt | 2.20411  | 22.53320 | 21.82511 | Pt | 0 | 0 | 0.00000 |
| HETATM | 254 | Pt | 2.20412  | 5.78635  | 21.82463 | Pt | 0 | 0 | 0.00000 |
| HETATM | 255 | Pt | 2.20431  | 14.16011 | 21.82568 | Pt | 0 | 0 | 0.00000 |
| HETATM | 256 | Pt | 9.45631  | 26.72025 | 21.82504 | Pt | 0 | 0 | 0.00000 |
| HETATM | 257 | Pt | 9.45608  | 9.97267  | 21.82486 | Pt | 0 | 0 | 0.00000 |
| HETATM | 258 | Pt | 9.45546  | 18.34758 | 21.82118 | Pt | 0 | 0 | 0.00000 |
| HETATM | 259 | Pt | 16.70777 | 30.90712 | 21.82521 | Pt | 0 | 0 | 0.00000 |
| HETATM | 260 | Pt | 16.70806 | 14.15961 | 21.82483 | Pt | 0 | 0 | 0.00000 |
| HETATM | 261 | Pt | 16.70752 | 22.53354 | 21.82569 | Pt | 0 | 0 | 0.00000 |
| HETATM | 262 | Pt | 2.20492  | 25.32530 | 21.82158 | Pt | 0 | 0 | 0.00000 |
| HETATM | 263 | Pt | 2.20486  | 8.57856  | 21.82221 | Pt | 0 | 0 | 0.00000 |
| HETATM | 264 | Pt | 2.20510  | 16.95172 | 21.82249 | Pt | 0 | 0 | 0.00000 |
| HETATM | 265 | Pt | 9.45710  | 29.51235 | 21.82203 | Pt | 0 | 0 | 0.00000 |
| HETATM | 266 | Pt | 9.45631  | 12.76407 | 21.82095 | Pt | 0 | 0 | 0.00000 |
| HETATM | 267 | Pt | 9.45637  | 21.13948 | 21.82061 | Pt | 0 | 0 | 0.00000 |
| HETATM | 268 | Pt | 16.70833 | 33.69910 | 21.82260 | Pt | 0 | 0 | 0.00000 |
| HETATM | 269 | Pt | 16.70873 | 16.95191 | 21.82194 | Pt | 0 | 0 | 0.00000 |
| HETATM | 270 | Pt | 16.70853 | 25.32548 | 21.82220 | Pt | 0 | 0 | 0.00000 |
| HETATM | 271 | Pt | 4.62000  | 21.13843 | 21.82503 | Pt | 0 | 0 | 0.00000 |
| HETATM | 272 | Pt | 4.62014  | 4.39132  | 21.82436 | Pt | 0 | 0 | 0.00000 |
| HETATM | 273 | Pt | 4.62029  | 12.76550 | 21.82627 | Pt | 0 | 0 | 0.00000 |
| HETATM | 274 | Pt | 11.87223 | 25.32518 | 21.82538 | Pt | 0 | 0 | 0.00000 |
| HETATM | 275 | Pt | 11.87223 | 8.57869  | 21.82638 | Pt | 0 | 0 | 0.00000 |
| HETATM | 276 | Pt | 11.87295 | 16.95199 | 21.82175 | Pt | 0 | 0 | 0.00000 |
| HETATM | 277 | Pt | 19.12371 | 29.51226 | 21.82511 | Pt | 0 | 0 | 0.00000 |
| HETATM | 278 | Pt | 19.12348 | 12.76484 | 21.82531 | Pt | 0 | 0 | 0.00000 |
| HETATM | 279 | Pt | 19.12330 | 21.13883 | 21.82567 | Pt | 0 | 0 | 0.00000 |
| HETATM | 280 | Pt | 4.62070  | 23.92977 | 21.82118 | Pt | 0 | 0 | 0.00000 |
| HETATM | 281 | Pt | 4.62071  | 7.18233  | 21.82132 | Pt | 0 | 0 | 0.00000 |
| HETATM | 282 | Pt | 4.62126  | 15.55607 | 21.82332 | Pt | 0 | 0 | 0.00000 |
| HETATM | 283 | Pt | 11.87298 | 28.11648 | 21.82197 | Pt | 0 | 0 | 0.00000 |
| HETATM | 284 | Pt | 11.87290 | 11.36932 | 21.82293 | Pt | 0 | 0 | 0.00000 |
| HETATM | 285 | Pt | 11.87292 | 19.74278 | 21.82156 | Pt | 0 | 0 | 0.00000 |
| HETATM | 286 | Pt | 19.12436 | 32.30323 | 21.82197 | Pt | 0 | 0 | 0.00000 |
| HETATM | 287 | Pt | 19.12502 | 15.55600 | 21.82100 | Pt | 0 | 0 | 0.00000 |
| HETATM | 288 | Pt | 19.12434 | 23.92978 | 21.82212 | Pt | 0 | 0 | 0.00000 |
| HETATM | 289 | Pt | 4.62089  | 26.72132 | 21.82108 | Pt | 0 | 0 | 0.00000 |
| HETATM | 290 | Pt | 4.62091  | 9.97431  | 21.82204 | Pt | 0 | 0 | 0.00000 |

|        |     |    |          |          |          |    |   |   |         |
|--------|-----|----|----------|----------|----------|----|---|---|---------|
| HETATM | 291 | Pt | 4.62128  | 18.34714 | 21.82281 | Pt | 0 | 0 | 0.00000 |
| HETATM | 292 | Pt | 11.87301 | 30.90835 | 21.82224 | Pt | 0 | 0 | 0.00000 |
| HETATM | 293 | Pt | 11.87290 | 14.16048 | 21.82081 | Pt | 0 | 0 | 0.00000 |
| HETATM | 294 | Pt | 11.87295 | 22.53388 | 21.82278 | Pt | 0 | 0 | 0.00000 |
| HETATM | 295 | Pt | 19.12410 | 35.09477 | 21.82221 | Pt | 0 | 0 | 0.00000 |
| HETATM | 296 | Pt | 19.12421 | 18.34779 | 21.82206 | Pt | 0 | 0 | 0.00000 |
| HETATM | 297 | Pt | 19.12447 | 26.72130 | 21.82193 | Pt | 0 | 0 | 0.00000 |
| HETATM | 298 | Pt | 7.03737  | 22.53585 | 21.82103 | Pt | 0 | 0 | 0.00000 |
| HETATM | 299 | Pt | 7.03775  | 5.78785  | 21.82155 | Pt | 0 | 0 | 0.00000 |
| HETATM | 300 | Pt | 7.03733  | 14.16119 | 21.82222 | Pt | 0 | 0 | 0.00000 |
| HETATM | 301 | Pt | 14.28958 | 26.72206 | 21.82212 | Pt | 0 | 0 | 0.00000 |
| HETATM | 302 | Pt | 14.28931 | 9.97511  | 21.82370 | Pt | 0 | 0 | 0.00000 |
| HETATM | 303 | Pt | 14.29006 | 18.34856 | 21.82224 | Pt | 0 | 0 | 0.00000 |
| HETATM | 304 | Pt | 21.54125 | 30.90883 | 21.82216 | Pt | 0 | 0 | 0.00000 |
| HETATM | 305 | Pt | 21.54139 | 14.16150 | 21.82154 | Pt | 0 | 0 | 0.00000 |
| HETATM | 306 | Pt | 21.54108 | 22.53562 | 21.82248 | Pt | 0 | 0 | 0.00000 |
| HETATM | 307 | Pt | 7.03853  | 25.32572 | 21.82114 | Pt | 0 | 0 | 0.00000 |
| HETATM | 308 | Pt | 7.03827  | 8.57772  | 21.82101 | Pt | 0 | 0 | 0.00000 |
| HETATM | 309 | Pt | 7.03847  | 16.95160 | 21.82156 | Pt | 0 | 0 | 0.00000 |
| HETATM | 310 | Pt | 14.29043 | 29.51234 | 21.82197 | Pt | 0 | 0 | 0.00000 |
| HETATM | 311 | Pt | 14.29011 | 12.76490 | 21.82290 | Pt | 0 | 0 | 0.00000 |
| HETATM | 312 | Pt | 14.29009 | 21.13837 | 21.82332 | Pt | 0 | 0 | 0.00000 |
| HETATM | 313 | Pt | 21.54196 | 33.69887 | 21.82201 | Pt | 0 | 0 | 0.00000 |
| HETATM | 314 | Pt | 21.54223 | 16.95196 | 21.82132 | Pt | 0 | 0 | 0.00000 |
| HETATM | 315 | Pt | 21.54206 | 25.32566 | 21.82212 | Pt | 0 | 0 | 0.00000 |
| HETATM | 316 | Pt | 7.03785  | 28.11561 | 21.82154 | Pt | 0 | 0 | 0.00000 |
| HETATM | 317 | Pt | 7.03752  | 11.36823 | 21.82194 | Pt | 0 | 0 | 0.00000 |
| HETATM | 318 | Pt | 7.03715  | 19.74274 | 21.82064 | Pt | 0 | 0 | 0.00000 |
| HETATM | 319 | Pt | 14.28958 | 32.30264 | 21.82262 | Pt | 0 | 0 | 0.00000 |
| HETATM | 320 | Pt | 14.29051 | 15.55512 | 21.82094 | Pt | 0 | 0 | 0.00000 |
| HETATM | 321 | Pt | 14.28952 | 23.92865 | 21.82246 | Pt | 0 | 0 | 0.00000 |
| HETATM | 322 | Pt | 21.54105 | 36.48900 | 21.82206 | Pt | 0 | 0 | 0.00000 |
| HETATM | 323 | Pt | 21.54099 | 19.74228 | 21.82223 | Pt | 0 | 0 | 0.00000 |
| HETATM | 324 | Pt | 21.54126 | 28.11567 | 21.82220 | Pt | 0 | 0 | 0.00000 |
| HETATM | 325 | Pt | 3.00982  | 21.13813 | 24.11236 | Pt | 0 | 0 | 0.00000 |
| HETATM | 326 | Pt | 3.00958  | 4.39127  | 24.11114 | Pt | 0 | 0 | 0.00000 |
| HETATM | 327 | Pt | 3.01018  | 12.76596 | 24.11338 | Pt | 0 | 0 | 0.00000 |
| HETATM | 328 | Pt | 10.26160 | 25.32496 | 24.11225 | Pt | 0 | 0 | 0.00000 |
| HETATM | 329 | Pt | 10.26150 | 8.57870  | 24.11331 | Pt | 0 | 0 | 0.00000 |
| HETATM | 330 | Pt | 10.26118 | 16.95204 | 24.10082 | Pt | 0 | 0 | 0.00000 |
| HETATM | 331 | Pt | 17.51312 | 29.51224 | 24.11220 | Pt | 0 | 0 | 0.00000 |
| HETATM | 332 | Pt | 17.51255 | 12.76510 | 24.11324 | Pt | 0 | 0 | 0.00000 |
| HETATM | 333 | Pt | 17.51195 | 21.13856 | 24.11340 | Pt | 0 | 0 | 0.00000 |
| HETATM | 334 | Pt | 3.01092  | 23.92761 | 24.10198 | Pt | 0 | 0 | 0.00000 |
| HETATM | 335 | Pt | 3.01068  | 7.18060  | 24.10197 | Pt | 0 | 0 | 0.00000 |
| HETATM | 336 | Pt | 3.01143  | 15.55451 | 24.10368 | Pt | 0 | 0 | 0.00000 |
| HETATM | 337 | Pt | 10.26303 | 28.11446 | 24.10246 | Pt | 0 | 0 | 0.00000 |
| HETATM | 338 | Pt | 10.26292 | 11.36695 | 24.10232 | Pt | 0 | 0 | 0.00000 |
| HETATM | 339 | Pt | 10.26125 | 19.74266 | 24.09847 | Pt | 0 | 0 | 0.00000 |
| HETATM | 340 | Pt | 17.51436 | 32.30144 | 24.10278 | Pt | 0 | 0 | 0.00000 |
| HETATM | 341 | Pt | 17.51600 | 15.55427 | 24.10034 | Pt | 0 | 0 | 0.00000 |
| HETATM | 342 | Pt | 17.51417 | 23.92781 | 24.10291 | Pt | 0 | 0 | 0.00000 |
| HETATM | 343 | Pt | 3.01103  | 26.72300 | 24.10152 | Pt | 0 | 0 | 0.00000 |
| HETATM | 344 | Pt | 3.01109  | 9.97646  | 24.10285 | Pt | 0 | 0 | 0.00000 |
| HETATM | 345 | Pt | 3.01152  | 18.34889 | 24.10335 | Pt | 0 | 0 | 0.00000 |
| HETATM | 346 | Pt | 10.26303 | 30.91008 | 24.10265 | Pt | 0 | 0 | 0.00000 |
| HETATM | 347 | Pt | 10.26161 | 14.16125 | 24.09828 | Pt | 0 | 0 | 0.00000 |
| HETATM | 348 | Pt | 10.26317 | 22.53577 | 24.10289 | Pt | 0 | 0 | 0.00000 |
| HETATM | 349 | Pt | 17.51381 | 35.09680 | 24.10344 | Pt | 0 | 0 | 0.00000 |
| HETATM | 350 | Pt | 17.51352 | 18.34932 | 24.10317 | Pt | 0 | 0 | 0.00000 |
| HETATM | 351 | Pt | 17.51447 | 26.72308 | 24.10259 | Pt | 0 | 0 | 0.00000 |
| HETATM | 352 | Pt | 5.42406  | 22.53476 | 24.10122 | Pt | 0 | 0 | 0.00000 |
| HETATM | 353 | Pt | 5.42417  | 5.78676  | 24.10153 | Pt | 0 | 0 | 0.00000 |

|        |     |    |          |          |          |    |   |   |         |
|--------|-----|----|----------|----------|----------|----|---|---|---------|
| HETATM | 354 | Pt | 5.42535  | 14.16216 | 24.10579 | Pt | 0 | 0 | 0.00000 |
| HETATM | 355 | Pt | 12.67632 | 26.72095 | 24.10263 | Pt | 0 | 0 | 0.00000 |
| HETATM | 356 | Pt | 12.67622 | 9.97524  | 24.10599 | Pt | 0 | 0 | 0.00000 |
| HETATM | 357 | Pt | 12.67734 | 18.34702 | 24.10161 | Pt | 0 | 0 | 0.00000 |
| HETATM | 358 | Pt | 19.92791 | 30.90802 | 24.10257 | Pt | 0 | 0 | 0.00000 |
| HETATM | 359 | Pt | 19.92847 | 14.16062 | 24.10180 | Pt | 0 | 0 | 0.00000 |
| HETATM | 360 | Pt | 19.92741 | 22.53461 | 24.10308 | Pt | 0 | 0 | 0.00000 |
| HETATM | 361 | Pt | 5.42665  | 25.32569 | 24.09651 | Pt | 0 | 0 | 0.00000 |
| HETATM | 362 | Pt | 5.42631  | 8.57777  | 24.09679 | Pt | 0 | 0 | 0.00000 |
| HETATM | 363 | Pt | 5.42841  | 16.95127 | 24.10068 | Pt | 0 | 0 | 0.00000 |
| HETATM | 364 | Pt | 12.67879 | 29.51238 | 24.09787 | Pt | 0 | 0 | 0.00000 |
| HETATM | 365 | Pt | 12.67820 | 12.76566 | 24.10011 | Pt | 0 | 0 | 0.00000 |
| HETATM | 366 | Pt | 12.67825 | 21.13695 | 24.10067 | Pt | 0 | 0 | 0.00000 |
| HETATM | 367 | Pt | 19.93016 | 33.69896 | 24.09786 | Pt | 0 | 0 | 0.00000 |
| HETATM | 368 | Pt | 19.93095 | 16.95203 | 24.09680 | Pt | 0 | 0 | 0.00000 |
| HETATM | 369 | Pt | 19.93028 | 25.32558 | 24.09789 | Pt | 0 | 0 | 0.00000 |
| HETATM | 370 | Pt | 5.42437  | 28.11635 | 24.10148 | Pt | 0 | 0 | 0.00000 |
| HETATM | 371 | Pt | 5.42495  | 11.36997 | 24.10315 | Pt | 0 | 0 | 0.00000 |
| HETATM | 372 | Pt | 5.42453  | 19.74218 | 24.10296 | Pt | 0 | 0 | 0.00000 |
| HETATM | 373 | Pt | 12.67641 | 32.30391 | 24.10349 | Pt | 0 | 0 | 0.00000 |
| HETATM | 374 | Pt | 12.67788 | 15.55630 | 24.09828 | Pt | 0 | 0 | 0.00000 |
| HETATM | 375 | Pt | 12.67631 | 23.92884 | 24.10328 | Pt | 0 | 0 | 0.00000 |
| HETATM | 376 | Pt | 19.92760 | 36.48991 | 24.10264 | Pt | 0 | 0 | 0.00000 |
| HETATM | 377 | Pt | 19.92726 | 19.74301 | 24.10287 | Pt | 0 | 0 | 0.00000 |
| HETATM | 378 | Pt | 19.92793 | 28.11650 | 24.10258 | Pt | 0 | 0 | 0.00000 |
| HETATM | 379 | Pt | 7.84497  | 23.93247 | 24.10117 | Pt | 0 | 0 | 0.00000 |
| HETATM | 380 | Pt | 7.84499  | 7.18423  | 24.10183 | Pt | 0 | 0 | 0.00000 |
| HETATM | 381 | Pt | 7.84502  | 15.55708 | 24.10159 | Pt | 0 | 0 | 0.00000 |
| HETATM | 382 | Pt | 15.09695 | 28.11885 | 24.10254 | Pt | 0 | 0 | 0.00000 |
| HETATM | 383 | Pt | 15.09575 | 11.37216 | 24.10595 | Pt | 0 | 0 | 0.00000 |
| HETATM | 384 | Pt | 15.09522 | 19.74506 | 24.10582 | Pt | 0 | 0 | 0.00000 |
| HETATM | 385 | Pt | 0.59351  | 19.74494 | 24.10270 | Pt | 0 | 0 | 0.00000 |
| HETATM | 386 | Pt | 0.59375  | 2.99791  | 24.10152 | Pt | 0 | 0 | 0.00000 |
| HETATM | 387 | Pt | 0.59342  | 11.37213 | 24.10307 | Pt | 0 | 0 | 0.00000 |
| HETATM | 388 | Pt | 7.84529  | 26.71875 | 24.10189 | Pt | 0 | 0 | 0.00000 |
| HETATM | 389 | Pt | 7.84430  | 9.97030  | 24.10036 | Pt | 0 | 0 | 0.00000 |
| HETATM | 390 | Pt | 7.84440  | 18.34729 | 24.09850 | Pt | 0 | 0 | 0.00000 |
| HETATM | 391 | Pt | 15.09697 | 30.90576 | 24.10279 | Pt | 0 | 0 | 0.00000 |
| HETATM | 392 | Pt | 15.09715 | 14.15800 | 24.10228 | Pt | 0 | 0 | 0.00000 |
| HETATM | 393 | Pt | 15.09637 | 22.53175 | 24.10367 | Pt | 0 | 0 | 0.00000 |
| HETATM | 394 | Pt | 0.59334  | 22.53165 | 24.10253 | Pt | 0 | 0 | 0.00000 |
| HETATM | 395 | Pt | 0.59340  | 5.78497  | 24.10198 | Pt | 0 | 0 | 0.00000 |
| HETATM | 396 | Pt | 0.59349  | 14.15866 | 24.10289 | Pt | 0 | 0 | 0.00000 |
| HETATM | 397 | Pt | 7.84420  | 29.51193 | 24.09151 | Pt | 0 | 0 | 0.00000 |
| HETATM | 398 | Pt | 7.84456  | 12.76571 | 24.09266 | Pt | 0 | 0 | 0.00000 |
| HETATM | 399 | Pt | 7.84367  | 21.13931 | 24.09049 | Pt | 0 | 0 | 0.00000 |
| HETATM | 400 | Pt | 15.09563 | 33.69947 | 24.09350 | Pt | 0 | 0 | 0.00000 |
| HETATM | 401 | Pt | 15.09498 | 16.95173 | 24.09267 | Pt | 0 | 0 | 0.00000 |
| HETATM | 402 | Pt | 15.09578 | 25.32530 | 24.09237 | Pt | 0 | 0 | 0.00000 |
| HETATM | 403 | Pt | 0.59250  | 25.32515 | 24.09155 | Pt | 0 | 0 | 0.00000 |
| HETATM | 404 | Pt | 0.59202  | 8.57861  | 24.09247 | Pt | 0 | 0 | 0.00000 |
| HETATM | 405 | Pt | 0.59243  | 16.95180 | 24.09240 | Pt | 0 | 0 | 0.00000 |
| HETATM | 406 | Pt | 3.81352  | 22.53058 | 26.40041 | Pt | 0 | 0 | 0.00000 |
| HETATM | 407 | Pt | 3.81297  | 5.78295  | 26.39982 | Pt | 0 | 0 | 0.00000 |
| HETATM | 408 | Pt | 3.81606  | 14.15889 | 26.40340 | Pt | 0 | 0 | 0.00000 |
| HETATM | 409 | Pt | 11.06519 | 26.71670 | 26.40079 | Pt | 0 | 0 | 0.00000 |
| HETATM | 410 | Pt | 11.06403 | 9.97181  | 26.40470 | Pt | 0 | 0 | 0.00000 |
| HETATM | 411 | Pt | 11.05980 | 18.34534 | 26.38476 | Pt | 0 | 0 | 0.00000 |
| HETATM | 412 | Pt | 18.31684 | 30.90427 | 26.40094 | Pt | 0 | 0 | 0.00000 |
| HETATM | 413 | Pt | 18.31875 | 14.15707 | 26.40012 | Pt | 0 | 0 | 0.00000 |
| HETATM | 414 | Pt | 18.31554 | 22.53031 | 26.40170 | Pt | 0 | 0 | 0.00000 |
| HETATM | 415 | Pt | 3.81185  | 25.32553 | 26.37137 | Pt | 0 | 0 | 0.00000 |
| HETATM | 416 | Pt | 3.81118  | 8.57775  | 26.37181 | Pt | 0 | 0 | 0.00000 |



|        |     |    |          |          |          |    |   |   |         |
|--------|-----|----|----------|----------|----------|----|---|---|---------|
| HETATM | 417 | Pt | 3.81393  | 16.95173 | 26.37453 | Pt | 0 | 0 | 0.00000 |
| HETATM | 418 | Pt | 11.06380 | 29.51189 | 26.37246 | Pt | 0 | 0 | 0.00000 |
| HETATM | 419 | Pt | 11.06200 | 12.76750 | 26.37456 | Pt | 0 | 0 | 0.00000 |
| HETATM | 420 | Pt | 11.06352 | 21.13531 | 26.37572 | Pt | 0 | 0 | 0.00000 |
| HETATM | 421 | Pt | 18.31521 | 33.69909 | 26.37278 | Pt | 0 | 0 | 0.00000 |
| HETATM | 422 | Pt | 18.31773 | 16.95240 | 26.37112 | Pt | 0 | 0 | 0.00000 |
| HETATM | 423 | Pt | 18.31518 | 25.32527 | 26.37263 | Pt | 0 | 0 | 0.00000 |
| HETATM | 424 | Pt | 3.81335  | 2.99911  | 26.39971 | Pt | 0 | 0 | 0.00000 |
| HETATM | 425 | Pt | 3.81402  | 11.37379 | 26.40142 | Pt | 0 | 0 | 0.00000 |
| HETATM | 426 | Pt | 3.81475  | 19.74598 | 26.40155 | Pt | 0 | 0 | 0.00000 |
| HETATM | 427 | Pt | 11.06514 | 7.18627  | 26.40141 | Pt | 0 | 0 | 0.00000 |
| HETATM | 428 | Pt | 11.06531 | 15.55921 | 26.38306 | Pt | 0 | 0 | 0.00000 |
| HETATM | 429 | Pt | 11.06479 | 23.93178 | 26.40140 | Pt | 0 | 0 | 0.00000 |
| HETATM | 430 | Pt | 18.31662 | 11.37291 | 26.40133 | Pt | 0 | 0 | 0.00000 |
| HETATM | 431 | Pt | 18.31568 | 19.74633 | 26.40146 | Pt | 0 | 0 | 0.00000 |
| HETATM | 432 | Pt | 18.31688 | 28.12008 | 26.40092 | Pt | 0 | 0 | 0.00000 |
| HETATM | 433 | Pt | 6.23372  | 23.92782 | 26.37080 | Pt | 0 | 0 | 0.00000 |
| HETATM | 434 | Pt | 6.23350  | 7.17824  | 26.37122 | Pt | 0 | 0 | 0.00000 |
| HETATM | 435 | Pt | 6.24058  | 15.55619 | 26.38214 | Pt | 0 | 0 | 0.00000 |
| HETATM | 436 | Pt | 13.48609 | 28.11336 | 26.37245 | Pt | 0 | 0 | 0.00000 |
| HETATM | 437 | Pt | 13.48408 | 11.36976 | 26.38098 | Pt | 0 | 0 | 0.00000 |
| HETATM | 438 | Pt | 13.48037 | 19.73611 | 26.38217 | Pt | 0 | 0 | 0.00000 |
| HETATM | 439 | Pt | 20.73811 | 32.30030 | 26.37248 | Pt | 0 | 0 | 0.00000 |
| HETATM | 440 | Pt | 20.73940 | 15.55322 | 26.37120 | Pt | 0 | 0 | 0.00000 |
| HETATM | 441 | Pt | 20.73766 | 23.92717 | 26.37287 | Pt | 0 | 0 | 0.00000 |
| HETATM | 442 | Pt | 6.23419  | 26.72407 | 26.37131 | Pt | 0 | 0 | 0.00000 |
| HETATM | 443 | Pt | 6.23262  | 9.97503  | 26.37111 | Pt | 0 | 0 | 0.00000 |
| HETATM | 444 | Pt | 6.23722  | 18.34885 | 26.37579 | Pt | 0 | 0 | 0.00000 |
| HETATM | 445 | Pt | 13.48616 | 30.91104 | 26.37283 | Pt | 0 | 0 | 0.00000 |
| HETATM | 446 | Pt | 13.48470 | 14.16626 | 26.37455 | Pt | 0 | 0 | 0.00000 |
| HETATM | 447 | Pt | 13.48510 | 22.53536 | 26.37449 | Pt | 0 | 0 | 0.00000 |
| HETATM | 448 | Pt | 20.73811 | 35.09734 | 26.37248 | Pt | 0 | 0 | 0.00000 |
| HETATM | 449 | Pt | 20.73853 | 18.35077 | 26.37182 | Pt | 0 | 0 | 0.00000 |
| HETATM | 450 | Pt | 20.73809 | 26.72414 | 26.37261 | Pt | 0 | 0 | 0.00000 |
| HETATM | 451 | Pt | 6.24122  | 4.39070  | 26.36898 | Pt | 0 | 0 | 0.00000 |
| HETATM | 452 | Pt | 6.24423  | 12.76627 | 26.37120 | Pt | 0 | 0 | 0.00000 |
| HETATM | 453 | Pt | 6.24124  | 21.13979 | 26.36698 | Pt | 0 | 0 | 0.00000 |
| HETATM | 454 | Pt | 13.49261 | 8.57952  | 26.37238 | Pt | 0 | 0 | 0.00000 |
| HETATM | 455 | Pt | 13.48837 | 16.94809 | 26.37328 | Pt | 0 | 0 | 0.00000 |
| HETATM | 456 | Pt | 13.49292 | 25.32452 | 26.37034 | Pt | 0 | 0 | 0.00000 |
| HETATM | 457 | Pt | 20.74601 | 12.76461 | 26.36918 | Pt | 0 | 0 | 0.00000 |
| HETATM | 458 | Pt | 20.74436 | 21.13889 | 26.37045 | Pt | 0 | 0 | 0.00000 |
| HETATM | 459 | Pt | 20.74524 | 29.51224 | 26.37006 | Pt | 0 | 0 | 0.00000 |
| HETATM | 460 | Pt | 8.65387  | 25.32517 | 26.40027 | Pt | 0 | 0 | 0.00000 |
| HETATM | 461 | Pt | 8.65294  | 8.57650  | 26.40020 | Pt | 0 | 0 | 0.00000 |
| HETATM | 462 | Pt | 8.65523  | 16.95702 | 26.38478 | Pt | 0 | 0 | 0.00000 |
| HETATM | 463 | Pt | 15.90570 | 29.51220 | 26.40092 | Pt | 0 | 0 | 0.00000 |
| HETATM | 464 | Pt | 15.90480 | 12.76665 | 26.40461 | Pt | 0 | 0 | 0.00000 |
| HETATM | 465 | Pt | 15.90270 | 21.13711 | 26.40341 | Pt | 0 | 0 | 0.00000 |
| HETATM | 466 | Pt | 1.40276  | 21.13808 | 26.40095 | Pt | 0 | 0 | 0.00000 |
| HETATM | 467 | Pt | 1.40265  | 4.39134  | 26.39982 | Pt | 0 | 0 | 0.00000 |
| HETATM | 468 | Pt | 1.40308  | 12.76590 | 26.40166 | Pt | 0 | 0 | 0.00000 |
| HETATM | 469 | Pt | 8.64552  | 28.12373 | 26.36946 | Pt | 0 | 0 | 0.00000 |
| HETATM | 470 | Pt | 8.64233  | 11.37307 | 26.36352 | Pt | 0 | 0 | 0.00000 |
| HETATM | 471 | Pt | 8.64629  | 19.74913 | 26.37217 | Pt | 0 | 0 | 0.00000 |
| HETATM | 472 | Pt | 15.89695 | 32.31153 | 26.37050 | Pt | 0 | 0 | 0.00000 |
| HETATM | 473 | Pt | 15.90211 | 15.56457 | 26.36351 | Pt | 0 | 0 | 0.00000 |
| HETATM | 474 | Pt | 15.89644 | 23.93682 | 26.37054 | Pt | 0 | 0 | 0.00000 |
| HETATM | 475 | Pt | 1.39407  | 23.93709 | 26.36955 | Pt | 0 | 0 | 0.00000 |
| HETATM | 476 | Pt | 1.39352  | 7.19038  | 26.36968 | Pt | 0 | 0 | 0.00000 |
| HETATM | 477 | Pt | 1.39456  | 15.56416 | 26.37055 | Pt | 0 | 0 | 0.00000 |
| HETATM | 478 | Pt | 8.64520  | 5.77821  | 26.36918 | Pt | 0 | 0 | 0.00000 |
| HETATM | 479 | Pt | 8.65103  | 14.15525 | 26.37325 | Pt | 0 | 0 | 0.00000 |

|        |     |    |          |          |          |    |   |   |         |
|--------|-----|----|----------|----------|----------|----|---|---|---------|
| HETATM | 480 | Pt | 8.64448  | 22.52731 | 26.36691 | Pt | 0 | 0 | 0.00000 |
| HETATM | 481 | Pt | 15.89630 | 9.96729  | 26.37234 | Pt | 0 | 0 | 0.00000 |
| HETATM | 482 | Pt | 15.89464 | 18.33791 | 26.37124 | Pt | 0 | 0 | 0.00000 |
| HETATM | 483 | Pt | 15.89706 | 26.71313 | 26.37005 | Pt | 0 | 0 | 0.00000 |
| HETATM | 484 | Pt | 1.39426  | 1.59229  | 26.36900 | Pt | 0 | 0 | 0.00000 |
| HETATM | 485 | Pt | 1.39369  | 9.96677  | 26.37044 | Pt | 0 | 0 | 0.00000 |
| HETATM | 486 | Pt | 1.39455  | 18.33953 | 26.37041 | Pt | 0 | 0 | 0.00000 |
| HETATM | 487 | Pt | 2.21104  | 19.75272 | 28.73881 | Pt | 0 | 0 | 0.00000 |
| HETATM | 488 | Pt | 2.21002  | 3.00542  | 28.73737 | Pt | 0 | 0 | 0.00000 |
| HETATM | 489 | Pt | 2.20904  | 11.37998 | 28.73929 | Pt | 0 | 0 | 0.00000 |
| HETATM | 490 | Pt | 9.46021  | 23.93888 | 28.73809 | Pt | 0 | 0 | 0.00000 |
| HETATM | 491 | Pt | 9.46048  | 7.18900  | 28.73691 | Pt | 0 | 0 | 0.00000 |
| HETATM | 492 | Pt | 9.44556  | 15.56724 | 28.71886 | Pt | 0 | 0 | 0.00000 |
| HETATM | 493 | Pt | 16.71317 | 28.12607 | 28.73850 | Pt | 0 | 0 | 0.00000 |
| HETATM | 494 | Pt | 16.71625 | 11.37913 | 28.74127 | Pt | 0 | 0 | 0.00000 |
| HETATM | 495 | Pt | 16.71384 | 19.75319 | 28.73881 | Pt | 0 | 0 | 0.00000 |
| HETATM | 496 | Pt | 2.21037  | 22.52385 | 28.73801 | Pt | 0 | 0 | 0.00000 |
| HETATM | 497 | Pt | 2.20969  | 5.77671  | 28.73793 | Pt | 0 | 0 | 0.00000 |
| HETATM | 498 | Pt | 2.21133  | 14.15219 | 28.73913 | Pt | 0 | 0 | 0.00000 |
| HETATM | 499 | Pt | 9.46129  | 26.71018 | 28.73781 | Pt | 0 | 0 | 0.00000 |
| HETATM | 500 | Pt | 9.45669  | 9.95896  | 28.73948 | Pt | 0 | 0 | 0.00000 |
| HETATM | 501 | Pt | 9.44406  | 18.36731 | 28.66982 | Pt | 0 | 0 | 0.00000 |
| HETATM | 502 | Pt | 16.71330 | 30.89753 | 28.73849 | Pt | 0 | 0 | 0.00000 |
| HETATM | 503 | Pt | 16.71967 | 14.15219 | 28.73931 | Pt | 0 | 0 | 0.00000 |
| HETATM | 504 | Pt | 16.71086 | 22.52349 | 28.73917 | Pt | 0 | 0 | 0.00000 |
| HETATM | 505 | Pt | 2.21493  | 25.32528 | 28.69212 | Pt | 0 | 0 | 0.00000 |
| HETATM | 506 | Pt | 2.21367  | 8.57801  | 28.69264 | Pt | 0 | 0 | 0.00000 |
| HETATM | 507 | Pt | 2.21765  | 16.95214 | 28.69363 | Pt | 0 | 0 | 0.00000 |
| HETATM | 508 | Pt | 9.46640  | 29.51066 | 28.69275 | Pt | 0 | 0 | 0.00000 |
| HETATM | 509 | Pt | 9.45113  | 12.76228 | 28.66577 | Pt | 0 | 0 | 0.00000 |
| HETATM | 510 | Pt | 9.45715  | 21.13545 | 28.67976 | Pt | 0 | 0 | 0.00000 |
| HETATM | 511 | Pt | 16.71830 | 33.69891 | 28.69346 | Pt | 0 | 0 | 0.00000 |
| HETATM | 512 | Pt | 16.72627 | 16.95284 | 28.69101 | Pt | 0 | 0 | 0.00000 |
| HETATM | 513 | Pt | 16.71737 | 25.32456 | 28.69285 | Pt | 0 | 0 | 0.00000 |
| HETATM | 514 | Pt | 4.61093  | 21.13914 | 28.73829 | Pt | 0 | 0 | 0.00000 |
| HETATM | 515 | Pt | 4.60954  | 4.39080  | 28.73737 | Pt | 0 | 0 | 0.00000 |
| HETATM | 516 | Pt | 4.60897  | 12.76443 | 28.73877 | Pt | 0 | 0 | 0.00000 |
| HETATM | 517 | Pt | 11.86081 | 25.32401 | 28.73855 | Pt | 0 | 0 | 0.00000 |
| HETATM | 518 | Pt | 11.85995 | 8.57532  | 28.74138 | Pt | 0 | 0 | 0.00000 |
| HETATM | 519 | Pt | 11.86829 | 16.96602 | 28.71882 | Pt | 0 | 0 | 0.00000 |
| HETATM | 520 | Pt | 19.11351 | 29.51194 | 28.73856 | Pt | 0 | 0 | 0.00000 |
| HETATM | 521 | Pt | 19.11656 | 12.76396 | 28.73681 | Pt | 0 | 0 | 0.00000 |
| HETATM | 522 | Pt | 19.11278 | 21.13937 | 28.73938 | Pt | 0 | 0 | 0.00000 |
| HETATM | 523 | Pt | 4.62990  | 23.94690 | 28.63776 | Pt | 0 | 0 | 0.00000 |
| HETATM | 524 | Pt | 4.62927  | 7.19754  | 28.63771 | Pt | 0 | 0 | 0.00000 |
| HETATM | 525 | Pt | 4.63704  | 15.57485 | 28.64323 | Pt | 0 | 0 | 0.00000 |
| HETATM | 526 | Pt | 11.88239 | 28.13171 | 28.63865 | Pt | 0 | 0 | 0.00000 |
| HETATM | 527 | Pt | 11.87591 | 11.38058 | 28.65219 | Pt | 0 | 0 | 0.00000 |
| HETATM | 528 | Pt | 11.86527 | 19.75360 | 28.66635 | Pt | 0 | 0 | 0.00000 |
| HETATM | 529 | Pt | 19.13461 | 32.31918 | 28.63879 | Pt | 0 | 0 | 0.00000 |
| HETATM | 530 | Pt | 19.13824 | 15.57274 | 28.63741 | Pt | 0 | 0 | 0.00000 |
| HETATM | 531 | Pt | 19.13345 | 23.94604 | 28.63910 | Pt | 0 | 0 | 0.00000 |
| HETATM | 532 | Pt | 4.63039  | 26.70490 | 28.63758 | Pt | 0 | 0 | 0.00000 |
| HETATM | 533 | Pt | 4.62796  | 9.95565  | 28.63841 | Pt | 0 | 0 | 0.00000 |
| HETATM | 534 | Pt | 4.63472  | 18.33303 | 28.64046 | Pt | 0 | 0 | 0.00000 |
| HETATM | 535 | Pt | 11.88248 | 30.88999 | 28.63883 | Pt | 0 | 0 | 0.00000 |
| HETATM | 536 | Pt | 11.88019 | 14.14783 | 28.69454 | Pt | 0 | 0 | 0.00000 |
| HETATM | 537 | Pt | 11.87852 | 22.51526 | 28.64035 | Pt | 0 | 0 | 0.00000 |
| HETATM | 538 | Pt | 19.13527 | 35.07739 | 28.63877 | Pt | 0 | 0 | 0.00000 |
| HETATM | 539 | Pt | 19.13685 | 18.33239 | 28.63844 | Pt | 0 | 0 | 0.00000 |
| HETATM | 540 | Pt | 19.13412 | 26.70455 | 28.63878 | Pt | 0 | 0 | 0.00000 |
| HETATM | 541 | Pt | 7.03112  | 22.54674 | 28.69032 | Pt | 0 | 0 | 0.00000 |
| HETATM | 542 | Pt | 7.03238  | 5.79462  | 28.69209 | Pt | 0 | 0 | 0.00000 |

|        |     |    |          |          |          |    |   |   |         |
|--------|-----|----|----------|----------|----------|----|---|---|---------|
| HETATM | 543 | Pt | 7.03193  | 14.16013 | 28.69934 | Pt | 0 | 0 | 0.00000 |
| HETATM | 544 | Pt | 14.28446 | 26.72904 | 28.69273 | Pt | 0 | 0 | 0.00000 |
| HETATM | 545 | Pt | 14.28421 | 9.98398  | 28.69637 | Pt | 0 | 0 | 0.00000 |
| HETATM | 546 | Pt | 14.29370 | 18.35273 | 28.69942 | Pt | 0 | 0 | 0.00000 |
| HETATM | 547 | Pt | 21.53777 | 30.91671 | 28.69274 | Pt | 0 | 0 | 0.00000 |
| HETATM | 548 | Pt | 21.53817 | 14.16958 | 28.69209 | Pt | 0 | 0 | 0.00000 |
| HETATM | 549 | Pt | 21.53622 | 22.54402 | 28.69308 | Pt | 0 | 0 | 0.00000 |
| HETATM | 550 | Pt | 7.01912  | 25.32633 | 28.63767 | Pt | 0 | 0 | 0.00000 |
| HETATM | 551 | Pt | 7.01719  | 8.57462  | 28.63746 | Pt | 0 | 0 | 0.00000 |
| HETATM | 552 | Pt | 7.03296  | 16.96362 | 28.66636 | Pt | 0 | 0 | 0.00000 |
| HETATM | 553 | Pt | 14.27148 | 29.51146 | 28.63880 | Pt | 0 | 0 | 0.00000 |
| HETATM | 554 | Pt | 14.27885 | 12.76792 | 28.65214 | Pt | 0 | 0 | 0.00000 |
| HETATM | 555 | Pt | 14.26594 | 21.13412 | 28.64324 | Pt | 0 | 0 | 0.00000 |
| HETATM | 556 | Pt | 21.52406 | 33.69831 | 28.63873 | Pt | 0 | 0 | 0.00000 |
| HETATM | 557 | Pt | 21.52479 | 16.95220 | 28.63771 | Pt | 0 | 0 | 0.00000 |
| HETATM | 558 | Pt | 21.52340 | 25.32587 | 28.63908 | Pt | 0 | 0 | 0.00000 |
| HETATM | 559 | Pt | 7.03289  | 28.10692 | 28.69203 | Pt | 0 | 0 | 0.00000 |
| HETATM | 560 | Pt | 7.02804  | 11.35351 | 28.69097 | Pt | 0 | 0 | 0.00000 |
| HETATM | 561 | Pt | 7.04029  | 19.74018 | 28.67981 | Pt | 0 | 0 | 0.00000 |
| HETATM | 562 | Pt | 14.28479 | 32.29391 | 28.69351 | Pt | 0 | 0 | 0.00000 |
| HETATM | 563 | Pt | 14.29464 | 15.55868 | 28.66580 | Pt | 0 | 0 | 0.00000 |
| HETATM | 564 | Pt | 14.28286 | 23.91800 | 28.69361 | Pt | 0 | 0 | 0.00000 |
| HETATM | 565 | Pt | 21.53783 | 36.48012 | 28.69278 | Pt | 0 | 0 | 0.00000 |
| HETATM | 566 | Pt | 21.53708 | 19.73441 | 28.69265 | Pt | 0 | 0 | 0.00000 |
| HETATM | 567 | Pt | 21.53760 | 28.10752 | 28.69282 | Pt | 0 | 0 | 0.00000 |
| HETATM | 568 | O  | 3.01025  | 21.13935 | 29.85868 | O  | 0 | 0 | 0.00000 |
| HETATM | 569 | O  | 3.00993  | 4.39065  | 29.85789 | O  | 0 | 0 | 0.00000 |
| HETATM | 570 | O  | 3.01080  | 12.76562 | 29.85934 | O  | 0 | 0 | 0.00000 |
| HETATM | 571 | O  | 10.26040 | 25.32522 | 29.85843 | O  | 0 | 0 | 0.00000 |
| HETATM | 572 | O  | 10.25684 | 8.57154  | 29.85956 | O  | 0 | 0 | 0.00000 |
| HETATM | 573 | O  | 10.75177 | 16.10245 | 29.87498 | O  | 0 | 0 | 0.00000 |
| HETATM | 574 | O  | 17.51322 | 29.51194 | 29.85857 | O  | 0 | 0 | 0.00000 |
| HETATM | 575 | O  | 17.52105 | 12.76562 | 29.85937 | O  | 0 | 0 | 0.00000 |
| HETATM | 576 | O  | 17.51188 | 21.13784 | 29.85943 | O  | 0 | 0 | 0.00000 |

UNIT ENERGY    kcal  
ENERGY            -73559.062708  
END

XTLGRF 200  
DESCRP FS  
REMARK Pt111\_0.11ML\_9x9x7\_30.0\_vac hcp-displacement  
FIXATOMS        1        162  
CRYSTX        25.12092    25.12092    43.67409    90.00000    90.00000    60.00000  
FORMAT ATOM    (a6,1x,i5,1x,a5,1x,a3,1x,a1,1x,a5,3f10.5,1x,a5,i3,i2,1x,f8.5)  
HETATM        1 Pt            2.20377    19.74305    14.98634    Pt    0 0    0.00000  
HETATM        2 Pt            2.20377    2.99577    14.98634    Pt    0 0    0.00000  
HETATM        3 Pt            2.20377    11.36941    14.98634    Pt    0 0    0.00000  
HETATM        4 Pt            9.45555    23.92987    14.98634    Pt    0 0    0.00000  
HETATM        5 Pt            9.45555    7.18259    14.98634    Pt    0 0    0.00000  
HETATM        6 Pt            9.45555    15.55623    14.98634    Pt    0 0    0.00000  
HETATM        7 Pt            16.70734    28.11669    14.98634    Pt    0 0    0.00000  
HETATM        8 Pt            16.70734    11.36941    14.98634    Pt    0 0    0.00000  
HETATM        9 Pt            16.70734    19.74305    14.98634    Pt    0 0    0.00000  
HETATM        10 Pt           2.20377    22.53426    14.98634    Pt    0 0    0.00000  
HETATM        11 Pt           2.20377    5.78698    14.98634    Pt    0 0    0.00000  
HETATM        12 Pt           2.20377    14.16062    14.98634    Pt    0 0    0.00000  
HETATM        13 Pt           9.45555    26.72108    14.98634    Pt    0 0    0.00000  
HETATM        14 Pt           9.45555    9.97380    14.98634    Pt    0 0    0.00000  
HETATM        15 Pt           9.45555    18.34744    14.98634    Pt    0 0    0.00000  
HETATM        16 Pt           16.70734    30.90790    14.98634    Pt    0 0    0.00000  
HETATM        17 Pt           16.70734    14.16062    14.98634    Pt    0 0    0.00000  
HETATM        18 Pt           16.70734    22.53426    14.98634    Pt    0 0    0.00000  
HETATM        19 Pt           2.20377    25.32547    14.98634    Pt    0 0    0.00000

|        |    |    |          |          |          |    |   |   |         |
|--------|----|----|----------|----------|----------|----|---|---|---------|
| HETATM | 20 | Pt | 2.20377  | 8.57819  | 14.98634 | Pt | 0 | 0 | 0.00000 |
| HETATM | 21 | Pt | 2.20377  | 16.95183 | 14.98634 | Pt | 0 | 0 | 0.00000 |
| HETATM | 22 | Pt | 9.45555  | 29.51229 | 14.98634 | Pt | 0 | 0 | 0.00000 |
| HETATM | 23 | Pt | 9.45555  | 12.76501 | 14.98634 | Pt | 0 | 0 | 0.00000 |
| HETATM | 24 | Pt | 9.45555  | 21.13865 | 14.98634 | Pt | 0 | 0 | 0.00000 |
| HETATM | 25 | Pt | 16.70734 | 33.69911 | 14.98634 | Pt | 0 | 0 | 0.00000 |
| HETATM | 26 | Pt | 16.70734 | 16.95183 | 14.98634 | Pt | 0 | 0 | 0.00000 |
| HETATM | 27 | Pt | 16.70734 | 25.32547 | 14.98634 | Pt | 0 | 0 | 0.00000 |
| HETATM | 28 | Pt | 4.62103  | 21.13866 | 14.98634 | Pt | 0 | 0 | 0.00000 |
| HETATM | 29 | Pt | 4.62103  | 4.39138  | 14.98634 | Pt | 0 | 0 | 0.00000 |
| HETATM | 30 | Pt | 4.62103  | 12.76502 | 14.98634 | Pt | 0 | 0 | 0.00000 |
| HETATM | 31 | Pt | 11.87281 | 25.32548 | 14.98634 | Pt | 0 | 0 | 0.00000 |
| HETATM | 32 | Pt | 11.87281 | 8.57820  | 14.98634 | Pt | 0 | 0 | 0.00000 |
| HETATM | 33 | Pt | 11.87281 | 16.95184 | 14.98634 | Pt | 0 | 0 | 0.00000 |
| HETATM | 34 | Pt | 19.12460 | 29.51230 | 14.98634 | Pt | 0 | 0 | 0.00000 |
| HETATM | 35 | Pt | 19.12460 | 12.76502 | 14.98634 | Pt | 0 | 0 | 0.00000 |
| HETATM | 36 | Pt | 19.12460 | 21.13866 | 14.98634 | Pt | 0 | 0 | 0.00000 |
| HETATM | 37 | Pt | 4.62103  | 23.92987 | 14.98634 | Pt | 0 | 0 | 0.00000 |
| HETATM | 38 | Pt | 4.62103  | 7.18259  | 14.98634 | Pt | 0 | 0 | 0.00000 |
| HETATM | 39 | Pt | 4.62103  | 15.55623 | 14.98634 | Pt | 0 | 0 | 0.00000 |
| HETATM | 40 | Pt | 11.87281 | 28.11669 | 14.98634 | Pt | 0 | 0 | 0.00000 |
| HETATM | 41 | Pt | 11.87281 | 11.36941 | 14.98634 | Pt | 0 | 0 | 0.00000 |
| HETATM | 42 | Pt | 11.87281 | 19.74305 | 14.98634 | Pt | 0 | 0 | 0.00000 |
| HETATM | 43 | Pt | 19.12460 | 32.30351 | 14.98634 | Pt | 0 | 0 | 0.00000 |
| HETATM | 44 | Pt | 19.12460 | 15.55623 | 14.98634 | Pt | 0 | 0 | 0.00000 |
| HETATM | 45 | Pt | 19.12460 | 23.92987 | 14.98634 | Pt | 0 | 0 | 0.00000 |
| HETATM | 46 | Pt | 4.62103  | 26.72108 | 14.98634 | Pt | 0 | 0 | 0.00000 |
| HETATM | 47 | Pt | 4.62103  | 9.97380  | 14.98634 | Pt | 0 | 0 | 0.00000 |
| HETATM | 48 | Pt | 4.62103  | 18.34744 | 14.98634 | Pt | 0 | 0 | 0.00000 |
| HETATM | 49 | Pt | 11.87281 | 30.90790 | 14.98634 | Pt | 0 | 0 | 0.00000 |
| HETATM | 50 | Pt | 11.87281 | 14.16062 | 14.98634 | Pt | 0 | 0 | 0.00000 |
| HETATM | 51 | Pt | 11.87281 | 22.53426 | 14.98634 | Pt | 0 | 0 | 0.00000 |
| HETATM | 52 | Pt | 19.12460 | 35.09472 | 14.98634 | Pt | 0 | 0 | 0.00000 |
| HETATM | 53 | Pt | 19.12460 | 18.34744 | 14.98634 | Pt | 0 | 0 | 0.00000 |
| HETATM | 54 | Pt | 19.12460 | 26.72108 | 14.98634 | Pt | 0 | 0 | 0.00000 |
| HETATM | 55 | Pt | 7.03829  | 22.53426 | 14.98634 | Pt | 0 | 0 | 0.00000 |
| HETATM | 56 | Pt | 7.03829  | 5.78698  | 14.98634 | Pt | 0 | 0 | 0.00000 |
| HETATM | 57 | Pt | 7.03829  | 14.16062 | 14.98634 | Pt | 0 | 0 | 0.00000 |
| HETATM | 58 | Pt | 14.29007 | 26.72108 | 14.98634 | Pt | 0 | 0 | 0.00000 |
| HETATM | 59 | Pt | 14.29007 | 9.97380  | 14.98634 | Pt | 0 | 0 | 0.00000 |
| HETATM | 60 | Pt | 14.29007 | 18.34744 | 14.98634 | Pt | 0 | 0 | 0.00000 |
| HETATM | 61 | Pt | 21.54186 | 30.90790 | 14.98634 | Pt | 0 | 0 | 0.00000 |
| HETATM | 62 | Pt | 21.54186 | 14.16062 | 14.98634 | Pt | 0 | 0 | 0.00000 |
| HETATM | 63 | Pt | 21.54186 | 22.53426 | 14.98634 | Pt | 0 | 0 | 0.00000 |
| HETATM | 64 | Pt | 7.03829  | 25.32547 | 14.98634 | Pt | 0 | 0 | 0.00000 |
| HETATM | 65 | Pt | 7.03829  | 8.57819  | 14.98634 | Pt | 0 | 0 | 0.00000 |
| HETATM | 66 | Pt | 7.03829  | 16.95183 | 14.98634 | Pt | 0 | 0 | 0.00000 |
| HETATM | 67 | Pt | 14.29007 | 29.51229 | 14.98634 | Pt | 0 | 0 | 0.00000 |
| HETATM | 68 | Pt | 14.29007 | 12.76501 | 14.98634 | Pt | 0 | 0 | 0.00000 |
| HETATM | 69 | Pt | 14.29007 | 21.13865 | 14.98634 | Pt | 0 | 0 | 0.00000 |
| HETATM | 70 | Pt | 21.54186 | 33.69911 | 14.98634 | Pt | 0 | 0 | 0.00000 |
| HETATM | 71 | Pt | 21.54186 | 16.95183 | 14.98634 | Pt | 0 | 0 | 0.00000 |
| HETATM | 72 | Pt | 21.54186 | 25.32547 | 14.98634 | Pt | 0 | 0 | 0.00000 |
| HETATM | 73 | Pt | 7.03829  | 28.11669 | 14.98634 | Pt | 0 | 0 | 0.00000 |
| HETATM | 74 | Pt | 7.03829  | 11.36941 | 14.98634 | Pt | 0 | 0 | 0.00000 |
| HETATM | 75 | Pt | 7.03829  | 19.74305 | 14.98634 | Pt | 0 | 0 | 0.00000 |
| HETATM | 76 | Pt | 14.29007 | 32.30351 | 14.98634 | Pt | 0 | 0 | 0.00000 |
| HETATM | 77 | Pt | 14.29007 | 15.55623 | 14.98634 | Pt | 0 | 0 | 0.00000 |
| HETATM | 78 | Pt | 14.29007 | 23.92987 | 14.98634 | Pt | 0 | 0 | 0.00000 |
| HETATM | 79 | Pt | 21.54186 | 36.49033 | 14.98634 | Pt | 0 | 0 | 0.00000 |
| HETATM | 80 | Pt | 21.54186 | 19.74305 | 14.98634 | Pt | 0 | 0 | 0.00000 |
| HETATM | 81 | Pt | 21.54186 | 28.11669 | 14.98634 | Pt | 0 | 0 | 0.00000 |
| HETATM | 82 | Pt | 3.00952  | 21.13866 | 17.26536 | Pt | 0 | 0 | 0.00000 |

|        |     |    |          |          |          |    |   |   |         |
|--------|-----|----|----------|----------|----------|----|---|---|---------|
| HETATM | 83  | Pt | 3.00952  | 4.39138  | 17.26536 | Pt | 0 | 0 | 0.00000 |
| HETATM | 84  | Pt | 3.00952  | 12.76502 | 17.26536 | Pt | 0 | 0 | 0.00000 |
| HETATM | 85  | Pt | 10.26130 | 25.32548 | 17.26536 | Pt | 0 | 0 | 0.00000 |
| HETATM | 86  | Pt | 10.26130 | 8.57820  | 17.26536 | Pt | 0 | 0 | 0.00000 |
| HETATM | 87  | Pt | 10.26130 | 16.95184 | 17.26536 | Pt | 0 | 0 | 0.00000 |
| HETATM | 88  | Pt | 17.51309 | 29.51230 | 17.26536 | Pt | 0 | 0 | 0.00000 |
| HETATM | 89  | Pt | 17.51309 | 12.76502 | 17.26536 | Pt | 0 | 0 | 0.00000 |
| HETATM | 90  | Pt | 17.51309 | 21.13866 | 17.26536 | Pt | 0 | 0 | 0.00000 |
| HETATM | 91  | Pt | 3.00952  | 23.92987 | 17.26536 | Pt | 0 | 0 | 0.00000 |
| HETATM | 92  | Pt | 3.00952  | 7.18259  | 17.26536 | Pt | 0 | 0 | 0.00000 |
| HETATM | 93  | Pt | 3.00952  | 15.55623 | 17.26536 | Pt | 0 | 0 | 0.00000 |
| HETATM | 94  | Pt | 10.26130 | 28.11669 | 17.26536 | Pt | 0 | 0 | 0.00000 |
| HETATM | 95  | Pt | 10.26130 | 11.36941 | 17.26536 | Pt | 0 | 0 | 0.00000 |
| HETATM | 96  | Pt | 10.26130 | 19.74305 | 17.26536 | Pt | 0 | 0 | 0.00000 |
| HETATM | 97  | Pt | 17.51309 | 32.30351 | 17.26536 | Pt | 0 | 0 | 0.00000 |
| HETATM | 98  | Pt | 17.51309 | 15.55623 | 17.26536 | Pt | 0 | 0 | 0.00000 |
| HETATM | 99  | Pt | 17.51309 | 23.92987 | 17.26536 | Pt | 0 | 0 | 0.00000 |
| HETATM | 100 | Pt | 3.00952  | 26.72108 | 17.26536 | Pt | 0 | 0 | 0.00000 |
| HETATM | 101 | Pt | 3.00952  | 9.97380  | 17.26536 | Pt | 0 | 0 | 0.00000 |
| HETATM | 102 | Pt | 3.00952  | 18.34744 | 17.26536 | Pt | 0 | 0 | 0.00000 |
| HETATM | 103 | Pt | 10.26130 | 30.90790 | 17.26536 | Pt | 0 | 0 | 0.00000 |
| HETATM | 104 | Pt | 10.26130 | 14.16062 | 17.26536 | Pt | 0 | 0 | 0.00000 |
| HETATM | 105 | Pt | 10.26130 | 22.53426 | 17.26536 | Pt | 0 | 0 | 0.00000 |
| HETATM | 106 | Pt | 17.51309 | 35.09472 | 17.26536 | Pt | 0 | 0 | 0.00000 |
| HETATM | 107 | Pt | 17.51309 | 18.34744 | 17.26536 | Pt | 0 | 0 | 0.00000 |
| HETATM | 108 | Pt | 17.51309 | 26.72108 | 17.26536 | Pt | 0 | 0 | 0.00000 |
| HETATM | 109 | Pt | 5.42678  | 22.53426 | 17.26536 | Pt | 0 | 0 | 0.00000 |
| HETATM | 110 | Pt | 5.42678  | 5.78698  | 17.26536 | Pt | 0 | 0 | 0.00000 |
| HETATM | 111 | Pt | 5.42678  | 14.16062 | 17.26536 | Pt | 0 | 0 | 0.00000 |
| HETATM | 112 | Pt | 12.67856 | 26.72108 | 17.26536 | Pt | 0 | 0 | 0.00000 |
| HETATM | 113 | Pt | 12.67856 | 9.97380  | 17.26536 | Pt | 0 | 0 | 0.00000 |
| HETATM | 114 | Pt | 12.67856 | 18.34744 | 17.26536 | Pt | 0 | 0 | 0.00000 |
| HETATM | 115 | Pt | 19.93035 | 30.90790 | 17.26536 | Pt | 0 | 0 | 0.00000 |
| HETATM | 116 | Pt | 19.93035 | 14.16062 | 17.26536 | Pt | 0 | 0 | 0.00000 |
| HETATM | 117 | Pt | 19.93035 | 22.53426 | 17.26536 | Pt | 0 | 0 | 0.00000 |
| HETATM | 118 | Pt | 5.42678  | 25.32547 | 17.26536 | Pt | 0 | 0 | 0.00000 |
| HETATM | 119 | Pt | 5.42678  | 8.57819  | 17.26536 | Pt | 0 | 0 | 0.00000 |
| HETATM | 120 | Pt | 5.42678  | 16.95183 | 17.26536 | Pt | 0 | 0 | 0.00000 |
| HETATM | 121 | Pt | 12.67856 | 29.51229 | 17.26536 | Pt | 0 | 0 | 0.00000 |
| HETATM | 122 | Pt | 12.67856 | 12.76501 | 17.26536 | Pt | 0 | 0 | 0.00000 |
| HETATM | 123 | Pt | 12.67856 | 21.13865 | 17.26536 | Pt | 0 | 0 | 0.00000 |
| HETATM | 124 | Pt | 19.93035 | 33.69911 | 17.26536 | Pt | 0 | 0 | 0.00000 |
| HETATM | 125 | Pt | 19.93035 | 16.95183 | 17.26536 | Pt | 0 | 0 | 0.00000 |
| HETATM | 126 | Pt | 19.93035 | 25.32547 | 17.26536 | Pt | 0 | 0 | 0.00000 |
| HETATM | 127 | Pt | 5.42678  | 28.11669 | 17.26536 | Pt | 0 | 0 | 0.00000 |
| HETATM | 128 | Pt | 5.42678  | 11.36941 | 17.26536 | Pt | 0 | 0 | 0.00000 |
| HETATM | 129 | Pt | 5.42678  | 19.74305 | 17.26536 | Pt | 0 | 0 | 0.00000 |
| HETATM | 130 | Pt | 12.67856 | 32.30351 | 17.26536 | Pt | 0 | 0 | 0.00000 |
| HETATM | 131 | Pt | 12.67856 | 15.55623 | 17.26536 | Pt | 0 | 0 | 0.00000 |
| HETATM | 132 | Pt | 12.67856 | 23.92987 | 17.26536 | Pt | 0 | 0 | 0.00000 |
| HETATM | 133 | Pt | 19.93035 | 36.49033 | 17.26536 | Pt | 0 | 0 | 0.00000 |
| HETATM | 134 | Pt | 19.93035 | 19.74305 | 17.26536 | Pt | 0 | 0 | 0.00000 |
| HETATM | 135 | Pt | 19.93035 | 28.11669 | 17.26536 | Pt | 0 | 0 | 0.00000 |
| HETATM | 136 | Pt | 7.84404  | 23.92987 | 17.26536 | Pt | 0 | 0 | 0.00000 |
| HETATM | 137 | Pt | 7.84404  | 7.18259  | 17.26536 | Pt | 0 | 0 | 0.00000 |
| HETATM | 138 | Pt | 7.84404  | 15.55623 | 17.26536 | Pt | 0 | 0 | 0.00000 |
| HETATM | 139 | Pt | 15.09582 | 28.11669 | 17.26536 | Pt | 0 | 0 | 0.00000 |
| HETATM | 140 | Pt | 15.09582 | 11.36941 | 17.26536 | Pt | 0 | 0 | 0.00000 |
| HETATM | 141 | Pt | 15.09582 | 19.74305 | 17.26536 | Pt | 0 | 0 | 0.00000 |
| HETATM | 142 | Pt | 0.59226  | 19.74305 | 17.26536 | Pt | 0 | 0 | 0.00000 |
| HETATM | 143 | Pt | 0.59226  | 2.99577  | 17.26536 | Pt | 0 | 0 | 0.00000 |
| HETATM | 144 | Pt | 0.59226  | 11.36941 | 17.26536 | Pt | 0 | 0 | 0.00000 |
| HETATM | 145 | Pt | 7.84404  | 26.72108 | 17.26536 | Pt | 0 | 0 | 0.00000 |

|        |     |    |          |          |          |    |   |   |         |
|--------|-----|----|----------|----------|----------|----|---|---|---------|
| HETATM | 146 | Pt | 7.84404  | 9.97380  | 17.26536 | Pt | 0 | 0 | 0.00000 |
| HETATM | 147 | Pt | 7.84404  | 18.34744 | 17.26536 | Pt | 0 | 0 | 0.00000 |
| HETATM | 148 | Pt | 15.09582 | 30.90790 | 17.26536 | Pt | 0 | 0 | 0.00000 |
| HETATM | 149 | Pt | 15.09582 | 14.16062 | 17.26536 | Pt | 0 | 0 | 0.00000 |
| HETATM | 150 | Pt | 15.09582 | 22.53426 | 17.26536 | Pt | 0 | 0 | 0.00000 |
| HETATM | 151 | Pt | 0.59226  | 22.53426 | 17.26536 | Pt | 0 | 0 | 0.00000 |
| HETATM | 152 | Pt | 0.59226  | 5.78698  | 17.26536 | Pt | 0 | 0 | 0.00000 |
| HETATM | 153 | Pt | 0.59226  | 14.16062 | 17.26536 | Pt | 0 | 0 | 0.00000 |
| HETATM | 154 | Pt | 7.84404  | 29.51229 | 17.26536 | Pt | 0 | 0 | 0.00000 |
| HETATM | 155 | Pt | 7.84404  | 12.76501 | 17.26536 | Pt | 0 | 0 | 0.00000 |
| HETATM | 156 | Pt | 7.84404  | 21.13865 | 17.26536 | Pt | 0 | 0 | 0.00000 |
| HETATM | 157 | Pt | 15.09582 | 33.69911 | 17.26536 | Pt | 0 | 0 | 0.00000 |
| HETATM | 158 | Pt | 15.09582 | 16.95183 | 17.26536 | Pt | 0 | 0 | 0.00000 |
| HETATM | 159 | Pt | 15.09582 | 25.32547 | 17.26536 | Pt | 0 | 0 | 0.00000 |
| HETATM | 160 | Pt | 0.59226  | 25.32547 | 17.26536 | Pt | 0 | 0 | 0.00000 |
| HETATM | 161 | Pt | 0.59226  | 8.57819  | 17.26536 | Pt | 0 | 0 | 0.00000 |
| HETATM | 162 | Pt | 0.59226  | 16.95183 | 17.26536 | Pt | 0 | 0 | 0.00000 |
| HETATM | 163 | Pt | 3.81486  | 22.53389 | 19.54433 | Pt | 0 | 0 | 0.00000 |
| HETATM | 164 | Pt | 3.81500  | 5.78682  | 19.54401 | Pt | 0 | 0 | 0.00000 |
| HETATM | 165 | Pt | 3.81520  | 14.16052 | 19.54536 | Pt | 0 | 0 | 0.00000 |
| HETATM | 166 | Pt | 11.06727 | 26.72077 | 19.54468 | Pt | 0 | 0 | 0.00000 |
| HETATM | 167 | Pt | 11.06716 | 9.97355  | 19.54506 | Pt | 0 | 0 | 0.00000 |
| HETATM | 168 | Pt | 11.06724 | 18.34762 | 19.54258 | Pt | 0 | 0 | 0.00000 |
| HETATM | 169 | Pt | 18.31866 | 30.90763 | 19.54454 | Pt | 0 | 0 | 0.00000 |
| HETATM | 170 | Pt | 18.31893 | 14.16017 | 19.54424 | Pt | 0 | 0 | 0.00000 |
| HETATM | 171 | Pt | 18.31851 | 22.53413 | 19.54487 | Pt | 0 | 0 | 0.00000 |
| HETATM | 172 | Pt | 3.81516  | 25.32551 | 19.54284 | Pt | 0 | 0 | 0.00000 |
| HETATM | 173 | Pt | 3.81517  | 8.57844  | 19.54343 | Pt | 0 | 0 | 0.00000 |
| HETATM | 174 | Pt | 3.81549  | 16.95159 | 19.54415 | Pt | 0 | 0 | 0.00000 |
| HETATM | 175 | Pt | 11.06750 | 29.51243 | 19.54358 | Pt | 0 | 0 | 0.00000 |
| HETATM | 176 | Pt | 11.06714 | 12.76453 | 19.54319 | Pt | 0 | 0 | 0.00000 |
| HETATM | 177 | Pt | 11.06733 | 21.13882 | 19.54325 | Pt | 0 | 0 | 0.00000 |
| HETATM | 178 | Pt | 18.31867 | 33.69903 | 19.54366 | Pt | 0 | 0 | 0.00000 |
| HETATM | 179 | Pt | 18.31921 | 16.95199 | 19.54318 | Pt | 0 | 0 | 0.00000 |
| HETATM | 180 | Pt | 18.31888 | 25.32550 | 19.54351 | Pt | 0 | 0 | 0.00000 |
| HETATM | 181 | Pt | 3.81511  | 2.99605  | 19.54385 | Pt | 0 | 0 | 0.00000 |
| HETATM | 182 | Pt | 3.81503  | 11.36996 | 19.54507 | Pt | 0 | 0 | 0.00000 |
| HETATM | 183 | Pt | 3.81515  | 19.74287 | 19.54489 | Pt | 0 | 0 | 0.00000 |
| HETATM | 184 | Pt | 11.06728 | 7.18311  | 19.54507 | Pt | 0 | 0 | 0.00000 |
| HETATM | 185 | Pt | 11.06713 | 15.55610 | 19.54268 | Pt | 0 | 0 | 0.00000 |
| HETATM | 186 | Pt | 11.06727 | 23.92989 | 19.54489 | Pt | 0 | 0 | 0.00000 |
| HETATM | 187 | Pt | 18.31828 | 11.36947 | 19.54507 | Pt | 0 | 0 | 0.00000 |
| HETATM | 188 | Pt | 18.31848 | 19.74353 | 19.54507 | Pt | 0 | 0 | 0.00000 |
| HETATM | 189 | Pt | 18.31871 | 28.11691 | 19.54450 | Pt | 0 | 0 | 0.00000 |
| HETATM | 190 | Pt | 6.23225  | 23.93036 | 19.54267 | Pt | 0 | 0 | 0.00000 |
| HETATM | 191 | Pt | 6.23235  | 7.18242  | 19.54283 | Pt | 0 | 0 | 0.00000 |
| HETATM | 192 | Pt | 6.23225  | 15.55601 | 19.54374 | Pt | 0 | 0 | 0.00000 |
| HETATM | 193 | Pt | 13.48447 | 28.11677 | 19.54348 | Pt | 0 | 0 | 0.00000 |
| HETATM | 194 | Pt | 13.48431 | 11.36942 | 19.54435 | Pt | 0 | 0 | 0.00000 |
| HETATM | 195 | Pt | 13.48465 | 19.74318 | 19.54374 | Pt | 0 | 0 | 0.00000 |
| HETATM | 196 | Pt | 20.73595 | 32.30341 | 19.54348 | Pt | 0 | 0 | 0.00000 |
| HETATM | 197 | Pt | 20.73634 | 15.55630 | 19.54283 | Pt | 0 | 0 | 0.00000 |
| HETATM | 198 | Pt | 20.73596 | 23.93012 | 19.54365 | Pt | 0 | 0 | 0.00000 |
| HETATM | 199 | Pt | 6.23255  | 26.72119 | 19.54284 | Pt | 0 | 0 | 0.00000 |
| HETATM | 200 | Pt | 6.23221  | 9.97356  | 19.54318 | Pt | 0 | 0 | 0.00000 |
| HETATM | 201 | Pt | 6.23225  | 18.34729 | 19.54325 | Pt | 0 | 0 | 0.00000 |
| HETATM | 202 | Pt | 13.48447 | 30.90801 | 19.54366 | Pt | 0 | 0 | 0.00000 |
| HETATM | 203 | Pt | 13.48469 | 14.16031 | 19.54318 | Pt | 0 | 0 | 0.00000 |
| HETATM | 204 | Pt | 13.48441 | 22.53395 | 19.54415 | Pt | 0 | 0 | 0.00000 |
| HETATM | 205 | Pt | 20.73576 | 35.09440 | 19.54358 | Pt | 0 | 0 | 0.00000 |
| HETATM | 206 | Pt | 20.73594 | 18.34766 | 19.54342 | Pt | 0 | 0 | 0.00000 |
| HETATM | 207 | Pt | 20.73606 | 26.72106 | 19.54351 | Pt | 0 | 0 | 0.00000 |
| HETATM | 208 | Pt | 6.23234  | 4.39134  | 19.54393 | Pt | 0 | 0 | 0.00000 |

|        |     |    |          |          |          |    |   |   |         |
|--------|-----|----|----------|----------|----------|----|---|---|---------|
| HETATM | 209 | Pt | 6.23182  | 12.76472 | 19.54461 | Pt | 0 | 0 | 0.00000 |
| HETATM | 210 | Pt | 6.23174  | 21.13912 | 19.54359 | Pt | 0 | 0 | 0.00000 |
| HETATM | 211 | Pt | 13.48413 | 8.57844  | 19.54532 | Pt | 0 | 0 | 0.00000 |
| HETATM | 212 | Pt | 13.48508 | 16.95194 | 19.54321 | Pt | 0 | 0 | 0.00000 |
| HETATM | 213 | Pt | 13.48419 | 25.32534 | 19.54461 | Pt | 0 | 0 | 0.00000 |
| HETATM | 214 | Pt | 20.73562 | 12.76476 | 19.54438 | Pt | 0 | 0 | 0.00000 |
| HETATM | 215 | Pt | 20.73556 | 21.13895 | 19.54477 | Pt | 0 | 0 | 0.00000 |
| HETATM | 216 | Pt | 20.73580 | 29.51224 | 19.54446 | Pt | 0 | 0 | 0.00000 |
| HETATM | 217 | Pt | 8.65032  | 25.32565 | 19.54433 | Pt | 0 | 0 | 0.00000 |
| HETATM | 218 | Pt | 8.65014  | 8.57789  | 19.54424 | Pt | 0 | 0 | 0.00000 |
| HETATM | 219 | Pt | 8.64955  | 16.95176 | 19.54258 | Pt | 0 | 0 | 0.00000 |
| HETATM | 220 | Pt | 15.90190 | 29.51232 | 19.54454 | Pt | 0 | 0 | 0.00000 |
| HETATM | 221 | Pt | 15.90174 | 12.76480 | 19.54505 | Pt | 0 | 0 | 0.00000 |
| HETATM | 222 | Pt | 15.90170 | 21.13866 | 19.54536 | Pt | 0 | 0 | 0.00000 |
| HETATM | 223 | Pt | 1.39818  | 21.13831 | 19.54467 | Pt | 0 | 0 | 0.00000 |
| HETATM | 224 | Pt | 1.39829  | 4.39153  | 19.54401 | Pt | 0 | 0 | 0.00000 |
| HETATM | 225 | Pt | 1.39829  | 12.76523 | 19.54487 | Pt | 0 | 0 | 0.00000 |
| HETATM | 226 | Pt | 8.65029  | 28.11649 | 19.54431 | Pt | 0 | 0 | 0.00000 |
| HETATM | 227 | Pt | 8.64962  | 11.36845 | 19.54390 | Pt | 0 | 0 | 0.00000 |
| HETATM | 228 | Pt | 8.64945  | 19.74365 | 19.54252 | Pt | 0 | 0 | 0.00000 |
| HETATM | 229 | Pt | 15.90170 | 32.30330 | 19.54468 | Pt | 0 | 0 | 0.00000 |
| HETATM | 230 | Pt | 15.90250 | 15.55590 | 19.54390 | Pt | 0 | 0 | 0.00000 |
| HETATM | 231 | Pt | 15.90171 | 23.92956 | 19.54467 | Pt | 0 | 0 | 0.00000 |
| HETATM | 232 | Pt | 1.39793  | 23.92934 | 19.54431 | Pt | 0 | 0 | 0.00000 |
| HETATM | 233 | Pt | 1.39797  | 7.18267  | 19.54444 | Pt | 0 | 0 | 0.00000 |
| HETATM | 234 | Pt | 1.39821  | 15.55596 | 19.54467 | Pt | 0 | 0 | 0.00000 |
| HETATM | 235 | Pt | 8.65026  | 5.78727  | 19.54438 | Pt | 0 | 0 | 0.00000 |
| HETATM | 236 | Pt | 8.64932  | 14.16001 | 19.54321 | Pt | 0 | 0 | 0.00000 |
| HETATM | 237 | Pt | 8.64979  | 22.53518 | 19.54359 | Pt | 0 | 0 | 0.00000 |
| HETATM | 238 | Pt | 15.90146 | 9.97409  | 19.54531 | Pt | 0 | 0 | 0.00000 |
| HETATM | 239 | Pt | 15.90218 | 18.34791 | 19.54461 | Pt | 0 | 0 | 0.00000 |
| HETATM | 240 | Pt | 15.90178 | 26.72131 | 19.54445 | Pt | 0 | 0 | 0.00000 |
| HETATM | 241 | Pt | 1.39814  | 1.60031  | 19.54393 | Pt | 0 | 0 | 0.00000 |
| HETATM | 242 | Pt | 1.39802  | 9.97442  | 19.54476 | Pt | 0 | 0 | 0.00000 |
| HETATM | 243 | Pt | 1.39819  | 18.34748 | 19.54460 | Pt | 0 | 0 | 0.00000 |
| HETATM | 244 | Pt | 2.20437  | 19.74317 | 21.82545 | Pt | 0 | 0 | 0.00000 |
| HETATM | 245 | Pt | 2.20429  | 2.99649  | 21.82374 | Pt | 0 | 0 | 0.00000 |
| HETATM | 246 | Pt | 2.20429  | 11.37091 | 21.82585 | Pt | 0 | 0 | 0.00000 |
| HETATM | 247 | Pt | 9.45642  | 23.93066 | 21.82477 | Pt | 0 | 0 | 0.00000 |
| HETATM | 248 | Pt | 9.45642  | 7.18355  | 21.82529 | Pt | 0 | 0 | 0.00000 |
| HETATM | 249 | Pt | 9.45495  | 15.55569 | 21.81947 | Pt | 0 | 0 | 0.00000 |
| HETATM | 250 | Pt | 16.70782 | 28.11743 | 21.82496 | Pt | 0 | 0 | 0.00000 |
| HETATM | 251 | Pt | 16.70682 | 11.37016 | 21.82699 | Pt | 0 | 0 | 0.00000 |
| HETATM | 252 | Pt | 16.70696 | 19.74402 | 21.82685 | Pt | 0 | 0 | 0.00000 |
| HETATM | 253 | Pt | 2.20404  | 22.53301 | 21.82489 | Pt | 0 | 0 | 0.00000 |
| HETATM | 254 | Pt | 2.20407  | 5.78645  | 21.82418 | Pt | 0 | 0 | 0.00000 |
| HETATM | 255 | Pt | 2.20436  | 14.16026 | 21.82589 | Pt | 0 | 0 | 0.00000 |
| HETATM | 256 | Pt | 9.45650  | 26.72021 | 21.82489 | Pt | 0 | 0 | 0.00000 |
| HETATM | 257 | Pt | 9.45613  | 9.97243  | 21.82451 | Pt | 0 | 0 | 0.00000 |
| HETATM | 258 | Pt | 9.45514  | 18.34815 | 21.81854 | Pt | 0 | 0 | 0.00000 |
| HETATM | 259 | Pt | 16.70778 | 30.90712 | 21.82510 | Pt | 0 | 0 | 0.00000 |
| HETATM | 260 | Pt | 16.70823 | 14.15944 | 21.82451 | Pt | 0 | 0 | 0.00000 |
| HETATM | 261 | Pt | 16.70735 | 22.53357 | 21.82589 | Pt | 0 | 0 | 0.00000 |
| HETATM | 262 | Pt | 2.20488  | 25.32521 | 21.82105 | Pt | 0 | 0 | 0.00000 |
| HETATM | 263 | Pt | 2.20478  | 8.57879  | 21.82213 | Pt | 0 | 0 | 0.00000 |
| HETATM | 264 | Pt | 2.20517  | 16.95164 | 21.82255 | Pt | 0 | 0 | 0.00000 |
| HETATM | 265 | Pt | 9.45731  | 29.51237 | 21.82183 | Pt | 0 | 0 | 0.00000 |
| HETATM | 266 | Pt | 9.45600  | 12.76349 | 21.82004 | Pt | 0 | 0 | 0.00000 |
| HETATM | 267 | Pt | 9.45612  | 21.14002 | 21.81952 | Pt | 0 | 0 | 0.00000 |
| HETATM | 268 | Pt | 16.70819 | 33.69911 | 21.82276 | Pt | 0 | 0 | 0.00000 |
| HETATM | 269 | Pt | 16.70885 | 16.95195 | 21.82165 | Pt | 0 | 0 | 0.00000 |
| HETATM | 270 | Pt | 16.70849 | 25.32548 | 21.82210 | Pt | 0 | 0 | 0.00000 |
| HETATM | 271 | Pt | 4.61990  | 21.13829 | 21.82477 | Pt | 0 | 0 | 0.00000 |

|        |     |    |          |          |          |    |   |   |         |
|--------|-----|----|----------|----------|----------|----|---|---|---------|
| HETATM | 272 | Pt | 4.62013  | 4.39128  | 21.82374 | Pt | 0 | 0 | 0.00000 |
| HETATM | 273 | Pt | 4.62037  | 12.76582 | 21.82685 | Pt | 0 | 0 | 0.00000 |
| HETATM | 274 | Pt | 11.87240 | 25.32500 | 21.82545 | Pt | 0 | 0 | 0.00000 |
| HETATM | 275 | Pt | 11.87241 | 8.57901  | 21.82699 | Pt | 0 | 0 | 0.00000 |
| HETATM | 276 | Pt | 11.87358 | 16.95208 | 21.81947 | Pt | 0 | 0 | 0.00000 |
| HETATM | 277 | Pt | 19.12371 | 29.51224 | 21.82496 | Pt | 0 | 0 | 0.00000 |
| HETATM | 278 | Pt | 19.12333 | 12.76473 | 21.82529 | Pt | 0 | 0 | 0.00000 |
| HETATM | 279 | Pt | 19.12303 | 21.13895 | 21.82585 | Pt | 0 | 0 | 0.00000 |
| HETATM | 280 | Pt | 4.62055  | 23.92983 | 21.82052 | Pt | 0 | 0 | 0.00000 |
| HETATM | 281 | Pt | 4.62059  | 7.18229  | 21.82081 | Pt | 0 | 0 | 0.00000 |
| HETATM | 282 | Pt | 4.62147  | 15.55610 | 21.82405 | Pt | 0 | 0 | 0.00000 |
| HETATM | 283 | Pt | 11.87315 | 28.11647 | 21.82190 | Pt | 0 | 0 | 0.00000 |
| HETATM | 284 | Pt | 11.87301 | 11.36939 | 21.82341 | Pt | 0 | 0 | 0.00000 |
| HETATM | 285 | Pt | 11.87306 | 19.74274 | 21.82119 | Pt | 0 | 0 | 0.00000 |
| HETATM | 286 | Pt | 19.12430 | 32.30317 | 21.82185 | Pt | 0 | 0 | 0.00000 |
| HETATM | 287 | Pt | 19.12535 | 15.55599 | 21.82027 | Pt | 0 | 0 | 0.00000 |
| HETATM | 288 | Pt | 19.12424 | 23.92985 | 21.82211 | Pt | 0 | 0 | 0.00000 |
| HETATM | 289 | Pt | 4.62086  | 26.72137 | 21.82040 | Pt | 0 | 0 | 0.00000 |
| HETATM | 290 | Pt | 4.62091  | 9.97452  | 21.82198 | Pt | 0 | 0 | 0.00000 |
| HETATM | 291 | Pt | 4.62151  | 18.34682 | 21.82321 | Pt | 0 | 0 | 0.00000 |
| HETATM | 292 | Pt | 11.87321 | 30.90852 | 21.82227 | Pt | 0 | 0 | 0.00000 |
| HETATM | 293 | Pt | 11.87301 | 14.16027 | 21.81996 | Pt | 0 | 0 | 0.00000 |
| HETATM | 294 | Pt | 11.87311 | 22.53353 | 21.82321 | Pt | 0 | 0 | 0.00000 |
| HETATM | 295 | Pt | 19.12386 | 35.09468 | 21.82227 | Pt | 0 | 0 | 0.00000 |
| HETATM | 296 | Pt | 19.12403 | 18.34790 | 21.82198 | Pt | 0 | 0 | 0.00000 |
| HETATM | 297 | Pt | 19.12445 | 26.72132 | 21.82180 | Pt | 0 | 0 | 0.00000 |
| HETATM | 298 | Pt | 7.03717  | 22.53620 | 21.82018 | Pt | 0 | 0 | 0.00000 |
| HETATM | 299 | Pt | 7.03780  | 5.78771  | 21.82102 | Pt | 0 | 0 | 0.00000 |
| HETATM | 300 | Pt | 7.03711  | 14.16089 | 21.82213 | Pt | 0 | 0 | 0.00000 |
| HETATM | 301 | Pt | 14.28964 | 26.72203 | 21.82201 | Pt | 0 | 0 | 0.00000 |
| HETATM | 302 | Pt | 14.28922 | 9.97527  | 21.82453 | Pt | 0 | 0 | 0.00000 |
| HETATM | 303 | Pt | 14.29043 | 18.34860 | 21.82213 | Pt | 0 | 0 | 0.00000 |
| HETATM | 304 | Pt | 21.54125 | 30.90874 | 21.82201 | Pt | 0 | 0 | 0.00000 |
| HETATM | 305 | Pt | 21.54147 | 14.16141 | 21.82102 | Pt | 0 | 0 | 0.00000 |
| HETATM | 306 | Pt | 21.54096 | 22.53581 | 21.82253 | Pt | 0 | 0 | 0.00000 |
| HETATM | 307 | Pt | 7.03855  | 25.32587 | 21.82052 | Pt | 0 | 0 | 0.00000 |
| HETATM | 308 | Pt | 7.03811  | 8.57742  | 21.82027 | Pt | 0 | 0 | 0.00000 |
| HETATM | 309 | Pt | 7.03843  | 16.95146 | 21.82119 | Pt | 0 | 0 | 0.00000 |
| HETATM | 310 | Pt | 14.29051 | 29.51238 | 21.82185 | Pt | 0 | 0 | 0.00000 |
| HETATM | 311 | Pt | 14.28999 | 12.76483 | 21.82340 | Pt | 0 | 0 | 0.00000 |
| HETATM | 312 | Pt | 14.28996 | 21.13820 | 21.82405 | Pt | 0 | 0 | 0.00000 |
| HETATM | 313 | Pt | 21.54188 | 33.69871 | 21.82190 | Pt | 0 | 0 | 0.00000 |
| HETATM | 314 | Pt | 21.54233 | 16.95206 | 21.82080 | Pt | 0 | 0 | 0.00000 |
| HETATM | 315 | Pt | 21.54205 | 25.32577 | 21.82211 | Pt | 0 | 0 | 0.00000 |
| HETATM | 316 | Pt | 7.03795  | 28.11558 | 21.82105 | Pt | 0 | 0 | 0.00000 |
| HETATM | 317 | Pt | 7.03742  | 11.36815 | 21.82166 | Pt | 0 | 0 | 0.00000 |
| HETATM | 318 | Pt | 7.03682  | 19.74323 | 21.81952 | Pt | 0 | 0 | 0.00000 |
| HETATM | 319 | Pt | 14.28965 | 32.30276 | 21.82276 | Pt | 0 | 0 | 0.00000 |
| HETATM | 320 | Pt | 14.29117 | 15.55508 | 21.82004 | Pt | 0 | 0 | 0.00000 |
| HETATM | 321 | Pt | 14.28954 | 23.92855 | 21.82255 | Pt | 0 | 0 | 0.00000 |
| HETATM | 322 | Pt | 21.54091 | 36.48884 | 21.82183 | Pt | 0 | 0 | 0.00000 |
| HETATM | 323 | Pt | 21.54083 | 19.74247 | 21.82213 | Pt | 0 | 0 | 0.00000 |
| HETATM | 324 | Pt | 21.54127 | 28.11569 | 21.82210 | Pt | 0 | 0 | 0.00000 |
| HETATM | 325 | Pt | 3.00999  | 21.13781 | 24.11214 | Pt | 0 | 0 | 0.00000 |
| HETATM | 326 | Pt | 3.00961  | 4.39122  | 24.11026 | Pt | 0 | 0 | 0.00000 |
| HETATM | 327 | Pt | 3.01059  | 12.76656 | 24.11388 | Pt | 0 | 0 | 0.00000 |
| HETATM | 328 | Pt | 10.26179 | 25.32464 | 24.11214 | Pt | 0 | 0 | 0.00000 |
| HETATM | 329 | Pt | 10.26162 | 8.57903  | 24.11370 | Pt | 0 | 0 | 0.00000 |
| HETATM | 330 | Pt | 10.26110 | 16.95218 | 24.09339 | Pt | 0 | 0 | 0.00000 |
| HETATM | 331 | Pt | 17.51314 | 29.51221 | 24.11196 | Pt | 0 | 0 | 0.00000 |
| HETATM | 332 | Pt | 17.51220 | 12.76516 | 24.11370 | Pt | 0 | 0 | 0.00000 |
| HETATM | 333 | Pt | 17.51121 | 21.13850 | 24.11388 | Pt | 0 | 0 | 0.00000 |
| HETATM | 334 | Pt | 3.01091  | 23.92749 | 24.10132 | Pt | 0 | 0 | 0.00000 |



|        |     |    |          |          |          |    |   |   |         |
|--------|-----|----|----------|----------|----------|----|---|---|---------|
| HETATM | 335 | Pt | 3.01053  | 7.18064  | 24.10141 | Pt | 0 | 0 | 0.00000 |
| HETATM | 336 | Pt | 3.01174  | 15.55472 | 24.10415 | Pt | 0 | 0 | 0.00000 |
| HETATM | 337 | Pt | 10.26322 | 28.11434 | 24.10223 | Pt | 0 | 0 | 0.00000 |
| HETATM | 338 | Pt | 10.26304 | 11.36670 | 24.10191 | Pt | 0 | 0 | 0.00000 |
| HETATM | 339 | Pt | 10.26032 | 19.74371 | 24.09569 | Pt | 0 | 0 | 0.00000 |
| HETATM | 340 | Pt | 17.51428 | 32.30144 | 24.10269 | Pt | 0 | 0 | 0.00000 |
| HETATM | 341 | Pt | 17.51694 | 15.55432 | 24.09872 | Pt | 0 | 0 | 0.00000 |
| HETATM | 342 | Pt | 17.51396 | 23.92781 | 24.10290 | Pt | 0 | 0 | 0.00000 |
| HETATM | 343 | Pt | 3.01108  | 26.72294 | 24.10061 | Pt | 0 | 0 | 0.00000 |
| HETATM | 344 | Pt | 3.01119  | 9.97685  | 24.10282 | Pt | 0 | 0 | 0.00000 |
| HETATM | 345 | Pt | 3.01190  | 18.34851 | 24.10359 | Pt | 0 | 0 | 0.00000 |
| HETATM | 346 | Pt | 10.26324 | 30.91015 | 24.10247 | Pt | 0 | 0 | 0.00000 |
| HETATM | 347 | Pt | 10.26087 | 14.16036 | 24.09535 | Pt | 0 | 0 | 0.00000 |
| HETATM | 348 | Pt | 10.26346 | 22.53545 | 24.10294 | Pt | 0 | 0 | 0.00000 |
| HETATM | 349 | Pt | 17.51338 | 35.09682 | 24.10381 | Pt | 0 | 0 | 0.00000 |
| HETATM | 350 | Pt | 17.51290 | 18.34921 | 24.10330 | Pt | 0 | 0 | 0.00000 |
| HETATM | 351 | Pt | 17.51443 | 26.72305 | 24.10239 | Pt | 0 | 0 | 0.00000 |
| HETATM | 352 | Pt | 5.42389  | 22.53496 | 24.10011 | Pt | 0 | 0 | 0.00000 |
| HETATM | 353 | Pt | 5.42407  | 5.78650  | 24.10066 | Pt | 0 | 0 | 0.00000 |
| HETATM | 354 | Pt | 5.42600  | 14.16301 | 24.10761 | Pt | 0 | 0 | 0.00000 |
| HETATM | 355 | Pt | 12.67644 | 26.72074 | 24.10254 | Pt | 0 | 0 | 0.00000 |
| HETATM | 356 | Pt | 12.67630 | 9.97604  | 24.10789 | Pt | 0 | 0 | 0.00000 |
| HETATM | 357 | Pt | 12.67813 | 18.34663 | 24.10077 | Pt | 0 | 0 | 0.00000 |
| HETATM | 358 | Pt | 19.92794 | 30.90797 | 24.10234 | Pt | 0 | 0 | 0.00000 |
| HETATM | 359 | Pt | 19.92883 | 14.16051 | 24.10112 | Pt | 0 | 0 | 0.00000 |
| HETATM | 360 | Pt | 19.92711 | 22.53472 | 24.10318 | Pt | 0 | 0 | 0.00000 |
| HETATM | 361 | Pt | 5.42657  | 25.32583 | 24.09551 | Pt | 0 | 0 | 0.00000 |
| HETATM | 362 | Pt | 5.42600  | 8.57751  | 24.09601 | Pt | 0 | 0 | 0.00000 |
| HETATM | 363 | Pt | 5.42944  | 16.95091 | 24.10234 | Pt | 0 | 0 | 0.00000 |
| HETATM | 364 | Pt | 12.67893 | 29.51243 | 24.09776 | Pt | 0 | 0 | 0.00000 |
| HETATM | 365 | Pt | 12.67795 | 12.76607 | 24.10142 | Pt | 0 | 0 | 0.00000 |
| HETATM | 366 | Pt | 12.67803 | 21.13588 | 24.10234 | Pt | 0 | 0 | 0.00000 |
| HETATM | 367 | Pt | 19.93004 | 33.69886 | 24.09776 | Pt | 0 | 0 | 0.00000 |
| HETATM | 368 | Pt | 19.93133 | 16.95217 | 24.09601 | Pt | 0 | 0 | 0.00000 |
| HETATM | 369 | Pt | 19.93024 | 25.32566 | 24.09781 | Pt | 0 | 0 | 0.00000 |
| HETATM | 370 | Pt | 5.42439  | 28.11626 | 24.10061 | Pt | 0 | 0 | 0.00000 |
| HETATM | 371 | Pt | 5.42534  | 11.37046 | 24.10330 | Pt | 0 | 0 | 0.00000 |
| HETATM | 372 | Pt | 5.42467  | 19.74177 | 24.10294 | Pt | 0 | 0 | 0.00000 |
| HETATM | 373 | Pt | 12.67660 | 32.30430 | 24.10381 | Pt | 0 | 0 | 0.00000 |
| HETATM | 374 | Pt | 12.67900 | 15.55647 | 24.09535 | Pt | 0 | 0 | 0.00000 |
| HETATM | 375 | Pt | 12.67644 | 23.92833 | 24.10359 | Pt | 0 | 0 | 0.00000 |
| HETATM | 376 | Pt | 19.92743 | 36.48978 | 24.10247 | Pt | 0 | 0 | 0.00000 |
| HETATM | 377 | Pt | 19.92687 | 19.74312 | 24.10282 | Pt | 0 | 0 | 0.00000 |
| HETATM | 378 | Pt | 19.92797 | 28.11651 | 24.10239 | Pt | 0 | 0 | 0.00000 |
| HETATM | 379 | Pt | 7.84488  | 23.93271 | 24.10011 | Pt | 0 | 0 | 0.00000 |
| HETATM | 380 | Pt | 7.84490  | 7.18384  | 24.10112 | Pt | 0 | 0 | 0.00000 |
| HETATM | 381 | Pt | 7.84496  | 15.55620 | 24.10077 | Pt | 0 | 0 | 0.00000 |
| HETATM | 382 | Pt | 15.09697 | 28.11881 | 24.10234 | Pt | 0 | 0 | 0.00000 |
| HETATM | 383 | Pt | 15.09502 | 11.37248 | 24.10789 | Pt | 0 | 0 | 0.00000 |
| HETATM | 384 | Pt | 15.09415 | 19.74491 | 24.10761 | Pt | 0 | 0 | 0.00000 |
| HETATM | 385 | Pt | 0.59362  | 19.74472 | 24.10254 | Pt | 0 | 0 | 0.00000 |
| HETATM | 386 | Pt | 0.59401  | 2.99787  | 24.10066 | Pt | 0 | 0 | 0.00000 |
| HETATM | 387 | Pt | 0.59347  | 11.37244 | 24.10318 | Pt | 0 | 0 | 0.00000 |
| HETATM | 388 | Pt | 7.84540  | 26.71868 | 24.10132 | Pt | 0 | 0 | 0.00000 |
| HETATM | 389 | Pt | 7.84377  | 9.96950  | 24.09872 | Pt | 0 | 0 | 0.00000 |
| HETATM | 390 | Pt | 7.84395  | 18.34862 | 24.09569 | Pt | 0 | 0 | 0.00000 |
| HETATM | 391 | Pt | 15.09702 | 30.90583 | 24.10269 | Pt | 0 | 0 | 0.00000 |
| HETATM | 392 | Pt | 15.09730 | 14.15776 | 24.10191 | Pt | 0 | 0 | 0.00000 |
| HETATM | 393 | Pt | 15.09602 | 22.53158 | 24.10415 | Pt | 0 | 0 | 0.00000 |
| HETATM | 394 | Pt | 0.59333  | 22.53142 | 24.10222 | Pt | 0 | 0 | 0.00000 |
| HETATM | 395 | Pt | 0.59343  | 5.78513  | 24.10141 | Pt | 0 | 0 | 0.00000 |
| HETATM | 396 | Pt | 0.59359  | 14.15884 | 24.10290 | Pt | 0 | 0 | 0.00000 |
| HETATM | 397 | Pt | 7.84429  | 29.51169 | 24.09088 | Pt | 0 | 0 | 0.00000 |

|        |     |    |          |          |          |    |   |   |         |
|--------|-----|----|----------|----------|----------|----|---|---|---------|
| HETATM | 398 | Pt | 7.84488  | 12.76615 | 24.09274 | Pt | 0 | 0 | 0.00000 |
| HETATM | 399 | Pt | 7.84341  | 21.13975 | 24.08919 | Pt | 0 | 0 | 0.00000 |
| HETATM | 400 | Pt | 15.09549 | 33.69969 | 24.09410 | Pt | 0 | 0 | 0.00000 |
| HETATM | 401 | Pt | 15.09442 | 16.95167 | 24.09274 | Pt | 0 | 0 | 0.00000 |
| HETATM | 402 | Pt | 15.09574 | 25.32519 | 24.09231 | Pt | 0 | 0 | 0.00000 |
| HETATM | 403 | Pt | 0.59265  | 25.32496 | 24.09088 | Pt | 0 | 0 | 0.00000 |
| HETATM | 404 | Pt | 0.59186  | 8.57887  | 24.09244 | Pt | 0 | 0 | 0.00000 |
| HETATM | 405 | Pt | 0.59255  | 16.95177 | 24.09231 | Pt | 0 | 0 | 0.00000 |
| HETATM | 406 | Pt | 3.81366  | 22.53048 | 26.39967 | Pt | 0 | 0 | 0.00000 |
| HETATM | 407 | Pt | 3.81279  | 5.78263  | 26.39885 | Pt | 0 | 0 | 0.00000 |
| HETATM | 408 | Pt | 3.81784  | 14.16002 | 26.40462 | Pt | 0 | 0 | 0.00000 |
| HETATM | 409 | Pt | 11.06528 | 26.71615 | 26.40054 | Pt | 0 | 0 | 0.00000 |
| HETATM | 410 | Pt | 11.06340 | 9.97280  | 26.40668 | Pt | 0 | 0 | 0.00000 |
| HETATM | 411 | Pt | 11.05831 | 18.34642 | 26.37286 | Pt | 0 | 0 | 0.00000 |
| HETATM | 412 | Pt | 18.31687 | 30.90422 | 26.40061 | Pt | 0 | 0 | 0.00000 |
| HETATM | 413 | Pt | 18.31996 | 14.15704 | 26.39934 | Pt | 0 | 0 | 0.00000 |
| HETATM | 414 | Pt | 18.31473 | 22.53005 | 26.40182 | Pt | 0 | 0 | 0.00000 |
| HETATM | 415 | Pt | 3.81183  | 25.32558 | 26.37034 | Pt | 0 | 0 | 0.00000 |
| HETATM | 416 | Pt | 3.81071  | 8.57749  | 26.37115 | Pt | 0 | 0 | 0.00000 |
| HETATM | 417 | Pt | 3.81522  | 16.95165 | 26.37554 | Pt | 0 | 0 | 0.00000 |
| HETATM | 418 | Pt | 11.06388 | 29.51162 | 26.37219 | Pt | 0 | 0 | 0.00000 |
| HETATM | 419 | Pt | 11.05879 | 12.76909 | 26.37397 | Pt | 0 | 0 | 0.00000 |
| HETATM | 420 | Pt | 11.06340 | 21.13320 | 26.37756 | Pt | 0 | 0 | 0.00000 |
| HETATM | 421 | Pt | 18.31505 | 33.69908 | 26.37274 | Pt | 0 | 0 | 0.00000 |
| HETATM | 422 | Pt | 18.31917 | 16.95274 | 26.36998 | Pt | 0 | 0 | 0.00000 |
| HETATM | 423 | Pt | 18.31501 | 25.32515 | 26.37246 | Pt | 0 | 0 | 0.00000 |
| HETATM | 424 | Pt | 3.81339  | 2.99902  | 26.39866 | Pt | 0 | 0 | 0.00000 |
| HETATM | 425 | Pt | 3.81450  | 11.37434 | 26.40142 | Pt | 0 | 0 | 0.00000 |
| HETATM | 426 | Pt | 3.81569  | 19.74561 | 26.40152 | Pt | 0 | 0 | 0.00000 |
| HETATM | 427 | Pt | 11.06520 | 7.18638  | 26.40133 | Pt | 0 | 0 | 0.00000 |
| HETATM | 428 | Pt | 11.06581 | 15.55838 | 26.37004 | Pt | 0 | 0 | 0.00000 |
| HETATM | 429 | Pt | 11.06463 | 23.93078 | 26.40152 | Pt | 0 | 0 | 0.00000 |
| HETATM | 430 | Pt | 18.31649 | 11.37291 | 26.40132 | Pt | 0 | 0 | 0.00000 |
| HETATM | 431 | Pt | 18.31495 | 19.74618 | 26.40142 | Pt | 0 | 0 | 0.00000 |
| HETATM | 432 | Pt | 18.31692 | 28.12001 | 26.40059 | Pt | 0 | 0 | 0.00000 |
| HETATM | 433 | Pt | 6.23338  | 23.92840 | 26.36945 | Pt | 0 | 0 | 0.00000 |
| HETATM | 434 | Pt | 6.23302  | 7.17736  | 26.37014 | Pt | 0 | 0 | 0.00000 |
| HETATM | 435 | Pt | 6.24447  | 15.55800 | 26.38799 | Pt | 0 | 0 | 0.00000 |
| HETATM | 436 | Pt | 13.48614 | 28.11310 | 26.37222 | Pt | 0 | 0 | 0.00000 |
| HETATM | 437 | Pt | 13.48272 | 11.37217 | 26.38630 | Pt | 0 | 0 | 0.00000 |
| HETATM | 438 | Pt | 13.47681 | 19.73359 | 26.38799 | Pt | 0 | 0 | 0.00000 |
| HETATM | 439 | Pt | 20.73830 | 32.30013 | 26.37222 | Pt | 0 | 0 | 0.00000 |
| HETATM | 440 | Pt | 20.74039 | 15.55319 | 26.37014 | Pt | 0 | 0 | 0.00000 |
| HETATM | 441 | Pt | 20.73757 | 23.92733 | 26.37285 | Pt | 0 | 0 | 0.00000 |
| HETATM | 442 | Pt | 6.23416  | 26.72411 | 26.37034 | Pt | 0 | 0 | 0.00000 |
| HETATM | 443 | Pt | 6.23158  | 9.97397  | 26.36998 | Pt | 0 | 0 | 0.00000 |
| HETATM | 444 | Pt | 6.23909  | 18.34788 | 26.37757 | Pt | 0 | 0 | 0.00000 |
| HETATM | 445 | Pt | 13.48624 | 30.91116 | 26.37274 | Pt | 0 | 0 | 0.00000 |
| HETATM | 446 | Pt | 13.48491 | 14.16982 | 26.37396 | Pt | 0 | 0 | 0.00000 |
| HETATM | 447 | Pt | 13.48450 | 22.53421 | 26.37554 | Pt | 0 | 0 | 0.00000 |
| HETATM | 448 | Pt | 20.73828 | 35.09714 | 26.37219 | Pt | 0 | 0 | 0.00000 |
| HETATM | 449 | Pt | 20.73899 | 18.35103 | 26.37115 | Pt | 0 | 0 | 0.00000 |
| HETATM | 450 | Pt | 20.73829 | 26.72424 | 26.37246 | Pt | 0 | 0 | 0.00000 |
| HETATM | 451 | Pt | 6.24112  | 4.39027  | 26.36807 | Pt | 0 | 0 | 0.00000 |
| HETATM | 452 | Pt | 6.24609  | 12.76706 | 26.37169 | Pt | 0 | 0 | 0.00000 |
| HETATM | 453 | Pt | 6.24112  | 21.14051 | 26.36474 | Pt | 0 | 0 | 0.00000 |
| HETATM | 454 | Pt | 13.49226 | 8.58036  | 26.37356 | Pt | 0 | 0 | 0.00000 |
| HETATM | 455 | Pt | 13.48282 | 16.94651 | 26.37910 | Pt | 0 | 0 | 0.00000 |
| HETATM | 456 | Pt | 13.49277 | 25.32391 | 26.37036 | Pt | 0 | 0 | 0.00000 |
| HETATM | 457 | Pt | 20.74669 | 12.76436 | 26.36836 | Pt | 0 | 0 | 0.00000 |
| HETATM | 458 | Pt | 20.74400 | 21.13904 | 26.37045 | Pt | 0 | 0 | 0.00000 |
| HETATM | 459 | Pt | 20.74545 | 29.51221 | 26.36983 | Pt | 0 | 0 | 0.00000 |
| HETATM | 460 | Pt | 8.65388  | 25.32498 | 26.39967 | Pt | 0 | 0 | 0.00000 |

|        |     |    |          |          |          |    |   |   |         |
|--------|-----|----|----------|----------|----------|----|---|---|---------|
| HETATM | 461 | Pt | 8.65234  | 8.57543  | 26.39934 | Pt | 0 | 0 | 0.00000 |
| HETATM | 462 | Pt | 8.65505  | 16.95890 | 26.37286 | Pt | 0 | 0 | 0.00000 |
| HETATM | 463 | Pt | 15.90575 | 29.51216 | 26.40061 | Pt | 0 | 0 | 0.00000 |
| HETATM | 464 | Pt | 15.90427 | 12.76768 | 26.40668 | Pt | 0 | 0 | 0.00000 |
| HETATM | 465 | Pt | 15.90082 | 21.13612 | 26.40462 | Pt | 0 | 0 | 0.00000 |
| HETATM | 466 | Pt | 1.40316  | 21.13772 | 26.40054 | Pt | 0 | 0 | 0.00000 |
| HETATM | 467 | Pt | 1.40301  | 4.39134  | 26.39885 | Pt | 0 | 0 | 0.00000 |
| HETATM | 468 | Pt | 1.40371  | 12.76646 | 26.40182 | Pt | 0 | 0 | 0.00000 |
| HETATM | 469 | Pt | 8.64560  | 28.12334 | 26.36891 | Pt | 0 | 0 | 0.00000 |
| HETATM | 470 | Pt | 8.64032  | 11.37057 | 26.35909 | Pt | 0 | 0 | 0.00000 |
| HETATM | 471 | Pt | 8.64583  | 19.74992 | 26.36930 | Pt | 0 | 0 | 0.00000 |
| HETATM | 472 | Pt | 15.89680 | 32.31178 | 26.37052 | Pt | 0 | 0 | 0.00000 |
| HETATM | 473 | Pt | 15.90531 | 15.56501 | 26.35909 | Pt | 0 | 0 | 0.00000 |
| HETATM | 474 | Pt | 15.89596 | 23.93640 | 26.37062 | Pt | 0 | 0 | 0.00000 |
| HETATM | 475 | Pt | 1.39435  | 23.93683 | 26.36891 | Pt | 0 | 0 | 0.00000 |
| HETATM | 476 | Pt | 1.39345  | 7.19048  | 26.36923 | Pt | 0 | 0 | 0.00000 |
| HETATM | 477 | Pt | 1.39516  | 15.56436 | 26.37062 | Pt | 0 | 0 | 0.00000 |
| HETATM | 478 | Pt | 8.64507  | 5.77749  | 26.36836 | Pt | 0 | 0 | 0.00000 |
| HETATM | 479 | Pt | 8.65516  | 14.15925 | 26.37910 | Pt | 0 | 0 | 0.00000 |
| HETATM | 480 | Pt | 8.64390  | 22.52775 | 26.36474 | Pt | 0 | 0 | 0.00000 |
| HETATM | 481 | Pt | 15.89573 | 9.96800  | 26.37356 | Pt | 0 | 0 | 0.00000 |
| HETATM | 482 | Pt | 15.89303 | 18.33672 | 26.37169 | Pt | 0 | 0 | 0.00000 |
| HETATM | 483 | Pt | 15.89698 | 26.71294 | 26.36983 | Pt | 0 | 0 | 0.00000 |
| HETATM | 484 | Pt | 1.39467  | 1.59217  | 26.36806 | Pt | 0 | 0 | 0.00000 |
| HETATM | 485 | Pt | 1.39373  | 9.96715  | 26.37045 | Pt | 0 | 0 | 0.00000 |
| HETATM | 486 | Pt | 1.39513  | 18.33934 | 26.37036 | Pt | 0 | 0 | 0.00000 |
| HETATM | 487 | Pt | 2.21198  | 19.75253 | 28.73850 | Pt | 0 | 0 | 0.00000 |
| HETATM | 488 | Pt | 2.21032  | 3.00527  | 28.73643 | Pt | 0 | 0 | 0.00000 |
| HETATM | 489 | Pt | 2.20875  | 11.38040 | 28.73951 | Pt | 0 | 0 | 0.00000 |
| HETATM | 490 | Pt | 9.45950  | 23.93829 | 28.73772 | Pt | 0 | 0 | 0.00000 |
| HETATM | 491 | Pt | 9.45995  | 7.18680  | 28.73550 | Pt | 0 | 0 | 0.00000 |
| HETATM | 492 | Pt | 9.43762  | 15.56446 | 28.72892 | Pt | 0 | 0 | 0.00000 |
| HETATM | 493 | Pt | 16.71325 | 28.12576 | 28.73822 | Pt | 0 | 0 | 0.00000 |
| HETATM | 494 | Pt | 16.71825 | 11.37897 | 28.74280 | Pt | 0 | 0 | 0.00000 |
| HETATM | 495 | Pt | 16.71434 | 19.75330 | 28.73863 | Pt | 0 | 0 | 0.00000 |
| HETATM | 496 | Pt | 2.21088  | 22.52354 | 28.73726 | Pt | 0 | 0 | 0.00000 |
| HETATM | 497 | Pt | 2.20979  | 5.77654  | 28.73731 | Pt | 0 | 0 | 0.00000 |
| HETATM | 498 | Pt | 2.21248  | 14.15314 | 28.73922 | Pt | 0 | 0 | 0.00000 |
| HETATM | 499 | Pt | 9.46127  | 26.70956 | 28.73727 | Pt | 0 | 0 | 0.00000 |
| HETATM | 500 | Pt | 9.45370  | 9.95564  | 28.73962 | Pt | 0 | 0 | 0.00000 |
| HETATM | 501 | Pt | 9.44115  | 18.37238 | 28.63173 | Pt | 0 | 0 | 0.00000 |
| HETATM | 502 | Pt | 16.71347 | 30.89727 | 28.73817 | Pt | 0 | 0 | 0.00000 |
| HETATM | 503 | Pt | 16.72399 | 14.15313 | 28.73962 | Pt | 0 | 0 | 0.00000 |
| HETATM | 504 | Pt | 16.70946 | 22.52297 | 28.73922 | Pt | 0 | 0 | 0.00000 |
| HETATM | 505 | Pt | 2.21515  | 25.32515 | 28.69127 | Pt | 0 | 0 | 0.00000 |
| HETATM | 506 | Pt | 2.21309  | 8.57793  | 28.69226 | Pt | 0 | 0 | 0.00000 |
| HETATM | 507 | Pt | 2.21963  | 16.95232 | 28.69386 | Pt | 0 | 0 | 0.00000 |
| HETATM | 508 | Pt | 9.46645  | 29.50965 | 28.69240 | Pt | 0 | 0 | 0.00000 |
| HETATM | 509 | Pt | 9.44142  | 12.75418 | 28.64715 | Pt | 0 | 0 | 0.00000 |
| HETATM | 510 | Pt | 9.45206  | 21.13503 | 28.67237 | Pt | 0 | 0 | 0.00000 |
| HETATM | 511 | Pt | 16.71839 | 33.69876 | 28.69358 | Pt | 0 | 0 | 0.00000 |
| HETATM | 512 | Pt | 16.73141 | 16.95349 | 28.68952 | Pt | 0 | 0 | 0.00000 |
| HETATM | 513 | Pt | 16.71693 | 25.32399 | 28.69257 | Pt | 0 | 0 | 0.00000 |
| HETATM | 514 | Pt | 4.61176  | 21.13944 | 28.73772 | Pt | 0 | 0 | 0.00000 |
| HETATM | 515 | Pt | 4.60951  | 4.39044  | 28.73643 | Pt | 0 | 0 | 0.00000 |
| HETATM | 516 | Pt | 4.60864  | 12.76408 | 28.73863 | Pt | 0 | 0 | 0.00000 |
| HETATM | 517 | Pt | 11.86048 | 25.32310 | 28.73850 | Pt | 0 | 0 | 0.00000 |
| HETATM | 518 | Pt | 11.85906 | 8.57352  | 28.74279 | Pt | 0 | 0 | 0.00000 |
| HETATM | 519 | Pt | 11.87464 | 16.97148 | 28.72892 | Pt | 0 | 0 | 0.00000 |
| HETATM | 520 | Pt | 19.11378 | 29.51171 | 28.73822 | Pt | 0 | 0 | 0.00000 |
| HETATM | 521 | Pt | 19.11874 | 12.76331 | 28.73551 | Pt | 0 | 0 | 0.00000 |
| HETATM | 522 | Pt | 19.11257 | 21.13983 | 28.73951 | Pt | 0 | 0 | 0.00000 |
| HETATM | 523 | Pt | 4.62952  | 23.94736 | 28.63668 | Pt | 0 | 0 | 0.00000 |

|                      |     |    |          |          |          |    |   |   |         |
|----------------------|-----|----|----------|----------|----------|----|---|---|---------|
| HETATM               | 524 | Pt | 4.62849  | 7.19669  | 28.63672 | Pt | 0 | 0 | 0.00000 |
| HETATM               | 525 | Pt | 4.64118  | 15.57627 | 28.64569 | Pt | 0 | 0 | 0.00000 |
| HETATM               | 526 | Pt | 11.88250 | 28.13090 | 28.63831 | Pt | 0 | 0 | 0.00000 |
| HETATM               | 527 | Pt | 11.87054 | 11.37541 | 28.66224 | Pt | 0 | 0 | 0.00000 |
| HETATM               | 528 | Pt | 11.85619 | 19.75488 | 28.68182 | Pt | 0 | 0 | 0.00000 |
| HETATM               | 529 | Pt | 19.13496 | 32.31878 | 28.63846 | Pt | 0 | 0 | 0.00000 |
| HETATM               | 530 | Pt | 19.14089 | 15.57285 | 28.63623 | Pt | 0 | 0 | 0.00000 |
| HETATM               | 531 | Pt | 19.13311 | 23.94595 | 28.63894 | Pt | 0 | 0 | 0.00000 |
| HETATM               | 532 | Pt | 4.63031  | 26.70500 | 28.63649 | Pt | 0 | 0 | 0.00000 |
| HETATM               | 533 | Pt | 4.62635  | 9.95452  | 28.63784 | Pt | 0 | 0 | 0.00000 |
| HETATM               | 534 | Pt | 4.63724  | 18.33423 | 28.64110 | Pt | 0 | 0 | 0.00000 |
| HETATM               | 535 | Pt | 11.88264 | 30.88901 | 28.63847 | Pt | 0 | 0 | 0.00000 |
| HETATM               | 536 | Pt | 11.87405 | 14.15847 | 28.72870 | Pt | 0 | 0 | 0.00000 |
| HETATM               | 537 | Pt | 11.87614 | 22.51361 | 28.64110 | Pt | 0 | 0 | 0.00000 |
| HETATM               | 538 | Pt | 19.13604 | 35.07677 | 28.63847 | Pt | 0 | 0 | 0.00000 |
| HETATM               | 539 | Pt | 19.13863 | 18.33318 | 28.63784 | Pt | 0 | 0 | 0.00000 |
| HETATM               | 540 | Pt | 19.13420 | 26.70444 | 28.63844 | Pt | 0 | 0 | 0.00000 |
| HETATM               | 541 | Pt | 7.02994  | 22.54872 | 28.68842 | Pt | 0 | 0 | 0.00000 |
| HETATM               | 542 | Pt | 7.03203  | 5.79358  | 28.69130 | Pt | 0 | 0 | 0.00000 |
| HETATM               | 543 | Pt | 7.03390  | 14.15556 | 28.70181 | Pt | 0 | 0 | 0.00000 |
| HETATM               | 544 | Pt | 14.28436 | 26.72817 | 28.69243 | Pt | 0 | 0 | 0.00000 |
| HETATM               | 545 | Pt | 14.28388 | 9.98452  | 28.69829 | Pt | 0 | 0 | 0.00000 |
| HETATM               | 546 | Pt | 14.29665 | 18.34871 | 28.70181 | Pt | 0 | 0 | 0.00000 |
| HETATM               | 547 | Pt | 21.53857 | 30.91640 | 28.69243 | Pt | 0 | 0 | 0.00000 |
| HETATM               | 548 | Pt | 21.53926 | 14.16934 | 28.69130 | Pt | 0 | 0 | 0.00000 |
| HETATM               | 549 | Pt | 21.53606 | 22.54430 | 28.69296 | Pt | 0 | 0 | 0.00000 |
| HETATM               | 550 | Pt | 7.01889  | 25.32687 | 28.63668 | Pt | 0 | 0 | 0.00000 |
| HETATM               | 551 | Pt | 7.01574  | 8.57239  | 28.63623 | Pt | 0 | 0 | 0.00000 |
| HETATM               | 552 | Pt | 7.03635  | 16.97214 | 28.68182 | Pt | 0 | 0 | 0.00000 |
| HETATM               | 553 | Pt | 14.27166 | 29.51095 | 28.63846 | Pt | 0 | 0 | 0.00000 |
| HETATM               | 554 | Pt | 14.28601 | 12.76998 | 28.66224 | Pt | 0 | 0 | 0.00000 |
| HETATM               | 555 | Pt | 14.26263 | 21.13122 | 28.64569 | Pt | 0 | 0 | 0.00000 |
| HETATM               | 556 | Pt | 21.52470 | 33.69782 | 28.63831 | Pt | 0 | 0 | 0.00000 |
| HETATM               | 557 | Pt | 21.52591 | 16.95242 | 28.63672 | Pt | 0 | 0 | 0.00000 |
| HETATM               | 558 | Pt | 21.52367 | 25.32614 | 28.63894 | Pt | 0 | 0 | 0.00000 |
| HETATM               | 559 | Pt | 7.03287  | 28.10666 | 28.69127 | Pt | 0 | 0 | 0.00000 |
| HETATM               | 560 | Pt | 7.02482  | 11.34938 | 28.68952 | Pt | 0 | 0 | 0.00000 |
| HETATM               | 561 | Pt | 7.04317  | 19.74425 | 28.67237 | Pt | 0 | 0 | 0.00000 |
| HETATM               | 562 | Pt | 14.28485 | 32.29376 | 28.69358 | Pt | 0 | 0 | 0.00000 |
| HETATM               | 563 | Pt | 14.30652 | 15.56305 | 28.64715 | Pt | 0 | 0 | 0.00000 |
| HETATM               | 564 | Pt | 14.28171 | 23.91637 | 28.69386 | Pt | 0 | 0 | 0.00000 |
| HETATM               | 565 | Pt | 21.53869 | 36.47956 | 28.69240 | Pt | 0 | 0 | 0.00000 |
| HETATM               | 566 | Pt | 21.53742 | 19.73484 | 28.69226 | Pt | 0 | 0 | 0.00000 |
| HETATM               | 567 | Pt | 21.53834 | 28.10764 | 28.69257 | Pt | 0 | 0 | 0.00000 |
| HETATM               | 568 | O  | 3.01065  | 21.13974 | 29.85817 | O  | 0 | 0 | 0.00000 |
| HETATM               | 569 | O  | 3.01016  | 4.39025  | 29.85718 | O  | 0 | 0 | 0.00000 |
| HETATM               | 570 | O  | 3.01163  | 12.76603 | 29.85947 | O  | 0 | 0 | 0.00000 |
| HETATM               | 571 | O  | 10.25979 | 25.32504 | 29.85817 | O  | 0 | 0 | 0.00000 |
| HETATM               | 572 | O  | 10.25396 | 8.56740  | 29.85964 | O  | 0 | 0 | 0.00000 |
| HETATM               | 573 | O  | 11.06031 | 15.56792 | 29.83996 | O  | 0 | 0 | 0.00000 |
| HETATM               | 574 | O  | 17.51339 | 29.51177 | 29.85822 | O  | 0 | 0 | 0.00000 |
| HETATM               | 575 | O  | 17.52611 | 12.76598 | 29.85963 | O  | 0 | 0 | 0.00000 |
| HETATM               | 576 | O  | 17.51115 | 21.13733 | 29.85947 | O  | 0 | 0 | 0.00000 |
| UNIT ENERGY kcal     |     |    |          |          |          |    |   |   |         |
| ENERGY -73576.477655 |     |    |          |          |          |    |   |   |         |
| END                  |     |    |          |          |          |    |   |   |         |
