# Supplementary material for: Development of a ReaxFF potential for Pt–O systems describing the energetics and dynamics of Pt-oxide formation
Source: Royal Society of Chemistry journal article supplement (doi:10.1039/c4cp03111c), 2014-01-01
Supplement: c4cp03111c1.zip [file c4cp03111c1.zip]

```

XTLGRF 200
DESCRP IS
REMARK Pt111_0.06ML_8x8x7_30.0_vac hcp-displacement
FIXATOMS      1      128
CRYSTX      22.32970      22.32970      43.67409      90.00000      90.00000      60.00000
FORMAT ATOM      (a6,lx,i5,lx,a5,lx,a3,lx,a1,lx,a5,3f10.5,lx,a5,i3,i2,lx,f8.5)
HETATM      1 Pt      2.01636      12.06239      14.99197      Pt      0 0      0.00000
HETATM      2 Pt      2.01636      23.22724      14.99197      Pt      0 0      0.00000
HETATM      3 Pt      11.68540      17.64482      14.99197      Pt      0 0      0.00000
HETATM      4 Pt      11.68540      28.80967      14.99197      Pt      0 0      0.00000
HETATM      5 Pt      2.01636      14.85360      14.99197      Pt      0 0      0.00000
HETATM      6 Pt      2.01636      3.68875      14.99197      Pt      0 0      0.00000
HETATM      7 Pt      11.68540      20.43603      14.99197      Pt      0 0      0.00000
HETATM      8 Pt      11.68540      9.27118      14.99197      Pt      0 0      0.00000
HETATM      9 Pt      2.01636      17.64481      14.99197      Pt      0 0      0.00000
HETATM     10 Pt      2.01636      6.47996      14.99197      Pt      0 0      0.00000
HETATM     11 Pt      11.68540      23.22723      14.99197      Pt      0 0      0.00000
HETATM     12 Pt      11.68540      12.06239      14.99197      Pt      0 0      0.00000
HETATM     13 Pt      2.01636      20.43603      14.99197      Pt      0 0      0.00000
HETATM     14 Pt      2.01636      9.27118      14.99197      Pt      0 0      0.00000
HETATM     15 Pt      11.68540      26.01846      14.99197      Pt      0 0      0.00000
HETATM     16 Pt      11.68540      14.85361      14.99197      Pt      0 0      0.00000
HETATM     17 Pt      4.43362      13.45800      14.99197      Pt      0 0      0.00000
HETATM     18 Pt      4.43362      24.62285      14.99197      Pt      0 0      0.00000
HETATM     19 Pt      14.10266      19.04043      14.99197      Pt      0 0      0.00000
HETATM     20 Pt      14.10266      30.20527      14.99197      Pt      0 0      0.00000
HETATM     21 Pt      4.43362      16.24921      14.99197      Pt      0 0      0.00000
HETATM     22 Pt      4.43362      5.08436      14.99197      Pt      0 0      0.00000
HETATM     23 Pt      14.10266      21.83164      14.99197      Pt      0 0      0.00000
HETATM     24 Pt      14.10266      10.66678      14.99197      Pt      0 0      0.00000
HETATM     25 Pt      4.43362      19.04042      14.99197      Pt      0 0      0.00000
HETATM     26 Pt      4.43362      7.87557      14.99197      Pt      0 0      0.00000
HETATM     27 Pt      14.10266      24.62285      14.99197      Pt      0 0      0.00000
HETATM     28 Pt      14.10266      13.45799      14.99197      Pt      0 0      0.00000
HETATM     29 Pt      4.43362      21.83163      14.99197      Pt      0 0      0.00000
HETATM     30 Pt      4.43362      10.66678      14.99197      Pt      0 0      0.00000
HETATM     31 Pt      14.10266      27.41406      14.99197      Pt      0 0      0.00000
HETATM     32 Pt      14.10266      16.24920      14.99197      Pt      0 0      0.00000
HETATM     33 Pt      6.85088      14.85360      14.99197      Pt      0 0      0.00000
HETATM     34 Pt      6.85088      26.01845      14.99197      Pt      0 0      0.00000
HETATM     35 Pt      16.51992      20.43603      14.99197      Pt      0 0      0.00000
HETATM     36 Pt      16.51992      31.60088      14.99197      Pt      0 0      0.00000
HETATM     37 Pt      6.85088      17.64481      14.99197      Pt      0 0      0.00000
HETATM     38 Pt      6.85088      6.47996      14.99197      Pt      0 0      0.00000
HETATM     39 Pt      16.51992      23.22723      14.99197      Pt      0 0      0.00000
HETATM     40 Pt      16.51992      12.06239      14.99197      Pt      0 0      0.00000
HETATM     41 Pt      6.85088      20.43603      14.99197      Pt      0 0      0.00000
HETATM     42 Pt      6.85088      9.27118      14.99197      Pt      0 0      0.00000
HETATM     43 Pt      16.51992      26.01846      14.99197      Pt      0 0      0.00000
HETATM     44 Pt      16.51992      14.85361      14.99197      Pt      0 0      0.00000
HETATM     45 Pt      6.85088      23.22724      14.99197      Pt      0 0      0.00000
HETATM     46 Pt      6.85088      12.06239      14.99197      Pt      0 0      0.00000
HETATM     47 Pt      16.51992      28.80967      14.99197      Pt      0 0      0.00000
HETATM     48 Pt      16.51992      17.64482      14.99197      Pt      0 0      0.00000
HETATM     49 Pt      9.26814      16.24921      14.99197      Pt      0 0      0.00000
HETATM     50 Pt      9.26814      27.41406      14.99197      Pt      0 0      0.00000
HETATM     51 Pt      18.93718      21.83164      14.99197      Pt      0 0      0.00000
HETATM     52 Pt      18.93718      32.99648      14.99197      Pt      0 0      0.00000
HETATM     53 Pt      9.26814      19.04042      14.99197      Pt      0 0      0.00000
HETATM     54 Pt      9.26814      7.87557      14.99197      Pt      0 0      0.00000
HETATM     55 Pt      18.93718      24.62285      14.99197      Pt      0 0      0.00000
HETATM     56 Pt      18.93718      13.45799      14.99197      Pt      0 0      0.00000
HETATM     57 Pt      9.26814      21.83163      14.99197      Pt      0 0      0.00000

```

|        |     |    |          |          |          |    |   |   |         |
|--------|-----|----|----------|----------|----------|----|---|---|---------|
| HETATM | 58  | Pt | 9.26814  | 10.66678 | 14.99197 | Pt | 0 | 0 | 0.00000 |
| HETATM | 59  | Pt | 18.93718 | 27.41406 | 14.99197 | Pt | 0 | 0 | 0.00000 |
| HETATM | 60  | Pt | 18.93718 | 16.24920 | 14.99197 | Pt | 0 | 0 | 0.00000 |
| HETATM | 61  | Pt | 9.26814  | 24.62284 | 14.99197 | Pt | 0 | 0 | 0.00000 |
| HETATM | 62  | Pt | 9.26814  | 13.45799 | 14.99197 | Pt | 0 | 0 | 0.00000 |
| HETATM | 63  | Pt | 18.93718 | 30.20527 | 14.99197 | Pt | 0 | 0 | 0.00000 |
| HETATM | 64  | Pt | 18.93718 | 19.04041 | 14.99197 | Pt | 0 | 0 | 0.00000 |
| HETATM | 65  | Pt | 2.82211  | 13.45800 | 17.27099 | Pt | 0 | 0 | 0.00000 |
| HETATM | 66  | Pt | 2.82211  | 2.29315  | 17.27099 | Pt | 0 | 0 | 0.00000 |
| HETATM | 67  | Pt | 12.49115 | 19.04043 | 17.27099 | Pt | 0 | 0 | 0.00000 |
| HETATM | 68  | Pt | 12.49115 | 7.87557  | 17.27099 | Pt | 0 | 0 | 0.00000 |
| HETATM | 69  | Pt | 2.82211  | 16.24921 | 17.27099 | Pt | 0 | 0 | 0.00000 |
| HETATM | 70  | Pt | 2.82211  | 5.08436  | 17.27099 | Pt | 0 | 0 | 0.00000 |
| HETATM | 71  | Pt | 12.49115 | 21.83164 | 17.27099 | Pt | 0 | 0 | 0.00000 |
| HETATM | 72  | Pt | 12.49115 | 10.66678 | 17.27099 | Pt | 0 | 0 | 0.00000 |
| HETATM | 73  | Pt | 2.82211  | 19.04042 | 17.27099 | Pt | 0 | 0 | 0.00000 |
| HETATM | 74  | Pt | 2.82211  | 7.87557  | 17.27099 | Pt | 0 | 0 | 0.00000 |
| HETATM | 75  | Pt | 12.49115 | 24.62285 | 17.27099 | Pt | 0 | 0 | 0.00000 |
| HETATM | 76  | Pt | 12.49115 | 13.45799 | 17.27099 | Pt | 0 | 0 | 0.00000 |
| HETATM | 77  | Pt | 2.82211  | 21.83163 | 17.27099 | Pt | 0 | 0 | 0.00000 |
| HETATM | 78  | Pt | 2.82211  | 10.66678 | 17.27099 | Pt | 0 | 0 | 0.00000 |
| HETATM | 79  | Pt | 12.49115 | 27.41406 | 17.27099 | Pt | 0 | 0 | 0.00000 |
| HETATM | 80  | Pt | 12.49115 | 16.24920 | 17.27099 | Pt | 0 | 0 | 0.00000 |
| HETATM | 81  | Pt | 5.23937  | 14.85360 | 17.27099 | Pt | 0 | 0 | 0.00000 |
| HETATM | 82  | Pt | 5.23937  | 3.68875  | 17.27099 | Pt | 0 | 0 | 0.00000 |
| HETATM | 83  | Pt | 14.90841 | 20.43603 | 17.27099 | Pt | 0 | 0 | 0.00000 |
| HETATM | 84  | Pt | 14.90841 | 9.27118  | 17.27099 | Pt | 0 | 0 | 0.00000 |
| HETATM | 85  | Pt | 5.23937  | 17.64481 | 17.27099 | Pt | 0 | 0 | 0.00000 |
| HETATM | 86  | Pt | 5.23937  | 6.47996  | 17.27099 | Pt | 0 | 0 | 0.00000 |
| HETATM | 87  | Pt | 14.90841 | 23.22723 | 17.27099 | Pt | 0 | 0 | 0.00000 |
| HETATM | 88  | Pt | 14.90841 | 12.06239 | 17.27099 | Pt | 0 | 0 | 0.00000 |
| HETATM | 89  | Pt | 5.23937  | 20.43603 | 17.27099 | Pt | 0 | 0 | 0.00000 |
| HETATM | 90  | Pt | 5.23937  | 9.27118  | 17.27099 | Pt | 0 | 0 | 0.00000 |
| HETATM | 91  | Pt | 14.90841 | 26.01846 | 17.27099 | Pt | 0 | 0 | 0.00000 |
| HETATM | 92  | Pt | 14.90841 | 14.85361 | 17.27099 | Pt | 0 | 0 | 0.00000 |
| HETATM | 93  | Pt | 5.23937  | 23.22724 | 17.27099 | Pt | 0 | 0 | 0.00000 |
| HETATM | 94  | Pt | 5.23937  | 12.06239 | 17.27099 | Pt | 0 | 0 | 0.00000 |
| HETATM | 95  | Pt | 14.90841 | 28.80967 | 17.27099 | Pt | 0 | 0 | 0.00000 |
| HETATM | 96  | Pt | 14.90841 | 17.64482 | 17.27099 | Pt | 0 | 0 | 0.00000 |
| HETATM | 97  | Pt | 7.65663  | 16.24921 | 17.27099 | Pt | 0 | 0 | 0.00000 |
| HETATM | 98  | Pt | 7.65663  | 5.08436  | 17.27099 | Pt | 0 | 0 | 0.00000 |
| HETATM | 99  | Pt | 17.32567 | 21.83164 | 17.27099 | Pt | 0 | 0 | 0.00000 |
| HETATM | 100 | Pt | 17.32567 | 10.66678 | 17.27099 | Pt | 0 | 0 | 0.00000 |
| HETATM | 101 | Pt | 7.65663  | 19.04042 | 17.27099 | Pt | 0 | 0 | 0.00000 |
| HETATM | 102 | Pt | 7.65663  | 7.87557  | 17.27099 | Pt | 0 | 0 | 0.00000 |
| HETATM | 103 | Pt | 17.32567 | 24.62285 | 17.27099 | Pt | 0 | 0 | 0.00000 |
| HETATM | 104 | Pt | 17.32567 | 13.45799 | 17.27099 | Pt | 0 | 0 | 0.00000 |
| HETATM | 105 | Pt | 7.65663  | 21.83163 | 17.27099 | Pt | 0 | 0 | 0.00000 |
| HETATM | 106 | Pt | 7.65663  | 10.66678 | 17.27099 | Pt | 0 | 0 | 0.00000 |
| HETATM | 107 | Pt | 17.32567 | 27.41406 | 17.27099 | Pt | 0 | 0 | 0.00000 |
| HETATM | 108 | Pt | 17.32567 | 16.24920 | 17.27099 | Pt | 0 | 0 | 0.00000 |
| HETATM | 109 | Pt | 7.65663  | 24.62284 | 17.27099 | Pt | 0 | 0 | 0.00000 |
| HETATM | 110 | Pt | 7.65663  | 13.45799 | 17.27099 | Pt | 0 | 0 | 0.00000 |
| HETATM | 111 | Pt | 17.32567 | 30.20527 | 17.27099 | Pt | 0 | 0 | 0.00000 |
| HETATM | 112 | Pt | 17.32567 | 19.04041 | 17.27099 | Pt | 0 | 0 | 0.00000 |
| HETATM | 113 | Pt | 10.07390 | 17.64481 | 17.27099 | Pt | 0 | 0 | 0.00000 |
| HETATM | 114 | Pt | 10.07390 | 6.47996  | 17.27099 | Pt | 0 | 0 | 0.00000 |
| HETATM | 115 | Pt | 0.40485  | 12.06238 | 17.27099 | Pt | 0 | 0 | 0.00000 |
| HETATM | 116 | Pt | 0.40485  | 0.89754  | 17.27099 | Pt | 0 | 0 | 0.00000 |
| HETATM | 117 | Pt | 10.07390 | 20.43603 | 17.27099 | Pt | 0 | 0 | 0.00000 |
| HETATM | 118 | Pt | 10.07390 | 9.27118  | 17.27099 | Pt | 0 | 0 | 0.00000 |
| HETATM | 119 | Pt | 0.40485  | 14.85361 | 17.27099 | Pt | 0 | 0 | 0.00000 |
| HETATM | 120 | Pt | 0.40485  | 3.68876  | 17.27099 | Pt | 0 | 0 | 0.00000 |

|        |     |    |          |          |          |    |   |   |         |
|--------|-----|----|----------|----------|----------|----|---|---|---------|
| HETATM | 121 | Pt | 10.07390 | 23.22724 | 17.27099 | Pt | 0 | 0 | 0.00000 |
| HETATM | 122 | Pt | 10.07390 | 12.06239 | 17.27099 | Pt | 0 | 0 | 0.00000 |
| HETATM | 123 | Pt | 0.40485  | 17.64482 | 17.27099 | Pt | 0 | 0 | 0.00000 |
| HETATM | 124 | Pt | 0.40485  | 6.47997  | 17.27099 | Pt | 0 | 0 | 0.00000 |
| HETATM | 125 | Pt | 10.07390 | 26.01845 | 17.27099 | Pt | 0 | 0 | 0.00000 |
| HETATM | 126 | Pt | 10.07390 | 14.85360 | 17.27099 | Pt | 0 | 0 | 0.00000 |
| HETATM | 127 | Pt | 0.40485  | 20.43603 | 17.27099 | Pt | 0 | 0 | 0.00000 |
| HETATM | 128 | Pt | 0.40485  | 9.27118  | 17.27099 | Pt | 0 | 0 | 0.00000 |
| HETATM | 129 | Pt | 3.62770  | 14.85332 | 19.55081 | Pt | 0 | 0 | 0.00000 |
| HETATM | 130 | Pt | 3.62769  | 3.68846  | 19.55082 | Pt | 0 | 0 | 0.00000 |
| HETATM | 131 | Pt | 13.29674 | 20.43573 | 19.55083 | Pt | 0 | 0 | 0.00000 |
| HETATM | 132 | Pt | 13.29674 | 9.27088  | 19.55082 | Pt | 0 | 0 | 0.00000 |
| HETATM | 133 | Pt | 3.62792  | 17.64462 | 19.54928 | Pt | 0 | 0 | 0.00000 |
| HETATM | 134 | Pt | 3.62792  | 6.47977  | 19.54929 | Pt | 0 | 0 | 0.00000 |
| HETATM | 135 | Pt | 13.29697 | 23.22705 | 19.54929 | Pt | 0 | 0 | 0.00000 |
| HETATM | 136 | Pt | 13.29696 | 12.06220 | 19.54929 | Pt | 0 | 0 | 0.00000 |
| HETATM | 137 | Pt | 3.62792  | 20.43622 | 19.54929 | Pt | 0 | 0 | 0.00000 |
| HETATM | 138 | Pt | 3.62792  | 9.27137  | 19.54929 | Pt | 0 | 0 | 0.00000 |
| HETATM | 139 | Pt | 13.29697 | 26.01865 | 19.54929 | Pt | 0 | 0 | 0.00000 |
| HETATM | 140 | Pt | 13.29696 | 14.85379 | 19.54929 | Pt | 0 | 0 | 0.00000 |
| HETATM | 141 | Pt | 3.62770  | 23.22753 | 19.55081 | Pt | 0 | 0 | 0.00000 |
| HETATM | 142 | Pt | 3.62769  | 12.06268 | 19.55082 | Pt | 0 | 0 | 0.00000 |
| HETATM | 143 | Pt | 13.29674 | 28.80996 | 19.55082 | Pt | 0 | 0 | 0.00000 |
| HETATM | 144 | Pt | 13.29673 | 17.64511 | 19.55082 | Pt | 0 | 0 | 0.00000 |
| HETATM | 145 | Pt | 6.04493  | 16.24916 | 19.54929 | Pt | 0 | 0 | 0.00000 |
| HETATM | 146 | Pt | 6.04494  | 5.08431  | 19.54929 | Pt | 0 | 0 | 0.00000 |
| HETATM | 147 | Pt | 15.71398 | 21.83159 | 19.54929 | Pt | 0 | 0 | 0.00000 |
| HETATM | 148 | Pt | 15.71398 | 10.66674 | 19.54929 | Pt | 0 | 0 | 0.00000 |
| HETATM | 149 | Pt | 6.04513  | 19.04042 | 19.54885 | Pt | 0 | 0 | 0.00000 |
| HETATM | 150 | Pt | 6.04512  | 7.87558  | 19.54885 | Pt | 0 | 0 | 0.00000 |
| HETATM | 151 | Pt | 15.71417 | 24.62284 | 19.54885 | Pt | 0 | 0 | 0.00000 |
| HETATM | 152 | Pt | 15.71417 | 13.45800 | 19.54885 | Pt | 0 | 0 | 0.00000 |
| HETATM | 153 | Pt | 6.04493  | 21.83168 | 19.54929 | Pt | 0 | 0 | 0.00000 |
| HETATM | 154 | Pt | 6.04494  | 10.66683 | 19.54929 | Pt | 0 | 0 | 0.00000 |
| HETATM | 155 | Pt | 15.71398 | 27.41411 | 19.54929 | Pt | 0 | 0 | 0.00000 |
| HETATM | 156 | Pt | 15.71398 | 16.24926 | 19.54929 | Pt | 0 | 0 | 0.00000 |
| HETATM | 157 | Pt | 6.04451  | 24.62284 | 19.55034 | Pt | 0 | 0 | 0.00000 |
| HETATM | 158 | Pt | 6.04451  | 13.45799 | 19.55034 | Pt | 0 | 0 | 0.00000 |
| HETATM | 159 | Pt | 15.71355 | 30.20527 | 19.55035 | Pt | 0 | 0 | 0.00000 |
| HETATM | 160 | Pt | 15.71355 | 19.04042 | 19.55034 | Pt | 0 | 0 | 0.00000 |
| HETATM | 161 | Pt | 8.46252  | 17.64495 | 19.54929 | Pt | 0 | 0 | 0.00000 |
| HETATM | 162 | Pt | 8.46253  | 6.48010  | 19.54929 | Pt | 0 | 0 | 0.00000 |
| HETATM | 163 | Pt | 18.13157 | 23.22738 | 19.54929 | Pt | 0 | 0 | 0.00000 |
| HETATM | 164 | Pt | 18.13157 | 12.06253 | 19.54928 | Pt | 0 | 0 | 0.00000 |
| HETATM | 165 | Pt | 8.46253  | 20.43588 | 19.54929 | Pt | 0 | 0 | 0.00000 |
| HETATM | 166 | Pt | 8.46253  | 9.27104  | 19.54929 | Pt | 0 | 0 | 0.00000 |
| HETATM | 167 | Pt | 18.13157 | 26.01831 | 19.54929 | Pt | 0 | 0 | 0.00000 |
| HETATM | 168 | Pt | 18.13157 | 14.85346 | 19.54928 | Pt | 0 | 0 | 0.00000 |
| HETATM | 169 | Pt | 8.46223  | 23.22697 | 19.54941 | Pt | 0 | 0 | 0.00000 |
| HETATM | 170 | Pt | 8.46223  | 12.06211 | 19.54942 | Pt | 0 | 0 | 0.00000 |
| HETATM | 171 | Pt | 18.13127 | 28.80939 | 19.54941 | Pt | 0 | 0 | 0.00000 |
| HETATM | 172 | Pt | 18.13128 | 17.64454 | 19.54941 | Pt | 0 | 0 | 0.00000 |
| HETATM | 173 | Pt | 8.46223  | 26.01873 | 19.54941 | Pt | 0 | 0 | 0.00000 |
| HETATM | 174 | Pt | 8.46223  | 14.85388 | 19.54942 | Pt | 0 | 0 | 0.00000 |
| HETATM | 175 | Pt | 18.13127 | 31.60115 | 19.54941 | Pt | 0 | 0 | 0.00000 |
| HETATM | 176 | Pt | 18.13127 | 20.43630 | 19.54942 | Pt | 0 | 0 | 0.00000 |
| HETATM | 177 | Pt | 10.87999 | 19.04042 | 19.55082 | Pt | 0 | 0 | 0.00000 |
| HETATM | 178 | Pt | 10.87999 | 7.87557  | 19.55082 | Pt | 0 | 0 | 0.00000 |
| HETATM | 179 | Pt | 1.21095  | 13.45799 | 19.55082 | Pt | 0 | 0 | 0.00000 |
| HETATM | 180 | Pt | 1.21095  | 2.29315  | 19.55082 | Pt | 0 | 0 | 0.00000 |
| HETATM | 181 | Pt | 10.87996 | 21.83110 | 19.55035 | Pt | 0 | 0 | 0.00000 |
| HETATM | 182 | Pt | 10.87995 | 10.66625 | 19.55035 | Pt | 0 | 0 | 0.00000 |
| HETATM | 183 | Pt | 1.21092  | 16.24868 | 19.55034 | Pt | 0 | 0 | 0.00000 |

|        |     |    |          |          |          |    |   |   |         |
|--------|-----|----|----------|----------|----------|----|---|---|---------|
| HETATM | 184 | Pt | 1.21092  | 5.08382  | 19.55035 | Pt | 0 | 0 | 0.00000 |
| HETATM | 185 | Pt | 10.87996 | 24.62284 | 19.54942 | Pt | 0 | 0 | 0.00000 |
| HETATM | 186 | Pt | 10.87997 | 13.45799 | 19.54943 | Pt | 0 | 0 | 0.00000 |
| HETATM | 187 | Pt | 1.21092  | 19.04042 | 19.54941 | Pt | 0 | 0 | 0.00000 |
| HETATM | 188 | Pt | 1.21092  | 7.87557  | 19.54941 | Pt | 0 | 0 | 0.00000 |
| HETATM | 189 | Pt | 10.87996 | 27.41460 | 19.55035 | Pt | 0 | 0 | 0.00000 |
| HETATM | 190 | Pt | 10.87996 | 16.24975 | 19.55035 | Pt | 0 | 0 | 0.00000 |
| HETATM | 191 | Pt | 1.21092  | 21.83217 | 19.55034 | Pt | 0 | 0 | 0.00000 |
| HETATM | 192 | Pt | 1.21092  | 10.66732 | 19.55034 | Pt | 0 | 0 | 0.00000 |
| HETATM | 193 | Pt | 2.01703  | 12.06356 | 21.83215 | Pt | 0 | 0 | 0.00000 |
| HETATM | 194 | Pt | 2.01703  | 23.22840 | 21.83214 | Pt | 0 | 0 | 0.00000 |
| HETATM | 195 | Pt | 11.68607 | 17.64597 | 21.83214 | Pt | 0 | 0 | 0.00000 |
| HETATM | 196 | Pt | 11.68607 | 28.81082 | 21.83214 | Pt | 0 | 0 | 0.00000 |
| HETATM | 197 | Pt | 2.01703  | 14.85244 | 21.83216 | Pt | 0 | 0 | 0.00000 |
| HETATM | 198 | Pt | 2.01703  | 3.68759  | 21.83214 | Pt | 0 | 0 | 0.00000 |
| HETATM | 199 | Pt | 11.68607 | 20.43487 | 21.83214 | Pt | 0 | 0 | 0.00000 |
| HETATM | 200 | Pt | 11.68607 | 9.27001  | 21.83214 | Pt | 0 | 0 | 0.00000 |
| HETATM | 201 | Pt | 2.01694  | 17.64403 | 21.82813 | Pt | 0 | 0 | 0.00000 |
| HETATM | 202 | Pt | 2.01695  | 6.47918  | 21.82813 | Pt | 0 | 0 | 0.00000 |
| HETATM | 203 | Pt | 11.68599 | 23.22646 | 21.82812 | Pt | 0 | 0 | 0.00000 |
| HETATM | 204 | Pt | 11.68599 | 12.06162 | 21.82812 | Pt | 0 | 0 | 0.00000 |
| HETATM | 205 | Pt | 2.01694  | 20.43681 | 21.82812 | Pt | 0 | 0 | 0.00000 |
| HETATM | 206 | Pt | 2.01695  | 9.27196  | 21.82814 | Pt | 0 | 0 | 0.00000 |
| HETATM | 207 | Pt | 11.68599 | 26.01924 | 21.82813 | Pt | 0 | 0 | 0.00000 |
| HETATM | 208 | Pt | 11.68598 | 14.85439 | 21.82813 | Pt | 0 | 0 | 0.00000 |
| HETATM | 209 | Pt | 4.43228  | 13.45799 | 21.83216 | Pt | 0 | 0 | 0.00000 |
| HETATM | 210 | Pt | 4.43228  | 24.62285 | 21.83215 | Pt | 0 | 0 | 0.00000 |
| HETATM | 211 | Pt | 14.10132 | 19.04043 | 21.83214 | Pt | 0 | 0 | 0.00000 |
| HETATM | 212 | Pt | 14.10132 | 30.20527 | 21.83214 | Pt | 0 | 0 | 0.00000 |
| HETATM | 213 | Pt | 4.43355  | 16.24908 | 21.82839 | Pt | 0 | 0 | 0.00000 |
| HETATM | 214 | Pt | 4.43354  | 5.08423  | 21.82839 | Pt | 0 | 0 | 0.00000 |
| HETATM | 215 | Pt | 14.10259 | 21.83150 | 21.82839 | Pt | 0 | 0 | 0.00000 |
| HETATM | 216 | Pt | 14.10258 | 10.66665 | 21.82838 | Pt | 0 | 0 | 0.00000 |
| HETATM | 217 | Pt | 4.43362  | 19.04042 | 21.82680 | Pt | 0 | 0 | 0.00000 |
| HETATM | 218 | Pt | 4.43363  | 7.87557  | 21.82679 | Pt | 0 | 0 | 0.00000 |
| HETATM | 219 | Pt | 14.10267 | 24.62284 | 21.82678 | Pt | 0 | 0 | 0.00000 |
| HETATM | 220 | Pt | 14.10266 | 13.45799 | 21.82678 | Pt | 0 | 0 | 0.00000 |
| HETATM | 221 | Pt | 4.43354  | 21.83177 | 21.82839 | Pt | 0 | 0 | 0.00000 |
| HETATM | 222 | Pt | 4.43354  | 10.66692 | 21.82840 | Pt | 0 | 0 | 0.00000 |
| HETATM | 223 | Pt | 14.10258 | 27.41420 | 21.82839 | Pt | 0 | 0 | 0.00000 |
| HETATM | 224 | Pt | 14.10258 | 16.24935 | 21.82838 | Pt | 0 | 0 | 0.00000 |
| HETATM | 225 | Pt | 6.84992  | 14.85372 | 21.82813 | Pt | 0 | 0 | 0.00000 |
| HETATM | 226 | Pt | 6.84991  | 26.01857 | 21.82813 | Pt | 0 | 0 | 0.00000 |
| HETATM | 227 | Pt | 16.51896 | 20.43614 | 21.82812 | Pt | 0 | 0 | 0.00000 |
| HETATM | 228 | Pt | 16.51895 | 31.60099 | 21.82812 | Pt | 0 | 0 | 0.00000 |
| HETATM | 229 | Pt | 6.85088  | 17.64481 | 21.82679 | Pt | 0 | 0 | 0.00000 |
| HETATM | 230 | Pt | 6.85088  | 6.47997  | 21.82679 | Pt | 0 | 0 | 0.00000 |
| HETATM | 231 | Pt | 16.51992 | 23.22724 | 21.82678 | Pt | 0 | 0 | 0.00000 |
| HETATM | 232 | Pt | 16.51992 | 12.06239 | 21.82678 | Pt | 0 | 0 | 0.00000 |
| HETATM | 233 | Pt | 6.85089  | 20.43603 | 21.82679 | Pt | 0 | 0 | 0.00000 |
| HETATM | 234 | Pt | 6.85088  | 9.27117  | 21.82679 | Pt | 0 | 0 | 0.00000 |
| HETATM | 235 | Pt | 16.51993 | 26.01845 | 21.82678 | Pt | 0 | 0 | 0.00000 |
| HETATM | 236 | Pt | 16.51992 | 14.85360 | 21.82678 | Pt | 0 | 0 | 0.00000 |
| HETATM | 237 | Pt | 6.84992  | 23.22713 | 21.82812 | Pt | 0 | 0 | 0.00000 |
| HETATM | 238 | Pt | 6.84991  | 12.06228 | 21.82814 | Pt | 0 | 0 | 0.00000 |
| HETATM | 239 | Pt | 16.51895 | 28.80955 | 21.82812 | Pt | 0 | 0 | 0.00000 |
| HETATM | 240 | Pt | 16.51896 | 17.64470 | 21.82813 | Pt | 0 | 0 | 0.00000 |
| HETATM | 241 | Pt | 9.26853  | 16.25010 | 21.82811 | Pt | 0 | 0 | 0.00000 |
| HETATM | 242 | Pt | 9.26853  | 27.41496 | 21.82812 | Pt | 0 | 0 | 0.00000 |
| HETATM | 243 | Pt | 18.93757 | 21.83253 | 21.82813 | Pt | 0 | 0 | 0.00000 |
| HETATM | 244 | Pt | 18.93757 | 32.99738 | 21.82813 | Pt | 0 | 0 | 0.00000 |
| HETATM | 245 | Pt | 9.26829  | 19.04042 | 21.82839 | Pt | 0 | 0 | 0.00000 |
| HETATM | 246 | Pt | 9.26830  | 7.87557  | 21.82839 | Pt | 0 | 0 | 0.00000 |

|        |     |    |          |          |          |    |   |   |         |
|--------|-----|----|----------|----------|----------|----|---|---|---------|
| HETATM | 247 | Pt | 18.93735 | 24.62284 | 21.82839 | Pt | 0 | 0 | 0.00000 |
| HETATM | 248 | Pt | 18.93734 | 13.45800 | 21.82838 | Pt | 0 | 0 | 0.00000 |
| HETATM | 249 | Pt | 9.26853  | 21.83074 | 21.82812 | Pt | 0 | 0 | 0.00000 |
| HETATM | 250 | Pt | 9.26853  | 10.66588 | 21.82812 | Pt | 0 | 0 | 0.00000 |
| HETATM | 251 | Pt | 18.93757 | 27.41317 | 21.82814 | Pt | 0 | 0 | 0.00000 |
| HETATM | 252 | Pt | 18.93757 | 16.24832 | 21.82812 | Pt | 0 | 0 | 0.00000 |
| HETATM | 253 | Pt | 9.26814  | 24.62284 | 21.82585 | Pt | 0 | 0 | 0.00000 |
| HETATM | 254 | Pt | 9.26814  | 13.45800 | 21.82585 | Pt | 0 | 0 | 0.00000 |
| HETATM | 255 | Pt | 18.93719 | 30.20527 | 21.82585 | Pt | 0 | 0 | 0.00000 |
| HETATM | 256 | Pt | 18.93718 | 19.04042 | 21.82585 | Pt | 0 | 0 | 0.00000 |
| HETATM | 257 | Pt | 2.82211  | 13.45800 | 24.12155 | Pt | 0 | 0 | 0.00000 |
| HETATM | 258 | Pt | 2.82212  | 2.29314  | 24.12152 | Pt | 0 | 0 | 0.00000 |
| HETATM | 259 | Pt | 12.49116 | 19.04043 | 24.12153 | Pt | 0 | 0 | 0.00000 |
| HETATM | 260 | Pt | 12.49116 | 7.87557  | 24.12154 | Pt | 0 | 0 | 0.00000 |
| HETATM | 261 | Pt | 2.82400  | 16.24696 | 24.10964 | Pt | 0 | 0 | 0.00000 |
| HETATM | 262 | Pt | 2.82400  | 5.08211  | 24.10963 | Pt | 0 | 0 | 0.00000 |
| HETATM | 263 | Pt | 12.49305 | 21.82938 | 24.10965 | Pt | 0 | 0 | 0.00000 |
| HETATM | 264 | Pt | 12.49304 | 10.66453 | 24.10964 | Pt | 0 | 0 | 0.00000 |
| HETATM | 265 | Pt | 2.82096  | 19.04042 | 24.10474 | Pt | 0 | 0 | 0.00000 |
| HETATM | 266 | Pt | 2.82096  | 7.87557  | 24.10472 | Pt | 0 | 0 | 0.00000 |
| HETATM | 267 | Pt | 12.49001 | 24.62285 | 24.10473 | Pt | 0 | 0 | 0.00000 |
| HETATM | 268 | Pt | 12.48999 | 13.45800 | 24.10473 | Pt | 0 | 0 | 0.00000 |
| HETATM | 269 | Pt | 2.82400  | 21.83388 | 24.10963 | Pt | 0 | 0 | 0.00000 |
| HETATM | 270 | Pt | 2.82399  | 10.66904 | 24.10965 | Pt | 0 | 0 | 0.00000 |
| HETATM | 271 | Pt | 12.49304 | 27.41631 | 24.10964 | Pt | 0 | 0 | 0.00000 |
| HETATM | 272 | Pt | 12.49304 | 16.25146 | 24.10963 | Pt | 0 | 0 | 0.00000 |
| HETATM | 273 | Pt | 5.23648  | 14.85410 | 24.10964 | Pt | 0 | 0 | 0.00000 |
| HETATM | 274 | Pt | 5.23649  | 3.68925  | 24.10963 | Pt | 0 | 0 | 0.00000 |
| HETATM | 275 | Pt | 14.90552 | 20.43653 | 24.10964 | Pt | 0 | 0 | 0.00000 |
| HETATM | 276 | Pt | 14.90553 | 9.27168  | 24.10963 | Pt | 0 | 0 | 0.00000 |
| HETATM | 277 | Pt | 5.23963  | 17.64526 | 24.10455 | Pt | 0 | 0 | 0.00000 |
| HETATM | 278 | Pt | 5.23963  | 6.48041  | 24.10455 | Pt | 0 | 0 | 0.00000 |
| HETATM | 279 | Pt | 14.90867 | 23.22768 | 24.10455 | Pt | 0 | 0 | 0.00000 |
| HETATM | 280 | Pt | 14.90868 | 12.06284 | 24.10454 | Pt | 0 | 0 | 0.00000 |
| HETATM | 281 | Pt | 5.23963  | 20.43559 | 24.10455 | Pt | 0 | 0 | 0.00000 |
| HETATM | 282 | Pt | 5.23963  | 9.27073  | 24.10454 | Pt | 0 | 0 | 0.00000 |
| HETATM | 283 | Pt | 14.90867 | 26.01802 | 24.10455 | Pt | 0 | 0 | 0.00000 |
| HETATM | 284 | Pt | 14.90868 | 14.85316 | 24.10454 | Pt | 0 | 0 | 0.00000 |
| HETATM | 285 | Pt | 5.23649  | 23.22673 | 24.10964 | Pt | 0 | 0 | 0.00000 |
| HETATM | 286 | Pt | 5.23648  | 12.06190 | 24.10964 | Pt | 0 | 0 | 0.00000 |
| HETATM | 287 | Pt | 14.90553 | 28.80916 | 24.10965 | Pt | 0 | 0 | 0.00000 |
| HETATM | 288 | Pt | 14.90553 | 17.64431 | 24.10964 | Pt | 0 | 0 | 0.00000 |
| HETATM | 289 | Pt | 7.65722  | 16.24820 | 24.10474 | Pt | 0 | 0 | 0.00000 |
| HETATM | 290 | Pt | 7.65722  | 5.08335  | 24.10473 | Pt | 0 | 0 | 0.00000 |
| HETATM | 291 | Pt | 17.32626 | 21.83063 | 24.10473 | Pt | 0 | 0 | 0.00000 |
| HETATM | 292 | Pt | 17.32626 | 10.66578 | 24.10473 | Pt | 0 | 0 | 0.00000 |
| HETATM | 293 | Pt | 7.65614  | 19.04042 | 24.10456 | Pt | 0 | 0 | 0.00000 |
| HETATM | 294 | Pt | 7.65613  | 7.87557  | 24.10455 | Pt | 0 | 0 | 0.00000 |
| HETATM | 295 | Pt | 17.32517 | 24.62285 | 24.10454 | Pt | 0 | 0 | 0.00000 |
| HETATM | 296 | Pt | 17.32517 | 13.45800 | 24.10454 | Pt | 0 | 0 | 0.00000 |
| HETATM | 297 | Pt | 7.65722  | 21.83264 | 24.10473 | Pt | 0 | 0 | 0.00000 |
| HETATM | 298 | Pt | 7.65722  | 10.66779 | 24.10474 | Pt | 0 | 0 | 0.00000 |
| HETATM | 299 | Pt | 17.32626 | 27.41507 | 24.10473 | Pt | 0 | 0 | 0.00000 |
| HETATM | 300 | Pt | 17.32626 | 16.25021 | 24.10472 | Pt | 0 | 0 | 0.00000 |
| HETATM | 301 | Pt | 7.65789  | 24.62284 | 24.10342 | Pt | 0 | 0 | 0.00000 |
| HETATM | 302 | Pt | 7.65788  | 13.45800 | 24.10343 | Pt | 0 | 0 | 0.00000 |
| HETATM | 303 | Pt | 17.32692 | 30.20527 | 24.10343 | Pt | 0 | 0 | 0.00000 |
| HETATM | 304 | Pt | 17.32693 | 19.04042 | 24.10342 | Pt | 0 | 0 | 0.00000 |
| HETATM | 305 | Pt | 10.07490 | 17.64757 | 24.10964 | Pt | 0 | 0 | 0.00000 |
| HETATM | 306 | Pt | 10.07490 | 6.48272  | 24.10964 | Pt | 0 | 0 | 0.00000 |
| HETATM | 307 | Pt | 0.40587  | 12.06515 | 24.10965 | Pt | 0 | 0 | 0.00000 |
| HETATM | 308 | Pt | 0.40586  | 0.90029  | 24.10963 | Pt | 0 | 0 | 0.00000 |
| HETATM | 309 | Pt | 10.07490 | 20.43327 | 24.10964 | Pt | 0 | 0 | 0.00000 |

|        |     |    |          |          |          |    |   |   |         |
|--------|-----|----|----------|----------|----------|----|---|---|---------|
| HETATM | 310 | Pt | 10.07491 | 9.26842  | 24.10964 | Pt | 0 | 0 | 0.00000 |
| HETATM | 311 | Pt | 0.40587  | 14.85084 | 24.10964 | Pt | 0 | 0 | 0.00000 |
| HETATM | 312 | Pt | 0.40586  | 3.68600  | 24.10963 | Pt | 0 | 0 | 0.00000 |
| HETATM | 313 | Pt | 10.07327 | 23.22832 | 24.10342 | Pt | 0 | 0 | 0.00000 |
| HETATM | 314 | Pt | 10.07327 | 12.06348 | 24.10344 | Pt | 0 | 0 | 0.00000 |
| HETATM | 315 | Pt | 0.40424  | 17.64589 | 24.10343 | Pt | 0 | 0 | 0.00000 |
| HETATM | 316 | Pt | 0.40423  | 6.48104  | 24.10342 | Pt | 0 | 0 | 0.00000 |
| HETATM | 317 | Pt | 10.07327 | 26.01738 | 24.10343 | Pt | 0 | 0 | 0.00000 |
| HETATM | 318 | Pt | 10.07328 | 14.85251 | 24.10343 | Pt | 0 | 0 | 0.00000 |
| HETATM | 319 | Pt | 0.40422  | 20.43495 | 24.10342 | Pt | 0 | 0 | 0.00000 |
| HETATM | 320 | Pt | 0.40423  | 9.27011  | 24.10343 | Pt | 0 | 0 | 0.00000 |
| HETATM | 321 | Pt | 3.62668  | 14.85152 | 26.41076 | Pt | 0 | 0 | 0.00000 |
| HETATM | 322 | Pt | 3.62666  | 3.68666  | 26.41080 | Pt | 0 | 0 | 0.00000 |
| HETATM | 323 | Pt | 13.29571 | 20.43394 | 26.41078 | Pt | 0 | 0 | 0.00000 |
| HETATM | 324 | Pt | 13.29571 | 9.26911  | 26.41075 | Pt | 0 | 0 | 0.00000 |
| HETATM | 325 | Pt | 3.62594  | 17.64721 | 26.38086 | Pt | 0 | 0 | 0.00000 |
| HETATM | 326 | Pt | 3.62594  | 6.48236  | 26.38087 | Pt | 0 | 0 | 0.00000 |
| HETATM | 327 | Pt | 13.29498 | 23.22963 | 26.38086 | Pt | 0 | 0 | 0.00000 |
| HETATM | 328 | Pt | 13.29498 | 12.06479 | 26.38085 | Pt | 0 | 0 | 0.00000 |
| HETATM | 329 | Pt | 3.62594  | 20.43363 | 26.38087 | Pt | 0 | 0 | 0.00000 |
| HETATM | 330 | Pt | 3.62594  | 9.26879  | 26.38087 | Pt | 0 | 0 | 0.00000 |
| HETATM | 331 | Pt | 13.29499 | 26.01606 | 26.38087 | Pt | 0 | 0 | 0.00000 |
| HETATM | 332 | Pt | 13.29499 | 14.85121 | 26.38086 | Pt | 0 | 0 | 0.00000 |
| HETATM | 333 | Pt | 3.62668  | 23.22932 | 26.41076 | Pt | 0 | 0 | 0.00000 |
| HETATM | 334 | Pt | 3.62666  | 12.06448 | 26.41080 | Pt | 0 | 0 | 0.00000 |
| HETATM | 335 | Pt | 13.29570 | 28.81174 | 26.41075 | Pt | 0 | 0 | 0.00000 |
| HETATM | 336 | Pt | 13.29571 | 17.64689 | 26.41078 | Pt | 0 | 0 | 0.00000 |
| HETATM | 337 | Pt | 6.04817  | 16.24874 | 26.38086 | Pt | 0 | 0 | 0.00000 |
| HETATM | 338 | Pt | 6.04817  | 5.08388  | 26.38087 | Pt | 0 | 0 | 0.00000 |
| HETATM | 339 | Pt | 15.71721 | 21.83116 | 26.38087 | Pt | 0 | 0 | 0.00000 |
| HETATM | 340 | Pt | 15.71721 | 10.66631 | 26.38085 | Pt | 0 | 0 | 0.00000 |
| HETATM | 341 | Pt | 6.04513  | 19.04042 | 26.38256 | Pt | 0 | 0 | 0.00000 |
| HETATM | 342 | Pt | 6.04513  | 7.87557  | 26.38255 | Pt | 0 | 0 | 0.00000 |
| HETATM | 343 | Pt | 15.71418 | 24.62285 | 26.38255 | Pt | 0 | 0 | 0.00000 |
| HETATM | 344 | Pt | 15.71418 | 13.45800 | 26.38254 | Pt | 0 | 0 | 0.00000 |
| HETATM | 345 | Pt | 6.04817  | 21.83211 | 26.38087 | Pt | 0 | 0 | 0.00000 |
| HETATM | 346 | Pt | 6.04817  | 10.66725 | 26.38087 | Pt | 0 | 0 | 0.00000 |
| HETATM | 347 | Pt | 15.71721 | 27.41453 | 26.38086 | Pt | 0 | 0 | 0.00000 |
| HETATM | 348 | Pt | 15.71720 | 16.24968 | 26.38085 | Pt | 0 | 0 | 0.00000 |
| HETATM | 349 | Pt | 6.05639  | 24.62284 | 26.37323 | Pt | 0 | 0 | 0.00000 |
| HETATM | 350 | Pt | 6.05638  | 13.45800 | 26.37324 | Pt | 0 | 0 | 0.00000 |
| HETATM | 351 | Pt | 15.72544 | 30.20527 | 26.37321 | Pt | 0 | 0 | 0.00000 |
| HETATM | 352 | Pt | 15.72542 | 19.04043 | 26.37323 | Pt | 0 | 0 | 0.00000 |
| HETATM | 353 | Pt | 8.46127  | 17.64195 | 26.38086 | Pt | 0 | 0 | 0.00000 |
| HETATM | 354 | Pt | 8.46128  | 6.47710  | 26.38087 | Pt | 0 | 0 | 0.00000 |
| HETATM | 355 | Pt | 18.13032 | 23.22438 | 26.38087 | Pt | 0 | 0 | 0.00000 |
| HETATM | 356 | Pt | 18.13033 | 12.05953 | 26.38085 | Pt | 0 | 0 | 0.00000 |
| HETATM | 357 | Pt | 8.46128  | 20.43889 | 26.38086 | Pt | 0 | 0 | 0.00000 |
| HETATM | 358 | Pt | 8.46127  | 9.27405  | 26.38086 | Pt | 0 | 0 | 0.00000 |
| HETATM | 359 | Pt | 18.13033 | 26.02131 | 26.38087 | Pt | 0 | 0 | 0.00000 |
| HETATM | 360 | Pt | 18.13032 | 14.85646 | 26.38086 | Pt | 0 | 0 | 0.00000 |
| HETATM | 361 | Pt | 8.46255  | 23.22752 | 26.38778 | Pt | 0 | 0 | 0.00000 |
| HETATM | 362 | Pt | 8.46256  | 12.06267 | 26.38779 | Pt | 0 | 0 | 0.00000 |
| HETATM | 363 | Pt | 18.13159 | 28.80993 | 26.38779 | Pt | 0 | 0 | 0.00000 |
| HETATM | 364 | Pt | 18.13159 | 17.64509 | 26.38778 | Pt | 0 | 0 | 0.00000 |
| HETATM | 365 | Pt | 8.46255  | 26.01818 | 26.38778 | Pt | 0 | 0 | 0.00000 |
| HETATM | 366 | Pt | 8.46255  | 14.85332 | 26.38779 | Pt | 0 | 0 | 0.00000 |
| HETATM | 367 | Pt | 18.13158 | 31.60061 | 26.38779 | Pt | 0 | 0 | 0.00000 |
| HETATM | 368 | Pt | 18.13159 | 20.43576 | 26.38778 | Pt | 0 | 0 | 0.00000 |
| HETATM | 369 | Pt | 10.88205 | 19.04042 | 26.41076 | Pt | 0 | 0 | 0.00000 |
| HETATM | 370 | Pt | 10.88205 | 7.87557  | 26.41077 | Pt | 0 | 0 | 0.00000 |
| HETATM | 371 | Pt | 1.21301  | 13.45799 | 26.41078 | Pt | 0 | 0 | 0.00000 |
| HETATM | 372 | Pt | 1.21301  | 2.29316  | 26.41077 | Pt | 0 | 0 | 0.00000 |

|        |     |    |          |          |          |    |   |   |         |
|--------|-----|----|----------|----------|----------|----|---|---|---------|
| HETATM | 373 | Pt | 10.87402 | 21.84139 | 26.37322 | Pt | 0 | 0 | 0.00000 |
| HETATM | 374 | Pt | 10.87402 | 10.67654 | 26.37323 | Pt | 0 | 0 | 0.00000 |
| HETATM | 375 | Pt | 1.20498  | 16.25897 | 26.37322 | Pt | 0 | 0 | 0.00000 |
| HETATM | 376 | Pt | 1.20499  | 5.09410  | 26.37324 | Pt | 0 | 0 | 0.00000 |
| HETATM | 377 | Pt | 10.87934 | 24.62284 | 26.38778 | Pt | 0 | 0 | 0.00000 |
| HETATM | 378 | Pt | 10.87933 | 13.45799 | 26.38778 | Pt | 0 | 0 | 0.00000 |
| HETATM | 379 | Pt | 1.21030  | 19.04042 | 26.38779 | Pt | 0 | 0 | 0.00000 |
| HETATM | 380 | Pt | 1.21029  | 7.87557  | 26.38778 | Pt | 0 | 0 | 0.00000 |
| HETATM | 381 | Pt | 10.87402 | 27.40431 | 26.37323 | Pt | 0 | 0 | 0.00000 |
| HETATM | 382 | Pt | 10.87402 | 16.23947 | 26.37322 | Pt | 0 | 0 | 0.00000 |
| HETATM | 383 | Pt | 1.20498  | 21.82188 | 26.37320 | Pt | 0 | 0 | 0.00000 |
| HETATM | 384 | Pt | 1.20499  | 10.65705 | 26.37325 | Pt | 0 | 0 | 0.00000 |
| HETATM | 385 | Pt | 2.02058  | 12.06970 | 28.74638 | Pt | 0 | 0 | 0.00000 |
| HETATM | 386 | Pt | 2.02059  | 23.23452 | 28.74606 | Pt | 0 | 0 | 0.00000 |
| HETATM | 387 | Pt | 11.68959 | 17.65210 | 28.74621 | Pt | 0 | 0 | 0.00000 |
| HETATM | 388 | Pt | 11.68962 | 28.81696 | 28.74630 | Pt | 0 | 0 | 0.00000 |
| HETATM | 389 | Pt | 2.02059  | 14.84632 | 28.74624 | Pt | 0 | 0 | 0.00000 |
| HETATM | 390 | Pt | 2.02057  | 3.68145  | 28.74620 | Pt | 0 | 0 | 0.00000 |
| HETATM | 391 | Pt | 11.68960 | 20.42872 | 28.74621 | Pt | 0 | 0 | 0.00000 |
| HETATM | 392 | Pt | 11.68962 | 9.26391  | 28.74631 | Pt | 0 | 0 | 0.00000 |
| HETATM | 393 | Pt | 2.02217  | 17.65619 | 28.68156 | Pt | 0 | 0 | 0.00000 |
| HETATM | 394 | Pt | 2.02217  | 6.49136  | 28.68155 | Pt | 0 | 0 | 0.00000 |
| HETATM | 395 | Pt | 11.69122 | 23.23862 | 28.68155 | Pt | 0 | 0 | 0.00000 |
| HETATM | 396 | Pt | 11.69122 | 12.07379 | 28.68155 | Pt | 0 | 0 | 0.00000 |
| HETATM | 397 | Pt | 2.02218  | 20.42464 | 28.68156 | Pt | 0 | 0 | 0.00000 |
| HETATM | 398 | Pt | 2.02218  | 9.25979  | 28.68154 | Pt | 0 | 0 | 0.00000 |
| HETATM | 399 | Pt | 11.69122 | 26.00708 | 28.68155 | Pt | 0 | 0 | 0.00000 |
| HETATM | 400 | Pt | 11.69122 | 14.84221 | 28.68155 | Pt | 0 | 0 | 0.00000 |
| HETATM | 401 | Pt | 4.42521  | 13.45802 | 28.74634 | Pt | 0 | 0 | 0.00000 |
| HETATM | 402 | Pt | 4.42520  | 24.62282 | 28.74615 | Pt | 0 | 0 | 0.00000 |
| HETATM | 403 | Pt | 14.09423 | 19.04042 | 28.74625 | Pt | 0 | 0 | 0.00000 |
| HETATM | 404 | Pt | 14.09425 | 30.20528 | 28.74620 | Pt | 0 | 0 | 0.00000 |
| HETATM | 405 | Pt | 4.44785  | 16.27386 | 28.64816 | Pt | 0 | 0 | 0.00000 |
| HETATM | 406 | Pt | 4.44783  | 5.10897  | 28.64818 | Pt | 0 | 0 | 0.00000 |
| HETATM | 407 | Pt | 14.11688 | 21.85625 | 28.64819 | Pt | 0 | 0 | 0.00000 |
| HETATM | 408 | Pt | 14.11689 | 10.69142 | 28.64816 | Pt | 0 | 0 | 0.00000 |
| HETATM | 409 | Pt | 4.43725  | 19.04043 | 28.66379 | Pt | 0 | 0 | 0.00000 |
| HETATM | 410 | Pt | 4.43725  | 7.87557  | 28.66378 | Pt | 0 | 0 | 0.00000 |
| HETATM | 411 | Pt | 14.10630 | 24.62285 | 28.66378 | Pt | 0 | 0 | 0.00000 |
| HETATM | 412 | Pt | 14.10629 | 13.45800 | 28.66378 | Pt | 0 | 0 | 0.00000 |
| HETATM | 413 | Pt | 4.44786  | 21.80698 | 28.64816 | Pt | 0 | 0 | 0.00000 |
| HETATM | 414 | Pt | 4.44783  | 10.64217 | 28.64818 | Pt | 0 | 0 | 0.00000 |
| HETATM | 415 | Pt | 14.11690 | 27.38942 | 28.64818 | Pt | 0 | 0 | 0.00000 |
| HETATM | 416 | Pt | 14.11688 | 16.22459 | 28.64816 | Pt | 0 | 0 | 0.00000 |
| HETATM | 417 | Pt | 6.85785  | 14.86433 | 28.68155 | Pt | 0 | 0 | 0.00000 |
| HETATM | 418 | Pt | 6.85784  | 26.02919 | 28.68155 | Pt | 0 | 0 | 0.00000 |
| HETATM | 419 | Pt | 16.52688 | 20.44675 | 28.68155 | Pt | 0 | 0 | 0.00000 |
| HETATM | 420 | Pt | 16.52687 | 31.61160 | 28.68155 | Pt | 0 | 0 | 0.00000 |
| HETATM | 421 | Pt | 6.84908  | 17.64795 | 28.66380 | Pt | 0 | 0 | 0.00000 |
| HETATM | 422 | Pt | 6.84906  | 6.48311  | 28.66379 | Pt | 0 | 0 | 0.00000 |
| HETATM | 423 | Pt | 16.51812 | 23.23037 | 28.66378 | Pt | 0 | 0 | 0.00000 |
| HETATM | 424 | Pt | 16.51812 | 12.06554 | 28.66377 | Pt | 0 | 0 | 0.00000 |
| HETATM | 425 | Pt | 6.84907  | 20.43289 | 28.66380 | Pt | 0 | 0 | 0.00000 |
| HETATM | 426 | Pt | 6.84906  | 9.26804  | 28.66379 | Pt | 0 | 0 | 0.00000 |
| HETATM | 427 | Pt | 16.51811 | 26.01531 | 28.66378 | Pt | 0 | 0 | 0.00000 |
| HETATM | 428 | Pt | 16.51812 | 14.85046 | 28.66377 | Pt | 0 | 0 | 0.00000 |
| HETATM | 429 | Pt | 6.85784  | 23.21650 | 28.68155 | Pt | 0 | 0 | 0.00000 |
| HETATM | 430 | Pt | 6.85784  | 12.05166 | 28.68155 | Pt | 0 | 0 | 0.00000 |
| HETATM | 431 | Pt | 16.52686 | 28.79895 | 28.68156 | Pt | 0 | 0 | 0.00000 |
| HETATM | 432 | Pt | 16.52688 | 17.63409 | 28.68154 | Pt | 0 | 0 | 0.00000 |
| HETATM | 433 | Pt | 9.25537  | 16.24854 | 28.68156 | Pt | 0 | 0 | 0.00000 |
| HETATM | 434 | Pt | 9.25538  | 27.41341 | 28.68155 | Pt | 0 | 0 | 0.00000 |
| HETATM | 435 | Pt | 18.92442 | 21.83098 | 28.68154 | Pt | 0 | 0 | 0.00000 |

|                      |     |    |          |          |          |    |   |   |         |
|----------------------|-----|----|----------|----------|----------|----|---|---|---------|
| HETATM               | 436 | Pt | 18.92442 | 32.99583 | 28.68156 | Pt | 0 | 0 | 0.00000 |
| HETATM               | 437 | Pt | 9.23969  | 19.04042 | 28.64817 | Pt | 0 | 0 | 0.00000 |
| HETATM               | 438 | Pt | 9.23972  | 7.87557  | 28.64818 | Pt | 0 | 0 | 0.00000 |
| HETATM               | 439 | Pt | 18.90875 | 24.62285 | 28.64818 | Pt | 0 | 0 | 0.00000 |
| HETATM               | 440 | Pt | 18.90874 | 13.45800 | 28.64816 | Pt | 0 | 0 | 0.00000 |
| HETATM               | 441 | Pt | 9.25538  | 21.83229 | 28.68155 | Pt | 0 | 0 | 0.00000 |
| HETATM               | 442 | Pt | 9.25538  | 10.66744 | 28.68155 | Pt | 0 | 0 | 0.00000 |
| HETATM               | 443 | Pt | 18.92444 | 27.41471 | 28.68156 | Pt | 0 | 0 | 0.00000 |
| HETATM               | 444 | Pt | 18.92441 | 16.24987 | 28.68154 | Pt | 0 | 0 | 0.00000 |
| HETATM               | 445 | Pt | 9.26815  | 24.62284 | 28.66951 | Pt | 0 | 0 | 0.00000 |
| HETATM               | 446 | Pt | 9.26815  | 13.45800 | 28.66953 | Pt | 0 | 0 | 0.00000 |
| HETATM               | 447 | Pt | 18.93719 | 30.20527 | 28.66952 | Pt | 0 | 0 | 0.00000 |
| HETATM               | 448 | Pt | 18.93718 | 19.04042 | 28.66950 | Pt | 0 | 0 | 0.00000 |
| HETATM               | 449 | O  | 2.82211  | 13.45810 | 29.86522 | O  | 0 | 0 | 0.00000 |
| HETATM               | 450 | O  | 2.82209  | 2.29305  | 29.86543 | O  | 0 | 0 | 0.00000 |
| HETATM               | 451 | O  | 12.49112 | 19.04041 | 29.86527 | O  | 0 | 0 | 0.00000 |
| HETATM               | 452 | O  | 12.49123 | 7.87559  | 29.86514 | O  | 0 | 0 | 0.00000 |
| UNIT ENERGY kcal     |     |    |          |          |          |    |   |   |         |
| ENERGY -57865.757148 |     |    |          |          |          |    |   |   |         |
| END                  |     |    |          |          |          |    |   |   |         |

XTLGRF 200

DESCRP TS

REMARK Pt111\_0.06ML\_8x8x7\_30.0\_vac hcp-displacement

FIXATOMS 1 128

CRYSTX 22.32970 22.32970 43.67409 90.00000 90.00000 60.00000

FORMAT ATOM (a6,1x,i5,1x,a5,1x,a3,1x,a1,1x,a5,3f10.5,1x,a5,i3,i2,1x,f8.5)

|        |    |    |          |          |          |    |   |   |         |
|--------|----|----|----------|----------|----------|----|---|---|---------|
| HETATM | 1  | Pt | 2.01627  | 12.06224 | 14.99187 | Pt | 0 | 0 | 0.00000 |
| HETATM | 2  | Pt | 2.01627  | 23.22709 | 14.99187 | Pt | 0 | 0 | 0.00000 |
| HETATM | 3  | Pt | 11.68531 | 17.64467 | 14.99187 | Pt | 0 | 0 | 0.00000 |
| HETATM | 4  | Pt | 11.68531 | 28.80952 | 14.99187 | Pt | 0 | 0 | 0.00000 |
| HETATM | 5  | Pt | 2.01627  | 14.85345 | 14.99187 | Pt | 0 | 0 | 0.00000 |
| HETATM | 6  | Pt | 2.01627  | 3.68860  | 14.99187 | Pt | 0 | 0 | 0.00000 |
| HETATM | 7  | Pt | 11.68531 | 20.43588 | 14.99187 | Pt | 0 | 0 | 0.00000 |
| HETATM | 8  | Pt | 11.68531 | 9.27103  | 14.99187 | Pt | 0 | 0 | 0.00000 |
| HETATM | 9  | Pt | 2.01627  | 17.64466 | 14.99187 | Pt | 0 | 0 | 0.00000 |
| HETATM | 10 | Pt | 2.01627  | 6.47981  | 14.99187 | Pt | 0 | 0 | 0.00000 |
| HETATM | 11 | Pt | 11.68531 | 23.22708 | 14.99187 | Pt | 0 | 0 | 0.00000 |
| HETATM | 12 | Pt | 11.68531 | 12.06224 | 14.99187 | Pt | 0 | 0 | 0.00000 |
| HETATM | 13 | Pt | 2.01627  | 20.43588 | 14.99187 | Pt | 0 | 0 | 0.00000 |
| HETATM | 14 | Pt | 2.01627  | 9.27103  | 14.99187 | Pt | 0 | 0 | 0.00000 |
| HETATM | 15 | Pt | 11.68531 | 26.01831 | 14.99187 | Pt | 0 | 0 | 0.00000 |
| HETATM | 16 | Pt | 11.68531 | 14.85346 | 14.99187 | Pt | 0 | 0 | 0.00000 |
| HETATM | 17 | Pt | 4.43353  | 13.45785 | 14.99187 | Pt | 0 | 0 | 0.00000 |
| HETATM | 18 | Pt | 4.43353  | 24.62270 | 14.99187 | Pt | 0 | 0 | 0.00000 |
| HETATM | 19 | Pt | 14.10257 | 19.04028 | 14.99187 | Pt | 0 | 0 | 0.00000 |
| HETATM | 20 | Pt | 14.10257 | 30.20512 | 14.99187 | Pt | 0 | 0 | 0.00000 |
| HETATM | 21 | Pt | 4.43353  | 16.24906 | 14.99187 | Pt | 0 | 0 | 0.00000 |
| HETATM | 22 | Pt | 4.43353  | 5.08421  | 14.99187 | Pt | 0 | 0 | 0.00000 |
| HETATM | 23 | Pt | 14.10257 | 21.83149 | 14.99187 | Pt | 0 | 0 | 0.00000 |
| HETATM | 24 | Pt | 14.10257 | 10.66663 | 14.99187 | Pt | 0 | 0 | 0.00000 |
| HETATM | 25 | Pt | 4.43353  | 19.04027 | 14.99187 | Pt | 0 | 0 | 0.00000 |
| HETATM | 26 | Pt | 4.43353  | 7.87542  | 14.99187 | Pt | 0 | 0 | 0.00000 |
| HETATM | 27 | Pt | 14.10257 | 24.62270 | 14.99187 | Pt | 0 | 0 | 0.00000 |
| HETATM | 28 | Pt | 14.10257 | 13.45784 | 14.99187 | Pt | 0 | 0 | 0.00000 |
| HETATM | 29 | Pt | 4.43353  | 21.83148 | 14.99187 | Pt | 0 | 0 | 0.00000 |
| HETATM | 30 | Pt | 4.43353  | 10.66663 | 14.99187 | Pt | 0 | 0 | 0.00000 |
| HETATM | 31 | Pt | 14.10257 | 27.41391 | 14.99187 | Pt | 0 | 0 | 0.00000 |
| HETATM | 32 | Pt | 14.10257 | 16.24905 | 14.99187 | Pt | 0 | 0 | 0.00000 |
| HETATM | 33 | Pt | 6.85079  | 14.85345 | 14.99187 | Pt | 0 | 0 | 0.00000 |
| HETATM | 34 | Pt | 6.85079  | 26.01830 | 14.99187 | Pt | 0 | 0 | 0.00000 |
| HETATM | 35 | Pt | 16.51983 | 20.43588 | 14.99187 | Pt | 0 | 0 | 0.00000 |
| HETATM | 36 | Pt | 16.51983 | 31.60073 | 14.99187 | Pt | 0 | 0 | 0.00000 |



|        |    |    |          |          |          |    |   |   |         |
|--------|----|----|----------|----------|----------|----|---|---|---------|
| HETATM | 37 | Pt | 6.85079  | 17.64466 | 14.99187 | Pt | 0 | 0 | 0.00000 |
| HETATM | 38 | Pt | 6.85079  | 6.47981  | 14.99187 | Pt | 0 | 0 | 0.00000 |
| HETATM | 39 | Pt | 16.51983 | 23.22708 | 14.99187 | Pt | 0 | 0 | 0.00000 |
| HETATM | 40 | Pt | 16.51983 | 12.06224 | 14.99187 | Pt | 0 | 0 | 0.00000 |
| HETATM | 41 | Pt | 6.85079  | 20.43588 | 14.99187 | Pt | 0 | 0 | 0.00000 |
| HETATM | 42 | Pt | 6.85079  | 9.27103  | 14.99187 | Pt | 0 | 0 | 0.00000 |
| HETATM | 43 | Pt | 16.51983 | 26.01831 | 14.99187 | Pt | 0 | 0 | 0.00000 |
| HETATM | 44 | Pt | 16.51983 | 14.85346 | 14.99187 | Pt | 0 | 0 | 0.00000 |
| HETATM | 45 | Pt | 6.85079  | 23.22709 | 14.99187 | Pt | 0 | 0 | 0.00000 |
| HETATM | 46 | Pt | 6.85079  | 12.06224 | 14.99187 | Pt | 0 | 0 | 0.00000 |
| HETATM | 47 | Pt | 16.51983 | 28.80952 | 14.99187 | Pt | 0 | 0 | 0.00000 |
| HETATM | 48 | Pt | 16.51983 | 17.64467 | 14.99187 | Pt | 0 | 0 | 0.00000 |
| HETATM | 49 | Pt | 9.26805  | 16.24906 | 14.99187 | Pt | 0 | 0 | 0.00000 |
| HETATM | 50 | Pt | 9.26805  | 27.41391 | 14.99187 | Pt | 0 | 0 | 0.00000 |
| HETATM | 51 | Pt | 18.93709 | 21.83149 | 14.99187 | Pt | 0 | 0 | 0.00000 |
| HETATM | 52 | Pt | 18.93709 | 32.99633 | 14.99187 | Pt | 0 | 0 | 0.00000 |
| HETATM | 53 | Pt | 9.26805  | 19.04027 | 14.99187 | Pt | 0 | 0 | 0.00000 |
| HETATM | 54 | Pt | 9.26805  | 7.87542  | 14.99187 | Pt | 0 | 0 | 0.00000 |
| HETATM | 55 | Pt | 18.93709 | 24.62270 | 14.99187 | Pt | 0 | 0 | 0.00000 |
| HETATM | 56 | Pt | 18.93709 | 13.45784 | 14.99187 | Pt | 0 | 0 | 0.00000 |
| HETATM | 57 | Pt | 9.26805  | 21.83148 | 14.99187 | Pt | 0 | 0 | 0.00000 |
| HETATM | 58 | Pt | 9.26805  | 10.66663 | 14.99187 | Pt | 0 | 0 | 0.00000 |
| HETATM | 59 | Pt | 18.93709 | 27.41391 | 14.99187 | Pt | 0 | 0 | 0.00000 |
| HETATM | 60 | Pt | 18.93709 | 16.24905 | 14.99187 | Pt | 0 | 0 | 0.00000 |
| HETATM | 61 | Pt | 9.26805  | 24.62269 | 14.99187 | Pt | 0 | 0 | 0.00000 |
| HETATM | 62 | Pt | 9.26805  | 13.45784 | 14.99187 | Pt | 0 | 0 | 0.00000 |
| HETATM | 63 | Pt | 18.93709 | 30.20512 | 14.99187 | Pt | 0 | 0 | 0.00000 |
| HETATM | 64 | Pt | 18.93709 | 19.04026 | 14.99187 | Pt | 0 | 0 | 0.00000 |
| HETATM | 65 | Pt | 2.82202  | 13.45785 | 17.27089 | Pt | 0 | 0 | 0.00000 |
| HETATM | 66 | Pt | 2.82202  | 2.29300  | 17.27089 | Pt | 0 | 0 | 0.00000 |
| HETATM | 67 | Pt | 12.49106 | 19.04028 | 17.27089 | Pt | 0 | 0 | 0.00000 |
| HETATM | 68 | Pt | 12.49106 | 7.87542  | 17.27089 | Pt | 0 | 0 | 0.00000 |
| HETATM | 69 | Pt | 2.82202  | 16.24906 | 17.27089 | Pt | 0 | 0 | 0.00000 |
| HETATM | 70 | Pt | 2.82202  | 5.08421  | 17.27089 | Pt | 0 | 0 | 0.00000 |
| HETATM | 71 | Pt | 12.49106 | 21.83149 | 17.27089 | Pt | 0 | 0 | 0.00000 |
| HETATM | 72 | Pt | 12.49106 | 10.66663 | 17.27089 | Pt | 0 | 0 | 0.00000 |
| HETATM | 73 | Pt | 2.82202  | 19.04027 | 17.27089 | Pt | 0 | 0 | 0.00000 |
| HETATM | 74 | Pt | 2.82202  | 7.87542  | 17.27089 | Pt | 0 | 0 | 0.00000 |
| HETATM | 75 | Pt | 12.49106 | 24.62270 | 17.27089 | Pt | 0 | 0 | 0.00000 |
| HETATM | 76 | Pt | 12.49106 | 13.45784 | 17.27089 | Pt | 0 | 0 | 0.00000 |
| HETATM | 77 | Pt | 2.82202  | 21.83148 | 17.27089 | Pt | 0 | 0 | 0.00000 |
| HETATM | 78 | Pt | 2.82202  | 10.66663 | 17.27089 | Pt | 0 | 0 | 0.00000 |
| HETATM | 79 | Pt | 12.49106 | 27.41391 | 17.27089 | Pt | 0 | 0 | 0.00000 |
| HETATM | 80 | Pt | 12.49106 | 16.24905 | 17.27089 | Pt | 0 | 0 | 0.00000 |
| HETATM | 81 | Pt | 5.23928  | 14.85345 | 17.27089 | Pt | 0 | 0 | 0.00000 |
| HETATM | 82 | Pt | 5.23928  | 3.68860  | 17.27089 | Pt | 0 | 0 | 0.00000 |
| HETATM | 83 | Pt | 14.90832 | 20.43588 | 17.27089 | Pt | 0 | 0 | 0.00000 |
| HETATM | 84 | Pt | 14.90832 | 9.27103  | 17.27089 | Pt | 0 | 0 | 0.00000 |
| HETATM | 85 | Pt | 5.23928  | 17.64466 | 17.27089 | Pt | 0 | 0 | 0.00000 |
| HETATM | 86 | Pt | 5.23928  | 6.47981  | 17.27089 | Pt | 0 | 0 | 0.00000 |
| HETATM | 87 | Pt | 14.90832 | 23.22708 | 17.27089 | Pt | 0 | 0 | 0.00000 |
| HETATM | 88 | Pt | 14.90832 | 12.06224 | 17.27089 | Pt | 0 | 0 | 0.00000 |
| HETATM | 89 | Pt | 5.23928  | 20.43588 | 17.27089 | Pt | 0 | 0 | 0.00000 |
| HETATM | 90 | Pt | 5.23928  | 9.27103  | 17.27089 | Pt | 0 | 0 | 0.00000 |
| HETATM | 91 | Pt | 14.90832 | 26.01831 | 17.27089 | Pt | 0 | 0 | 0.00000 |
| HETATM | 92 | Pt | 14.90832 | 14.85346 | 17.27089 | Pt | 0 | 0 | 0.00000 |
| HETATM | 93 | Pt | 5.23928  | 23.22709 | 17.27089 | Pt | 0 | 0 | 0.00000 |
| HETATM | 94 | Pt | 5.23928  | 12.06224 | 17.27089 | Pt | 0 | 0 | 0.00000 |
| HETATM | 95 | Pt | 14.90832 | 28.80952 | 17.27089 | Pt | 0 | 0 | 0.00000 |
| HETATM | 96 | Pt | 14.90832 | 17.64467 | 17.27089 | Pt | 0 | 0 | 0.00000 |
| HETATM | 97 | Pt | 7.65654  | 16.24906 | 17.27089 | Pt | 0 | 0 | 0.00000 |
| HETATM | 98 | Pt | 7.65654  | 5.08421  | 17.27089 | Pt | 0 | 0 | 0.00000 |
| HETATM | 99 | Pt | 17.32558 | 21.83149 | 17.27089 | Pt | 0 | 0 | 0.00000 |

|        |     |    |          |          |          |    |   |   |         |
|--------|-----|----|----------|----------|----------|----|---|---|---------|
| HETATM | 100 | Pt | 17.32558 | 10.66663 | 17.27089 | Pt | 0 | 0 | 0.00000 |
| HETATM | 101 | Pt | 7.65654  | 19.04027 | 17.27089 | Pt | 0 | 0 | 0.00000 |
| HETATM | 102 | Pt | 7.65654  | 7.87542  | 17.27089 | Pt | 0 | 0 | 0.00000 |
| HETATM | 103 | Pt | 17.32558 | 24.62270 | 17.27089 | Pt | 0 | 0 | 0.00000 |
| HETATM | 104 | Pt | 17.32558 | 13.45784 | 17.27089 | Pt | 0 | 0 | 0.00000 |
| HETATM | 105 | Pt | 7.65654  | 21.83148 | 17.27089 | Pt | 0 | 0 | 0.00000 |
| HETATM | 106 | Pt | 7.65654  | 10.66663 | 17.27089 | Pt | 0 | 0 | 0.00000 |
| HETATM | 107 | Pt | 17.32558 | 27.41391 | 17.27089 | Pt | 0 | 0 | 0.00000 |
| HETATM | 108 | Pt | 17.32558 | 16.24905 | 17.27089 | Pt | 0 | 0 | 0.00000 |
| HETATM | 109 | Pt | 7.65654  | 24.62269 | 17.27089 | Pt | 0 | 0 | 0.00000 |
| HETATM | 110 | Pt | 7.65654  | 13.45784 | 17.27089 | Pt | 0 | 0 | 0.00000 |
| HETATM | 111 | Pt | 17.32558 | 30.20512 | 17.27089 | Pt | 0 | 0 | 0.00000 |
| HETATM | 112 | Pt | 17.32558 | 19.04026 | 17.27089 | Pt | 0 | 0 | 0.00000 |
| HETATM | 113 | Pt | 10.07381 | 17.64466 | 17.27089 | Pt | 0 | 0 | 0.00000 |
| HETATM | 114 | Pt | 10.07381 | 6.47981  | 17.27089 | Pt | 0 | 0 | 0.00000 |
| HETATM | 115 | Pt | 0.40476  | 12.06223 | 17.27089 | Pt | 0 | 0 | 0.00000 |
| HETATM | 116 | Pt | 0.40476  | 0.89739  | 17.27089 | Pt | 0 | 0 | 0.00000 |
| HETATM | 117 | Pt | 10.07381 | 20.43588 | 17.27089 | Pt | 0 | 0 | 0.00000 |
| HETATM | 118 | Pt | 10.07381 | 9.27103  | 17.27089 | Pt | 0 | 0 | 0.00000 |
| HETATM | 119 | Pt | 0.40476  | 14.85346 | 17.27089 | Pt | 0 | 0 | 0.00000 |
| HETATM | 120 | Pt | 0.40476  | 3.68861  | 17.27089 | Pt | 0 | 0 | 0.00000 |
| HETATM | 121 | Pt | 10.07381 | 23.22709 | 17.27089 | Pt | 0 | 0 | 0.00000 |
| HETATM | 122 | Pt | 10.07381 | 12.06224 | 17.27089 | Pt | 0 | 0 | 0.00000 |
| HETATM | 123 | Pt | 0.40476  | 17.64467 | 17.27089 | Pt | 0 | 0 | 0.00000 |
| HETATM | 124 | Pt | 0.40476  | 6.47982  | 17.27089 | Pt | 0 | 0 | 0.00000 |
| HETATM | 125 | Pt | 10.07381 | 26.01830 | 17.27089 | Pt | 0 | 0 | 0.00000 |
| HETATM | 126 | Pt | 10.07381 | 14.85345 | 17.27089 | Pt | 0 | 0 | 0.00000 |
| HETATM | 127 | Pt | 0.40476  | 20.43588 | 17.27089 | Pt | 0 | 0 | 0.00000 |
| HETATM | 128 | Pt | 0.40476  | 9.27103  | 17.27089 | Pt | 0 | 0 | 0.00000 |
| HETATM | 129 | Pt | 3.62747  | 14.85291 | 19.55106 | Pt | 0 | 0 | 0.00000 |
| HETATM | 130 | Pt | 3.62745  | 3.68854  | 19.55095 | Pt | 0 | 0 | 0.00000 |
| HETATM | 131 | Pt | 13.29693 | 20.43556 | 19.55096 | Pt | 0 | 0 | 0.00000 |
| HETATM | 132 | Pt | 13.29678 | 9.27095  | 19.54968 | Pt | 0 | 0 | 0.00000 |
| HETATM | 133 | Pt | 3.62774  | 17.64425 | 19.54927 | Pt | 0 | 0 | 0.00000 |
| HETATM | 134 | Pt | 3.62780  | 6.47978  | 19.54942 | Pt | 0 | 0 | 0.00000 |
| HETATM | 135 | Pt | 13.29714 | 23.22700 | 19.54954 | Pt | 0 | 0 | 0.00000 |
| HETATM | 136 | Pt | 13.29687 | 12.06235 | 19.54918 | Pt | 0 | 0 | 0.00000 |
| HETATM | 137 | Pt | 3.62794  | 20.43605 | 19.54885 | Pt | 0 | 0 | 0.00000 |
| HETATM | 138 | Pt | 3.62783  | 9.27122  | 19.54946 | Pt | 0 | 0 | 0.00000 |
| HETATM | 139 | Pt | 13.29701 | 26.01836 | 19.54922 | Pt | 0 | 0 | 0.00000 |
| HETATM | 140 | Pt | 13.29705 | 14.85363 | 19.54964 | Pt | 0 | 0 | 0.00000 |
| HETATM | 141 | Pt | 3.62745  | 23.22758 | 19.55074 | Pt | 0 | 0 | 0.00000 |
| HETATM | 142 | Pt | 3.62757  | 12.06238 | 19.55103 | Pt | 0 | 0 | 0.00000 |
| HETATM | 143 | Pt | 13.29684 | 28.80952 | 19.54959 | Pt | 0 | 0 | 0.00000 |
| HETATM | 144 | Pt | 13.29691 | 17.64480 | 19.55113 | Pt | 0 | 0 | 0.00000 |
| HETATM | 145 | Pt | 6.04470  | 16.24882 | 19.54927 | Pt | 0 | 0 | 0.00000 |
| HETATM | 146 | Pt | 6.04481  | 5.08443  | 19.54954 | Pt | 0 | 0 | 0.00000 |
| HETATM | 147 | Pt | 15.71405 | 21.83149 | 19.54942 | Pt | 0 | 0 | 0.00000 |
| HETATM | 148 | Pt | 15.71415 | 10.66673 | 19.54918 | Pt | 0 | 0 | 0.00000 |
| HETATM | 149 | Pt | 6.04499  | 19.04018 | 19.54842 | Pt | 0 | 0 | 0.00000 |
| HETATM | 150 | Pt | 6.04508  | 7.87557  | 19.54935 | Pt | 0 | 0 | 0.00000 |
| HETATM | 151 | Pt | 15.71419 | 24.62281 | 19.54935 | Pt | 0 | 0 | 0.00000 |
| HETATM | 152 | Pt | 15.71410 | 13.45788 | 19.54946 | Pt | 0 | 0 | 0.00000 |
| HETATM | 153 | Pt | 6.04476  | 21.83154 | 19.54882 | Pt | 0 | 0 | 0.00000 |
| HETATM | 154 | Pt | 6.04487  | 10.66658 | 19.54982 | Pt | 0 | 0 | 0.00000 |
| HETATM | 155 | Pt | 15.71413 | 27.41389 | 19.54953 | Pt | 0 | 0 | 0.00000 |
| HETATM | 156 | Pt | 15.71399 | 16.24897 | 19.54980 | Pt | 0 | 0 | 0.00000 |
| HETATM | 157 | Pt | 6.04420  | 24.62282 | 19.55019 | Pt | 0 | 0 | 0.00000 |
| HETATM | 158 | Pt | 6.04432  | 13.45762 | 19.55069 | Pt | 0 | 0 | 0.00000 |
| HETATM | 159 | Pt | 15.71413 | 30.20502 | 19.54958 | Pt | 0 | 0 | 0.00000 |
| HETATM | 160 | Pt | 15.71361 | 19.04021 | 19.55048 | Pt | 0 | 0 | 0.00000 |
| HETATM | 161 | Pt | 8.46237  | 17.64489 | 19.54885 | Pt | 0 | 0 | 0.00000 |
| HETATM | 162 | Pt | 8.46225  | 6.48000  | 19.54922 | Pt | 0 | 0 | 0.00000 |

|        |     |    |          |          |          |    |   |   |         |
|--------|-----|----|----------|----------|----------|----|---|---|---------|
| HETATM | 163 | Pt | 18.13148 | 23.22723 | 19.54945 | Pt | 0 | 0 | 0.00000 |
| HETATM | 164 | Pt | 18.13138 | 12.06252 | 19.54963 | Pt | 0 | 0 | 0.00000 |
| HETATM | 165 | Pt | 8.46249  | 20.43567 | 19.54881 | Pt | 0 | 0 | 0.00000 |
| HETATM | 166 | Pt | 8.46227  | 9.27106  | 19.54953 | Pt | 0 | 0 | 0.00000 |
| HETATM | 167 | Pt | 18.13139 | 26.01813 | 19.54982 | Pt | 0 | 0 | 0.00000 |
| HETATM | 168 | Pt | 18.13132 | 14.85332 | 19.54980 | Pt | 0 | 0 | 0.00000 |
| HETATM | 169 | Pt | 8.46201  | 23.22658 | 19.54889 | Pt | 0 | 0 | 0.00000 |
| HETATM | 170 | Pt | 8.46187  | 12.06212 | 19.54954 | Pt | 0 | 0 | 0.00000 |
| HETATM | 171 | Pt | 18.13146 | 28.80908 | 19.54954 | Pt | 0 | 0 | 0.00000 |
| HETATM | 172 | Pt | 18.13118 | 17.64437 | 19.54954 | Pt | 0 | 0 | 0.00000 |
| HETATM | 173 | Pt | 8.46181  | 26.01830 | 19.54889 | Pt | 0 | 0 | 0.00000 |
| HETATM | 174 | Pt | 8.46195  | 14.85381 | 19.54926 | Pt | 0 | 0 | 0.00000 |
| HETATM | 175 | Pt | 18.13166 | 31.60102 | 19.54906 | Pt | 0 | 0 | 0.00000 |
| HETATM | 176 | Pt | 18.13122 | 20.43615 | 19.54945 | Pt | 0 | 0 | 0.00000 |
| HETATM | 177 | Pt | 10.88015 | 19.04024 | 19.55075 | Pt | 0 | 0 | 0.00000 |
| HETATM | 178 | Pt | 10.87956 | 7.87544  | 19.54959 | Pt | 0 | 0 | 0.00000 |
| HETATM | 179 | Pt | 1.21075  | 13.45773 | 19.55103 | Pt | 0 | 0 | 0.00000 |
| HETATM | 180 | Pt | 1.21059  | 2.29314  | 19.55113 | Pt | 0 | 0 | 0.00000 |
| HETATM | 181 | Pt | 10.88009 | 21.83082 | 19.55020 | Pt | 0 | 0 | 0.00000 |
| HETATM | 182 | Pt | 10.87945 | 10.66662 | 19.54958 | Pt | 0 | 0 | 0.00000 |
| HETATM | 183 | Pt | 1.21069  | 16.24833 | 19.55069 | Pt | 0 | 0 | 0.00000 |
| HETATM | 184 | Pt | 1.21071  | 5.08377  | 19.55048 | Pt | 0 | 0 | 0.00000 |
| HETATM | 185 | Pt | 10.87980 | 24.62227 | 19.54890 | Pt | 0 | 0 | 0.00000 |
| HETATM | 186 | Pt | 10.87966 | 13.45827 | 19.54907 | Pt | 0 | 0 | 0.00000 |
| HETATM | 187 | Pt | 1.21101  | 19.04014 | 19.54926 | Pt | 0 | 0 | 0.00000 |
| HETATM | 188 | Pt | 1.21082  | 7.87545  | 19.54945 | Pt | 0 | 0 | 0.00000 |
| HETATM | 189 | Pt | 10.87954 | 27.41388 | 19.54914 | Pt | 0 | 0 | 0.00000 |
| HETATM | 190 | Pt | 10.87995 | 16.24976 | 19.55015 | Pt | 0 | 0 | 0.00000 |
| HETATM | 191 | Pt | 1.21093  | 21.83217 | 19.55014 | Pt | 0 | 0 | 0.00000 |
| HETATM | 192 | Pt | 1.21080  | 10.66713 | 19.55040 | Pt | 0 | 0 | 0.00000 |
| HETATM | 193 | Pt | 2.01683  | 12.06320 | 21.83248 | Pt | 0 | 0 | 0.00000 |
| HETATM | 194 | Pt | 2.01666  | 23.22851 | 21.83231 | Pt | 0 | 0 | 0.00000 |
| HETATM | 195 | Pt | 11.68635 | 17.64571 | 21.83232 | Pt | 0 | 0 | 0.00000 |
| HETATM | 196 | Pt | 11.68540 | 28.80965 | 21.82815 | Pt | 0 | 0 | 0.00000 |
| HETATM | 197 | Pt | 2.01657  | 14.85201 | 21.83278 | Pt | 0 | 0 | 0.00000 |
| HETATM | 198 | Pt | 2.01659  | 3.68770  | 21.83254 | Pt | 0 | 0 | 0.00000 |
| HETATM | 199 | Pt | 11.68641 | 20.43472 | 21.83215 | Pt | 0 | 0 | 0.00000 |
| HETATM | 200 | Pt | 11.68527 | 9.27065  | 21.82874 | Pt | 0 | 0 | 0.00000 |
| HETATM | 201 | Pt | 2.01662  | 17.64366 | 21.82834 | Pt | 0 | 0 | 0.00000 |
| HETATM | 202 | Pt | 2.01677  | 6.47919  | 21.82836 | Pt | 0 | 0 | 0.00000 |
| HETATM | 203 | Pt | 11.68625 | 23.22624 | 21.82804 | Pt | 0 | 0 | 0.00000 |
| HETATM | 204 | Pt | 11.68534 | 12.06244 | 21.82708 | Pt | 0 | 0 | 0.00000 |
| HETATM | 205 | Pt | 2.01733  | 20.43668 | 21.82722 | Pt | 0 | 0 | 0.00000 |
| HETATM | 206 | Pt | 2.01683  | 9.27177  | 21.82834 | Pt | 0 | 0 | 0.00000 |
| HETATM | 207 | Pt | 11.68553 | 26.01821 | 21.82676 | Pt | 0 | 0 | 0.00000 |
| HETATM | 208 | Pt | 11.68602 | 14.85459 | 21.82788 | Pt | 0 | 0 | 0.00000 |
| HETATM | 209 | Pt | 4.43213  | 13.45738 | 21.83278 | Pt | 0 | 0 | 0.00000 |
| HETATM | 210 | Pt | 4.43198  | 24.62307 | 21.83216 | Pt | 0 | 0 | 0.00000 |
| HETATM | 211 | Pt | 14.10163 | 19.04010 | 21.83254 | Pt | 0 | 0 | 0.00000 |
| HETATM | 212 | Pt | 14.10228 | 30.20490 | 21.82874 | Pt | 0 | 0 | 0.00000 |
| HETATM | 213 | Pt | 4.43324  | 16.24855 | 21.82860 | Pt | 0 | 0 | 0.00000 |
| HETATM | 214 | Pt | 4.43344  | 5.08453  | 21.82881 | Pt | 0 | 0 | 0.00000 |
| HETATM | 215 | Pt | 14.10290 | 21.83156 | 21.82881 | Pt | 0 | 0 | 0.00000 |
| HETATM | 216 | Pt | 14.10268 | 10.66683 | 21.82746 | Pt | 0 | 0 | 0.00000 |
| HETATM | 217 | Pt | 4.43361  | 19.04013 | 21.82619 | Pt | 0 | 0 | 0.00000 |
| HETATM | 218 | Pt | 4.43359  | 7.87558  | 21.82737 | Pt | 0 | 0 | 0.00000 |
| HETATM | 219 | Pt | 14.10290 | 24.62321 | 21.82787 | Pt | 0 | 0 | 0.00000 |
| HETATM | 220 | Pt | 14.10278 | 13.45768 | 21.82809 | Pt | 0 | 0 | 0.00000 |
| HETATM | 221 | Pt | 4.43351  | 21.83179 | 21.82774 | Pt | 0 | 0 | 0.00000 |
| HETATM | 222 | Pt | 4.43350  | 10.66652 | 21.82907 | Pt | 0 | 0 | 0.00000 |
| HETATM | 223 | Pt | 14.10274 | 27.41407 | 21.82823 | Pt | 0 | 0 | 0.00000 |
| HETATM | 224 | Pt | 14.10287 | 16.24868 | 21.82965 | Pt | 0 | 0 | 0.00000 |
| HETATM | 225 | Pt | 6.84975  | 14.85325 | 21.82834 | Pt | 0 | 0 | 0.00000 |

|        |     |    |          |          |          |    |   |   |         |
|--------|-----|----|----------|----------|----------|----|---|---|---------|
| HETATM | 226 | Pt | 6.84959  | 26.01869 | 21.82804 | Pt | 0 | 0 | 0.00000 |
| HETATM | 227 | Pt | 16.51905 | 20.43599 | 21.82836 | Pt | 0 | 0 | 0.00000 |
| HETATM | 228 | Pt | 16.51999 | 31.60084 | 21.82708 | Pt | 0 | 0 | 0.00000 |
| HETATM | 229 | Pt | 6.85064  | 17.64466 | 21.82618 | Pt | 0 | 0 | 0.00000 |
| HETATM | 230 | Pt | 6.85108  | 6.48036  | 21.82787 | Pt | 0 | 0 | 0.00000 |
| HETATM | 231 | Pt | 16.51995 | 23.22721 | 21.82737 | Pt | 0 | 0 | 0.00000 |
| HETATM | 232 | Pt | 16.51960 | 12.06234 | 21.82809 | Pt | 0 | 0 | 0.00000 |
| HETATM | 233 | Pt | 6.85079  | 20.43587 | 21.82586 | Pt | 0 | 0 | 0.00000 |
| HETATM | 234 | Pt | 6.85109  | 9.27098  | 21.82839 | Pt | 0 | 0 | 0.00000 |
| HETATM | 235 | Pt | 16.51965 | 26.01854 | 21.82839 | Pt | 0 | 0 | 0.00000 |
| HETATM | 236 | Pt | 16.51970 | 14.85321 | 21.82847 | Pt | 0 | 0 | 0.00000 |
| HETATM | 237 | Pt | 6.84964  | 23.22697 | 21.82731 | Pt | 0 | 0 | 0.00000 |
| HETATM | 238 | Pt | 6.84989  | 12.06165 | 21.82935 | Pt | 0 | 0 | 0.00000 |
| HETATM | 239 | Pt | 16.51950 | 28.80931 | 21.82842 | Pt | 0 | 0 | 0.00000 |
| HETATM | 240 | Pt | 16.51901 | 17.64442 | 21.82866 | Pt | 0 | 0 | 0.00000 |
| HETATM | 241 | Pt | 9.26822  | 16.25038 | 21.82722 | Pt | 0 | 0 | 0.00000 |
| HETATM | 242 | Pt | 9.26787  | 27.41405 | 21.82675 | Pt | 0 | 0 | 0.00000 |
| HETATM | 243 | Pt | 18.93746 | 21.83233 | 21.82834 | Pt | 0 | 0 | 0.00000 |
| HETATM | 244 | Pt | 18.93773 | 32.99751 | 21.82788 | Pt | 0 | 0 | 0.00000 |
| HETATM | 245 | Pt | 9.26833  | 19.04040 | 21.82774 | Pt | 0 | 0 | 0.00000 |
| HETATM | 246 | Pt | 9.26812  | 7.87564  | 21.82822 | Pt | 0 | 0 | 0.00000 |
| HETATM | 247 | Pt | 18.93701 | 24.62261 | 21.82907 | Pt | 0 | 0 | 0.00000 |
| HETATM | 248 | Pt | 18.93662 | 13.45792 | 21.82965 | Pt | 0 | 0 | 0.00000 |
| HETATM | 249 | Pt | 9.26853  | 21.83043 | 21.82731 | Pt | 0 | 0 | 0.00000 |
| HETATM | 250 | Pt | 9.26805  | 10.66624 | 21.82842 | Pt | 0 | 0 | 0.00000 |
| HETATM | 251 | Pt | 18.93704 | 27.41283 | 21.82935 | Pt | 0 | 0 | 0.00000 |
| HETATM | 252 | Pt | 18.93730 | 16.24821 | 21.82865 | Pt | 0 | 0 | 0.00000 |
| HETATM | 253 | Pt | 9.26778  | 24.62222 | 21.82481 | Pt | 0 | 0 | 0.00000 |
| HETATM | 254 | Pt | 9.26786  | 13.45794 | 21.82577 | Pt | 0 | 0 | 0.00000 |
| HETATM | 255 | Pt | 18.93728 | 30.20500 | 21.82577 | Pt | 0 | 0 | 0.00000 |
| HETATM | 256 | Pt | 18.93709 | 19.04027 | 21.82600 | Pt | 0 | 0 | 0.00000 |
| HETATM | 257 | Pt | 2.82178  | 13.45742 | 24.12224 | Pt | 0 | 0 | 0.00000 |
| HETATM | 258 | Pt | 2.82180  | 2.29336  | 24.12168 | Pt | 0 | 0 | 0.00000 |
| HETATM | 259 | Pt | 12.49150 | 19.04026 | 24.12168 | Pt | 0 | 0 | 0.00000 |
| HETATM | 260 | Pt | 12.49085 | 7.87504  | 24.10973 | Pt | 0 | 0 | 0.00000 |
| HETATM | 261 | Pt | 2.82340  | 16.24654 | 24.11006 | Pt | 0 | 0 | 0.00000 |
| HETATM | 262 | Pt | 2.82383  | 5.08231  | 24.11006 | Pt | 0 | 0 | 0.00000 |
| HETATM | 263 | Pt | 12.49342 | 21.82966 | 24.10983 | Pt | 0 | 0 | 0.00000 |
| HETATM | 264 | Pt | 12.49172 | 10.66587 | 24.10533 | Pt | 0 | 0 | 0.00000 |
| HETATM | 265 | Pt | 2.82143  | 19.04010 | 24.10388 | Pt | 0 | 0 | 0.00000 |
| HETATM | 266 | Pt | 2.82093  | 7.87549  | 24.10523 | Pt | 0 | 0 | 0.00000 |
| HETATM | 267 | Pt | 12.49044 | 24.62316 | 24.10524 | Pt | 0 | 0 | 0.00000 |
| HETATM | 268 | Pt | 12.49003 | 13.45825 | 24.10475 | Pt | 0 | 0 | 0.00000 |
| HETATM | 269 | Pt | 2.82447  | 21.83401 | 24.10878 | Pt | 0 | 0 | 0.00000 |
| HETATM | 270 | Pt | 2.82395  | 10.66861 | 24.11015 | Pt | 0 | 0 | 0.00000 |
| HETATM | 271 | Pt | 12.49150 | 27.41445 | 24.10584 | Pt | 0 | 0 | 0.00000 |
| HETATM | 272 | Pt | 12.49329 | 16.25080 | 24.11062 | Pt | 0 | 0 | 0.00000 |
| HETATM | 273 | Pt | 5.23642  | 14.85338 | 24.11006 | Pt | 0 | 0 | 0.00000 |
| HETATM | 274 | Pt | 5.23653  | 3.68972  | 24.10983 | Pt | 0 | 0 | 0.00000 |
| HETATM | 275 | Pt | 14.90579 | 20.43649 | 24.11006 | Pt | 0 | 0 | 0.00000 |
| HETATM | 276 | Pt | 14.90738 | 9.27120  | 24.10532 | Pt | 0 | 0 | 0.00000 |
| HETATM | 277 | Pt | 5.23948  | 17.64500 | 24.10399 | Pt | 0 | 0 | 0.00000 |
| HETATM | 278 | Pt | 5.24001  | 6.48089  | 24.10557 | Pt | 0 | 0 | 0.00000 |
| HETATM | 279 | Pt | 14.90890 | 23.22825 | 24.10557 | Pt | 0 | 0 | 0.00000 |
| HETATM | 280 | Pt | 14.90813 | 12.06190 | 24.10760 | Pt | 0 | 0 | 0.00000 |
| HETATM | 281 | Pt | 5.23983  | 20.43557 | 24.10343 | Pt | 0 | 0 | 0.00000 |
| HETATM | 282 | Pt | 5.23994  | 9.27034  | 24.10595 | Pt | 0 | 0 | 0.00000 |
| HETATM | 283 | Pt | 14.90833 | 26.01952 | 24.10785 | Pt | 0 | 0 | 0.00000 |
| HETATM | 284 | Pt | 14.90881 | 14.85170 | 24.10814 | Pt | 0 | 0 | 0.00000 |
| HETATM | 285 | Pt | 5.23650  | 23.22692 | 24.10893 | Pt | 0 | 0 | 0.00000 |
| HETATM | 286 | Pt | 5.23688  | 12.06086 | 24.11096 | Pt | 0 | 0 | 0.00000 |
| HETATM | 287 | Pt | 14.90673 | 28.80961 | 24.10895 | Pt | 0 | 0 | 0.00000 |
| HETATM | 288 | Pt | 14.90580 | 17.64362 | 24.11061 | Pt | 0 | 0 | 0.00000 |

|        |     |    |          |          |          |    |   |   |         |
|--------|-----|----|----------|----------|----------|----|---|---|---------|
| HETATM | 289 | Pt | 7.65671  | 16.24845 | 24.10388 | Pt | 0 | 0 | 0.00000 |
| HETATM | 290 | Pt | 7.65728  | 5.08389  | 24.10525 | Pt | 0 | 0 | 0.00000 |
| HETATM | 291 | Pt | 17.32620 | 21.83057 | 24.10523 | Pt | 0 | 0 | 0.00000 |
| HETATM | 292 | Pt | 17.32646 | 10.66593 | 24.10476 | Pt | 0 | 0 | 0.00000 |
| HETATM | 293 | Pt | 7.65601  | 19.04057 | 24.10343 | Pt | 0 | 0 | 0.00000 |
| HETATM | 294 | Pt | 7.65761  | 7.87603  | 24.10785 | Pt | 0 | 0 | 0.00000 |
| HETATM | 295 | Pt | 17.32467 | 24.62292 | 24.10595 | Pt | 0 | 0 | 0.00000 |
| HETATM | 296 | Pt | 17.32383 | 13.45738 | 24.10814 | Pt | 0 | 0 | 0.00000 |
| HETATM | 297 | Pt | 7.65712  | 21.83247 | 24.10344 | Pt | 0 | 0 | 0.00000 |
| HETATM | 298 | Pt | 7.65804  | 10.66640 | 24.10814 | Pt | 0 | 0 | 0.00000 |
| HETATM | 299 | Pt | 17.32464 | 27.41509 | 24.10813 | Pt | 0 | 0 | 0.00000 |
| HETATM | 300 | Pt | 17.32605 | 16.24986 | 24.10603 | Pt | 0 | 0 | 0.00000 |
| HETATM | 301 | Pt | 7.65761  | 24.62256 | 24.10208 | Pt | 0 | 0 | 0.00000 |
| HETATM | 302 | Pt | 7.65833  | 13.45715 | 24.10410 | Pt | 0 | 0 | 0.00000 |
| HETATM | 303 | Pt | 17.32607 | 30.20511 | 24.10431 | Pt | 0 | 0 | 0.00000 |
| HETATM | 304 | Pt | 17.32692 | 19.04022 | 24.10382 | Pt | 0 | 0 | 0.00000 |
| HETATM | 305 | Pt | 10.07478 | 17.64804 | 24.10878 | Pt | 0 | 0 | 0.00000 |
| HETATM | 306 | Pt | 10.07405 | 6.48045  | 24.10584 | Pt | 0 | 0 | 0.00000 |
| HETATM | 307 | Pt | 0.40552  | 12.06489 | 24.11015 | Pt | 0 | 0 | 0.00000 |
| HETATM | 308 | Pt | 0.40517  | 0.90017  | 24.11062 | Pt | 0 | 0 | 0.00000 |
| HETATM | 309 | Pt | 10.07506 | 20.43338 | 24.10893 | Pt | 0 | 0 | 0.00000 |
| HETATM | 310 | Pt | 10.07468 | 9.26968  | 24.10895 | Pt | 0 | 0 | 0.00000 |
| HETATM | 311 | Pt | 0.40477  | 14.85067 | 24.11095 | Pt | 0 | 0 | 0.00000 |
| HETATM | 312 | Pt | 0.40513  | 3.68588  | 24.11061 | Pt | 0 | 0 | 0.00000 |
| HETATM | 313 | Pt | 10.07317 | 23.22794 | 24.10208 | Pt | 0 | 0 | 0.00000 |
| HETATM | 314 | Pt | 10.07356 | 12.06271 | 24.10432 | Pt | 0 | 0 | 0.00000 |
| HETATM | 315 | Pt | 0.40328  | 17.64585 | 24.10410 | Pt | 0 | 0 | 0.00000 |
| HETATM | 316 | Pt | 0.40406  | 6.48094  | 24.10382 | Pt | 0 | 0 | 0.00000 |
| HETATM | 317 | Pt | 10.07287 | 26.01667 | 24.10200 | Pt | 0 | 0 | 0.00000 |
| HETATM | 318 | Pt | 10.07243 | 14.85360 | 24.10127 | Pt | 0 | 0 | 0.00000 |
| HETATM | 319 | Pt | 0.40557  | 20.43475 | 24.10127 | Pt | 0 | 0 | 0.00000 |
| HETATM | 320 | Pt | 0.40410  | 9.26987  | 24.10366 | Pt | 0 | 0 | 0.00000 |
| HETATM | 321 | Pt | 3.62632  | 14.85092 | 26.41107 | Pt | 0 | 0 | 0.00000 |
| HETATM | 322 | Pt | 3.62709  | 3.68718  | 26.41086 | Pt | 0 | 0 | 0.00000 |
| HETATM | 323 | Pt | 13.29594 | 20.43456 | 26.41085 | Pt | 0 | 0 | 0.00000 |
| HETATM | 324 | Pt | 13.29574 | 9.26916  | 26.39164 | Pt | 0 | 0 | 0.00000 |
| HETATM | 325 | Pt | 3.62638  | 17.64676 | 26.38039 | Pt | 0 | 0 | 0.00000 |
| HETATM | 326 | Pt | 3.62657  | 6.48256  | 26.38157 | Pt | 0 | 0 | 0.00000 |
| HETATM | 327 | Pt | 13.29484 | 23.23117 | 26.38148 | Pt | 0 | 0 | 0.00000 |
| HETATM | 328 | Pt | 13.29323 | 12.06197 | 26.38391 | Pt | 0 | 0 | 0.00000 |
| HETATM | 329 | Pt | 3.62721  | 20.43364 | 26.37963 | Pt | 0 | 0 | 0.00000 |
| HETATM | 330 | Pt | 3.62661  | 9.26840  | 26.38177 | Pt | 0 | 0 | 0.00000 |
| HETATM | 331 | Pt | 13.29479 | 26.01918 | 26.38455 | Pt | 0 | 0 | 0.00000 |
| HETATM | 332 | Pt | 13.29417 | 14.84931 | 26.38433 | Pt | 0 | 0 | 0.00000 |
| HETATM | 333 | Pt | 3.62743  | 23.22975 | 26.41012 | Pt | 0 | 0 | 0.00000 |
| HETATM | 334 | Pt | 3.62716  | 12.06353 | 26.41157 | Pt | 0 | 0 | 0.00000 |
| HETATM | 335 | Pt | 13.28994 | 28.81042 | 26.39457 | Pt | 0 | 0 | 0.00000 |
| HETATM | 336 | Pt | 13.29564 | 17.64671 | 26.41113 | Pt | 0 | 0 | 0.00000 |
| HETATM | 337 | Pt | 6.04756  | 16.24889 | 26.38039 | Pt | 0 | 0 | 0.00000 |
| HETATM | 338 | Pt | 6.04957  | 5.08453  | 26.38148 | Pt | 0 | 0 | 0.00000 |
| HETATM | 339 | Pt | 15.71706 | 21.83180 | 26.38157 | Pt | 0 | 0 | 0.00000 |
| HETATM | 340 | Pt | 15.71568 | 10.66340 | 26.38391 | Pt | 0 | 0 | 0.00000 |
| HETATM | 341 | Pt | 6.04525  | 19.04062 | 26.38146 | Pt | 0 | 0 | 0.00000 |
| HETATM | 342 | Pt | 6.04690  | 7.87561  | 26.38490 | Pt | 0 | 0 | 0.00000 |
| HETATM | 343 | Pt | 15.71333 | 24.62440 | 26.38490 | Pt | 0 | 0 | 0.00000 |
| HETATM | 344 | Pt | 15.71208 | 13.45442 | 26.39185 | Pt | 0 | 0 | 0.00000 |
| HETATM | 345 | Pt | 6.04842  | 21.83218 | 26.37964 | Pt | 0 | 0 | 0.00000 |
| HETATM | 346 | Pt | 6.05068  | 10.66548 | 26.38345 | Pt | 0 | 0 | 0.00000 |
| HETATM | 347 | Pt | 15.71166 | 27.41824 | 26.39090 | Pt | 0 | 0 | 0.00000 |
| HETATM | 348 | Pt | 15.71692 | 16.24823 | 26.38307 | Pt | 0 | 0 | 0.00000 |
| HETATM | 349 | Pt | 6.05672  | 24.62304 | 26.37249 | Pt | 0 | 0 | 0.00000 |
| HETATM | 350 | Pt | 6.05702  | 13.45704 | 26.37382 | Pt | 0 | 0 | 0.00000 |
| HETATM | 351 | Pt | 15.72152 | 30.20904 | 26.37592 | Pt | 0 | 0 | 0.00000 |

|        |     |    |          |          |          |    |   |   |         |
|--------|-----|----|----------|----------|----------|----|---|---|---------|
| HETATM | 352 | Pt | 15.72540 | 19.04017 | 26.37383 | Pt | 0 | 0 | 0.00000 |
| HETATM | 353 | Pt | 8.46064  | 17.64305 | 26.37963 | Pt | 0 | 0 | 0.00000 |
| HETATM | 354 | Pt | 8.46408  | 6.47856  | 26.38455 | Pt | 0 | 0 | 0.00000 |
| HETATM | 355 | Pt | 18.12966 | 23.22476 | 26.38177 | Pt | 0 | 0 | 0.00000 |
| HETATM | 356 | Pt | 18.12909 | 12.05787 | 26.38433 | Pt | 0 | 0 | 0.00000 |
| HETATM | 357 | Pt | 8.46122  | 20.43915 | 26.37963 | Pt | 0 | 0 | 0.00000 |
| HETATM | 358 | Pt | 8.46735  | 9.27117  | 26.39090 | Pt | 0 | 0 | 0.00000 |
| HETATM | 359 | Pt | 18.12753 | 26.02260 | 26.38345 | Pt | 0 | 0 | 0.00000 |
| HETATM | 360 | Pt | 18.12921 | 14.85549 | 26.38307 | Pt | 0 | 0 | 0.00000 |
| HETATM | 361 | Pt | 8.46215  | 23.22682 | 26.38608 | Pt | 0 | 0 | 0.00000 |
| HETATM | 362 | Pt | 8.46479  | 12.06140 | 26.38946 | Pt | 0 | 0 | 0.00000 |
| HETATM | 363 | Pt | 18.12937 | 28.81127 | 26.38946 | Pt | 0 | 0 | 0.00000 |
| HETATM | 364 | Pt | 18.13141 | 17.64477 | 26.38847 | Pt | 0 | 0 | 0.00000 |
| HETATM | 365 | Pt | 8.46255  | 26.01714 | 26.38484 | Pt | 0 | 0 | 0.00000 |
| HETATM | 366 | Pt | 8.46089  | 14.85496 | 26.38641 | Pt | 0 | 0 | 0.00000 |
| HETATM | 367 | Pt | 18.13671 | 31.59945 | 26.38168 | Pt | 0 | 0 | 0.00000 |
| HETATM | 368 | Pt | 18.13142 | 20.43574 | 26.38817 | Pt | 0 | 0 | 0.00000 |
| HETATM | 369 | Pt | 10.88204 | 19.04130 | 26.41013 | Pt | 0 | 0 | 0.00000 |
| HETATM | 370 | Pt | 10.88374 | 7.86989  | 26.39458 | Pt | 0 | 0 | 0.00000 |
| HETATM | 371 | Pt | 1.21194  | 13.45795 | 26.41156 | Pt | 0 | 0 | 0.00000 |
| HETATM | 372 | Pt | 1.21288  | 2.29299  | 26.41113 | Pt | 0 | 0 | 0.00000 |
| HETATM | 373 | Pt | 10.87403 | 21.84177 | 26.37249 | Pt | 0 | 0 | 0.00000 |
| HETATM | 374 | Pt | 10.87923 | 10.67503 | 26.37592 | Pt | 0 | 0 | 0.00000 |
| HETATM | 375 | Pt | 1.20384  | 16.25904 | 26.37381 | Pt | 0 | 0 | 0.00000 |
| HETATM | 376 | Pt | 1.20476  | 5.09395  | 26.37383 | Pt | 0 | 0 | 0.00000 |
| HETATM | 377 | Pt | 10.87844 | 24.62232 | 26.38484 | Pt | 0 | 0 | 0.00000 |
| HETATM | 378 | Pt | 10.87589 | 13.46184 | 26.38167 | Pt | 0 | 0 | 0.00000 |
| HETATM | 379 | Pt | 1.21252  | 19.03979 | 26.38641 | Pt | 0 | 0 | 0.00000 |
| HETATM | 380 | Pt | 1.21036  | 7.87542  | 26.38817 | Pt | 0 | 0 | 0.00000 |
| HETATM | 381 | Pt | 10.87513 | 27.40619 | 26.37676 | Pt | 0 | 0 | 0.00000 |
| HETATM | 382 | Pt | 10.87301 | 16.24114 | 26.37207 | Pt | 0 | 0 | 0.00000 |
| HETATM | 383 | Pt | 1.20692  | 21.82185 | 26.37205 | Pt | 0 | 0 | 0.00000 |
| HETATM | 384 | Pt | 1.20482  | 10.65677 | 26.37351 | Pt | 0 | 0 | 0.00000 |
| HETATM | 385 | Pt | 2.02017  | 12.06899 | 28.74603 | Pt | 0 | 0 | 0.00000 |
| HETATM | 386 | Pt | 2.02306  | 23.23500 | 28.74560 | Pt | 0 | 0 | 0.00000 |
| HETATM | 387 | Pt | 11.68877 | 17.65450 | 28.74563 | Pt | 0 | 0 | 0.00000 |
| HETATM | 388 | Pt | 11.66994 | 28.78288 | 28.67648 | Pt | 0 | 0 | 0.00000 |
| HETATM | 389 | Pt | 2.02030  | 14.84543 | 28.74634 | Pt | 0 | 0 | 0.00000 |
| HETATM | 390 | Pt | 2.02192  | 3.68209  | 28.74638 | Pt | 0 | 0 | 0.00000 |
| HETATM | 391 | Pt | 11.68961 | 20.43045 | 28.74549 | Pt | 0 | 0 | 0.00000 |
| HETATM | 392 | Pt | 11.67410 | 9.26289  | 28.72066 | Pt | 0 | 0 | 0.00000 |
| HETATM | 393 | Pt | 2.02461  | 17.65498 | 28.68141 | Pt | 0 | 0 | 0.00000 |
| HETATM | 394 | Pt | 2.02322  | 6.49164  | 28.68196 | Pt | 0 | 0 | 0.00000 |
| HETATM | 395 | Pt | 11.69006 | 23.24018 | 28.68080 | Pt | 0 | 0 | 0.00000 |
| HETATM | 396 | Pt | 11.67643 | 12.07483 | 28.65820 | Pt | 0 | 0 | 0.00000 |
| HETATM | 397 | Pt | 2.02601  | 20.42441 | 28.68040 | Pt | 0 | 0 | 0.00000 |
| HETATM | 398 | Pt | 2.02302  | 9.25965  | 28.68196 | Pt | 0 | 0 | 0.00000 |
| HETATM | 399 | Pt | 11.68236 | 26.01082 | 28.67003 | Pt | 0 | 0 | 0.00000 |
| HETATM | 400 | Pt | 11.68660 | 14.84615 | 28.68045 | Pt | 0 | 0 | 0.00000 |
| HETATM | 401 | Pt | 4.42457  | 13.45732 | 28.74638 | Pt | 0 | 0 | 0.00000 |
| HETATM | 402 | Pt | 4.42670  | 24.62371 | 28.74548 | Pt | 0 | 0 | 0.00000 |
| HETATM | 403 | Pt | 14.09411 | 19.04190 | 28.74638 | Pt | 0 | 0 | 0.00000 |
| HETATM | 404 | Pt | 14.10115 | 30.19130 | 28.72062 | Pt | 0 | 0 | 0.00000 |
| HETATM | 405 | Pt | 4.44763  | 16.27347 | 28.64811 | Pt | 0 | 0 | 0.00000 |
| HETATM | 406 | Pt | 4.44973  | 5.10937  | 28.64848 | Pt | 0 | 0 | 0.00000 |
| HETATM | 407 | Pt | 14.11627 | 21.85809 | 28.64848 | Pt | 0 | 0 | 0.00000 |
| HETATM | 408 | Pt | 14.11582 | 10.68955 | 28.70219 | Pt | 0 | 0 | 0.00000 |
| HETATM | 409 | Pt | 4.43833  | 19.04031 | 28.66300 | Pt | 0 | 0 | 0.00000 |
| HETATM | 410 | Pt | 4.43988  | 7.87531  | 28.66509 | Pt | 0 | 0 | 0.00000 |
| HETATM | 411 | Pt | 14.10290 | 24.62570 | 28.66584 | Pt | 0 | 0 | 0.00000 |
| HETATM | 412 | Pt | 14.09966 | 13.46313 | 28.67832 | Pt | 0 | 0 | 0.00000 |
| HETATM | 413 | Pt | 4.44901  | 21.80730 | 28.64714 | Pt | 0 | 0 | 0.00000 |
| HETATM | 414 | Pt | 4.44977  | 10.64083 | 28.64933 | Pt | 0 | 0 | 0.00000 |

|        |     |    |          |          |          |    |   |   |         |
|--------|-----|----|----------|----------|----------|----|---|---|---------|
| HETATM | 415 | Pt | 14.09944 | 27.39667 | 28.67542 | Pt | 0 | 0 | 0.00000 |
| HETATM | 416 | Pt | 14.11603 | 16.22718 | 28.64964 | Pt | 0 | 0 | 0.00000 |
| HETATM | 417 | Pt | 6.85556  | 14.86583 | 28.68141 | Pt | 0 | 0 | 0.00000 |
| HETATM | 418 | Pt | 6.85980  | 26.02896 | 28.68080 | Pt | 0 | 0 | 0.00000 |
| HETATM | 419 | Pt | 16.52661 | 20.44780 | 28.68197 | Pt | 0 | 0 | 0.00000 |
| HETATM | 420 | Pt | 16.53516 | 31.59931 | 28.65821 | Pt | 0 | 0 | 0.00000 |
| HETATM | 421 | Pt | 6.84843  | 17.64883 | 28.66300 | Pt | 0 | 0 | 0.00000 |
| HETATM | 422 | Pt | 6.85327  | 6.48157  | 28.66584 | Pt | 0 | 0 | 0.00000 |
| HETATM | 423 | Pt | 16.51657 | 23.23253 | 28.66509 | Pt | 0 | 0 | 0.00000 |
| HETATM | 424 | Pt | 16.52585 | 12.06236 | 28.67831 | Pt | 0 | 0 | 0.00000 |
| HETATM | 425 | Pt | 6.84922  | 20.43314 | 28.66277 | Pt | 0 | 0 | 0.00000 |
| HETATM | 426 | Pt | 6.85530  | 9.26585  | 28.66838 | Pt | 0 | 0 | 0.00000 |
| HETATM | 427 | Pt | 16.51318 | 26.01960 | 28.66838 | Pt | 0 | 0 | 0.00000 |
| HETATM | 428 | Pt | 16.51751 | 14.84942 | 28.66807 | Pt | 0 | 0 | 0.00000 |
| HETATM | 429 | Pt | 6.85761  | 23.21611 | 28.68055 | Pt | 0 | 0 | 0.00000 |
| HETATM | 430 | Pt | 6.85679  | 12.05208 | 28.68290 | Pt | 0 | 0 | 0.00000 |
| HETATM | 431 | Pt | 16.53641 | 28.80274 | 28.68868 | Pt | 0 | 0 | 0.00000 |
| HETATM | 432 | Pt | 16.52699 | 17.63433 | 28.68246 | Pt | 0 | 0 | 0.00000 |
| HETATM | 433 | Pt | 9.25324  | 16.25178 | 28.68040 | Pt | 0 | 0 | 0.00000 |
| HETATM | 434 | Pt | 9.26304  | 27.40760 | 28.67003 | Pt | 0 | 0 | 0.00000 |
| HETATM | 435 | Pt | 18.92388 | 21.83164 | 28.68196 | Pt | 0 | 0 | 0.00000 |
| HETATM | 436 | Pt | 18.93011 | 32.99391 | 28.68046 | Pt | 0 | 0 | 0.00000 |
| HETATM | 437 | Pt | 9.23938  | 19.04158 | 28.64715 | Pt | 0 | 0 | 0.00000 |
| HETATM | 438 | Pt | 9.25470  | 7.86407  | 28.67541 | Pt | 0 | 0 | 0.00000 |
| HETATM | 439 | Pt | 18.90663 | 24.62386 | 28.64933 | Pt | 0 | 0 | 0.00000 |
| HETATM | 440 | Pt | 18.91142 | 13.45856 | 28.64964 | Pt | 0 | 0 | 0.00000 |
| HETATM | 441 | Pt | 9.25515  | 21.83190 | 28.68055 | Pt | 0 | 0 | 0.00000 |
| HETATM | 442 | Pt | 9.25388  | 10.67759 | 28.68868 | Pt | 0 | 0 | 0.00000 |
| HETATM | 443 | Pt | 18.92526 | 27.41410 | 28.68291 | Pt | 0 | 0 | 0.00000 |
| HETATM | 444 | Pt | 18.92458 | 16.25009 | 28.68246 | Pt | 0 | 0 | 0.00000 |
| HETATM | 445 | Pt | 9.26653  | 24.62005 | 28.66719 | Pt | 0 | 0 | 0.00000 |
| HETATM | 446 | Pt | 9.26317  | 13.46444 | 28.66792 | Pt | 0 | 0 | 0.00000 |
| HETATM | 447 | Pt | 18.94532 | 30.20407 | 28.66792 | Pt | 0 | 0 | 0.00000 |
| HETATM | 448 | Pt | 18.93741 | 19.04081 | 28.66985 | Pt | 0 | 0 | 0.00000 |
| HETATM | 449 | O  | 2.82169  | 13.45730 | 29.86539 | O  | 0 | 0 | 0.00000 |
| HETATM | 450 | O  | 2.82422  | 2.29322  | 29.86511 | O  | 0 | 0 | 0.00000 |
| HETATM | 451 | O  | 12.49018 | 19.04231 | 29.86511 | O  | 0 | 0 | 0.00000 |
| HETATM | 452 | O  | 12.98499 | 8.73089  | 29.89019 | O  | 0 | 0 | 0.00000 |

UNIT ENERGY kcal  
ENERGY -57844.866164  
END

XTLGRF 200

DESCRP FS

REMARK Pt111\_0.06ML\_8x8x7\_30.0\_vac hcp-displacement

FIXATOMS 1 128

CRYSTX 22.32970 22.32970 43.67409 90.00000 90.00000 60.00000

FORMAT ATOM (a6,1x,i5,1x,a5,1x,a3,1x,a1,1x,a5,3f10.5,1x,a5,i3,i2,1x,f8.5)

|        |    |    |          |          |          |    |   |   |         |
|--------|----|----|----------|----------|----------|----|---|---|---------|
| HETATM | 1  | Pt | 2.01622  | 12.06214 | 14.99181 | Pt | 0 | 0 | 0.00000 |
| HETATM | 2  | Pt | 2.01622  | 23.22699 | 14.99181 | Pt | 0 | 0 | 0.00000 |
| HETATM | 3  | Pt | 11.68526 | 17.64457 | 14.99181 | Pt | 0 | 0 | 0.00000 |
| HETATM | 4  | Pt | 11.68526 | 28.80942 | 14.99181 | Pt | 0 | 0 | 0.00000 |
| HETATM | 5  | Pt | 2.01622  | 14.85335 | 14.99181 | Pt | 0 | 0 | 0.00000 |
| HETATM | 6  | Pt | 2.01622  | 3.68850  | 14.99181 | Pt | 0 | 0 | 0.00000 |
| HETATM | 7  | Pt | 11.68526 | 20.43578 | 14.99181 | Pt | 0 | 0 | 0.00000 |
| HETATM | 8  | Pt | 11.68526 | 9.27093  | 14.99181 | Pt | 0 | 0 | 0.00000 |
| HETATM | 9  | Pt | 2.01622  | 17.64456 | 14.99181 | Pt | 0 | 0 | 0.00000 |
| HETATM | 10 | Pt | 2.01622  | 6.47971  | 14.99181 | Pt | 0 | 0 | 0.00000 |
| HETATM | 11 | Pt | 11.68526 | 23.22698 | 14.99181 | Pt | 0 | 0 | 0.00000 |
| HETATM | 12 | Pt | 11.68526 | 12.06214 | 14.99181 | Pt | 0 | 0 | 0.00000 |
| HETATM | 13 | Pt | 2.01622  | 20.43578 | 14.99181 | Pt | 0 | 0 | 0.00000 |
| HETATM | 14 | Pt | 2.01622  | 9.27093  | 14.99181 | Pt | 0 | 0 | 0.00000 |
| HETATM | 15 | Pt | 11.68526 | 26.01821 | 14.99181 | Pt | 0 | 0 | 0.00000 |

|        |    |    |          |          |          |    |   |   |         |
|--------|----|----|----------|----------|----------|----|---|---|---------|
| HETATM | 16 | Pt | 11.68526 | 14.85336 | 14.99181 | Pt | 0 | 0 | 0.00000 |
| HETATM | 17 | Pt | 4.43348  | 13.45775 | 14.99181 | Pt | 0 | 0 | 0.00000 |
| HETATM | 18 | Pt | 4.43348  | 24.62260 | 14.99181 | Pt | 0 | 0 | 0.00000 |
| HETATM | 19 | Pt | 14.10252 | 19.04018 | 14.99181 | Pt | 0 | 0 | 0.00000 |
| HETATM | 20 | Pt | 14.10252 | 30.20502 | 14.99181 | Pt | 0 | 0 | 0.00000 |
| HETATM | 21 | Pt | 4.43348  | 16.24896 | 14.99181 | Pt | 0 | 0 | 0.00000 |
| HETATM | 22 | Pt | 4.43348  | 5.08411  | 14.99181 | Pt | 0 | 0 | 0.00000 |
| HETATM | 23 | Pt | 14.10252 | 21.83139 | 14.99181 | Pt | 0 | 0 | 0.00000 |
| HETATM | 24 | Pt | 14.10252 | 10.66653 | 14.99181 | Pt | 0 | 0 | 0.00000 |
| HETATM | 25 | Pt | 4.43348  | 19.04017 | 14.99181 | Pt | 0 | 0 | 0.00000 |
| HETATM | 26 | Pt | 4.43348  | 7.87532  | 14.99181 | Pt | 0 | 0 | 0.00000 |
| HETATM | 27 | Pt | 14.10252 | 24.62260 | 14.99181 | Pt | 0 | 0 | 0.00000 |
| HETATM | 28 | Pt | 14.10252 | 13.45774 | 14.99181 | Pt | 0 | 0 | 0.00000 |
| HETATM | 29 | Pt | 4.43348  | 21.83138 | 14.99181 | Pt | 0 | 0 | 0.00000 |
| HETATM | 30 | Pt | 4.43348  | 10.66653 | 14.99181 | Pt | 0 | 0 | 0.00000 |
| HETATM | 31 | Pt | 14.10252 | 27.41381 | 14.99181 | Pt | 0 | 0 | 0.00000 |
| HETATM | 32 | Pt | 14.10252 | 16.24895 | 14.99181 | Pt | 0 | 0 | 0.00000 |
| HETATM | 33 | Pt | 6.85074  | 14.85335 | 14.99181 | Pt | 0 | 0 | 0.00000 |
| HETATM | 34 | Pt | 6.85074  | 26.01820 | 14.99181 | Pt | 0 | 0 | 0.00000 |
| HETATM | 35 | Pt | 16.51978 | 20.43578 | 14.99181 | Pt | 0 | 0 | 0.00000 |
| HETATM | 36 | Pt | 16.51978 | 31.60063 | 14.99181 | Pt | 0 | 0 | 0.00000 |
| HETATM | 37 | Pt | 6.85074  | 17.64456 | 14.99181 | Pt | 0 | 0 | 0.00000 |
| HETATM | 38 | Pt | 6.85074  | 6.47971  | 14.99181 | Pt | 0 | 0 | 0.00000 |
| HETATM | 39 | Pt | 16.51978 | 23.22698 | 14.99181 | Pt | 0 | 0 | 0.00000 |
| HETATM | 40 | Pt | 16.51978 | 12.06214 | 14.99181 | Pt | 0 | 0 | 0.00000 |
| HETATM | 41 | Pt | 6.85074  | 20.43578 | 14.99181 | Pt | 0 | 0 | 0.00000 |
| HETATM | 42 | Pt | 6.85074  | 9.27093  | 14.99181 | Pt | 0 | 0 | 0.00000 |
| HETATM | 43 | Pt | 16.51978 | 26.01821 | 14.99181 | Pt | 0 | 0 | 0.00000 |
| HETATM | 44 | Pt | 16.51978 | 14.85336 | 14.99181 | Pt | 0 | 0 | 0.00000 |
| HETATM | 45 | Pt | 6.85074  | 23.22699 | 14.99181 | Pt | 0 | 0 | 0.00000 |
| HETATM | 46 | Pt | 6.85074  | 12.06214 | 14.99181 | Pt | 0 | 0 | 0.00000 |
| HETATM | 47 | Pt | 16.51978 | 28.80942 | 14.99181 | Pt | 0 | 0 | 0.00000 |
| HETATM | 48 | Pt | 16.51978 | 17.64457 | 14.99181 | Pt | 0 | 0 | 0.00000 |
| HETATM | 49 | Pt | 9.26800  | 16.24896 | 14.99181 | Pt | 0 | 0 | 0.00000 |
| HETATM | 50 | Pt | 9.26800  | 27.41381 | 14.99181 | Pt | 0 | 0 | 0.00000 |
| HETATM | 51 | Pt | 18.93704 | 21.83139 | 14.99181 | Pt | 0 | 0 | 0.00000 |
| HETATM | 52 | Pt | 18.93704 | 32.99623 | 14.99181 | Pt | 0 | 0 | 0.00000 |
| HETATM | 53 | Pt | 9.26800  | 19.04017 | 14.99181 | Pt | 0 | 0 | 0.00000 |
| HETATM | 54 | Pt | 9.26800  | 7.87532  | 14.99181 | Pt | 0 | 0 | 0.00000 |
| HETATM | 55 | Pt | 18.93704 | 24.62260 | 14.99181 | Pt | 0 | 0 | 0.00000 |
| HETATM | 56 | Pt | 18.93704 | 13.45774 | 14.99181 | Pt | 0 | 0 | 0.00000 |
| HETATM | 57 | Pt | 9.26800  | 21.83138 | 14.99181 | Pt | 0 | 0 | 0.00000 |
| HETATM | 58 | Pt | 9.26800  | 10.66653 | 14.99181 | Pt | 0 | 0 | 0.00000 |
| HETATM | 59 | Pt | 18.93704 | 27.41381 | 14.99181 | Pt | 0 | 0 | 0.00000 |
| HETATM | 60 | Pt | 18.93704 | 16.24895 | 14.99181 | Pt | 0 | 0 | 0.00000 |
| HETATM | 61 | Pt | 9.26800  | 24.62259 | 14.99181 | Pt | 0 | 0 | 0.00000 |
| HETATM | 62 | Pt | 9.26800  | 13.45774 | 14.99181 | Pt | 0 | 0 | 0.00000 |
| HETATM | 63 | Pt | 18.93704 | 30.20502 | 14.99181 | Pt | 0 | 0 | 0.00000 |
| HETATM | 64 | Pt | 18.93704 | 19.04016 | 14.99181 | Pt | 0 | 0 | 0.00000 |
| HETATM | 65 | Pt | 2.82197  | 13.45775 | 17.27083 | Pt | 0 | 0 | 0.00000 |
| HETATM | 66 | Pt | 2.82197  | 2.29290  | 17.27083 | Pt | 0 | 0 | 0.00000 |
| HETATM | 67 | Pt | 12.49101 | 19.04018 | 17.27083 | Pt | 0 | 0 | 0.00000 |
| HETATM | 68 | Pt | 12.49101 | 7.87532  | 17.27083 | Pt | 0 | 0 | 0.00000 |
| HETATM | 69 | Pt | 2.82197  | 16.24896 | 17.27083 | Pt | 0 | 0 | 0.00000 |
| HETATM | 70 | Pt | 2.82197  | 5.08411  | 17.27083 | Pt | 0 | 0 | 0.00000 |
| HETATM | 71 | Pt | 12.49101 | 21.83139 | 17.27083 | Pt | 0 | 0 | 0.00000 |
| HETATM | 72 | Pt | 12.49101 | 10.66653 | 17.27083 | Pt | 0 | 0 | 0.00000 |
| HETATM | 73 | Pt | 2.82197  | 19.04017 | 17.27083 | Pt | 0 | 0 | 0.00000 |
| HETATM | 74 | Pt | 2.82197  | 7.87532  | 17.27083 | Pt | 0 | 0 | 0.00000 |
| HETATM | 75 | Pt | 12.49101 | 24.62260 | 17.27083 | Pt | 0 | 0 | 0.00000 |
| HETATM | 76 | Pt | 12.49101 | 13.45774 | 17.27083 | Pt | 0 | 0 | 0.00000 |
| HETATM | 77 | Pt | 2.82197  | 21.83138 | 17.27083 | Pt | 0 | 0 | 0.00000 |
| HETATM | 78 | Pt | 2.82197  | 10.66653 | 17.27083 | Pt | 0 | 0 | 0.00000 |



|        |     |    |          |          |          |    |   |   |         |
|--------|-----|----|----------|----------|----------|----|---|---|---------|
| HETATM | 79  | Pt | 12.49101 | 27.41381 | 17.27083 | Pt | 0 | 0 | 0.00000 |
| HETATM | 80  | Pt | 12.49101 | 16.24895 | 17.27083 | Pt | 0 | 0 | 0.00000 |
| HETATM | 81  | Pt | 5.23923  | 14.85335 | 17.27083 | Pt | 0 | 0 | 0.00000 |
| HETATM | 82  | Pt | 5.23923  | 3.68850  | 17.27083 | Pt | 0 | 0 | 0.00000 |
| HETATM | 83  | Pt | 14.90827 | 20.43578 | 17.27083 | Pt | 0 | 0 | 0.00000 |
| HETATM | 84  | Pt | 14.90827 | 9.27093  | 17.27083 | Pt | 0 | 0 | 0.00000 |
| HETATM | 85  | Pt | 5.23923  | 17.64456 | 17.27083 | Pt | 0 | 0 | 0.00000 |
| HETATM | 86  | Pt | 5.23923  | 6.47971  | 17.27083 | Pt | 0 | 0 | 0.00000 |
| HETATM | 87  | Pt | 14.90827 | 23.22698 | 17.27083 | Pt | 0 | 0 | 0.00000 |
| HETATM | 88  | Pt | 14.90827 | 12.06214 | 17.27083 | Pt | 0 | 0 | 0.00000 |
| HETATM | 89  | Pt | 5.23923  | 20.43578 | 17.27083 | Pt | 0 | 0 | 0.00000 |
| HETATM | 90  | Pt | 5.23923  | 9.27093  | 17.27083 | Pt | 0 | 0 | 0.00000 |
| HETATM | 91  | Pt | 14.90827 | 26.01821 | 17.27083 | Pt | 0 | 0 | 0.00000 |
| HETATM | 92  | Pt | 14.90827 | 14.85336 | 17.27083 | Pt | 0 | 0 | 0.00000 |
| HETATM | 93  | Pt | 5.23923  | 23.22699 | 17.27083 | Pt | 0 | 0 | 0.00000 |
| HETATM | 94  | Pt | 5.23923  | 12.06214 | 17.27083 | Pt | 0 | 0 | 0.00000 |
| HETATM | 95  | Pt | 14.90827 | 28.80942 | 17.27083 | Pt | 0 | 0 | 0.00000 |
| HETATM | 96  | Pt | 14.90827 | 17.64457 | 17.27083 | Pt | 0 | 0 | 0.00000 |
| HETATM | 97  | Pt | 7.65649  | 16.24896 | 17.27083 | Pt | 0 | 0 | 0.00000 |
| HETATM | 98  | Pt | 7.65649  | 5.08411  | 17.27083 | Pt | 0 | 0 | 0.00000 |
| HETATM | 99  | Pt | 17.32553 | 21.83139 | 17.27083 | Pt | 0 | 0 | 0.00000 |
| HETATM | 100 | Pt | 17.32553 | 10.66653 | 17.27083 | Pt | 0 | 0 | 0.00000 |
| HETATM | 101 | Pt | 7.65649  | 19.04017 | 17.27083 | Pt | 0 | 0 | 0.00000 |
| HETATM | 102 | Pt | 7.65649  | 7.87532  | 17.27083 | Pt | 0 | 0 | 0.00000 |
| HETATM | 103 | Pt | 17.32553 | 24.62260 | 17.27083 | Pt | 0 | 0 | 0.00000 |
| HETATM | 104 | Pt | 17.32553 | 13.45774 | 17.27083 | Pt | 0 | 0 | 0.00000 |
| HETATM | 105 | Pt | 7.65649  | 21.83138 | 17.27083 | Pt | 0 | 0 | 0.00000 |
| HETATM | 106 | Pt | 7.65649  | 10.66653 | 17.27083 | Pt | 0 | 0 | 0.00000 |
| HETATM | 107 | Pt | 17.32553 | 27.41381 | 17.27083 | Pt | 0 | 0 | 0.00000 |
| HETATM | 108 | Pt | 17.32553 | 16.24895 | 17.27083 | Pt | 0 | 0 | 0.00000 |
| HETATM | 109 | Pt | 7.65649  | 24.62259 | 17.27083 | Pt | 0 | 0 | 0.00000 |
| HETATM | 110 | Pt | 7.65649  | 13.45774 | 17.27083 | Pt | 0 | 0 | 0.00000 |
| HETATM | 111 | Pt | 17.32553 | 30.20502 | 17.27083 | Pt | 0 | 0 | 0.00000 |
| HETATM | 112 | Pt | 17.32553 | 19.04016 | 17.27083 | Pt | 0 | 0 | 0.00000 |
| HETATM | 113 | Pt | 10.07376 | 17.64456 | 17.27083 | Pt | 0 | 0 | 0.00000 |
| HETATM | 114 | Pt | 10.07376 | 6.47971  | 17.27083 | Pt | 0 | 0 | 0.00000 |
| HETATM | 115 | Pt | 0.40471  | 12.06213 | 17.27083 | Pt | 0 | 0 | 0.00000 |
| HETATM | 116 | Pt | 0.40471  | 0.89729  | 17.27083 | Pt | 0 | 0 | 0.00000 |
| HETATM | 117 | Pt | 10.07376 | 20.43578 | 17.27083 | Pt | 0 | 0 | 0.00000 |
| HETATM | 118 | Pt | 10.07376 | 9.27093  | 17.27083 | Pt | 0 | 0 | 0.00000 |
| HETATM | 119 | Pt | 0.40471  | 14.85336 | 17.27083 | Pt | 0 | 0 | 0.00000 |
| HETATM | 120 | Pt | 0.40471  | 3.68851  | 17.27083 | Pt | 0 | 0 | 0.00000 |
| HETATM | 121 | Pt | 10.07376 | 23.22699 | 17.27083 | Pt | 0 | 0 | 0.00000 |
| HETATM | 122 | Pt | 10.07376 | 12.06214 | 17.27083 | Pt | 0 | 0 | 0.00000 |
| HETATM | 123 | Pt | 0.40471  | 17.64457 | 17.27083 | Pt | 0 | 0 | 0.00000 |
| HETATM | 124 | Pt | 0.40471  | 6.47972  | 17.27083 | Pt | 0 | 0 | 0.00000 |
| HETATM | 125 | Pt | 10.07376 | 26.01820 | 17.27083 | Pt | 0 | 0 | 0.00000 |
| HETATM | 126 | Pt | 10.07376 | 14.85335 | 17.27083 | Pt | 0 | 0 | 0.00000 |
| HETATM | 127 | Pt | 0.40471  | 20.43578 | 17.27083 | Pt | 0 | 0 | 0.00000 |
| HETATM | 128 | Pt | 0.40471  | 9.27093  | 17.27083 | Pt | 0 | 0 | 0.00000 |
| HETATM | 129 | Pt | 3.62732  | 14.85265 | 19.55122 | Pt | 0 | 0 | 0.00000 |
| HETATM | 130 | Pt | 3.62730  | 3.68859  | 19.55103 | Pt | 0 | 0 | 0.00000 |
| HETATM | 131 | Pt | 13.29705 | 20.43546 | 19.55104 | Pt | 0 | 0 | 0.00000 |
| HETATM | 132 | Pt | 13.29680 | 9.27099  | 19.54896 | Pt | 0 | 0 | 0.00000 |
| HETATM | 133 | Pt | 3.62763  | 17.64402 | 19.54926 | Pt | 0 | 0 | 0.00000 |
| HETATM | 134 | Pt | 3.62772  | 6.47979  | 19.54951 | Pt | 0 | 0 | 0.00000 |
| HETATM | 135 | Pt | 13.29724 | 23.22696 | 19.54970 | Pt | 0 | 0 | 0.00000 |
| HETATM | 136 | Pt | 13.29681 | 12.06244 | 19.54912 | Pt | 0 | 0 | 0.00000 |
| HETATM | 137 | Pt | 3.62796  | 20.43595 | 19.54858 | Pt | 0 | 0 | 0.00000 |
| HETATM | 138 | Pt | 3.62777  | 9.27112  | 19.54956 | Pt | 0 | 0 | 0.00000 |
| HETATM | 139 | Pt | 13.29704 | 26.01817 | 19.54918 | Pt | 0 | 0 | 0.00000 |
| HETATM | 140 | Pt | 13.29710 | 14.85352 | 19.54986 | Pt | 0 | 0 | 0.00000 |
| HETATM | 141 | Pt | 3.62730  | 23.22761 | 19.55070 | Pt | 0 | 0 | 0.00000 |

|        |     |    |          |          |          |    |   |   |         |
|--------|-----|----|----------|----------|----------|----|---|---|---------|
| HETATM | 142 | Pt | 3.62749  | 12.06219 | 19.55117 | Pt | 0 | 0 | 0.00000 |
| HETATM | 143 | Pt | 13.29691 | 28.80924 | 19.54882 | Pt | 0 | 0 | 0.00000 |
| HETATM | 144 | Pt | 13.29703 | 17.64460 | 19.55133 | Pt | 0 | 0 | 0.00000 |
| HETATM | 145 | Pt | 6.04456  | 16.24861 | 19.54926 | Pt | 0 | 0 | 0.00000 |
| HETATM | 146 | Pt | 6.04472  | 5.08450  | 19.54970 | Pt | 0 | 0 | 0.00000 |
| HETATM | 147 | Pt | 15.71409 | 21.83142 | 19.54951 | Pt | 0 | 0 | 0.00000 |
| HETATM | 148 | Pt | 15.71426 | 10.66673 | 19.54912 | Pt | 0 | 0 | 0.00000 |
| HETATM | 149 | Pt | 6.04490  | 19.04003 | 19.54815 | Pt | 0 | 0 | 0.00000 |
| HETATM | 150 | Pt | 6.04506  | 7.87556  | 19.54966 | Pt | 0 | 0 | 0.00000 |
| HETATM | 151 | Pt | 15.71420 | 24.62279 | 19.54966 | Pt | 0 | 0 | 0.00000 |
| HETATM | 152 | Pt | 15.71405 | 13.45780 | 19.54985 | Pt | 0 | 0 | 0.00000 |
| HETATM | 153 | Pt | 6.04466  | 21.83145 | 19.54852 | Pt | 0 | 0 | 0.00000 |
| HETATM | 154 | Pt | 6.04482  | 10.66643 | 19.55016 | Pt | 0 | 0 | 0.00000 |
| HETATM | 155 | Pt | 15.71423 | 27.41375 | 19.54968 | Pt | 0 | 0 | 0.00000 |
| HETATM | 156 | Pt | 15.71399 | 16.24879 | 19.55013 | Pt | 0 | 0 | 0.00000 |
| HETATM | 157 | Pt | 6.04401  | 24.62280 | 19.55010 | Pt | 0 | 0 | 0.00000 |
| HETATM | 158 | Pt | 6.04420  | 13.45739 | 19.55091 | Pt | 0 | 0 | 0.00000 |
| HETATM | 159 | Pt | 15.71450 | 30.20487 | 19.54909 | Pt | 0 | 0 | 0.00000 |
| HETATM | 160 | Pt | 15.71365 | 19.04008 | 19.55057 | Pt | 0 | 0 | 0.00000 |
| HETATM | 161 | Pt | 8.46228  | 17.64485 | 19.54858 | Pt | 0 | 0 | 0.00000 |
| HETATM | 162 | Pt | 8.46208  | 6.47993  | 19.54918 | Pt | 0 | 0 | 0.00000 |
| HETATM | 163 | Pt | 18.13143 | 23.22713 | 19.54955 | Pt | 0 | 0 | 0.00000 |
| HETATM | 164 | Pt | 18.13126 | 12.06251 | 19.54986 | Pt | 0 | 0 | 0.00000 |
| HETATM | 165 | Pt | 8.46247  | 20.43553 | 19.54851 | Pt | 0 | 0 | 0.00000 |
| HETATM | 166 | Pt | 8.46210  | 9.27108  | 19.54968 | Pt | 0 | 0 | 0.00000 |
| HETATM | 167 | Pt | 18.13128 | 26.01801 | 19.55016 | Pt | 0 | 0 | 0.00000 |
| HETATM | 168 | Pt | 18.13116 | 14.85323 | 19.55013 | Pt | 0 | 0 | 0.00000 |
| HETATM | 169 | Pt | 8.46187  | 23.22634 | 19.54857 | Pt | 0 | 0 | 0.00000 |
| HETATM | 170 | Pt | 8.46164  | 12.06213 | 19.54962 | Pt | 0 | 0 | 0.00000 |
| HETATM | 171 | Pt | 18.13158 | 28.80888 | 19.54962 | Pt | 0 | 0 | 0.00000 |
| HETATM | 172 | Pt | 18.13111 | 17.64426 | 19.54963 | Pt | 0 | 0 | 0.00000 |
| HETATM | 173 | Pt | 8.46155  | 26.01803 | 19.54857 | Pt | 0 | 0 | 0.00000 |
| HETATM | 174 | Pt | 8.46177  | 14.85377 | 19.54916 | Pt | 0 | 0 | 0.00000 |
| HETATM | 175 | Pt | 18.13190 | 31.60094 | 19.54884 | Pt | 0 | 0 | 0.00000 |
| HETATM | 176 | Pt | 18.13119 | 20.43606 | 19.54947 | Pt | 0 | 0 | 0.00000 |
| HETATM | 177 | Pt | 10.88025 | 19.04012 | 19.55071 | Pt | 0 | 0 | 0.00000 |
| HETATM | 178 | Pt | 10.87929 | 7.87536  | 19.54882 | Pt | 0 | 0 | 0.00000 |
| HETATM | 179 | Pt | 1.21062  | 13.45757 | 19.55117 | Pt | 0 | 0 | 0.00000 |
| HETATM | 180 | Pt | 1.21036  | 2.29314  | 19.55133 | Pt | 0 | 0 | 0.00000 |
| HETATM | 181 | Pt | 10.88017 | 21.83065 | 19.55011 | Pt | 0 | 0 | 0.00000 |
| HETATM | 182 | Pt | 10.87914 | 10.66686 | 19.54909 | Pt | 0 | 0 | 0.00000 |
| HETATM | 183 | Pt | 1.21055  | 16.24810 | 19.55091 | Pt | 0 | 0 | 0.00000 |
| HETATM | 184 | Pt | 1.21057  | 5.08374  | 19.55057 | Pt | 0 | 0 | 0.00000 |
| HETATM | 185 | Pt | 10.87970 | 24.62191 | 19.54858 | Pt | 0 | 0 | 0.00000 |
| HETATM | 186 | Pt | 10.87947 | 13.45844 | 19.54884 | Pt | 0 | 0 | 0.00000 |
| HETATM | 187 | Pt | 1.21107  | 19.03997 | 19.54916 | Pt | 0 | 0 | 0.00000 |
| HETATM | 188 | Pt | 1.21075  | 7.87538  | 19.54947 | Pt | 0 | 0 | 0.00000 |
| HETATM | 189 | Pt | 10.87928 | 27.41342 | 19.54838 | Pt | 0 | 0 | 0.00000 |
| HETATM | 190 | Pt | 10.87994 | 16.24977 | 19.55002 | Pt | 0 | 0 | 0.00000 |
| HETATM | 191 | Pt | 1.21094  | 21.83217 | 19.55002 | Pt | 0 | 0 | 0.00000 |
| HETATM | 192 | Pt | 1.21073  | 10.66701 | 19.55044 | Pt | 0 | 0 | 0.00000 |
| HETATM | 193 | Pt | 2.01670  | 12.06297 | 21.83269 | Pt | 0 | 0 | 0.00000 |
| HETATM | 194 | Pt | 2.01643  | 23.22858 | 21.83242 | Pt | 0 | 0 | 0.00000 |
| HETATM | 195 | Pt | 11.68653 | 17.64555 | 21.83243 | Pt | 0 | 0 | 0.00000 |
| HETATM | 196 | Pt | 11.68497 | 28.80891 | 21.82563 | Pt | 0 | 0 | 0.00000 |
| HETATM | 197 | Pt | 2.01628  | 14.85173 | 21.83318 | Pt | 0 | 0 | 0.00000 |
| HETATM | 198 | Pt | 2.01632  | 3.68777  | 21.83279 | Pt | 0 | 0 | 0.00000 |
| HETATM | 199 | Pt | 11.68663 | 20.43462 | 21.83216 | Pt | 0 | 0 | 0.00000 |
| HETATM | 200 | Pt | 11.68477 | 9.27106  | 21.82659 | Pt | 0 | 0 | 0.00000 |
| HETATM | 201 | Pt | 2.01641  | 17.64342 | 21.82847 | Pt | 0 | 0 | 0.00000 |
| HETATM | 202 | Pt | 2.01666  | 6.47919  | 21.82851 | Pt | 0 | 0 | 0.00000 |
| HETATM | 203 | Pt | 11.68641 | 23.22610 | 21.82799 | Pt | 0 | 0 | 0.00000 |
| HETATM | 204 | Pt | 11.68493 | 12.06295 | 21.82642 | Pt | 0 | 0 | 0.00000 |

|        |     |    |          |          |          |    |   |   |         |
|--------|-----|----|----------|----------|----------|----|---|---|---------|
| HETATM | 205 | Pt | 2.01758  | 20.43660 | 21.82665 | Pt | 0 | 0 | 0.00000 |
| HETATM | 206 | Pt | 2.01675  | 9.27165  | 21.82847 | Pt | 0 | 0 | 0.00000 |
| HETATM | 207 | Pt | 11.68524 | 26.01756 | 21.82589 | Pt | 0 | 0 | 0.00000 |
| HETATM | 208 | Pt | 11.68604 | 14.85471 | 21.82773 | Pt | 0 | 0 | 0.00000 |
| HETATM | 209 | Pt | 4.43203  | 13.45699 | 21.83318 | Pt | 0 | 0 | 0.00000 |
| HETATM | 210 | Pt | 4.43179  | 24.62321 | 21.83216 | Pt | 0 | 0 | 0.00000 |
| HETATM | 211 | Pt | 14.10183 | 19.03989 | 21.83279 | Pt | 0 | 0 | 0.00000 |
| HETATM | 212 | Pt | 14.10288 | 30.20466 | 21.82659 | Pt | 0 | 0 | 0.00000 |
| HETATM | 213 | Pt | 4.43305  | 16.24822 | 21.82873 | Pt | 0 | 0 | 0.00000 |
| HETATM | 214 | Pt | 4.43337  | 5.08472  | 21.82907 | Pt | 0 | 0 | 0.00000 |
| HETATM | 215 | Pt | 14.10310 | 21.83160 | 21.82907 | Pt | 0 | 0 | 0.00000 |
| HETATM | 216 | Pt | 14.10275 | 10.66694 | 21.82688 | Pt | 0 | 0 | 0.00000 |
| HETATM | 217 | Pt | 4.43361  | 19.03995 | 21.82580 | Pt | 0 | 0 | 0.00000 |
| HETATM | 218 | Pt | 4.43357  | 7.87558  | 21.82773 | Pt | 0 | 0 | 0.00000 |
| HETATM | 219 | Pt | 14.10305 | 24.62344 | 21.82855 | Pt | 0 | 0 | 0.00000 |
| HETATM | 220 | Pt | 14.10285 | 13.45749 | 21.82891 | Pt | 0 | 0 | 0.00000 |
| HETATM | 221 | Pt | 4.43349  | 21.83181 | 21.82733 | Pt | 0 | 0 | 0.00000 |
| HETATM | 222 | Pt | 4.43348  | 10.66626 | 21.82949 | Pt | 0 | 0 | 0.00000 |
| HETATM | 223 | Pt | 14.10284 | 27.41399 | 21.82813 | Pt | 0 | 0 | 0.00000 |
| HETATM | 224 | Pt | 14.10306 | 16.24826 | 21.83046 | Pt | 0 | 0 | 0.00000 |
| HETATM | 225 | Pt | 6.84965  | 14.85295 | 21.82847 | Pt | 0 | 0 | 0.00000 |
| HETATM | 226 | Pt | 6.84939  | 26.01876 | 21.82798 | Pt | 0 | 0 | 0.00000 |
| HETATM | 227 | Pt | 16.51911 | 20.43590 | 21.82851 | Pt | 0 | 0 | 0.00000 |
| HETATM | 228 | Pt | 16.52065 | 31.60074 | 21.82642 | Pt | 0 | 0 | 0.00000 |
| HETATM | 229 | Pt | 6.85048  | 17.64457 | 21.82580 | Pt | 0 | 0 | 0.00000 |
| HETATM | 230 | Pt | 6.85120  | 6.48060  | 21.82855 | Pt | 0 | 0 | 0.00000 |
| HETATM | 231 | Pt | 16.51996 | 23.22720 | 21.82774 | Pt | 0 | 0 | 0.00000 |
| HETATM | 232 | Pt | 16.51940 | 12.06230 | 21.82891 | Pt | 0 | 0 | 0.00000 |
| HETATM | 233 | Pt | 6.85073  | 20.43577 | 21.82528 | Pt | 0 | 0 | 0.00000 |
| HETATM | 234 | Pt | 6.85122  | 9.27086  | 21.82940 | Pt | 0 | 0 | 0.00000 |
| HETATM | 235 | Pt | 16.51948 | 26.01859 | 21.82940 | Pt | 0 | 0 | 0.00000 |
| HETATM | 236 | Pt | 16.51957 | 14.85297 | 21.82954 | Pt | 0 | 0 | 0.00000 |
| HETATM | 237 | Pt | 6.84947  | 23.22687 | 21.82680 | Pt | 0 | 0 | 0.00000 |
| HETATM | 238 | Pt | 6.84987  | 12.06125 | 21.83012 | Pt | 0 | 0 | 0.00000 |
| HETATM | 239 | Pt | 16.51985 | 28.80916 | 21.82861 | Pt | 0 | 0 | 0.00000 |
| HETATM | 240 | Pt | 16.51904 | 17.64424 | 21.82900 | Pt | 0 | 0 | 0.00000 |
| HETATM | 241 | Pt | 9.26803  | 16.25056 | 21.82665 | Pt | 0 | 0 | 0.00000 |
| HETATM | 242 | Pt | 9.26745  | 27.41347 | 21.82589 | Pt | 0 | 0 | 0.00000 |
| HETATM | 243 | Pt | 18.93739 | 21.83221 | 21.82847 | Pt | 0 | 0 | 0.00000 |
| HETATM | 244 | Pt | 18.93783 | 32.99759 | 21.82773 | Pt | 0 | 0 | 0.00000 |
| HETATM | 245 | Pt | 9.26836  | 19.04039 | 21.82733 | Pt | 0 | 0 | 0.00000 |
| HETATM | 246 | Pt | 9.26800  | 7.87569  | 21.82812 | Pt | 0 | 0 | 0.00000 |
| HETATM | 247 | Pt | 18.93680 | 24.62247 | 21.82949 | Pt | 0 | 0 | 0.00000 |
| HETATM | 248 | Pt | 18.93617 | 13.45787 | 21.83046 | Pt | 0 | 0 | 0.00000 |
| HETATM | 249 | Pt | 9.26853  | 21.83023 | 21.82680 | Pt | 0 | 0 | 0.00000 |
| HETATM | 250 | Pt | 9.26774  | 10.66647 | 21.82861 | Pt | 0 | 0 | 0.00000 |
| HETATM | 251 | Pt | 18.93670 | 27.41261 | 21.83011 | Pt | 0 | 0 | 0.00000 |
| HETATM | 252 | Pt | 18.93713 | 16.24815 | 21.82899 | Pt | 0 | 0 | 0.00000 |
| HETATM | 253 | Pt | 9.26756  | 24.62183 | 21.82415 | Pt | 0 | 0 | 0.00000 |
| HETATM | 254 | Pt | 9.26768  | 13.45791 | 21.82572 | Pt | 0 | 0 | 0.00000 |
| HETATM | 255 | Pt | 18.93734 | 30.20483 | 21.82572 | Pt | 0 | 0 | 0.00000 |
| HETATM | 256 | Pt | 18.93704 | 19.04017 | 21.82609 | Pt | 0 | 0 | 0.00000 |
| HETATM | 257 | Pt | 2.82157  | 13.45705 | 24.12268 | Pt | 0 | 0 | 0.00000 |
| HETATM | 258 | Pt | 2.82160  | 2.29350  | 24.12178 | Pt | 0 | 0 | 0.00000 |
| HETATM | 259 | Pt | 12.49172 | 19.04015 | 24.12178 | Pt | 0 | 0 | 0.00000 |
| HETATM | 260 | Pt | 12.49065 | 7.87470  | 24.10222 | Pt | 0 | 0 | 0.00000 |
| HETATM | 261 | Pt | 2.82302  | 16.24628 | 24.11032 | Pt | 0 | 0 | 0.00000 |
| HETATM | 262 | Pt | 2.82372  | 5.08244  | 24.11033 | Pt | 0 | 0 | 0.00000 |
| HETATM | 263 | Pt | 12.49365 | 21.82984 | 24.10995 | Pt | 0 | 0 | 0.00000 |
| HETATM | 264 | Pt | 12.49076 | 10.66671 | 24.10260 | Pt | 0 | 0 | 0.00000 |
| HETATM | 265 | Pt | 2.82172  | 19.03990 | 24.10334 | Pt | 0 | 0 | 0.00000 |
| HETATM | 266 | Pt | 2.82091  | 7.87544  | 24.10555 | Pt | 0 | 0 | 0.00000 |
| HETATM | 267 | Pt | 12.49071 | 24.62336 | 24.10556 | Pt | 0 | 0 | 0.00000 |

|        |     |    |          |          |          |    |   |   |         |
|--------|-----|----|----------|----------|----------|----|---|---|---------|
| HETATM | 268 | Pt | 12.49005 | 13.45840 | 24.10476 | Pt | 0 | 0 | 0.00000 |
| HETATM | 269 | Pt | 2.82476  | 21.83409 | 24.10825 | Pt | 0 | 0 | 0.00000 |
| HETATM | 270 | Pt | 2.82392  | 10.66834 | 24.11046 | Pt | 0 | 0 | 0.00000 |
| HETATM | 271 | Pt | 12.49052 | 27.41327 | 24.10337 | Pt | 0 | 0 | 0.00000 |
| HETATM | 272 | Pt | 12.49344 | 16.25038 | 24.11124 | Pt | 0 | 0 | 0.00000 |
| HETATM | 273 | Pt | 5.23638  | 14.85293 | 24.11032 | Pt | 0 | 0 | 0.00000 |
| HETATM | 274 | Pt | 5.23656  | 3.69002  | 24.10996 | Pt | 0 | 0 | 0.00000 |
| HETATM | 275 | Pt | 14.90596 | 20.43646 | 24.11033 | Pt | 0 | 0 | 0.00000 |
| HETATM | 276 | Pt | 14.90855 | 9.27080  | 24.10260 | Pt | 0 | 0 | 0.00000 |
| HETATM | 277 | Pt | 5.23938  | 17.64483 | 24.10363 | Pt | 0 | 0 | 0.00000 |
| HETATM | 278 | Pt | 5.24025  | 6.48119  | 24.10622 | Pt | 0 | 0 | 0.00000 |
| HETATM | 279 | Pt | 14.90904 | 23.22861 | 24.10622 | Pt | 0 | 0 | 0.00000 |
| HETATM | 280 | Pt | 14.90779 | 12.06131 | 24.10954 | Pt | 0 | 0 | 0.00000 |
| HETATM | 281 | Pt | 5.23995  | 20.43555 | 24.10272 | Pt | 0 | 0 | 0.00000 |
| HETATM | 282 | Pt | 5.24014  | 9.27009  | 24.10684 | Pt | 0 | 0 | 0.00000 |
| HETATM | 283 | Pt | 14.90811 | 26.02047 | 24.10994 | Pt | 0 | 0 | 0.00000 |
| HETATM | 284 | Pt | 14.90889 | 14.85078 | 24.11041 | Pt | 0 | 0 | 0.00000 |
| HETATM | 285 | Pt | 5.23651  | 23.22704 | 24.10848 | Pt | 0 | 0 | 0.00000 |
| HETATM | 286 | Pt | 5.23713  | 12.06020 | 24.11179 | Pt | 0 | 0 | 0.00000 |
| HETATM | 287 | Pt | 14.90754 | 28.80990 | 24.10851 | Pt | 0 | 0 | 0.00000 |
| HETATM | 288 | Pt | 14.90597 | 17.64318 | 24.11123 | Pt | 0 | 0 | 0.00000 |
| HETATM | 289 | Pt | 7.65638  | 16.24861 | 24.10334 | Pt | 0 | 0 | 0.00000 |
| HETATM | 290 | Pt | 7.65731  | 5.08423  | 24.10557 | Pt | 0 | 0 | 0.00000 |
| HETATM | 291 | Pt | 17.32616 | 21.83053 | 24.10555 | Pt | 0 | 0 | 0.00000 |
| HETATM | 292 | Pt | 17.32658 | 10.66603 | 24.10477 | Pt | 0 | 0 | 0.00000 |
| HETATM | 293 | Pt | 7.65593  | 19.04067 | 24.10272 | Pt | 0 | 0 | 0.00000 |
| HETATM | 294 | Pt | 7.65854  | 7.87632  | 24.10994 | Pt | 0 | 0 | 0.00000 |
| HETATM | 295 | Pt | 17.32435 | 24.62297 | 24.10684 | Pt | 0 | 0 | 0.00000 |
| HETATM | 296 | Pt | 17.32299 | 13.45699 | 24.11041 | Pt | 0 | 0 | 0.00000 |
| HETATM | 297 | Pt | 7.65705  | 21.83236 | 24.10263 | Pt | 0 | 0 | 0.00000 |
| HETATM | 298 | Pt | 7.65856  | 10.66553 | 24.11028 | Pt | 0 | 0 | 0.00000 |
| HETATM | 299 | Pt | 17.32362 | 27.41510 | 24.11028 | Pt | 0 | 0 | 0.00000 |
| HETATM | 300 | Pt | 17.32592 | 16.24964 | 24.10685 | Pt | 0 | 0 | 0.00000 |
| HETATM | 301 | Pt | 7.65743  | 24.62238 | 24.10123 | Pt | 0 | 0 | 0.00000 |
| HETATM | 302 | Pt | 7.65861  | 13.45661 | 24.10453 | Pt | 0 | 0 | 0.00000 |
| HETATM | 303 | Pt | 17.32554 | 30.20501 | 24.10492 | Pt | 0 | 0 | 0.00000 |
| HETATM | 304 | Pt | 17.32692 | 19.04009 | 24.10408 | Pt | 0 | 0 | 0.00000 |
| HETATM | 305 | Pt | 10.07470 | 17.64833 | 24.10824 | Pt | 0 | 0 | 0.00000 |
| HETATM | 306 | Pt | 10.07352 | 6.47902  | 24.10337 | Pt | 0 | 0 | 0.00000 |
| HETATM | 307 | Pt | 0.40529  | 12.06473 | 24.11046 | Pt | 0 | 0 | 0.00000 |
| HETATM | 308 | Pt | 0.40473  | 0.90010  | 24.11125 | Pt | 0 | 0 | 0.00000 |
| HETATM | 309 | Pt | 10.07516 | 20.43345 | 24.10848 | Pt | 0 | 0 | 0.00000 |
| HETATM | 310 | Pt | 10.07454 | 9.27054  | 24.10851 | Pt | 0 | 0 | 0.00000 |
| HETATM | 311 | Pt | 0.40407  | 14.85056 | 24.11178 | Pt | 0 | 0 | 0.00000 |
| HETATM | 312 | Pt | 0.40466  | 3.68581  | 24.11123 | Pt | 0 | 0 | 0.00000 |
| HETATM | 313 | Pt | 10.07310 | 23.22770 | 24.10123 | Pt | 0 | 0 | 0.00000 |
| HETATM | 314 | Pt | 10.07374 | 12.06213 | 24.10492 | Pt | 0 | 0 | 0.00000 |
| HETATM | 315 | Pt | 0.40267  | 17.64583 | 24.10453 | Pt | 0 | 0 | 0.00000 |
| HETATM | 316 | Pt | 0.40394  | 6.48088  | 24.10408 | Pt | 0 | 0 | 0.00000 |
| HETATM | 317 | Pt | 10.07261 | 26.01623 | 24.10101 | Pt | 0 | 0 | 0.00000 |
| HETATM | 318 | Pt | 10.07189 | 14.85428 | 24.09991 | Pt | 0 | 0 | 0.00000 |
| HETATM | 319 | Pt | 0.40644  | 20.43462 | 24.09991 | Pt | 0 | 0 | 0.00000 |
| HETATM | 320 | Pt | 0.40401  | 9.26972  | 24.10381 | Pt | 0 | 0 | 0.00000 |
| HETATM | 321 | Pt | 3.62610  | 14.85054 | 26.41126 | Pt | 0 | 0 | 0.00000 |
| HETATM | 322 | Pt | 3.62736  | 3.68751  | 26.41089 | Pt | 0 | 0 | 0.00000 |
| HETATM | 323 | Pt | 13.29608 | 20.43496 | 26.41090 | Pt | 0 | 0 | 0.00000 |
| HETATM | 324 | Pt | 13.29608 | 9.26974  | 26.37784 | Pt | 0 | 0 | 0.00000 |
| HETATM | 325 | Pt | 3.62665  | 17.64647 | 26.38009 | Pt | 0 | 0 | 0.00000 |
| HETATM | 326 | Pt | 3.62696  | 6.48268  | 26.38201 | Pt | 0 | 0 | 0.00000 |
| HETATM | 327 | Pt | 13.29476 | 23.23214 | 26.38187 | Pt | 0 | 0 | 0.00000 |
| HETATM | 328 | Pt | 13.28915 | 12.06014 | 26.38360 | Pt | 0 | 0 | 0.00000 |
| HETATM | 329 | Pt | 3.62802  | 20.43365 | 26.37885 | Pt | 0 | 0 | 0.00000 |
| HETATM | 330 | Pt | 3.62703  | 9.26816  | 26.38233 | Pt | 0 | 0 | 0.00000 |

|        |     |    |          |          |          |    |   |   |         |
|--------|-----|----|----------|----------|----------|----|---|---|---------|
| HETATM | 331 | Pt | 13.29467 | 26.02115 | 26.38688 | Pt | 0 | 0 | 0.00000 |
| HETATM | 332 | Pt | 13.29365 | 14.84811 | 26.38653 | Pt | 0 | 0 | 0.00000 |
| HETATM | 333 | Pt | 3.62791  | 23.23002 | 26.40971 | Pt | 0 | 0 | 0.00000 |
| HETATM | 334 | Pt | 3.62748  | 12.06293 | 26.41206 | Pt | 0 | 0 | 0.00000 |
| HETATM | 335 | Pt | 13.28888 | 28.80935 | 26.38291 | Pt | 0 | 0 | 0.00000 |
| HETATM | 336 | Pt | 13.29559 | 17.64659 | 26.41136 | Pt | 0 | 0 | 0.00000 |
| HETATM | 337 | Pt | 6.04717  | 16.24898 | 26.38009 | Pt | 0 | 0 | 0.00000 |
| HETATM | 338 | Pt | 6.05045  | 5.08494  | 26.38186 | Pt | 0 | 0 | 0.00000 |
| HETATM | 339 | Pt | 15.71697 | 21.83221 | 26.38201 | Pt | 0 | 0 | 0.00000 |
| HETATM | 340 | Pt | 15.71610 | 10.65894 | 26.38360 | Pt | 0 | 0 | 0.00000 |
| HETATM | 341 | Pt | 6.04532  | 19.04075 | 26.38076 | Pt | 0 | 0 | 0.00000 |
| HETATM | 342 | Pt | 6.04801  | 7.87563  | 26.38639 | Pt | 0 | 0 | 0.00000 |
| HETATM | 343 | Pt | 15.71279 | 24.62537 | 26.38639 | Pt | 0 | 0 | 0.00000 |
| HETATM | 344 | Pt | 15.71050 | 13.45164 | 26.39808 | Pt | 0 | 0 | 0.00000 |
| HETATM | 345 | Pt | 6.04857  | 21.83223 | 26.37886 | Pt | 0 | 0 | 0.00000 |
| HETATM | 346 | Pt | 6.05227  | 10.66436 | 26.38507 | Pt | 0 | 0 | 0.00000 |
| HETATM | 347 | Pt | 15.70830 | 27.42058 | 26.39721 | Pt | 0 | 0 | 0.00000 |
| HETATM | 348 | Pt | 15.71674 | 16.24731 | 26.38447 | Pt | 0 | 0 | 0.00000 |
| HETATM | 349 | Pt | 6.05693  | 24.62317 | 26.37203 | Pt | 0 | 0 | 0.00000 |
| HETATM | 350 | Pt | 6.05742  | 13.45644 | 26.37418 | Pt | 0 | 0 | 0.00000 |
| HETATM | 351 | Pt | 15.71546 | 30.21034 | 26.38343 | Pt | 0 | 0 | 0.00000 |
| HETATM | 352 | Pt | 15.72539 | 19.04000 | 26.37420 | Pt | 0 | 0 | 0.00000 |
| HETATM | 353 | Pt | 8.46025  | 17.64375 | 26.37886 | Pt | 0 | 0 | 0.00000 |
| HETATM | 354 | Pt | 8.46584  | 6.47937  | 26.38687 | Pt | 0 | 0 | 0.00000 |
| HETATM | 355 | Pt | 18.12924 | 23.22500 | 26.38233 | Pt | 0 | 0 | 0.00000 |
| HETATM | 356 | Pt | 18.12831 | 12.05682 | 26.38653 | Pt | 0 | 0 | 0.00000 |
| HETATM | 357 | Pt | 8.46118  | 20.43931 | 26.37886 | Pt | 0 | 0 | 0.00000 |
| HETATM | 358 | Pt | 8.47097  | 9.26935  | 26.39721 | Pt | 0 | 0 | 0.00000 |
| HETATM | 359 | Pt | 18.12576 | 26.02342 | 26.38507 | Pt | 0 | 0 | 0.00000 |
| HETATM | 360 | Pt | 18.12851 | 14.85488 | 26.38447 | Pt | 0 | 0 | 0.00000 |
| HETATM | 361 | Pt | 8.46190  | 23.22638 | 26.38500 | Pt | 0 | 0 | 0.00000 |
| HETATM | 362 | Pt | 8.46624  | 12.06060 | 26.39051 | Pt | 0 | 0 | 0.00000 |
| HETATM | 363 | Pt | 18.12796 | 28.81211 | 26.39051 | Pt | 0 | 0 | 0.00000 |
| HETATM | 364 | Pt | 18.13129 | 17.64457 | 26.38891 | Pt | 0 | 0 | 0.00000 |
| HETATM | 365 | Pt | 8.46255  | 26.01648 | 26.38298 | Pt | 0 | 0 | 0.00000 |
| HETATM | 366 | Pt | 8.45984  | 14.85599 | 26.38553 | Pt | 0 | 0 | 0.00000 |
| HETATM | 367 | Pt | 18.13997 | 31.59871 | 26.37759 | Pt | 0 | 0 | 0.00000 |
| HETATM | 368 | Pt | 18.13131 | 20.43573 | 26.38842 | Pt | 0 | 0 | 0.00000 |
| HETATM | 369 | Pt | 10.88204 | 19.04185 | 26.40973 | Pt | 0 | 0 | 0.00000 |
| HETATM | 370 | Pt | 10.88339 | 7.86846  | 26.38291 | Pt | 0 | 0 | 0.00000 |
| HETATM | 371 | Pt | 1.21126  | 13.45793 | 26.41206 | Pt | 0 | 0 | 0.00000 |
| HETATM | 372 | Pt | 1.21280  | 2.29289  | 26.41135 | Pt | 0 | 0 | 0.00000 |
| HETATM | 373 | Pt | 10.87403 | 21.84201 | 26.37203 | Pt | 0 | 0 | 0.00000 |
| HETATM | 374 | Pt | 10.88340 | 10.67044 | 26.38342 | Pt | 0 | 0 | 0.00000 |
| HETATM | 375 | Pt | 1.20312  | 16.25908 | 26.37418 | Pt | 0 | 0 | 0.00000 |
| HETATM | 376 | Pt | 1.20462  | 5.09386  | 26.37420 | Pt | 0 | 0 | 0.00000 |
| HETATM | 377 | Pt | 10.87787 | 24.62199 | 26.38298 | Pt | 0 | 0 | 0.00000 |
| HETATM | 378 | Pt | 10.87350 | 13.46431 | 26.37759 | Pt | 0 | 0 | 0.00000 |
| HETATM | 379 | Pt | 1.21395  | 19.03940 | 26.38553 | Pt | 0 | 0 | 0.00000 |
| HETATM | 380 | Pt | 1.21041  | 7.87532  | 26.38842 | Pt | 0 | 0 | 0.00000 |
| HETATM | 381 | Pt | 10.87448 | 27.40509 | 26.37372 | Pt | 0 | 0 | 0.00000 |
| HETATM | 382 | Pt | 10.87238 | 16.24220 | 26.37134 | Pt | 0 | 0 | 0.00000 |
| HETATM | 383 | Pt | 1.20817  | 21.82183 | 26.37133 | Pt | 0 | 0 | 0.00000 |
| HETATM | 384 | Pt | 1.20472  | 10.65659 | 26.37368 | Pt | 0 | 0 | 0.00000 |
| HETATM | 385 | Pt | 2.01991  | 12.06854 | 28.74581 | Pt | 0 | 0 | 0.00000 |
| HETATM | 386 | Pt | 2.02463  | 23.23530 | 28.74531 | Pt | 0 | 0 | 0.00000 |
| HETATM | 387 | Pt | 11.68825 | 17.65601 | 28.74527 | Pt | 0 | 0 | 0.00000 |
| HETATM | 388 | Pt | 11.66880 | 28.78091 | 28.64045 | Pt | 0 | 0 | 0.00000 |
| HETATM | 389 | Pt | 2.02012  | 14.84486 | 28.74640 | Pt | 0 | 0 | 0.00000 |
| HETATM | 390 | Pt | 2.02277  | 3.68249  | 28.74650 | Pt | 0 | 0 | 0.00000 |
| HETATM | 391 | Pt | 11.68962 | 20.43155 | 28.74503 | Pt | 0 | 0 | 0.00000 |
| HETATM | 392 | Pt | 11.66662 | 9.26779  | 28.73538 | Pt | 0 | 0 | 0.00000 |
| HETATM | 393 | Pt | 2.02615  | 17.65421 | 28.68132 | Pt | 0 | 0 | 0.00000 |

|        |     |    |          |          |          |    |   |   |         |
|--------|-----|----|----------|----------|----------|----|---|---|---------|
| HETATM | 394 | Pt | 2.02388  | 6.49182  | 28.68222 | Pt | 0 | 0 | 0.00000 |
| HETATM | 395 | Pt | 11.68933 | 23.24116 | 28.68032 | Pt | 0 | 0 | 0.00000 |
| HETATM | 396 | Pt | 11.66695 | 12.08446 | 28.64179 | Pt | 0 | 0 | 0.00000 |
| HETATM | 397 | Pt | 2.02848  | 20.42426 | 28.67966 | Pt | 0 | 0 | 0.00000 |
| HETATM | 398 | Pt | 2.02355  | 9.25957  | 28.68223 | Pt | 0 | 0 | 0.00000 |
| HETATM | 399 | Pt | 11.67776 | 26.01117 | 28.66424 | Pt | 0 | 0 | 0.00000 |
| HETATM | 400 | Pt | 11.68358 | 14.84918 | 28.67976 | Pt | 0 | 0 | 0.00000 |
| HETATM | 401 | Pt | 4.42417  | 13.45688 | 28.74640 | Pt | 0 | 0 | 0.00000 |
| HETATM | 402 | Pt | 4.42765  | 24.62427 | 28.74506 | Pt | 0 | 0 | 0.00000 |
| HETATM | 403 | Pt | 14.09403 | 19.04284 | 28.74647 | Pt | 0 | 0 | 0.00000 |
| HETATM | 404 | Pt | 14.10912 | 30.18731 | 28.73538 | Pt | 0 | 0 | 0.00000 |
| HETATM | 405 | Pt | 4.44749  | 16.27322 | 28.64808 | Pt | 0 | 0 | 0.00000 |
| HETATM | 406 | Pt | 4.45093  | 5.10962  | 28.64867 | Pt | 0 | 0 | 0.00000 |
| HETATM | 407 | Pt | 14.11589 | 21.85925 | 28.64867 | Pt | 0 | 0 | 0.00000 |
| HETATM | 408 | Pt | 14.10834 | 10.67661 | 28.73481 | Pt | 0 | 0 | 0.00000 |
| HETATM | 409 | Pt | 4.43902  | 19.04023 | 28.66250 | Pt | 0 | 0 | 0.00000 |
| HETATM | 410 | Pt | 4.44154  | 7.87515  | 28.66592 | Pt | 0 | 0 | 0.00000 |
| HETATM | 411 | Pt | 14.10075 | 24.62722 | 28.66714 | Pt | 0 | 0 | 0.00000 |
| HETATM | 412 | Pt | 14.09363 | 13.46882 | 28.69026 | Pt | 0 | 0 | 0.00000 |
| HETATM | 413 | Pt | 4.44974  | 21.80750 | 28.64650 | Pt | 0 | 0 | 0.00000 |
| HETATM | 414 | Pt | 4.45100  | 10.63998 | 28.65006 | Pt | 0 | 0 | 0.00000 |
| HETATM | 415 | Pt | 14.09069 | 27.39431 | 28.69033 | Pt | 0 | 0 | 0.00000 |
| HETATM | 416 | Pt | 14.11549 | 16.22882 | 28.65058 | Pt | 0 | 0 | 0.00000 |
| HETATM | 417 | Pt | 6.85412  | 14.86678 | 28.68132 | Pt | 0 | 0 | 0.00000 |
| HETATM | 418 | Pt | 6.86098  | 26.02881 | 28.68032 | Pt | 0 | 0 | 0.00000 |
| HETATM | 419 | Pt | 16.52644 | 20.44847 | 28.68223 | Pt | 0 | 0 | 0.00000 |
| HETATM | 420 | Pt | 16.54827 | 31.59593 | 28.64180 | Pt | 0 | 0 | 0.00000 |
| HETATM | 421 | Pt | 6.84802  | 17.64939 | 28.66250 | Pt | 0 | 0 | 0.00000 |
| HETATM | 422 | Pt | 6.85562  | 6.48049  | 28.66714 | Pt | 0 | 0 | 0.00000 |
| HETATM | 423 | Pt | 16.51560 | 23.23389 | 28.66592 | Pt | 0 | 0 | 0.00000 |
| HETATM | 424 | Pt | 16.53381 | 12.05998 | 28.69026 | Pt | 0 | 0 | 0.00000 |
| HETATM | 425 | Pt | 6.84931  | 20.43330 | 28.66212 | Pt | 0 | 0 | 0.00000 |
| HETATM | 426 | Pt | 6.85915  | 9.26456  | 28.67128 | Pt | 0 | 0 | 0.00000 |
| HETATM | 427 | Pt | 16.51007 | 26.02231 | 28.67128 | Pt | 0 | 0 | 0.00000 |
| HETATM | 428 | Pt | 16.51713 | 14.84876 | 28.67079 | Pt | 0 | 0 | 0.00000 |
| HETATM | 429 | Pt | 6.85746  | 23.21587 | 28.67992 | Pt | 0 | 0 | 0.00000 |
| HETATM | 430 | Pt | 6.85629  | 12.05234 | 28.68376 | Pt | 0 | 0 | 0.00000 |
| HETATM | 431 | Pt | 16.53872 | 28.80706 | 28.69131 | Pt | 0 | 0 | 0.00000 |
| HETATM | 432 | Pt | 16.52706 | 17.63449 | 28.68304 | Pt | 0 | 0 | 0.00000 |
| HETATM | 433 | Pt | 9.25189  | 16.25382 | 28.67966 | Pt | 0 | 0 | 0.00000 |
| HETATM | 434 | Pt | 9.26566  | 27.40379 | 28.66424 | Pt | 0 | 0 | 0.00000 |
| HETATM | 435 | Pt | 18.92354 | 21.83206 | 28.68223 | Pt | 0 | 0 | 0.00000 |
| HETATM | 436 | Pt | 18.93427 | 32.99270 | 28.67976 | Pt | 0 | 0 | 0.00000 |
| HETATM | 437 | Pt | 9.23918  |          |          |    |   |   |         |
