# Supplementary material for: Development of a ReaxFF potential for Pt–O systems describing the energetics and dynamics of Pt-oxide formation
Source: Royal Society of Chemistry journal article supplement (doi:10.1039/c4cp03111c), 2014-01-01
Supplement: c4cp03111c1.zip [file c4cp03111c1.zip]

```

XTLGRF 200
DESCRP IS
REMARK Pt111_0.50ML_8x8x7_30.0_vac fcc-displacement
FIXATOMS      1      128
CRYSTX      22.32968      22.32968      43.67409      90.00000      90.00000      60.00000
FORMAT ATOM      (a6,lx,i5,lx,a5,lx,a3,lx,a1,lx,a5,3f10.5,lx,a5,i3,i2,lx,f8.5)
HETATM      1 Pt      2.02016      17.64733      14.95089      Pt      0 0 0.00000
HETATM      2 Pt      2.02016      20.43854      14.95089      Pt      0 0 0.00000
HETATM      3 Pt      2.02016      23.22975      14.95089      Pt      0 0 0.00000
HETATM      4 Pt      2.02016      3.69128      14.95089      Pt      0 0 0.00000
HETATM      5 Pt      2.02016      6.48249      14.95089      Pt      0 0 0.00000
HETATM      6 Pt      2.02016      9.27370      14.95089      Pt      0 0 0.00000
HETATM      7 Pt      2.02016      12.06491      14.95089      Pt      0 0 0.00000
HETATM      8 Pt      2.02016      14.85612      14.95089      Pt      0 0 0.00000
HETATM      9 Pt      6.85468      20.43854      14.95089      Pt      0 0 0.00000
HETATM     10 Pt      6.85468      23.22975      14.95089      Pt      0 0 0.00000
HETATM     11 Pt      6.85468      26.02096      14.95089      Pt      0 0 0.00000
HETATM     12 Pt      6.85468      6.48249      14.95089      Pt      0 0 0.00000
HETATM     13 Pt      6.85468      9.27370      14.95089      Pt      0 0 0.00000
HETATM     14 Pt      6.85468      12.06491      14.95089      Pt      0 0 0.00000
HETATM     15 Pt      6.85468      14.85612      14.95089      Pt      0 0 0.00000
HETATM     16 Pt      6.85468      17.64733      14.95089      Pt      0 0 0.00000
HETATM     17 Pt     11.68920      23.22975      14.95089      Pt      0 0 0.00000
HETATM     18 Pt     11.68920      26.02096      14.95089      Pt      0 0 0.00000
HETATM     19 Pt     11.68920      28.81217      14.95089      Pt      0 0 0.00000
HETATM     20 Pt     11.68920      9.27370      14.95089      Pt      0 0 0.00000
HETATM     21 Pt     11.68920      12.06491      14.95089      Pt      0 0 0.00000
HETATM     22 Pt     11.68920      14.85612      14.95089      Pt      0 0 0.00000
HETATM     23 Pt     11.68920      17.64733      14.95089      Pt      0 0 0.00000
HETATM     24 Pt     11.68920      20.43854      14.95089      Pt      0 0 0.00000
HETATM     25 Pt     16.52371      26.02096      14.95089      Pt      0 0 0.00000
HETATM     26 Pt     16.52371      28.81217      14.95089      Pt      0 0 0.00000
HETATM     27 Pt     16.52371      31.60338      14.95089      Pt      0 0 0.00000
HETATM     28 Pt     16.52371      12.06491      14.95089      Pt      0 0 0.00000
HETATM     29 Pt     16.52371      14.85612      14.95089      Pt      0 0 0.00000
HETATM     30 Pt     16.52371      17.64733      14.95089      Pt      0 0 0.00000
HETATM     31 Pt     16.52371      20.43854      14.95089      Pt      0 0 0.00000
HETATM     32 Pt     16.52371      23.22975      14.95089      Pt      0 0 0.00000
HETATM     33 Pt      4.43742      19.04294      14.95089      Pt      0 0 0.00000
HETATM     34 Pt      4.43742      21.83415      14.95089      Pt      0 0 0.00000
HETATM     35 Pt      4.43742      24.62536      14.95089      Pt      0 0 0.00000
HETATM     36 Pt      4.43742      5.08689      14.95089      Pt      0 0 0.00000
HETATM     37 Pt      4.43742      7.87810      14.95089      Pt      0 0 0.00000
HETATM     38 Pt      4.43742      10.66931      14.95089      Pt      0 0 0.00000
HETATM     39 Pt      4.43742      13.46052      14.95089      Pt      0 0 0.00000
HETATM     40 Pt      4.43742      16.25173      14.95089      Pt      0 0 0.00000
HETATM     41 Pt      9.27194      21.83415      14.95089      Pt      0 0 0.00000
HETATM     42 Pt      9.27194      24.62536      14.95089      Pt      0 0 0.00000
HETATM     43 Pt      9.27194      27.41657      14.95089      Pt      0 0 0.00000
HETATM     44 Pt      9.27194      7.87810      14.95089      Pt      0 0 0.00000
HETATM     45 Pt      9.27194      10.66931      14.95089      Pt      0 0 0.00000
HETATM     46 Pt      9.27194      13.46052      14.95089      Pt      0 0 0.00000
HETATM     47 Pt      9.27194      16.25173      14.95089      Pt      0 0 0.00000
HETATM     48 Pt      9.27194      19.04294      14.95089      Pt      0 0 0.00000
HETATM     49 Pt     14.10646      24.62536      14.95089      Pt      0 0 0.00000
HETATM     50 Pt     14.10646      27.41657      14.95089      Pt      0 0 0.00000
HETATM     51 Pt     14.10646      30.20778      14.95089      Pt      0 0 0.00000
HETATM     52 Pt     14.10646      10.66931      14.95089      Pt      0 0 0.00000
HETATM     53 Pt     14.10646      13.46052      14.95089      Pt      0 0 0.00000
HETATM     54 Pt     14.10646      16.25173      14.95089      Pt      0 0 0.00000
HETATM     55 Pt     14.10646      19.04294      14.95089      Pt      0 0 0.00000
HETATM     56 Pt     14.10646      21.83415      14.95089      Pt      0 0 0.00000
HETATM     57 Pt     18.94097      27.41657      14.95089      Pt      0 0 0.00000

```

|        |     |    |          |          |          |    |   |   |         |
|--------|-----|----|----------|----------|----------|----|---|---|---------|
| HETATM | 58  | Pt | 18.94097 | 30.20778 | 14.95089 | Pt | 0 | 0 | 0.00000 |
| HETATM | 59  | Pt | 18.94097 | 32.99899 | 14.95089 | Pt | 0 | 0 | 0.00000 |
| HETATM | 60  | Pt | 18.94097 | 13.46052 | 14.95089 | Pt | 0 | 0 | 0.00000 |
| HETATM | 61  | Pt | 18.94097 | 16.25173 | 14.95089 | Pt | 0 | 0 | 0.00000 |
| HETATM | 62  | Pt | 18.94097 | 19.04294 | 14.95089 | Pt | 0 | 0 | 0.00000 |
| HETATM | 63  | Pt | 18.94097 | 21.83415 | 14.95089 | Pt | 0 | 0 | 0.00000 |
| HETATM | 64  | Pt | 18.94097 | 24.62536 | 14.95089 | Pt | 0 | 0 | 0.00000 |
| HETATM | 65  | Pt | 2.82591  | 19.04294 | 17.22991 | Pt | 0 | 0 | 0.00000 |
| HETATM | 66  | Pt | 2.82591  | 21.83415 | 17.22991 | Pt | 0 | 0 | 0.00000 |
| HETATM | 67  | Pt | 2.82591  | 2.29568  | 17.22991 | Pt | 0 | 0 | 0.00000 |
| HETATM | 68  | Pt | 2.82591  | 5.08689  | 17.22991 | Pt | 0 | 0 | 0.00000 |
| HETATM | 69  | Pt | 2.82591  | 7.87810  | 17.22991 | Pt | 0 | 0 | 0.00000 |
| HETATM | 70  | Pt | 2.82591  | 10.66931 | 17.22991 | Pt | 0 | 0 | 0.00000 |
| HETATM | 71  | Pt | 2.82591  | 13.46052 | 17.22991 | Pt | 0 | 0 | 0.00000 |
| HETATM | 72  | Pt | 2.82591  | 16.25173 | 17.22991 | Pt | 0 | 0 | 0.00000 |
| HETATM | 73  | Pt | 7.66043  | 21.83415 | 17.22991 | Pt | 0 | 0 | 0.00000 |
| HETATM | 74  | Pt | 7.66043  | 24.62536 | 17.22991 | Pt | 0 | 0 | 0.00000 |
| HETATM | 75  | Pt | 7.66043  | 5.08689  | 17.22991 | Pt | 0 | 0 | 0.00000 |
| HETATM | 76  | Pt | 7.66043  | 7.87810  | 17.22991 | Pt | 0 | 0 | 0.00000 |
| HETATM | 77  | Pt | 7.66043  | 10.66931 | 17.22991 | Pt | 0 | 0 | 0.00000 |
| HETATM | 78  | Pt | 7.66043  | 13.46052 | 17.22991 | Pt | 0 | 0 | 0.00000 |
| HETATM | 79  | Pt | 7.66043  | 16.25173 | 17.22991 | Pt | 0 | 0 | 0.00000 |
| HETATM | 80  | Pt | 7.66043  | 19.04294 | 17.22991 | Pt | 0 | 0 | 0.00000 |
| HETATM | 81  | Pt | 12.49495 | 24.62536 | 17.22991 | Pt | 0 | 0 | 0.00000 |
| HETATM | 82  | Pt | 12.49495 | 27.41657 | 17.22991 | Pt | 0 | 0 | 0.00000 |
| HETATM | 83  | Pt | 12.49495 | 7.87810  | 17.22991 | Pt | 0 | 0 | 0.00000 |
| HETATM | 84  | Pt | 12.49495 | 10.66931 | 17.22991 | Pt | 0 | 0 | 0.00000 |
| HETATM | 85  | Pt | 12.49495 | 13.46052 | 17.22991 | Pt | 0 | 0 | 0.00000 |
| HETATM | 86  | Pt | 12.49495 | 16.25173 | 17.22991 | Pt | 0 | 0 | 0.00000 |
| HETATM | 87  | Pt | 12.49495 | 19.04294 | 17.22991 | Pt | 0 | 0 | 0.00000 |
| HETATM | 88  | Pt | 12.49495 | 21.83415 | 17.22991 | Pt | 0 | 0 | 0.00000 |
| HETATM | 89  | Pt | 17.32946 | 27.41657 | 17.22991 | Pt | 0 | 0 | 0.00000 |
| HETATM | 90  | Pt | 17.32946 | 30.20778 | 17.22991 | Pt | 0 | 0 | 0.00000 |
| HETATM | 91  | Pt | 17.32946 | 10.66931 | 17.22991 | Pt | 0 | 0 | 0.00000 |
| HETATM | 92  | Pt | 17.32946 | 13.46052 | 17.22991 | Pt | 0 | 0 | 0.00000 |
| HETATM | 93  | Pt | 17.32946 | 16.25173 | 17.22991 | Pt | 0 | 0 | 0.00000 |
| HETATM | 94  | Pt | 17.32946 | 19.04294 | 17.22991 | Pt | 0 | 0 | 0.00000 |
| HETATM | 95  | Pt | 17.32946 | 21.83415 | 17.22991 | Pt | 0 | 0 | 0.00000 |
| HETATM | 96  | Pt | 17.32946 | 24.62536 | 17.22991 | Pt | 0 | 0 | 0.00000 |
| HETATM | 97  | Pt | 5.24317  | 20.43854 | 17.22991 | Pt | 0 | 0 | 0.00000 |
| HETATM | 98  | Pt | 5.24317  | 23.22975 | 17.22991 | Pt | 0 | 0 | 0.00000 |
| HETATM | 99  | Pt | 5.24317  | 3.69128  | 17.22991 | Pt | 0 | 0 | 0.00000 |
| HETATM | 100 | Pt | 5.24317  | 6.48249  | 17.22991 | Pt | 0 | 0 | 0.00000 |
| HETATM | 101 | Pt | 5.24317  | 9.27370  | 17.22991 | Pt | 0 | 0 | 0.00000 |
| HETATM | 102 | Pt | 5.24317  | 12.06491 | 17.22991 | Pt | 0 | 0 | 0.00000 |
| HETATM | 103 | Pt | 5.24317  | 14.85612 | 17.22991 | Pt | 0 | 0 | 0.00000 |
| HETATM | 104 | Pt | 5.24317  | 17.64733 | 17.22991 | Pt | 0 | 0 | 0.00000 |
| HETATM | 105 | Pt | 10.07769 | 23.22975 | 17.22991 | Pt | 0 | 0 | 0.00000 |
| HETATM | 106 | Pt | 10.07769 | 26.02096 | 17.22991 | Pt | 0 | 0 | 0.00000 |
| HETATM | 107 | Pt | 10.07769 | 6.48249  | 17.22991 | Pt | 0 | 0 | 0.00000 |
| HETATM | 108 | Pt | 10.07769 | 9.27370  | 17.22991 | Pt | 0 | 0 | 0.00000 |
| HETATM | 109 | Pt | 10.07769 | 12.06491 | 17.22991 | Pt | 0 | 0 | 0.00000 |
| HETATM | 110 | Pt | 10.07769 | 14.85612 | 17.22991 | Pt | 0 | 0 | 0.00000 |
| HETATM | 111 | Pt | 10.07769 | 17.64733 | 17.22991 | Pt | 0 | 0 | 0.00000 |
| HETATM | 112 | Pt | 10.07769 | 20.43854 | 17.22991 | Pt | 0 | 0 | 0.00000 |
| HETATM | 113 | Pt | 14.91221 | 26.02096 | 17.22991 | Pt | 0 | 0 | 0.00000 |
| HETATM | 114 | Pt | 14.91221 | 28.81217 | 17.22991 | Pt | 0 | 0 | 0.00000 |
| HETATM | 115 | Pt | 14.91221 | 9.27370  | 17.22991 | Pt | 0 | 0 | 0.00000 |
| HETATM | 116 | Pt | 14.91221 | 12.06491 | 17.22991 | Pt | 0 | 0 | 0.00000 |
| HETATM | 117 | Pt | 14.91221 | 14.85612 | 17.22991 | Pt | 0 | 0 | 0.00000 |
| HETATM | 118 | Pt | 14.91221 | 17.64733 | 17.22991 | Pt | 0 | 0 | 0.00000 |
| HETATM | 119 | Pt | 14.91221 | 20.43854 | 17.22991 | Pt | 0 | 0 | 0.00000 |
| HETATM | 120 | Pt | 14.91221 | 23.22975 | 17.22991 | Pt | 0 | 0 | 0.00000 |

|        |     |    |          |          |          |    |   |   |         |
|--------|-----|----|----------|----------|----------|----|---|---|---------|
| HETATM | 121 | Pt | 0.40865  | 17.64733 | 17.22991 | Pt | 0 | 0 | 0.00000 |
| HETATM | 122 | Pt | 0.40865  | 20.43854 | 17.22991 | Pt | 0 | 0 | 0.00000 |
| HETATM | 123 | Pt | 0.40865  | 0.90007  | 17.22991 | Pt | 0 | 0 | 0.00000 |
| HETATM | 124 | Pt | 0.40865  | 3.69128  | 17.22991 | Pt | 0 | 0 | 0.00000 |
| HETATM | 125 | Pt | 0.40865  | 6.48249  | 17.22991 | Pt | 0 | 0 | 0.00000 |
| HETATM | 126 | Pt | 0.40865  | 9.27370  | 17.22991 | Pt | 0 | 0 | 0.00000 |
| HETATM | 127 | Pt | 0.40865  | 12.06491 | 17.22991 | Pt | 0 | 0 | 0.00000 |
| HETATM | 128 | Pt | 0.40865  | 14.85612 | 17.22991 | Pt | 0 | 0 | 0.00000 |
| HETATM | 129 | Pt | 3.63026  | 20.43830 | 19.50908 | Pt | 0 | 0 | 0.00000 |
| HETATM | 130 | Pt | 3.63168  | 23.22953 | 19.50738 | Pt | 0 | 0 | 0.00000 |
| HETATM | 131 | Pt | 3.63168  | 3.69150  | 19.50738 | Pt | 0 | 0 | 0.00000 |
| HETATM | 132 | Pt | 3.63026  | 6.48274  | 19.50908 | Pt | 0 | 0 | 0.00000 |
| HETATM | 133 | Pt | 3.63030  | 9.27383  | 19.50907 | Pt | 0 | 0 | 0.00000 |
| HETATM | 134 | Pt | 3.63133  | 12.06501 | 19.50813 | Pt | 0 | 0 | 0.00000 |
| HETATM | 135 | Pt | 3.63133  | 14.85603 | 19.50813 | Pt | 0 | 0 | 0.00000 |
| HETATM | 136 | Pt | 3.63030  | 17.64720 | 19.50906 | Pt | 0 | 0 | 0.00000 |
| HETATM | 137 | Pt | 8.46548  | 23.22980 | 19.50842 | Pt | 0 | 0 | 0.00000 |
| HETATM | 138 | Pt | 8.46548  | 26.02091 | 19.50842 | Pt | 0 | 0 | 0.00000 |
| HETATM | 139 | Pt | 8.46392  | 6.48188  | 19.50884 | Pt | 0 | 0 | 0.00000 |
| HETATM | 140 | Pt | 8.46321  | 9.27222  | 19.50820 | Pt | 0 | 0 | 0.00000 |
| HETATM | 141 | Pt | 8.46404  | 12.06419 | 19.50786 | Pt | 0 | 0 | 0.00000 |
| HETATM | 142 | Pt | 8.46404  | 14.85685 | 19.50786 | Pt | 0 | 0 | 0.00000 |
| HETATM | 143 | Pt | 8.46321  | 17.64882 | 19.50820 | Pt | 0 | 0 | 0.00000 |
| HETATM | 144 | Pt | 8.46392  | 20.43916 | 19.50884 | Pt | 0 | 0 | 0.00000 |
| HETATM | 145 | Pt | 13.29930 | 26.02159 | 19.50674 | Pt | 0 | 0 | 0.00000 |
| HETATM | 146 | Pt | 13.29842 | 28.81288 | 19.50890 | Pt | 0 | 0 | 0.00000 |
| HETATM | 147 | Pt | 13.29787 | 9.27276  | 19.50823 | Pt | 0 | 0 | 0.00000 |
| HETATM | 148 | Pt | 13.29921 | 12.06378 | 19.50317 | Pt | 0 | 0 | 0.00000 |
| HETATM | 149 | Pt | 13.29921 | 14.85726 | 19.50317 | Pt | 0 | 0 | 0.00000 |
| HETATM | 150 | Pt | 13.29787 | 17.64828 | 19.50823 | Pt | 0 | 0 | 0.00000 |
| HETATM | 151 | Pt | 13.29842 | 20.43784 | 19.50890 | Pt | 0 | 0 | 0.00000 |
| HETATM | 152 | Pt | 13.29930 | 23.22913 | 19.50674 | Pt | 0 | 0 | 0.00000 |
| HETATM | 153 | Pt | 18.13339 | 28.81246 | 19.50763 | Pt | 0 | 0 | 0.00000 |
| HETATM | 154 | Pt | 18.13294 | 31.60302 | 19.50804 | Pt | 0 | 0 | 0.00000 |
| HETATM | 155 | Pt | 18.13559 | 12.06452 | 19.50469 | Pt | 0 | 0 | 0.00000 |
| HETATM | 156 | Pt | 18.13559 | 14.85652 | 19.50469 | Pt | 0 | 0 | 0.00000 |
| HETATM | 157 | Pt | 18.13294 | 17.64769 | 19.50804 | Pt | 0 | 0 | 0.00000 |
| HETATM | 158 | Pt | 18.13339 | 20.43825 | 19.50763 | Pt | 0 | 0 | 0.00000 |
| HETATM | 159 | Pt | 18.13456 | 23.22944 | 19.50588 | Pt | 0 | 0 | 0.00000 |
| HETATM | 160 | Pt | 18.13456 | 26.02127 | 19.50588 | Pt | 0 | 0 | 0.00000 |
| HETATM | 161 | Pt | 6.04854  | 21.83420 | 19.51038 | Pt | 0 | 0 | 0.00000 |
| HETATM | 162 | Pt | 6.04971  | 24.62536 | 19.50958 | Pt | 0 | 0 | 0.00000 |
| HETATM | 163 | Pt | 6.04854  | 5.08683  | 19.51038 | Pt | 0 | 0 | 0.00000 |
| HETATM | 164 | Pt | 6.04757  | 7.87802  | 19.51119 | Pt | 0 | 0 | 0.00000 |
| HETATM | 165 | Pt | 6.04865  | 10.66942 | 19.51141 | Pt | 0 | 0 | 0.00000 |
| HETATM | 166 | Pt | 6.04924  | 13.46052 | 19.51162 | Pt | 0 | 0 | 0.00000 |
| HETATM | 167 | Pt | 6.04865  | 16.25162 | 19.51141 | Pt | 0 | 0 | 0.00000 |
| HETATM | 168 | Pt | 6.04757  | 19.04301 | 19.51119 | Pt | 0 | 0 | 0.00000 |
| HETATM | 169 | Pt | 10.88357 | 24.62536 | 19.50980 | Pt | 0 | 0 | 0.00000 |
| HETATM | 170 | Pt | 10.88274 | 27.41683 | 19.51019 | Pt | 0 | 0 | 0.00000 |
| HETATM | 171 | Pt | 10.88127 | 7.87708  | 19.51001 | Pt | 0 | 0 | 0.00000 |
| HETATM | 172 | Pt | 10.88110 | 10.66728 | 19.50700 | Pt | 0 | 0 | 0.00000 |
| HETATM | 173 | Pt | 10.88172 | 13.46052 | 19.50501 | Pt | 0 | 0 | 0.00000 |
| HETATM | 174 | Pt | 10.88110 | 16.25375 | 19.50700 | Pt | 0 | 0 | 0.00000 |
| HETATM | 175 | Pt | 10.88127 | 19.04395 | 19.51001 | Pt | 0 | 0 | 0.00000 |
| HETATM | 176 | Pt | 10.88274 | 21.83388 | 19.51019 | Pt | 0 | 0 | 0.00000 |
| HETATM | 177 | Pt | 15.71685 | 27.41696 | 19.50758 | Pt | 0 | 0 | 0.00000 |
| HETATM | 178 | Pt | 15.71568 | 30.20779 | 19.50977 | Pt | 0 | 0 | 0.00000 |
| HETATM | 179 | Pt | 15.71676 | 10.66853 | 19.50710 | Pt | 0 | 0 | 0.00000 |
| HETATM | 180 | Pt | 15.71880 | 13.46052 | 19.50291 | Pt | 0 | 0 | 0.00000 |
| HETATM | 181 | Pt | 15.71676 | 16.25250 | 19.50710 | Pt | 0 | 0 | 0.00000 |
| HETATM | 182 | Pt | 15.71568 | 19.04292 | 19.50977 | Pt | 0 | 0 | 0.00000 |
| HETATM | 183 | Pt | 15.71685 | 21.83376 | 19.50758 | Pt | 0 | 0 | 0.00000 |

|        |     |    |          |          |          |    |   |   |         |
|--------|-----|----|----------|----------|----------|----|---|---|---------|
| HETATM | 184 | Pt | 15.71761 | 24.62536 | 19.50631 | Pt | 0 | 0 | 0.00000 |
| HETATM | 185 | Pt | 1.21326  | 19.04294 | 19.51009 | Pt | 0 | 0 | 0.00000 |
| HETATM | 186 | Pt | 1.21434  | 21.83359 | 19.50872 | Pt | 0 | 0 | 0.00000 |
| HETATM | 187 | Pt | 1.21584  | 2.29568  | 19.50701 | Pt | 0 | 0 | 0.00000 |
| HETATM | 188 | Pt | 1.21434  | 5.08744  | 19.50872 | Pt | 0 | 0 | 0.00000 |
| HETATM | 189 | Pt | 1.21326  | 7.87810  | 19.51009 | Pt | 0 | 0 | 0.00000 |
| HETATM | 190 | Pt | 1.21420  | 10.66904 | 19.50873 | Pt | 0 | 0 | 0.00000 |
| HETATM | 191 | Pt | 1.21473  | 13.46052 | 19.50766 | Pt | 0 | 0 | 0.00000 |
| HETATM | 192 | Pt | 1.21420  | 16.25200 | 19.50873 | Pt | 0 | 0 | 0.00000 |
| HETATM | 193 | Pt | 2.01780  | 17.64758 | 21.79091 | Pt | 0 | 0 | 0.00000 |
| HETATM | 194 | Pt | 2.01795  | 20.43815 | 21.79131 | Pt | 0 | 0 | 0.00000 |
| HETATM | 195 | Pt | 2.02104  | 23.22904 | 21.78674 | Pt | 0 | 0 | 0.00000 |
| HETATM | 196 | Pt | 2.02104  | 3.69200  | 21.78674 | Pt | 0 | 0 | 0.00000 |
| HETATM | 197 | Pt | 2.01795  | 6.48289  | 21.79131 | Pt | 0 | 0 | 0.00000 |
| HETATM | 198 | Pt | 2.01780  | 9.27345  | 21.79091 | Pt | 0 | 0 | 0.00000 |
| HETATM | 199 | Pt | 2.01969  | 12.06506 | 21.78760 | Pt | 0 | 0 | 0.00000 |
| HETATM | 200 | Pt | 2.01969  | 14.85598 | 21.78760 | Pt | 0 | 0 | 0.00000 |
| HETATM | 201 | Pt | 6.85239  | 20.43837 | 21.79303 | Pt | 0 | 0 | 0.00000 |
| HETATM | 202 | Pt | 6.85552  | 23.22944 | 21.79140 | Pt | 0 | 0 | 0.00000 |
| HETATM | 203 | Pt | 6.85552  | 26.02127 | 21.79140 | Pt | 0 | 0 | 0.00000 |
| HETATM | 204 | Pt | 6.85239  | 6.48266  | 21.79303 | Pt | 0 | 0 | 0.00000 |
| HETATM | 205 | Pt | 6.85241  | 9.27362  | 21.79424 | Pt | 0 | 0 | 0.00000 |
| HETATM | 206 | Pt | 6.85520  | 12.06514 | 21.79574 | Pt | 0 | 0 | 0.00000 |
| HETATM | 207 | Pt | 6.85520  | 14.85589 | 21.79574 | Pt | 0 | 0 | 0.00000 |
| HETATM | 208 | Pt | 6.85241  | 17.64741 | 21.79424 | Pt | 0 | 0 | 0.00000 |
| HETATM | 209 | Pt | 11.68983 | 23.22811 | 21.79007 | Pt | 0 | 0 | 0.00000 |
| HETATM | 210 | Pt | 11.68983 | 26.02260 | 21.79007 | Pt | 0 | 0 | 0.00000 |
| HETATM | 211 | Pt | 11.68756 | 28.81371 | 21.79314 | Pt | 0 | 0 | 0.00000 |
| HETATM | 212 | Pt | 11.68472 | 9.27139  | 21.79017 | Pt | 0 | 0 | 0.00000 |
| HETATM | 213 | Pt | 11.68693 | 12.06229 | 21.77763 | Pt | 0 | 0 | 0.00000 |
| HETATM | 214 | Pt | 11.68693 | 14.85875 | 21.77763 | Pt | 0 | 0 | 0.00000 |
| HETATM | 215 | Pt | 11.68472 | 17.64965 | 21.79017 | Pt | 0 | 0 | 0.00000 |
| HETATM | 216 | Pt | 11.68756 | 20.43700 | 21.79314 | Pt | 0 | 0 | 0.00000 |
| HETATM | 217 | Pt | 16.52322 | 26.02152 | 21.78366 | Pt | 0 | 0 | 0.00000 |
| HETATM | 218 | Pt | 16.52014 | 28.81248 | 21.78798 | Pt | 0 | 0 | 0.00000 |
| HETATM | 219 | Pt | 16.51866 | 31.60337 | 21.78982 | Pt | 0 | 0 | 0.00000 |
| HETATM | 220 | Pt | 16.52499 | 12.06495 | 21.77907 | Pt | 0 | 0 | 0.00000 |
| HETATM | 221 | Pt | 16.52499 | 14.85608 | 21.77907 | Pt | 0 | 0 | 0.00000 |
| HETATM | 222 | Pt | 16.51866 | 17.64734 | 21.78982 | Pt | 0 | 0 | 0.00000 |
| HETATM | 223 | Pt | 16.52014 | 20.43824 | 21.78798 | Pt | 0 | 0 | 0.00000 |
| HETATM | 224 | Pt | 16.52322 | 23.22919 | 21.78366 | Pt | 0 | 0 | 0.00000 |
| HETATM | 225 | Pt | 4.43323  | 19.04243 | 21.78778 | Pt | 0 | 0 | 0.00000 |
| HETATM | 226 | Pt | 4.43511  | 21.83389 | 21.78597 | Pt | 0 | 0 | 0.00000 |
| HETATM | 227 | Pt | 4.43746  | 24.62536 | 21.78318 | Pt | 0 | 0 | 0.00000 |
| HETATM | 228 | Pt | 4.43511  | 5.08714  | 21.78597 | Pt | 0 | 0 | 0.00000 |
| HETATM | 229 | Pt | 4.43323  | 7.87861  | 21.78778 | Pt | 0 | 0 | 0.00000 |
| HETATM | 230 | Pt | 4.43528  | 10.67001 | 21.78643 | Pt | 0 | 0 | 0.00000 |
| HETATM | 231 | Pt | 4.43627  | 13.46052 | 21.78638 | Pt | 0 | 0 | 0.00000 |
| HETATM | 232 | Pt | 4.43528  | 16.25102 | 21.78643 | Pt | 0 | 0 | 0.00000 |
| HETATM | 233 | Pt | 9.26971  | 21.83350 | 21.78587 | Pt | 0 | 0 | 0.00000 |
| HETATM | 234 | Pt | 9.27132  | 24.62536 | 21.78495 | Pt | 0 | 0 | 0.00000 |
| HETATM | 235 | Pt | 9.26971  | 27.41722 | 21.78587 | Pt | 0 | 0 | 0.00000 |
| HETATM | 236 | Pt | 9.26676  | 7.87664  | 21.78658 | Pt | 0 | 0 | 0.00000 |
| HETATM | 237 | Pt | 9.26636  | 10.66560 | 21.78239 | Pt | 0 | 0 | 0.00000 |
| HETATM | 238 | Pt | 9.26846  | 13.46052 | 21.78016 | Pt | 0 | 0 | 0.00000 |
| HETATM | 239 | Pt | 9.26636  | 16.25543 | 21.78239 | Pt | 0 | 0 | 0.00000 |
| HETATM | 240 | Pt | 9.26676  | 19.04439 | 21.78658 | Pt | 0 | 0 | 0.00000 |
| HETATM | 241 | Pt | 14.10439 | 24.62536 | 21.77873 | Pt | 0 | 0 | 0.00000 |
| HETATM | 242 | Pt | 14.10378 | 27.41886 | 21.78310 | Pt | 0 | 0 | 0.00000 |
| HETATM | 243 | Pt | 14.10157 | 30.20895 | 21.78926 | Pt | 0 | 0 | 0.00000 |
| HETATM | 244 | Pt | 14.10270 | 10.66750 | 21.78123 | Pt | 0 | 0 | 0.00000 |
| HETATM | 245 | Pt | 14.10716 | 13.46052 | 21.76920 | Pt | 0 | 0 | 0.00000 |
| HETATM | 246 | Pt | 14.10270 | 16.25354 | 21.78123 | Pt | 0 | 0 | 0.00000 |

|        |     |    |          |          |          |    |   |   |         |
|--------|-----|----|----------|----------|----------|----|---|---|---------|
| HETATM | 247 | Pt | 14.10157 | 19.04177 | 21.78926 | Pt | 0 | 0 | 0.00000 |
| HETATM | 248 | Pt | 14.10378 | 21.83186 | 21.78310 | Pt | 0 | 0 | 0.00000 |
| HETATM | 249 | Pt | 18.93881 | 27.41749 | 21.78265 | Pt | 0 | 0 | 0.00000 |
| HETATM | 250 | Pt | 18.93610 | 30.20795 | 21.78587 | Pt | 0 | 0 | 0.00000 |
| HETATM | 251 | Pt | 18.93842 | 32.99801 | 21.78238 | Pt | 0 | 0 | 0.00000 |
| HETATM | 252 | Pt | 18.94255 | 13.46052 | 21.77809 | Pt | 0 | 0 | 0.00000 |
| HETATM | 253 | Pt | 18.93842 | 16.25270 | 21.78238 | Pt | 0 | 0 | 0.00000 |
| HETATM | 254 | Pt | 18.93610 | 19.04276 | 21.78587 | Pt | 0 | 0 | 0.00000 |
| HETATM | 255 | Pt | 18.93881 | 21.83322 | 21.78265 | Pt | 0 | 0 | 0.00000 |
| HETATM | 256 | Pt | 18.93958 | 24.62536 | 21.78000 | Pt | 0 | 0 | 0.00000 |
| HETATM | 257 | Pt | 2.82377  | 19.04292 | 24.07566 | Pt | 0 | 0 | 0.00000 |
| HETATM | 258 | Pt | 2.82699  | 21.83332 | 24.07212 | Pt | 0 | 0 | 0.00000 |
| HETATM | 259 | Pt | 2.83116  | 2.29568  | 24.06425 | Pt | 0 | 0 | 0.00000 |
| HETATM | 260 | Pt | 2.82699  | 5.08771  | 24.07212 | Pt | 0 | 0 | 0.00000 |
| HETATM | 261 | Pt | 2.82377  | 7.87812  | 24.07566 | Pt | 0 | 0 | 0.00000 |
| HETATM | 262 | Pt | 2.82729  | 10.67000 | 24.06915 | Pt | 0 | 0 | 0.00000 |
| HETATM | 263 | Pt | 2.82860  | 13.46052 | 24.06903 | Pt | 0 | 0 | 0.00000 |
| HETATM | 264 | Pt | 2.82729  | 16.25103 | 24.06915 | Pt | 0 | 0 | 0.00000 |
| HETATM | 265 | Pt | 7.66581  | 21.83141 | 24.07483 | Pt | 0 | 0 | 0.00000 |
| HETATM | 266 | Pt | 7.66664  | 24.62536 | 24.07328 | Pt | 0 | 0 | 0.00000 |
| HETATM | 267 | Pt | 7.66581  | 5.08962  | 24.07483 | Pt | 0 | 0 | 0.00000 |
| HETATM | 268 | Pt | 7.66162  | 7.87820  | 24.07766 | Pt | 0 | 0 | 0.00000 |
| HETATM | 269 | Pt | 7.66395  | 10.66896 | 24.08109 | Pt | 0 | 0 | 0.00000 |
| HETATM | 270 | Pt | 7.67126  | 13.46052 | 24.08295 | Pt | 0 | 0 | 0.00000 |
| HETATM | 271 | Pt | 7.66395  | 16.25208 | 24.08109 | Pt | 0 | 0 | 0.00000 |
| HETATM | 272 | Pt | 7.66162  | 19.04284 | 24.07766 | Pt | 0 | 0 | 0.00000 |
| HETATM | 273 | Pt | 12.50023 | 24.62536 | 24.06606 | Pt | 0 | 0 | 0.00000 |
| HETATM | 274 | Pt | 12.50276 | 27.42441 | 24.07356 | Pt | 0 | 0 | 0.00000 |
| HETATM | 275 | Pt | 12.49721 | 7.88271  | 24.08191 | Pt | 0 | 0 | 0.00000 |
| HETATM | 276 | Pt | 12.49339 | 10.66613 | 24.06248 | Pt | 0 | 0 | 0.00000 |
| HETATM | 277 | Pt | 12.50381 | 13.46052 | 24.03540 | Pt | 0 | 0 | 0.00000 |
| HETATM | 278 | Pt | 12.49339 | 16.25490 | 24.06248 | Pt | 0 | 0 | 0.00000 |
| HETATM | 279 | Pt | 12.49721 | 19.03833 | 24.08191 | Pt | 0 | 0 | 0.00000 |
| HETATM | 280 | Pt | 12.50276 | 21.82631 | 24.07356 | Pt | 0 | 0 | 0.00000 |
| HETATM | 281 | Pt | 17.33274 | 27.41856 | 24.06409 | Pt | 0 | 0 | 0.00000 |
| HETATM | 282 | Pt | 17.32358 | 30.20717 | 24.06904 | Pt | 0 | 0 | 0.00000 |
| HETATM | 283 | Pt | 17.32666 | 10.67109 | 24.06213 | Pt | 0 | 0 | 0.00000 |
| HETATM | 284 | Pt | 17.33908 | 13.46052 | 24.05416 | Pt | 0 | 0 | 0.00000 |
| HETATM | 285 | Pt | 17.32666 | 16.24995 | 24.06213 | Pt | 0 | 0 | 0.00000 |
| HETATM | 286 | Pt | 17.32358 | 19.04354 | 24.06904 | Pt | 0 | 0 | 0.00000 |
| HETATM | 287 | Pt | 17.33274 | 21.83215 | 24.06409 | Pt | 0 | 0 | 0.00000 |
| HETATM | 288 | Pt | 17.33203 | 24.62536 | 24.05973 | Pt | 0 | 0 | 0.00000 |
| HETATM | 289 | Pt | 5.23201  | 20.43768 | 24.06425 | Pt | 0 | 0 | 0.00000 |
| HETATM | 290 | Pt | 5.23755  | 23.22989 | 24.06069 | Pt | 0 | 0 | 0.00000 |
| HETATM | 291 | Pt | 5.23755  | 3.69114  | 24.06069 | Pt | 0 | 0 | 0.00000 |
| HETATM | 292 | Pt | 5.23201  | 6.48335  | 24.06425 | Pt | 0 | 0 | 0.00000 |
| HETATM | 293 | Pt | 5.23356  | 9.27492  | 24.06451 | Pt | 0 | 0 | 0.00000 |
| HETATM | 294 | Pt | 5.23690  | 12.06561 | 24.06545 | Pt | 0 | 0 | 0.00000 |
| HETATM | 295 | Pt | 5.23690  | 14.85543 | 24.06545 | Pt | 0 | 0 | 0.00000 |
| HETATM | 296 | Pt | 5.23356  | 17.64612 | 24.06451 | Pt | 0 | 0 | 0.00000 |
| HETATM | 297 | Pt | 10.07237 | 23.22788 | 24.05913 | Pt | 0 | 0 | 0.00000 |
| HETATM | 298 | Pt | 10.07237 | 26.02283 | 24.05913 | Pt | 0 | 0 | 0.00000 |
| HETATM | 299 | Pt | 10.06983 | 6.48514  | 24.06396 | Pt | 0 | 0 | 0.00000 |
| HETATM | 300 | Pt | 10.06503 | 9.27158  | 24.06403 | Pt | 0 | 0 | 0.00000 |
| HETATM | 301 | Pt | 10.06737 | 12.05798 | 24.04349 | Pt | 0 | 0 | 0.00000 |
| HETATM | 302 | Pt | 10.06737 | 14.86306 | 24.04349 | Pt | 0 | 0 | 0.00000 |
| HETATM | 303 | Pt | 10.06503 | 17.64945 | 24.06403 | Pt | 0 | 0 | 0.00000 |
| HETATM | 304 | Pt | 10.06983 | 20.43590 | 24.06396 | Pt | 0 | 0 | 0.00000 |
| HETATM | 305 | Pt | 14.90414 | 26.02232 | 24.04948 | Pt | 0 | 0 | 0.00000 |
| HETATM | 306 | Pt | 14.90294 | 28.81647 | 24.06506 | Pt | 0 | 0 | 0.00000 |
| HETATM | 307 | Pt | 14.89911 | 9.27481  | 24.07155 | Pt | 0 | 0 | 0.00000 |
| HETATM | 308 | Pt | 14.90992 | 12.06330 | 24.04174 | Pt | 0 | 0 | 0.00000 |
| HETATM | 309 | Pt | 14.90992 | 14.85774 | 24.04174 | Pt | 0 | 0 | 0.00000 |

|        |     |    |          |          |          |    |   |   |         |
|--------|-----|----|----------|----------|----------|----|---|---|---------|
| HETATM | 310 | Pt | 14.89911 | 17.64623 | 24.07155 | Pt | 0 | 0 | 0.00000 |
| HETATM | 311 | Pt | 14.90294 | 20.43424 | 24.06506 | Pt | 0 | 0 | 0.00000 |
| HETATM | 312 | Pt | 14.90414 | 23.22839 | 24.04948 | Pt | 0 | 0 | 0.00000 |
| HETATM | 313 | Pt | 0.39812  | 17.64963 | 24.06365 | Pt | 0 | 0 | 0.00000 |
| HETATM | 314 | Pt | 0.39807  | 20.43820 | 24.06295 | Pt | 0 | 0 | 0.00000 |
| HETATM | 315 | Pt | 0.40363  | 0.89760  | 24.05432 | Pt | 0 | 0 | 0.00000 |
| HETATM | 316 | Pt | 0.40363  | 3.69376  | 24.05432 | Pt | 0 | 0 | 0.00000 |
| HETATM | 317 | Pt | 0.39807  | 6.48284  | 24.06295 | Pt | 0 | 0 | 0.00000 |
| HETATM | 318 | Pt | 0.39812  | 9.27141  | 24.06365 | Pt | 0 | 0 | 0.00000 |
| HETATM | 319 | Pt | 0.40054  | 12.06510 | 24.05592 | Pt | 0 | 0 | 0.00000 |
| HETATM | 320 | Pt | 0.40054  | 14.85593 | 24.05592 | Pt | 0 | 0 | 0.00000 |
| HETATM | 321 | Pt | 3.60735  | 20.43815 | 26.38823 | Pt | 0 | 0 | 0.00000 |
| HETATM | 322 | Pt | 3.61463  | 23.22841 | 26.37474 | Pt | 0 | 0 | 0.00000 |
| HETATM | 323 | Pt | 3.61463  | 3.69262  | 26.37474 | Pt | 0 | 0 | 0.00000 |
| HETATM | 324 | Pt | 3.60735  | 6.48289  | 26.38823 | Pt | 0 | 0 | 0.00000 |
| HETATM | 325 | Pt | 3.60990  | 9.27347  | 26.37975 | Pt | 0 | 0 | 0.00000 |
| HETATM | 326 | Pt | 3.61258  | 12.06500 | 26.38066 | Pt | 0 | 0 | 0.00000 |
| HETATM | 327 | Pt | 3.61258  | 14.85604 | 26.38066 | Pt | 0 | 0 | 0.00000 |
| HETATM | 328 | Pt | 3.60990  | 17.64756 | 26.37975 | Pt | 0 | 0 | 0.00000 |
| HETATM | 329 | Pt | 8.45236  | 23.22606 | 26.38489 | Pt | 0 | 0 | 0.00000 |
| HETATM | 330 | Pt | 8.45236  | 26.02465 | 26.38489 | Pt | 0 | 0 | 0.00000 |
| HETATM | 331 | Pt | 8.46044  | 6.49149  | 26.39578 | Pt | 0 | 0 | 0.00000 |
| HETATM | 332 | Pt | 8.44742  | 9.26818  | 26.40055 | Pt | 0 | 0 | 0.00000 |
| HETATM | 333 | Pt | 8.46979  | 12.05796 | 26.40434 | Pt | 0 | 0 | 0.00000 |
| HETATM | 334 | Pt | 8.46979  | 14.86308 | 26.40434 | Pt | 0 | 0 | 0.00000 |
| HETATM | 335 | Pt | 8.44742  | 17.65285 | 26.40055 | Pt | 0 | 0 | 0.00000 |
| HETATM | 336 | Pt | 8.46044  | 20.42955 | 26.39578 | Pt | 0 | 0 | 0.00000 |
| HETATM | 337 | Pt | 13.28383 | 26.02770 | 26.37256 | Pt | 0 | 0 | 0.00000 |
| HETATM | 338 | Pt | 13.29823 | 28.84482 | 26.40720 | Pt | 0 | 0 | 0.00000 |
| HETATM | 339 | Pt | 13.27746 | 9.29547  | 26.41259 | Pt | 0 | 0 | 0.00000 |
| HETATM | 340 | Pt | 13.29879 | 12.05884 | 26.33159 | Pt | 0 | 0 | 0.00000 |
| HETATM | 341 | Pt | 13.29879 | 14.86220 | 26.33159 | Pt | 0 | 0 | 0.00000 |
| HETATM | 342 | Pt | 13.27746 | 17.62556 | 26.41259 | Pt | 0 | 0 | 0.00000 |
| HETATM | 343 | Pt | 13.29823 | 20.40589 | 26.40720 | Pt | 0 | 0 | 0.00000 |
| HETATM | 344 | Pt | 13.28383 | 23.22301 | 26.37256 | Pt | 0 | 0 | 0.00000 |
| HETATM | 345 | Pt | 18.11454 | 28.82572 | 26.38257 | Pt | 0 | 0 | 0.00000 |
| HETATM | 346 | Pt | 18.10101 | 31.60755 | 26.35790 | Pt | 0 | 0 | 0.00000 |
| HETATM | 347 | Pt | 18.12470 | 12.05862 | 26.36252 | Pt | 0 | 0 | 0.00000 |
| HETATM | 348 | Pt | 18.12470 | 14.86242 | 26.36252 | Pt | 0 | 0 | 0.00000 |
| HETATM | 349 | Pt | 18.10101 | 17.64317 | 26.35790 | Pt | 0 | 0 | 0.00000 |
| HETATM | 350 | Pt | 18.11454 | 20.42500 | 26.38257 | Pt | 0 | 0 | 0.00000 |
| HETATM | 351 | Pt | 18.11324 | 23.22815 | 26.36790 | Pt | 0 | 0 | 0.00000 |
| HETATM | 352 | Pt | 18.11324 | 26.02257 | 26.36790 | Pt | 0 | 0 | 0.00000 |
| HETATM | 353 | Pt | 6.05530  | 21.83389 | 26.30948 | Pt | 0 | 0 | 0.00000 |
| HETATM | 354 | Pt | 6.05769  | 24.62536 | 26.31495 | Pt | 0 | 0 | 0.00000 |
| HETATM | 355 | Pt | 6.05530  | 5.08714  | 26.30948 | Pt | 0 | 0 | 0.00000 |
| HETATM | 356 | Pt | 6.05056  | 7.87906  | 26.31482 | Pt | 0 | 0 | 0.00000 |
| HETATM | 357 | Pt | 6.05578  | 10.66864 | 26.31917 | Pt | 0 | 0 | 0.00000 |
| HETATM | 358 | Pt | 6.06406  | 13.46052 | 26.31598 | Pt | 0 | 0 | 0.00000 |
| HETATM | 359 | Pt | 6.05578  | 16.25240 | 26.31917 | Pt | 0 | 0 | 0.00000 |
| HETATM | 360 | Pt | 6.05056  | 19.04197 | 26.31482 | Pt | 0 | 0 | 0.00000 |
| HETATM | 361 | Pt | 10.89017 | 24.62536 | 26.30242 | Pt | 0 | 0 | 0.00000 |
| HETATM | 362 | Pt | 10.89749 | 27.41903 | 26.30410 | Pt | 0 | 0 | 0.00000 |
| HETATM | 363 | Pt | 10.88753 | 7.88630  | 26.31822 | Pt | 0 | 0 | 0.00000 |
| HETATM | 364 | Pt | 10.88313 | 10.67324 | 26.30932 | Pt | 0 | 0 | 0.00000 |
| HETATM | 365 | Pt | 10.88966 | 13.46052 | 26.24059 | Pt | 0 | 0 | 0.00000 |
| HETATM | 366 | Pt | 10.88313 | 16.24779 | 26.30932 | Pt | 0 | 0 | 0.00000 |
| HETATM | 367 | Pt | 10.88753 | 19.03473 | 26.31822 | Pt | 0 | 0 | 0.00000 |
| HETATM | 368 | Pt | 10.89749 | 21.83169 | 26.30410 | Pt | 0 | 0 | 0.00000 |
| HETATM | 369 | Pt | 15.72315 | 27.41266 | 26.29666 | Pt | 0 | 0 | 0.00000 |
| HETATM | 370 | Pt | 15.71493 | 30.21072 | 26.33359 | Pt | 0 | 0 | 0.00000 |
| HETATM | 371 | Pt | 15.71136 | 10.66945 | 26.31895 | Pt | 0 | 0 | 0.00000 |
| HETATM | 372 | Pt | 15.72852 | 13.46052 | 26.27973 | Pt | 0 | 0 | 0.00000 |

|        |     |    |          |          |          |    |   |   |         |
|--------|-----|----|----------|----------|----------|----|---|---|---------|
| HETATM | 373 | Pt | 15.71136 | 16.25159 | 26.31895 | Pt | 0 | 0 | 0.00000 |
| HETATM | 374 | Pt | 15.71493 | 19.03999 | 26.33359 | Pt | 0 | 0 | 0.00000 |
| HETATM | 375 | Pt | 15.72315 | 21.83806 | 26.29666 | Pt | 0 | 0 | 0.00000 |
| HETATM | 376 | Pt | 15.71642 | 24.62536 | 26.29083 | Pt | 0 | 0 | 0.00000 |
| HETATM | 377 | Pt | 1.20957  | 19.04403 | 26.32726 | Pt | 0 | 0 | 0.00000 |
| HETATM | 378 | Pt | 1.21405  | 21.83338 | 26.31985 | Pt | 0 | 0 | 0.00000 |
| HETATM | 379 | Pt | 1.21889  | 2.29568  | 26.29836 | Pt | 0 | 0 | 0.00000 |
| HETATM | 380 | Pt | 1.21405  | 5.08765  | 26.31985 | Pt | 0 | 0 | 0.00000 |
| HETATM | 381 | Pt | 1.20957  | 7.87701  | 26.32726 | Pt | 0 | 0 | 0.00000 |
| HETATM | 382 | Pt | 1.21460  | 10.67213 | 26.30792 | Pt | 0 | 0 | 0.00000 |
| HETATM | 383 | Pt | 1.21638  | 13.46052 | 26.30891 | Pt | 0 | 0 | 0.00000 |
| HETATM | 384 | Pt | 1.21460  | 16.24891 | 26.30792 | Pt | 0 | 0 | 0.00000 |
| HETATM | 385 | Pt | 2.01930  | 17.65664 | 28.89675 | Pt | 0 | 0 | 0.00000 |
| HETATM | 386 | Pt | 2.05062  | 20.43978 | 28.97952 | Pt | 0 | 0 | 0.00000 |
| HETATM | 387 | Pt | 2.02628  | 23.22612 | 28.88796 | Pt | 0 | 0 | 0.00000 |
| HETATM | 388 | Pt | 2.02628  | 3.69491  | 28.88796 | Pt | 0 | 0 | 0.00000 |
| HETATM | 389 | Pt | 2.05062  | 6.48126  | 28.97952 | Pt | 0 | 0 | 0.00000 |
| HETATM | 390 | Pt | 2.01930  | 9.26440  | 28.89674 | Pt | 0 | 0 | 0.00000 |
| HETATM | 391 | Pt | 2.03265  | 12.05827 | 28.93720 | Pt | 0 | 0 | 0.00000 |
| HETATM | 392 | Pt | 2.03265  | 14.86276 | 28.93720 | Pt | 0 | 0 | 0.00000 |
| HETATM | 393 | Pt | 6.93057  | 20.42671 | 28.89119 | Pt | 0 | 0 | 0.00000 |
| HETATM | 394 | Pt | 6.89422  | 23.22196 | 28.94602 | Pt | 0 | 0 | 0.00000 |
| HETATM | 395 | Pt | 6.89422  | 26.02875 | 28.94602 | Pt | 0 | 0 | 0.00000 |
| HETATM | 396 | Pt | 6.93057  | 6.49432  | 28.89119 | Pt | 0 | 0 | 0.00000 |
| HETATM | 397 | Pt | 6.90217  | 9.27138  | 28.97690 | Pt | 0 | 0 | 0.00000 |
| HETATM | 398 | Pt | 6.90092  | 12.05012 | 28.93008 | Pt | 0 | 0 | 0.00000 |
| HETATM | 399 | Pt | 6.90092  | 14.87091 | 28.93008 | Pt | 0 | 0 | 0.00000 |
| HETATM | 400 | Pt | 6.90217  | 17.64966 | 28.97690 | Pt | 0 | 0 | 0.00000 |
| HETATM | 401 | Pt | 11.71036 | 23.17009 | 28.91292 | Pt | 0 | 0 | 0.00000 |
| HETATM | 402 | Pt | 11.71036 | 26.08063 | 28.91292 | Pt | 0 | 0 | 0.00000 |
| HETATM | 403 | Pt | 11.77601 | 28.94722 | 28.88617 | Pt | 0 | 0 | 0.00000 |
| HETATM | 404 | Pt | 11.75132 | 9.36204  | 29.89271 | Pt | 0 | 0 | 0.00000 |
| HETATM | 405 | Pt | 11.72170 | 12.03304 | 28.78400 | Pt | 0 | 0 | 0.00000 |
| HETATM | 406 | Pt | 11.72170 | 14.88800 | 28.78400 | Pt | 0 | 0 | 0.00000 |
| HETATM | 407 | Pt | 11.75132 | 17.55899 | 29.89271 | Pt | 0 | 0 | 0.00000 |
| HETATM | 408 | Pt | 11.77601 | 20.30349 | 28.88617 | Pt | 0 | 0 | 0.00000 |
| HETATM | 409 | Pt | 16.52296 | 26.07275 | 28.89548 | Pt | 0 | 0 | 0.00000 |
| HETATM | 410 | Pt | 16.50543 | 28.92447 | 28.88139 | Pt | 0 | 0 | 0.00000 |
| HETATM | 411 | Pt | 16.56469 | 31.66318 | 29.85629 | Pt | 0 | 0 | 0.00000 |
| HETATM | 412 | Pt | 16.52219 | 12.05220 | 28.79564 | Pt | 0 | 0 | 0.00000 |
| HETATM | 413 | Pt | 16.52219 | 14.86883 | 28.79564 | Pt | 0 | 0 | 0.00000 |
| HETATM | 414 | Pt | 16.56469 | 17.58753 | 29.85629 | Pt | 0 | 0 | 0.00000 |
| HETATM | 415 | Pt | 16.50543 | 20.32624 | 28.88139 | Pt | 0 | 0 | 0.00000 |
| HETATM | 416 | Pt | 16.52296 | 23.17796 | 28.89548 | Pt | 0 | 0 | 0.00000 |
| HETATM | 417 | Pt | 4.42346  | 19.04336 | 28.65779 | Pt | 0 | 0 | 0.00000 |
| HETATM | 418 | Pt | 4.42507  | 21.83277 | 28.65575 | Pt | 0 | 0 | 0.00000 |
| HETATM | 419 | Pt | 4.41496  | 24.62536 | 28.64501 | Pt | 0 | 0 | 0.00000 |
| HETATM | 420 | Pt | 4.42507  | 5.08827  | 28.65575 | Pt | 0 | 0 | 0.00000 |
| HETATM | 421 | Pt | 4.42346  | 7.87768  | 28.65779 | Pt | 0 | 0 | 0.00000 |
| HETATM | 422 | Pt | 4.41761  | 10.66622 | 28.65349 | Pt | 0 | 0 | 0.00000 |
| HETATM | 423 | Pt | 4.41447  | 13.46052 | 28.65160 | Pt | 0 | 0 | 0.00000 |
| HETATM | 424 | Pt | 4.41761  | 16.25481 | 28.65349 | Pt | 0 | 0 | 0.00000 |
| HETATM | 425 | Pt | 9.28697  | 21.83183 | 28.65122 | Pt | 0 | 0 | 0.00000 |
| HETATM | 426 | Pt | 9.26435  | 24.62536 | 28.65504 | Pt | 0 | 0 | 0.00000 |
| HETATM | 427 | Pt | 9.28697  | 27.41888 | 28.65122 | Pt | 0 | 0 | 0.00000 |
| HETATM | 428 | Pt | 9.33152  | 7.91165  | 28.70516 | Pt | 0 | 0 | 0.00000 |
| HETATM | 429 | Pt | 9.33335  | 10.61008 | 28.67170 | Pt | 0 | 0 | 0.00000 |
| HETATM | 430 | Pt | 9.27124  | 13.46052 | 28.77579 | Pt | 0 | 0 | 0.00000 |
| HETATM | 431 | Pt | 9.33335  | 16.31096 | 28.67170 | Pt | 0 | 0 | 0.00000 |
| HETATM | 432 | Pt | 9.33152  | 19.00939 | 28.70516 | Pt | 0 | 0 | 0.00000 |
| HETATM | 433 | Pt | 14.06221 | 24.62536 | 28.64918 | Pt | 0 | 0 | 0.00000 |
| HETATM | 434 | Pt | 14.09025 | 27.42844 | 28.63770 | Pt | 0 | 0 | 0.00000 |
| HETATM | 435 | Pt | 14.11492 | 30.37853 | 28.76722 | Pt | 0 | 0 | 0.00000 |

|        |     |    |          |          |          |    |   |   |         |
|--------|-----|----|----------|----------|----------|----|---|---|---------|
| HETATM | 436 | Pt | 14.10605 | 10.68221 | 28.80053 | Pt | 0 | 0 | 0.00000 |
| HETATM | 437 | Pt | 14.13032 | 13.46052 | 28.49631 | Pt | 0 | 0 | 0.00000 |
| HETATM | 438 | Pt | 14.10605 | 16.23883 | 28.80053 | Pt | 0 | 0 | 0.00000 |
| HETATM | 439 | Pt | 14.11492 | 18.87219 | 28.76722 | Pt | 0 | 0 | 0.00000 |
| HETATM | 440 | Pt | 14.09025 | 21.82227 | 28.63770 | Pt | 0 | 0 | 0.00000 |
| HETATM | 441 | Pt | 18.89247 | 27.43468 | 28.63752 | Pt | 0 | 0 | 0.00000 |
| HETATM | 442 | Pt | 18.86750 | 30.28904 | 28.69776 | Pt | 0 | 0 | 0.00000 |
| HETATM | 443 | Pt | 18.87379 | 32.94717 | 28.68338 | Pt | 0 | 0 | 0.00000 |
| HETATM | 444 | Pt | 18.90861 | 13.46052 | 28.62651 | Pt | 0 | 0 | 0.00000 |
| HETATM | 445 | Pt | 18.87379 | 16.30355 | 28.68338 | Pt | 0 | 0 | 0.00000 |
| HETATM | 446 | Pt | 18.86750 | 18.96168 | 28.69776 | Pt | 0 | 0 | 0.00000 |
| HETATM | 447 | Pt | 18.89247 | 21.81603 | 28.63752 | Pt | 0 | 0 | 0.00000 |
| HETATM | 448 | Pt | 18.88828 | 24.62536 | 28.64646 | Pt | 0 | 0 | 0.00000 |
| HETATM | 449 | O  | 3.00765  | 19.02212 | 29.95128 | O  | 0 | 0 | 0.00000 |
| HETATM | 450 | O  | 3.01275  | 21.86174 | 29.94851 | O  | 0 | 0 | 0.00000 |
| HETATM | 451 | O  | 2.98300  | 2.29568  | 29.91368 | O  | 0 | 0 | 0.00000 |
| HETATM | 452 | O  | 3.01275  | 5.05929  | 29.94851 | O  | 0 | 0 | 0.00000 |
| HETATM | 453 | O  | 3.00765  | 7.89891  | 29.95128 | O  | 0 | 0 | 0.00000 |
| HETATM | 454 | O  | 2.99222  | 10.65228 | 29.93449 | O  | 0 | 0 | 0.00000 |
| HETATM | 455 | O  | 3.01551  | 13.46052 | 29.94696 | O  | 0 | 0 | 0.00000 |
| HETATM | 456 | O  | 2.99222  | 16.26876 | 29.93449 | O  | 0 | 0 | 0.00000 |
| HETATM | 457 | O  | 7.87713  | 21.81661 | 29.93727 | O  | 0 | 0 | 0.00000 |
| HETATM | 458 | O  | 7.87302  | 24.62536 | 29.95227 | O  | 0 | 0 | 0.00000 |
| HETATM | 459 | O  | 7.87713  | 5.10442  | 29.93727 | O  | 0 | 0 | 0.00000 |
| HETATM | 460 | O  | 7.86944  | 7.83943  | 29.96285 | O  | 0 | 0 | 0.00000 |
| HETATM | 461 | O  | 7.87943  | 10.67443 | 29.95987 | O  | 0 | 0 | 0.00000 |
| HETATM | 462 | O  | 7.76897  | 13.46052 | 30.00444 | O  | 0 | 0 | 0.00000 |
| HETATM | 463 | O  | 7.87943  | 16.24660 | 29.95987 | O  | 0 | 0 | 0.00000 |
| HETATM | 464 | O  | 7.86944  | 19.08161 | 29.96285 | O  | 0 | 0 | 0.00000 |
| HETATM | 465 | O  | 12.68735 | 24.62536 | 29.92695 | O  | 0 | 0 | 0.00000 |
| HETATM | 466 | O  | 12.66973 | 27.46021 | 29.90821 | O  | 0 | 0 | 0.00000 |
| HETATM | 467 | O  | 12.85250 | 7.67724  | 30.12692 | O  | 0 | 0 | 0.00000 |
| HETATM | 468 | O  | 12.80950 | 11.08126 | 30.10946 | O  | 0 | 0 | 0.00000 |
| HETATM | 469 | O  | 10.95597 | 13.46052 | 29.88542 | O  | 0 | 0 | 0.00000 |
| HETATM | 470 | O  | 12.80950 | 15.83977 | 30.10946 | O  | 0 | 0 | 0.00000 |
| HETATM | 471 | O  | 12.85250 | 19.24380 | 30.12692 | O  | 0 | 0 | 0.00000 |
| HETATM | 472 | O  | 12.66973 | 21.79050 | 29.90821 | O  | 0 | 0 | 0.00000 |
| HETATM | 473 | O  | 17.44928 | 27.44310 | 29.90142 | O  | 0 | 0 | 0.00000 |
| HETATM | 474 | O  | 17.63359 | 29.97400 | 30.10657 | O  | 0 | 0 | 0.00000 |
| HETATM | 475 | O  | 17.65479 | 10.97936 | 30.07988 | O  | 0 | 0 | 0.00000 |
| HETATM | 476 | O  | 17.36887 | 13.46052 | 29.84033 | O  | 0 | 0 | 0.00000 |
| HETATM | 477 | O  | 17.65479 | 15.94168 | 30.07988 | O  | 0 | 0 | 0.00000 |
| HETATM | 478 | O  | 17.63359 | 19.27671 | 30.10657 | O  | 0 | 0 | 0.00000 |
| HETATM | 479 | O  | 17.44928 | 21.80761 | 29.90142 | O  | 0 | 0 | 0.00000 |
| HETATM | 480 | O  | 17.50313 | 24.62536 | 29.91918 | O  | 0 | 0 | 0.00000 |

UNIT ENERGY kcal  
ENERGY -60160.547768  
END

XTLGFR 200  
DESCRP TS  
REMARK Pt111\_0.50ML\_8x8x7\_30.0\_vac fcc-displacement  
FIXATOMS 1 128  
CRYSTX 22.32968 22.32968 43.67409 90.00000 90.00000 60.00000  
FORMAT ATOM (a6,1x,i5,1x,a5,1x,a3,1x,a1,1x,a5,3f10.5,1x,a5,i3,i2,1x,f8.5)  
HETATM 1 Pt 2.02016 17.64733 14.95089 Pt 0 0 0.00000  
HETATM 2 Pt 2.02016 20.43854 14.95089 Pt 0 0 0.00000  
HETATM 3 Pt 2.02016 23.22975 14.95089 Pt 0 0 0.00000  
HETATM 4 Pt 2.02016 3.69128 14.95089 Pt 0 0 0.00000  
HETATM 5 Pt 2.02016 6.48249 14.95089 Pt 0 0 0.00000  
HETATM 6 Pt 2.02016 9.27370 14.95089 Pt 0 0 0.00000  
HETATM 7 Pt 2.02016 12.06491 14.95089 Pt 0 0 0.00000  
HETATM 8 Pt 2.02016 14.85612 14.95089 Pt 0 0 0.00000



|        |    |    |          |          |          |    |   |   |         |
|--------|----|----|----------|----------|----------|----|---|---|---------|
| HETATM | 9  | Pt | 6.85468  | 20.43854 | 14.95089 | Pt | 0 | 0 | 0.00000 |
| HETATM | 10 | Pt | 6.85468  | 23.22975 | 14.95089 | Pt | 0 | 0 | 0.00000 |
| HETATM | 11 | Pt | 6.85468  | 26.02096 | 14.95089 | Pt | 0 | 0 | 0.00000 |
| HETATM | 12 | Pt | 6.85468  | 6.48249  | 14.95089 | Pt | 0 | 0 | 0.00000 |
| HETATM | 13 | Pt | 6.85468  | 9.27370  | 14.95089 | Pt | 0 | 0 | 0.00000 |
| HETATM | 14 | Pt | 6.85468  | 12.06491 | 14.95089 | Pt | 0 | 0 | 0.00000 |
| HETATM | 15 | Pt | 6.85468  | 14.85612 | 14.95089 | Pt | 0 | 0 | 0.00000 |
| HETATM | 16 | Pt | 6.85468  | 17.64733 | 14.95089 | Pt | 0 | 0 | 0.00000 |
| HETATM | 17 | Pt | 11.68920 | 23.22975 | 14.95089 | Pt | 0 | 0 | 0.00000 |
| HETATM | 18 | Pt | 11.68920 | 26.02096 | 14.95089 | Pt | 0 | 0 | 0.00000 |
| HETATM | 19 | Pt | 11.68920 | 28.81217 | 14.95089 | Pt | 0 | 0 | 0.00000 |
| HETATM | 20 | Pt | 11.68920 | 9.27370  | 14.95089 | Pt | 0 | 0 | 0.00000 |
| HETATM | 21 | Pt | 11.68920 | 12.06491 | 14.95089 | Pt | 0 | 0 | 0.00000 |
| HETATM | 22 | Pt | 11.68920 | 14.85612 | 14.95089 | Pt | 0 | 0 | 0.00000 |
| HETATM | 23 | Pt | 11.68920 | 17.64733 | 14.95089 | Pt | 0 | 0 | 0.00000 |
| HETATM | 24 | Pt | 11.68920 | 20.43854 | 14.95089 | Pt | 0 | 0 | 0.00000 |
| HETATM | 25 | Pt | 16.52371 | 26.02096 | 14.95089 | Pt | 0 | 0 | 0.00000 |
| HETATM | 26 | Pt | 16.52371 | 28.81217 | 14.95089 | Pt | 0 | 0 | 0.00000 |
| HETATM | 27 | Pt | 16.52371 | 31.60338 | 14.95089 | Pt | 0 | 0 | 0.00000 |
| HETATM | 28 | Pt | 16.52371 | 12.06491 | 14.95089 | Pt | 0 | 0 | 0.00000 |
| HETATM | 29 | Pt | 16.52371 | 14.85612 | 14.95089 | Pt | 0 | 0 | 0.00000 |
| HETATM | 30 | Pt | 16.52371 | 17.64733 | 14.95089 | Pt | 0 | 0 | 0.00000 |
| HETATM | 31 | Pt | 16.52371 | 20.43854 | 14.95089 | Pt | 0 | 0 | 0.00000 |
| HETATM | 32 | Pt | 16.52371 | 23.22975 | 14.95089 | Pt | 0 | 0 | 0.00000 |
| HETATM | 33 | Pt | 4.43742  | 19.04294 | 14.95089 | Pt | 0 | 0 | 0.00000 |
| HETATM | 34 | Pt | 4.43742  | 21.83415 | 14.95089 | Pt | 0 | 0 | 0.00000 |
| HETATM | 35 | Pt | 4.43742  | 24.62536 | 14.95089 | Pt | 0 | 0 | 0.00000 |
| HETATM | 36 | Pt | 4.43742  | 5.08689  | 14.95089 | Pt | 0 | 0 | 0.00000 |
| HETATM | 37 | Pt | 4.43742  | 7.87810  | 14.95089 | Pt | 0 | 0 | 0.00000 |
| HETATM | 38 | Pt | 4.43742  | 10.66931 | 14.95089 | Pt | 0 | 0 | 0.00000 |
| HETATM | 39 | Pt | 4.43742  | 13.46052 | 14.95089 | Pt | 0 | 0 | 0.00000 |
| HETATM | 40 | Pt | 4.43742  | 16.25173 | 14.95089 | Pt | 0 | 0 | 0.00000 |
| HETATM | 41 | Pt | 9.27194  | 21.83415 | 14.95089 | Pt | 0 | 0 | 0.00000 |
| HETATM | 42 | Pt | 9.27194  | 24.62536 | 14.95089 | Pt | 0 | 0 | 0.00000 |
| HETATM | 43 | Pt | 9.27194  | 27.41657 | 14.95089 | Pt | 0 | 0 | 0.00000 |
| HETATM | 44 | Pt | 9.27194  | 7.87810  | 14.95089 | Pt | 0 | 0 | 0.00000 |
| HETATM | 45 | Pt | 9.27194  | 10.66931 | 14.95089 | Pt | 0 | 0 | 0.00000 |
| HETATM | 46 | Pt | 9.27194  | 13.46052 | 14.95089 | Pt | 0 | 0 | 0.00000 |
| HETATM | 47 | Pt | 9.27194  | 16.25173 | 14.95089 | Pt | 0 | 0 | 0.00000 |
| HETATM | 48 | Pt | 9.27194  | 19.04294 | 14.95089 | Pt | 0 | 0 | 0.00000 |
| HETATM | 49 | Pt | 14.10646 | 24.62536 | 14.95089 | Pt | 0 | 0 | 0.00000 |
| HETATM | 50 | Pt | 14.10646 | 27.41657 | 14.95089 | Pt | 0 | 0 | 0.00000 |
| HETATM | 51 | Pt | 14.10646 | 30.20778 | 14.95089 | Pt | 0 | 0 | 0.00000 |
| HETATM | 52 | Pt | 14.10646 | 10.66931 | 14.95089 | Pt | 0 | 0 | 0.00000 |
| HETATM | 53 | Pt | 14.10646 | 13.46052 | 14.95089 | Pt | 0 | 0 | 0.00000 |
| HETATM | 54 | Pt | 14.10646 | 16.25173 | 14.95089 | Pt | 0 | 0 | 0.00000 |
| HETATM | 55 | Pt | 14.10646 | 19.04294 | 14.95089 | Pt | 0 | 0 | 0.00000 |
| HETATM | 56 | Pt | 14.10646 | 21.83415 | 14.95089 | Pt | 0 | 0 | 0.00000 |
| HETATM | 57 | Pt | 18.94097 | 27.41657 | 14.95089 | Pt | 0 | 0 | 0.00000 |
| HETATM | 58 | Pt | 18.94097 | 30.20778 | 14.95089 | Pt | 0 | 0 | 0.00000 |
| HETATM | 59 | Pt | 18.94097 | 32.99899 | 14.95089 | Pt | 0 | 0 | 0.00000 |
| HETATM | 60 | Pt | 18.94097 | 13.46052 | 14.95089 | Pt | 0 | 0 | 0.00000 |
| HETATM | 61 | Pt | 18.94097 | 16.25173 | 14.95089 | Pt | 0 | 0 | 0.00000 |
| HETATM | 62 | Pt | 18.94097 | 19.04294 | 14.95089 | Pt | 0 | 0 | 0.00000 |
| HETATM | 63 | Pt | 18.94097 | 21.83415 | 14.95089 | Pt | 0 | 0 | 0.00000 |
| HETATM | 64 | Pt | 18.94097 | 24.62536 | 14.95089 | Pt | 0 | 0 | 0.00000 |
| HETATM | 65 | Pt | 2.82591  | 19.04294 | 17.22991 | Pt | 0 | 0 | 0.00000 |
| HETATM | 66 | Pt | 2.82591  | 21.83415 | 17.22991 | Pt | 0 | 0 | 0.00000 |
| HETATM | 67 | Pt | 2.82591  | 2.29568  | 17.22991 | Pt | 0 | 0 | 0.00000 |
| HETATM | 68 | Pt | 2.82591  | 5.08689  | 17.22991 | Pt | 0 | 0 | 0.00000 |
| HETATM | 69 | Pt | 2.82591  | 7.87810  | 17.22991 | Pt | 0 | 0 | 0.00000 |
| HETATM | 70 | Pt | 2.82591  | 10.66931 | 17.22991 | Pt | 0 | 0 | 0.00000 |
| HETATM | 71 | Pt | 2.82591  | 13.46052 | 17.22991 | Pt | 0 | 0 | 0.00000 |

|        |     |    |          |          |          |    |   |   |         |
|--------|-----|----|----------|----------|----------|----|---|---|---------|
| HETATM | 72  | Pt | 2.82591  | 16.25173 | 17.22991 | Pt | 0 | 0 | 0.00000 |
| HETATM | 73  | Pt | 7.66043  | 21.83415 | 17.22991 | Pt | 0 | 0 | 0.00000 |
| HETATM | 74  | Pt | 7.66043  | 24.62536 | 17.22991 | Pt | 0 | 0 | 0.00000 |
| HETATM | 75  | Pt | 7.66043  | 5.08689  | 17.22991 | Pt | 0 | 0 | 0.00000 |
| HETATM | 76  | Pt | 7.66043  | 7.87810  | 17.22991 | Pt | 0 | 0 | 0.00000 |
| HETATM | 77  | Pt | 7.66043  | 10.66931 | 17.22991 | Pt | 0 | 0 | 0.00000 |
| HETATM | 78  | Pt | 7.66043  | 13.46052 | 17.22991 | Pt | 0 | 0 | 0.00000 |
| HETATM | 79  | Pt | 7.66043  | 16.25173 | 17.22991 | Pt | 0 | 0 | 0.00000 |
| HETATM | 80  | Pt | 7.66043  | 19.04294 | 17.22991 | Pt | 0 | 0 | 0.00000 |
| HETATM | 81  | Pt | 12.49495 | 24.62536 | 17.22991 | Pt | 0 | 0 | 0.00000 |
| HETATM | 82  | Pt | 12.49495 | 27.41657 | 17.22991 | Pt | 0 | 0 | 0.00000 |
| HETATM | 83  | Pt | 12.49495 | 7.87810  | 17.22991 | Pt | 0 | 0 | 0.00000 |
| HETATM | 84  | Pt | 12.49495 | 10.66931 | 17.22991 | Pt | 0 | 0 | 0.00000 |
| HETATM | 85  | Pt | 12.49495 | 13.46052 | 17.22991 | Pt | 0 | 0 | 0.00000 |
| HETATM | 86  | Pt | 12.49495 | 16.25173 | 17.22991 | Pt | 0 | 0 | 0.00000 |
| HETATM | 87  | Pt | 12.49495 | 19.04294 | 17.22991 | Pt | 0 | 0 | 0.00000 |
| HETATM | 88  | Pt | 12.49495 | 21.83415 | 17.22991 | Pt | 0 | 0 | 0.00000 |
| HETATM | 89  | Pt | 17.32946 | 27.41657 | 17.22991 | Pt | 0 | 0 | 0.00000 |
| HETATM | 90  | Pt | 17.32946 | 30.20778 | 17.22991 | Pt | 0 | 0 | 0.00000 |
| HETATM | 91  | Pt | 17.32946 | 10.66931 | 17.22991 | Pt | 0 | 0 | 0.00000 |
| HETATM | 92  | Pt | 17.32946 | 13.46052 | 17.22991 | Pt | 0 | 0 | 0.00000 |
| HETATM | 93  | Pt | 17.32946 | 16.25173 | 17.22991 | Pt | 0 | 0 | 0.00000 |
| HETATM | 94  | Pt | 17.32946 | 19.04294 | 17.22991 | Pt | 0 | 0 | 0.00000 |
| HETATM | 95  | Pt | 17.32946 | 21.83415 | 17.22991 | Pt | 0 | 0 | 0.00000 |
| HETATM | 96  | Pt | 17.32946 | 24.62536 | 17.22991 | Pt | 0 | 0 | 0.00000 |
| HETATM | 97  | Pt | 5.24317  | 20.43854 | 17.22991 | Pt | 0 | 0 | 0.00000 |
| HETATM | 98  | Pt | 5.24317  | 23.22975 | 17.22991 | Pt | 0 | 0 | 0.00000 |
| HETATM | 99  | Pt | 5.24317  | 3.69128  | 17.22991 | Pt | 0 | 0 | 0.00000 |
| HETATM | 100 | Pt | 5.24317  | 6.48249  | 17.22991 | Pt | 0 | 0 | 0.00000 |
| HETATM | 101 | Pt | 5.24317  | 9.27370  | 17.22991 | Pt | 0 | 0 | 0.00000 |
| HETATM | 102 | Pt | 5.24317  | 12.06491 | 17.22991 | Pt | 0 | 0 | 0.00000 |
| HETATM | 103 | Pt | 5.24317  | 14.85612 | 17.22991 | Pt | 0 | 0 | 0.00000 |
| HETATM | 104 | Pt | 5.24317  | 17.64733 | 17.22991 | Pt | 0 | 0 | 0.00000 |
| HETATM | 105 | Pt | 10.07769 | 23.22975 | 17.22991 | Pt | 0 | 0 | 0.00000 |
| HETATM | 106 | Pt | 10.07769 | 26.02096 | 17.22991 | Pt | 0 | 0 | 0.00000 |
| HETATM | 107 | Pt | 10.07769 | 6.48249  | 17.22991 | Pt | 0 | 0 | 0.00000 |
| HETATM | 108 | Pt | 10.07769 | 9.27370  | 17.22991 | Pt | 0 | 0 | 0.00000 |
| HETATM | 109 | Pt | 10.07769 | 12.06491 | 17.22991 | Pt | 0 | 0 | 0.00000 |
| HETATM | 110 | Pt | 10.07769 | 14.85612 | 17.22991 | Pt | 0 | 0 | 0.00000 |
| HETATM | 111 | Pt | 10.07769 | 17.64733 | 17.22991 | Pt | 0 | 0 | 0.00000 |
| HETATM | 112 | Pt | 10.07769 | 20.43854 | 17.22991 | Pt | 0 | 0 | 0.00000 |
| HETATM | 113 | Pt | 14.91221 | 26.02096 | 17.22991 | Pt | 0 | 0 | 0.00000 |
| HETATM | 114 | Pt | 14.91221 | 28.81217 | 17.22991 | Pt | 0 | 0 | 0.00000 |
| HETATM | 115 | Pt | 14.91221 | 9.27370  | 17.22991 | Pt | 0 | 0 | 0.00000 |
| HETATM | 116 | Pt | 14.91221 | 12.06491 | 17.22991 | Pt | 0 | 0 | 0.00000 |
| HETATM | 117 | Pt | 14.91221 | 14.85612 | 17.22991 | Pt | 0 | 0 | 0.00000 |
| HETATM | 118 | Pt | 14.91221 | 17.64733 | 17.22991 | Pt | 0 | 0 | 0.00000 |
| HETATM | 119 | Pt | 14.91221 | 20.43854 | 17.22991 | Pt | 0 | 0 | 0.00000 |
| HETATM | 120 | Pt | 14.91221 | 23.22975 | 17.22991 | Pt | 0 | 0 | 0.00000 |
| HETATM | 121 | Pt | 0.40865  | 17.64733 | 17.22991 | Pt | 0 | 0 | 0.00000 |
| HETATM | 122 | Pt | 0.40865  | 20.43854 | 17.22991 | Pt | 0 | 0 | 0.00000 |
| HETATM | 123 | Pt | 0.40865  | 0.90007  | 17.22991 | Pt | 0 | 0 | 0.00000 |
| HETATM | 124 | Pt | 0.40865  | 3.69128  | 17.22991 | Pt | 0 | 0 | 0.00000 |
| HETATM | 125 | Pt | 0.40865  | 6.48249  | 17.22991 | Pt | 0 | 0 | 0.00000 |
| HETATM | 126 | Pt | 0.40865  | 9.27370  | 17.22991 | Pt | 0 | 0 | 0.00000 |
| HETATM | 127 | Pt | 0.40865  | 12.06491 | 17.22991 | Pt | 0 | 0 | 0.00000 |
| HETATM | 128 | Pt | 0.40865  | 14.85612 | 17.22991 | Pt | 0 | 0 | 0.00000 |
| HETATM | 129 | Pt | 3.63152  | 20.43733 | 19.51022 | Pt | 0 | 0 | 0.00000 |
| HETATM | 130 | Pt | 3.63365  | 23.22874 | 19.50821 | Pt | 0 | 0 | 0.00000 |
| HETATM | 131 | Pt | 3.63423  | 3.69088  | 19.50783 | Pt | 0 | 0 | 0.00000 |
| HETATM | 132 | Pt | 3.63276  | 6.48229  | 19.50951 | Pt | 0 | 0 | 0.00000 |
| HETATM | 133 | Pt | 3.63223  | 9.27320  | 19.51004 | Pt | 0 | 0 | 0.00000 |
| HETATM | 134 | Pt | 3.63243  | 12.06423 | 19.50927 | Pt | 0 | 0 | 0.00000 |

|        |     |    |          |          |          |    |   |   |         |
|--------|-----|----|----------|----------|----------|----|---|---|---------|
| HETATM | 135 | Pt | 3.63202  | 14.85554 | 19.50928 | Pt | 0 | 0 | 0.00000 |
| HETATM | 136 | Pt | 3.63121  | 17.64654 | 19.51031 | Pt | 0 | 0 | 0.00000 |
| HETATM | 137 | Pt | 8.46830  | 23.23032 | 19.50998 | Pt | 0 | 0 | 0.00000 |
| HETATM | 138 | Pt | 8.46867  | 26.02200 | 19.51007 | Pt | 0 | 0 | 0.00000 |
| HETATM | 139 | Pt | 8.46695  | 6.48285  | 19.51171 | Pt | 0 | 0 | 0.00000 |
| HETATM | 140 | Pt | 8.46594  | 9.27298  | 19.51256 | Pt | 0 | 0 | 0.00000 |
| HETATM | 141 | Pt | 8.46688  | 12.06480 | 19.51249 | Pt | 0 | 0 | 0.00000 |
| HETATM | 142 | Pt | 8.46656  | 14.85668 | 19.51263 | Pt | 0 | 0 | 0.00000 |
| HETATM | 143 | Pt | 8.46584  | 17.64812 | 19.51239 | Pt | 0 | 0 | 0.00000 |
| HETATM | 144 | Pt | 8.46660  | 20.43905 | 19.51132 | Pt | 0 | 0 | 0.00000 |
| HETATM | 145 | Pt | 13.30201 | 26.02243 | 19.51072 | Pt | 0 | 0 | 0.00000 |
| HETATM | 146 | Pt | 13.30013 | 28.81294 | 19.51338 | Pt | 0 | 0 | 0.00000 |
| HETATM | 147 | Pt | 13.29917 | 9.27234  | 19.51135 | Pt | 0 | 0 | 0.00000 |
| HETATM | 148 | Pt | 13.30004 | 12.06344 | 19.50563 | Pt | 0 | 0 | 0.00000 |
| HETATM | 149 | Pt | 13.29941 | 14.85690 | 19.50605 | Pt | 0 | 0 | 0.00000 |
| HETATM | 150 | Pt | 13.29907 | 17.64882 | 19.50944 | Pt | 0 | 0 | 0.00000 |
| HETATM | 151 | Pt | 13.30034 | 20.43933 | 19.51051 | Pt | 0 | 0 | 0.00000 |
| HETATM | 152 | Pt | 13.30182 | 23.23053 | 19.50970 | Pt | 0 | 0 | 0.00000 |
| HETATM | 153 | Pt | 18.13367 | 28.81216 | 19.51140 | Pt | 0 | 0 | 0.00000 |
| HETATM | 154 | Pt | 18.13370 | 31.60262 | 19.51120 | Pt | 0 | 0 | 0.00000 |
| HETATM | 155 | Pt | 18.13649 | 12.06388 | 19.50684 | Pt | 0 | 0 | 0.00000 |
| HETATM | 156 | Pt | 18.13698 | 14.85562 | 19.50542 | Pt | 0 | 0 | 0.00000 |
| HETATM | 157 | Pt | 18.13484 | 17.64669 | 19.50840 | Pt | 0 | 0 | 0.00000 |
| HETATM | 158 | Pt | 18.13511 | 20.43752 | 19.50902 | Pt | 0 | 0 | 0.00000 |
| HETATM | 159 | Pt | 18.13582 | 23.22893 | 19.50865 | Pt | 0 | 0 | 0.00000 |
| HETATM | 160 | Pt | 18.13535 | 26.02071 | 19.50925 | Pt | 0 | 0 | 0.00000 |
| HETATM | 161 | Pt | 6.05089  | 21.83359 | 19.51116 | Pt | 0 | 0 | 0.00000 |
| HETATM | 162 | Pt | 6.05244  | 24.62548 | 19.51014 | Pt | 0 | 0 | 0.00000 |
| HETATM | 163 | Pt | 6.05161  | 5.08740  | 19.51093 | Pt | 0 | 0 | 0.00000 |
| HETATM | 164 | Pt | 6.05029  | 7.87844  | 19.51264 | Pt | 0 | 0 | 0.00000 |
| HETATM | 165 | Pt | 6.05086  | 10.66942 | 19.51333 | Pt | 0 | 0 | 0.00000 |
| HETATM | 166 | Pt | 6.05110  | 13.46011 | 19.51309 | Pt | 0 | 0 | 0.00000 |
| HETATM | 167 | Pt | 6.05037  | 16.25081 | 19.51335 | Pt | 0 | 0 | 0.00000 |
| HETATM | 168 | Pt | 6.04972  | 19.04199 | 19.51293 | Pt | 0 | 0 | 0.00000 |
| HETATM | 169 | Pt | 10.88636 | 24.62673 | 19.51148 | Pt | 0 | 0 | 0.00000 |
| HETATM | 170 | Pt | 10.88531 | 27.41763 | 19.51292 | Pt | 0 | 0 | 0.00000 |
| HETATM | 171 | Pt | 10.88299 | 7.87720  | 19.51359 | Pt | 0 | 0 | 0.00000 |
| HETATM | 172 | Pt | 10.88269 | 10.66752 | 19.51042 | Pt | 0 | 0 | 0.00000 |
| HETATM | 173 | Pt | 10.88301 | 13.46106 | 19.50932 | Pt | 0 | 0 | 0.00000 |
| HETATM | 174 | Pt | 10.88256 | 16.25391 | 19.51115 | Pt | 0 | 0 | 0.00000 |
| HETATM | 175 | Pt | 10.88325 | 19.04485 | 19.51238 | Pt | 0 | 0 | 0.00000 |
| HETATM | 176 | Pt | 10.88504 | 21.83534 | 19.51200 | Pt | 0 | 0 | 0.00000 |
| HETATM | 177 | Pt | 15.71825 | 27.41731 | 19.51224 | Pt | 0 | 0 | 0.00000 |
| HETATM | 178 | Pt | 15.71664 | 30.20775 | 19.51406 | Pt | 0 | 0 | 0.00000 |
| HETATM | 179 | Pt | 15.71800 | 10.66806 | 19.50971 | Pt | 0 | 0 | 0.00000 |
| HETATM | 180 | Pt | 15.71922 | 13.45976 | 19.50510 | Pt | 0 | 0 | 0.00000 |
| HETATM | 181 | Pt | 15.71768 | 16.25197 | 19.50775 | Pt | 0 | 0 | 0.00000 |
| HETATM | 182 | Pt | 15.71750 | 19.04295 | 19.51051 | Pt | 0 | 0 | 0.00000 |
| HETATM | 183 | Pt | 15.71879 | 21.83399 | 19.51018 | Pt | 0 | 0 | 0.00000 |
| HETATM | 184 | Pt | 15.71943 | 24.62559 | 19.50999 | Pt | 0 | 0 | 0.00000 |
| HETATM | 185 | Pt | 1.21348  | 19.04224 | 19.51222 | Pt | 0 | 0 | 0.00000 |
| HETATM | 186 | Pt | 1.21530  | 21.83302 | 19.51058 | Pt | 0 | 0 | 0.00000 |
| HETATM | 187 | Pt | 1.21759  | 2.29499  | 19.50831 | Pt | 0 | 0 | 0.00000 |
| HETATM | 188 | Pt | 1.21680  | 5.08652  | 19.50945 | Pt | 0 | 0 | 0.00000 |
| HETATM | 189 | Pt | 1.21537  | 7.87710  | 19.51114 | Pt | 0 | 0 | 0.00000 |
| HETATM | 190 | Pt | 1.21560  | 10.66794 | 19.51056 | Pt | 0 | 0 | 0.00000 |
| HETATM | 191 | Pt | 1.21547  | 13.45945 | 19.51022 | Pt | 0 | 0 | 0.00000 |
| HETATM | 192 | Pt | 1.21447  | 16.25113 | 19.51094 | Pt | 0 | 0 | 0.00000 |
| HETATM | 193 | Pt | 2.02100  | 17.64648 | 21.79375 | Pt | 0 | 0 | 0.00000 |
| HETATM | 194 | Pt | 2.02170  | 20.43707 | 21.79416 | Pt | 0 | 0 | 0.00000 |
| HETATM | 195 | Pt | 2.02667  | 23.22831 | 21.78940 | Pt | 0 | 0 | 0.00000 |
| HETATM | 196 | Pt | 2.02820  | 3.69065  | 21.78880 | Pt | 0 | 0 | 0.00000 |
| HETATM | 197 | Pt | 2.02481  | 6.48157  | 21.79312 | Pt | 0 | 0 | 0.00000 |

|        |     |    |          |          |          |    |   |   |         |
|--------|-----|----|----------|----------|----------|----|---|---|---------|
| HETATM | 198 | Pt | 2.02320  | 9.27139  | 21.79388 | Pt | 0 | 0 | 0.00000 |
| HETATM | 199 | Pt | 2.02369  | 12.06237 | 21.79176 | Pt | 0 | 0 | 0.00000 |
| HETATM | 200 | Pt | 2.02291  | 14.85444 | 21.79157 | Pt | 0 | 0 | 0.00000 |
| HETATM | 201 | Pt | 6.85832  | 20.43716 | 21.79522 | Pt | 0 | 0 | 0.00000 |
| HETATM | 202 | Pt | 6.86159  | 23.22892 | 21.79226 | Pt | 0 | 0 | 0.00000 |
| HETATM | 203 | Pt | 6.86240  | 26.02182 | 21.79206 | Pt | 0 | 0 | 0.00000 |
| HETATM | 204 | Pt | 6.85890  | 6.48337  | 21.79561 | Pt | 0 | 0 | 0.00000 |
| HETATM | 205 | Pt | 6.85771  | 9.27386  | 21.79901 | Pt | 0 | 0 | 0.00000 |
| HETATM | 206 | Pt | 6.86068  | 12.06530 | 21.79922 | Pt | 0 | 0 | 0.00000 |
| HETATM | 207 | Pt | 6.86008  | 14.85457 | 21.79965 | Pt | 0 | 0 | 0.00000 |
| HETATM | 208 | Pt | 6.85792  | 17.64513 | 21.79865 | Pt | 0 | 0 | 0.00000 |
| HETATM | 209 | Pt | 11.69532 | 23.23198 | 21.79395 | Pt | 0 | 0 | 0.00000 |
| HETATM | 210 | Pt | 11.69610 | 26.02466 | 21.79530 | Pt | 0 | 0 | 0.00000 |
| HETATM | 211 | Pt | 11.69167 | 28.81417 | 21.80027 | Pt | 0 | 0 | 0.00000 |
| HETATM | 212 | Pt | 11.68860 | 9.27174  | 21.79496 | Pt | 0 | 0 | 0.00000 |
| HETATM | 213 | Pt | 11.69018 | 12.06420 | 21.78355 | Pt | 0 | 0 | 0.00000 |
| HETATM | 214 | Pt | 11.68931 | 14.86050 | 21.78748 | Pt | 0 | 0 | 0.00000 |
| HETATM | 215 | Pt | 11.68936 | 17.65206 | 21.79469 | Pt | 0 | 0 | 0.00000 |
| HETATM | 216 | Pt | 11.69243 | 20.44092 | 21.79641 | Pt | 0 | 0 | 0.00000 |
| HETATM | 217 | Pt | 16.52717 | 26.02205 | 21.79153 | Pt | 0 | 0 | 0.00000 |
| HETATM | 218 | Pt | 16.52383 | 28.81391 | 21.79764 | Pt | 0 | 0 | 0.00000 |
| HETATM | 219 | Pt | 16.52359 | 31.60407 | 21.79700 | Pt | 0 | 0 | 0.00000 |
| HETATM | 220 | Pt | 16.52923 | 12.06505 | 21.78438 | Pt | 0 | 0 | 0.00000 |
| HETATM | 221 | Pt | 16.52981 | 14.85605 | 21.78035 | Pt | 0 | 0 | 0.00000 |
| HETATM | 222 | Pt | 16.52452 | 17.64701 | 21.78985 | Pt | 0 | 0 | 0.00000 |
| HETATM | 223 | Pt | 16.52568 | 20.43805 | 21.79149 | Pt | 0 | 0 | 0.00000 |
| HETATM | 224 | Pt | 16.52759 | 23.22972 | 21.79031 | Pt | 0 | 0 | 0.00000 |
| HETATM | 225 | Pt | 4.43800  | 19.04108 | 21.78967 | Pt | 0 | 0 | 0.00000 |
| HETATM | 226 | Pt | 4.44045  | 21.83196 | 21.78683 | Pt | 0 | 0 | 0.00000 |
| HETATM | 227 | Pt | 4.44367  | 24.62390 | 21.78396 | Pt | 0 | 0 | 0.00000 |
| HETATM | 228 | Pt | 4.44205  | 5.08631  | 21.78583 | Pt | 0 | 0 | 0.00000 |
| HETATM | 229 | Pt | 4.43894  | 7.87742  | 21.78925 | Pt | 0 | 0 | 0.00000 |
| HETATM | 230 | Pt | 4.43941  | 10.66817 | 21.78848 | Pt | 0 | 0 | 0.00000 |
| HETATM | 231 | Pt | 4.43966  | 13.45951 | 21.78684 | Pt | 0 | 0 | 0.00000 |
| HETATM | 232 | Pt | 4.43874  | 16.25042 | 21.78825 | Pt | 0 | 0 | 0.00000 |
| HETATM | 233 | Pt | 9.27586  | 21.83445 | 21.79020 | Pt | 0 | 0 | 0.00000 |
| HETATM | 234 | Pt | 9.27824  | 24.62671 | 21.78787 | Pt | 0 | 0 | 0.00000 |
| HETATM | 235 | Pt | 9.27654  | 27.41846 | 21.79103 | Pt | 0 | 0 | 0.00000 |
| HETATM | 236 | Pt | 9.27225  | 7.87743  | 21.79486 | Pt | 0 | 0 | 0.00000 |
| HETATM | 237 | Pt | 9.27295  | 10.66770 | 21.79195 | Pt | 0 | 0 | 0.00000 |
| HETATM | 238 | Pt | 9.27489  | 13.46251 | 21.79252 | Pt | 0 | 0 | 0.00000 |
| HETATM | 239 | Pt | 9.27288  | 16.25471 | 21.79402 | Pt | 0 | 0 | 0.00000 |
| HETATM | 240 | Pt | 9.27346  | 19.04420 | 21.79321 | Pt | 0 | 0 | 0.00000 |
| HETATM | 241 | Pt | 14.11038 | 24.62757 | 21.78701 | Pt | 0 | 0 | 0.00000 |
| HETATM | 242 | Pt | 14.10906 | 27.42049 | 21.79288 | Pt | 0 | 0 | 0.00000 |
| HETATM | 243 | Pt | 14.10563 | 30.20979 | 21.79726 | Pt | 0 | 0 | 0.00000 |
| HETATM | 244 | Pt | 14.10771 | 10.66826 | 21.78515 | Pt | 0 | 0 | 0.00000 |
| HETATM | 245 | Pt | 14.10890 | 13.46033 | 21.77443 | Pt | 0 | 0 | 0.00000 |
| HETATM | 246 | Pt | 14.10550 | 16.25413 | 21.78264 | Pt | 0 | 0 | 0.00000 |
| HETATM | 247 | Pt | 14.10628 | 19.04440 | 21.78959 | Pt | 0 | 0 | 0.00000 |
| HETATM | 248 | Pt | 14.10912 | 21.83508 | 21.78813 | Pt | 0 | 0 | 0.00000 |
| HETATM | 249 | Pt | 18.94166 | 27.41665 | 21.78835 | Pt | 0 | 0 | 0.00000 |
| HETATM | 250 | Pt | 18.93904 | 30.20770 | 21.79205 | Pt | 0 | 0 | 0.00000 |
| HETATM | 251 | Pt | 18.94267 | 32.99811 | 21.78734 | Pt | 0 | 0 | 0.00000 |
| HETATM | 252 | Pt | 18.94750 | 13.45988 | 21.78055 | Pt | 0 | 0 | 0.00000 |
| HETATM | 253 | Pt | 18.94523 | 16.25111 | 21.78266 | Pt | 0 | 0 | 0.00000 |
| HETATM | 254 | Pt | 18.94168 | 19.04117 | 21.78694 | Pt | 0 | 0 | 0.00000 |
| HETATM | 255 | Pt | 18.94282 | 21.83223 | 21.78615 | Pt | 0 | 0 | 0.00000 |
| HETATM | 256 | Pt | 18.94316 | 24.62443 | 21.78597 | Pt | 0 | 0 | 0.00000 |
| HETATM | 257 | Pt | 2.83371  | 19.04177 | 24.07770 | Pt | 0 | 0 | 0.00000 |
| HETATM | 258 | Pt | 2.83842  | 21.83191 | 24.07418 | Pt | 0 | 0 | 0.00000 |
| HETATM | 259 | Pt | 2.84447  | 2.29456  | 24.06907 | Pt | 0 | 0 | 0.00000 |
| HETATM | 260 | Pt | 2.84307  | 5.08751  | 24.07374 | Pt | 0 | 0 | 0.00000 |

|        |     |    |          |          |          |    |   |   |         |
|--------|-----|----|----------|----------|----------|----|---|---|---------|
| HETATM | 261 | Pt | 2.83740  | 7.87680  | 24.08038 | Pt | 0 | 0 | 0.00000 |
| HETATM | 262 | Pt | 2.83713  | 10.66472 | 24.07652 | Pt | 0 | 0 | 0.00000 |
| HETATM | 263 | Pt | 2.83733  | 13.45607 | 24.07227 | Pt | 0 | 0 | 0.00000 |
| HETATM | 264 | Pt | 2.83489  | 16.25022 | 24.07306 | Pt | 0 | 0 | 0.00000 |
| HETATM | 265 | Pt | 7.67584  | 21.83089 | 24.07766 | Pt | 0 | 0 | 0.00000 |
| HETATM | 266 | Pt | 7.67842  | 24.62530 | 24.07246 | Pt | 0 | 0 | 0.00000 |
| HETATM | 267 | Pt | 7.67860  | 5.09049  | 24.07704 | Pt | 0 | 0 | 0.00000 |
| HETATM | 268 | Pt | 7.67083  | 7.87799  | 24.08548 | Pt | 0 | 0 | 0.00000 |
| HETATM | 269 | Pt | 7.67435  | 10.66897 | 24.08581 | Pt | 0 | 0 | 0.00000 |
| HETATM | 270 | Pt | 7.68239  | 13.45948 | 24.09117 | Pt | 0 | 0 | 0.00000 |
| HETATM | 271 | Pt | 7.67459  | 16.24571 | 24.08990 | Pt | 0 | 0 | 0.00000 |
| HETATM | 272 | Pt | 7.67204  | 19.04028 | 24.08089 | Pt | 0 | 0 | 0.00000 |
| HETATM | 273 | Pt | 12.51081 | 24.63076 | 24.07501 | Pt | 0 | 0 | 0.00000 |
| HETATM | 274 | Pt | 12.51136 | 27.42680 | 24.08367 | Pt | 0 | 0 | 0.00000 |
| HETATM | 275 | Pt | 12.50210 | 7.88380  | 24.08883 | Pt | 0 | 0 | 0.00000 |
| HETATM | 276 | Pt | 12.50195 | 10.66913 | 24.06161 | Pt | 0 | 0 | 0.00000 |
| HETATM | 277 | Pt | 12.50391 | 13.46357 | 24.04708 | Pt | 0 | 0 | 0.00000 |
| HETATM | 278 | Pt | 12.49894 | 16.26115 | 24.07014 | Pt | 0 | 0 | 0.00000 |
| HETATM | 279 | Pt | 12.50594 | 19.04628 | 24.08331 | Pt | 0 | 0 | 0.00000 |
| HETATM | 280 | Pt | 12.51015 | 21.83586 | 24.07819 | Pt | 0 | 0 | 0.00000 |
| HETATM | 281 | Pt | 17.33955 | 27.41940 | 24.07464 | Pt | 0 | 0 | 0.00000 |
| HETATM | 282 | Pt | 17.33268 | 30.21095 | 24.08379 | Pt | 0 | 0 | 0.00000 |
| HETATM | 283 | Pt | 17.33839 | 10.67244 | 24.07380 | Pt | 0 | 0 | 0.00000 |
| HETATM | 284 | Pt | 17.34892 | 13.46310 | 24.05953 | Pt | 0 | 0 | 0.00000 |
| HETATM | 285 | Pt | 17.34376 | 16.25285 | 24.06318 | Pt | 0 | 0 | 0.00000 |
| HETATM | 286 | Pt | 17.33744 | 19.04289 | 24.07311 | Pt | 0 | 0 | 0.00000 |
| HETATM | 287 | Pt | 17.34062 | 21.83376 | 24.07154 | Pt | 0 | 0 | 0.00000 |
| HETATM | 288 | Pt | 17.34071 | 24.62662 | 24.07049 | Pt | 0 | 0 | 0.00000 |
| HETATM | 289 | Pt | 5.24246  | 20.43633 | 24.06629 | Pt | 0 | 0 | 0.00000 |
| HETATM | 290 | Pt | 5.24742  | 23.22672 | 24.06081 | Pt | 0 | 0 | 0.00000 |
| HETATM | 291 | Pt | 5.24892  | 3.68960  | 24.05921 | Pt | 0 | 0 | 0.00000 |
| HETATM | 292 | Pt | 5.24414  | 6.48206  | 24.06528 | Pt | 0 | 0 | 0.00000 |
| HETATM | 293 | Pt | 5.24071  | 9.27102  | 24.06868 | Pt | 0 | 0 | 0.00000 |
| HETATM | 294 | Pt | 5.24388  | 12.06301 | 24.06304 | Pt | 0 | 0 | 0.00000 |
| HETATM | 295 | Pt | 5.24368  | 14.85473 | 24.06425 | Pt | 0 | 0 | 0.00000 |
| HETATM | 296 | Pt | 5.24200  | 17.64567 | 24.06746 | Pt | 0 | 0 | 0.00000 |
| HETATM | 297 | Pt | 10.08224 | 23.22951 | 24.06589 | Pt | 0 | 0 | 0.00000 |
| HETATM | 298 | Pt | 10.08453 | 26.02363 | 24.06562 | Pt | 0 | 0 | 0.00000 |
| HETATM | 299 | Pt | 10.07885 | 6.48574  | 24.07761 | Pt | 0 | 0 | 0.00000 |
| HETATM | 300 | Pt | 10.07429 | 9.27162  | 24.07560 | Pt | 0 | 0 | 0.00000 |
| HETATM | 301 | Pt | 10.07958 | 12.06312 | 24.06315 | Pt | 0 | 0 | 0.00000 |
| HETATM | 302 | Pt | 10.07758 | 14.86514 | 24.07357 | Pt | 0 | 0 | 0.00000 |
| HETATM | 303 | Pt | 10.07827 | 17.64882 | 24.07929 | Pt | 0 | 0 | 0.00000 |
| HETATM | 304 | Pt | 10.07975 | 20.43706 | 24.07295 | Pt | 0 | 0 | 0.00000 |
| HETATM | 305 | Pt | 14.91420 | 26.02562 | 24.06421 | Pt | 0 | 0 | 0.00000 |
| HETATM | 306 | Pt | 14.91127 | 28.82066 | 24.08035 | Pt | 0 | 0 | 0.00000 |
| HETATM | 307 | Pt | 14.91020 | 9.27822  | 24.07914 | Pt | 0 | 0 | 0.00000 |
| HETATM | 308 | Pt | 14.91953 | 12.06715 | 24.04928 | Pt | 0 | 0 | 0.00000 |
| HETATM | 309 | Pt | 14.92099 | 14.85884 | 24.03971 | Pt | 0 | 0 | 0.00000 |
| HETATM | 310 | Pt | 14.90912 | 17.64903 | 24.06611 | Pt | 0 | 0 | 0.00000 |
| HETATM | 311 | Pt | 14.91257 | 20.43880 | 24.06774 | Pt | 0 | 0 | 0.00000 |
| HETATM | 312 | Pt | 14.91370 | 23.23198 | 24.06240 | Pt | 0 | 0 | 0.00000 |
| HETATM | 313 | Pt | 0.40557  | 17.64851 | 24.06883 | Pt | 0 | 0 | 0.00000 |
| HETATM | 314 | Pt | 0.40555  | 20.43863 | 24.06928 | Pt | 0 | 0 | 0.00000 |
| HETATM | 315 | Pt | 0.41478  | 0.89946  | 24.05859 | Pt | 0 | 0 | 0.00000 |
| HETATM | 316 | Pt | 0.41704  | 3.69184  | 24.05584 | Pt | 0 | 0 | 0.00000 |
| HETATM | 317 | Pt | 0.40995  | 6.48210  | 24.06336 | Pt | 0 | 0 | 0.00000 |
| HETATM | 318 | Pt | 0.40690  | 9.27113  | 24.06478 | Pt | 0 | 0 | 0.00000 |
| HETATM | 319 | Pt | 0.40831  | 12.06317 | 24.06229 | Pt | 0 | 0 | 0.00000 |
| HETATM | 320 | Pt | 0.40840  | 14.85576 | 24.06354 | Pt | 0 | 0 | 0.00000 |
| HETATM | 321 | Pt | 3.62612  | 20.43570 | 26.39272 | Pt | 0 | 0 | 0.00000 |
| HETATM | 322 | Pt | 3.63274  | 23.22633 | 26.38461 | Pt | 0 | 0 | 0.00000 |
| HETATM | 323 | Pt | 3.63553  | 3.69244  | 26.38354 | Pt | 0 | 0 | 0.00000 |

|        |     |    |          |          |          |    |   |   |         |
|--------|-----|----|----------|----------|----------|----|---|---|---------|
| HETATM | 324 | Pt | 3.63729  | 6.48905  | 26.39887 | Pt | 0 | 0 | 0.00000 |
| HETATM | 325 | Pt | 3.62748  | 9.27061  | 26.40658 | Pt | 0 | 0 | 0.00000 |
| HETATM | 326 | Pt | 3.63053  | 12.05147 | 26.38873 | Pt | 0 | 0 | 0.00000 |
| HETATM | 327 | Pt | 3.62410  | 14.85151 | 26.37904 | Pt | 0 | 0 | 0.00000 |
| HETATM | 328 | Pt | 3.62325  | 17.64577 | 26.38803 | Pt | 0 | 0 | 0.00000 |
| HETATM | 329 | Pt | 8.46652  | 23.22580 | 26.38976 | Pt | 0 | 0 | 0.00000 |
| HETATM | 330 | Pt | 8.47181  | 26.02394 | 26.38364 | Pt | 0 | 0 | 0.00000 |
| HETATM | 331 | Pt | 8.47511  | 6.49454  | 26.41211 | Pt | 0 | 0 | 0.00000 |
| HETATM | 332 | Pt | 8.45754  | 9.26672  | 26.41222 | Pt | 0 | 0 | 0.00000 |
| HETATM | 333 | Pt | 8.48652  | 12.04649 | 26.41191 | Pt | 0 | 0 | 0.00000 |
| HETATM | 334 | Pt | 8.48338  | 14.84192 | 26.44667 | Pt | 0 | 0 | 0.00000 |
| HETATM | 335 | Pt | 8.46247  | 17.64090 | 26.40415 | Pt | 0 | 0 | 0.00000 |
| HETATM | 336 | Pt | 8.47028  | 20.42811 | 26.40207 | Pt | 0 | 0 | 0.00000 |
| HETATM | 337 | Pt | 13.30017 | 26.03854 | 26.38753 | Pt | 0 | 0 | 0.00000 |
| HETATM | 338 | Pt | 13.30427 | 28.85014 | 26.41704 | Pt | 0 | 0 | 0.00000 |
| HETATM | 339 | Pt | 13.28892 | 9.29935  | 26.39685 | Pt | 0 | 0 | 0.00000 |
| HETATM | 340 | Pt | 13.30888 | 12.06567 | 26.32979 | Pt | 0 | 0 | 0.00000 |
| HETATM | 341 | Pt | 13.32595 | 14.86521 | 26.31015 | Pt | 0 | 0 | 0.00000 |
| HETATM | 342 | Pt | 13.29769 | 17.64137 | 26.40631 | Pt | 0 | 0 | 0.00000 |
| HETATM | 343 | Pt | 13.30544 | 20.43203 | 26.40096 | Pt | 0 | 0 | 0.00000 |
| HETATM | 344 | Pt | 13.29870 | 23.23688 | 26.38810 | Pt | 0 | 0 | 0.00000 |
| HETATM | 345 | Pt | 18.12680 | 28.82328 | 26.38927 | Pt | 0 | 0 | 0.00000 |
| HETATM | 346 | Pt | 18.11984 | 31.61145 | 26.38951 | Pt | 0 | 0 | 0.00000 |
| HETATM | 347 | Pt | 18.14263 | 12.06769 | 26.36948 | Pt | 0 | 0 | 0.00000 |
| HETATM | 348 | Pt | 18.14681 | 14.86345 | 26.36731 | Pt | 0 | 0 | 0.00000 |
| HETATM | 349 | Pt | 18.12819 | 17.64962 | 26.38220 | Pt | 0 | 0 | 0.00000 |
| HETATM | 350 | Pt | 18.13013 | 20.43657 | 26.38805 | Pt | 0 | 0 | 0.00000 |
| HETATM | 351 | Pt | 18.12861 | 23.23215 | 26.38184 | Pt | 0 | 0 | 0.00000 |
| HETATM | 352 | Pt | 18.12892 | 26.02545 | 26.38218 | Pt | 0 | 0 | 0.00000 |
| HETATM | 353 | Pt | 6.07154  | 21.83353 | 26.31233 | Pt | 0 | 0 | 0.00000 |
| HETATM | 354 | Pt | 6.07344  | 24.62111 | 26.30567 | Pt | 0 | 0 | 0.00000 |
| HETATM | 355 | Pt | 6.07578  | 5.08292  | 26.30315 | Pt | 0 | 0 | 0.00000 |
| HETATM | 356 | Pt | 6.06528  | 7.87559  | 26.32364 | Pt | 0 | 0 | 0.00000 |
| HETATM | 357 | Pt | 6.06339  | 10.66100 | 26.31260 | Pt | 0 | 0 | 0.00000 |
| HETATM | 358 | Pt | 6.07302  | 13.45637 | 26.30409 | Pt | 0 | 0 | 0.00000 |
| HETATM | 359 | Pt | 6.06709  | 16.25486 | 26.31611 | Pt | 0 | 0 | 0.00000 |
| HETATM | 360 | Pt | 6.06585  | 19.04512 | 26.31678 | Pt | 0 | 0 | 0.00000 |
| HETATM | 361 | Pt | 10.90694 | 24.62316 | 26.31210 | Pt | 0 | 0 | 0.00000 |
| HETATM | 362 | Pt | 10.91089 | 27.41747 | 26.31859 | Pt | 0 | 0 | 0.00000 |
| HETATM | 363 | Pt | 10.89788 | 7.88433  | 26.34126 | Pt | 0 | 0 | 0.00000 |
| HETATM | 364 | Pt | 10.90324 | 10.66602 | 26.31913 | Pt | 0 | 0 | 0.00000 |
| HETATM | 365 | Pt | 10.89214 | 13.46766 | 26.29719 | Pt | 0 | 0 | 0.00000 |
| HETATM | 366 | Pt | 10.90444 | 16.25074 | 26.35968 | Pt | 0 | 0 | 0.00000 |
| HETATM | 367 | Pt | 10.90715 | 19.03729 | 26.33555 | Pt | 0 | 0 | 0.00000 |
| HETATM | 368 | Pt | 10.90960 | 21.83184 | 26.31627 | Pt | 0 | 0 | 0.00000 |
| HETATM | 369 | Pt | 15.73623 | 27.41948 | 26.31618 | Pt | 0 | 0 | 0.00000 |
| HETATM | 370 | Pt | 15.73047 | 30.21832 | 26.35532 | Pt | 0 | 0 | 0.00000 |
| HETATM | 371 | Pt | 15.73112 | 10.67706 | 26.33321 | Pt | 0 | 0 | 0.00000 |
| HETATM | 372 | Pt | 15.74589 | 13.46792 | 26.29347 | Pt | 0 | 0 | 0.00000 |
| HETATM | 373 | Pt | 15.74243 | 16.25820 | 26.30609 | Pt | 0 | 0 | 0.00000 |
| HETATM | 374 | Pt | 15.73800 | 19.04236 | 26.32715 | Pt | 0 | 0 | 0.00000 |
| HETATM | 375 | Pt | 15.73757 | 21.83786 | 26.31094 | Pt | 0 | 0 | 0.00000 |
| HETATM | 376 | Pt | 15.73481 | 24.62819 | 26.30952 | Pt | 0 | 0 | 0.00000 |
| HETATM | 377 | Pt | 1.22776  | 19.04446 | 26.32451 | Pt | 0 | 0 | 0.00000 |
| HETATM | 378 | Pt | 1.23467  | 21.83532 | 26.31718 | Pt | 0 | 0 | 0.00000 |
| HETATM | 379 | Pt | 1.24278  | 2.29749  | 26.30536 | Pt | 0 | 0 | 0.00000 |
| HETATM | 380 | Pt | 1.24077  | 5.08800  | 26.30968 | Pt | 0 | 0 | 0.00000 |
| HETATM | 381 | Pt | 1.23188  | 7.87844  | 26.31885 | Pt | 0 | 0 | 0.00000 |
| HETATM | 382 | Pt | 1.23004  | 10.66713 | 26.31243 | Pt | 0 | 0 | 0.00000 |
| HETATM | 383 | Pt | 1.23233  | 13.45921 | 26.31119 | Pt | 0 | 0 | 0.00000 |
| HETATM | 384 | Pt | 1.23040  | 16.25072 | 26.31659 | Pt | 0 | 0 | 0.00000 |
| HETATM | 385 | Pt | 2.06353  | 17.63762 | 28.94164 | Pt | 0 | 0 | 0.00000 |
| HETATM | 386 | Pt | 2.08804  | 20.42846 | 28.96437 | Pt | 0 | 0 | 0.00000 |

|        |     |    |          |          |          |    |   |   |         |
|--------|-----|----|----------|----------|----------|----|---|---|---------|
| HETATM | 387 | Pt | 2.08310  | 23.22006 | 28.93143 | Pt | 0 | 0 | 0.00000 |
| HETATM | 388 | Pt | 2.08706  | 3.69260  | 28.93742 | Pt | 0 | 0 | 0.00000 |
| HETATM | 389 | Pt | 2.12056  | 6.48486  | 28.92673 | Pt | 0 | 0 | 0.00000 |
| HETATM | 390 | Pt | 2.08067  | 9.25877  | 28.95627 | Pt | 0 | 0 | 0.00000 |
| HETATM | 391 | Pt | 2.08677  | 12.03661 | 28.91641 | Pt | 0 | 0 | 0.00000 |
| HETATM | 392 | Pt | 2.05727  | 14.83804 | 28.95587 | Pt | 0 | 0 | 0.00000 |
| HETATM | 393 | Pt | 6.94242  | 20.39240 | 28.93399 | Pt | 0 | 0 | 0.00000 |
| HETATM | 394 | Pt | 6.92301  | 23.22235 | 28.95947 | Pt | 0 | 0 | 0.00000 |
| HETATM | 395 | Pt | 6.91690  | 26.05837 | 28.90153 | Pt | 0 | 0 | 0.00000 |
| HETATM | 396 | Pt | 6.94707  | 6.53361  | 28.89993 | Pt | 0 | 0 | 0.00000 |
| HETATM | 397 | Pt | 6.94822  | 9.26268  | 29.62717 | Pt | 0 | 0 | 0.00000 |
| HETATM | 398 | Pt | 6.94188  | 11.97006 | 28.85930 | Pt | 0 | 0 | 0.00000 |
| HETATM | 399 | Pt | 6.88031  | 14.74420 | 28.87182 | Pt | 0 | 0 | 0.00000 |
| HETATM | 400 | Pt | 6.88788  | 17.56315 | 28.98578 | Pt | 0 | 0 | 0.00000 |
| HETATM | 401 | Pt | 11.74515 | 23.28153 | 28.94905 | Pt | 0 | 0 | 0.00000 |
| HETATM | 402 | Pt | 11.73795 | 26.14927 | 28.92249 | Pt | 0 | 0 | 0.00000 |
| HETATM | 403 | Pt | 11.76185 | 28.99300 | 28.92335 | Pt | 0 | 0 | 0.00000 |
| HETATM | 404 | Pt | 11.76388 | 9.41621  | 29.90969 | Pt | 0 | 0 | 0.00000 |
| HETATM | 405 | Pt | 11.71930 | 12.00128 | 28.67917 | Pt | 0 | 0 | 0.00000 |
| HETATM | 406 | Pt | 11.79051 | 14.83749 | 28.75098 | Pt | 0 | 0 | 0.00000 |
| HETATM | 407 | Pt | 11.78718 | 17.64316 | 29.28914 | Pt | 0 | 0 | 0.00000 |
| HETATM | 408 | Pt | 11.76875 | 20.44392 | 28.92517 | Pt | 0 | 0 | 0.00000 |
| HETATM | 409 | Pt | 16.56629 | 26.05536 | 28.92800 | Pt | 0 | 0 | 0.00000 |
| HETATM | 410 | Pt | 16.54741 | 28.86479 | 28.91642 | Pt | 0 | 0 | 0.00000 |
| HETATM | 411 | Pt | 16.58917 | 31.63845 | 29.34903 | Pt | 0 | 0 | 0.00000 |
| HETATM | 412 | Pt | 16.57486 | 12.07817 | 28.83096 | Pt | 0 | 0 | 0.00000 |
| HETATM | 413 | Pt | 16.58996 | 14.84951 | 28.83342 | Pt | 0 | 0 | 0.00000 |
| HETATM | 414 | Pt | 16.59570 | 17.62941 | 29.30017 | Pt | 0 | 0 | 0.00000 |
| HETATM | 415 | Pt | 16.57393 | 20.41540 | 28.92409 | Pt | 0 | 0 | 0.00000 |
| HETATM | 416 | Pt | 16.56761 | 23.22312 | 28.93723 | Pt | 0 | 0 | 0.00000 |
| HETATM | 417 | Pt | 4.45456  | 19.03156 | 28.66336 | Pt | 0 | 0 | 0.00000 |
| HETATM | 418 | Pt | 4.46453  | 21.82580 | 28.65899 | Pt | 0 | 0 | 0.00000 |
| HETATM | 419 | Pt | 4.45970  | 24.62130 | 28.65050 | Pt | 0 | 0 | 0.00000 |
| HETATM | 420 | Pt | 4.47502  | 5.08689  | 28.65013 | Pt | 0 | 0 | 0.00000 |
| HETATM | 421 | Pt | 4.50527  | 7.91074  | 28.69778 | Pt | 0 | 0 | 0.00000 |
| HETATM | 422 | Pt | 4.49420  | 10.64384 | 28.69418 | Pt | 0 | 0 | 0.00000 |
| HETATM | 423 | Pt | 4.43345  | 13.45177 | 28.63536 | Pt | 0 | 0 | 0.00000 |
| HETATM | 424 | Pt | 4.43537  | 16.23734 | 28.65141 | Pt | 0 | 0 | 0.00000 |
| HETATM | 425 | Pt | 9.29932  | 21.82755 | 28.65881 | Pt | 0 | 0 | 0.00000 |
| HETATM | 426 | Pt | 9.28621  | 24.62521 | 28.65657 | Pt | 0 | 0 | 0.00000 |
| HETATM | 427 | Pt | 9.30290  | 27.42192 | 28.65652 | Pt | 0 | 0 | 0.00000 |
| HETATM | 428 | Pt | 9.32489  | 7.93205  | 28.75573 | Pt | 0 | 0 | 0.00000 |
| HETATM | 429 | Pt | 9.35344  | 10.55845 | 28.71528 | Pt | 0 | 0 | 0.00000 |
| HETATM | 430 | Pt | 9.37988  | 13.45991 | 28.92126 | Pt | 0 | 0 | 0.00000 |
| HETATM | 431 | Pt | 9.29131  | 16.25687 | 28.75880 | Pt | 0 | 0 | 0.00000 |
| HETATM | 432 | Pt | 9.30830  | 19.00164 | 28.69426 | Pt | 0 | 0 | 0.00000 |
| HETATM | 433 | Pt | 14.10194 | 24.66032 | 28.65801 | Pt | 0 | 0 | 0.00000 |
| HETATM | 434 | Pt | 14.11102 | 27.46937 | 28.65512 | Pt | 0 | 0 | 0.00000 |
| HETATM | 435 | Pt | 14.09505 | 30.38303 | 28.75444 | Pt | 0 | 0 | 0.00000 |
| HETATM | 436 | Pt | 14.08779 | 10.70701 | 28.73533 | Pt | 0 | 0 | 0.00000 |
| HETATM | 437 | Pt | 14.15789 | 13.45596 | 28.52170 | Pt | 0 | 0 | 0.00000 |
| HETATM | 438 | Pt | 14.15050 | 16.24430 | 28.70271 | Pt | 0 | 0 | 0.00000 |
| HETATM | 439 | Pt | 14.13978 | 18.99120 | 28.69031 | Pt | 0 | 0 | 0.00000 |
| HETATM | 440 | Pt | 14.11808 | 21.85037 | 28.65264 | Pt | 0 | 0 | 0.00000 |
| HETATM | 441 | Pt | 18.93527 | 27.43759 | 28.64835 | Pt | 0 | 0 | 0.00000 |
| HETATM | 442 | Pt | 18.93209 | 30.24948 | 28.67424 | Pt | 0 | 0 | 0.00000 |
| HETATM | 443 | Pt | 18.94495 | 32.98402 | 28.66388 | Pt | 0 | 0 | 0.00000 |
| HETATM | 444 | Pt | 18.96923 | 13.46565 | 28.63152 | Pt | 0 | 0 | 0.00000 |
| HETATM | 445 | Pt | 18.95765 | 16.28389 | 28.65694 | Pt | 0 | 0 | 0.00000 |
| HETATM | 446 | Pt | 18.94849 | 19.02157 | 28.66825 | Pt | 0 | 0 | 0.00000 |
| HETATM | 447 | Pt | 18.94754 | 21.83787 | 28.64929 | Pt | 0 | 0 | 0.00000 |
| HETATM | 448 | Pt | 18.93807 | 24.63288 | 28.65343 | Pt | 0 | 0 | 0.00000 |
| HETATM | 449 | O  | 3.05278  | 19.03330 | 29.96172 | O  | 0 | 0 | 0.00000 |

|        |     |   |          |          |          |   |   |   |         |
|--------|-----|---|----------|----------|----------|---|---|---|---------|
| HETATM | 450 | O | 3.06149  | 21.84111 | 29.95723 | O | 0 | 0 | 0.00000 |
| HETATM | 451 | O | 3.05992  | 2.29526  | 29.94426 | O | 0 | 0 | 0.00000 |
| HETATM | 452 | O | 3.07667  | 5.09306  | 29.94597 | O | 0 | 0 | 0.00000 |
| HETATM | 453 | O | 3.05716  | 7.86412  | 29.96681 | O | 0 | 0 | 0.00000 |
| HETATM | 454 | O | 3.03944  | 10.68306 | 29.96198 | O | 0 | 0 | 0.00000 |
| HETATM | 455 | O | 3.05220  | 13.44328 | 29.94155 | O | 0 | 0 | 0.00000 |
| HETATM | 456 | O | 3.04147  | 16.24918 | 29.95310 | O | 0 | 0 | 0.00000 |
| HETATM | 457 | O | 7.91002  | 21.81756 | 29.95488 | O | 0 | 0 | 0.00000 |
| HETATM | 458 | O | 7.89487  | 24.63780 | 29.94440 | O | 0 | 0 | 0.00000 |
| HETATM | 459 | O | 7.85836  | 5.08624  | 29.92586 | O | 0 | 0 | 0.00000 |
| HETATM | 460 | O | 8.00512  | 7.66629  | 30.11100 | O | 0 | 0 | 0.00000 |
| HETATM | 461 | O | 8.03705  | 10.85927 | 30.06811 | O | 0 | 0 | 0.00000 |
| HETATM | 462 | O | 7.59544  | 13.40088 | 30.01292 | O | 0 | 0 | 0.00000 |
| HETATM | 463 | O | 7.77483  | 16.20988 | 29.99109 | O | 0 | 0 | 0.00000 |
| HETATM | 464 | O | 7.89560  | 19.05353 | 29.97537 | O | 0 | 0 | 0.00000 |
| HETATM | 465 | O | 12.72082 | 24.66019 | 29.94526 | O | 0 | 0 | 0.00000 |
| HETATM | 466 | O | 12.67841 | 27.47852 | 29.92822 | O | 0 | 0 | 0.00000 |
| HETATM | 467 | O | 12.85580 | 7.72019  | 30.14265 | O | 0 | 0 | 0.00000 |
| HETATM | 468 | O | 12.77428 | 11.16645 | 30.03580 | O | 0 | 0 | 0.00000 |
| HETATM | 469 | O | 10.46851 | 14.39438 | 30.04237 | O | 0 | 0 | 0.00000 |
| HETATM | 470 | O | 12.81333 | 16.02851 | 29.98531 | O | 0 | 0 | 0.00000 |
| HETATM | 471 | O | 12.80192 | 19.11971 | 30.03529 | O | 0 | 0 | 0.00000 |
| HETATM | 472 | O | 12.71897 | 21.83006 | 29.94293 | O | 0 | 0 | 0.00000 |
| HETATM | 473 | O | 17.51730 | 27.44320 | 29.93287 | O | 0 | 0 | 0.00000 |
| HETATM | 474 | O | 17.61190 | 30.11439 | 30.04238 | O | 0 | 0 | 0.00000 |
| HETATM | 475 | O | 17.62243 | 10.83786 | 30.01387 | O | 0 | 0 | 0.00000 |
| HETATM | 476 | O | 17.47868 | 13.46892 | 29.87642 | O | 0 | 0 | 0.00000 |
| HETATM | 477 | O | 17.63128 | 16.12120 | 30.00183 | O | 0 | 0 | 0.00000 |
| HETATM | 478 | O | 17.62251 | 19.14780 | 30.03189 | O | 0 | 0 | 0.00000 |
| HETATM | 479 | O | 17.53291 | 21.83463 | 29.94055 | O | 0 | 0 | 0.00000 |
| HETATM | 480 | O | 17.54876 | 24.63958 | 29.94510 | O | 0 | 0 | 0.00000 |

UNIT ENERGY kcal  
ENERGY -60128.119894  
END

XTLGRF 200  
DESCRP FS  
REMARK Pt111\_0.50ML\_8x8x7\_30.0\_vac fcc-displacement  
FIXATOMS 1 128  
CRYSTX 22.32968 22.32968 43.67409 90.00000 90.00000 60.00000  
FORMAT ATOM (a6,lx,i5,lx,a5,lx,a3,lx,a1,lx,a5,3f10.5,lx,a5,i3,i2,lx,f8.5)  

|        |    |    |          |          |          |    |   |   |         |
|--------|----|----|----------|----------|----------|----|---|---|---------|
| HETATM | 1  | Pt | 2.02016  | 17.64733 | 14.95089 | Pt | 0 | 0 | 0.00000 |
| HETATM | 2  | Pt | 2.02016  | 20.43854 | 14.95089 | Pt | 0 | 0 | 0.00000 |
| HETATM | 3  | Pt | 2.02016  | 23.22975 | 14.95089 | Pt | 0 | 0 | 0.00000 |
| HETATM | 4  | Pt | 2.02016  | 3.69128  | 14.95089 | Pt | 0 | 0 | 0.00000 |
| HETATM | 5  | Pt | 2.02016  | 6.48249  | 14.95089 | Pt | 0 | 0 | 0.00000 |
| HETATM | 6  | Pt | 2.02016  | 9.27370  | 14.95089 | Pt | 0 | 0 | 0.00000 |
| HETATM | 7  | Pt | 2.02016  | 12.06491 | 14.95089 | Pt | 0 | 0 | 0.00000 |
| HETATM | 8  | Pt | 2.02016  | 14.85612 | 14.95089 | Pt | 0 | 0 | 0.00000 |
| HETATM | 9  | Pt | 6.85468  | 20.43854 | 14.95089 | Pt | 0 | 0 | 0.00000 |
| HETATM | 10 | Pt | 6.85468  | 23.22975 | 14.95089 | Pt | 0 | 0 | 0.00000 |
| HETATM | 11 | Pt | 6.85468  | 26.02096 | 14.95089 | Pt | 0 | 0 | 0.00000 |
| HETATM | 12 | Pt | 6.85468  | 6.48249  | 14.95089 | Pt | 0 | 0 | 0.00000 |
| HETATM | 13 | Pt | 6.85468  | 9.27370  | 14.95089 | Pt | 0 | 0 | 0.00000 |
| HETATM | 14 | Pt | 6.85468  | 12.06491 | 14.95089 | Pt | 0 | 0 | 0.00000 |
| HETATM | 15 | Pt | 6.85468  | 14.85612 | 14.95089 | Pt | 0 | 0 | 0.00000 |
| HETATM | 16 | Pt | 6.85468  | 17.64733 | 14.95089 | Pt | 0 | 0 | 0.00000 |
| HETATM | 17 | Pt | 11.68920 | 23.22975 | 14.95089 | Pt | 0 | 0 | 0.00000 |
| HETATM | 18 | Pt | 11.68920 | 26.02096 | 14.95089 | Pt | 0 | 0 | 0.00000 |
| HETATM | 19 | Pt | 11.68920 | 28.81217 | 14.95089 | Pt | 0 | 0 | 0.00000 |
| HETATM | 20 | Pt | 11.68920 | 9.27370  | 14.95089 | Pt | 0 | 0 | 0.00000 |
| HETATM | 21 | Pt | 11.68920 | 12.06491 | 14.95089 | Pt | 0 | 0 | 0.00000 |
| HETATM | 22 | Pt | 11.68920 | 14.85612 | 14.95089 | Pt | 0 | 0 | 0.00000 |



|        |    |    |          |          |          |    |   |   |         |
|--------|----|----|----------|----------|----------|----|---|---|---------|
| HETATM | 23 | Pt | 11.68920 | 17.64733 | 14.95089 | Pt | 0 | 0 | 0.00000 |
| HETATM | 24 | Pt | 11.68920 | 20.43854 | 14.95089 | Pt | 0 | 0 | 0.00000 |
| HETATM | 25 | Pt | 16.52371 | 26.02096 | 14.95089 | Pt | 0 | 0 | 0.00000 |
| HETATM | 26 | Pt | 16.52371 | 28.81217 | 14.95089 | Pt | 0 | 0 | 0.00000 |
| HETATM | 27 | Pt | 16.52371 | 31.60338 | 14.95089 | Pt | 0 | 0 | 0.00000 |
| HETATM | 28 | Pt | 16.52371 | 12.06491 | 14.95089 | Pt | 0 | 0 | 0.00000 |
| HETATM | 29 | Pt | 16.52371 | 14.85612 | 14.95089 | Pt | 0 | 0 | 0.00000 |
| HETATM | 30 | Pt | 16.52371 | 17.64733 | 14.95089 | Pt | 0 | 0 | 0.00000 |
| HETATM | 31 | Pt | 16.52371 | 20.43854 | 14.95089 | Pt | 0 | 0 | 0.00000 |
| HETATM | 32 | Pt | 16.52371 | 23.22975 | 14.95089 | Pt | 0 | 0 | 0.00000 |
| HETATM | 33 | Pt | 4.43742  | 19.04294 | 14.95089 | Pt | 0 | 0 | 0.00000 |
| HETATM | 34 | Pt | 4.43742  | 21.83415 | 14.95089 | Pt | 0 | 0 | 0.00000 |
| HETATM | 35 | Pt | 4.43742  | 24.62536 | 14.95089 | Pt | 0 | 0 | 0.00000 |
| HETATM | 36 | Pt | 4.43742  | 5.08689  | 14.95089 | Pt | 0 | 0 | 0.00000 |
| HETATM | 37 | Pt | 4.43742  | 7.87810  | 14.95089 | Pt | 0 | 0 | 0.00000 |
| HETATM | 38 | Pt | 4.43742  | 10.66931 | 14.95089 | Pt | 0 | 0 | 0.00000 |
| HETATM | 39 | Pt | 4.43742  | 13.46052 | 14.95089 | Pt | 0 | 0 | 0.00000 |
| HETATM | 40 | Pt | 4.43742  | 16.25173 | 14.95089 | Pt | 0 | 0 | 0.00000 |
| HETATM | 41 | Pt | 9.27194  | 21.83415 | 14.95089 | Pt | 0 | 0 | 0.00000 |
| HETATM | 42 | Pt | 9.27194  | 24.62536 | 14.95089 | Pt | 0 | 0 | 0.00000 |
| HETATM | 43 | Pt | 9.27194  | 27.41657 | 14.95089 | Pt | 0 | 0 | 0.00000 |
| HETATM | 44 | Pt | 9.27194  | 7.87810  | 14.95089 | Pt | 0 | 0 | 0.00000 |
| HETATM | 45 | Pt | 9.27194  | 10.66931 | 14.95089 | Pt | 0 | 0 | 0.00000 |
| HETATM | 46 | Pt | 9.27194  | 13.46052 | 14.95089 | Pt | 0 | 0 | 0.00000 |
| HETATM | 47 | Pt | 9.27194  | 16.25173 | 14.95089 | Pt | 0 | 0 | 0.00000 |
| HETATM | 48 | Pt | 9.27194  | 19.04294 | 14.95089 | Pt | 0 | 0 | 0.00000 |
| HETATM | 49 | Pt | 14.10646 | 24.62536 | 14.95089 | Pt | 0 | 0 | 0.00000 |
| HETATM | 50 | Pt | 14.10646 | 27.41657 | 14.95089 | Pt | 0 | 0 | 0.00000 |
| HETATM | 51 | Pt | 14.10646 | 30.20778 | 14.95089 | Pt | 0 | 0 | 0.00000 |
| HETATM | 52 | Pt | 14.10646 | 10.66931 | 14.95089 | Pt | 0 | 0 | 0.00000 |
| HETATM | 53 | Pt | 14.10646 | 13.46052 | 14.95089 | Pt | 0 | 0 | 0.00000 |
| HETATM | 54 | Pt | 14.10646 | 16.25173 | 14.95089 | Pt | 0 | 0 | 0.00000 |
| HETATM | 55 | Pt | 14.10646 | 19.04294 | 14.95089 | Pt | 0 | 0 | 0.00000 |
| HETATM | 56 | Pt | 14.10646 | 21.83415 | 14.95089 | Pt | 0 | 0 | 0.00000 |
| HETATM | 57 | Pt | 18.94097 | 27.41657 | 14.95089 | Pt | 0 | 0 | 0.00000 |
| HETATM | 58 | Pt | 18.94097 | 30.20778 | 14.95089 | Pt | 0 | 0 | 0.00000 |
| HETATM | 59 | Pt | 18.94097 | 32.99899 | 14.95089 | Pt | 0 | 0 | 0.00000 |
| HETATM | 60 | Pt | 18.94097 | 13.46052 | 14.95089 | Pt | 0 | 0 | 0.00000 |
| HETATM | 61 | Pt | 18.94097 | 16.25173 | 14.95089 | Pt | 0 | 0 | 0.00000 |
| HETATM | 62 | Pt | 18.94097 | 19.04294 | 14.95089 | Pt | 0 | 0 | 0.00000 |
| HETATM | 63 | Pt | 18.94097 | 21.83415 | 14.95089 | Pt | 0 | 0 | 0.00000 |
| HETATM | 64 | Pt | 18.94097 | 24.62536 | 14.95089 | Pt | 0 | 0 | 0.00000 |
| HETATM | 65 | Pt | 2.82591  | 19.04294 | 17.22991 | Pt | 0 | 0 | 0.00000 |
| HETATM | 66 | Pt | 2.82591  | 21.83415 | 17.22991 | Pt | 0 | 0 | 0.00000 |
| HETATM | 67 | Pt | 2.82591  | 2.29568  | 17.22991 | Pt | 0 | 0 | 0.00000 |
| HETATM | 68 | Pt | 2.82591  | 5.08689  | 17.22991 | Pt | 0 | 0 | 0.00000 |
| HETATM | 69 | Pt | 2.82591  | 7.87810  | 17.22991 | Pt | 0 | 0 | 0.00000 |
| HETATM | 70 | Pt | 2.82591  | 10.66931 | 17.22991 | Pt | 0 | 0 | 0.00000 |
| HETATM | 71 | Pt | 2.82591  | 13.46052 | 17.22991 | Pt | 0 | 0 | 0.00000 |
| HETATM | 72 | Pt | 2.82591  | 16.25173 | 17.22991 | Pt | 0 | 0 | 0.00000 |
| HETATM | 73 | Pt | 7.66043  | 21.83415 | 17.22991 | Pt | 0 | 0 | 0.00000 |
| HETATM | 74 | Pt | 7.66043  | 24.62536 | 17.22991 | Pt | 0 | 0 | 0.00000 |
| HETATM | 75 | Pt | 7.66043  | 5.08689  | 17.22991 | Pt | 0 | 0 | 0.00000 |
| HETATM | 76 | Pt | 7.66043  | 7.87810  | 17.22991 | Pt | 0 | 0 | 0.00000 |
| HETATM | 77 | Pt | 7.66043  | 10.66931 | 17.22991 | Pt | 0 | 0 | 0.00000 |
| HETATM | 78 | Pt | 7.66043  | 13.46052 | 17.22991 | Pt | 0 | 0 | 0.00000 |
| HETATM | 79 | Pt | 7.66043  | 16.25173 | 17.22991 | Pt | 0 | 0 | 0.00000 |
| HETATM | 80 | Pt | 7.66043  | 19.04294 | 17.22991 | Pt | 0 | 0 | 0.00000 |
| HETATM | 81 | Pt | 12.49495 | 24.62536 | 17.22991 | Pt | 0 | 0 | 0.00000 |
| HETATM | 82 | Pt | 12.49495 | 27.41657 | 17.22991 | Pt | 0 | 0 | 0.00000 |
| HETATM | 83 | Pt | 12.49495 | 7.87810  | 17.22991 | Pt | 0 | 0 | 0.00000 |
| HETATM | 84 | Pt | 12.49495 | 10.66931 | 17.22991 | Pt | 0 | 0 | 0.00000 |
| HETATM | 85 | Pt | 12.49495 | 13.46052 | 17.22991 | Pt | 0 | 0 | 0.00000 |

|        |     |    |          |          |          |    |   |   |         |
|--------|-----|----|----------|----------|----------|----|---|---|---------|
| HETATM | 86  | Pt | 12.49495 | 16.25173 | 17.22991 | Pt | 0 | 0 | 0.00000 |
| HETATM | 87  | Pt | 12.49495 | 19.04294 | 17.22991 | Pt | 0 | 0 | 0.00000 |
| HETATM | 88  | Pt | 12.49495 | 21.83415 | 17.22991 | Pt | 0 | 0 | 0.00000 |
| HETATM | 89  | Pt | 17.32946 | 27.41657 | 17.22991 | Pt | 0 | 0 | 0.00000 |
| HETATM | 90  | Pt | 17.32946 | 30.20778 | 17.22991 | Pt | 0 | 0 | 0.00000 |
| HETATM | 91  | Pt | 17.32946 | 10.66931 | 17.22991 | Pt | 0 | 0 | 0.00000 |
| HETATM | 92  | Pt | 17.32946 | 13.46052 | 17.22991 | Pt | 0 | 0 | 0.00000 |
| HETATM | 93  | Pt | 17.32946 | 16.25173 | 17.22991 | Pt | 0 | 0 | 0.00000 |
| HETATM | 94  | Pt | 17.32946 | 19.04294 | 17.22991 | Pt | 0 | 0 | 0.00000 |
| HETATM | 95  | Pt | 17.32946 | 21.83415 | 17.22991 | Pt | 0 | 0 | 0.00000 |
| HETATM | 96  | Pt | 17.32946 | 24.62536 | 17.22991 | Pt | 0 | 0 | 0.00000 |
| HETATM | 97  | Pt | 5.24317  | 20.43854 | 17.22991 | Pt | 0 | 0 | 0.00000 |
| HETATM | 98  | Pt | 5.24317  | 23.22975 | 17.22991 | Pt | 0 | 0 | 0.00000 |
| HETATM | 99  | Pt | 5.24317  | 3.69128  | 17.22991 | Pt | 0 | 0 | 0.00000 |
| HETATM | 100 | Pt | 5.24317  | 6.48249  | 17.22991 | Pt | 0 | 0 | 0.00000 |
| HETATM | 101 | Pt | 5.24317  | 9.27370  | 17.22991 | Pt | 0 | 0 | 0.00000 |
| HETATM | 102 | Pt | 5.24317  | 12.06491 | 17.22991 | Pt | 0 | 0 | 0.00000 |
| HETATM | 103 | Pt | 5.24317  | 14.85612 | 17.22991 | Pt | 0 | 0 | 0.00000 |
| HETATM | 104 | Pt | 5.24317  | 17.64733 | 17.22991 | Pt | 0 | 0 | 0.00000 |
| HETATM | 105 | Pt | 10.07769 | 23.22975 | 17.22991 | Pt | 0 | 0 | 0.00000 |
| HETATM | 106 | Pt | 10.07769 | 26.02096 | 17.22991 | Pt | 0 | 0 | 0.00000 |
| HETATM | 107 | Pt | 10.07769 | 6.48249  | 17.22991 | Pt | 0 | 0 | 0.00000 |
| HETATM | 108 | Pt | 10.07769 | 9.27370  | 17.22991 | Pt | 0 | 0 | 0.00000 |
| HETATM | 109 | Pt | 10.07769 | 12.06491 | 17.22991 | Pt | 0 | 0 | 0.00000 |
| HETATM | 110 | Pt | 10.07769 | 14.85612 | 17.22991 | Pt | 0 | 0 | 0.00000 |
| HETATM | 111 | Pt | 10.07769 | 17.64733 | 17.22991 | Pt | 0 | 0 | 0.00000 |
| HETATM | 112 | Pt | 10.07769 | 20.43854 | 17.22991 | Pt | 0 | 0 | 0.00000 |
| HETATM | 113 | Pt | 14.91221 | 26.02096 | 17.22991 | Pt | 0 | 0 | 0.00000 |
| HETATM | 114 | Pt | 14.91221 | 28.81217 | 17.22991 | Pt | 0 | 0 | 0.00000 |
| HETATM | 115 | Pt | 14.91221 | 9.27370  | 17.22991 | Pt | 0 | 0 | 0.00000 |
| HETATM | 116 | Pt | 14.91221 | 12.06491 | 17.22991 | Pt | 0 | 0 | 0.00000 |
| HETATM | 117 | Pt | 14.91221 | 14.85612 | 17.22991 | Pt | 0 | 0 | 0.00000 |
| HETATM | 118 | Pt | 14.91221 | 17.64733 | 17.22991 | Pt | 0 | 0 | 0.00000 |
| HETATM | 119 | Pt | 14.91221 | 20.43854 | 17.22991 | Pt | 0 | 0 | 0.00000 |
| HETATM | 120 | Pt | 14.91221 | 23.22975 | 17.22991 | Pt | 0 | 0 | 0.00000 |
| HETATM | 121 | Pt | 0.40865  | 17.64733 | 17.22991 | Pt | 0 | 0 | 0.00000 |
| HETATM | 122 | Pt | 0.40865  | 20.43854 | 17.22991 | Pt | 0 | 0 | 0.00000 |
| HETATM | 123 | Pt | 0.40865  | 0.90007  | 17.22991 | Pt | 0 | 0 | 0.00000 |
| HETATM | 124 | Pt | 0.40865  | 3.69128  | 17.22991 | Pt | 0 | 0 | 0.00000 |
| HETATM | 125 | Pt | 0.40865  | 6.48249  | 17.22991 | Pt | 0 | 0 | 0.00000 |
| HETATM | 126 | Pt | 0.40865  | 9.27370  | 17.22991 | Pt | 0 | 0 | 0.00000 |
| HETATM | 127 | Pt | 0.40865  | 12.06491 | 17.22991 | Pt | 0 | 0 | 0.00000 |
| HETATM | 128 | Pt | 0.40865  | 14.85612 | 17.22991 | Pt | 0 | 0 | 0.00000 |
| HETATM | 129 | Pt | 3.63207  | 20.43679 | 19.51084 | Pt | 0 | 0 | 0.00000 |
| HETATM | 130 | Pt | 3.63465  | 23.22831 | 19.50866 | Pt | 0 | 0 | 0.00000 |
| HETATM | 131 | Pt | 3.63555  | 3.69049  | 19.50808 | Pt | 0 | 0 | 0.00000 |
| HETATM | 132 | Pt | 3.63403  | 6.48201  | 19.50974 | Pt | 0 | 0 | 0.00000 |
| HETATM | 133 | Pt | 3.63319  | 9.27285  | 19.51057 | Pt | 0 | 0 | 0.00000 |
| HETATM | 134 | Pt | 3.63289  | 12.06380 | 19.50990 | Pt | 0 | 0 | 0.00000 |
| HETATM | 135 | Pt | 3.63224  | 14.85527 | 19.50992 | Pt | 0 | 0 | 0.00000 |
| HETATM | 136 | Pt | 3.63157  | 17.64617 | 19.51099 | Pt | 0 | 0 | 0.00000 |
| HETATM | 137 | Pt | 8.46985  | 23.23060 | 19.51083 | Pt | 0 | 0 | 0.00000 |
| HETATM | 138 | Pt | 8.47042  | 26.02260 | 19.51107 | Pt | 0 | 0 | 0.00000 |
| HETATM | 139 | Pt | 8.46861  | 6.48347  | 19.51360 | Pt | 0 | 0 | 0.00000 |
| HETATM | 140 | Pt | 8.46744  | 9.27340  | 19.51522 | Pt | 0 | 0 | 0.00000 |
| HETATM | 141 | Pt | 8.46843  | 12.06506 | 19.51525 | Pt | 0 | 0 | 0.00000 |
| HETATM | 142 | Pt | 8.46787  | 14.85650 | 19.51537 | Pt | 0 | 0 | 0.00000 |
| HETATM | 143 | Pt | 8.46718  | 17.64773 | 19.51469 | Pt | 0 | 0 | 0.00000 |
| HETATM | 144 | Pt | 8.46808  | 20.43899 | 19.51268 | Pt | 0 | 0 | 0.00000 |
| HETATM | 145 | Pt | 13.30342 | 26.02290 | 19.51291 | Pt | 0 | 0 | 0.00000 |
| HETATM | 146 | Pt | 13.30084 | 28.81298 | 19.51611 | Pt | 0 | 0 | 0.00000 |
| HETATM | 147 | Pt | 13.29958 | 9.27210  | 19.51345 | Pt | 0 | 0 | 0.00000 |
| HETATM | 148 | Pt | 13.30028 | 12.06326 | 19.50699 | Pt | 0 | 0 | 0.00000 |

|        |     |    |          |          |          |    |   |   |         |
|--------|-----|----|----------|----------|----------|----|---|---|---------|
| HETATM | 149 | Pt | 13.29935 | 14.85670 | 19.50763 | Pt | 0 | 0 | 0.00000 |
| HETATM | 150 | Pt | 13.29965 | 17.64911 | 19.51011 | Pt | 0 | 0 | 0.00000 |
| HETATM | 151 | Pt | 13.30140 | 20.44015 | 19.51140 | Pt | 0 | 0 | 0.00000 |
| HETATM | 152 | Pt | 13.30320 | 23.23130 | 19.51133 | Pt | 0 | 0 | 0.00000 |
| HETATM | 153 | Pt | 18.13375 | 28.81200 | 19.51348 | Pt | 0 | 0 | 0.00000 |
| HETATM | 154 | Pt | 18.13394 | 31.60240 | 19.51304 | Pt | 0 | 0 | 0.00000 |
| HETATM | 155 | Pt | 18.13698 | 12.06352 | 19.50802 | Pt | 0 | 0 | 0.00000 |
| HETATM | 156 | Pt | 18.13774 | 14.85512 | 19.50582 | Pt | 0 | 0 | 0.00000 |
| HETATM | 157 | Pt | 18.13589 | 17.64614 | 19.50860 | Pt | 0 | 0 | 0.00000 |
| HETATM | 158 | Pt | 18.13605 | 20.43711 | 19.50979 | Pt | 0 | 0 | 0.00000 |
| HETATM | 159 | Pt | 18.13651 | 23.22865 | 19.51018 | Pt | 0 | 0 | 0.00000 |
| HETATM | 160 | Pt | 18.13578 | 26.02040 | 19.51112 | Pt | 0 | 0 | 0.00000 |
| HETATM | 161 | Pt | 6.05206  | 21.83325 | 19.51159 | Pt | 0 | 0 | 0.00000 |
| HETATM | 162 | Pt | 6.05394  | 24.62555 | 19.51045 | Pt | 0 | 0 | 0.00000 |
| HETATM | 163 | Pt | 6.05330  | 5.08772  | 19.51123 | Pt | 0 | 0 | 0.00000 |
| HETATM | 164 | Pt | 6.05171  | 7.87867  | 19.51344 | Pt | 0 | 0 | 0.00000 |
| HETATM | 165 | Pt | 6.05200  | 10.66942 | 19.51438 | Pt | 0 | 0 | 0.00000 |
| HETATM | 166 | Pt | 6.05200  | 13.45989 | 19.51390 | Pt | 0 | 0 | 0.00000 |
| HETATM | 167 | Pt | 6.05122  | 16.25037 | 19.51449 | Pt | 0 | 0 | 0.00000 |
| HETATM | 168 | Pt | 6.05077  | 19.04143 | 19.51388 | Pt | 0 | 0 | 0.00000 |
| HETATM | 169 | Pt | 10.88785 | 24.62748 | 19.51241 | Pt | 0 | 0 | 0.00000 |
| HETATM | 170 | Pt | 10.88663 | 27.41807 | 19.51458 | Pt | 0 | 0 | 0.00000 |
| HETATM | 171 | Pt | 10.88383 | 7.87726  | 19.51611 | Pt | 0 | 0 | 0.00000 |
| HETATM | 172 | Pt | 10.88343 | 10.66763 | 19.51271 | Pt | 0 | 0 | 0.00000 |
| HETATM | 173 | Pt | 10.88355 | 13.46136 | 19.51179 | Pt | 0 | 0 | 0.00000 |
| HETATM | 174 | Pt | 10.88320 | 16.25400 | 19.51343 | Pt | 0 | 0 | 0.00000 |
| HETATM | 175 | Pt | 10.88429 | 19.04534 | 19.51368 | Pt | 0 | 0 | 0.00000 |
| HETATM | 176 | Pt | 10.88631 | 21.83615 | 19.51299 | Pt | 0 | 0 | 0.00000 |
| HETATM | 177 | Pt | 15.71882 | 27.41751 | 19.51483 | Pt | 0 | 0 | 0.00000 |
| HETATM | 178 | Pt | 15.71683 | 30.20773 | 19.51654 | Pt | 0 | 0 | 0.00000 |
| HETATM | 179 | Pt | 15.71838 | 10.66780 | 19.51115 | Pt | 0 | 0 | 0.00000 |
| HETATM | 180 | Pt | 15.71928 | 13.45934 | 19.50630 | Pt | 0 | 0 | 0.00000 |
| HETATM | 181 | Pt | 15.71802 | 16.25168 | 19.50810 | Pt | 0 | 0 | 0.00000 |
| HETATM | 182 | Pt | 15.71847 | 19.04296 | 19.51091 | Pt | 0 | 0 | 0.00000 |
| HETATM | 183 | Pt | 15.71986 | 21.83412 | 19.51161 | Pt | 0 | 0 | 0.00000 |
| HETATM | 184 | Pt | 15.72033 | 24.62571 | 19.51202 | Pt | 0 | 0 | 0.00000 |
| HETATM | 185 | Pt | 1.21350  | 19.04185 | 19.51340 | Pt | 0 | 0 | 0.00000 |
| HETATM | 186 | Pt | 1.21582  | 21.83270 | 19.51160 | Pt | 0 | 0 | 0.00000 |
| HETATM | 187 | Pt | 1.21855  | 2.29461  | 19.50903 | Pt | 0 | 0 | 0.00000 |
| HETATM | 188 | Pt | 1.21816  | 5.08601  | 19.50986 | Pt | 0 | 0 | 0.00000 |
| HETATM | 189 | Pt | 1.21653  | 7.87655  | 19.51172 | Pt | 0 | 0 | 0.00000 |
| HETATM | 190 | Pt | 1.21637  | 10.66733 | 19.51156 | Pt | 0 | 0 | 0.00000 |
| HETATM | 191 | Pt | 1.21586  | 13.45886 | 19.51163 | Pt | 0 | 0 | 0.00000 |
| HETATM | 192 | Pt | 1.21457  | 16.25065 | 19.51215 | Pt | 0 | 0 | 0.00000 |
| HETATM | 193 | Pt | 2.02252  | 17.64588 | 21.79531 | Pt | 0 | 0 | 0.00000 |
| HETATM | 194 | Pt | 2.02356  | 20.43647 | 21.79572 | Pt | 0 | 0 | 0.00000 |
| HETATM | 195 | Pt | 2.02969  | 23.22787 | 21.79086 | Pt | 0 | 0 | 0.00000 |
| HETATM | 196 | Pt | 2.03206  | 3.68979  | 21.78993 | Pt | 0 | 0 | 0.00000 |
| HETATM | 197 | Pt | 2.02849  | 6.48075  | 21.79412 | Pt | 0 | 0 | 0.00000 |
| HETATM | 198 | Pt | 2.02608  | 9.27023  | 21.79552 | Pt | 0 | 0 | 0.00000 |
| HETATM | 199 | Pt | 2.02576  | 12.06087 | 21.79404 | Pt | 0 | 0 | 0.00000 |
| HETATM | 200 | Pt | 2.02447  | 14.85360 | 21.79375 | Pt | 0 | 0 | 0.00000 |
| HETATM | 201 | Pt | 6.86150  | 20.43650 | 21.79643 | Pt | 0 | 0 | 0.00000 |
| HETATM | 202 | Pt | 6.86493  | 23.22864 | 21.79274 | Pt | 0 | 0 | 0.00000 |
| HETATM | 203 | Pt | 6.86619  | 26.02224 | 21.79243 | Pt | 0 | 0 | 0.00000 |
| HETATM | 204 | Pt | 6.86240  | 6.48381  | 21.79719 | Pt | 0 | 0 | 0.00000 |
| HETATM | 205 | Pt | 6.86042  | 9.27399  | 21.80180 | Pt | 0 | 0 | 0.00000 |
| HETATM | 206 | Pt | 6.86357  | 12.06532 | 21.80135 | Pt | 0 | 0 | 0.00000 |
| HETATM | 207 | Pt | 6.86266  | 14.85372 | 21.80195 | Pt | 0 | 0 | 0.00000 |
| HETATM | 208 | Pt | 6.86082  | 17.64388 | 21.80108 | Pt | 0 | 0 | 0.00000 |
| HETATM | 209 | Pt | 11.69834 | 23.23411 | 21.79609 | Pt | 0 | 0 | 0.00000 |
| HETATM | 210 | Pt | 11.69955 | 26.02579 | 21.79820 | Pt | 0 | 0 | 0.00000 |
| HETATM | 211 | Pt | 11.69370 | 28.81438 | 21.80474 | Pt | 0 | 0 | 0.00000 |

|        |     |    |          |          |          |    |   |   |         |
|--------|-----|----|----------|----------|----------|----|---|---|---------|
| HETATM | 212 | Pt | 11.69053 | 9.27193  | 21.79814 | Pt | 0 | 0 | 0.00000 |
| HETATM | 213 | Pt | 11.69183 | 12.06527 | 21.78681 | Pt | 0 | 0 | 0.00000 |
| HETATM | 214 | Pt | 11.69051 | 14.86146 | 21.79289 | Pt | 0 | 0 | 0.00000 |
| HETATM | 215 | Pt | 11.69186 | 17.65339 | 21.79718 | Pt | 0 | 0 | 0.00000 |
| HETATM | 216 | Pt | 11.69508 | 20.44308 | 21.79821 | Pt | 0 | 0 | 0.00000 |
| HETATM | 217 | Pt | 16.52926 | 26.02234 | 21.79586 | Pt | 0 | 0 | 0.00000 |
| HETATM | 218 | Pt | 16.52560 | 28.81469 | 21.80301 | Pt | 0 | 0 | 0.00000 |
| HETATM | 219 | Pt | 16.52614 | 31.60445 | 21.80099 | Pt | 0 | 0 | 0.00000 |
| HETATM | 220 | Pt | 16.53156 | 12.06511 | 21.78730 | Pt | 0 | 0 | 0.00000 |
| HETATM | 221 | Pt | 16.53240 | 14.85600 | 21.78106 | Pt | 0 | 0 | 0.00000 |
| HETATM | 222 | Pt | 16.52775 | 17.64682 | 21.78986 | Pt | 0 | 0 | 0.00000 |
| HETATM | 223 | Pt | 16.52872 | 20.43795 | 21.79342 | Pt | 0 | 0 | 0.00000 |
| HETATM | 224 | Pt | 16.52999 | 23.23001 | 21.79397 | Pt | 0 | 0 | 0.00000 |
| HETATM | 225 | Pt | 4.44051  | 19.04033 | 21.79071 | Pt | 0 | 0 | 0.00000 |
| HETATM | 226 | Pt | 4.44337  | 21.83090 | 21.78730 | Pt | 0 | 0 | 0.00000 |
| HETATM | 227 | Pt | 4.44709  | 24.62300 | 21.78439 | Pt | 0 | 0 | 0.00000 |
| HETATM | 228 | Pt | 4.44582  | 5.08574  | 21.78575 | Pt | 0 | 0 | 0.00000 |
| HETATM | 229 | Pt | 4.44196  | 7.87668  | 21.79006 | Pt | 0 | 0 | 0.00000 |
| HETATM | 230 | Pt | 4.44154  | 10.66716 | 21.78960 | Pt | 0 | 0 | 0.00000 |
| HETATM | 231 | Pt | 4.44138  | 13.45895 | 21.78709 | Pt | 0 | 0 | 0.00000 |
| HETATM | 232 | Pt | 4.44053  | 16.25009 | 21.78934 | Pt | 0 | 0 | 0.00000 |
| HETATM | 233 | Pt | 9.27925  | 21.83497 | 21.79258 | Pt | 0 | 0 | 0.00000 |
| HETATM | 234 | Pt | 9.28204  | 24.62745 | 21.78948 | Pt | 0 | 0 | 0.00000 |
| HETATM | 235 | Pt | 9.28030  | 27.41914 | 21.79428 | Pt | 0 | 0 | 0.00000 |
| HETATM | 236 | Pt | 9.27508  | 7.87783  | 21.80014 | Pt | 0 | 0 | 0.00000 |
| HETATM | 237 | Pt | 9.27633  | 10.66884 | 21.79769 | Pt | 0 | 0 | 0.00000 |
| HETATM | 238 | Pt | 9.27827  | 13.46360 | 21.79956 | Pt | 0 | 0 | 0.00000 |
| HETATM | 239 | Pt | 9.27635  | 16.25432 | 21.80041 | Pt | 0 | 0 | 0.00000 |
| HETATM | 240 | Pt | 9.27711  | 19.04409 | 21.79686 | Pt | 0 | 0 | 0.00000 |
| HETATM | 241 | Pt | 14.11367 | 24.62879 | 21.79165 | Pt | 0 | 0 | 0.00000 |
| HETATM | 242 | Pt | 14.11179 | 27.42139 | 21.79869 | Pt | 0 | 0 | 0.00000 |
| HETATM | 243 | Pt | 14.10763 | 30.21012 | 21.80210 | Pt | 0 | 0 | 0.00000 |
| HETATM | 244 | Pt | 14.11041 | 10.66868 | 21.78732 | Pt | 0 | 0 | 0.00000 |
| HETATM | 245 | Pt | 14.10977 | 13.46023 | 21.77730 | Pt | 0 | 0 | 0.00000 |
| HETATM | 246 | Pt | 14.10694 | 16.25445 | 21.78342 | Pt | 0 | 0 | 0.00000 |
| HETATM | 247 | Pt | 14.10887 | 19.04584 | 21.78978 | Pt | 0 | 0 | 0.00000 |
| HETATM | 248 | Pt | 14.11206 | 21.83685 | 21.79089 | Pt | 0 | 0 | 0.00000 |
| HETATM | 249 | Pt | 18.94315 | 27.41618 | 21.79149 | Pt | 0 | 0 | 0.00000 |
| HETATM | 250 | Pt | 18.94044 | 30.20756 | 21.79560 | Pt | 0 | 0 | 0.00000 |
| HETATM | 251 | Pt | 18.94501 | 32.99816 | 21.79008 | Pt | 0 | 0 | 0.00000 |
| HETATM | 252 | Pt | 18.95022 | 13.45953 | 21.78190 | Pt | 0 | 0 | 0.00000 |
| HETATM | 253 | Pt | 18.94897 | 16.25023 | 21.78281 | Pt | 0 | 0 | 0.00000 |
| HETATM | 254 | Pt | 18.94475 | 19.04029 | 21.78753 | Pt | 0 | 0 | 0.00000 |
| HETATM | 255 | Pt | 18.94502 | 21.83168 | 21.78807 | Pt | 0 | 0 | 0.00000 |
| HETATM | 256 | Pt | 18.94513 | 24.62392 | 21.78931 | Pt | 0 | 0 | 0.00000 |
| HETATM | 257 | Pt | 2.83906  | 19.04114 | 24.07882 | Pt | 0 | 0 | 0.00000 |
| HETATM | 258 | Pt | 2.84472  | 21.83114 | 24.07526 | Pt | 0 | 0 | 0.00000 |
| HETATM | 259 | Pt | 2.85179  | 2.29384  | 24.07172 | Pt | 0 | 0 | 0.00000 |
| HETATM | 260 | Pt | 2.85189  | 5.08726  | 24.07463 | Pt | 0 | 0 | 0.00000 |
| HETATM | 261 | Pt | 2.84477  | 7.87595  | 24.08297 | Pt | 0 | 0 | 0.00000 |
| HETATM | 262 | Pt | 2.84234  | 10.66179 | 24.08057 | Pt | 0 | 0 | 0.00000 |
| HETATM | 263 | Pt | 2.84198  | 13.45363 | 24.07405 | Pt | 0 | 0 | 0.00000 |
| HETATM | 264 | Pt | 2.83891  | 16.24978 | 24.07521 | Pt | 0 | 0 | 0.00000 |
| HETATM | 265 | Pt | 7.68126  | 21.83060 | 24.07921 | Pt | 0 | 0 | 0.00000 |
| HETATM | 266 | Pt | 7.68490  | 24.62527 | 24.07201 | Pt | 0 | 0 | 0.00000 |
| HETATM | 267 | Pt | 7.68545  | 5.09105  | 24.07834 | Pt | 0 | 0 | 0.00000 |
| HETATM | 268 | Pt | 7.67570  | 7.87785  | 24.08995 | Pt | 0 | 0 | 0.00000 |
| HETATM | 269 | Pt | 7.68007  | 10.66921 | 24.08903 | Pt | 0 | 0 | 0.00000 |
| HETATM | 270 | Pt | 7.68832  | 13.45859 | 24.09608 | Pt | 0 | 0 | 0.00000 |
| HETATM | 271 | Pt | 7.68008  | 16.24220 | 24.09410 | Pt | 0 | 0 | 0.00000 |
| HETATM | 272 | Pt | 7.67743  | 19.03930 | 24.08213 | Pt | 0 | 0 | 0.00000 |
| HETATM | 273 | Pt | 12.51661 | 24.63373 | 24.07994 | Pt | 0 | 0 | 0.00000 |
| HETATM | 274 | Pt | 12.51597 | 27.42812 | 24.08985 | Pt | 0 | 0 | 0.00000 |

|        |     |    |          |          |          |    |   |   |         |
|--------|-----|----|----------|----------|----------|----|---|---|---------|
| HETATM | 275 | Pt | 12.50463 | 7.88429  | 24.09276 | Pt | 0 | 0 | 0.00000 |
| HETATM | 276 | Pt | 12.50673 | 10.67107 | 24.06065 | Pt | 0 | 0 | 0.00000 |
| HETATM | 277 | Pt | 12.50425 | 13.46584 | 24.05341 | Pt | 0 | 0 | 0.00000 |
| HETATM | 278 | Pt | 12.50227 | 16.26434 | 24.07420 | Pt | 0 | 0 | 0.00000 |
| HETATM | 279 | Pt | 12.51071 | 19.05073 | 24.08340 | Pt | 0 | 0 | 0.00000 |
| HETATM | 280 | Pt | 12.51400 | 21.84113 | 24.08066 | Pt | 0 | 0 | 0.00000 |
| HETATM | 281 | Pt | 17.34322 | 27.41987 | 24.08044 | Pt | 0 | 0 | 0.00000 |
| HETATM | 282 | Pt | 17.33767 | 30.21302 | 24.09185 | Pt | 0 | 0 | 0.00000 |
| HETATM | 283 | Pt | 17.34484 | 10.67324 | 24.07979 | Pt | 0 | 0 | 0.00000 |
| HETATM | 284 | Pt | 17.35434 | 13.46452 | 24.06248 | Pt | 0 | 0 | 0.00000 |
| HETATM | 285 | Pt | 17.35317 | 16.25423 | 24.06291 | Pt | 0 | 0 | 0.00000 |
| HETATM | 286 | Pt | 17.34506 | 19.04253 | 24.07473 | Pt | 0 | 0 | 0.00000 |
| HETATM | 287 | Pt | 17.34494 | 21.83464 | 24.07563 | Pt | 0 | 0 | 0.00000 |
| HETATM | 288 | Pt | 17.34547 | 24.62731 | 24.07640 | Pt | 0 | 0 | 0.00000 |
| HETATM | 289 | Pt | 5.24820  | 20.43558 | 24.06741 | Pt | 0 | 0 | 0.00000 |
| HETATM | 290 | Pt | 5.25284  | 23.22497 | 24.06087 | Pt | 0 | 0 | 0.00000 |
| HETATM | 291 | Pt | 5.25517  | 3.68867  | 24.05839 | Pt | 0 | 0 | 0.00000 |
| HETATM | 292 | Pt | 5.25054  | 6.48110  | 24.06568 | Pt | 0 | 0 | 0.00000 |
| HETATM | 293 | Pt | 5.24431  | 9.26887  | 24.07080 | Pt | 0 | 0 | 0.00000 |
| HETATM | 294 | Pt | 5.24740  | 12.06161 | 24.06172 | Pt | 0 | 0 | 0.00000 |
| HETATM | 295 | Pt | 5.24737  | 14.85434 | 24.06385 | Pt | 0 | 0 | 0.00000 |
| HETATM | 296 | Pt | 5.24664  | 17.64543 | 24.06932 | Pt | 0 | 0 | 0.00000 |
| HETATM | 297 | Pt | 10.08767 | 23.23040 | 24.06961 | Pt | 0 | 0 | 0.00000 |
| HETATM | 298 | Pt | 10.09121 | 26.02407 | 24.06945 | Pt | 0 | 0 | 0.00000 |
| HETATM | 299 | Pt | 10.08362 | 6.48588  | 24.08595 | Pt | 0 | 0 | 0.00000 |
| HETATM | 300 | Pt | 10.07924 | 9.27136  | 24.08193 | Pt | 0 | 0 | 0.00000 |
| HETATM | 301 | Pt | 10.08575 | 12.06615 | 24.07372 | Pt | 0 | 0 | 0.00000 |
| HETATM | 302 | Pt | 10.08276 | 14.86632 | 24.08940 | Pt | 0 | 0 | 0.00000 |
| HETATM | 303 | Pt | 10.08552 | 17.64876 | 24.08651 | Pt | 0 | 0 | 0.00000 |
| HETATM | 304 | Pt | 10.08501 | 20.43799 | 24.07790 | Pt | 0 | 0 | 0.00000 |
| HETATM | 305 | Pt | 14.91967 | 26.02743 | 24.07278 | Pt | 0 | 0 | 0.00000 |
| HETATM | 306 | Pt | 14.91569 | 28.82293 | 24.08917 | Pt | 0 | 0 | 0.00000 |
| HETATM | 307 | Pt | 14.91636 | 9.28010  | 24.08300 | Pt | 0 | 0 | 0.00000 |
| HETATM | 308 | Pt | 14.92509 | 12.06947 | 24.05302 | Pt | 0 | 0 | 0.00000 |
| HETATM | 309 | Pt | 14.92644 | 14.85920 | 24.03910 | Pt | 0 | 0 | 0.00000 |
| HETATM | 310 | Pt | 14.91463 | 17.65057 | 24.06220 | Pt | 0 | 0 | 0.00000 |
| HETATM | 311 | Pt | 14.91767 | 20.44154 | 24.06896 | Pt | 0 | 0 | 0.00000 |
| HETATM | 312 | Pt | 14.91896 | 23.23395 | 24.06964 | Pt | 0 | 0 | 0.00000 |
| HETATM | 313 | Pt | 0.40966  | 17.64790 | 24.07168 | Pt | 0 | 0 | 0.00000 |
| HETATM | 314 | Pt | 0.40967  | 20.43886 | 24.07277 | Pt | 0 | 0 | 0.00000 |
| HETATM | 315 | Pt | 0.42092  | 0.90049  | 24.06094 | Pt | 0 | 0 | 0.00000 |
| HETATM | 316 | Pt | 0.42441  | 3.69070  | 24.05667 | Pt | 0 | 0 | 0.00000 |
| HETATM | 317 | Pt | 0.41648  | 6.48170  | 24.06347 | Pt | 0 | 0 | 0.00000 |
| HETATM | 318 | Pt | 0.41173  | 9.27097  | 24.06541 | Pt | 0 | 0 | 0.00000 |
| HETATM | 319 | Pt | 0.41258  | 12.06211 | 24.06579 | Pt | 0 | 0 | 0.00000 |
| HETATM | 320 | Pt | 0.41272  | 14.85566 | 24.06774 | Pt | 0 | 0 | 0.00000 |
| HETATM | 321 | Pt | 3.63671  | 20.43435 | 26.39519 | Pt | 0 | 0 | 0.00000 |
| HETATM | 322 | Pt | 3.64289  | 23.22514 | 26.39003 | Pt | 0 | 0 | 0.00000 |
| HETATM | 323 | Pt | 3.64718  | 3.69234  | 26.38838 | Pt | 0 | 0 | 0.00000 |
| HETATM | 324 | Pt | 3.65393  | 6.49211  | 26.40375 | Pt | 0 | 0 | 0.00000 |
| HETATM | 325 | Pt | 3.63748  | 9.26889  | 26.42218 | Pt | 0 | 0 | 0.00000 |
| HETATM | 326 | Pt | 3.64011  | 12.04403 | 26.39250 | Pt | 0 | 0 | 0.00000 |
| HETATM | 327 | Pt | 3.63045  | 14.84902 | 26.37815 | Pt | 0 | 0 | 0.00000 |
| HETATM | 328 | Pt | 3.63067  | 17.64479 | 26.39259 | Pt | 0 | 0 | 0.00000 |
| HETATM | 329 | Pt | 8.47431  | 23.22566 | 26.39244 | Pt | 0 | 0 | 0.00000 |
| HETATM | 330 | Pt | 8.48277  | 26.02355 | 26.38296 | Pt | 0 | 0 | 0.00000 |
| HETATM | 331 | Pt | 8.48292  | 6.49637  | 26.42249 | Pt | 0 | 0 | 0.00000 |
| HETATM | 332 | Pt | 8.46286  | 9.26591  | 26.41581 | Pt | 0 | 0 | 0.00000 |
| HETATM | 333 | Pt | 8.49775  | 12.04380 | 26.42445 | Pt | 0 | 0 | 0.00000 |
| HETATM | 334 | Pt | 8.48951  | 14.83191 | 26.46601 | Pt | 0 | 0 | 0.00000 |
| HETATM | 335 | Pt | 8.46840  | 17.64001 | 26.39474 | Pt | 0 | 0 | 0.00000 |
| HETATM | 336 | Pt | 8.47569  | 20.42761 | 26.40553 | Pt | 0 | 0 | 0.00000 |
| HETATM | 337 | Pt | 13.30918 | 26.04450 | 26.39623 | Pt | 0 | 0 | 0.00000 |

|        |     |    |          |          |          |    |   |   |         |
|--------|-----|----|----------|----------|----------|----|---|---|---------|
| HETATM | 338 | Pt | 13.30759 | 28.85307 | 26.42290 | Pt | 0 | 0 | 0.00000 |
| HETATM | 339 | Pt | 13.29585 | 9.30165  | 26.38798 | Pt | 0 | 0 | 0.00000 |
| HETATM | 340 | Pt | 13.31592 | 12.07188 | 26.32503 | Pt | 0 | 0 | 0.00000 |
| HETATM | 341 | Pt | 13.33343 | 14.86784 | 26.30975 | Pt | 0 | 0 | 0.00000 |
| HETATM | 342 | Pt | 13.31208 | 17.65200 | 26.39618 | Pt | 0 | 0 | 0.00000 |
| HETATM | 343 | Pt | 13.30893 | 20.44667 | 26.39652 | Pt | 0 | 0 | 0.00000 |
| HETATM | 344 | Pt | 13.30698 | 23.24461 | 26.39665 | Pt | 0 | 0 | 0.00000 |
| HETATM | 345 | Pt | 18.13355 | 28.82235 | 26.39347 | Pt | 0 | 0 | 0.00000 |
| HETATM | 346 | Pt | 18.13109 | 31.61360 | 26.40402 | Pt | 0 | 0 | 0.00000 |
| HETATM | 347 | Pt | 18.15265 | 12.07240 | 26.37387 | Pt | 0 | 0 | 0.00000 |
| HETATM | 348 | Pt | 18.15925 | 14.86460 | 26.37059 | Pt | 0 | 0 | 0.00000 |
| HETATM | 349 | Pt | 18.14485 | 17.65352 | 26.39063 | Pt | 0 | 0 | 0.00000 |
| HETATM | 350 | Pt | 18.13865 | 20.44260 | 26.39147 | Pt | 0 | 0 | 0.00000 |
| HETATM | 351 | Pt | 18.13706 | 23.23435 | 26.38951 | Pt | 0 | 0 | 0.00000 |
| HETATM | 352 | Pt | 18.13754 | 26.02703 | 26.39004 | Pt | 0 | 0 | 0.00000 |
| HETATM | 353 | Pt | 6.08054  | 21.83333 | 26.31390 | Pt | 0 | 0 | 0.00000 |
| HETATM | 354 | Pt | 6.08211  | 24.61877 | 26.30057 | Pt | 0 | 0 | 0.00000 |
| HETATM | 355 | Pt | 6.08710  | 5.08098  | 26.29992 | Pt | 0 | 0 | 0.00000 |
| HETATM | 356 | Pt | 6.07195  | 7.87253  | 26.32363 | Pt | 0 | 0 | 0.00000 |
| HETATM | 357 | Pt | 6.06655  | 10.65749 | 26.30471 | Pt | 0 | 0 | 0.00000 |
| HETATM | 358 | Pt | 6.07783  | 13.45294 | 26.29803 | Pt | 0 | 0 | 0.00000 |
| HETATM | 359 | Pt | 6.07359  | 16.25622 | 26.31543 | Pt | 0 | 0 | 0.00000 |
| HETATM | 360 | Pt | 6.07412  | 19.04710 | 26.31834 | Pt | 0 | 0 | 0.00000 |
| HETATM | 361 | Pt | 10.91620 | 24.62195 | 26.31757 | Pt | 0 | 0 | 0.00000 |
| HETATM | 362 | Pt | 10.91840 | 27.41661 | 26.32738 | Pt | 0 | 0 | 0.00000 |
| HETATM | 363 | Pt | 10.90329 | 7.88342  | 26.35493 | Pt | 0 | 0 | 0.00000 |
| HETATM | 364 | Pt | 10.91113 | 10.66165 | 26.32024 | Pt | 0 | 0 | 0.00000 |
| HETATM | 365 | Pt | 10.89406 | 13.47280 | 26.32241 | Pt | 0 | 0 | 0.00000 |
| HETATM | 366 | Pt | 10.91319 | 16.25048 | 26.37603 | Pt | 0 | 0 | 0.00000 |
| HETATM | 367 | Pt | 10.91654 | 19.03968 | 26.33931 | Pt | 0 | 0 | 0.00000 |
| HETATM | 368 | Pt | 10.91644 | 21.83192 | 26.32407 | Pt | 0 | 0 | 0.00000 |
| HETATM | 369 | Pt | 15.74366 | 27.42346 | 26.32804 | Pt | 0 | 0 | 0.00000 |
| HETATM | 370 | Pt | 15.73794 | 30.22156 | 26.36273 | Pt | 0 | 0 | 0.00000 |
| HETATM | 371 | Pt | 15.74123 | 10.68305 | 26.33584 | Pt | 0 | 0 | 0.00000 |
| HETATM | 372 | Pt | 15.75647 | 13.47256 | 26.30129 | Pt | 0 | 0 | 0.00000 |
| HETATM | 373 | Pt | 15.75840 | 16.26021 | 26.29276 | Pt | 0 | 0 | 0.00000 |
| HETATM | 374 | Pt | 15.74914 | 19.04475 | 26.31772 | Pt | 0 | 0 | 0.00000 |
| HETATM | 375 | Pt | 15.74564 | 21.83753 | 26.31953 | Pt | 0 | 0 | 0.00000 |
| HETATM | 376 | Pt | 15.74504 | 24.62975 | 26.32004 | Pt | 0 | 0 | 0.00000 |
| HETATM | 377 | Pt | 1.23776  | 19.04469 | 26.32301 | Pt | 0 | 0 | 0.00000 |
| HETATM | 378 | Pt | 1.24601  | 21.83639 | 26.31571 | Pt | 0 | 0 | 0.00000 |
| HETATM | 379 | Pt | 1.25617  | 2.29845  | 26.30921 | Pt | 0 | 0 | 0.00000 |
| HETATM | 380 | Pt | 1.25526  | 5.08819  | 26.30412 | Pt | 0 | 0 | 0.00000 |
| HETATM | 381 | Pt | 1.24383  | 7.87904  | 26.31424 | Pt | 0 | 0 | 0.00000 |
| HETATM | 382 | Pt | 1.23853  | 10.66438 | 26.31491 | Pt | 0 | 0 | 0.00000 |
| HETATM | 383 | Pt | 1.24111  | 13.45849 | 26.31244 | Pt | 0 | 0 | 0.00000 |
| HETATM | 384 | Pt | 1.23909  | 16.25171 | 26.32135 | Pt | 0 | 0 | 0.00000 |
| HETATM | 385 | Pt | 2.08932  | 17.62703 | 28.96775 | Pt | 0 | 0 | 0.00000 |
| HETATM | 386 | Pt | 2.10960  | 20.42223 | 28.95603 | Pt | 0 | 0 | 0.00000 |
| HETATM | 387 | Pt | 2.11599  | 23.21655 | 28.95631 | Pt | 0 | 0 | 0.00000 |
| HETATM | 388 | Pt | 2.12197  | 3.69150  | 28.96572 | Pt | 0 | 0 | 0.00000 |
| HETATM | 389 | Pt | 2.15969  | 6.48707  | 28.89865 | Pt | 0 | 0 | 0.00000 |
| HETATM | 390 | Pt | 2.11584  | 9.25530  | 28.99011 | Pt | 0 | 0 | 0.00000 |
| HETATM | 391 | Pt | 2.11708  | 12.02433 | 28.90580 | Pt | 0 | 0 | 0.00000 |
| HETATM | 392 | Pt | 2.07174  | 14.82432 | 28.96629 | Pt | 0 | 0 | 0.00000 |
| HETATM | 393 | Pt | 6.94960  | 20.37260 | 28.95842 | Pt | 0 | 0 | 0.00000 |
| HETATM | 394 | Pt | 6.93954  | 23.22205 | 28.96730 | Pt | 0 | 0 | 0.00000 |
| HETATM | 395 | Pt | 6.92974  | 26.07399 | 28.87642 | Pt | 0 | 0 | 0.00000 |
| HETATM | 396 | Pt | 6.95740  | 6.56590  | 28.91812 | Pt | 0 | 0 | 0.00000 |
| HETATM | 397 | Pt | 6.99267  | 9.25925  | 29.98085 | Pt | 0 | 0 | 0.00000 |
| HETATM | 398 | Pt | 6.97093  | 11.91341 | 28.83612 | Pt | 0 | 0 | 0.00000 |
| HETATM | 399 | Pt | 6.86371  | 14.68230 | 28.83900 | Pt | 0 | 0 | 0.00000 |
| HETATM | 400 | Pt | 6.88061  | 17.51446 | 28.99562 | Pt | 0 | 0 | 0.00000 |

|        |     |    |          |          |          |    |   |   |         |
|--------|-----|----|----------|----------|----------|----|---|---|---------|
| HETATM | 401 | Pt | 11.76562 | 23.34209 | 28.96902 | Pt | 0 | 0 | 0.00000 |
| HETATM | 402 | Pt | 11.75432 | 26.18706 | 28.92886 | Pt | 0 | 0 | 0.00000 |
| HETATM | 403 | Pt | 11.75492 | 29.01921 | 28.94517 | Pt | 0 | 0 | 0.00000 |
| HETATM | 404 | Pt | 11.77255 | 9.44858  | 29.91819 | Pt | 0 | 0 | 0.00000 |
| HETATM | 405 | Pt | 11.70029 | 12.00709 | 28.63860 | Pt | 0 | 0 | 0.00000 |
| HETATM | 406 | Pt | 11.83939 | 14.84059 | 28.79117 | Pt | 0 | 0 | 0.00000 |
| HETATM | 407 | Pt | 11.81671 | 17.69789 | 28.96814 | Pt | 0 | 0 | 0.00000 |
| HETATM | 408 | Pt | 11.76681 | 20.51339 | 28.95892 | Pt | 0 | 0 | 0.00000 |
| HETATM | 409 | Pt | 16.59163 | 26.04620 | 28.94575 | Pt | 0 | 0 | 0.00000 |
| HETATM | 410 | Pt | 16.57127 | 28.83911 | 28.94595 | Pt | 0 | 0 | 0.00000 |
| HETATM | 411 | Pt | 16.61459 | 31.62480 | 29.06877 | Pt | 0 | 0 | 0.00000 |
| HETATM | 412 | Pt | 16.60387 | 12.08372 | 28.85737 | Pt | 0 | 0 | 0.00000 |
| HETATM | 413 | Pt | 16.62700 | 14.85009 | 28.86185 | Pt | 0 | 0 | 0.00000 |
| HETATM | 414 | Pt | 16.62542 | 17.65393 | 28.99759 | Pt | 0 | 0 | 0.00000 |
| HETATM | 415 | Pt | 16.61145 | 20.45463 | 28.95795 | Pt | 0 | 0 | 0.00000 |
| HETATM | 416 | Pt | 16.59246 | 23.24771 | 28.96042 | Pt | 0 | 0 | 0.00000 |
| HETATM | 417 | Pt | 4.47296  | 19.02444 | 28.66704 | Pt | 0 | 0 | 0.00000 |
| HETATM | 418 | Pt | 4.48733  | 21.82191 | 28.66100 | Pt | 0 | 0 | 0.00000 |
| HETATM | 419 | Pt | 4.48525  | 24.61907 | 28.65377 | Pt | 0 | 0 | 0.00000 |
| HETATM | 420 | Pt | 4.50353  | 5.08658  | 28.64719 | Pt | 0 | 0 | 0.00000 |
| HETATM | 421 | Pt | 4.55474  | 7.92983  | 28.72453 | Pt | 0 | 0 | 0.00000 |
| HETATM | 422 | Pt | 4.54023  | 10.63168 | 28.71967 | Pt | 0 | 0 | 0.00000 |
| HETATM | 423 | Pt | 4.44333  | 13.44541 | 28.62634 | Pt | 0 | 0 | 0.00000 |
| HETATM | 424 | Pt | 4.44559  | 16.22734 | 28.65046 | Pt | 0 | 0 | 0.00000 |
| HETATM | 425 | Pt | 9.30624  | 21.82434 | 28.66308 | Pt | 0 | 0 | 0.00000 |
| HETATM | 426 | Pt | 9.29893  | 24.62512 | 28.65765 | Pt | 0 | 0 | 0.00000 |
| HETATM | 427 | Pt | 9.31263  | 27.42375 | 28.66093 | Pt | 0 | 0 | 0.00000 |
| HETATM | 428 | Pt | 9.31850  | 7.93962  | 28.79517 | Pt | 0 | 0 | 0.00000 |
| HETATM | 429 | Pt | 9.36005  | 10.52023 | 28.74534 | Pt | 0 | 0 | 0.00000 |
| HETATM | 430 | Pt | 9.42034  | 13.47018 | 29.07508 | Pt | 0 | 0 | 0.00000 |
| HETATM | 431 | Pt | 9.29972  | 16.20282 | 28.80916 | Pt | 0 | 0 | 0.00000 |
| HETATM | 432 | Pt | 9.30049  | 18.99751 | 28.69366 | Pt | 0 | 0 | 0.00000 |
| HETATM | 433 | Pt | 14.12476 | 24.67999 | 28.66347 | Pt | 0 | 0 | 0.00000 |
| HETATM | 434 | Pt | 14.12352 | 27.49283 | 28.66569 | Pt | 0 | 0 | 0.00000 |
| HETATM | 435 | Pt | 14.08762 | 30.38818 | 28.75023 | Pt | 0 | 0 | 0.00000 |
| HETATM | 436 | Pt | 14.08265 | 10.72071 | 28.70429 | Pt | 0 | 0 | 0.00000 |
| HETATM | 437 | Pt | 14.18403 | 13.45341 | 28.53022 | Pt | 0 | 0 | 0.00000 |
| HETATM | 438 | Pt | 14.17422 | 16.24039 | 28.65243 | Pt | 0 | 0 | 0.00000 |
| HETATM | 439 | Pt | 14.15797 | 19.05986 | 28.66144 | Pt | 0 | 0 | 0.00000 |
| HETATM | 440 | Pt | 14.13402 | 21.86664 | 28.66169 | Pt | 0 | 0 | 0.00000 |
| HETATM | 441 | Pt | 18.95948 | 27.43967 | 28.65480 | Pt | 0 | 0 | 0.00000 |
| HETATM | 442 | Pt | 18.96785 | 30.22592 | 28.66775 | Pt | 0 | 0 | 0.00000 |
| HETATM | 443 | Pt | 18.98394 | 33.00575 | 28.65854 | Pt | 0 | 0 | 0.00000 |
| HETATM | 444 | Pt | 19.00284 | 13.46889 | 28.63408 | Pt | 0 | 0 | 0.00000 |
| HETATM | 445 | Pt | 19.00310 | 16.27279 | 28.64866 | Pt | 0 | 0 | 0.00000 |
| HETATM | 446 | Pt | 18.99240 | 19.05626 | 28.65905 | Pt | 0 | 0 | 0.00000 |
| HETATM | 447 | Pt | 18.97795 | 21.84980 | 28.65668 | Pt | 0 | 0 | 0.00000 |
| HETATM | 448 | Pt | 18.96630 | 24.63682 | 28.65750 | Pt | 0 | 0 | 0.00000 |
| HETATM | 449 | O  | 3.07835  | 19.03945 | 29.96746 | O  | 0 | 0 | 0.00000 |
| HETATM | 450 | O  | 3.08907  | 21.82947 | 29.96202 | O  | 0 | 0 | 0.00000 |
| HETATM | 451 | O  | 3.10326  | 2.29506  | 29.96113 | O  | 0 | 0 | 0.00000 |
| HETATM | 452 | O  | 3.11247  | 5.11183  | 29.94392 | O  | 0 | 0 | 0.00000 |
| HETATM | 453 | O  | 3.08343  | 7.84497  | 29.97551 | O  | 0 | 0 | 0.00000 |
| HETATM | 454 | O  | 3.06423  | 10.69968 | 29.97769 | O  | 0 | 0 | 0.00000 |
| HETATM | 455 | O  | 3.07250  | 13.43366 | 29.93854 | O  | 0 | 0 | 0.00000 |
| HETATM | 456 | O  | 3.06915  | 16.23777 | 29.96350 | O  | 0 | 0 | 0.00000 |
| HETATM | 457 | O  | 7.92855  | 21.81768 | 29.96439 | O  | 0 | 0 | 0.00000 |
| HETATM | 458 | O  | 7.90667  | 24.64509 | 29.93917 | O  | 0 | 0 | 0.00000 |
| HETATM | 459 | O  | 7.84827  | 5.07760  | 29.92035 | O  | 0 | 0 | 0.00000 |
| HETATM | 460 | O  | 8.07065  | 7.58183  | 30.17631 | O  | 0 | 0 | 0.00000 |
| HETATM | 461 | O  | 8.11689  | 10.94852 | 30.10696 | O  | 0 | 0 | 0.00000 |
| HETATM | 462 | O  | 7.51468  | 13.36456 | 30.01051 | O  | 0 | 0 | 0.00000 |
| HETATM | 463 | O  | 7.70016  | 16.18664 | 30.01171 | O  | 0 | 0 | 0.00000 |

|                     |     |   |               |          |          |   |   |   |         |
|---------------------|-----|---|---------------|----------|----------|---|---|---|---------|
| HETATM              | 464 | O | 7.90881       | 19.03661 | 29.98335 | O | 0 | 0 | 0.00000 |
| HETATM              | 465 | O | 12.73974      | 24.68001 | 29.95516 | O | 0 | 0 | 0.00000 |
| HETATM              | 466 | O | 12.68350      | 27.48779 | 29.93914 | O | 0 | 0 | 0.00000 |
| HETATM              | 467 | O | 12.85641      | 7.74655  | 30.15288 | O | 0 | 0 | 0.00000 |
| HETATM              | 468 | O | 12.75988      | 11.20841 | 30.00133 | O | 0 | 0 | 0.00000 |
| HETATM              | 469 | O | 10.20967      | 14.89213 | 30.01817 | O | 0 | 0 | 0.00000 |
| HETATM              | 470 | O | 12.80225      | 16.13615 | 29.90323 | O | 0 | 0 | 0.00000 |
| HETATM              | 471 | O | 12.76691      | 19.03961 | 29.96081 | O | 0 | 0 | 0.00000 |
| HETATM              | 472 | O | 12.74616      | 21.85230 | 29.96156 | O | 0 | 0 | 0.00000 |
| HETATM              | 473 | O | 17.55642      | 27.44359 | 29.95066 | O | 0 | 0 | 0.00000 |
| HETATM              | 474 | O | 17.59551      | 30.20100 | 29.99269 | O | 0 | 0 | 0.00000 |
| HETATM              | 475 | O | 17.59996      | 10.75270 | 29.96617 | O | 0 | 0 | 0.00000 |
| HETATM              | 476 | O | 17.54252      | 13.47394 | 29.89920 | O | 0 | 0 | 0.00000 |
| HETATM              | 477 | O | 17.61260      | 16.22824 | 29.94447 | O | 0 | 0 | 0.00000 |
| HETATM              | 478 | O | 17.61028      | 19.06775 | 29.97393 | O | 0 | 0 | 0.00000 |
| HETATM              | 479 | O | 17.58008      | 21.84919 | 29.96215 | O | 0 | 0 | 0.00000 |
| HETATM              | 480 | O | 17.57397      | 24.64743 | 29.95894 | O | 0 | 0 | 0.00000 |
| UNIT ENERGY    kcal |     |   |               |          |          |   |   |   |         |
| ENERGY              |     |   | -60144.226108 |          |          |   |   |   |         |
| END                 |     |   |               |          |          |   |   |   |         |
