# Supplementary material for: Development of a ReaxFF potential for Pt–O systems describing the energetics and dynamics of Pt-oxide formation
Source: Royal Society of Chemistry journal article supplement (doi:10.1039/c4cp03111c), 2014-01-01
Supplement: c4cp03111c1.zip [file c4cp03111c1.zip]

```

XTLGRF 200
DESCRP bulk-Pt
REMARK EOS_fcc
CRYSTX      3.94732      3.94732      3.94732      90.00000      90.00000      90.00000
FORMAT ATOM  (a6,1x,i5,1x,a5,1x,a3,1x,a1,1x,a5,3f10.5,1x,a5,i3,i2,1x,f8.5)
HETATM      1 Pt              0.09999      0.09999      0.09999      Pt  1 0  0.00000
HETATM      2 Pt              0.09999      2.07365      2.07365      Pt  1 0  0.00000
HETATM      3 Pt              2.07365      0.09999      2.07365      Pt  1 0  0.00000
HETATM      4 Pt              2.07365      2.07365      0.09999      Pt  1 0  0.00000
UNIT ENERGY kcal
ENERGY      -532.394091
END

```

```

XTLGRF 200
DESCRP bulk-Pt
REMARK EOS_bcc
CRYSTX      3.12820      3.12820      3.12820      90.00000      90.00000      90.00000
FORMAT ATOM  (a6,1x,i5,1x,a5,1x,a3,1x,a1,1x,a5,3f10.5,1x,a5,i3,i2,1x,f8.5)
HETATM      1 Pt              0.10004      0.10004      0.10004      Pt  1 0  0.00000
HETATM      2 Pt              1.66414      1.66414      1.66414      Pt  1 0  0.00000
UNIT ENERGY kcal
ENERGY      -260.676128
END

```

```

XTLGRF 200
DESCRP bulk-Pt
REMARK EOS_sc
CRYSTX      2.74543      2.74543      2.74543      90.00000      90.00000      90.00000
FORMAT ATOM  (a6,1x,i5,1x,a5,1x,a3,1x,a1,1x,a5,3f10.5,1x,a5,i3,i2,1x,f8.5)
HETATM      1 Pt              0.10000      0.10000      0.10000      Pt  1 0  0.00000
UNIT ENERGY kcal
ENERGY      -104.527350
END

```

```

XTLGRF 200
DESCRP bulk-Pt
REMARK EOS_a15
CRYSTX      4.99545      4.99545      4.99545      90.00000      90.00000      90.00000
FORMAT ATOM  (a6,1x,i5,1x,a5,1x,a3,1x,a1,1x,a5,3f10.5,1x,a5,i3,i2,1x,f8.5)
HETATM      1 Pt              -0.00000     -0.00000     -0.00000      Pt  1 0  0.00000
HETATM      2 Pt              2.49772      2.49772      2.49772      Pt  1 0  0.00000
HETATM      3 Pt              1.24886      2.49772     -0.00000      Pt  1 0  0.00000
HETATM      4 Pt              3.74658      2.49772     -0.00000      Pt  1 0  0.00000
HETATM      5 Pt              -0.00000      1.24886      2.49772      Pt  1 0  0.00000
HETATM      6 Pt              -0.00000      3.74658      2.49772      Pt  1 0  0.00000
HETATM      7 Pt              2.49772     -0.00000      1.24886      Pt  1 0  0.00000
HETATM      8 Pt              2.49772     -0.00000      3.74658      Pt  1 0  0.00000
UNIT ENERGY kcal
ENERGY      -1016.434534
END

```

```

XTLGRF 200
DESCRP bulk-Pt
REMARK EOS_hcp
CRYSTX      2.79869      2.79869      4.53387      90.00000      90.00000      120.00000
FORMAT ATOM  (a6,1x,i5,1x,a5,1x,a3,1x,a1,1x,a5,3f10.5,1x,a5,i3,i2,1x,f8.5)
HETATM      1 Pt              0.80791      1.39934      1.13347      Pt  1 0  0.00000
HETATM      2 Pt              1.61582      2.79869      3.40040      Pt  1 0  0.00000
UNIT ENERGY kcal
ENERGY      -266.153082
END

```

```

XTLGRF 200
DESCRP bulk-Pt
REMARK EOS_dia
CRYSTX      6.56384      6.56384      6.56384      90.00000      90.00000      90.00000
FORMAT ATOM  (a6,1x,i5,1x,a5,1x,a3,1x,a1,1x,a5,3f10.5,1x,a5,i3,i2,1x,f8.5)
HETATM      1 Pt              0.00000      0.00000     -0.00000      Pt  1 0  0.00000
HETATM      2 Pt              0.00000      3.28192      3.28192      Pt  1 0  0.00000
HETATM      3 Pt              3.28192     -0.00000      3.28192      Pt  1 0  0.00000
HETATM      4 Pt              3.28192      3.28192     -0.00000      Pt  1 0  0.00000
HETATM      5 Pt              1.64096      1.64096      1.64096      Pt  1 0  0.00000
HETATM      6 Pt              1.64096      4.92288      4.92288      Pt  1 0  0.00000
HETATM      7 Pt              4.92288      1.64096      4.92288      Pt  1 0  0.00000
HETATM      8 Pt              4.92288      4.92288      1.64096      Pt  1 0  0.00000
UNIT ENERGY kcal
ENERGY              -733.584616
END

```
