# Supplementary material for: Development of a ReaxFF potential for Pt–O systems describing the energetics and dynamics of Pt-oxide formation
Source: Royal Society of Chemistry journal article supplement (doi:10.1039/c4cp03111c), 2014-01-01
Supplement: c4cp03111c1.zip [file c4cp03111c1.zip]

113

```

IS, "top"-diffusion ENERGY(Rydberg)= -5934.96837422
Pt      0.0000000000      0.0000000000 -13.7190560799
Pt     -1.4001952976      2.4252093963 -13.7190560799
Pt      2.8003905958      0.0000000000 -13.7190560799
Pt      1.4001952976      2.4252093963 -13.7190560799
Pt      0.0000000000      1.6168062642 -11.4325467335
Pt     -1.4001952976      4.0420156606 -11.4325467335
Pt      2.8003905958      1.6168062642 -11.4325467335
Pt      1.4001952976      4.0420156606 -11.4325467335
Pt      1.4017340238      0.8091112085  -9.1593030933
Pt      0.0001065281      3.2341769252  -9.1553523997
Pt      4.2005308328      0.8074350515  -9.1568451938
Pt      2.7999128139      3.2338022171  -9.1566834725
Pt     -0.0002230416      0.0002351442  -6.8924177933
Pt     -1.3979190250      2.4241321726  -6.8782290012
Pt      2.7980790584     -0.0010501032  -6.8772689710
Pt      1.3983125239      2.4238937459  -6.8778475161
Pt     -0.0003122336      1.6165933525  -4.5971299506
Pt     -1.3989047084      4.0410357107  -4.6042410656
Pt      2.8023389187      1.6190813761  -4.6069360089
Pt      1.3968682075      4.0414562929  -4.6048613163
Pt      1.3952369154      0.8083761412  -2.3290493049
Pt     -0.0021127076      3.2562972768  -2.2965833912
Pt      4.1957833644      0.8086509225  -2.3346394752
Pt      2.7955106239      3.2337894830  -2.3346222217
Pt     -0.0030721838      0.0023615734   0.0076636827
Pt     -1.4172175600      2.3988820077  -0.0079061713
Pt      2.7809189576      0.0289960184  -0.0055796867
Pt      1.4129808021      2.3986920338  -0.0060517950
Pt     -2.8004007099      4.8504363116 -13.7190560799
Pt      5.6008014199      0.0000000000 -13.7190560799
Pt      2.8004007099      4.8504363116 -13.7190560799
Pt     -4.2005960076      7.2756457079 -13.7190560799
Pt      4.2006061223      2.4252093963 -13.7190560799
Pt      1.4002054123      7.2756457079 -13.7190560799
Pt     -0.0000101142      4.8504363116 -13.7190560799
Pt      8.4011920156      0.0000000000 -13.7190560799
Pt      5.6007913057      4.8504363116 -13.7190560799
Pt     -1.4002054123      7.2756457079 -13.7190560799
Pt      7.0009967175      2.4252093963 -13.7190560799
Pt      4.2005960076      7.2756457079 -13.7190560799
Pt     -2.8004007099      6.4672425758 -11.4325467335
Pt      5.6008014199      1.6168062642 -11.4325467335
Pt      2.8004007099      6.4672425758 -11.4325467335
Pt     -4.2005960076      8.8924519722 -11.4325467335
Pt      4.2006061223      4.0420156606 -11.4325467335
Pt      1.4002054123      8.8924519722 -11.4325467335
Pt     -0.0000101142      6.4672425758 -11.4325467335
Pt      8.4011920156      1.6168062642 -11.4325467335
Pt      5.6007913057      6.4672425758 -11.4325467335
Pt     -1.4002054123      8.8924519722 -11.4325467335
Pt      7.0009967175      4.0420156606 -11.4325467335
Pt      4.2005960076      8.8924519722 -11.4325467335
Pt     -1.3996272474      5.6593197828  -9.1563552341
Pt      7.0012843879      0.8075291258  -9.1568506254
Pt      4.2002175092      5.6592758432  -9.1567281517
Pt     -2.7999165619      8.0838215405  -9.1550193954
Pt      5.6011209374      3.2334495598  -9.1586738019
Pt      2.8000264063      8.0837359302  -9.1553257441
Pt      1.3994054886      5.6593455473  -9.1563372894
Pt      9.7999474572      0.8092994730  -9.1596758107
Pt      7.0018499312      5.6593986278  -9.1568554686

```

|    |               |               |               |
|----|---------------|---------------|---------------|
| Pt | -0.0001211849 | 8.0833637168  | -9.1563992930 |
| Pt | 8.4021216468  | 3.2339349504  | -9.1571497279 |
| Pt | 5.6009449538  | 8.0824424589  | -9.1592713297 |
| Pt | -2.8004158998 | 4.8509939074  | -6.8815666430 |
| Pt | 5.6004313354  | -0.0001429049 | -6.8814694447 |
| Pt | 2.8006002839  | 4.8504547133  | -6.8820833284 |
| Pt | -4.2009252906 | 7.2783817714  | -6.8778480298 |
| Pt | 4.2001721338  | 2.4245963083  | -6.8842763990 |
| Pt | 1.3997249478  | 7.2757481955  | -6.8765443349 |
| Pt | -0.0002666832 | 4.8509769034  | -6.8766926825 |
| Pt | 8.4032606942  | -0.0013011326 | -6.8779807607 |
| Pt | 5.6011125333  | 4.8512626522  | -6.8841090186 |
| Pt | -1.3997895757 | 7.2754558719  | -6.8762644833 |
| Pt | 7.0019447519  | 2.4248075945  | -6.8844346420 |
| Pt | 4.2008015073  | 7.2780088733  | -6.8775735885 |
| Pt | -2.8018779002 | 6.4702570505  | -4.6041862148 |
| Pt | 5.6006312773  | 1.6162812043  | -4.6097436042 |
| Pt | 2.7995361521  | 6.4706290447  | -4.6049053572 |
| Pt | -4.2018405925 | 8.8932924103  | -4.5957724953 |
| Pt | 4.1985715046  | 4.0433162627  | -4.6099742925 |
| Pt | 1.4020407641  | 8.8923311251  | -4.6042801210 |
| Pt | -0.0013439271 | 6.4679478196  | -4.5986392287 |
| Pt | 8.3984106991  | 1.6185018296  | -4.6078209491 |
| Pt | 5.5999573640  | 6.4645652991  | -4.6070766413 |
| Pt | -1.4035567873 | 8.8924521683  | -4.6037677517 |
| Pt | 7.0014376041  | 4.0426223728  | -4.6096751251 |
| Pt | 4.2006966974  | 8.8930863714  | -4.5968098692 |
| Pt | -1.3998823889 | 5.6617997797  | -2.3214842517 |
| Pt | 7.0008289452  | 0.8090737123  | -2.3346781733 |
| Pt | 4.1982857950  | 5.6634219566  | -2.3346233121 |
| Pt | -2.7845834155 | 8.0753518864  | -2.2961764092 |
| Pt | 5.5978845785  | 3.2356209543  | -2.3334114783 |
| Pt | 2.7800795919  | 8.0752229669  | -2.2964069574 |
| Pt | 1.3958911652  | 5.6618422586  | -2.3219608996 |
| Pt | 9.8021670163  | 0.8084296280  | -2.3304914273 |
| Pt | 6.9986795151  | 5.6632228561  | -2.3347028795 |
| Pt | -0.0021048444 | 8.0829035886  | -2.3216673339 |
| Pt | 8.4008549545  | 3.2338633351  | -2.3348823694 |
| Pt | 5.5986198663  | 8.0890166152  | -2.3292124165 |
| Pt | -2.8337452045 | 4.8348451562  | -0.0363345366 |
| Pt | 5.5980706264  | 0.0374911755  | -0.0362181561 |
| Pt | 2.8310764467  | 4.8333409250  | -0.0357247609 |
| Pt | -4.2350147759 | 7.2789912322  | -0.0059721042 |
| Pt | 4.2034078669  | 2.4293081480  | -0.0124694694 |
| Pt | 1.4862839976  | 7.3271206454  | 0.0131883447  |
| Pt | -0.0010031750 | 4.7511976599  | 0.0125813130  |
| Pt | 8.4159292719  | 0.0289417431  | -0.0074563322 |
| Pt | 5.5991208346  | 4.8468336740  | -0.0125936069 |
| Pt | -1.4901367097 | 7.3281787812  | 0.0141950444  |
| Pt | 6.9944738418  | 2.4295971166  | -0.0124998870 |
| Pt | 4.2303538741  | 7.2790837545  | -0.0068676829 |
| O  | -0.0016407190 | 6.4688110696  | 1.1542039154  |

113

|                                      |                |              |                |
|--------------------------------------|----------------|--------------|----------------|
| TS, "top"-diffusion ENERGY(Rydberg)= | -5934.92587025 |              |                |
| Pt                                   | 0.0000000000   | 0.0000000000 | -13.7190560799 |
| Pt                                   | -1.4001952976  | 2.4252093963 | -13.7190560799 |
| Pt                                   | 2.8003905958   | 0.0000000000 | -13.7190560799 |
| Pt                                   | 1.4001952976   | 2.4252093963 | -13.7190560799 |
| Pt                                   | 0.0000000000   | 1.6168062642 | -11.4325467335 |
| Pt                                   | -1.4001952976  | 4.0420156606 | -11.4325467335 |
| Pt                                   | 2.8003905958   | 1.6168062642 | -11.4325467335 |
| Pt                                   | 1.4001952976   | 4.0420156606 | -11.4325467335 |
| Pt                                   | 1.4006436721   | 0.8101334430 | -9.1601480788  |

|    |               |               |                |
|----|---------------|---------------|----------------|
| Pt | -0.0000202849 | 3.2351189888  | -9.1533273147  |
| Pt | 4.2018795058  | 0.8096021163  | -9.1577529391  |
| Pt | 2.7999707660  | 3.2344556060  | -9.1548938563  |
| Pt | 0.0017228965  | -0.0014204955 | -6.8922945124  |
| Pt | -1.3992368598 | 2.4260493202  | -6.8752161141  |
| Pt | 2.7997524883  | 0.0011785659  | -6.8863071562  |
| Pt | 1.3998153177  | 2.4266421754  | -6.8771851690  |
| Pt | -0.0011479076 | 1.6193068146  | -4.6048999967  |
| Pt | -1.3954255144 | 4.0436192932  | -4.5886256398  |
| Pt | 2.8017774398  | 1.6211144579  | -4.6080855913  |
| Pt | 1.3944346513  | 4.0418485867  | -4.5900652197  |
| Pt | 1.3977456259  | 0.8083223166  | -2.3410734988  |
| Pt | -0.0053004113 | 3.2471057379  | -2.2802891996  |
| Pt | 4.1972560956  | 0.8079092005  | -2.3345146418  |
| Pt | 2.7987871017  | 3.2385257473  | -2.3245374673  |
| Pt | 0.0074937764  | -0.0081497791 | -0.0091722230  |
| Pt | -1.4063840980 | 2.4029721731  | -0.0037123983  |
| Pt | 2.8067185109  | -0.0062731037 | -0.0167547361  |
| Pt | 1.4183095486  | 2.3742399592  | -0.0155279189  |
| Pt | -2.8004007099 | 4.8504363116  | -13.7190560799 |
| Pt | 5.6008014199  | 0.0000000000  | -13.7190560799 |
| Pt | 2.8004007099  | 4.8504363116  | -13.7190560799 |
| Pt | -4.2005960076 | 7.2756457079  | -13.7190560799 |
| Pt | 4.2006061223  | 2.4252093963  | -13.7190560799 |
| Pt | 1.4002054123  | 7.2756457079  | -13.7190560799 |
| Pt | -0.0000101142 | 4.8504363116  | -13.7190560799 |
| Pt | 8.4011920156  | 0.0000000000  | -13.7190560799 |
| Pt | 5.6007913057  | 4.8504363116  | -13.7190560799 |
| Pt | -1.4002054123 | 7.2756457079  | -13.7190560799 |
| Pt | 7.0009967175  | 2.4252093963  | -13.7190560799 |
| Pt | 4.2005960076  | 7.2756457079  | -13.7190560799 |
| Pt | -2.8004007099 | 6.4672425758  | -11.4325467335 |
| Pt | 5.6008014199  | 1.6168062642  | -11.4325467335 |
| Pt | 2.8004007099  | 6.4672425758  | -11.4325467335 |
| Pt | -4.2005960076 | 8.8924519722  | -11.4325467335 |
| Pt | 4.2006061223  | 4.0420156606  | -11.4325467335 |
| Pt | 1.4002054123  | 8.8924519722  | -11.4325467335 |
| Pt | -0.0000101142 | 6.4672425758  | -11.4325467335 |
| Pt | 8.4011920156  | 1.6168062642  | -11.4325467335 |
| Pt | 5.6007913057  | 6.4672425758  | -11.4325467335 |
| Pt | -1.4002054123 | 8.8924519722  | -11.4325467335 |
| Pt | 7.0009967175  | 4.0420156606  | -11.4325467335 |
| Pt | 4.2005960076  | 8.8924519722  | -11.4325467335 |
| Pt | -1.3994867992 | 5.6585117403  | -9.1549661996  |
| Pt | 7.0017924480  | 0.8072644234  | -9.1562466405  |
| Pt | 4.1997378296  | 5.6594422646  | -9.1553308304  |
| Pt | -2.7996079511 | 8.0835354240  | -9.1602486630  |
| Pt | 5.6003751432  | 3.2340422270  | -9.1569220347  |
| Pt | 2.7991573931  | 8.0836786029  | -9.1528237015  |
| Pt | 1.3998736912  | 5.6592668801  | -9.1538025706  |
| Pt | 9.7996401215  | 0.8096621471  | -9.1580730682  |
| Pt | 7.0010434215  | 5.6572548562  | -9.1577740853  |
| Pt | 0.0004309417  | 8.0834015318  | -9.1555462804  |
| Pt | 8.4021366448  | 3.2339029613  | -9.1563549457  |
| Pt | 5.5996451723  | 8.0829558461  | -9.1592609192  |
| Pt | -2.7993308278 | 4.8496098969  | -6.8790639796  |
| Pt | 5.6039856306  | -0.0006213268 | -6.8798039735  |
| Pt | 2.8000410060  | 4.8516600714  | -6.8747684408  |
| Pt | -4.2012456750 | 7.2759524454  | -6.8853009427  |
| Pt | 4.2005956467  | 2.4263812464  | -6.8795531023  |
| Pt | 1.4007649717  | 7.2747798261  | -6.8703980188  |
| Pt | 0.0007584511  | 4.8498999428  | -6.8704299248  |
| Pt | 8.4021610341  | -0.0012294948 | -6.8746023022  |

|                                      |                |               |                |
|--------------------------------------|----------------|---------------|----------------|
| Pt                                   | 5.6000878029   | 4.8507037603  | -6.8796584853  |
| Pt                                   | -1.3992388998  | 7.2745319495  | -6.8801389057  |
| Pt                                   | 7.0016181510   | 2.4252153719  | -6.8846345150  |
| Pt                                   | 4.1989575273   | 7.2755571917  | -6.8746047460  |
| Pt                                   | -2.8004343166  | 6.4651086441  | -4.6075704044  |
| Pt                                   | 5.6025195468   | 1.6173486268  | -4.6086237198  |
| Pt                                   | 2.7965569463   | 6.4720030389  | -4.5891944811  |
| Pt                                   | -4.2024837878  | 8.8948371279  | -4.6100827349  |
| Pt                                   | 4.1962185694   | 4.0445507162  | -4.5983945948  |
| Pt                                   | 1.4026830651   | 8.8882708893  | -4.5881718520  |
| Pt                                   | -0.0039198602  | 6.4697088156  | -4.5929450186  |
| Pt                                   | 8.3987812911   | 1.6194099658  | -4.6064817748  |
| Pt                                   | 5.6000353557   | 6.4655710542  | -4.6057548799  |
| Pt                                   | -1.3976153144  | 8.8952131823  | -4.6157964053  |
| Pt                                   | 7.0012655027   | 4.0408088093  | -4.6084544475  |
| Pt                                   | 4.1971265951   | 8.8958579287  | -4.6013491406  |
| Pt                                   | -1.4013564489  | 5.6527766236  | -2.3107844925  |
| Pt                                   | 7.0011748598   | 0.8142875815  | -2.3287088717  |
| Pt                                   | 4.1966450003   | 5.6597476273  | -2.3255671225  |
| Pt                                   | -2.7982432580  | 8.0842439688  | -2.3494912722  |
| Pt                                   | 5.5998327227   | 3.2330166373  | -2.3314293775  |
| Pt                                   | 2.7861567489   | 8.0821359261  | -2.2785757468  |
| Pt                                   | 1.3902444325   | 5.6649046522  | -2.3021322650  |
| Pt                                   | 9.8019442812   | 0.8084226345  | -2.3279311787  |
| Pt                                   | 6.9992129968   | 5.6612448796  | -2.3344618735  |
| Pt                                   | 0.0040247965   | 8.0870283944  | -2.3118660649  |
| Pt                                   | 8.3953882881   | 3.2296757139  | -2.3284849048  |
| Pt                                   | 5.6016841540   | 8.0876318650  | -2.3411562181  |
| Pt                                   | -2.8146860316  | 4.8358407378  | -0.0175722814  |
| Pt                                   | 5.6036645930   | 0.0123861720  | -0.0175562937  |
| Pt                                   | 2.8597689702   | 4.8131148111  | -0.0221768129  |
| Pt                                   | -4.1944392851  | 7.2685889739  | -0.0168957812  |
| Pt                                   | 4.2153553425   | 2.4094970319  | -0.0070397026  |
| Pt                                   | 1.4535420937   | 7.2949978925  | 0.0695760621   |
| Pt                                   | 0.0025478439   | 4.7823582207  | 0.0613929098   |
| Pt                                   | 8.4122287976   | 0.0088955926  | -0.0030364023  |
| Pt                                   | 5.6191211679   | 4.8399888797  | -0.0079908865  |
| Pt                                   | -1.4393389944  | 7.2953723240  | -0.0501319764  |
| Pt                                   | 7.0051762495   | 2.4180972230  | -0.0046141872  |
| Pt                                   | 4.2502933963   | 7.2803846843  | -0.0212970947  |
| O                                    | 0.8746083990   | 5.9434547926  | 1.4256533107   |
| 113                                  |                |               |                |
| FS, "top"-diffusion ENERGY(Rydberg)= | -5934.93724979 |               |                |
| Pt                                   | 0.0000000000   | 0.0000000000  | -13.7190560799 |
| Pt                                   | -1.4001952976  | 2.4252093963  | -13.7190560799 |
| Pt                                   | 2.8003905958   | 0.0000000000  | -13.7190560799 |
| Pt                                   | 1.4001952976   | 2.4252093963  | -13.7190560799 |
| Pt                                   | 0.0000000000   | 1.6168062642  | -11.4325467335 |
| Pt                                   | -1.4001952976  | 4.0420156606  | -11.4325467335 |
| Pt                                   | 2.8003905958   | 1.6168062642  | -11.4325467335 |
| Pt                                   | 1.4001952976   | 4.0420156606  | -11.4325467335 |
| Pt                                   | 1.3999894611   | 0.8107467837  | -9.1606550701  |
| Pt                                   | -0.0000963727  | 3.2348872744  | -9.1542992650  |
| Pt                                   | 4.2026887096   | 0.8101371653  | -9.1582975863  |
| Pt                                   | 2.8002058751   | 3.2348476394  | -9.1542737659  |
| Pt                                   | 0.0004228058   | -0.0001741466 | -6.8922205438  |
| Pt                                   | -1.3998288180  | 2.4271996087  | -6.8777256452  |
| Pt                                   | 2.8007565463   | 0.0002512168  | -6.8917300674  |
| Pt                                   | 1.4004529051   | 2.4282912331  | -6.8772308634  |
| Pt                                   | -0.0016493121  | 1.6183896157  | -4.6095620243  |
| Pt                                   | -1.3951469992  | 4.0451694426  | -4.5911697772  |
| Pt                                   | 2.8014405524   | 1.6183797440  | -4.6087753407  |
| Pt                                   | 1.3996312467   | 4.0420839629  | -4.5872248474  |

|    |               |               |                |
|----|---------------|---------------|----------------|
| Pt | 1.3976878443  | 0.8103888460  | -2.3468875345  |
| Pt | -0.0074358063 | 3.2415908146  | -2.3062495341  |
| Pt | 4.1956569961  | 0.8079141044  | -2.3344397417  |
| Pt | 2.8037985946  | 3.2413675059  | -2.3068337567  |
| Pt | -0.0031100213 | 0.0019581981  | -0.0200447341  |
| Pt | -1.4172015648 | 2.4135259595  | -0.0131593451  |
| Pt | 2.7952139403  | 0.0015015469  | -0.0187389076  |
| Pt | 1.3967057204  | 2.3911784316  | -0.0294962268  |
| Pt | -2.8004007099 | 4.8504363116  | -13.7190560799 |
| Pt | 5.6008014199  | 0.0000000000  | -13.7190560799 |
| Pt | 2.8004007099  | 4.8504363116  | -13.7190560799 |
| Pt | -4.2005960076 | 7.2756457079  | -13.7190560799 |
| Pt | 4.2006061223  | 2.4252093963  | -13.7190560799 |
| Pt | 1.4002054123  | 7.2756457079  | -13.7190560799 |
| Pt | -0.0000101142 | 4.8504363116  | -13.7190560799 |
| Pt | 8.4011920156  | 0.0000000000  | -13.7190560799 |
| Pt | 5.6007913057  | 4.8504363116  | -13.7190560799 |
| Pt | -1.4002054123 | 7.2756457079  | -13.7190560799 |
| Pt | 7.0009967175  | 2.4252093963  | -13.7190560799 |
| Pt | 4.2005960076  | 7.2756457079  | -13.7190560799 |
| Pt | -2.8004007099 | 6.4672425758  | -11.4325467335 |
| Pt | 5.6008014199  | 1.6168062642  | -11.4325467335 |
| Pt | 2.8004007099  | 6.4672425758  | -11.4325467335 |
| Pt | -4.2005960076 | 8.8924519722  | -11.4325467335 |
| Pt | 4.2006061223  | 4.0420156606  | -11.4325467335 |
| Pt | 1.4002054123  | 8.8924519722  | -11.4325467335 |
| Pt | -0.0000101142 | 6.4672425758  | -11.4325467335 |
| Pt | 8.4011920156  | 1.6168062642  | -11.4325467335 |
| Pt | 5.6007913057  | 6.4672425758  | -11.4325467335 |
| Pt | -1.4002054123 | 8.8924519722  | -11.4325467335 |
| Pt | 7.0009967175  | 4.0420156606  | -11.4325467335 |
| Pt | 4.2005960076  | 8.8924519722  | -11.4325467335 |
| Pt | -1.3994025302 | 5.6587034902  | -9.1541327790  |
| Pt | 7.0008552332  | 0.8071056020  | -9.1564185845  |
| Pt | 4.1994500218  | 5.6584364730  | -9.1544924376  |
| Pt | -2.7991672434 | 8.0833637541  | -9.1608968869  |
| Pt | 5.5999276666  | 3.2340654375  | -9.1558709743  |
| Pt | 2.7993162531  | 8.0836442065  | -9.1543325018  |
| Pt | 1.4001546127  | 5.6588832395  | -9.1522817393  |
| Pt | 9.7989294586  | 0.8098797516  | -9.1578775220  |
| Pt | 7.0005595157  | 5.6561900676  | -9.1583252554  |
| Pt | 0.0005460450  | 8.0834242208  | -9.1541714993  |
| Pt | 8.4021456435  | 3.2344564216  | -9.1564750996  |
| Pt | 5.5987953785  | 8.0832638785  | -9.1607235322  |
| Pt | -2.7986797846 | 4.8493162326  | -6.8775623815  |
| Pt | 5.6027222666  | -0.0009083800 | -6.8776541771  |
| Pt | 2.7997054393  | 4.8509038607  | -6.8703795083  |
| Pt | -4.2005763333 | 7.2753960228  | -6.8917626659  |
| Pt | 4.2008497544  | 2.4269645177  | -6.8767191243  |
| Pt | 1.4005623104  | 7.2741988044  | -6.8702618285  |
| Pt | 0.0013735317  | 4.8509778082  | -6.8702591962  |
| Pt | 8.3998170163  | -0.0011865122 | -6.8776163625  |
| Pt | 5.5994729646  | 4.8493512820  | -6.8769881654  |
| Pt | -1.3970844066 | 7.2739775962  | -6.8776396182  |
| Pt | 7.0014221905  | 2.4250721856  | -6.8847544388  |
| Pt | 4.1982424975  | 7.2740861827  | -6.8773505453  |
| Pt | -2.7995681664 | 6.4653157430  | -4.6096009181  |
| Pt | 5.6023114735  | 1.6181865265  | -4.6083706114  |
| Pt | 2.8002569870  | 6.4678947548  | -4.5878078841  |
| Pt | -4.2003314099 | 8.8925679357  | -4.6186688786  |
| Pt | 4.1948068082  | 4.0452913883  | -4.5914467762  |
| Pt | 1.4001202747  | 8.8866509130  | -4.5914297518  |
| Pt | -0.0003970501 | 6.4675446131  | -4.5865671204  |

|    |               |              |               |
|----|---------------|--------------|---------------|
| Pt | 8.3991825748  | 1.6180813228 | -4.6091914738 |
| Pt | 5.6000821507  | 6.4657640670 | -4.6092780966 |
| Pt | -1.3981041269 | 8.8929370819 | -4.6097288189 |
| Pt | 7.0007640023  | 4.0402038603 | -4.6081878930 |
| Pt | 4.1986081022  | 8.8931644445 | -4.6097252409 |
| Pt | -1.3986713163 | 5.6528547177 | -2.3051172719 |
| Pt | 6.9985735752  | 0.8168254449 | -2.3314484643 |
| Pt | 4.1956605234  | 5.6522086461 | -2.3068952578 |
| Pt | -2.8023741340 | 8.0851936006 | -2.3465652736 |
| Pt | 5.6047843345  | 3.2314540471 | -2.3302401170 |
| Pt | 2.7898030432  | 8.0862837016 | -2.3063102050 |
| Pt | 1.3985554972  | 5.6599254920 | -2.2902350842 |
| Pt | 9.8018106402  | 0.8084184384 | -2.3349438645 |
| Pt | 6.9990842881  | 5.6635302880 | -2.3344351769 |
| Pt | 0.0058877209  | 8.0859852576 | -2.3057814476 |
| Pt | 8.3928684523  | 3.2316376739 | -2.3313633472 |
| Pt | 5.5981080118  | 8.0854684664 | -2.3466331846 |
| Pt | -2.8227568209 | 4.8481139800 | -0.0126458659 |
| Pt | 5.5915876187  | 0.0208541375 | -0.0131824404 |
| Pt | 2.8559092775  | 4.8185927608 | 0.0676554244  |
| Pt | -4.2046070849 | 7.2795662155 | -0.0192830616 |
| Pt | 4.2112536132  | 2.4116074992 | -0.0125311254 |
| Pt | 1.3959628309  | 7.3457208628 | 0.0723515298  |
| Pt | -0.0623348494 | 4.8193853883 | 0.0727752437  |
| Pt | 8.4027634582  | 0.0210230744 | -0.0136354500 |
| Pt | 5.6181534006  | 4.8483513751 | -0.0127988223 |
| Pt | -1.4359369454 | 7.2964715547 | -0.0287577448 |
| Pt | 6.9982863941  | 2.4271119485 | -0.0039001156 |
| Pt | 4.2284121865  | 7.2959067525 | -0.0299547418 |
| O  | 1.4003578699  | 5.6591446773 | 1.2736965256  |
