# Supplementary material for: Development of a ReaxFF potential for Pt–O systems describing the energetics and dynamics of Pt-oxide formation
Source: Royal Society of Chemistry journal article supplement (doi:10.1039/c4cp03111c), 2014-01-01
Supplement: c4cp03111c1.zip [file c4cp03111c1.zip]

```

XTLGRF 200
DESCRP IS
REMARK Pt111_0.33ML_9x9x7_30.0_vac fcc-displacement
FIXATOMS 1 162
CRYSTX 25.12092 25.12092 43.67409 90.00000 90.00000 60.00000
FORMAT ATOM (a6,lx,i5,lx,a5,lx,a3,lx,a1,lx,a5,3f10.5,lx,a5,i3,i2,lx,f8.5)
HETATM 1 Pt 2.20033 1.79823 14.95718 Pt 0 0 0.00000
HETATM 2 Pt 2.20033 10.17187 14.95718 Pt 0 0 0.00000
HETATM 3 Pt 2.20033 18.54551 14.95718 Pt 0 0 0.00000
HETATM 4 Pt 9.45211 5.98505 14.95718 Pt 0 0 0.00000
HETATM 5 Pt 9.45211 14.35869 14.95718 Pt 0 0 0.00000
HETATM 6 Pt 9.45211 22.73233 14.95718 Pt 0 0 0.00000
HETATM 7 Pt 16.70390 10.17187 14.95718 Pt 0 0 0.00000
HETATM 8 Pt 16.70390 18.54551 14.95718 Pt 0 0 0.00000
HETATM 9 Pt 16.70390 26.91915 14.95718 Pt 0 0 0.00000
HETATM 10 Pt 2.20033 21.33672 14.95718 Pt 0 0 0.00000
HETATM 11 Pt 2.20033 4.58944 14.95718 Pt 0 0 0.00000
HETATM 12 Pt 2.20033 12.96308 14.95718 Pt 0 0 0.00000
HETATM 13 Pt 9.45211 25.52354 14.95718 Pt 0 0 0.00000
HETATM 14 Pt 9.45211 8.77626 14.95718 Pt 0 0 0.00000
HETATM 15 Pt 9.45211 17.14990 14.95718 Pt 0 0 0.00000
HETATM 16 Pt 16.70390 29.71036 14.95718 Pt 0 0 0.00000
HETATM 17 Pt 16.70390 12.96308 14.95718 Pt 0 0 0.00000
HETATM 18 Pt 16.70390 21.33672 14.95718 Pt 0 0 0.00000
HETATM 19 Pt 2.20033 24.12793 14.95718 Pt 0 0 0.00000
HETATM 20 Pt 2.20033 7.38065 14.95718 Pt 0 0 0.00000
HETATM 21 Pt 2.20033 15.75429 14.95718 Pt 0 0 0.00000
HETATM 22 Pt 9.45211 28.31475 14.95718 Pt 0 0 0.00000
HETATM 23 Pt 9.45211 11.56747 14.95718 Pt 0 0 0.00000
HETATM 24 Pt 9.45211 19.94111 14.95718 Pt 0 0 0.00000
HETATM 25 Pt 16.70390 32.50157 14.95718 Pt 0 0 0.00000
HETATM 26 Pt 16.70390 15.75429 14.95718 Pt 0 0 0.00000
HETATM 27 Pt 16.70390 24.12793 14.95718 Pt 0 0 0.00000
HETATM 28 Pt 4.61759 3.19384 14.95718 Pt 0 0 0.00000
HETATM 29 Pt 4.61759 11.56748 14.95718 Pt 0 0 0.00000
HETATM 30 Pt 4.61759 19.94112 14.95718 Pt 0 0 0.00000
HETATM 31 Pt 11.86937 7.38066 14.95718 Pt 0 0 0.00000
HETATM 32 Pt 11.86937 15.75430 14.95718 Pt 0 0 0.00000
HETATM 33 Pt 11.86937 24.12794 14.95718 Pt 0 0 0.00000
HETATM 34 Pt 19.12116 11.56748 14.95718 Pt 0 0 0.00000
HETATM 35 Pt 19.12116 19.94112 14.95718 Pt 0 0 0.00000
HETATM 36 Pt 19.12116 28.31476 14.95718 Pt 0 0 0.00000
HETATM 37 Pt 4.61759 22.73233 14.95718 Pt 0 0 0.00000
HETATM 38 Pt 4.61759 5.98505 14.95718 Pt 0 0 0.00000
HETATM 39 Pt 4.61759 14.35869 14.95718 Pt 0 0 0.00000
HETATM 40 Pt 11.86937 26.91915 14.95718 Pt 0 0 0.00000
HETATM 41 Pt 11.86937 10.17187 14.95718 Pt 0 0 0.00000
HETATM 42 Pt 11.86937 18.54551 14.95718 Pt 0 0 0.00000
HETATM 43 Pt 19.12116 31.10597 14.95718 Pt 0 0 0.00000
HETATM 44 Pt 19.12116 14.35869 14.95718 Pt 0 0 0.00000
HETATM 45 Pt 19.12116 22.73233 14.95718 Pt 0 0 0.00000
HETATM 46 Pt 4.61759 25.52354 14.95718 Pt 0 0 0.00000
HETATM 47 Pt 4.61759 8.77626 14.95718 Pt 0 0 0.00000
HETATM 48 Pt 4.61759 17.14990 14.95718 Pt 0 0 0.00000
HETATM 49 Pt 11.86937 29.71036 14.95718 Pt 0 0 0.00000
HETATM 50 Pt 11.86937 12.96308 14.95718 Pt 0 0 0.00000
HETATM 51 Pt 11.86937 21.33672 14.95718 Pt 0 0 0.00000
HETATM 52 Pt 19.12116 33.89718 14.95718 Pt 0 0 0.00000
HETATM 53 Pt 19.12116 17.14990 14.95718 Pt 0 0 0.00000
HETATM 54 Pt 19.12116 25.52354 14.95718 Pt 0 0 0.00000
HETATM 55 Pt 7.03485 4.58944 14.95718 Pt 0 0 0.00000
HETATM 56 Pt 7.03485 12.96308 14.95718 Pt 0 0 0.00000
HETATM 57 Pt 7.03485 21.33672 14.95718 Pt 0 0 0.00000

```

|        |     |    |          |          |          |    |   |   |         |
|--------|-----|----|----------|----------|----------|----|---|---|---------|
| HETATM | 58  | Pt | 14.28663 | 8.77626  | 14.95718 | Pt | 0 | 0 | 0.00000 |
| HETATM | 59  | Pt | 14.28663 | 17.14990 | 14.95718 | Pt | 0 | 0 | 0.00000 |
| HETATM | 60  | Pt | 14.28663 | 25.52354 | 14.95718 | Pt | 0 | 0 | 0.00000 |
| HETATM | 61  | Pt | 21.53842 | 12.96308 | 14.95718 | Pt | 0 | 0 | 0.00000 |
| HETATM | 62  | Pt | 21.53842 | 21.33672 | 14.95718 | Pt | 0 | 0 | 0.00000 |
| HETATM | 63  | Pt | 21.53842 | 29.71036 | 14.95718 | Pt | 0 | 0 | 0.00000 |
| HETATM | 64  | Pt | 7.03485  | 24.12793 | 14.95718 | Pt | 0 | 0 | 0.00000 |
| HETATM | 65  | Pt | 7.03485  | 7.38065  | 14.95718 | Pt | 0 | 0 | 0.00000 |
| HETATM | 66  | Pt | 7.03485  | 15.75429 | 14.95718 | Pt | 0 | 0 | 0.00000 |
| HETATM | 67  | Pt | 14.28663 | 28.31475 | 14.95718 | Pt | 0 | 0 | 0.00000 |
| HETATM | 68  | Pt | 14.28663 | 11.56747 | 14.95718 | Pt | 0 | 0 | 0.00000 |
| HETATM | 69  | Pt | 14.28663 | 19.94111 | 14.95718 | Pt | 0 | 0 | 0.00000 |
| HETATM | 70  | Pt | 21.53842 | 32.50157 | 14.95718 | Pt | 0 | 0 | 0.00000 |
| HETATM | 71  | Pt | 21.53842 | 15.75429 | 14.95718 | Pt | 0 | 0 | 0.00000 |
| HETATM | 72  | Pt | 21.53842 | 24.12793 | 14.95718 | Pt | 0 | 0 | 0.00000 |
| HETATM | 73  | Pt | 7.03485  | 26.91915 | 14.95718 | Pt | 0 | 0 | 0.00000 |
| HETATM | 74  | Pt | 7.03485  | 10.17187 | 14.95718 | Pt | 0 | 0 | 0.00000 |
| HETATM | 75  | Pt | 7.03485  | 18.54551 | 14.95718 | Pt | 0 | 0 | 0.00000 |
| HETATM | 76  | Pt | 14.28663 | 31.10597 | 14.95718 | Pt | 0 | 0 | 0.00000 |
| HETATM | 77  | Pt | 14.28663 | 14.35869 | 14.95718 | Pt | 0 | 0 | 0.00000 |
| HETATM | 78  | Pt | 14.28663 | 22.73233 | 14.95718 | Pt | 0 | 0 | 0.00000 |
| HETATM | 79  | Pt | 21.53842 | 35.29279 | 14.95718 | Pt | 0 | 0 | 0.00000 |
| HETATM | 80  | Pt | 21.53842 | 18.54551 | 14.95718 | Pt | 0 | 0 | 0.00000 |
| HETATM | 81  | Pt | 21.53842 | 26.91915 | 14.95718 | Pt | 0 | 0 | 0.00000 |
| HETATM | 82  | Pt | 3.00608  | 19.94112 | 17.23620 | Pt | 0 | 0 | 0.00000 |
| HETATM | 83  | Pt | 3.00608  | 3.19384  | 17.23620 | Pt | 0 | 0 | 0.00000 |
| HETATM | 84  | Pt | 3.00608  | 11.56748 | 17.23620 | Pt | 0 | 0 | 0.00000 |
| HETATM | 85  | Pt | 10.25786 | 24.12794 | 17.23620 | Pt | 0 | 0 | 0.00000 |
| HETATM | 86  | Pt | 10.25786 | 7.38066  | 17.23620 | Pt | 0 | 0 | 0.00000 |
| HETATM | 87  | Pt | 10.25786 | 15.75430 | 17.23620 | Pt | 0 | 0 | 0.00000 |
| HETATM | 88  | Pt | 17.50965 | 28.31476 | 17.23620 | Pt | 0 | 0 | 0.00000 |
| HETATM | 89  | Pt | 17.50965 | 11.56748 | 17.23620 | Pt | 0 | 0 | 0.00000 |
| HETATM | 90  | Pt | 17.50965 | 19.94112 | 17.23620 | Pt | 0 | 0 | 0.00000 |
| HETATM | 91  | Pt | 3.00608  | 22.73233 | 17.23620 | Pt | 0 | 0 | 0.00000 |
| HETATM | 92  | Pt | 3.00608  | 5.98505  | 17.23620 | Pt | 0 | 0 | 0.00000 |
| HETATM | 93  | Pt | 3.00608  | 14.35869 | 17.23620 | Pt | 0 | 0 | 0.00000 |
| HETATM | 94  | Pt | 10.25786 | 26.91915 | 17.23620 | Pt | 0 | 0 | 0.00000 |
| HETATM | 95  | Pt | 10.25786 | 10.17187 | 17.23620 | Pt | 0 | 0 | 0.00000 |
| HETATM | 96  | Pt | 10.25786 | 18.54551 | 17.23620 | Pt | 0 | 0 | 0.00000 |
| HETATM | 97  | Pt | 17.50965 | 31.10597 | 17.23620 | Pt | 0 | 0 | 0.00000 |
| HETATM | 98  | Pt | 17.50965 | 14.35869 | 17.23620 | Pt | 0 | 0 | 0.00000 |
| HETATM | 99  | Pt | 17.50965 | 22.73233 | 17.23620 | Pt | 0 | 0 | 0.00000 |
| HETATM | 100 | Pt | 3.00608  | 25.52354 | 17.23620 | Pt | 0 | 0 | 0.00000 |
| HETATM | 101 | Pt | 3.00608  | 8.77626  | 17.23620 | Pt | 0 | 0 | 0.00000 |
| HETATM | 102 | Pt | 3.00608  | 17.14990 | 17.23620 | Pt | 0 | 0 | 0.00000 |
| HETATM | 103 | Pt | 10.25786 | 29.71036 | 17.23620 | Pt | 0 | 0 | 0.00000 |
| HETATM | 104 | Pt | 10.25786 | 12.96308 | 17.23620 | Pt | 0 | 0 | 0.00000 |
| HETATM | 105 | Pt | 10.25786 | 21.33672 | 17.23620 | Pt | 0 | 0 | 0.00000 |
| HETATM | 106 | Pt | 17.50965 | 33.89718 | 17.23620 | Pt | 0 | 0 | 0.00000 |
| HETATM | 107 | Pt | 17.50965 | 17.14990 | 17.23620 | Pt | 0 | 0 | 0.00000 |
| HETATM | 108 | Pt | 17.50965 | 25.52354 | 17.23620 | Pt | 0 | 0 | 0.00000 |
| HETATM | 109 | Pt | 5.42334  | 21.33672 | 17.23620 | Pt | 0 | 0 | 0.00000 |
| HETATM | 110 | Pt | 5.42334  | 4.58944  | 17.23620 | Pt | 0 | 0 | 0.00000 |
| HETATM | 111 | Pt | 5.42334  | 12.96308 | 17.23620 | Pt | 0 | 0 | 0.00000 |
| HETATM | 112 | Pt | 12.67512 | 25.52354 | 17.23620 | Pt | 0 | 0 | 0.00000 |
| HETATM | 113 | Pt | 12.67512 | 8.77626  | 17.23620 | Pt | 0 | 0 | 0.00000 |
| HETATM | 114 | Pt | 12.67512 | 17.14990 | 17.23620 | Pt | 0 | 0 | 0.00000 |
| HETATM | 115 | Pt | 19.92691 | 29.71036 | 17.23620 | Pt | 0 | 0 | 0.00000 |
| HETATM | 116 | Pt | 19.92691 | 12.96308 | 17.23620 | Pt | 0 | 0 | 0.00000 |
| HETATM | 117 | Pt | 19.92691 | 21.33672 | 17.23620 | Pt | 0 | 0 | 0.00000 |
| HETATM | 118 | Pt | 5.42334  | 24.12793 | 17.23620 | Pt | 0 | 0 | 0.00000 |
| HETATM | 119 | Pt | 5.42334  | 7.38065  | 17.23620 | Pt | 0 | 0 | 0.00000 |
| HETATM | 120 | Pt | 5.42334  | 15.75429 | 17.23620 | Pt | 0 | 0 | 0.00000 |

|        |     |    |          |          |          |    |   |   |         |
|--------|-----|----|----------|----------|----------|----|---|---|---------|
| HETATM | 121 | Pt | 12.67512 | 28.31475 | 17.23620 | Pt | 0 | 0 | 0.00000 |
| HETATM | 122 | Pt | 12.67512 | 11.56747 | 17.23620 | Pt | 0 | 0 | 0.00000 |
| HETATM | 123 | Pt | 12.67512 | 19.94111 | 17.23620 | Pt | 0 | 0 | 0.00000 |
| HETATM | 124 | Pt | 19.92691 | 32.50157 | 17.23620 | Pt | 0 | 0 | 0.00000 |
| HETATM | 125 | Pt | 19.92691 | 15.75429 | 17.23620 | Pt | 0 | 0 | 0.00000 |
| HETATM | 126 | Pt | 19.92691 | 24.12793 | 17.23620 | Pt | 0 | 0 | 0.00000 |
| HETATM | 127 | Pt | 5.42334  | 26.91915 | 17.23620 | Pt | 0 | 0 | 0.00000 |
| HETATM | 128 | Pt | 5.42334  | 10.17187 | 17.23620 | Pt | 0 | 0 | 0.00000 |
| HETATM | 129 | Pt | 5.42334  | 18.54551 | 17.23620 | Pt | 0 | 0 | 0.00000 |
| HETATM | 130 | Pt | 12.67512 | 31.10597 | 17.23620 | Pt | 0 | 0 | 0.00000 |
| HETATM | 131 | Pt | 12.67512 | 14.35869 | 17.23620 | Pt | 0 | 0 | 0.00000 |
| HETATM | 132 | Pt | 12.67512 | 22.73233 | 17.23620 | Pt | 0 | 0 | 0.00000 |
| HETATM | 133 | Pt | 19.92691 | 35.29279 | 17.23620 | Pt | 0 | 0 | 0.00000 |
| HETATM | 134 | Pt | 19.92691 | 18.54551 | 17.23620 | Pt | 0 | 0 | 0.00000 |
| HETATM | 135 | Pt | 19.92691 | 26.91915 | 17.23620 | Pt | 0 | 0 | 0.00000 |
| HETATM | 136 | Pt | 7.84060  | 22.73233 | 17.23620 | Pt | 0 | 0 | 0.00000 |
| HETATM | 137 | Pt | 7.84060  | 5.98505  | 17.23620 | Pt | 0 | 0 | 0.00000 |
| HETATM | 138 | Pt | 7.84060  | 14.35869 | 17.23620 | Pt | 0 | 0 | 0.00000 |
| HETATM | 139 | Pt | 15.09238 | 26.91915 | 17.23620 | Pt | 0 | 0 | 0.00000 |
| HETATM | 140 | Pt | 15.09238 | 10.17187 | 17.23620 | Pt | 0 | 0 | 0.00000 |
| HETATM | 141 | Pt | 15.09238 | 18.54551 | 17.23620 | Pt | 0 | 0 | 0.00000 |
| HETATM | 142 | Pt | 0.58881  | 18.54551 | 17.23620 | Pt | 0 | 0 | 0.00000 |
| HETATM | 143 | Pt | 0.58881  | 1.79823  | 17.23620 | Pt | 0 | 0 | 0.00000 |
| HETATM | 144 | Pt | 0.58881  | 10.17187 | 17.23620 | Pt | 0 | 0 | 0.00000 |
| HETATM | 145 | Pt | 7.84060  | 25.52354 | 17.23620 | Pt | 0 | 0 | 0.00000 |
| HETATM | 146 | Pt | 7.84060  | 8.77626  | 17.23620 | Pt | 0 | 0 | 0.00000 |
| HETATM | 147 | Pt | 7.84060  | 17.14990 | 17.23620 | Pt | 0 | 0 | 0.00000 |
| HETATM | 148 | Pt | 15.09238 | 29.71036 | 17.23620 | Pt | 0 | 0 | 0.00000 |
| HETATM | 149 | Pt | 15.09238 | 12.96308 | 17.23620 | Pt | 0 | 0 | 0.00000 |
| HETATM | 150 | Pt | 15.09238 | 21.33672 | 17.23620 | Pt | 0 | 0 | 0.00000 |
| HETATM | 151 | Pt | 0.58881  | 21.33672 | 17.23620 | Pt | 0 | 0 | 0.00000 |
| HETATM | 152 | Pt | 0.58881  | 4.58944  | 17.23620 | Pt | 0 | 0 | 0.00000 |
| HETATM | 153 | Pt | 0.58881  | 12.96308 | 17.23620 | Pt | 0 | 0 | 0.00000 |
| HETATM | 154 | Pt | 7.84060  | 28.31475 | 17.23620 | Pt | 0 | 0 | 0.00000 |
| HETATM | 155 | Pt | 7.84060  | 11.56747 | 17.23620 | Pt | 0 | 0 | 0.00000 |
| HETATM | 156 | Pt | 7.84060  | 19.94111 | 17.23620 | Pt | 0 | 0 | 0.00000 |
| HETATM | 157 | Pt | 15.09238 | 32.50157 | 17.23620 | Pt | 0 | 0 | 0.00000 |
| HETATM | 158 | Pt | 15.09238 | 15.75429 | 17.23620 | Pt | 0 | 0 | 0.00000 |
| HETATM | 159 | Pt | 15.09238 | 24.12793 | 17.23620 | Pt | 0 | 0 | 0.00000 |
| HETATM | 160 | Pt | 0.58881  | 24.12793 | 17.23620 | Pt | 0 | 0 | 0.00000 |
| HETATM | 161 | Pt | 0.58881  | 7.38065  | 17.23620 | Pt | 0 | 0 | 0.00000 |
| HETATM | 162 | Pt | 0.58881  | 15.75429 | 17.23620 | Pt | 0 | 0 | 0.00000 |
| HETATM | 163 | Pt | 3.81166  | 21.33642 | 19.51580 | Pt | 0 | 0 | 0.00000 |
| HETATM | 164 | Pt | 3.81203  | 4.58919  | 19.51600 | Pt | 0 | 0 | 0.00000 |
| HETATM | 165 | Pt | 3.81200  | 12.96303 | 19.51527 | Pt | 0 | 0 | 0.00000 |
| HETATM | 166 | Pt | 11.06330 | 25.52359 | 19.51600 | Pt | 0 | 0 | 0.00000 |
| HETATM | 167 | Pt | 11.06285 | 8.77494  | 19.51263 | Pt | 0 | 0 | 0.00000 |
| HETATM | 168 | Pt | 11.06296 | 17.15086 | 19.51363 | Pt | 0 | 0 | 0.00000 |
| HETATM | 169 | Pt | 18.31527 | 29.71048 | 19.51527 | Pt | 0 | 0 | 0.00000 |
| HETATM | 170 | Pt | 18.31656 | 12.96299 | 19.51363 | Pt | 0 | 0 | 0.00000 |
| HETATM | 171 | Pt | 18.31555 | 21.33699 | 19.51423 | Pt | 0 | 0 | 0.00000 |
| HETATM | 172 | Pt | 3.81185  | 24.12759 | 19.51588 | Pt | 0 | 0 | 0.00000 |
| HETATM | 173 | Pt | 3.81235  | 7.38060  | 19.51559 | Pt | 0 | 0 | 0.00000 |
| HETATM | 174 | Pt | 3.81191  | 15.75418 | 19.51546 | Pt | 0 | 0 | 0.00000 |
| HETATM | 175 | Pt | 11.06334 | 28.31440 | 19.51578 | Pt | 0 | 0 | 0.00000 |
| HETATM | 176 | Pt | 11.06278 | 11.56695 | 19.51199 | Pt | 0 | 0 | 0.00000 |
| HETATM | 177 | Pt | 11.06314 | 19.94215 | 19.51488 | Pt | 0 | 0 | 0.00000 |
| HETATM | 178 | Pt | 18.31543 | 32.50164 | 19.51580 | Pt | 0 | 0 | 0.00000 |
| HETATM | 179 | Pt | 18.31648 | 15.75444 | 19.51339 | Pt | 0 | 0 | 0.00000 |
| HETATM | 180 | Pt | 18.31540 | 24.12824 | 19.51474 | Pt | 0 | 0 | 0.00000 |
| HETATM | 181 | Pt | 3.81181  | 26.91884 | 19.51609 | Pt | 0 | 0 | 0.00000 |
| HETATM | 182 | Pt | 3.81222  | 10.17194 | 19.51531 | Pt | 0 | 0 | 0.00000 |
| HETATM | 183 | Pt | 3.81169  | 18.54535 | 19.51571 | Pt | 0 | 0 | 0.00000 |

|        |     |    |          |          |          |    |   |   |         |
|--------|-----|----|----------|----------|----------|----|---|---|---------|
| HETATM | 184 | Pt | 11.06294 | 31.10483 | 19.51433 | Pt | 0 | 0 | 0.00000 |
| HETATM | 185 | Pt | 11.06267 | 14.35921 | 19.51246 | Pt | 0 | 0 | 0.00000 |
| HETATM | 186 | Pt | 11.06320 | 22.73293 | 19.51576 | Pt | 0 | 0 | 0.00000 |
| HETATM | 187 | Pt | 18.31632 | 35.29275 | 19.51479 | Pt | 0 | 0 | 0.00000 |
| HETATM | 188 | Pt | 18.31592 | 18.54575 | 19.51388 | Pt | 0 | 0 | 0.00000 |
| HETATM | 189 | Pt | 18.31527 | 26.91942 | 19.51501 | Pt | 0 | 0 | 0.00000 |
| HETATM | 190 | Pt | 6.22878  | 22.73217 | 19.51588 | Pt | 0 | 0 | 0.00000 |
| HETATM | 191 | Pt | 6.22893  | 5.98463  | 19.51578 | Pt | 0 | 0 | 0.00000 |
| HETATM | 192 | Pt | 6.22913  | 14.35875 | 19.51580 | Pt | 0 | 0 | 0.00000 |
| HETATM | 193 | Pt | 13.48057 | 26.91957 | 19.51559 | Pt | 0 | 0 | 0.00000 |
| HETATM | 194 | Pt | 13.48084 | 10.17089 | 19.51199 | Pt | 0 | 0 | 0.00000 |
| HETATM | 195 | Pt | 13.48046 | 18.54651 | 19.51339 | Pt | 0 | 0 | 0.00000 |
| HETATM | 196 | Pt | 20.73252 | 31.10598 | 19.51546 | Pt | 0 | 0 | 0.00000 |
| HETATM | 197 | Pt | 20.73379 | 14.35879 | 19.51488 | Pt | 0 | 0 | 0.00000 |
| HETATM | 198 | Pt | 20.73293 | 22.73248 | 19.51474 | Pt | 0 | 0 | 0.00000 |
| HETATM | 199 | Pt | 6.22878  | 25.52301 | 19.51600 | Pt | 0 | 0 | 0.00000 |
| HETATM | 200 | Pt | 6.22928  | 8.77615  | 19.51571 | Pt | 0 | 0 | 0.00000 |
| HETATM | 201 | Pt | 6.22891  | 17.14985 | 19.51567 | Pt | 0 | 0 | 0.00000 |
| HETATM | 202 | Pt | 13.48068 | 29.71047 | 19.51571 | Pt | 0 | 0 | 0.00000 |
| HETATM | 203 | Pt | 13.48068 | 12.96274 | 19.51135 | Pt | 0 | 0 | 0.00000 |
| HETATM | 204 | Pt | 13.48045 | 21.33742 | 19.51488 | Pt | 0 | 0 | 0.00000 |
| HETATM | 205 | Pt | 20.73271 | 33.89699 | 19.51567 | Pt | 0 | 0 | 0.00000 |
| HETATM | 206 | Pt | 20.73348 | 17.14988 | 19.51488 | Pt | 0 | 0 | 0.00000 |
| HETATM | 207 | Pt | 20.73270 | 25.52361 | 19.51497 | Pt | 0 | 0 | 0.00000 |
| HETATM | 208 | Pt | 6.22874  | 28.31408 | 19.51591 | Pt | 0 | 0 | 0.00000 |
| HETATM | 209 | Pt | 6.22939  | 11.56758 | 19.51580 | Pt | 0 | 0 | 0.00000 |
| HETATM | 210 | Pt | 6.22883  | 19.94115 | 19.51561 | Pt | 0 | 0 | 0.00000 |
| HETATM | 211 | Pt | 13.48083 | 32.50085 | 19.51419 | Pt | 0 | 0 | 0.00000 |
| HETATM | 212 | Pt | 13.48060 | 15.75470 | 19.51213 | Pt | 0 | 0 | 0.00000 |
| HETATM | 213 | Pt | 13.48054 | 24.12845 | 19.51543 | Pt | 0 | 0 | 0.00000 |
| HETATM | 214 | Pt | 20.73361 | 36.68844 | 19.51517 | Pt | 0 | 0 | 0.00000 |
| HETATM | 215 | Pt | 20.73338 | 19.94116 | 19.51459 | Pt | 0 | 0 | 0.00000 |
| HETATM | 216 | Pt | 20.73268 | 28.31481 | 19.51514 | Pt | 0 | 0 | 0.00000 |
| HETATM | 217 | Pt | 8.64610  | 24.12776 | 19.51609 | Pt | 0 | 0 | 0.00000 |
| HETATM | 218 | Pt | 8.64571  | 7.37950  | 19.51433 | Pt | 0 | 0 | 0.00000 |
| HETATM | 219 | Pt | 8.64586  | 15.75507 | 19.51479 | Pt | 0 | 0 | 0.00000 |
| HETATM | 220 | Pt | 15.89800 | 28.31513 | 19.51530 | Pt | 0 | 0 | 0.00000 |
| HETATM | 221 | Pt | 15.89906 | 11.56692 | 19.51246 | Pt | 0 | 0 | 0.00000 |
| HETATM | 222 | Pt | 15.89808 | 19.94169 | 19.51388 | Pt | 0 | 0 | 0.00000 |
| HETATM | 223 | Pt | 1.39451  | 19.94091 | 19.51571 | Pt | 0 | 0 | 0.00000 |
| HETATM | 224 | Pt | 1.39530  | 3.19378  | 19.51576 | Pt | 0 | 0 | 0.00000 |
| HETATM | 225 | Pt | 1.39487  | 11.56749 | 19.51501 | Pt | 0 | 0 | 0.00000 |
| HETATM | 226 | Pt | 8.64595  | 26.91850 | 19.51591 | Pt | 0 | 0 | 0.00000 |
| HETATM | 227 | Pt | 8.64575  | 10.17146 | 19.51419 | Pt | 0 | 0 | 0.00000 |
| HETATM | 228 | Pt | 8.64592  | 18.54635 | 19.51517 | Pt | 0 | 0 | 0.00000 |
| HETATM | 229 | Pt | 15.89809 | 31.10628 | 19.51580 | Pt | 0 | 0 | 0.00000 |
| HETATM | 230 | Pt | 15.89863 | 14.35865 | 19.51212 | Pt | 0 | 0 | 0.00000 |
| HETATM | 231 | Pt | 15.89782 | 22.73297 | 19.51459 | Pt | 0 | 0 | 0.00000 |
| HETATM | 232 | Pt | 1.39473  | 22.73212 | 19.51561 | Pt | 0 | 0 | 0.00000 |
| HETATM | 233 | Pt | 1.39518  | 5.98501  | 19.51543 | Pt | 0 | 0 | 0.00000 |
| HETATM | 234 | Pt | 1.39461  | 14.35873 | 19.51514 | Pt | 0 | 0 | 0.00000 |
| HETATM | 235 | Pt | 8.64564  | 29.70912 | 19.51519 | Pt | 0 | 0 | 0.00000 |
| HETATM | 236 | Pt | 8.64576  | 12.96335 | 19.51456 | Pt | 0 | 0 | 0.00000 |
| HETATM | 237 | Pt | 8.64599  | 21.33705 | 19.51582 | Pt | 0 | 0 | 0.00000 |
| HETATM | 238 | Pt | 15.89867 | 33.89680 | 19.51456 | Pt | 0 | 0 | 0.00000 |
| HETATM | 239 | Pt | 15.89839 | 17.15034 | 19.51258 | Pt | 0 | 0 | 0.00000 |
| HETATM | 240 | Pt | 15.89783 | 25.52397 | 19.51502 | Pt | 0 | 0 | 0.00000 |
| HETATM | 241 | Pt | 1.39504  | 25.52339 | 19.51582 | Pt | 0 | 0 | 0.00000 |
| HETATM | 242 | Pt | 1.39509  | 8.77621  | 19.51502 | Pt | 0 | 0 | 0.00000 |
| HETATM | 243 | Pt | 1.39451  | 17.14978 | 19.51540 | Pt | 0 | 0 | 0.00000 |
| HETATM | 244 | Pt | 2.19970  | 1.79744  | 21.79606 | Pt | 0 | 0 | 0.00000 |
| HETATM | 245 | Pt | 2.20067  | 10.17153 | 21.79387 | Pt | 0 | 0 | 0.00000 |
| HETATM | 246 | Pt | 2.19976  | 18.54453 | 21.79507 | Pt | 0 | 0 | 0.00000 |

|        |     |    |          |          |          |    |   |   |         |
|--------|-----|----|----------|----------|----------|----|---|---|---------|
| HETATM | 247 | Pt | 9.45055  | 5.98235  | 21.79275 | Pt | 0 | 0 | 0.00000 |
| HETATM | 248 | Pt | 9.45088  | 14.35950 | 21.79191 | Pt | 0 | 0 | 0.00000 |
| HETATM | 249 | Pt | 9.45173  | 22.73140 | 21.79606 | Pt | 0 | 0 | 0.00000 |
| HETATM | 250 | Pt | 16.70521 | 10.17121 | 21.79191 | Pt | 0 | 0 | 0.00000 |
| HETATM | 251 | Pt | 16.70401 | 18.54571 | 21.79043 | Pt | 0 | 0 | 0.00000 |
| HETATM | 252 | Pt | 16.70343 | 26.91928 | 21.79387 | Pt | 0 | 0 | 0.00000 |
| HETATM | 253 | Pt | 2.19962  | 21.33667 | 21.79524 | Pt | 0 | 0 | 0.00000 |
| HETATM | 254 | Pt | 2.20021  | 4.59005  | 21.79563 | Pt | 0 | 0 | 0.00000 |
| HETATM | 255 | Pt | 2.20030  | 12.96373 | 21.79393 | Pt | 0 | 0 | 0.00000 |
| HETATM | 256 | Pt | 9.45163  | 25.52311 | 21.79603 | Pt | 0 | 0 | 0.00000 |
| HETATM | 257 | Pt | 9.45070  | 8.77491  | 21.79038 | Pt | 0 | 0 | 0.00000 |
| HETATM | 258 | Pt | 9.45169  | 17.15173 | 21.79314 | Pt | 0 | 0 | 0.00000 |
| HETATM | 259 | Pt | 16.70350 | 29.71156 | 21.79451 | Pt | 0 | 0 | 0.00000 |
| HETATM | 260 | Pt | 16.70449 | 12.96315 | 21.78843 | Pt | 0 | 0 | 0.00000 |
| HETATM | 261 | Pt | 16.70366 | 21.33827 | 21.79178 | Pt | 0 | 0 | 0.00000 |
| HETATM | 262 | Pt | 2.20065  | 24.12738 | 21.79533 | Pt | 0 | 0 | 0.00000 |
| HETATM | 263 | Pt | 2.20167  | 7.38082  | 21.79443 | Pt | 0 | 0 | 0.00000 |
| HETATM | 264 | Pt | 2.20103  | 15.75415 | 21.79440 | Pt | 0 | 0 | 0.00000 |
| HETATM | 265 | Pt | 9.45209  | 28.31334 | 21.79512 | Pt | 0 | 0 | 0.00000 |
| HETATM | 266 | Pt | 9.45162  | 11.56743 | 21.79077 | Pt | 0 | 0 | 0.00000 |
| HETATM | 267 | Pt | 9.45275  | 19.94146 | 21.79503 | Pt | 0 | 0 | 0.00000 |
| HETATM | 268 | Pt | 16.70434 | 32.50226 | 21.79600 | Pt | 0 | 0 | 0.00000 |
| HETATM | 269 | Pt | 16.70537 | 15.75490 | 21.78796 | Pt | 0 | 0 | 0.00000 |
| HETATM | 270 | Pt | 16.70438 | 24.12882 | 21.79320 | Pt | 0 | 0 | 0.00000 |
| HETATM | 271 | Pt | 4.61745  | 3.19321  | 21.79603 | Pt | 0 | 0 | 0.00000 |
| HETATM | 272 | Pt | 4.61882  | 11.56774 | 21.79451 | Pt | 0 | 0 | 0.00000 |
| HETATM | 273 | Pt | 4.61789  | 19.94048 | 21.79524 | Pt | 0 | 0 | 0.00000 |
| HETATM | 274 | Pt | 11.86890 | 7.37876  | 21.79038 | Pt | 0 | 0 | 0.00000 |
| HETATM | 275 | Pt | 11.86913 | 15.75484 | 21.78843 | Pt | 0 | 0 | 0.00000 |
| HETATM | 276 | Pt | 11.86996 | 24.12814 | 21.79563 | Pt | 0 | 0 | 0.00000 |
| HETATM | 277 | Pt | 19.12295 | 11.56803 | 21.79314 | Pt | 0 | 0 | 0.00000 |
| HETATM | 278 | Pt | 19.12261 | 19.94169 | 21.79178 | Pt | 0 | 0 | 0.00000 |
| HETATM | 279 | Pt | 19.12172 | 28.31506 | 21.79393 | Pt | 0 | 0 | 0.00000 |
| HETATM | 280 | Pt | 4.61682  | 22.73100 | 21.79563 | Pt | 0 | 0 | 0.00000 |
| HETATM | 281 | Pt | 4.61736  | 5.98445  | 21.79557 | Pt | 0 | 0 | 0.00000 |
| HETATM | 282 | Pt | 4.61759  | 14.35787 | 21.79473 | Pt | 0 | 0 | 0.00000 |
| HETATM | 283 | Pt | 11.86896 | 26.91865 | 21.79557 | Pt | 0 | 0 | 0.00000 |
| HETATM | 284 | Pt | 11.86828 | 10.16999 | 21.78632 | Pt | 0 | 0 | 0.00000 |
| HETATM | 285 | Pt | 11.86870 | 18.54628 | 21.79150 | Pt | 0 | 0 | 0.00000 |
| HETATM | 286 | Pt | 19.12045 | 31.10556 | 21.79473 | Pt | 0 | 0 | 0.00000 |
| HETATM | 287 | Pt | 19.12216 | 14.35849 | 21.79150 | Pt | 0 | 0 | 0.00000 |
| HETATM | 288 | Pt | 19.12118 | 22.73237 | 21.79273 | Pt | 0 | 0 | 0.00000 |
| HETATM | 289 | Pt | 4.61669  | 25.52319 | 21.79585 | Pt | 0 | 0 | 0.00000 |
| HETATM | 290 | Pt | 4.61803  | 8.77714  | 21.79482 | Pt | 0 | 0 | 0.00000 |
| HETATM | 291 | Pt | 4.61736  | 17.14982 | 21.79506 | Pt | 0 | 0 | 0.00000 |
| HETATM | 292 | Pt | 11.86885 | 29.71067 | 21.79490 | Pt | 0 | 0 | 0.00000 |
| HETATM | 293 | Pt | 11.86760 | 12.96336 | 21.78578 | Pt | 0 | 0 | 0.00000 |
| HETATM | 294 | Pt | 11.86892 | 21.33804 | 21.79450 | Pt | 0 | 0 | 0.00000 |
| HETATM | 295 | Pt | 19.12039 | 33.89776 | 21.79540 | Pt | 0 | 0 | 0.00000 |
| HETATM | 296 | Pt | 19.12148 | 17.15086 | 21.79217 | Pt | 0 | 0 | 0.00000 |
| HETATM | 297 | Pt | 19.12088 | 25.52453 | 21.79357 | Pt | 0 | 0 | 0.00000 |
| HETATM | 298 | Pt | 7.03363  | 4.58872  | 21.79512 | Pt | 0 | 0 | 0.00000 |
| HETATM | 299 | Pt | 7.03521  | 12.96381 | 21.79600 | Pt | 0 | 0 | 0.00000 |
| HETATM | 300 | Pt | 7.03421  | 21.33673 | 21.79533 | Pt | 0 | 0 | 0.00000 |
| HETATM | 301 | Pt | 14.28683 | 8.77581  | 21.79077 | Pt | 0 | 0 | 0.00000 |
| HETATM | 302 | Pt | 14.28642 | 17.15148 | 21.78796 | Pt | 0 | 0 | 0.00000 |
| HETATM | 303 | Pt | 14.28610 | 25.52479 | 21.79443 | Pt | 0 | 0 | 0.00000 |
| HETATM | 304 | Pt | 21.53839 | 12.96381 | 21.79503 | Pt | 0 | 0 | 0.00000 |
| HETATM | 305 | Pt | 21.53894 | 21.33758 | 21.79320 | Pt | 0 | 0 | 0.00000 |
| HETATM | 306 | Pt | 21.53794 | 29.71090 | 21.79440 | Pt | 0 | 0 | 0.00000 |
| HETATM | 307 | Pt | 7.03498  | 24.12698 | 21.79585 | Pt | 0 | 0 | 0.00000 |
| HETATM | 308 | Pt | 7.03537  | 7.38036  | 21.79490 | Pt | 0 | 0 | 0.00000 |
| HETATM | 309 | Pt | 7.03573  | 15.75392 | 21.79540 | Pt | 0 | 0 | 0.00000 |

|        |     |    |          |          |          |    |   |   |         |
|--------|-----|----|----------|----------|----------|----|---|---|---------|
| HETATM | 310 | Pt | 14.28717 | 28.31558 | 21.79482 | Pt | 0 | 0 | 0.00000 |
| HETATM | 311 | Pt | 14.28776 | 11.56608 | 21.78578 | Pt | 0 | 0 | 0.00000 |
| HETATM | 312 | Pt | 14.28730 | 19.94187 | 21.79217 | Pt | 0 | 0 | 0.00000 |
| HETATM | 313 | Pt | 21.53845 | 32.50134 | 21.79506 | Pt | 0 | 0 | 0.00000 |
| HETATM | 314 | Pt | 21.53979 | 15.75457 | 21.79450 | Pt | 0 | 0 | 0.00000 |
| HETATM | 315 | Pt | 21.53941 | 24.12819 | 21.79357 | Pt | 0 | 0 | 0.00000 |
| HETATM | 316 | Pt | 7.03387  | 26.91746 | 21.79572 | Pt | 0 | 0 | 0.00000 |
| HETATM | 317 | Pt | 7.03527  | 10.17186 | 21.79542 | Pt | 0 | 0 | 0.00000 |
| HETATM | 318 | Pt | 7.03434  | 18.54474 | 21.79463 | Pt | 0 | 0 | 0.00000 |
| HETATM | 319 | Pt | 14.28641 | 31.10633 | 21.79542 | Pt | 0 | 0 | 0.00000 |
| HETATM | 320 | Pt | 14.28621 | 14.35795 | 21.78644 | Pt | 0 | 0 | 0.00000 |
| HETATM | 321 | Pt | 14.28618 | 22.73250 | 21.79386 | Pt | 0 | 0 | 0.00000 |
| HETATM | 322 | Pt | 21.53800 | 35.29197 | 21.79463 | Pt | 0 | 0 | 0.00000 |
| HETATM | 323 | Pt | 21.53879 | 18.54521 | 21.79386 | Pt | 0 | 0 | 0.00000 |
| HETATM | 324 | Pt | 21.53820 | 26.91877 | 21.79391 | Pt | 0 | 0 | 0.00000 |
| HETATM | 325 | Pt | 3.00547  | 19.94007 | 24.07048 | Pt | 0 | 0 | 0.00000 |
| HETATM | 326 | Pt | 3.00375  | 3.19369  | 24.07209 | Pt | 0 | 0 | 0.00000 |
| HETATM | 327 | Pt | 3.00684  | 11.56799 | 24.06847 | Pt | 0 | 0 | 0.00000 |
| HETATM | 328 | Pt | 10.25890 | 24.12585 | 24.07209 | Pt | 0 | 0 | 0.00000 |
| HETATM | 329 | Pt | 10.25643 | 7.37817  | 24.06370 | Pt | 0 | 0 | 0.00000 |
| HETATM | 330 | Pt | 10.25853 | 15.75601 | 24.06533 | Pt | 0 | 0 | 0.00000 |
| HETATM | 331 | Pt | 17.50971 | 28.31567 | 24.06847 | Pt | 0 | 0 | 0.00000 |
| HETATM | 332 | Pt | 17.51080 | 11.56891 | 24.06533 | Pt | 0 | 0 | 0.00000 |
| HETATM | 333 | Pt | 17.51065 | 19.94285 | 24.06343 | Pt | 0 | 0 | 0.00000 |
| HETATM | 334 | Pt | 3.00481  | 22.73140 | 24.07723 | Pt | 0 | 0 | 0.00000 |
| HETATM | 335 | Pt | 3.00551  | 5.98551  | 24.07721 | Pt | 0 | 0 | 0.00000 |
| HETATM | 336 | Pt | 3.00679  | 14.35860 | 24.07552 | Pt | 0 | 0 | 0.00000 |
| HETATM | 337 | Pt | 10.25809 | 26.91768 | 24.07749 | Pt | 0 | 0 | 0.00000 |
| HETATM | 338 | Pt | 10.25690 | 10.16950 | 24.06416 | Pt | 0 | 0 | 0.00000 |
| HETATM | 339 | Pt | 10.26073 | 18.54443 | 24.07593 | Pt | 0 | 0 | 0.00000 |
| HETATM | 340 | Pt | 17.50877 | 31.10727 | 24.07667 | Pt | 0 | 0 | 0.00000 |
| HETATM | 341 | Pt | 17.50843 | 14.35885 | 24.06545 | Pt | 0 | 0 | 0.00000 |
| HETATM | 342 | Pt | 17.51010 | 22.73365 | 24.07265 | Pt | 0 | 0 | 0.00000 |
| HETATM | 343 | Pt | 3.00426  | 25.52280 | 24.07758 | Pt | 0 | 0 | 0.00000 |
| HETATM | 344 | Pt | 3.00696  | 8.77692  | 24.07538 | Pt | 0 | 0 | 0.00000 |
| HETATM | 345 | Pt | 3.00645  | 17.14911 | 24.07644 | Pt | 0 | 0 | 0.00000 |
| HETATM | 346 | Pt | 10.25729 | 29.70875 | 24.07521 | Pt | 0 | 0 | 0.00000 |
| HETATM | 347 | Pt | 10.25566 | 12.96529 | 24.06734 | Pt | 0 | 0 | 0.00000 |
| HETATM | 348 | Pt | 10.25930 | 21.33459 | 24.07807 | Pt | 0 | 0 | 0.00000 |
| HETATM | 349 | Pt | 17.50747 | 33.89874 | 24.07958 | Pt | 0 | 0 | 0.00000 |
| HETATM | 350 | Pt | 17.50804 | 17.15102 | 24.07022 | Pt | 0 | 0 | 0.00000 |
| HETATM | 351 | Pt | 17.50976 | 25.52457 | 24.07451 | Pt | 0 | 0 | 0.00000 |
| HETATM | 352 | Pt | 5.42317  | 21.33516 | 24.07723 | Pt | 0 | 0 | 0.00000 |
| HETATM | 353 | Pt | 5.42195  | 4.58890  | 24.07749 | Pt | 0 | 0 | 0.00000 |
| HETATM | 354 | Pt | 5.42490  | 12.96297 | 24.07667 | Pt | 0 | 0 | 0.00000 |
| HETATM | 355 | Pt | 12.67580 | 25.52328 | 24.07721 | Pt | 0 | 0 | 0.00000 |
| HETATM | 356 | Pt | 12.67355 | 8.77424  | 24.06416 | Pt | 0 | 0 | 0.00000 |
| HETATM | 357 | Pt | 12.67587 | 17.14893 | 24.06545 | Pt | 0 | 0 | 0.00000 |
| HETATM | 358 | Pt | 19.92648 | 29.71094 | 24.07552 | Pt | 0 | 0 | 0.00000 |
| HETATM | 359 | Pt | 19.92454 | 12.96502 | 24.07592 | Pt | 0 | 0 | 0.00000 |
| HETATM | 360 | Pt | 19.92782 | 21.33778 | 24.07265 | Pt | 0 | 0 | 0.00000 |
| HETATM | 361 | Pt | 5.42236  | 24.12625 | 24.07152 | Pt | 0 | 0 | 0.00000 |
| HETATM | 362 | Pt | 5.42390  | 7.38132  | 24.07038 | Pt | 0 | 0 | 0.00000 |
| HETATM | 363 | Pt | 5.42454  | 15.75283 | 24.07028 | Pt | 0 | 0 | 0.00000 |
| HETATM | 364 | Pt | 12.67542 | 28.31557 | 24.07038 | Pt | 0 | 0 | 0.00000 |
| HETATM | 365 | Pt | 12.67598 | 11.56896 | 24.05281 | Pt | 0 | 0 | 0.00000 |
| HETATM | 366 | Pt | 12.67623 | 19.94099 | 24.06710 | Pt | 0 | 0 | 0.00000 |
| HETATM | 367 | Pt | 19.92504 | 32.50188 | 24.07028 | Pt | 0 | 0 | 0.00000 |
| HETATM | 368 | Pt | 19.92625 | 15.75520 | 24.06710 | Pt | 0 | 0 | 0.00000 |
| HETATM | 369 | Pt | 19.92737 | 24.12874 | 24.06768 | Pt | 0 | 0 | 0.00000 |
| HETATM | 370 | Pt | 5.42186  | 26.91798 | 24.07753 | Pt | 0 | 0 | 0.00000 |
| HETATM | 371 | Pt | 5.42499  | 10.17316 | 24.07620 | Pt | 0 | 0 | 0.00000 |
| HETATM | 372 | Pt | 5.42379  | 18.54422 | 24.07642 | Pt | 0 | 0 | 0.00000 |

|        |     |    |          |          |          |    |   |   |         |
|--------|-----|----|----------|----------|----------|----|---|---|---------|
| HETATM | 373 | Pt | 12.67583 | 31.10798 | 24.07618 | Pt | 0 | 0 | 0.00000 |
| HETATM | 374 | Pt | 12.67360 | 14.35584 | 24.06219 | Pt | 0 | 0 | 0.00000 |
| HETATM | 375 | Pt | 12.67638 | 22.73147 | 24.07686 | Pt | 0 | 0 | 0.00000 |
| HETATM | 376 | Pt | 19.92528 | 35.29323 | 24.07543 | Pt | 0 | 0 | 0.00000 |
| HETATM | 377 | Pt | 19.92629 | 18.54623 | 24.07308 | Pt | 0 | 0 | 0.00000 |
| HETATM | 378 | Pt | 19.92703 | 26.91978 | 24.07481 | Pt | 0 | 0 | 0.00000 |
| HETATM | 379 | Pt | 7.84087  | 22.73038 | 24.07758 | Pt | 0 | 0 | 0.00000 |
| HETATM | 380 | Pt | 7.83949  | 5.98375  | 24.07521 | Pt | 0 | 0 | 0.00000 |
| HETATM | 381 | Pt | 7.84304  | 14.35758 | 24.07958 | Pt | 0 | 0 | 0.00000 |
| HETATM | 382 | Pt | 15.09251 | 26.92024 | 24.07538 | Pt | 0 | 0 | 0.00000 |
| HETATM | 383 | Pt | 15.09540 | 10.17106 | 24.06733 | Pt | 0 | 0 | 0.00000 |
| HETATM | 384 | Pt | 15.09416 | 18.54468 | 24.07022 | Pt | 0 | 0 | 0.00000 |
| HETATM | 385 | Pt | 0.58794  | 18.54543 | 24.07644 | Pt | 0 | 0 | 0.00000 |
| HETATM | 386 | Pt | 0.58625  | 1.79841  | 24.07807 | Pt | 0 | 0 | 0.00000 |
| HETATM | 387 | Pt | 0.58964  | 10.17248 | 24.07451 | Pt | 0 | 0 | 0.00000 |
| HETATM | 388 | Pt | 7.84033  | 25.52168 | 24.07753 | Pt | 0 | 0 | 0.00000 |
| HETATM | 389 | Pt | 7.84199  | 8.77788  | 24.07618 | Pt | 0 | 0 | 0.00000 |
| HETATM | 390 | Pt | 7.84180  | 17.14871 | 24.07543 | Pt | 0 | 0 | 0.00000 |
| HETATM | 391 | Pt | 15.09268 | 29.71244 | 24.07620 | Pt | 0 | 0 | 0.00000 |
| HETATM | 392 | Pt | 15.09068 | 12.96034 | 24.06219 | Pt | 0 | 0 | 0.00000 |
| HETATM | 393 | Pt | 15.09332 | 21.33655 | 24.07308 | Pt | 0 | 0 | 0.00000 |
| HETATM | 394 | Pt | 0.58748  | 21.33647 | 24.07642 | Pt | 0 | 0 | 0.00000 |
| HETATM | 395 | Pt | 0.58745  | 4.59010  | 24.07686 | Pt | 0 | 0 | 0.00000 |
| HETATM | 396 | Pt | 0.58930  | 12.96350 | 24.07481 | Pt | 0 | 0 | 0.00000 |
| HETATM | 397 | Pt | 7.83974  | 28.31326 | 24.07093 | Pt | 0 | 0 | 0.00000 |
| HETATM | 398 | Pt | 7.84334  | 11.56906 | 24.07318 | Pt | 0 | 0 | 0.00000 |
| HETATM | 399 | Pt | 7.84140  | 19.93950 | 24.06981 | Pt | 0 | 0 | 0.00000 |
| HETATM | 400 | Pt | 15.09239 | 32.50474 | 24.07318 | Pt | 0 | 0 | 0.00000 |
| HETATM | 401 | Pt | 15.09315 | 15.75563 | 24.05648 | Pt | 0 | 0 | 0.00000 |
| HETATM | 402 | Pt | 15.09272 | 24.12863 | 24.06836 | Pt | 0 | 0 | 0.00000 |
| HETATM | 403 | Pt | 0.58701  | 24.12782 | 24.06981 | Pt | 0 | 0 | 0.00000 |
| HETATM | 404 | Pt | 0.58926  | 7.38130  | 24.06836 | Pt | 0 | 0 | 0.00000 |
| HETATM | 405 | Pt | 0.58889  | 15.75443 | 24.06892 | Pt | 0 | 0 | 0.00000 |
| HETATM | 406 | Pt | 3.80589  | 21.32644 | 26.35410 | Pt | 0 | 0 | 0.00000 |
| HETATM | 407 | Pt | 3.80372  | 4.58131  | 26.35543 | Pt | 0 | 0 | 0.00000 |
| HETATM | 408 | Pt | 3.80995  | 12.95423 | 26.35200 | Pt | 0 | 0 | 0.00000 |
| HETATM | 409 | Pt | 11.06063 | 25.51245 | 26.35543 | Pt | 0 | 0 | 0.00000 |
| HETATM | 410 | Pt | 11.05886 | 8.76803  | 26.33988 | Pt | 0 | 0 | 0.00000 |
| HETATM | 411 | Pt | 11.07362 | 17.13285 | 26.35184 | Pt | 0 | 0 | 0.00000 |
| HETATM | 412 | Pt | 18.30867 | 29.70431 | 26.35199 | Pt | 0 | 0 | 0.00000 |
| HETATM | 413 | Pt | 18.29563 | 12.96322 | 26.35184 | Pt | 0 | 0 | 0.00000 |
| HETATM | 414 | Pt | 18.31151 | 21.32999 | 26.34767 | Pt | 0 | 0 | 0.00000 |
| HETATM | 415 | Pt | 3.81867  | 24.12703 | 26.35551 | Pt | 0 | 0 | 0.00000 |
| HETATM | 416 | Pt | 3.82164  | 7.38184  | 26.35381 | Pt | 0 | 0 | 0.00000 |
| HETATM | 417 | Pt | 3.82416  | 15.75305 | 26.35415 | Pt | 0 | 0 | 0.00000 |
| HETATM | 418 | Pt | 11.07430 | 28.31426 | 26.35431 | Pt | 0 | 0 | 0.00000 |
| HETATM | 419 | Pt | 11.07408 | 11.56571 | 26.31964 | Pt | 0 | 0 | 0.00000 |
| HETATM | 420 | Pt | 11.07967 | 19.93409 | 26.35706 | Pt | 0 | 0 | 0.00000 |
| HETATM | 421 | Pt | 18.32077 | 32.50644 | 26.35527 | Pt | 0 | 0 | 0.00000 |
| HETATM | 422 | Pt | 18.31757 | 15.75347 | 26.34037 | Pt | 0 | 0 | 0.00000 |
| HETATM | 423 | Pt | 18.32609 | 24.12885 | 26.35064 | Pt | 0 | 0 | 0.00000 |
| HETATM | 424 | Pt | 3.80319  | 26.92749 | 26.35497 | Pt | 0 | 0 | 0.00000 |
| HETATM | 425 | Pt | 3.80897  | 10.18188 | 26.35147 | Pt | 0 | 0 | 0.00000 |
| HETATM | 426 | Pt | 3.80815  | 18.55260 | 26.35412 | Pt | 0 | 0 | 0.00000 |
| HETATM | 427 | Pt | 11.05834 | 31.11434 | 26.34809 | Pt | 0 | 0 | 0.00000 |
| HETATM | 428 | Pt | 11.05958 | 14.37144 | 26.34289 | Pt | 0 | 0 | 0.00000 |
| HETATM | 429 | Pt | 11.06299 | 22.73433 | 26.35668 | Pt | 0 | 0 | 0.00000 |
| HETATM | 430 | Pt | 18.30651 | 35.30490 | 26.35496 | Pt | 0 | 0 | 0.00000 |
| HETATM | 431 | Pt | 18.30425 | 18.55580 | 26.34581 | Pt | 0 | 0 | 0.00000 |
| HETATM | 432 | Pt | 18.31045 | 26.92918 | 26.35192 | Pt | 0 | 0 | 0.00000 |
| HETATM | 433 | Pt | 6.22489  | 22.73780 | 26.35551 | Pt | 0 | 0 | 0.00000 |
| HETATM | 434 | Pt | 6.22332  | 5.99406  | 26.35431 | Pt | 0 | 0 | 0.00000 |
| HETATM | 435 | Pt | 6.23062  | 14.36577 | 26.35527 | Pt | 0 | 0 | 0.00000 |

|        |     |    |          |          |          |    |   |   |         |
|--------|-----|----|----------|----------|----------|----|---|---|---------|
| HETATM | 436 | Pt | 13.47700 | 26.92824 | 26.35381 | Pt | 0 | 0 | 0.00000 |
| HETATM | 437 | Pt | 13.47412 | 10.18005 | 26.31964 | Pt | 0 | 0 | 0.00000 |
| HETATM | 438 | Pt | 13.47908 | 18.54697 | 26.34037 | Pt | 0 | 0 | 0.00000 |
| HETATM | 439 | Pt | 20.72542 | 31.11602 | 26.35415 | Pt | 0 | 0 | 0.00000 |
| HETATM | 440 | Pt | 20.71855 | 14.36908 | 26.35706 | Pt | 0 | 0 | 0.00000 |
| HETATM | 441 | Pt | 20.72811 | 22.74204 | 26.35064 | Pt | 0 | 0 | 0.00000 |
| HETATM | 442 | Pt | 6.22290  | 25.51282 | 26.35455 | Pt | 0 | 0 | 0.00000 |
| HETATM | 443 | Pt | 6.22845  | 8.76965  | 26.35251 | Pt | 0 | 0 | 0.00000 |
| HETATM | 444 | Pt | 6.22747  | 17.13839 | 26.35243 | Pt | 0 | 0 | 0.00000 |
| HETATM | 445 | Pt | 13.47547 | 29.70650 | 26.35251 | Pt | 0 | 0 | 0.00000 |
| HETATM | 446 | Pt | 13.48009 | 12.96172 | 26.34572 | Pt | 0 | 0 | 0.00000 |
| HETATM | 447 | Pt | 13.48124 | 21.32303 | 26.35316 | Pt | 0 | 0 | 0.00000 |
| HETATM | 448 | Pt | 20.72350 | 33.89002 | 26.35243 | Pt | 0 | 0 | 0.00000 |
| HETATM | 449 | Pt | 20.72062 | 17.14337 | 26.35316 | Pt | 0 | 0 | 0.00000 |
| HETATM | 450 | Pt | 20.72831 | 25.51601 | 26.35146 | Pt | 0 | 0 | 0.00000 |
| HETATM | 451 | Pt | 6.23698  | 28.31375 | 26.35462 | Pt | 0 | 0 | 0.00000 |
| HETATM | 452 | Pt | 6.24397  | 11.56852 | 26.35605 | Pt | 0 | 0 | 0.00000 |
| HETATM | 453 | Pt | 6.24118  | 19.93825 | 26.35443 | Pt | 0 | 0 | 0.00000 |
| HETATM | 454 | Pt | 13.49274 | 32.51451 | 26.35736 | Pt | 0 | 0 | 0.00000 |
| HETATM | 455 | Pt | 13.49079 | 15.73886 | 26.32726 | Pt | 0 | 0 | 0.00000 |
| HETATM | 456 | Pt | 13.49329 | 24.12461 | 26.35427 | Pt | 0 | 0 | 0.00000 |
| HETATM | 457 | Pt | 20.73598 | 36.69265 | 26.35028 | Pt | 0 | 0 | 0.00000 |
| HETATM | 458 | Pt | 20.74157 | 19.94159 | 26.34924 | Pt | 0 | 0 | 0.00000 |
| HETATM | 459 | Pt | 20.74245 | 28.31618 | 26.35211 | Pt | 0 | 0 | 0.00000 |
| HETATM | 460 | Pt | 8.65790  | 24.12463 | 26.35497 | Pt | 0 | 0 | 0.00000 |
| HETATM | 461 | Pt | 8.65624  | 7.38027  | 26.34809 | Pt | 0 | 0 | 0.00000 |
| HETATM | 462 | Pt | 8.66129  | 15.75265 | 26.35496 | Pt | 0 | 0 | 0.00000 |
| HETATM | 463 | Pt | 15.90824 | 28.31728 | 26.35147 | Pt | 0 | 0 | 0.00000 |
| HETATM | 464 | Pt | 15.91120 | 11.57035 | 26.34289 | Pt | 0 | 0 | 0.00000 |
| HETATM | 465 | Pt | 15.91263 | 19.93660 | 26.34581 | Pt | 0 | 0 | 0.00000 |
| HETATM | 466 | Pt | 1.40255  | 19.94148 | 26.35412 | Pt | 0 | 0 | 0.00000 |
| HETATM | 467 | Pt | 1.39662  | 3.19429  | 26.35668 | Pt | 0 | 0 | 0.00000 |
| HETATM | 468 | Pt | 1.40574  | 11.56820 | 26.35192 | Pt | 0 | 0 | 0.00000 |
| HETATM | 469 | Pt | 8.64154  | 26.92548 | 26.35462 | Pt | 0 | 0 | 0.00000 |
| HETATM | 470 | Pt | 8.65162  | 10.18860 | 26.35736 | Pt | 0 | 0 | 0.00000 |
| HETATM | 471 | Pt | 8.64838  | 18.55050 | 26.35028 | Pt | 0 | 0 | 0.00000 |
| HETATM | 472 | Pt | 15.89160 | 31.11938 | 26.35605 | Pt | 0 | 0 | 0.00000 |
| HETATM | 473 | Pt | 15.87981 | 14.35955 | 26.32726 | Pt | 0 | 0 | 0.00000 |
| HETATM | 474 | Pt | 15.89410 | 22.74028 | 26.34924 | Pt | 0 | 0 | 0.00000 |
| HETATM | 475 | Pt | 1.38604  | 22.74137 | 26.35443 | Pt | 0 | 0 | 0.00000 |
| HETATM | 476 | Pt | 1.38547  | 5.99413  | 26.35427 | Pt | 0 | 0 | 0.00000 |
| HETATM | 477 | Pt | 1.39092  | 14.36788 | 26.35211 | Pt | 0 | 0 | 0.00000 |
| HETATM | 478 | Pt | 8.64126  | 29.70154 | 26.35416 | Pt | 0 | 0 | 0.00000 |
| HETATM | 479 | Pt | 8.65339  | 12.95228 | 26.36784 | Pt | 0 | 0 | 0.00000 |
| HETATM | 480 | Pt | 8.64422  | 21.32355 | 26.35450 | Pt | 0 | 0 | 0.00000 |
| HETATM | 481 | Pt | 15.88527 | 33.89787 | 26.36783 | Pt | 0 | 0 | 0.00000 |
| HETATM | 482 | Pt | 15.89098 | 17.13751 | 26.35466 | Pt | 0 | 0 | 0.00000 |
| HETATM | 483 | Pt | 15.89375 | 25.51574 | 26.35204 | Pt | 0 | 0 | 0.00000 |
| HETATM | 484 | Pt | 1.38422  | 25.51510 | 26.35450 | Pt | 0 | 0 | 0.00000 |
| HETATM | 485 | Pt | 1.39001  | 8.76856  | 26.35204 | Pt | 0 | 0 | 0.00000 |
| HETATM | 486 | Pt | 1.38958  | 17.14125 | 26.35300 | Pt | 0 | 0 | 0.00000 |
| HETATM | 487 | Pt | 2.19976  | 1.81633  | 28.71209 | Pt | 0 | 0 | 0.00000 |
| HETATM | 488 | Pt | 2.21312  | 10.18776 | 28.71315 | Pt | 0 | 0 | 0.00000 |
| HETATM | 489 | Pt | 2.21026  | 18.56272 | 28.71165 | Pt | 0 | 0 | 0.00000 |
| HETATM | 490 | Pt | 9.46249  | 6.00304  | 28.71455 | Pt | 0 | 0 | 0.00000 |
| HETATM | 491 | Pt | 9.47180  | 14.37780 | 28.73208 | Pt | 0 | 0 | 0.00000 |
| HETATM | 492 | Pt | 9.46807  | 22.74089 | 28.71209 | Pt | 0 | 0 | 0.00000 |
| HETATM | 493 | Pt | 16.71060 | 10.19848 | 28.73208 | Pt | 0 | 0 | 0.00000 |
| HETATM | 494 | Pt | 16.70643 | 18.54991 | 28.74313 | Pt | 0 | 0 | 0.00000 |
| HETATM | 495 | Pt | 16.71126 | 26.93818 | 28.71315 | Pt | 0 | 0 | 0.00000 |
| HETATM | 496 | Pt | 2.20668  | 21.32232 | 28.71675 | Pt | 0 | 0 | 0.00000 |
| HETATM | 497 | Pt | 2.20103  | 4.57381  | 28.71267 | Pt | 0 | 0 | 0.00000 |
| HETATM | 498 | Pt | 2.21603  | 12.94774 | 28.71119 | Pt | 0 | 0 | 0.00000 |



|        |     |    |          |          |          |    |   |   |         |
|--------|-----|----|----------|----------|----------|----|---|---|---------|
| HETATM | 499 | Pt | 9.46482  | 25.50242 | 28.71710 | Pt | 0 | 0 | 0.00000 |
| HETATM | 500 | Pt | 9.47628  | 8.76510  | 28.68519 | Pt | 0 | 0 | 0.00000 |
| HETATM | 501 | Pt | 9.50782  | 17.12862 | 28.69686 | Pt | 0 | 0 | 0.00000 |
| HETATM | 502 | Pt | 16.70809 | 29.70082 | 28.71607 | Pt | 0 | 0 | 0.00000 |
| HETATM | 503 | Pt | 16.62544 | 12.94141 | 28.73150 | Pt | 0 | 0 | 0.00000 |
| HETATM | 504 | Pt | 16.70626 | 21.30990 | 28.70062 | Pt | 0 | 0 | 0.00000 |
| HETATM | 505 | Pt | 2.17241  | 24.13001 | 28.71920 | Pt | 0 | 0 | 0.00000 |
| HETATM | 506 | Pt | 2.17625  | 7.37819  | 28.71443 | Pt | 0 | 0 | 0.00000 |
| HETATM | 507 | Pt | 2.18520  | 15.75505 | 28.71566 | Pt | 0 | 0 | 0.00000 |
| HETATM | 508 | Pt | 9.43359  | 28.31314 | 28.71356 | Pt | 0 | 0 | 0.00000 |
| HETATM | 509 | Pt | 9.49185  | 11.57224 | 28.78325 | Pt | 0 | 0 | 0.00000 |
| HETATM | 510 | Pt | 9.44589  | 19.93472 | 28.71683 | Pt | 0 | 0 | 0.00000 |
| HETATM | 511 | Pt | 16.66587 | 32.51812 | 28.71993 | Pt | 0 | 0 | 0.00000 |
| HETATM | 512 | Pt | 16.62093 | 15.65735 | 28.68541 | Pt | 0 | 0 | 0.00000 |
| HETATM | 513 | Pt | 16.68529 | 24.12341 | 28.70950 | Pt | 0 | 0 | 0.00000 |
| HETATM | 514 | Pt | 4.59294  | 3.19428  | 28.71710 | Pt | 0 | 0 | 0.00000 |
| HETATM | 515 | Pt | 4.60723  | 11.56634 | 28.71607 | Pt | 0 | 0 | 0.00000 |
| HETATM | 516 | Pt | 4.60193  | 19.93942 | 28.71675 | Pt | 0 | 0 | 0.00000 |
| HETATM | 517 | Pt | 11.84761 | 7.39601  | 28.68519 | Pt | 0 | 0 | 0.00000 |
| HETATM | 518 | Pt | 11.88983 | 15.67551 | 28.73151 | Pt | 0 | 0 | 0.00000 |
| HETATM | 519 | Pt | 11.85548 | 24.12073 | 28.71267 | Pt | 0 | 0 | 0.00000 |
| HETATM | 520 | Pt | 19.07487 | 11.60508 | 28.69686 | Pt | 0 | 0 | 0.00000 |
| HETATM | 521 | Pt | 19.09674 | 19.92976 | 28.70062 | Pt | 0 | 0 | 0.00000 |
| HETATM | 522 | Pt | 19.10002 | 28.32068 | 28.71119 | Pt | 0 | 0 | 0.00000 |
| HETATM | 523 | Pt | 4.62603  | 22.74695 | 28.71234 | Pt | 0 | 0 | 0.00000 |
| HETATM | 524 | Pt | 4.62581  | 6.00455  | 28.71720 | Pt | 0 | 0 | 0.00000 |
| HETATM | 525 | Pt | 4.64220  | 14.37151 | 28.71082 | Pt | 0 | 0 | 0.00000 |
| HETATM | 526 | Pt | 11.88214 | 26.93602 | 28.71720 | Pt | 0 | 0 | 0.00000 |
| HETATM | 527 | Pt | 11.85887 | 10.15369 | 28.57323 | Pt | 0 | 0 | 0.00000 |
| HETATM | 528 | Pt | 11.89202 | 18.54062 | 28.72190 | Pt | 0 | 0 | 0.00000 |
| HETATM | 529 | Pt | 19.11995 | 31.13370 | 28.71082 | Pt | 0 | 0 | 0.00000 |
| HETATM | 530 | Pt | 19.10560 | 14.37586 | 28.72190 | Pt | 0 | 0 | 0.00000 |
| HETATM | 531 | Pt | 19.12911 | 22.74611 | 28.71396 | Pt | 0 | 0 | 0.00000 |
| HETATM | 532 | Pt | 4.62397  | 25.50650 | 28.71594 | Pt | 0 | 0 | 0.00000 |
| HETATM | 533 | Pt | 4.63517  | 8.76529  | 28.70851 | Pt | 0 | 0 | 0.00000 |
| HETATM | 534 | Pt | 4.63558  | 17.13110 | 28.71593 | Pt | 0 | 0 | 0.00000 |
| HETATM | 535 | Pt | 11.87763 | 29.69857 | 28.71617 | Pt | 0 | 0 | 0.00000 |
| HETATM | 536 | Pt | 11.91238 | 12.97931 | 28.66264 | Pt | 0 | 0 | 0.00000 |
| HETATM | 537 | Pt | 11.89772 | 21.30245 | 28.72194 | Pt | 0 | 0 | 0.00000 |
| HETATM | 538 | Pt | 19.12346 | 33.89574 | 28.72006 | Pt | 0 | 0 | 0.00000 |
| HETATM | 539 | Pt | 19.07319 | 17.11167 | 28.68462 | Pt | 0 | 0 | 0.00000 |
| HETATM | 540 | Pt | 19.13000 | 25.50790 | 28.71244 | Pt | 0 | 0 | 0.00000 |
| HETATM | 541 | Pt | 7.04271  | 4.57260  | 28.71356 | Pt | 0 | 0 | 0.00000 |
| HETATM | 542 | Pt | 7.06819  | 12.93842 | 28.71993 | Pt | 0 | 0 | 0.00000 |
| HETATM | 543 | Pt | 7.05060  | 21.31358 | 28.71920 | Pt | 0 | 0 | 0.00000 |
| HETATM | 544 | Pt | 14.27089 | 8.81306  | 28.78325 | Pt | 0 | 0 | 0.00000 |
| HETATM | 545 | Pt | 14.24416 | 17.02958 | 28.68541 | Pt | 0 | 0 | 0.00000 |
| HETATM | 546 | Pt | 14.29653 | 25.50146 | 28.71443 | Pt | 0 | 0 | 0.00000 |
| HETATM | 547 | Pt | 21.53599 | 12.95450 | 28.71683 | Pt | 0 | 0 | 0.00000 |
| HETATM | 548 | Pt | 21.54380 | 21.31835 | 28.70950 | Pt | 0 | 0 | 0.00000 |
| HETATM | 549 | Pt | 21.54663 | 29.69764 | 28.71566 | Pt | 0 | 0 | 0.00000 |
| HETATM | 550 | Pt | 7.01689  | 24.12494 | 28.71594 | Pt | 0 | 0 | 0.00000 |
| HETATM | 551 | Pt | 7.02050  | 7.38192  | 28.71617 | Pt | 0 | 0 | 0.00000 |
| HETATM | 552 | Pt | 7.03245  | 15.75557 | 28.72006 | Pt | 0 | 0 | 0.00000 |
| HETATM | 553 | Pt | 14.26833 | 28.32450 | 28.70851 | Pt | 0 | 0 | 0.00000 |
| HETATM | 554 | Pt | 14.27918 | 11.61284 | 28.66264 | Pt | 0 | 0 | 0.00000 |
| HETATM | 555 | Pt | 14.27750 | 19.88046 | 28.68462 | Pt | 0 | 0 | 0.00000 |
| HETATM | 556 | Pt | 21.51314 | 32.50775 | 28.71593 | Pt | 0 | 0 | 0.00000 |
| HETATM | 557 | Pt | 21.49456 | 15.76172 | 28.72194 | Pt | 0 | 0 | 0.00000 |
| HETATM | 558 | Pt | 21.52045 | 24.12778 | 28.71244 | Pt | 0 | 0 | 0.00000 |
| HETATM | 559 | Pt | 7.04319  | 26.93360 | 28.71405 | Pt | 0 | 0 | 0.00000 |
| HETATM | 560 | Pt | 7.07394  | 10.19301 | 28.71352 | Pt | 0 | 0 | 0.00000 |
| HETATM | 561 | Pt | 7.06081  | 18.55273 | 28.70629 | Pt | 0 | 0 | 0.00000 |

|        |     |    |          |          |          |    |   |   |         |
|--------|-----|----|----------|----------|----------|----|---|---|---------|
| HETATM | 562 | Pt | 14.28539 | 31.15040 | 28.71352 | Pt | 0 | 0 | 0.00000 |
| HETATM | 563 | Pt | 14.25350 | 14.30130 | 29.84824 | Pt | 0 | 0 | 0.00000 |
| HETATM | 564 | Pt | 14.30061 | 22.73280 | 28.72059 | Pt | 0 | 0 | 0.00000 |
| HETATM | 565 | Pt | 21.53169 | 35.31889 | 28.70629 | Pt | 0 | 0 | 0.00000 |
| HETATM | 566 | Pt | 21.53183 | 18.55785 | 28.72059 | Pt | 0 | 0 | 0.00000 |
| HETATM | 567 | Pt | 21.54893 | 26.93735 | 28.71172 | Pt | 0 | 0 | 0.00000 |
| HETATM | 568 | O  | 3.00444  | 19.93827 | 29.83582 | O  | 0 | 0 | 0.00000 |
| HETATM | 569 | O  | 2.99414  | 3.19522  | 29.83514 | O  | 0 | 0 | 0.00000 |
| HETATM | 570 | O  | 3.00924  | 11.56920 | 29.83437 | O  | 0 | 0 | 0.00000 |
| HETATM | 571 | O  | 10.26503 | 24.11828 | 29.83514 | O  | 0 | 0 | 0.00000 |
| HETATM | 572 | O  | 10.27271 | 7.40638  | 29.81732 | O  | 0 | 0 | 0.00000 |
| HETATM | 573 | O  | 10.29980 | 15.76060 | 29.83373 | O  | 0 | 0 | 0.00000 |
| HETATM | 574 | O  | 17.50956 | 28.31835 | 29.83437 | O  | 0 | 0 | 0.00000 |
| HETATM | 575 | O  | 17.49414 | 11.60695 | 29.83373 | O  | 0 | 0 | 0.00000 |
| HETATM | 576 | O  | 17.51276 | 19.94651 | 29.83403 | O  | 0 | 0 | 0.00000 |
| HETATM | 577 | O  | 5.42089  | 24.12370 | 29.83581 | O  | 0 | 0 | 0.00000 |
| HETATM | 578 | O  | 5.42546  | 7.38849  | 29.83508 | O  | 0 | 0 | 0.00000 |
| HETATM | 579 | O  | 5.43166  | 15.74794 | 29.83635 | O  | 0 | 0 | 0.00000 |
| HETATM | 580 | O  | 12.68085 | 28.32051 | 29.83508 | O  | 0 | 0 | 0.00000 |
| HETATM | 581 | O  | 13.23817 | 12.54270 | 29.99157 | O  | 0 | 0 | 0.00000 |
| HETATM | 582 | O  | 12.70434 | 19.90081 | 29.83056 | O  | 0 | 0 | 0.00000 |
| HETATM | 583 | O  | 19.91724 | 32.50561 | 29.83634 | O  | 0 | 0 | 0.00000 |
| HETATM | 584 | O  | 19.87740 | 15.75945 | 29.83056 | O  | 0 | 0 | 0.00000 |
| HETATM | 585 | O  | 19.92730 | 24.12861 | 29.83389 | O  | 0 | 0 | 0.00000 |
| HETATM | 586 | O  | 7.84006  | 28.31381 | 29.83498 | O  | 0 | 0 | 0.00000 |
| HETATM | 587 | O  | 7.82429  | 11.56159 | 29.85642 | O  | 0 | 0 | 0.00000 |
| HETATM | 588 | O  | 7.85185  | 19.92533 | 29.83507 | O  | 0 | 0 | 0.00000 |
| HETATM | 589 | O  | 15.09545 | 32.48451 | 29.85642 | O  | 0 | 0 | 0.00000 |
| HETATM | 590 | O  | 15.27150 | 16.06453 | 30.00104 | O  | 0 | 0 | 0.00000 |
| HETATM | 591 | O  | 15.09831 | 24.12480 | 29.83524 | O  | 0 | 0 | 0.00000 |
| HETATM | 592 | O  | 0.56953  | 24.12979 | 29.83507 | O  | 0 | 0 | 0.00000 |
| HETATM | 593 | O  | 0.58313  | 7.38422  | 29.83524 | O  | 0 | 0 | 0.00000 |
| HETATM | 594 | O  | 0.58867  | 15.75403 | 29.83516 | O  | 0 | 0 | 0.00000 |

UNIT ENERGY kcal  
ENERGY -75147.422548  
END

XTLGRF 200

DESCRP TS

REMARK Pt111\_0.33ML\_9x9x7\_30.0\_vac fcc-displacement

FIXATOMS 1 162

CRYSTX 25.12092 25.12092 43.67409 90.00000 90.00000 60.00000

FORMAT ATOM (a6,1x,i5,1x,a5,1x,a3,1x,a1,1x,a5,3f10.5,1x,a5,i3,i2,1x,f8.5)

|        |    |    |          |          |          |    |   |   |         |
|--------|----|----|----------|----------|----------|----|---|---|---------|
| HETATM | 1  | Pt | 2.20033  | 1.79823  | 14.95718 | Pt | 0 | 0 | 0.00000 |
| HETATM | 2  | Pt | 2.20033  | 10.17187 | 14.95718 | Pt | 0 | 0 | 0.00000 |
| HETATM | 3  | Pt | 2.20033  | 18.54551 | 14.95718 | Pt | 0 | 0 | 0.00000 |
| HETATM | 4  | Pt | 9.45211  | 5.98505  | 14.95718 | Pt | 0 | 0 | 0.00000 |
| HETATM | 5  | Pt | 9.45211  | 14.35869 | 14.95718 | Pt | 0 | 0 | 0.00000 |
| HETATM | 6  | Pt | 9.45211  | 22.73233 | 14.95718 | Pt | 0 | 0 | 0.00000 |
| HETATM | 7  | Pt | 16.70390 | 10.17187 | 14.95718 | Pt | 0 | 0 | 0.00000 |
| HETATM | 8  | Pt | 16.70390 | 18.54551 | 14.95718 | Pt | 0 | 0 | 0.00000 |
| HETATM | 9  | Pt | 16.70390 | 26.91915 | 14.95718 | Pt | 0 | 0 | 0.00000 |
| HETATM | 10 | Pt | 2.20033  | 21.33672 | 14.95718 | Pt | 0 | 0 | 0.00000 |
| HETATM | 11 | Pt | 2.20033  | 4.58944  | 14.95718 | Pt | 0 | 0 | 0.00000 |
| HETATM | 12 | Pt | 2.20033  | 12.96308 | 14.95718 | Pt | 0 | 0 | 0.00000 |
| HETATM | 13 | Pt | 9.45211  | 25.52354 | 14.95718 | Pt | 0 | 0 | 0.00000 |
| HETATM | 14 | Pt | 9.45211  | 8.77626  | 14.95718 | Pt | 0 | 0 | 0.00000 |
| HETATM | 15 | Pt | 9.45211  | 17.14990 | 14.95718 | Pt | 0 | 0 | 0.00000 |
| HETATM | 16 | Pt | 16.70390 | 29.71036 | 14.95718 | Pt | 0 | 0 | 0.00000 |
| HETATM | 17 | Pt | 16.70390 | 12.96308 | 14.95718 | Pt | 0 | 0 | 0.00000 |
| HETATM | 18 | Pt | 16.70390 | 21.33672 | 14.95718 | Pt | 0 | 0 | 0.00000 |
| HETATM | 19 | Pt | 2.20033  | 24.12793 | 14.95718 | Pt | 0 | 0 | 0.00000 |
| HETATM | 20 | Pt | 2.20033  | 7.38065  | 14.95718 | Pt | 0 | 0 | 0.00000 |

|        |    |    |          |          |          |    |   |   |         |
|--------|----|----|----------|----------|----------|----|---|---|---------|
| HETATM | 21 | Pt | 2.20033  | 15.75429 | 14.95718 | Pt | 0 | 0 | 0.00000 |
| HETATM | 22 | Pt | 9.45211  | 28.31475 | 14.95718 | Pt | 0 | 0 | 0.00000 |
| HETATM | 23 | Pt | 9.45211  | 11.56747 | 14.95718 | Pt | 0 | 0 | 0.00000 |
| HETATM | 24 | Pt | 9.45211  | 19.94111 | 14.95718 | Pt | 0 | 0 | 0.00000 |
| HETATM | 25 | Pt | 16.70390 | 32.50157 | 14.95718 | Pt | 0 | 0 | 0.00000 |
| HETATM | 26 | Pt | 16.70390 | 15.75429 | 14.95718 | Pt | 0 | 0 | 0.00000 |
| HETATM | 27 | Pt | 16.70390 | 24.12793 | 14.95718 | Pt | 0 | 0 | 0.00000 |
| HETATM | 28 | Pt | 4.61759  | 3.19384  | 14.95718 | Pt | 0 | 0 | 0.00000 |
| HETATM | 29 | Pt | 4.61759  | 11.56748 | 14.95718 | Pt | 0 | 0 | 0.00000 |
| HETATM | 30 | Pt | 4.61759  | 19.94112 | 14.95718 | Pt | 0 | 0 | 0.00000 |
| HETATM | 31 | Pt | 11.86937 | 7.38066  | 14.95718 | Pt | 0 | 0 | 0.00000 |
| HETATM | 32 | Pt | 11.86937 | 15.75430 | 14.95718 | Pt | 0 | 0 | 0.00000 |
| HETATM | 33 | Pt | 11.86937 | 24.12794 | 14.95718 | Pt | 0 | 0 | 0.00000 |
| HETATM | 34 | Pt | 19.12116 | 11.56748 | 14.95718 | Pt | 0 | 0 | 0.00000 |
| HETATM | 35 | Pt | 19.12116 | 19.94112 | 14.95718 | Pt | 0 | 0 | 0.00000 |
| HETATM | 36 | Pt | 19.12116 | 28.31476 | 14.95718 | Pt | 0 | 0 | 0.00000 |
| HETATM | 37 | Pt | 4.61759  | 22.73233 | 14.95718 | Pt | 0 | 0 | 0.00000 |
| HETATM | 38 | Pt | 4.61759  | 5.98505  | 14.95718 | Pt | 0 | 0 | 0.00000 |
| HETATM | 39 | Pt | 4.61759  | 14.35869 | 14.95718 | Pt | 0 | 0 | 0.00000 |
| HETATM | 40 | Pt | 11.86937 | 26.91915 | 14.95718 | Pt | 0 | 0 | 0.00000 |
| HETATM | 41 | Pt | 11.86937 | 10.17187 | 14.95718 | Pt | 0 | 0 | 0.00000 |
| HETATM | 42 | Pt | 11.86937 | 18.54551 | 14.95718 | Pt | 0 | 0 | 0.00000 |
| HETATM | 43 | Pt | 19.12116 | 31.10597 | 14.95718 | Pt | 0 | 0 | 0.00000 |
| HETATM | 44 | Pt | 19.12116 | 14.35869 | 14.95718 | Pt | 0 | 0 | 0.00000 |
| HETATM | 45 | Pt | 19.12116 | 22.73233 | 14.95718 | Pt | 0 | 0 | 0.00000 |
| HETATM | 46 | Pt | 4.61759  | 25.52354 | 14.95718 | Pt | 0 | 0 | 0.00000 |
| HETATM | 47 | Pt | 4.61759  | 8.77626  | 14.95718 | Pt | 0 | 0 | 0.00000 |
| HETATM | 48 | Pt | 4.61759  | 17.14990 | 14.95718 | Pt | 0 | 0 | 0.00000 |
| HETATM | 49 | Pt | 11.86937 | 29.71036 | 14.95718 | Pt | 0 | 0 | 0.00000 |
| HETATM | 50 | Pt | 11.86937 | 12.96308 | 14.95718 | Pt | 0 | 0 | 0.00000 |
| HETATM | 51 | Pt | 11.86937 | 21.33672 | 14.95718 | Pt | 0 | 0 | 0.00000 |
| HETATM | 52 | Pt | 19.12116 | 33.89718 | 14.95718 | Pt | 0 | 0 | 0.00000 |
| HETATM | 53 | Pt | 19.12116 | 17.14990 | 14.95718 | Pt | 0 | 0 | 0.00000 |
| HETATM | 54 | Pt | 19.12116 | 25.52354 | 14.95718 | Pt | 0 | 0 | 0.00000 |
| HETATM | 55 | Pt | 7.03485  | 4.58944  | 14.95718 | Pt | 0 | 0 | 0.00000 |
| HETATM | 56 | Pt | 7.03485  | 12.96308 | 14.95718 | Pt | 0 | 0 | 0.00000 |
| HETATM | 57 | Pt | 7.03485  | 21.33672 | 14.95718 | Pt | 0 | 0 | 0.00000 |
| HETATM | 58 | Pt | 14.28663 | 8.77626  | 14.95718 | Pt | 0 | 0 | 0.00000 |
| HETATM | 59 | Pt | 14.28663 | 17.14990 | 14.95718 | Pt | 0 | 0 | 0.00000 |
| HETATM | 60 | Pt | 14.28663 | 25.52354 | 14.95718 | Pt | 0 | 0 | 0.00000 |
| HETATM | 61 | Pt | 21.53842 | 12.96308 | 14.95718 | Pt | 0 | 0 | 0.00000 |
| HETATM | 62 | Pt | 21.53842 | 21.33672 | 14.95718 | Pt | 0 | 0 | 0.00000 |
| HETATM | 63 | Pt | 21.53842 | 29.71036 | 14.95718 | Pt | 0 | 0 | 0.00000 |
| HETATM | 64 | Pt | 7.03485  | 24.12793 | 14.95718 | Pt | 0 | 0 | 0.00000 |
| HETATM | 65 | Pt | 7.03485  | 7.38065  | 14.95718 | Pt | 0 | 0 | 0.00000 |
| HETATM | 66 | Pt | 7.03485  | 15.75429 | 14.95718 | Pt | 0 | 0 | 0.00000 |
| HETATM | 67 | Pt | 14.28663 | 28.31475 | 14.95718 | Pt | 0 | 0 | 0.00000 |
| HETATM | 68 | Pt | 14.28663 | 11.56747 | 14.95718 | Pt | 0 | 0 | 0.00000 |
| HETATM | 69 | Pt | 14.28663 | 19.94111 | 14.95718 | Pt | 0 | 0 | 0.00000 |
| HETATM | 70 | Pt | 21.53842 | 32.50157 | 14.95718 | Pt | 0 | 0 | 0.00000 |
| HETATM | 71 | Pt | 21.53842 | 15.75429 | 14.95718 | Pt | 0 | 0 | 0.00000 |
| HETATM | 72 | Pt | 21.53842 | 24.12793 | 14.95718 | Pt | 0 | 0 | 0.00000 |
| HETATM | 73 | Pt | 7.03485  | 26.91915 | 14.95718 | Pt | 0 | 0 | 0.00000 |
| HETATM | 74 | Pt | 7.03485  | 10.17187 | 14.95718 | Pt | 0 | 0 | 0.00000 |
| HETATM | 75 | Pt | 7.03485  | 18.54551 | 14.95718 | Pt | 0 | 0 | 0.00000 |
| HETATM | 76 | Pt | 14.28663 | 31.10597 | 14.95718 | Pt | 0 | 0 | 0.00000 |
| HETATM | 77 | Pt | 14.28663 | 14.35869 | 14.95718 | Pt | 0 | 0 | 0.00000 |
| HETATM | 78 | Pt | 14.28663 | 22.73233 | 14.95718 | Pt | 0 | 0 | 0.00000 |
| HETATM | 79 | Pt | 21.53842 | 35.29279 | 14.95718 | Pt | 0 | 0 | 0.00000 |
| HETATM | 80 | Pt | 21.53842 | 18.54551 | 14.95718 | Pt | 0 | 0 | 0.00000 |
| HETATM | 81 | Pt | 21.53842 | 26.91915 | 14.95718 | Pt | 0 | 0 | 0.00000 |
| HETATM | 82 | Pt | 3.00608  | 19.94112 | 17.23620 | Pt | 0 | 0 | 0.00000 |
| HETATM | 83 | Pt | 3.00608  | 3.19384  | 17.23620 | Pt | 0 | 0 | 0.00000 |

|        |     |    |          |          |          |    |   |   |         |
|--------|-----|----|----------|----------|----------|----|---|---|---------|
| HETATM | 84  | Pt | 3.00608  | 11.56748 | 17.23620 | Pt | 0 | 0 | 0.00000 |
| HETATM | 85  | Pt | 10.25786 | 24.12794 | 17.23620 | Pt | 0 | 0 | 0.00000 |
| HETATM | 86  | Pt | 10.25786 | 7.38066  | 17.23620 | Pt | 0 | 0 | 0.00000 |
| HETATM | 87  | Pt | 10.25786 | 15.75430 | 17.23620 | Pt | 0 | 0 | 0.00000 |
| HETATM | 88  | Pt | 17.50965 | 28.31476 | 17.23620 | Pt | 0 | 0 | 0.00000 |
| HETATM | 89  | Pt | 17.50965 | 11.56748 | 17.23620 | Pt | 0 | 0 | 0.00000 |
| HETATM | 90  | Pt | 17.50965 | 19.94112 | 17.23620 | Pt | 0 | 0 | 0.00000 |
| HETATM | 91  | Pt | 3.00608  | 22.73233 | 17.23620 | Pt | 0 | 0 | 0.00000 |
| HETATM | 92  | Pt | 3.00608  | 5.98505  | 17.23620 | Pt | 0 | 0 | 0.00000 |
| HETATM | 93  | Pt | 3.00608  | 14.35869 | 17.23620 | Pt | 0 | 0 | 0.00000 |
| HETATM | 94  | Pt | 10.25786 | 26.91915 | 17.23620 | Pt | 0 | 0 | 0.00000 |
| HETATM | 95  | Pt | 10.25786 | 10.17187 | 17.23620 | Pt | 0 | 0 | 0.00000 |
| HETATM | 96  | Pt | 10.25786 | 18.54551 | 17.23620 | Pt | 0 | 0 | 0.00000 |
| HETATM | 97  | Pt | 17.50965 | 31.10597 | 17.23620 | Pt | 0 | 0 | 0.00000 |
| HETATM | 98  | Pt | 17.50965 | 14.35869 | 17.23620 | Pt | 0 | 0 | 0.00000 |
| HETATM | 99  | Pt | 17.50965 | 22.73233 | 17.23620 | Pt | 0 | 0 | 0.00000 |
| HETATM | 100 | Pt | 3.00608  | 25.52354 | 17.23620 | Pt | 0 | 0 | 0.00000 |
| HETATM | 101 | Pt | 3.00608  | 8.77626  | 17.23620 | Pt | 0 | 0 | 0.00000 |
| HETATM | 102 | Pt | 3.00608  | 17.14990 | 17.23620 | Pt | 0 | 0 | 0.00000 |
| HETATM | 103 | Pt | 10.25786 | 29.71036 | 17.23620 | Pt | 0 | 0 | 0.00000 |
| HETATM | 104 | Pt | 10.25786 | 12.96308 | 17.23620 | Pt | 0 | 0 | 0.00000 |
| HETATM | 105 | Pt | 10.25786 | 21.33672 | 17.23620 | Pt | 0 | 0 | 0.00000 |
| HETATM | 106 | Pt | 17.50965 | 33.89718 | 17.23620 | Pt | 0 | 0 | 0.00000 |
| HETATM | 107 | Pt | 17.50965 | 17.14990 | 17.23620 | Pt | 0 | 0 | 0.00000 |
| HETATM | 108 | Pt | 17.50965 | 25.52354 | 17.23620 | Pt | 0 | 0 | 0.00000 |
| HETATM | 109 | Pt | 5.42334  | 21.33672 | 17.23620 | Pt | 0 | 0 | 0.00000 |
| HETATM | 110 | Pt | 5.42334  | 4.58944  | 17.23620 | Pt | 0 | 0 | 0.00000 |
| HETATM | 111 | Pt | 5.42334  | 12.96308 | 17.23620 | Pt | 0 | 0 | 0.00000 |
| HETATM | 112 | Pt | 12.67512 | 25.52354 | 17.23620 | Pt | 0 | 0 | 0.00000 |
| HETATM | 113 | Pt | 12.67512 | 8.77626  | 17.23620 | Pt | 0 | 0 | 0.00000 |
| HETATM | 114 | Pt | 12.67512 | 17.14990 | 17.23620 | Pt | 0 | 0 | 0.00000 |
| HETATM | 115 | Pt | 19.92691 | 29.71036 | 17.23620 | Pt | 0 | 0 | 0.00000 |
| HETATM | 116 | Pt | 19.92691 | 12.96308 | 17.23620 | Pt | 0 | 0 | 0.00000 |
| HETATM | 117 | Pt | 19.92691 | 21.33672 | 17.23620 | Pt | 0 | 0 | 0.00000 |
| HETATM | 118 | Pt | 5.42334  | 24.12793 | 17.23620 | Pt | 0 | 0 | 0.00000 |
| HETATM | 119 | Pt | 5.42334  | 7.38065  | 17.23620 | Pt | 0 | 0 | 0.00000 |
| HETATM | 120 | Pt | 5.42334  | 15.75429 | 17.23620 | Pt | 0 | 0 | 0.00000 |
| HETATM | 121 | Pt | 12.67512 | 28.31475 | 17.23620 | Pt | 0 | 0 | 0.00000 |
| HETATM | 122 | Pt | 12.67512 | 11.56747 | 17.23620 | Pt | 0 | 0 | 0.00000 |
| HETATM | 123 | Pt | 12.67512 | 19.94111 | 17.23620 | Pt | 0 | 0 | 0.00000 |
| HETATM | 124 | Pt | 19.92691 | 32.50157 | 17.23620 | Pt | 0 | 0 | 0.00000 |
| HETATM | 125 | Pt | 19.92691 | 15.75429 | 17.23620 | Pt | 0 | 0 | 0.00000 |
| HETATM | 126 | Pt | 19.92691 | 24.12793 | 17.23620 | Pt | 0 | 0 | 0.00000 |
| HETATM | 127 | Pt | 5.42334  | 26.91915 | 17.23620 | Pt | 0 | 0 | 0.00000 |
| HETATM | 128 | Pt | 5.42334  | 10.17187 | 17.23620 | Pt | 0 | 0 | 0.00000 |
| HETATM | 129 | Pt | 5.42334  | 18.54551 | 17.23620 | Pt | 0 | 0 | 0.00000 |
| HETATM | 130 | Pt | 12.67512 | 31.10597 | 17.23620 | Pt | 0 | 0 | 0.00000 |
| HETATM | 131 | Pt | 12.67512 | 14.35869 | 17.23620 | Pt | 0 | 0 | 0.00000 |
| HETATM | 132 | Pt | 12.67512 | 22.73233 | 17.23620 | Pt | 0 | 0 | 0.00000 |
| HETATM | 133 | Pt | 19.92691 | 35.29279 | 17.23620 | Pt | 0 | 0 | 0.00000 |
| HETATM | 134 | Pt | 19.92691 | 18.54551 | 17.23620 | Pt | 0 | 0 | 0.00000 |
| HETATM | 135 | Pt | 19.92691 | 26.91915 | 17.23620 | Pt | 0 | 0 | 0.00000 |
| HETATM | 136 | Pt | 7.84060  | 22.73233 | 17.23620 | Pt | 0 | 0 | 0.00000 |
| HETATM | 137 | Pt | 7.84060  | 5.98505  | 17.23620 | Pt | 0 | 0 | 0.00000 |
| HETATM | 138 | Pt | 7.84060  | 14.35869 | 17.23620 | Pt | 0 | 0 | 0.00000 |
| HETATM | 139 | Pt | 15.09238 | 26.91915 | 17.23620 | Pt | 0 | 0 | 0.00000 |
| HETATM | 140 | Pt | 15.09238 | 10.17187 | 17.23620 | Pt | 0 | 0 | 0.00000 |
| HETATM | 141 | Pt | 15.09238 | 18.54551 | 17.23620 | Pt | 0 | 0 | 0.00000 |
| HETATM | 142 | Pt | 0.58881  | 18.54551 | 17.23620 | Pt | 0 | 0 | 0.00000 |
| HETATM | 143 | Pt | 0.58881  | 1.79823  | 17.23620 | Pt | 0 | 0 | 0.00000 |
| HETATM | 144 | Pt | 0.58881  | 10.17187 | 17.23620 | Pt | 0 | 0 | 0.00000 |
| HETATM | 145 | Pt | 7.84060  | 25.52354 | 17.23620 | Pt | 0 | 0 | 0.00000 |
| HETATM | 146 | Pt | 7.84060  | 8.77626  | 17.23620 | Pt | 0 | 0 | 0.00000 |

|        |     |    |          |          |          |    |   |   |         |
|--------|-----|----|----------|----------|----------|----|---|---|---------|
| HETATM | 147 | Pt | 7.84060  | 17.14990 | 17.23620 | Pt | 0 | 0 | 0.00000 |
| HETATM | 148 | Pt | 15.09238 | 29.71036 | 17.23620 | Pt | 0 | 0 | 0.00000 |
| HETATM | 149 | Pt | 15.09238 | 12.96308 | 17.23620 | Pt | 0 | 0 | 0.00000 |
| HETATM | 150 | Pt | 15.09238 | 21.33672 | 17.23620 | Pt | 0 | 0 | 0.00000 |
| HETATM | 151 | Pt | 0.58881  | 21.33672 | 17.23620 | Pt | 0 | 0 | 0.00000 |
| HETATM | 152 | Pt | 0.58881  | 4.58944  | 17.23620 | Pt | 0 | 0 | 0.00000 |
| HETATM | 153 | Pt | 0.58881  | 12.96308 | 17.23620 | Pt | 0 | 0 | 0.00000 |
| HETATM | 154 | Pt | 7.84060  | 28.31475 | 17.23620 | Pt | 0 | 0 | 0.00000 |
| HETATM | 155 | Pt | 7.84060  | 11.56747 | 17.23620 | Pt | 0 | 0 | 0.00000 |
| HETATM | 156 | Pt | 7.84060  | 19.94111 | 17.23620 | Pt | 0 | 0 | 0.00000 |
| HETATM | 157 | Pt | 15.09238 | 32.50157 | 17.23620 | Pt | 0 | 0 | 0.00000 |
| HETATM | 158 | Pt | 15.09238 | 15.75429 | 17.23620 | Pt | 0 | 0 | 0.00000 |
| HETATM | 159 | Pt | 15.09238 | 24.12793 | 17.23620 | Pt | 0 | 0 | 0.00000 |
| HETATM | 160 | Pt | 0.58881  | 24.12793 | 17.23620 | Pt | 0 | 0 | 0.00000 |
| HETATM | 161 | Pt | 0.58881  | 7.38065  | 17.23620 | Pt | 0 | 0 | 0.00000 |
| HETATM | 162 | Pt | 0.58881  | 15.75429 | 17.23620 | Pt | 0 | 0 | 0.00000 |
| HETATM | 163 | Pt | 3.81170  | 21.33701 | 19.51557 | Pt | 0 | 0 | 0.00000 |
| HETATM | 164 | Pt | 3.81199  | 4.58918  | 19.51599 | Pt | 0 | 0 | 0.00000 |
| HETATM | 165 | Pt | 3.81179  | 12.96277 | 19.51492 | Pt | 0 | 0 | 0.00000 |
| HETATM | 166 | Pt | 11.06340 | 25.52327 | 19.51608 | Pt | 0 | 0 | 0.00000 |
| HETATM | 167 | Pt | 11.06319 | 8.77535  | 19.51318 | Pt | 0 | 0 | 0.00000 |
| HETATM | 168 | Pt | 11.06359 | 17.15026 | 19.51506 | Pt | 0 | 0 | 0.00000 |
| HETATM | 169 | Pt | 18.31537 | 29.71043 | 19.51528 | Pt | 0 | 0 | 0.00000 |
| HETATM | 170 | Pt | 18.31596 | 12.96309 | 19.51369 | Pt | 0 | 0 | 0.00000 |
| HETATM | 171 | Pt | 18.31532 | 21.33702 | 19.51439 | Pt | 0 | 0 | 0.00000 |
| HETATM | 172 | Pt | 3.81184  | 24.12816 | 19.51591 | Pt | 0 | 0 | 0.00000 |
| HETATM | 173 | Pt | 3.81219  | 7.38030  | 19.51551 | Pt | 0 | 0 | 0.00000 |
| HETATM | 174 | Pt | 3.81176  | 15.75427 | 19.51508 | Pt | 0 | 0 | 0.00000 |
| HETATM | 175 | Pt | 11.06341 | 28.31424 | 19.51582 | Pt | 0 | 0 | 0.00000 |
| HETATM | 176 | Pt | 11.06347 | 11.56779 | 19.51317 | Pt | 0 | 0 | 0.00000 |
| HETATM | 177 | Pt | 11.06362 | 19.94138 | 19.51556 | Pt | 0 | 0 | 0.00000 |
| HETATM | 178 | Pt | 18.31558 | 32.50158 | 19.51536 | Pt | 0 | 0 | 0.00000 |
| HETATM | 179 | Pt | 18.31518 | 15.75445 | 19.51417 | Pt | 0 | 0 | 0.00000 |
| HETATM | 180 | Pt | 18.31538 | 24.12824 | 19.51490 | Pt | 0 | 0 | 0.00000 |
| HETATM | 181 | Pt | 3.81181  | 26.91915 | 19.51621 | Pt | 0 | 0 | 0.00000 |
| HETATM | 182 | Pt | 3.81200  | 10.17152 | 19.51506 | Pt | 0 | 0 | 0.00000 |
| HETATM | 183 | Pt | 3.81160  | 18.54580 | 19.51532 | Pt | 0 | 0 | 0.00000 |
| HETATM | 184 | Pt | 11.06305 | 31.10502 | 19.51480 | Pt | 0 | 0 | 0.00000 |
| HETATM | 185 | Pt | 11.06329 | 14.35952 | 19.51409 | Pt | 0 | 0 | 0.00000 |
| HETATM | 186 | Pt | 11.06339 | 22.73235 | 19.51613 | Pt | 0 | 0 | 0.00000 |
| HETATM | 187 | Pt | 18.31631 | 35.29281 | 19.51437 | Pt | 0 | 0 | 0.00000 |
| HETATM | 188 | Pt | 18.31527 | 18.54582 | 19.51412 | Pt | 0 | 0 | 0.00000 |
| HETATM | 189 | Pt | 18.31534 | 26.91939 | 19.51516 | Pt | 0 | 0 | 0.00000 |
| HETATM | 190 | Pt | 6.22886  | 22.73261 | 19.51578 | Pt | 0 | 0 | 0.00000 |
| HETATM | 191 | Pt | 6.22905  | 5.98454  | 19.51588 | Pt | 0 | 0 | 0.00000 |
| HETATM | 192 | Pt | 6.22880  | 14.35857 | 19.51455 | Pt | 0 | 0 | 0.00000 |
| HETATM | 193 | Pt | 13.48061 | 26.91930 | 19.51555 | Pt | 0 | 0 | 0.00000 |
| HETATM | 194 | Pt | 13.48096 | 10.17115 | 19.51208 | Pt | 0 | 0 | 0.00000 |
| HETATM | 195 | Pt | 13.48069 | 18.54607 | 19.51484 | Pt | 0 | 0 | 0.00000 |
| HETATM | 196 | Pt | 20.73267 | 31.10611 | 19.51542 | Pt | 0 | 0 | 0.00000 |
| HETATM | 197 | Pt | 20.73304 | 14.35895 | 19.51487 | Pt | 0 | 0 | 0.00000 |
| HETATM | 198 | Pt | 20.73278 | 22.73241 | 19.51481 | Pt | 0 | 0 | 0.00000 |
| HETATM | 199 | Pt | 6.22896  | 25.52334 | 19.51620 | Pt | 0 | 0 | 0.00000 |
| HETATM | 200 | Pt | 6.22930  | 8.77580  | 19.51543 | Pt | 0 | 0 | 0.00000 |
| HETATM | 201 | Pt | 6.22865  | 17.15014 | 19.51454 | Pt | 0 | 0 | 0.00000 |
| HETATM | 202 | Pt | 13.48063 | 29.71014 | 19.51544 | Pt | 0 | 0 | 0.00000 |
| HETATM | 203 | Pt | 13.48072 | 12.96336 | 19.51310 | Pt | 0 | 0 | 0.00000 |
| HETATM | 204 | Pt | 13.48048 | 21.33709 | 19.51541 | Pt | 0 | 0 | 0.00000 |
| HETATM | 205 | Pt | 20.73293 | 33.89721 | 19.51531 | Pt | 0 | 0 | 0.00000 |
| HETATM | 206 | Pt | 20.73269 | 17.14987 | 19.51484 | Pt | 0 | 0 | 0.00000 |
| HETATM | 207 | Pt | 20.73269 | 25.52358 | 19.51510 | Pt | 0 | 0 | 0.00000 |
| HETATM | 208 | Pt | 6.22901  | 28.31429 | 19.51619 | Pt | 0 | 0 | 0.00000 |
| HETATM | 209 | Pt | 6.22917  | 11.56710 | 19.51490 | Pt | 0 | 0 | 0.00000 |

|        |     |    |          |          |          |    |   |   |         |
|--------|-----|----|----------|----------|----------|----|---|---|---------|
| HETATM | 210 | Pt | 6.22885  | 19.94155 | 19.51506 | Pt | 0 | 0 | 0.00000 |
| HETATM | 211 | Pt | 13.48071 | 32.50079 | 19.51414 | Pt | 0 | 0 | 0.00000 |
| HETATM | 212 | Pt | 13.48060 | 15.75469 | 19.51472 | Pt | 0 | 0 | 0.00000 |
| HETATM | 213 | Pt | 13.48058 | 24.12822 | 19.51550 | Pt | 0 | 0 | 0.00000 |
| HETATM | 214 | Pt | 20.73335 | 36.68871 | 19.51506 | Pt | 0 | 0 | 0.00000 |
| HETATM | 215 | Pt | 20.73298 | 19.94110 | 19.51459 | Pt | 0 | 0 | 0.00000 |
| HETATM | 216 | Pt | 20.73275 | 28.31486 | 19.51525 | Pt | 0 | 0 | 0.00000 |
| HETATM | 217 | Pt | 8.64630  | 24.12766 | 19.51629 | Pt | 0 | 0 | 0.00000 |
| HETATM | 218 | Pt | 8.64600  | 7.37965  | 19.51474 | Pt | 0 | 0 | 0.00000 |
| HETATM | 219 | Pt | 8.64605  | 15.75487 | 19.51419 | Pt | 0 | 0 | 0.00000 |
| HETATM | 220 | Pt | 15.89807 | 28.31494 | 19.51528 | Pt | 0 | 0 | 0.00000 |
| HETATM | 221 | Pt | 15.89893 | 11.56704 | 19.51237 | Pt | 0 | 0 | 0.00000 |
| HETATM | 222 | Pt | 15.89781 | 19.94170 | 19.51440 | Pt | 0 | 0 | 0.00000 |
| HETATM | 223 | Pt | 1.39461  | 19.94130 | 19.51554 | Pt | 0 | 0 | 0.00000 |
| HETATM | 224 | Pt | 1.39495  | 3.19388  | 19.51564 | Pt | 0 | 0 | 0.00000 |
| HETATM | 225 | Pt | 1.39473  | 11.56730 | 19.51497 | Pt | 0 | 0 | 0.00000 |
| HETATM | 226 | Pt | 8.64616  | 26.91859 | 19.51617 | Pt | 0 | 0 | 0.00000 |
| HETATM | 227 | Pt | 8.64624  | 10.17174 | 19.51439 | Pt | 0 | 0 | 0.00000 |
| HETATM | 228 | Pt | 8.64625  | 18.54589 | 19.51494 | Pt | 0 | 0 | 0.00000 |
| HETATM | 229 | Pt | 15.89808 | 31.10601 | 19.51538 | Pt | 0 | 0 | 0.00000 |
| HETATM | 230 | Pt | 15.89768 | 14.35882 | 19.51381 | Pt | 0 | 0 | 0.00000 |
| HETATM | 231 | Pt | 15.89777 | 22.73294 | 19.51478 | Pt | 0 | 0 | 0.00000 |
| HETATM | 232 | Pt | 1.39478  | 22.73262 | 19.51545 | Pt | 0 | 0 | 0.00000 |
| HETATM | 233 | Pt | 1.39481  | 5.98487  | 19.51535 | Pt | 0 | 0 | 0.00000 |
| HETATM | 234 | Pt | 1.39455  | 14.35873 | 19.51512 | Pt | 0 | 0 | 0.00000 |
| HETATM | 235 | Pt | 8.64598  | 29.70940 | 19.51575 | Pt | 0 | 0 | 0.00000 |
| HETATM | 236 | Pt | 8.64605  | 12.96336 | 19.51418 | Pt | 0 | 0 | 0.00000 |
| HETATM | 237 | Pt | 8.64619  | 21.33684 | 19.51571 | Pt | 0 | 0 | 0.00000 |
| HETATM | 238 | Pt | 15.89859 | 33.89672 | 19.51411 | Pt | 0 | 0 | 0.00000 |
| HETATM | 239 | Pt | 15.89776 | 17.15028 | 19.51402 | Pt | 0 | 0 | 0.00000 |
| HETATM | 240 | Pt | 15.89788 | 25.52387 | 19.51513 | Pt | 0 | 0 | 0.00000 |
| HETATM | 241 | Pt | 1.39473  | 25.52378 | 19.51586 | Pt | 0 | 0 | 0.00000 |
| HETATM | 242 | Pt | 1.39485  | 8.77596  | 19.51496 | Pt | 0 | 0 | 0.00000 |
| HETATM | 243 | Pt | 1.39452  | 17.14998 | 19.51535 | Pt | 0 | 0 | 0.00000 |
| HETATM | 244 | Pt | 2.19968  | 1.79799  | 21.79605 | Pt | 0 | 0 | 0.00000 |
| HETATM | 245 | Pt | 2.20030  | 10.17100 | 21.79366 | Pt | 0 | 0 | 0.00000 |
| HETATM | 246 | Pt | 2.19970  | 18.54519 | 21.79469 | Pt | 0 | 0 | 0.00000 |
| HETATM | 247 | Pt | 9.45134  | 5.98313  | 21.79437 | Pt | 0 | 0 | 0.00000 |
| HETATM | 248 | Pt | 9.45103  | 14.35935 | 21.79179 | Pt | 0 | 0 | 0.00000 |
| HETATM | 249 | Pt | 9.45190  | 22.73095 | 21.79638 | Pt | 0 | 0 | 0.00000 |
| HETATM | 250 | Pt | 16.70526 | 10.17104 | 21.79089 | Pt | 0 | 0 | 0.00000 |
| HETATM | 251 | Pt | 16.70300 | 18.54594 | 21.79165 | Pt | 0 | 0 | 0.00000 |
| HETATM | 252 | Pt | 16.70356 | 26.91902 | 21.79409 | Pt | 0 | 0 | 0.00000 |
| HETATM | 253 | Pt | 2.19967  | 21.33763 | 21.79490 | Pt | 0 | 0 | 0.00000 |
| HETATM | 254 | Pt | 2.20022  | 4.59007  | 21.79539 | Pt | 0 | 0 | 0.00000 |
| HETATM | 255 | Pt | 2.19999  | 12.96343 | 21.79367 | Pt | 0 | 0 | 0.00000 |
| HETATM | 256 | Pt | 9.45195  | 25.52302 | 21.79631 | Pt | 0 | 0 | 0.00000 |
| HETATM | 257 | Pt | 9.45116  | 8.77503  | 21.79105 | Pt | 0 | 0 | 0.00000 |
| HETATM | 258 | Pt | 9.45213  | 17.15016 | 21.79329 | Pt | 0 | 0 | 0.00000 |
| HETATM | 259 | Pt | 16.70358 | 29.71119 | 21.79436 | Pt | 0 | 0 | 0.00000 |
| HETATM | 260 | Pt | 16.70378 | 12.96309 | 21.78909 | Pt | 0 | 0 | 0.00000 |
| HETATM | 261 | Pt | 16.70335 | 21.33827 | 21.79235 | Pt | 0 | 0 | 0.00000 |
| HETATM | 262 | Pt | 2.20055  | 24.12837 | 21.79535 | Pt | 0 | 0 | 0.00000 |
| HETATM | 263 | Pt | 2.20138  | 7.38040  | 21.79429 | Pt | 0 | 0 | 0.00000 |
| HETATM | 264 | Pt | 2.20088  | 15.75431 | 21.79415 | Pt | 0 | 0 | 0.00000 |
| HETATM | 265 | Pt | 9.45262  | 28.31361 | 21.79571 | Pt | 0 | 0 | 0.00000 |
| HETATM | 266 | Pt | 9.45264  | 11.56835 | 21.79147 | Pt | 0 | 0 | 0.00000 |
| HETATM | 267 | Pt | 9.45266  | 19.94095 | 21.79449 | Pt | 0 | 0 | 0.00000 |
| HETATM | 268 | Pt | 16.70444 | 32.50175 | 21.79459 | Pt | 0 | 0 | 0.00000 |
| HETATM | 269 | Pt | 16.70267 | 15.75481 | 21.79145 | Pt | 0 | 0 | 0.00000 |
| HETATM | 270 | Pt | 16.70438 | 24.12866 | 21.79355 | Pt | 0 | 0 | 0.00000 |
| HETATM | 271 | Pt | 4.61798  | 3.19365  | 21.79628 | Pt | 0 | 0 | 0.00000 |
| HETATM | 272 | Pt | 4.61832  | 11.56694 | 21.79365 | Pt | 0 | 0 | 0.00000 |

|        |     |    |          |          |          |    |   |   |         |
|--------|-----|----|----------|----------|----------|----|---|---|---------|
| HETATM | 273 | Pt | 4.61766  | 19.94157 | 21.79447 | Pt | 0 | 0 | 0.00000 |
| HETATM | 274 | Pt | 11.86905 | 7.37905  | 21.79152 | Pt | 0 | 0 | 0.00000 |
| HETATM | 275 | Pt | 11.86987 | 15.75445 | 21.79416 | Pt | 0 | 0 | 0.00000 |
| HETATM | 276 | Pt | 11.87006 | 24.12741 | 21.79586 | Pt | 0 | 0 | 0.00000 |
| HETATM | 277 | Pt | 19.12245 | 11.56822 | 21.79291 | Pt | 0 | 0 | 0.00000 |
| HETATM | 278 | Pt | 19.12197 | 19.94156 | 21.79202 | Pt | 0 | 0 | 0.00000 |
| HETATM | 279 | Pt | 19.12184 | 28.31500 | 21.79417 | Pt | 0 | 0 | 0.00000 |
| HETATM | 280 | Pt | 4.61677  | 22.73213 | 21.79551 | Pt | 0 | 0 | 0.00000 |
| HETATM | 281 | Pt | 4.61753  | 5.98428  | 21.79563 | Pt | 0 | 0 | 0.00000 |
| HETATM | 282 | Pt | 4.61710  | 14.35759 | 21.79354 | Pt | 0 | 0 | 0.00000 |
| HETATM | 283 | Pt | 11.86912 | 26.91811 | 21.79558 | Pt | 0 | 0 | 0.00000 |
| HETATM | 284 | Pt | 11.86906 | 10.17071 | 21.78745 | Pt | 0 | 0 | 0.00000 |
| HETATM | 285 | Pt | 11.86955 | 18.54490 | 21.79428 | Pt | 0 | 0 | 0.00000 |
| HETATM | 286 | Pt | 19.12066 | 31.10558 | 21.79451 | Pt | 0 | 0 | 0.00000 |
| HETATM | 287 | Pt | 19.12075 | 14.35866 | 21.79173 | Pt | 0 | 0 | 0.00000 |
| HETATM | 288 | Pt | 19.12101 | 22.73223 | 21.79303 | Pt | 0 | 0 | 0.00000 |
| HETATM | 289 | Pt | 4.61697  | 25.52404 | 21.79616 | Pt | 0 | 0 | 0.00000 |
| HETATM | 290 | Pt | 4.61782  | 8.77650  | 21.79449 | Pt | 0 | 0 | 0.00000 |
| HETATM | 291 | Pt | 4.61688  | 17.15050 | 21.79381 | Pt | 0 | 0 | 0.00000 |
| HETATM | 292 | Pt | 11.86898 | 29.71025 | 21.79485 | Pt | 0 | 0 | 0.00000 |
| HETATM | 293 | Pt | 11.86862 | 12.96514 | 21.79034 | Pt | 0 | 0 | 0.00000 |
| HETATM | 294 | Pt | 11.86902 | 21.33681 | 21.79584 | Pt | 0 | 0 | 0.00000 |
| HETATM | 295 | Pt | 19.12087 | 33.89777 | 21.79422 | Pt | 0 | 0 | 0.00000 |
| HETATM | 296 | Pt | 19.11995 | 17.15079 | 21.79234 | Pt | 0 | 0 | 0.00000 |
| HETATM | 297 | Pt | 19.12091 | 25.52441 | 21.79392 | Pt | 0 | 0 | 0.00000 |
| HETATM | 298 | Pt | 7.03438  | 4.58916  | 21.79587 | Pt | 0 | 0 | 0.00000 |
| HETATM | 299 | Pt | 7.03430  | 12.96295 | 21.79306 | Pt | 0 | 0 | 0.00000 |
| HETATM | 300 | Pt | 7.03398  | 21.33755 | 21.79468 | Pt | 0 | 0 | 0.00000 |
| HETATM | 301 | Pt | 14.28656 | 8.77551  | 21.79026 | Pt | 0 | 0 | 0.00000 |
| HETATM | 302 | Pt | 14.28607 | 17.15114 | 21.79278 | Pt | 0 | 0 | 0.00000 |
| HETATM | 303 | Pt | 14.28617 | 25.52436 | 21.79453 | Pt | 0 | 0 | 0.00000 |
| HETATM | 304 | Pt | 21.53774 | 12.96437 | 21.79502 | Pt | 0 | 0 | 0.00000 |
| HETATM | 305 | Pt | 21.53856 | 21.33724 | 21.79320 | Pt | 0 | 0 | 0.00000 |
| HETATM | 306 | Pt | 21.53804 | 29.71110 | 21.79447 | Pt | 0 | 0 | 0.00000 |
| HETATM | 307 | Pt | 7.03524  | 24.12759 | 21.79610 | Pt | 0 | 0 | 0.00000 |
| HETATM | 308 | Pt | 7.03553  | 7.38006  | 21.79499 | Pt | 0 | 0 | 0.00000 |
| HETATM | 309 | Pt | 7.03464  | 15.75412 | 21.79202 | Pt | 0 | 0 | 0.00000 |
| HETATM | 310 | Pt | 14.28723 | 28.31495 | 21.79463 | Pt | 0 | 0 | 0.00000 |
| HETATM | 311 | Pt | 14.28806 | 11.56631 | 21.78623 | Pt | 0 | 0 | 0.00000 |
| HETATM | 312 | Pt | 14.28696 | 19.94168 | 21.79392 | Pt | 0 | 0 | 0.00000 |
| HETATM | 313 | Pt | 21.53873 | 32.50179 | 21.79474 | Pt | 0 | 0 | 0.00000 |
| HETATM | 314 | Pt | 21.53925 | 15.75473 | 21.79396 | Pt | 0 | 0 | 0.00000 |
| HETATM | 315 | Pt | 21.53923 | 24.12795 | 21.79372 | Pt | 0 | 0 | 0.00000 |
| HETATM | 316 | Pt | 7.03447  | 26.91801 | 21.79626 | Pt | 0 | 0 | 0.00000 |
| HETATM | 317 | Pt | 7.03518  | 10.17106 | 21.79412 | Pt | 0 | 0 | 0.00000 |
| HETATM | 318 | Pt | 7.03397  | 18.54540 | 21.79271 | Pt | 0 | 0 | 0.00000 |
| HETATM | 319 | Pt | 14.28624 | 31.10546 | 21.79446 | Pt | 0 | 0 | 0.00000 |
| HETATM | 320 | Pt | 14.28493 | 14.35841 | 21.79250 | Pt | 0 | 0 | 0.00000 |
| HETATM | 321 | Pt | 14.28608 | 22.73224 | 21.79426 | Pt | 0 | 0 | 0.00000 |
| HETATM | 322 | Pt | 21.53816 | 35.29264 | 21.79412 | Pt | 0 | 0 | 0.00000 |
| HETATM | 323 | Pt | 21.53813 | 18.54495 | 21.79365 | Pt | 0 | 0 | 0.00000 |
| HETATM | 324 | Pt | 21.53818 | 26.91875 | 21.79412 | Pt | 0 | 0 | 0.00000 |
| HETATM | 325 | Pt | 3.00499  | 19.94142 | 24.06982 | Pt | 0 | 0 | 0.00000 |
| HETATM | 326 | Pt | 3.00496  | 3.19427  | 24.07200 | Pt | 0 | 0 | 0.00000 |
| HETATM | 327 | Pt | 3.00613  | 11.56726 | 24.06789 | Pt | 0 | 0 | 0.00000 |
| HETATM | 328 | Pt | 10.25906 | 24.12550 | 24.07225 | Pt | 0 | 0 | 0.00000 |
| HETATM | 329 | Pt | 10.25823 | 7.38010  | 24.06795 | Pt | 0 | 0 | 0.00000 |
| HETATM | 330 | Pt | 10.25975 | 15.75118 | 24.06972 | Pt | 0 | 0 | 0.00000 |
| HETATM | 331 | Pt | 17.50981 | 28.31520 | 24.06877 | Pt | 0 | 0 | 0.00000 |
| HETATM | 332 | Pt | 17.50969 | 11.56860 | 24.06536 | Pt | 0 | 0 | 0.00000 |
| HETATM | 333 | Pt | 17.50997 | 19.94262 | 24.06434 | Pt | 0 | 0 | 0.00000 |
| HETATM | 334 | Pt | 3.00472  | 22.73282 | 24.07710 | Pt | 0 | 0 | 0.00000 |
| HETATM | 335 | Pt | 3.00621  | 5.98547  | 24.07711 | Pt | 0 | 0 | 0.00000 |

|        |     |    |          |          |          |    |   |   |         |
|--------|-----|----|----------|----------|----------|----|---|---|---------|
| HETATM | 336 | Pt | 3.00608  | 14.35827 | 24.07466 | Pt | 0 | 0 | 0.00000 |
| HETATM | 337 | Pt | 10.25861 | 26.91771 | 24.07782 | Pt | 0 | 0 | 0.00000 |
| HETATM | 338 | Pt | 10.25698 | 10.16840 | 24.06389 | Pt | 0 | 0 | 0.00000 |
| HETATM | 339 | Pt | 10.25911 | 18.54416 | 24.07369 | Pt | 0 | 0 | 0.00000 |
| HETATM | 340 | Pt | 17.50901 | 31.10664 | 24.07601 | Pt | 0 | 0 | 0.00000 |
| HETATM | 341 | Pt | 17.50669 | 14.35913 | 24.06684 | Pt | 0 | 0 | 0.00000 |
| HETATM | 342 | Pt | 17.50995 | 22.73333 | 24.07324 | Pt | 0 | 0 | 0.00000 |
| HETATM | 343 | Pt | 3.00475  | 25.52386 | 24.07784 | Pt | 0 | 0 | 0.00000 |
| HETATM | 344 | Pt | 3.00679  | 8.77629  | 24.07513 | Pt | 0 | 0 | 0.00000 |
| HETATM | 345 | Pt | 3.00576  | 17.14989 | 24.07555 | Pt | 0 | 0 | 0.00000 |
| HETATM | 346 | Pt | 10.25819 | 29.70952 | 24.07627 | Pt | 0 | 0 | 0.00000 |
| HETATM | 347 | Pt | 10.25743 | 12.96834 | 24.07096 | Pt | 0 | 0 | 0.00000 |
| HETATM | 348 | Pt | 10.25887 | 21.33372 | 24.07888 | Pt | 0 | 0 | 0.00000 |
| HETATM | 349 | Pt | 17.50826 | 33.89769 | 24.07633 | Pt | 0 | 0 | 0.00000 |
| HETATM | 350 | Pt | 17.50592 | 17.15093 | 24.07119 | Pt | 0 | 0 | 0.00000 |
| HETATM | 351 | Pt | 17.50978 | 25.52415 | 24.07500 | Pt | 0 | 0 | 0.00000 |
| HETATM | 352 | Pt | 5.42250  | 21.33680 | 24.07672 | Pt | 0 | 0 | 0.00000 |
| HETATM | 353 | Pt | 5.42333  | 4.58963  | 24.07812 | Pt | 0 | 0 | 0.00000 |
| HETATM | 354 | Pt | 5.42368  | 12.96181 | 24.07469 | Pt | 0 | 0 | 0.00000 |
| HETATM | 355 | Pt | 12.67586 | 25.52238 | 24.07728 | Pt | 0 | 0 | 0.00000 |
| HETATM | 356 | Pt | 12.67342 | 8.77422  | 24.06606 | Pt | 0 | 0 | 0.00000 |
| HETATM | 357 | Pt | 12.67734 | 17.14736 | 24.07515 | Pt | 0 | 0 | 0.00000 |
| HETATM | 358 | Pt | 19.92662 | 29.71087 | 24.07561 | Pt | 0 | 0 | 0.00000 |
| HETATM | 359 | Pt | 19.92356 | 12.96528 | 24.07590 | Pt | 0 | 0 | 0.00000 |
| HETATM | 360 | Pt | 19.92755 | 21.33723 | 24.07285 | Pt | 0 | 0 | 0.00000 |
| HETATM | 361 | Pt | 5.42271  | 24.12750 | 24.07190 | Pt | 0 | 0 | 0.00000 |
| HETATM | 362 | Pt | 5.42421  | 7.38112  | 24.07052 | Pt | 0 | 0 | 0.00000 |
| HETATM | 363 | Pt | 5.42306  | 15.75328 | 24.06734 | Pt | 0 | 0 | 0.00000 |
| HETATM | 364 | Pt | 12.67564 | 28.31465 | 24.07025 | Pt | 0 | 0 | 0.00000 |
| HETATM | 365 | Pt | 12.67785 | 11.57003 | 24.05477 | Pt | 0 | 0 | 0.00000 |
| HETATM | 366 | Pt | 12.67578 | 19.93906 | 24.07103 | Pt | 0 | 0 | 0.00000 |
| HETATM | 367 | Pt | 19.92554 | 32.50200 | 24.06961 | Pt | 0 | 0 | 0.00000 |
| HETATM | 368 | Pt | 19.92638 | 15.75529 | 24.06565 | Pt | 0 | 0 | 0.00000 |
| HETATM | 369 | Pt | 19.92721 | 24.12831 | 24.06812 | Pt | 0 | 0 | 0.00000 |
| HETATM | 370 | Pt | 5.42296  | 26.91897 | 24.07813 | Pt | 0 | 0 | 0.00000 |
| HETATM | 371 | Pt | 5.42445  | 10.17224 | 24.07530 | Pt | 0 | 0 | 0.00000 |
| HETATM | 372 | Pt | 5.42252  | 18.54585 | 24.07449 | Pt | 0 | 0 | 0.00000 |
| HETATM | 373 | Pt | 12.67590 | 31.10664 | 24.07574 | Pt | 0 | 0 | 0.00000 |
| HETATM | 374 | Pt | 12.67284 | 14.35856 | 24.07791 | Pt | 0 | 0 | 0.00000 |
| HETATM | 375 | Pt | 12.67620 | 22.73033 | 24.07752 | Pt | 0 | 0 | 0.00000 |
| HETATM | 376 | Pt | 19.92574 | 35.29357 | 24.07392 | Pt | 0 | 0 | 0.00000 |
| HETATM | 377 | Pt | 19.92575 | 18.54576 | 24.07287 | Pt | 0 | 0 | 0.00000 |
| HETATM | 378 | Pt | 19.92699 | 26.91953 | 24.07524 | Pt | 0 | 0 | 0.00000 |
| HETATM | 379 | Pt | 7.84082  | 22.73117 | 24.07767 | Pt | 0 | 0 | 0.00000 |
| HETATM | 380 | Pt | 7.84100  | 5.98487  | 24.07671 | Pt | 0 | 0 | 0.00000 |
| HETATM | 381 | Pt | 7.83956  | 14.35701 | 24.07202 | Pt | 0 | 0 | 0.00000 |
| HETATM | 382 | Pt | 15.09258 | 26.91942 | 24.07550 | Pt | 0 | 0 | 0.00000 |
| HETATM | 383 | Pt | 15.09536 | 10.16996 | 24.06541 | Pt | 0 | 0 | 0.00000 |
| HETATM | 384 | Pt | 15.09273 | 18.54563 | 24.07391 | Pt | 0 | 0 | 0.00000 |
| HETATM | 385 | Pt | 0.58794  | 18.54595 | 24.07620 | Pt | 0 | 0 | 0.00000 |
| HETATM | 386 | Pt | 0.58654  | 1.79890  | 24.07766 | Pt | 0 | 0 | 0.00000 |
| HETATM | 387 | Pt | 0.58928  | 10.17185 | 24.07448 | Pt | 0 | 0 | 0.00000 |
| HETATM | 388 | Pt | 7.84099  | 25.52241 | 24.07809 | Pt | 0 | 0 | 0.00000 |
| HETATM | 389 | Pt | 7.84175  | 8.77714  | 24.07580 | Pt | 0 | 0 | 0.00000 |
| HETATM | 390 | Pt | 7.84008  | 17.14967 | 24.06998 | Pt | 0 | 0 | 0.00000 |
| HETATM | 391 | Pt | 15.09262 | 29.71115 | 24.07577 | Pt | 0 | 0 | 0.00000 |
| HETATM | 392 | Pt | 15.09127 | 12.95996 | 24.06455 | Pt | 0 | 0 | 0.00000 |
| HETATM | 393 | Pt | 15.09291 | 21.33666 | 24.07415 | Pt | 0 | 0 | 0.00000 |
| HETATM | 394 | Pt | 0.58756  | 21.33742 | 24.07589 | Pt | 0 | 0 | 0.00000 |
| HETATM | 395 | Pt | 0.58815  | 4.59012  | 24.07601 | Pt | 0 | 0 | 0.00000 |
| HETATM | 396 | Pt | 0.58893  | 12.96313 | 24.07491 | Pt | 0 | 0 | 0.00000 |
| HETATM | 397 | Pt | 7.84098  | 28.31422 | 24.07190 | Pt | 0 | 0 | 0.00000 |
| HETATM | 398 | Pt | 7.84236  | 11.56721 | 24.06892 | Pt | 0 | 0 | 0.00000 |



|        |     |    |          |          |          |    |   |   |         |
|--------|-----|----|----------|----------|----------|----|---|---|---------|
| HETATM | 399 | Pt | 7.83975  | 19.94114 | 24.06791 | Pt | 0 | 0 | 0.00000 |
| HETATM | 400 | Pt | 15.09212 | 32.50268 | 24.07015 | Pt | 0 | 0 | 0.00000 |
| HETATM | 401 | Pt | 15.08763 | 15.75526 | 24.06790 | Pt | 0 | 0 | 0.00000 |
| HETATM | 402 | Pt | 15.09266 | 24.12814 | 24.06881 | Pt | 0 | 0 | 0.00000 |
| HETATM | 403 | Pt | 0.58686  | 24.12890 | 24.06973 | Pt | 0 | 0 | 0.00000 |
| HETATM | 404 | Pt | 0.58913  | 7.38075  | 24.06811 | Pt | 0 | 0 | 0.00000 |
| HETATM | 405 | Pt | 0.58876  | 15.75450 | 24.06907 | Pt | 0 | 0 | 0.00000 |
| HETATM | 406 | Pt | 3.80532  | 21.32778 | 26.35384 | Pt | 0 | 0 | 0.00000 |
| HETATM | 407 | Pt | 3.80618  | 4.58228  | 26.35583 | Pt | 0 | 0 | 0.00000 |
| HETATM | 408 | Pt | 3.80835  | 12.95348 | 26.35094 | Pt | 0 | 0 | 0.00000 |
| HETATM | 409 | Pt | 11.06068 | 25.51223 | 26.35559 | Pt | 0 | 0 | 0.00000 |
| HETATM | 410 | Pt | 11.06459 | 8.77380  | 26.35247 | Pt | 0 | 0 | 0.00000 |
| HETATM | 411 | Pt | 11.06544 | 17.13535 | 26.34631 | Pt | 0 | 0 | 0.00000 |
| HETATM | 412 | Pt | 18.30907 | 29.70346 | 26.35218 | Pt | 0 | 0 | 0.00000 |
| HETATM | 413 | Pt | 18.29490 | 12.96211 | 26.35221 | Pt | 0 | 0 | 0.00000 |
| HETATM | 414 | Pt | 18.31164 | 21.32934 | 26.34797 | Pt | 0 | 0 | 0.00000 |
| HETATM | 415 | Pt | 3.81929  | 24.12803 | 26.35589 | Pt | 0 | 0 | 0.00000 |
| HETATM | 416 | Pt | 3.82300  | 7.38216  | 26.35408 | Pt | 0 | 0 | 0.00000 |
| HETATM | 417 | Pt | 3.82203  | 15.75331 | 26.35158 | Pt | 0 | 0 | 0.00000 |
| HETATM | 418 | Pt | 11.07496 | 28.31472 | 26.35440 | Pt | 0 | 0 | 0.00000 |
| HETATM | 419 | Pt | 11.06830 | 11.55782 | 26.30843 | Pt | 0 | 0 | 0.00000 |
| HETATM | 420 | Pt | 11.07815 | 19.93306 | 26.35977 | Pt | 0 | 0 | 0.00000 |
| HETATM | 421 | Pt | 18.32161 | 32.50540 | 26.35382 | Pt | 0 | 0 | 0.00000 |
| HETATM | 422 | Pt | 18.32199 | 15.75396 | 26.33732 | Pt | 0 | 0 | 0.00000 |
| HETATM | 423 | Pt | 18.32593 | 24.12831 | 26.35130 | Pt | 0 | 0 | 0.00000 |
| HETATM | 424 | Pt | 3.80497  | 26.92833 | 26.35538 | Pt | 0 | 0 | 0.00000 |
| HETATM | 425 | Pt | 3.80868  | 10.18169 | 26.35084 | Pt | 0 | 0 | 0.00000 |
| HETATM | 426 | Pt | 3.80586  | 18.55408 | 26.35307 | Pt | 0 | 0 | 0.00000 |
| HETATM | 427 | Pt | 11.05972 | 31.11605 | 26.35035 | Pt | 0 | 0 | 0.00000 |
| HETATM | 428 | Pt | 11.06805 | 14.36559 | 26.38037 | Pt | 0 | 0 | 0.00000 |
| HETATM | 429 | Pt | 11.06242 | 22.73400 | 26.35677 | Pt | 0 | 0 | 0.00000 |
| HETATM | 430 | Pt | 18.30719 | 35.30387 | 26.34990 | Pt | 0 | 0 | 0.00000 |
| HETATM | 431 | Pt | 18.30541 | 18.55529 | 26.34604 | Pt | 0 | 0 | 0.00000 |
| HETATM | 432 | Pt | 18.31034 | 26.92840 | 26.35254 | Pt | 0 | 0 | 0.00000 |
| HETATM | 433 | Pt | 6.22489  | 22.73874 | 26.35574 | Pt | 0 | 0 | 0.00000 |
| HETATM | 434 | Pt | 6.22578  | 5.99579  | 26.35535 | Pt | 0 | 0 | 0.00000 |
| HETATM | 435 | Pt | 6.22733  | 14.36546 | 26.35051 | Pt | 0 | 0 | 0.00000 |
| HETATM | 436 | Pt | 13.47679 | 26.92706 | 26.35376 | Pt | 0 | 0 | 0.00000 |
| HETATM | 437 | Pt | 13.47654 | 10.17811 | 26.32032 | Pt | 0 | 0 | 0.00000 |
| HETATM | 438 | Pt | 13.47713 | 18.54534 | 26.35177 | Pt | 0 | 0 | 0.00000 |
| HETATM | 439 | Pt | 20.72551 | 31.11596 | 26.35388 | Pt | 0 | 0 | 0.00000 |
| HETATM | 440 | Pt | 20.71962 | 14.36867 | 26.35593 | Pt | 0 | 0 | 0.00000 |
| HETATM | 441 | Pt | 20.72817 | 22.74127 | 26.35093 | Pt | 0 | 0 | 0.00000 |
| HETATM | 442 | Pt | 6.22406  | 25.51396 | 26.35536 | Pt | 0 | 0 | 0.00000 |
| HETATM | 443 | Pt | 6.22904  | 8.77027  | 26.35260 | Pt | 0 | 0 | 0.00000 |
| HETATM | 444 | Pt | 6.22289  | 17.14037 | 26.34762 | Pt | 0 | 0 | 0.00000 |
| HETATM | 445 | Pt | 13.47574 | 29.70470 | 26.35287 | Pt | 0 | 0 | 0.00000 |
| HETATM | 446 | Pt | 13.48684 | 12.96620 | 26.35081 | Pt | 0 | 0 | 0.00000 |
| HETATM | 447 | Pt | 13.48097 | 21.32185 | 26.35489 | Pt | 0 | 0 | 0.00000 |
| HETATM | 448 | Pt | 20.72359 | 33.89038 | 26.35168 | Pt | 0 | 0 | 0.00000 |
| HETATM | 449 | Pt | 20.72364 | 17.14332 | 26.35143 | Pt | 0 | 0 | 0.00000 |
| HETATM | 450 | Pt | 20.72797 | 25.51536 | 26.35199 | Pt | 0 | 0 | 0.00000 |
| HETATM | 451 | Pt | 6.23902  | 28.31513 | 26.35555 | Pt | 0 | 0 | 0.00000 |
| HETATM | 452 | Pt | 6.24181  | 11.56769 | 26.35481 | Pt | 0 | 0 | 0.00000 |
| HETATM | 453 | Pt | 6.23864  | 19.93992 | 26.35373 | Pt | 0 | 0 | 0.00000 |
| HETATM | 454 | Pt | 13.49358 | 32.50995 | 26.35488 | Pt | 0 | 0 | 0.00000 |
| HETATM | 455 | Pt | 13.48158 | 15.73957 | 26.36733 | Pt | 0 | 0 | 0.00000 |
| HETATM | 456 | Pt | 13.49301 | 24.12348 | 26.35456 | Pt | 0 | 0 | 0.00000 |
| HETATM | 457 | Pt | 20.73560 | 36.69257 | 26.35024 | Pt | 0 | 0 | 0.00000 |
| HETATM | 458 | Pt | 20.74251 | 19.94118 | 26.34912 | Pt | 0 | 0 | 0.00000 |
| HETATM | 459 | Pt | 20.74220 | 28.31576 | 26.35244 | Pt | 0 | 0 | 0.00000 |
| HETATM | 460 | Pt | 8.65825  | 24.12516 | 26.35531 | Pt | 0 | 0 | 0.00000 |
| HETATM | 461 | Pt | 8.65942  | 7.38359  | 26.35080 | Pt | 0 | 0 | 0.00000 |

|        |     |    |          |          |          |    |   |   |         |
|--------|-----|----|----------|----------|----------|----|---|---|---------|
| HETATM | 462 | Pt | 8.65592  | 15.75423 | 26.33938 | Pt | 0 | 0 | 0.00000 |
| HETATM | 463 | Pt | 15.90825 | 28.31583 | 26.35170 | Pt | 0 | 0 | 0.00000 |
| HETATM | 464 | Pt | 15.90439 | 11.56421 | 26.34622 | Pt | 0 | 0 | 0.00000 |
| HETATM | 465 | Pt | 15.91196 | 19.93763 | 26.34785 | Pt | 0 | 0 | 0.00000 |
| HETATM | 466 | Pt | 1.40193  | 19.94257 | 26.35348 | Pt | 0 | 0 | 0.00000 |
| HETATM | 467 | Pt | 1.39934  | 3.19449  | 26.35559 | Pt | 0 | 0 | 0.00000 |
| HETATM | 468 | Pt | 1.40509  | 11.56743 | 26.35184 | Pt | 0 | 0 | 0.00000 |
| HETATM | 469 | Pt | 8.64256  | 26.92648 | 26.35549 | Pt | 0 | 0 | 0.00000 |
| HETATM | 470 | Pt | 8.64992  | 10.18760 | 26.35574 | Pt | 0 | 0 | 0.00000 |
| HETATM | 471 | Pt | 8.64246  | 18.55325 | 26.34483 | Pt | 0 | 0 | 0.00000 |
| HETATM | 472 | Pt | 15.89212 | 31.11668 | 26.35462 | Pt | 0 | 0 | 0.00000 |
| HETATM | 473 | Pt | 15.87949 | 14.36127 | 26.33223 | Pt | 0 | 0 | 0.00000 |
| HETATM | 474 | Pt | 15.89418 | 22.74003 | 26.35031 | Pt | 0 | 0 | 0.00000 |
| HETATM | 475 | Pt | 1.38599  | 22.74256 | 26.35394 | Pt | 0 | 0 | 0.00000 |
| HETATM | 476 | Pt | 1.38762  | 5.99430  | 26.35373 | Pt | 0 | 0 | 0.00000 |
| HETATM | 477 | Pt | 1.38999  | 14.36733 | 26.35208 | Pt | 0 | 0 | 0.00000 |
| HETATM | 478 | Pt | 8.64305  | 29.70368 | 26.35558 | Pt | 0 | 0 | 0.00000 |
| HETATM | 479 | Pt | 8.64712  | 12.94917 | 26.35273 | Pt | 0 | 0 | 0.00000 |
| HETATM | 480 | Pt | 8.64311  | 21.32433 | 26.35476 | Pt | 0 | 0 | 0.00000 |
| HETATM | 481 | Pt | 15.88598 | 33.89253 | 26.35935 | Pt | 0 | 0 | 0.00000 |
| HETATM | 482 | Pt | 15.88841 | 17.13869 | 26.35602 | Pt | 0 | 0 | 0.00000 |
| HETATM | 483 | Pt | 15.89353 | 25.51497 | 26.35255 | Pt | 0 | 0 | 0.00000 |
| HETATM | 484 | Pt | 1.38529  | 25.51579 | 26.35459 | Pt | 0 | 0 | 0.00000 |
| HETATM | 485 | Pt | 1.39055  | 8.76796  | 26.35173 | Pt | 0 | 0 | 0.00000 |
| HETATM | 486 | Pt | 1.38869  | 17.14177 | 26.35298 | Pt | 0 | 0 | 0.00000 |
| HETATM | 487 | Pt | 2.20295  | 1.81641  | 28.71348 | Pt | 0 | 0 | 0.00000 |
| HETATM | 488 | Pt | 2.21551  | 10.18741 | 28.71221 | Pt | 0 | 0 | 0.00000 |
| HETATM | 489 | Pt | 2.20689  | 18.56471 | 28.71279 | Pt | 0 | 0 | 0.00000 |
| HETATM | 490 | Pt | 9.46444  | 6.00979  | 28.71738 | Pt | 0 | 0 | 0.00000 |
| HETATM | 491 | Pt | 9.45835  | 14.37930 | 28.67919 | Pt | 0 | 0 | 0.00000 |
| HETATM | 492 | Pt | 9.46743  | 22.74031 | 28.71322 | Pt | 0 | 0 | 0.00000 |
| HETATM | 493 | Pt | 16.70162 | 10.19389 | 28.70587 | Pt | 0 | 0 | 0.00000 |
| HETATM | 494 | Pt | 16.71481 | 18.55709 | 28.73793 | Pt | 0 | 0 | 0.00000 |
| HETATM | 495 | Pt | 16.71096 | 26.93689 | 28.71397 | Pt | 0 | 0 | 0.00000 |
| HETATM | 496 | Pt | 2.20721  | 21.32333 | 28.71552 | Pt | 0 | 0 | 0.00000 |
| HETATM | 497 | Pt | 2.20469  | 4.57435  | 28.71233 | Pt | 0 | 0 | 0.00000 |
| HETATM | 498 | Pt | 2.21461  | 12.94600 | 28.71193 | Pt | 0 | 0 | 0.00000 |
| HETATM | 499 | Pt | 9.46459  | 25.50267 | 28.71806 | Pt | 0 | 0 | 0.00000 |
| HETATM | 500 | Pt | 9.48472  | 8.77524  | 28.68954 | Pt | 0 | 0 | 0.00000 |
| HETATM | 501 | Pt | 9.50111  | 17.11950 | 28.68694 | Pt | 0 | 0 | 0.00000 |
| HETATM | 502 | Pt | 16.70874 | 29.69874 | 28.71553 | Pt | 0 | 0 | 0.00000 |
| HETATM | 503 | Pt | 16.62815 | 12.93094 | 28.72198 | Pt | 0 | 0 | 0.00000 |
| HETATM | 504 | Pt | 16.70886 | 21.31343 | 28.70268 | Pt | 0 | 0 | 0.00000 |
| HETATM | 505 | Pt | 2.17395  | 24.12996 | 28.71974 | Pt | 0 | 0 | 0.00000 |
| HETATM | 506 | Pt | 2.18047  | 7.37911  | 28.71499 | Pt | 0 | 0 | 0.00000 |
| HETATM | 507 | Pt | 2.18190  | 15.75482 | 28.71410 | Pt | 0 | 0 | 0.00000 |
| HETATM | 508 | Pt | 9.43474  | 28.31577 | 28.71323 | Pt | 0 | 0 | 0.00000 |
| HETATM | 509 | Pt | 9.49574  | 11.58840 | 28.77625 | Pt | 0 | 0 | 0.00000 |
| HETATM | 510 | Pt | 9.44414  | 19.93296 | 28.71649 | Pt | 0 | 0 | 0.00000 |
| HETATM | 511 | Pt | 16.66978 | 32.51412 | 28.71688 | Pt | 0 | 0 | 0.00000 |
| HETATM | 512 | Pt | 16.65342 | 15.67642 | 28.67131 | Pt | 0 | 0 | 0.00000 |
| HETATM | 513 | Pt | 16.68515 | 24.12419 | 28.71102 | Pt | 0 | 0 | 0.00000 |
| HETATM | 514 | Pt | 4.59589  | 3.19527  | 28.71725 | Pt | 0 | 0 | 0.00000 |
| HETATM | 515 | Pt | 4.60927  | 11.56732 | 28.71687 | Pt | 0 | 0 | 0.00000 |
| HETATM | 516 | Pt | 4.60130  | 19.93896 | 28.71707 | Pt | 0 | 0 | 0.00000 |
| HETATM | 517 | Pt | 11.85125 | 7.39790  | 28.68824 | Pt | 0 | 0 | 0.00000 |
| HETATM | 518 | Pt | 11.90407 | 15.66956 | 28.85219 | Pt | 0 | 0 | 0.00000 |
| HETATM | 519 | Pt | 11.85471 | 24.12079 | 28.71317 | Pt | 0 | 0 | 0.00000 |
| HETATM | 520 | Pt | 19.07514 | 11.59777 | 28.69746 | Pt | 0 | 0 | 0.00000 |
| HETATM | 521 | Pt | 19.10245 | 19.93312 | 28.70121 | Pt | 0 | 0 | 0.00000 |
| HETATM | 522 | Pt | 19.09985 | 28.31913 | 28.71194 | Pt | 0 | 0 | 0.00000 |
| HETATM | 523 | Pt | 4.62691  | 22.74716 | 28.71275 | Pt | 0 | 0 | 0.00000 |
| HETATM | 524 | Pt | 4.63016  | 6.00695  | 28.71859 | Pt | 0 | 0 | 0.00000 |

|        |     |    |          |          |          |    |   |   |         |
|--------|-----|----|----------|----------|----------|----|---|---|---------|
| HETATM | 525 | Pt | 4.63412  | 14.37039 | 28.70721 | Pt | 0 | 0 | 0.00000 |
| HETATM | 526 | Pt | 11.88085 | 26.93609 | 28.71704 | Pt | 0 | 0 | 0.00000 |
| HETATM | 527 | Pt | 11.87871 | 10.17087 | 28.61478 | Pt | 0 | 0 | 0.00000 |
| HETATM | 528 | Pt | 11.89049 | 18.54567 | 28.74006 | Pt | 0 | 0 | 0.00000 |
| HETATM | 529 | Pt | 19.12125 | 31.13200 | 28.71146 | Pt | 0 | 0 | 0.00000 |
| HETATM | 530 | Pt | 19.11110 | 14.37340 | 28.72581 | Pt | 0 | 0 | 0.00000 |
| HETATM | 531 | Pt | 19.13031 | 22.74645 | 28.71350 | Pt | 0 | 0 | 0.00000 |
| HETATM | 532 | Pt | 4.62574  | 25.50688 | 28.71642 | Pt | 0 | 0 | 0.00000 |
| HETATM | 533 | Pt | 4.63911  | 8.76773  | 28.70766 | Pt | 0 | 0 | 0.00000 |
| HETATM | 534 | Pt | 4.62599  | 17.13406 | 28.71280 | Pt | 0 | 0 | 0.00000 |
| HETATM | 535 | Pt | 11.87797 | 29.69914 | 28.71748 | Pt | 0 | 0 | 0.00000 |
| HETATM | 536 | Pt | 11.93558 | 12.94648 | 28.66865 | Pt | 0 | 0 | 0.00000 |
| HETATM | 537 | Pt | 11.89683 | 21.30525 | 28.72077 | Pt | 0 | 0 | 0.00000 |
| HETATM | 538 | Pt | 19.12275 | 33.89421 | 28.71871 | Pt | 0 | 0 | 0.00000 |
| HETATM | 539 | Pt | 19.08551 | 17.11374 | 28.68578 | Pt | 0 | 0 | 0.00000 |
| HETATM | 540 | Pt | 19.12998 | 25.50731 | 28.71350 | Pt | 0 | 0 | 0.00000 |
| HETATM | 541 | Pt | 7.04506  | 4.57526  | 28.71487 | Pt | 0 | 0 | 0.00000 |
| HETATM | 542 | Pt | 7.06877  | 12.94352 | 28.71626 | Pt | 0 | 0 | 0.00000 |
| HETATM | 543 | Pt | 7.04966  | 21.31167 | 28.71991 | Pt | 0 | 0 | 0.00000 |
| HETATM | 544 | Pt | 14.27677 | 8.79956  | 28.76629 | Pt | 0 | 0 | 0.00000 |
| HETATM | 545 | Pt | 14.26937 | 17.02934 | 28.71257 | Pt | 0 | 0 | 0.00000 |
| HETATM | 546 | Pt | 14.29544 | 25.50034 | 28.71444 | Pt | 0 | 0 | 0.00000 |
| HETATM | 547 | Pt | 21.53771 | 12.95288 | 28.71464 | Pt | 0 | 0 | 0.00000 |
| HETATM | 548 | Pt | 21.54742 | 21.31897 | 28.71024 | Pt | 0 | 0 | 0.00000 |
| HETATM | 549 | Pt | 21.54506 | 29.69716 | 28.71594 | Pt | 0 | 0 | 0.00000 |
| HETATM | 550 | Pt | 7.01776  | 24.12473 | 28.71566 | Pt | 0 | 0 | 0.00000 |
| HETATM | 551 | Pt | 7.02503  | 7.38674  | 28.71704 | Pt | 0 | 0 | 0.00000 |
| HETATM | 552 | Pt | 7.01447  | 15.75847 | 28.70884 | Pt | 0 | 0 | 0.00000 |
| HETATM | 553 | Pt | 14.26774 | 28.32116 | 28.70940 | Pt | 0 | 0 | 0.00000 |
| HETATM | 554 | Pt | 14.28513 | 11.57583 | 28.61196 | Pt | 0 | 0 | 0.00000 |
| HETATM | 555 | Pt | 14.27943 | 19.88105 | 28.69088 | Pt | 0 | 0 | 0.00000 |
| HETATM | 556 | Pt | 21.51272 | 32.50809 | 28.71484 | Pt | 0 | 0 | 0.00000 |
| HETATM | 557 | Pt | 21.50075 | 15.75966 | 28.71818 | Pt | 0 | 0 | 0.00000 |
| HETATM | 558 | Pt | 21.52091 | 24.12730 | 28.71305 | Pt | 0 | 0 | 0.00000 |
| HETATM | 559 | Pt | 7.04485  | 26.93527 | 28.71604 | Pt | 0 | 0 | 0.00000 |
| HETATM | 560 | Pt | 7.08114  | 10.19814 | 28.71391 | Pt | 0 | 0 | 0.00000 |
| HETATM | 561 | Pt | 7.06170  | 18.54935 | 28.70347 | Pt | 0 | 0 | 0.00000 |
| HETATM | 562 | Pt | 14.28817 | 31.14302 | 28.71454 | Pt | 0 | 0 | 0.00000 |
| HETATM | 563 | Pt | 14.32636 | 14.30311 | 29.82734 | Pt | 0 | 0 | 0.00000 |
| HETATM | 564 | Pt | 14.30100 | 22.73239 | 28.72116 | Pt | 0 | 0 | 0.00000 |
| HETATM | 565 | Pt | 21.53324 | 35.31775 | 28.70643 | Pt | 0 | 0 | 0.00000 |
| HETATM | 566 | Pt | 21.53729 | 18.55862 | 28.71889 | Pt | 0 | 0 | 0.00000 |
| HETATM | 567 | Pt | 21.54764 | 26.93637 | 28.71243 | Pt | 0 | 0 | 0.00000 |
| HETATM | 568 | O  | 3.00227  | 19.94094 | 29.83589 | O  | 0 | 0 | 0.00000 |
| HETATM | 569 | O  | 2.99791  | 3.19669  | 29.83550 | O  | 0 | 0 | 0.00000 |
| HETATM | 570 | O  | 3.00852  | 11.56786 | 29.83448 | O  | 0 | 0 | 0.00000 |
| HETATM | 571 | O  | 10.26498 | 24.11868 | 29.83589 | O  | 0 | 0 | 0.00000 |
| HETATM | 572 | O  | 10.27734 | 7.41021  | 29.82055 | O  | 0 | 0 | 0.00000 |
| HETATM | 573 | O  | 10.17720 | 15.74758 | 29.84510 | O  | 0 | 0 | 0.00000 |
| HETATM | 574 | O  | 17.50920 | 28.31752 | 29.83485 | O  | 0 | 0 | 0.00000 |
| HETATM | 575 | O  | 17.48072 | 11.59503 | 29.82283 | O  | 0 | 0 | 0.00000 |
| HETATM | 576 | O  | 17.51651 | 19.94531 | 29.83401 | O  | 0 | 0 | 0.00000 |
| HETATM | 577 | O  | 5.42245  | 24.12389 | 29.83600 | O  | 0 | 0 | 0.00000 |
| HETATM | 578 | O  | 5.42935  | 7.39278  | 29.83536 | O  | 0 | 0 | 0.00000 |
| HETATM | 579 | O  | 5.42795  | 15.74846 | 29.83125 | O  | 0 | 0 | 0.00000 |
| HETATM | 580 | O  | 12.68055 | 28.31820 | 29.83570 | O  | 0 | 0 | 0.00000 |
| HETATM | 581 | O  | 12.72449 | 13.46885 | 30.07672 | O  | 0 | 0 | 0.00000 |
| HETATM | 582 | O  | 12.70095 | 19.90731 | 29.83760 | O  | 0 | 0 | 0.00000 |
| HETATM | 583 | O  | 19.91855 | 32.50515 | 29.83585 | O  | 0 | 0 | 0.00000 |
| HETATM | 584 | O  | 19.89103 | 15.76141 | 29.83093 | O  | 0 | 0 | 0.00000 |
| HETATM | 585 | O  | 19.92737 | 24.12737 | 29.83442 | O  | 0 | 0 | 0.00000 |
| HETATM | 586 | O  | 7.84306  | 28.31666 | 29.83588 | O  | 0 | 0 | 0.00000 |
| HETATM | 587 | O  | 7.83316  | 11.57218 | 29.85236 | O  | 0 | 0 | 0.00000 |

|        |     |   |          |          |          |   |   |   |         |
|--------|-----|---|----------|----------|----------|---|---|---|---------|
| HETATM | 588 | O | 7.85201  | 19.92118 | 29.83422 | O | 0 | 0 | 0.00000 |
| HETATM | 589 | O | 15.09715 | 32.48800 | 29.85193 | O | 0 | 0 | 0.00000 |
| HETATM | 590 | O | 15.33419 | 16.08120 | 30.00840 | O | 0 | 0 | 0.00000 |
| HETATM | 591 | O | 15.09724 | 24.12502 | 29.83598 | O | 0 | 0 | 0.00000 |
| HETATM | 592 | O | 0.57015  | 24.13022 | 29.83461 | O | 0 | 0 | 0.00000 |
| HETATM | 593 | O | 0.58650  | 7.38382  | 29.83521 | O | 0 | 0 | 0.00000 |
| HETATM | 594 | O | 0.58832  | 15.75369 | 29.83517 | O | 0 | 0 | 0.00000 |

UNIT ENERGY kcal  
ENERGY -75115.055577  
END

XTLGRF 200

DESCRP FS

REMARK Pt111\_0.33ML\_9x9x7\_30.0\_vac fcc-displacement

FIXATOMS 1 162

CRYSTX 25.12092 25.12092 43.67409 90.00000 90.00000 60.00000

FORMAT ATOM (a6,lx,i5,lx,a5,lx,a3,lx,a1,lx,a5,3f10.5,lx,a5,i3,i2,lx,f8.5)

|        |    |    |          |          |          |    |   |   |         |
|--------|----|----|----------|----------|----------|----|---|---|---------|
| HETATM | 1  | Pt | 2.20033  | 1.79823  | 14.95718 | Pt | 0 | 0 | 0.00000 |
| HETATM | 2  | Pt | 2.20033  | 10.17187 | 14.95718 | Pt | 0 | 0 | 0.00000 |
| HETATM | 3  | Pt | 2.20033  | 18.54551 | 14.95718 | Pt | 0 | 0 | 0.00000 |
| HETATM | 4  | Pt | 9.45211  | 5.98505  | 14.95718 | Pt | 0 | 0 | 0.00000 |
| HETATM | 5  | Pt | 9.45211  | 14.35869 | 14.95718 | Pt | 0 | 0 | 0.00000 |
| HETATM | 6  | Pt | 9.45211  | 22.73233 | 14.95718 | Pt | 0 | 0 | 0.00000 |
| HETATM | 7  | Pt | 16.70390 | 10.17187 | 14.95718 | Pt | 0 | 0 | 0.00000 |
| HETATM | 8  | Pt | 16.70390 | 18.54551 | 14.95718 | Pt | 0 | 0 | 0.00000 |
| HETATM | 9  | Pt | 16.70390 | 26.91915 | 14.95718 | Pt | 0 | 0 | 0.00000 |
| HETATM | 10 | Pt | 2.20033  | 21.33672 | 14.95718 | Pt | 0 | 0 | 0.00000 |
| HETATM | 11 | Pt | 2.20033  | 4.58944  | 14.95718 | Pt | 0 | 0 | 0.00000 |
| HETATM | 12 | Pt | 2.20033  | 12.96308 | 14.95718 | Pt | 0 | 0 | 0.00000 |
| HETATM | 13 | Pt | 9.45211  | 25.52354 | 14.95718 | Pt | 0 | 0 | 0.00000 |
| HETATM | 14 | Pt | 9.45211  | 8.77626  | 14.95718 | Pt | 0 | 0 | 0.00000 |
| HETATM | 15 | Pt | 9.45211  | 17.14990 | 14.95718 | Pt | 0 | 0 | 0.00000 |
| HETATM | 16 | Pt | 16.70390 | 29.71036 | 14.95718 | Pt | 0 | 0 | 0.00000 |
| HETATM | 17 | Pt | 16.70390 | 12.96308 | 14.95718 | Pt | 0 | 0 | 0.00000 |
| HETATM | 18 | Pt | 16.70390 | 21.33672 | 14.95718 | Pt | 0 | 0 | 0.00000 |
| HETATM | 19 | Pt | 2.20033  | 24.12793 | 14.95718 | Pt | 0 | 0 | 0.00000 |
| HETATM | 20 | Pt | 2.20033  | 7.38065  | 14.95718 | Pt | 0 | 0 | 0.00000 |
| HETATM | 21 | Pt | 2.20033  | 15.75429 | 14.95718 | Pt | 0 | 0 | 0.00000 |
| HETATM | 22 | Pt | 9.45211  | 28.31475 | 14.95718 | Pt | 0 | 0 | 0.00000 |
| HETATM | 23 | Pt | 9.45211  | 11.56747 | 14.95718 | Pt | 0 | 0 | 0.00000 |
| HETATM | 24 | Pt | 9.45211  | 19.94111 | 14.95718 | Pt | 0 | 0 | 0.00000 |
| HETATM | 25 | Pt | 16.70390 | 32.50157 | 14.95718 | Pt | 0 | 0 | 0.00000 |
| HETATM | 26 | Pt | 16.70390 | 15.75429 | 14.95718 | Pt | 0 | 0 | 0.00000 |
| HETATM | 27 | Pt | 16.70390 | 24.12793 | 14.95718 | Pt | 0 | 0 | 0.00000 |
| HETATM | 28 | Pt | 4.61759  | 3.19384  | 14.95718 | Pt | 0 | 0 | 0.00000 |
| HETATM | 29 | Pt | 4.61759  | 11.56748 | 14.95718 | Pt | 0 | 0 | 0.00000 |
| HETATM | 30 | Pt | 4.61759  | 19.94112 | 14.95718 | Pt | 0 | 0 | 0.00000 |
| HETATM | 31 | Pt | 11.86937 | 7.38066  | 14.95718 | Pt | 0 | 0 | 0.00000 |
| HETATM | 32 | Pt | 11.86937 | 15.75430 | 14.95718 | Pt | 0 | 0 | 0.00000 |
| HETATM | 33 | Pt | 11.86937 | 24.12794 | 14.95718 | Pt | 0 | 0 | 0.00000 |
| HETATM | 34 | Pt | 19.12116 | 11.56748 | 14.95718 | Pt | 0 | 0 | 0.00000 |
| HETATM | 35 | Pt | 19.12116 | 19.94112 | 14.95718 | Pt | 0 | 0 | 0.00000 |
| HETATM | 36 | Pt | 19.12116 | 28.31476 | 14.95718 | Pt | 0 | 0 | 0.00000 |
| HETATM | 37 | Pt | 4.61759  | 22.73233 | 14.95718 | Pt | 0 | 0 | 0.00000 |
| HETATM | 38 | Pt | 4.61759  | 5.98505  | 14.95718 | Pt | 0 | 0 | 0.00000 |
| HETATM | 39 | Pt | 4.61759  | 14.35869 | 14.95718 | Pt | 0 | 0 | 0.00000 |
| HETATM | 40 | Pt | 11.86937 | 26.91915 | 14.95718 | Pt | 0 | 0 | 0.00000 |
| HETATM | 41 | Pt | 11.86937 | 10.17187 | 14.95718 | Pt | 0 | 0 | 0.00000 |
| HETATM | 42 | Pt | 11.86937 | 18.54551 | 14.95718 | Pt | 0 | 0 | 0.00000 |
| HETATM | 43 | Pt | 19.12116 | 31.10597 | 14.95718 | Pt | 0 | 0 | 0.00000 |
| HETATM | 44 | Pt | 19.12116 | 14.35869 | 14.95718 | Pt | 0 | 0 | 0.00000 |
| HETATM | 45 | Pt | 19.12116 | 22.73233 | 14.95718 | Pt | 0 | 0 | 0.00000 |
| HETATM | 46 | Pt | 4.61759  | 25.52354 | 14.95718 | Pt | 0 | 0 | 0.00000 |

|        |     |    |          |          |          |    |   |   |         |
|--------|-----|----|----------|----------|----------|----|---|---|---------|
| HETATM | 47  | Pt | 4.61759  | 8.77626  | 14.95718 | Pt | 0 | 0 | 0.00000 |
| HETATM | 48  | Pt | 4.61759  | 17.14990 | 14.95718 | Pt | 0 | 0 | 0.00000 |
| HETATM | 49  | Pt | 11.86937 | 29.71036 | 14.95718 | Pt | 0 | 0 | 0.00000 |
| HETATM | 50  | Pt | 11.86937 | 12.96308 | 14.95718 | Pt | 0 | 0 | 0.00000 |
| HETATM | 51  | Pt | 11.86937 | 21.33672 | 14.95718 | Pt | 0 | 0 | 0.00000 |
| HETATM | 52  | Pt | 19.12116 | 33.89718 | 14.95718 | Pt | 0 | 0 | 0.00000 |
| HETATM | 53  | Pt | 19.12116 | 17.14990 | 14.95718 | Pt | 0 | 0 | 0.00000 |
| HETATM | 54  | Pt | 19.12116 | 25.52354 | 14.95718 | Pt | 0 | 0 | 0.00000 |
| HETATM | 55  | Pt | 7.03485  | 4.58944  | 14.95718 | Pt | 0 | 0 | 0.00000 |
| HETATM | 56  | Pt | 7.03485  | 12.96308 | 14.95718 | Pt | 0 | 0 | 0.00000 |
| HETATM | 57  | Pt | 7.03485  | 21.33672 | 14.95718 | Pt | 0 | 0 | 0.00000 |
| HETATM | 58  | Pt | 14.28663 | 8.77626  | 14.95718 | Pt | 0 | 0 | 0.00000 |
| HETATM | 59  | Pt | 14.28663 | 17.14990 | 14.95718 | Pt | 0 | 0 | 0.00000 |
| HETATM | 60  | Pt | 14.28663 | 25.52354 | 14.95718 | Pt | 0 | 0 | 0.00000 |
| HETATM | 61  | Pt | 21.53842 | 12.96308 | 14.95718 | Pt | 0 | 0 | 0.00000 |
| HETATM | 62  | Pt | 21.53842 | 21.33672 | 14.95718 | Pt | 0 | 0 | 0.00000 |
| HETATM | 63  | Pt | 21.53842 | 29.71036 | 14.95718 | Pt | 0 | 0 | 0.00000 |
| HETATM | 64  | Pt | 7.03485  | 24.12793 | 14.95718 | Pt | 0 | 0 | 0.00000 |
| HETATM | 65  | Pt | 7.03485  | 7.38065  | 14.95718 | Pt | 0 | 0 | 0.00000 |
| HETATM | 66  | Pt | 7.03485  | 15.75429 | 14.95718 | Pt | 0 | 0 | 0.00000 |
| HETATM | 67  | Pt | 14.28663 | 28.31475 | 14.95718 | Pt | 0 | 0 | 0.00000 |
| HETATM | 68  | Pt | 14.28663 | 11.56747 | 14.95718 | Pt | 0 | 0 | 0.00000 |
| HETATM | 69  | Pt | 14.28663 | 19.94111 | 14.95718 | Pt | 0 | 0 | 0.00000 |
| HETATM | 70  | Pt | 21.53842 | 32.50157 | 14.95718 | Pt | 0 | 0 | 0.00000 |
| HETATM | 71  | Pt | 21.53842 | 15.75429 | 14.95718 | Pt | 0 | 0 | 0.00000 |
| HETATM | 72  | Pt | 21.53842 | 24.12793 | 14.95718 | Pt | 0 | 0 | 0.00000 |
| HETATM | 73  | Pt | 7.03485  | 26.91915 | 14.95718 | Pt | 0 | 0 | 0.00000 |
| HETATM | 74  | Pt | 7.03485  | 10.17187 | 14.95718 | Pt | 0 | 0 | 0.00000 |
| HETATM | 75  | Pt | 7.03485  | 18.54551 | 14.95718 | Pt | 0 | 0 | 0.00000 |
| HETATM | 76  | Pt | 14.28663 | 31.10597 | 14.95718 | Pt | 0 | 0 | 0.00000 |
| HETATM | 77  | Pt | 14.28663 | 14.35869 | 14.95718 | Pt | 0 | 0 | 0.00000 |
| HETATM | 78  | Pt | 14.28663 | 22.73233 | 14.95718 | Pt | 0 | 0 | 0.00000 |
| HETATM | 79  | Pt | 21.53842 | 35.29279 | 14.95718 | Pt | 0 | 0 | 0.00000 |
| HETATM | 80  | Pt | 21.53842 | 18.54551 | 14.95718 | Pt | 0 | 0 | 0.00000 |
| HETATM | 81  | Pt | 21.53842 | 26.91915 | 14.95718 | Pt | 0 | 0 | 0.00000 |
| HETATM | 82  | Pt | 3.00608  | 19.94112 | 17.23620 | Pt | 0 | 0 | 0.00000 |
| HETATM | 83  | Pt | 3.00608  | 3.19384  | 17.23620 | Pt | 0 | 0 | 0.00000 |
| HETATM | 84  | Pt | 3.00608  | 11.56748 | 17.23620 | Pt | 0 | 0 | 0.00000 |
| HETATM | 85  | Pt | 10.25786 | 24.12794 | 17.23620 | Pt | 0 | 0 | 0.00000 |
| HETATM | 86  | Pt | 10.25786 | 7.38066  | 17.23620 | Pt | 0 | 0 | 0.00000 |
| HETATM | 87  | Pt | 10.25786 | 15.75430 | 17.23620 | Pt | 0 | 0 | 0.00000 |
| HETATM | 88  | Pt | 17.50965 | 28.31476 | 17.23620 | Pt | 0 | 0 | 0.00000 |
| HETATM | 89  | Pt | 17.50965 | 11.56748 | 17.23620 | Pt | 0 | 0 | 0.00000 |
| HETATM | 90  | Pt | 17.50965 | 19.94112 | 17.23620 | Pt | 0 | 0 | 0.00000 |
| HETATM | 91  | Pt | 3.00608  | 22.73233 | 17.23620 | Pt | 0 | 0 | 0.00000 |
| HETATM | 92  | Pt | 3.00608  | 5.98505  | 17.23620 | Pt | 0 | 0 | 0.00000 |
| HETATM | 93  | Pt | 3.00608  | 14.35869 | 17.23620 | Pt | 0 | 0 | 0.00000 |
| HETATM | 94  | Pt | 10.25786 | 26.91915 | 17.23620 | Pt | 0 | 0 | 0.00000 |
| HETATM | 95  | Pt | 10.25786 | 10.17187 | 17.23620 | Pt | 0 | 0 | 0.00000 |
| HETATM | 96  | Pt | 10.25786 | 18.54551 | 17.23620 | Pt | 0 | 0 | 0.00000 |
| HETATM | 97  | Pt | 17.50965 | 31.10597 | 17.23620 | Pt | 0 | 0 | 0.00000 |
| HETATM | 98  | Pt | 17.50965 | 14.35869 | 17.23620 | Pt | 0 | 0 | 0.00000 |
| HETATM | 99  | Pt | 17.50965 | 22.73233 | 17.23620 | Pt | 0 | 0 | 0.00000 |
| HETATM | 100 | Pt | 3.00608  | 25.52354 | 17.23620 | Pt | 0 | 0 | 0.00000 |
| HETATM | 101 | Pt | 3.00608  | 8.77626  | 17.23620 | Pt | 0 | 0 | 0.00000 |
| HETATM | 102 | Pt | 3.00608  | 17.14990 | 17.23620 | Pt | 0 | 0 | 0.00000 |
| HETATM | 103 | Pt | 10.25786 | 29.71036 | 17.23620 | Pt | 0 | 0 | 0.00000 |
| HETATM | 104 | Pt | 10.25786 | 12.96308 | 17.23620 | Pt | 0 | 0 | 0.00000 |
| HETATM | 105 | Pt | 10.25786 | 21.33672 | 17.23620 | Pt | 0 | 0 | 0.00000 |
| HETATM | 106 | Pt | 17.50965 | 33.89718 | 17.23620 | Pt | 0 | 0 | 0.00000 |
| HETATM | 107 | Pt | 17.50965 | 17.14990 | 17.23620 | Pt | 0 | 0 | 0.00000 |
| HETATM | 108 | Pt | 17.50965 | 25.52354 | 17.23620 | Pt | 0 | 0 | 0.00000 |
| HETATM | 109 | Pt | 5.42334  | 21.33672 | 17.23620 | Pt | 0 | 0 | 0.00000 |

|        |     |    |          |          |          |    |   |   |         |
|--------|-----|----|----------|----------|----------|----|---|---|---------|
| HETATM | 110 | Pt | 5.42334  | 4.58944  | 17.23620 | Pt | 0 | 0 | 0.00000 |
| HETATM | 111 | Pt | 5.42334  | 12.96308 | 17.23620 | Pt | 0 | 0 | 0.00000 |
| HETATM | 112 | Pt | 12.67512 | 25.52354 | 17.23620 | Pt | 0 | 0 | 0.00000 |
| HETATM | 113 | Pt | 12.67512 | 8.77626  | 17.23620 | Pt | 0 | 0 | 0.00000 |
| HETATM | 114 | Pt | 12.67512 | 17.14990 | 17.23620 | Pt | 0 | 0 | 0.00000 |
| HETATM | 115 | Pt | 19.92691 | 29.71036 | 17.23620 | Pt | 0 | 0 | 0.00000 |
| HETATM | 116 | Pt | 19.92691 | 12.96308 | 17.23620 | Pt | 0 | 0 | 0.00000 |
| HETATM | 117 | Pt | 19.92691 | 21.33672 | 17.23620 | Pt | 0 | 0 | 0.00000 |
| HETATM | 118 | Pt | 5.42334  | 24.12793 | 17.23620 | Pt | 0 | 0 | 0.00000 |
| HETATM | 119 | Pt | 5.42334  | 7.38065  | 17.23620 | Pt | 0 | 0 | 0.00000 |
| HETATM | 120 | Pt | 5.42334  | 15.75429 | 17.23620 | Pt | 0 | 0 | 0.00000 |
| HETATM | 121 | Pt | 12.67512 | 28.31475 | 17.23620 | Pt | 0 | 0 | 0.00000 |
| HETATM | 122 | Pt | 12.67512 | 11.56747 | 17.23620 | Pt | 0 | 0 | 0.00000 |
| HETATM | 123 | Pt | 12.67512 | 19.94111 | 17.23620 | Pt | 0 | 0 | 0.00000 |
| HETATM | 124 | Pt | 19.92691 | 32.50157 | 17.23620 | Pt | 0 | 0 | 0.00000 |
| HETATM | 125 | Pt | 19.92691 | 15.75429 | 17.23620 | Pt | 0 | 0 | 0.00000 |
| HETATM | 126 | Pt | 19.92691 | 24.12793 | 17.23620 | Pt | 0 | 0 | 0.00000 |
| HETATM | 127 | Pt | 5.42334  | 26.91915 | 17.23620 | Pt | 0 | 0 | 0.00000 |
| HETATM | 128 | Pt | 5.42334  | 10.17187 | 17.23620 | Pt | 0 | 0 | 0.00000 |
| HETATM | 129 | Pt | 5.42334  | 18.54551 | 17.23620 | Pt | 0 | 0 | 0.00000 |
| HETATM | 130 | Pt | 12.67512 | 31.10597 | 17.23620 | Pt | 0 | 0 | 0.00000 |
| HETATM | 131 | Pt | 12.67512 | 14.35869 | 17.23620 | Pt | 0 | 0 | 0.00000 |
| HETATM | 132 | Pt | 12.67512 | 22.73233 | 17.23620 | Pt | 0 | 0 | 0.00000 |
| HETATM | 133 | Pt | 19.92691 | 35.29279 | 17.23620 | Pt | 0 | 0 | 0.00000 |
| HETATM | 134 | Pt | 19.92691 | 18.54551 | 17.23620 | Pt | 0 | 0 | 0.00000 |
| HETATM | 135 | Pt | 19.92691 | 26.91915 | 17.23620 | Pt | 0 | 0 | 0.00000 |
| HETATM | 136 | Pt | 7.84060  | 22.73233 | 17.23620 | Pt | 0 | 0 | 0.00000 |
| HETATM | 137 | Pt | 7.84060  | 5.98505  | 17.23620 | Pt | 0 | 0 | 0.00000 |
| HETATM | 138 | Pt | 7.84060  | 14.35869 | 17.23620 | Pt | 0 | 0 | 0.00000 |
| HETATM | 139 | Pt | 15.09238 | 26.91915 | 17.23620 | Pt | 0 | 0 | 0.00000 |
| HETATM | 140 | Pt | 15.09238 | 10.17187 | 17.23620 | Pt | 0 | 0 | 0.00000 |
| HETATM | 141 | Pt | 15.09238 | 18.54551 | 17.23620 | Pt | 0 | 0 | 0.00000 |
| HETATM | 142 | Pt | 0.58881  | 18.54551 | 17.23620 | Pt | 0 | 0 | 0.00000 |
| HETATM | 143 | Pt | 0.58881  | 1.79823  | 17.23620 | Pt | 0 | 0 | 0.00000 |
| HETATM | 144 | Pt | 0.58881  | 10.17187 | 17.23620 | Pt | 0 | 0 | 0.00000 |
| HETATM | 145 | Pt | 7.84060  | 25.52354 | 17.23620 | Pt | 0 | 0 | 0.00000 |
| HETATM | 146 | Pt | 7.84060  | 8.77626  | 17.23620 | Pt | 0 | 0 | 0.00000 |
| HETATM | 147 | Pt | 7.84060  | 17.14990 | 17.23620 | Pt | 0 | 0 | 0.00000 |
| HETATM | 148 | Pt | 15.09238 | 29.71036 | 17.23620 | Pt | 0 | 0 | 0.00000 |
| HETATM | 149 | Pt | 15.09238 | 12.96308 | 17.23620 | Pt | 0 | 0 | 0.00000 |
| HETATM | 150 | Pt | 15.09238 | 21.33672 | 17.23620 | Pt | 0 | 0 | 0.00000 |
| HETATM | 151 | Pt | 0.58881  | 21.33672 | 17.23620 | Pt | 0 | 0 | 0.00000 |
| HETATM | 152 | Pt | 0.58881  | 4.58944  | 17.23620 | Pt | 0 | 0 | 0.00000 |
| HETATM | 153 | Pt | 0.58881  | 12.96308 | 17.23620 | Pt | 0 | 0 | 0.00000 |
| HETATM | 154 | Pt | 7.84060  | 28.31475 | 17.23620 | Pt | 0 | 0 | 0.00000 |
| HETATM | 155 | Pt | 7.84060  | 11.56747 | 17.23620 | Pt | 0 | 0 | 0.00000 |
| HETATM | 156 | Pt | 7.84060  | 19.94111 | 17.23620 | Pt | 0 | 0 | 0.00000 |
| HETATM | 157 | Pt | 15.09238 | 32.50157 | 17.23620 | Pt | 0 | 0 | 0.00000 |
| HETATM | 158 | Pt | 15.09238 | 15.75429 | 17.23620 | Pt | 0 | 0 | 0.00000 |
| HETATM | 159 | Pt | 15.09238 | 24.12793 | 17.23620 | Pt | 0 | 0 | 0.00000 |
| HETATM | 160 | Pt | 0.58881  | 24.12793 | 17.23620 | Pt | 0 | 0 | 0.00000 |
| HETATM | 161 | Pt | 0.58881  | 7.38065  | 17.23620 | Pt | 0 | 0 | 0.00000 |
| HETATM | 162 | Pt | 0.58881  | 15.75429 | 17.23620 | Pt | 0 | 0 | 0.00000 |
| HETATM | 163 | Pt | 3.81173  | 21.33744 | 19.51541 | Pt | 0 | 0 | 0.00000 |
| HETATM | 164 | Pt | 3.81196  | 4.58917  | 19.51598 | Pt | 0 | 0 | 0.00000 |
| HETATM | 165 | Pt | 3.81163  | 12.96258 | 19.51467 | Pt | 0 | 0 | 0.00000 |
| HETATM | 166 | Pt | 11.06347 | 25.52304 | 19.51613 | Pt | 0 | 0 | 0.00000 |
| HETATM | 167 | Pt | 11.06343 | 8.77565  | 19.51358 | Pt | 0 | 0 | 0.00000 |
| HETATM | 168 | Pt | 11.06405 | 17.14982 | 19.51609 | Pt | 0 | 0 | 0.00000 |
| HETATM | 169 | Pt | 18.31545 | 29.71039 | 19.51528 | Pt | 0 | 0 | 0.00000 |
| HETATM | 170 | Pt | 18.31553 | 12.96316 | 19.51374 | Pt | 0 | 0 | 0.00000 |
| HETATM | 171 | Pt | 18.31516 | 21.33705 | 19.51451 | Pt | 0 | 0 | 0.00000 |
| HETATM | 172 | Pt | 3.81184  | 24.12857 | 19.51594 | Pt | 0 | 0 | 0.00000 |

|        |     |    |          |          |          |    |   |   |         |
|--------|-----|----|----------|----------|----------|----|---|---|---------|
| HETATM | 173 | Pt | 3.81208  | 7.38009  | 19.51546 | Pt | 0 | 0 | 0.00000 |
| HETATM | 174 | Pt | 3.81165  | 15.75434 | 19.51481 | Pt | 0 | 0 | 0.00000 |
| HETATM | 175 | Pt | 11.06346 | 28.31413 | 19.51585 | Pt | 0 | 0 | 0.00000 |
| HETATM | 176 | Pt | 11.06396 | 11.56840 | 19.51403 | Pt | 0 | 0 | 0.00000 |
| HETATM | 177 | Pt | 11.06396 | 19.94083 | 19.51606 | Pt | 0 | 0 | 0.00000 |
| HETATM | 178 | Pt | 18.31569 | 32.50154 | 19.51504 | Pt | 0 | 0 | 0.00000 |
| HETATM | 179 | Pt | 18.31424 | 15.75445 | 19.51474 | Pt | 0 | 0 | 0.00000 |
| HETATM | 180 | Pt | 18.31537 | 24.12824 | 19.51502 | Pt | 0 | 0 | 0.00000 |
| HETATM | 181 | Pt | 3.81181  | 26.91938 | 19.51629 | Pt | 0 | 0 | 0.00000 |
| HETATM | 182 | Pt | 3.81184  | 10.17121 | 19.51488 | Pt | 0 | 0 | 0.00000 |
| HETATM | 183 | Pt | 3.81154  | 18.54613 | 19.51503 | Pt | 0 | 0 | 0.00000 |
| HETATM | 184 | Pt | 11.06313 | 31.10515 | 19.51514 | Pt | 0 | 0 | 0.00000 |
| HETATM | 185 | Pt | 11.06374 | 14.35975 | 19.51526 | Pt | 0 | 0 | 0.00000 |
| HETATM | 186 | Pt | 11.06353 | 22.73193 | 19.51640 | Pt | 0 | 0 | 0.00000 |
| HETATM | 187 | Pt | 18.31631 | 35.29285 | 19.51407 | Pt | 0 | 0 | 0.00000 |
| HETATM | 188 | Pt | 18.31480 | 18.54588 | 19.51429 | Pt | 0 | 0 | 0.00000 |
| HETATM | 189 | Pt | 18.31540 | 26.91937 | 19.51526 | Pt | 0 | 0 | 0.00000 |
| HETATM | 190 | Pt | 6.22891  | 22.73293 | 19.51570 | Pt | 0 | 0 | 0.00000 |
| HETATM | 191 | Pt | 6.22914  | 5.98447  | 19.51596 | Pt | 0 | 0 | 0.00000 |
| HETATM | 192 | Pt | 6.22856  | 14.35844 | 19.51365 | Pt | 0 | 0 | 0.00000 |
| HETATM | 193 | Pt | 13.48063 | 26.91910 | 19.51552 | Pt | 0 | 0 | 0.00000 |
| HETATM | 194 | Pt | 13.48105 | 10.17134 | 19.51215 | Pt | 0 | 0 | 0.00000 |
| HETATM | 195 | Pt | 13.48085 | 18.54575 | 19.51589 | Pt | 0 | 0 | 0.00000 |
| HETATM | 196 | Pt | 20.73277 | 31.10621 | 19.51539 | Pt | 0 | 0 | 0.00000 |
| HETATM | 197 | Pt | 20.73250 | 14.35906 | 19.51486 | Pt | 0 | 0 | 0.00000 |
| HETATM | 198 | Pt | 20.73268 | 22.73236 | 19.51487 | Pt | 0 | 0 | 0.00000 |
| HETATM | 199 | Pt | 6.22909  | 25.52358 | 19.51635 | Pt | 0 | 0 | 0.00000 |
| HETATM | 200 | Pt | 6.22931  | 8.77555  | 19.51522 | Pt | 0 | 0 | 0.00000 |
| HETATM | 201 | Pt | 6.22847  | 17.15034 | 19.51372 | Pt | 0 | 0 | 0.00000 |
| HETATM | 202 | Pt | 13.48060 | 29.70990 | 19.51525 | Pt | 0 | 0 | 0.00000 |
| HETATM | 203 | Pt | 13.48075 | 12.96381 | 19.51436 | Pt | 0 | 0 | 0.00000 |
| HETATM | 204 | Pt | 13.48050 | 21.33685 | 19.51580 | Pt | 0 | 0 | 0.00000 |
| HETATM | 205 | Pt | 20.73309 | 33.89737 | 19.51505 | Pt | 0 | 0 | 0.00000 |
| HETATM | 206 | Pt | 20.73211 | 17.14986 | 19.51482 | Pt | 0 | 0 | 0.00000 |
| HETATM | 207 | Pt | 20.73268 | 25.52356 | 19.51520 | Pt | 0 | 0 | 0.00000 |
| HETATM | 208 | Pt | 6.22920  | 28.31445 | 19.51639 | Pt | 0 | 0 | 0.00000 |
| HETATM | 209 | Pt | 6.22901  | 11.56675 | 19.51425 | Pt | 0 | 0 | 0.00000 |
| HETATM | 210 | Pt | 6.22887  | 19.94183 | 19.51466 | Pt | 0 | 0 | 0.00000 |
| HETATM | 211 | Pt | 13.48063 | 32.50074 | 19.51410 | Pt | 0 | 0 | 0.00000 |
| HETATM | 212 | Pt | 13.48060 | 15.75469 | 19.51660 | Pt | 0 | 0 | 0.00000 |
| HETATM | 213 | Pt | 13.48060 | 24.12805 | 19.51556 | Pt | 0 | 0 | 0.00000 |
| HETATM | 214 | Pt | 20.73316 | 36.68891 | 19.51499 | Pt | 0 | 0 | 0.00000 |
| HETATM | 215 | Pt | 20.73269 | 19.94105 | 19.51459 | Pt | 0 | 0 | 0.00000 |
| HETATM | 216 | Pt | 20.73280 | 28.31490 | 19.51533 | Pt | 0 | 0 | 0.00000 |
| HETATM | 217 | Pt | 8.64644  | 24.12758 | 19.51643 | Pt | 0 | 0 | 0.00000 |
| HETATM | 218 | Pt | 8.64621  | 7.37976  | 19.51503 | Pt | 0 | 0 | 0.00000 |
| HETATM | 219 | Pt | 8.64619  | 15.75472 | 19.51375 | Pt | 0 | 0 | 0.00000 |
| HETATM | 220 | Pt | 15.89812 | 28.31481 | 19.51527 | Pt | 0 | 0 | 0.00000 |
| HETATM | 221 | Pt | 15.89883 | 11.56712 | 19.51231 | Pt | 0 | 0 | 0.00000 |
| HETATM | 222 | Pt | 15.89762 | 19.94171 | 19.51477 | Pt | 0 | 0 | 0.00000 |
| HETATM | 223 | Pt | 1.39469  | 19.94159 | 19.51541 | Pt | 0 | 0 | 0.00000 |
| HETATM | 224 | Pt | 1.39469  | 3.19396  | 19.51555 | Pt | 0 | 0 | 0.00000 |
| HETATM | 225 | Pt | 1.39463  | 11.56717 | 19.51494 | Pt | 0 | 0 | 0.00000 |
| HETATM | 226 | Pt | 8.64632  | 26.91865 | 19.51636 | Pt | 0 | 0 | 0.00000 |
| HETATM | 227 | Pt | 8.64660  | 10.17194 | 19.51454 | Pt | 0 | 0 | 0.00000 |
| HETATM | 228 | Pt | 8.64649  | 18.54555 | 19.51478 | Pt | 0 | 0 | 0.00000 |
| HETATM | 229 | Pt | 15.89808 | 31.10582 | 19.51508 | Pt | 0 | 0 | 0.00000 |
| HETATM | 230 | Pt | 15.89700 | 14.35895 | 19.51504 | Pt | 0 | 0 | 0.00000 |
| HETATM | 231 | Pt | 15.89774 | 22.73292 | 19.51491 | Pt | 0 | 0 | 0.00000 |
| HETATM | 232 | Pt | 1.39481  | 22.73298 | 19.51534 | Pt | 0 | 0 | 0.00000 |
| HETATM | 233 | Pt | 1.39455  | 5.98477  | 19.51529 | Pt | 0 | 0 | 0.00000 |
| HETATM | 234 | Pt | 1.39451  | 14.35873 | 19.51511 | Pt | 0 | 0 | 0.00000 |
| HETATM | 235 | Pt | 8.64622  | 29.70961 | 19.51615 | Pt | 0 | 0 | 0.00000 |

|        |     |    |          |          |          |    |   |   |         |
|--------|-----|----|----------|----------|----------|----|---|---|---------|
| HETATM | 236 | Pt | 8.64626  | 12.96337 | 19.51391 | Pt | 0 | 0 | 0.00000 |
| HETATM | 237 | Pt | 8.64634  | 21.33669 | 19.51563 | Pt | 0 | 0 | 0.00000 |
| HETATM | 238 | Pt | 15.89854 | 33.89667 | 19.51379 | Pt | 0 | 0 | 0.00000 |
| HETATM | 239 | Pt | 15.89731 | 17.15023 | 19.51506 | Pt | 0 | 0 | 0.00000 |
| HETATM | 240 | Pt | 15.89792 | 25.52380 | 19.51520 | Pt | 0 | 0 | 0.00000 |
| HETATM | 241 | Pt | 1.39451  | 25.52406 | 19.51588 | Pt | 0 | 0 | 0.00000 |
| HETATM | 242 | Pt | 1.39467  | 8.77578  | 19.51491 | Pt | 0 | 0 | 0.00000 |
| HETATM | 243 | Pt | 1.39454  | 17.15012 | 19.51531 | Pt | 0 | 0 | 0.00000 |
| HETATM | 244 | Pt | 2.19967  | 1.79839  | 21.79605 | Pt | 0 | 0 | 0.00000 |
| HETATM | 245 | Pt | 2.20004  | 10.17061 | 21.79351 | Pt | 0 | 0 | 0.00000 |
| HETATM | 246 | Pt | 2.19965  | 18.54567 | 21.79441 | Pt | 0 | 0 | 0.00000 |
| HETATM | 247 | Pt | 9.45191  | 5.98369  | 21.79555 | Pt | 0 | 0 | 0.00000 |
| HETATM | 248 | Pt | 9.45113  | 14.35925 | 21.79170 | Pt | 0 | 0 | 0.00000 |
| HETATM | 249 | Pt | 9.45202  | 22.73062 | 21.79661 | Pt | 0 | 0 | 0.00000 |
| HETATM | 250 | Pt | 16.70529 | 10.17092 | 21.79016 | Pt | 0 | 0 | 0.00000 |
| HETATM | 251 | Pt | 16.70227 | 18.54611 | 21.79254 | Pt | 0 | 0 | 0.00000 |
| HETATM | 252 | Pt | 16.70366 | 26.91883 | 21.79425 | Pt | 0 | 0 | 0.00000 |
| HETATM | 253 | Pt | 2.19971  | 21.33833 | 21.79466 | Pt | 0 | 0 | 0.00000 |
| HETATM | 254 | Pt | 2.20023  | 4.59009  | 21.79521 | Pt | 0 | 0 | 0.00000 |
| HETATM | 255 | Pt | 2.19977  | 12.96321 | 21.79348 | Pt | 0 | 0 | 0.00000 |
| HETATM | 256 | Pt | 9.45219  | 25.52296 | 21.79652 | Pt | 0 | 0 | 0.00000 |
| HETATM | 257 | Pt | 9.45149  | 8.77512  | 21.79153 | Pt | 0 | 0 | 0.00000 |
| HETATM | 258 | Pt | 9.45245  | 17.14902 | 21.79340 | Pt | 0 | 0 | 0.00000 |
| HETATM | 259 | Pt | 16.70363 | 29.71092 | 21.79425 | Pt | 0 | 0 | 0.00000 |
| HETATM | 260 | Pt | 16.70326 | 12.96305 | 21.78957 | Pt | 0 | 0 | 0.00000 |
| HETATM | 261 | Pt | 16.70312 | 21.33827 | 21.79276 | Pt | 0 | 0 | 0.00000 |
| HETATM | 262 | Pt | 2.20048  | 24.12908 | 21.79537 | Pt | 0 | 0 | 0.00000 |
| HETATM | 263 | Pt | 2.20117  | 7.38010  | 21.79419 | Pt | 0 | 0 | 0.00000 |
| HETATM | 264 | Pt | 2.20077  | 15.75443 | 21.79397 | Pt | 0 | 0 | 0.00000 |
| HETATM | 265 | Pt | 9.45300  | 28.31380 | 21.79613 | Pt | 0 | 0 | 0.00000 |
| HETATM | 266 | Pt | 9.45338  | 11.56902 | 21.79198 | Pt | 0 | 0 | 0.00000 |
| HETATM | 267 | Pt | 9.45260  | 19.94058 | 21.79410 | Pt | 0 | 0 | 0.00000 |
| HETATM | 268 | Pt | 16.70452 | 32.50138 | 21.79358 | Pt | 0 | 0 | 0.00000 |
| HETATM | 269 | Pt | 16.70073 | 15.75474 | 21.79397 | Pt | 0 | 0 | 0.00000 |
| HETATM | 270 | Pt | 16.70438 | 24.12855 | 21.79381 | Pt | 0 | 0 | 0.00000 |
| HETATM | 271 | Pt | 4.61837  | 3.19397  | 21.79646 | Pt | 0 | 0 | 0.00000 |
| HETATM | 272 | Pt | 4.61796  | 11.56636 | 21.79302 | Pt | 0 | 0 | 0.00000 |
| HETATM | 273 | Pt | 4.61750  | 19.94235 | 21.79392 | Pt | 0 | 0 | 0.00000 |
| HETATM | 274 | Pt | 11.86915 | 7.37926  | 21.79234 | Pt | 0 | 0 | 0.00000 |
| HETATM | 275 | Pt | 11.87040 | 15.75417 | 21.79830 | Pt | 0 | 0 | 0.00000 |
| HETATM | 276 | Pt | 11.87014 | 24.12689 | 21.79602 | Pt | 0 | 0 | 0.00000 |
| HETATM | 277 | Pt | 19.12209 | 11.56835 | 21.79274 | Pt | 0 | 0 | 0.00000 |
| HETATM | 278 | Pt | 19.12151 | 19.94147 | 21.79219 | Pt | 0 | 0 | 0.00000 |
| HETATM | 279 | Pt | 19.12193 | 28.31496 | 21.79434 | Pt | 0 | 0 | 0.00000 |
| HETATM | 280 | Pt | 4.61674  | 22.73295 | 21.79543 | Pt | 0 | 0 | 0.00000 |
| HETATM | 281 | Pt | 4.61766  | 5.98416  | 21.79567 | Pt | 0 | 0 | 0.00000 |
| HETATM | 282 | Pt | 4.61674  | 14.35738 | 21.79269 | Pt | 0 | 0 | 0.00000 |
| HETATM | 283 | Pt | 11.86924 | 26.91772 | 21.79558 | Pt | 0 | 0 | 0.00000 |
| HETATM | 284 | Pt | 11.86963 | 10.17123 | 21.78826 | Pt | 0 | 0 | 0.00000 |
| HETATM | 285 | Pt | 11.87017 | 18.54391 | 21.79629 | Pt | 0 | 0 | 0.00000 |
| HETATM | 286 | Pt | 19.12082 | 31.10559 | 21.79436 | Pt | 0 | 0 | 0.00000 |
| HETATM | 287 | Pt | 19.11974 | 14.35878 | 21.79190 | Pt | 0 | 0 | 0.00000 |
| HETATM | 288 | Pt | 19.12088 | 22.73212 | 21.79324 | Pt | 0 | 0 | 0.00000 |
| HETATM | 289 | Pt | 4.61717  | 25.52465 | 21.79638 | Pt | 0 | 0 | 0.00000 |
| HETATM | 290 | Pt | 4.61766  | 8.77604  | 21.79426 | Pt | 0 | 0 | 0.00000 |
| HETATM | 291 | Pt | 4.61654  | 17.15099 | 21.79291 | Pt | 0 | 0 | 0.00000 |
| HETATM | 292 | Pt | 11.86908 | 29.70994 | 21.79481 | Pt | 0 | 0 | 0.00000 |
| HETATM | 293 | Pt | 11.86936 | 12.96642 | 21.79364 | Pt | 0 | 0 | 0.00000 |
| HETATM | 294 | Pt | 11.86909 | 21.33592 | 21.79680 | Pt | 0 | 0 | 0.00000 |
| HETATM | 295 | Pt | 19.12121 | 33.89778 | 21.79337 | Pt | 0 | 0 | 0.00000 |
| HETATM | 296 | Pt | 19.11884 | 17.15074 | 21.79246 | Pt | 0 | 0 | 0.00000 |
| HETATM | 297 | Pt | 19.12094 | 25.52433 | 21.79417 | Pt | 0 | 0 | 0.00000 |
| HETATM | 298 | Pt | 7.03493  | 4.58948  | 21.79642 | Pt | 0 | 0 | 0.00000 |



|        |     |    |          |          |          |    |   |   |         |
|--------|-----|----|----------|----------|----------|----|---|---|---------|
| HETATM | 299 | Pt | 7.03365  | 12.96233 | 21.79093 | Pt | 0 | 0 | 0.00000 |
| HETATM | 300 | Pt | 7.03382  | 21.33815 | 21.79421 | Pt | 0 | 0 | 0.00000 |
| HETATM | 301 | Pt | 14.28637 | 8.77529  | 21.78989 | Pt | 0 | 0 | 0.00000 |
| HETATM | 302 | Pt | 14.28581 | 17.15090 | 21.79626 | Pt | 0 | 0 | 0.00000 |
| HETATM | 303 | Pt | 14.28622 | 25.52405 | 21.79461 | Pt | 0 | 0 | 0.00000 |
| HETATM | 304 | Pt | 21.53727 | 12.96478 | 21.79501 | Pt | 0 | 0 | 0.00000 |
| HETATM | 305 | Pt | 21.53829 | 21.33700 | 21.79320 | Pt | 0 | 0 | 0.00000 |
| HETATM | 306 | Pt | 21.53812 | 29.71125 | 21.79452 | Pt | 0 | 0 | 0.00000 |
| HETATM | 307 | Pt | 7.03542  | 24.12803 | 21.79628 | Pt | 0 | 0 | 0.00000 |
| HETATM | 308 | Pt | 7.03564  | 7.37985  | 21.79506 | Pt | 0 | 0 | 0.00000 |
| HETATM | 309 | Pt | 7.03385  | 15.75426 | 21.78958 | Pt | 0 | 0 | 0.00000 |
| HETATM | 310 | Pt | 14.28728 | 28.31450 | 21.79449 | Pt | 0 | 0 | 0.00000 |
| HETATM | 311 | Pt | 14.28827 | 11.56647 | 21.78655 | Pt | 0 | 0 | 0.00000 |
| HETATM | 312 | Pt | 14.28672 | 19.94154 | 21.79519 | Pt | 0 | 0 | 0.00000 |
| HETATM | 313 | Pt | 21.53894 | 32.50212 | 21.79451 | Pt | 0 | 0 | 0.00000 |
| HETATM | 314 | Pt | 21.53886 | 15.75485 | 21.79357 | Pt | 0 | 0 | 0.00000 |
| HETATM | 315 | Pt | 21.53910 | 24.12778 | 21.79383 | Pt | 0 | 0 | 0.00000 |
| HETATM | 316 | Pt | 7.03490  | 26.91841 | 21.79665 | Pt | 0 | 0 | 0.00000 |
| HETATM | 317 | Pt | 7.03511  | 10.17048 | 21.79319 | Pt | 0 | 0 | 0.00000 |
| HETATM | 318 | Pt | 7.03370  | 18.54587 | 21.79132 | Pt | 0 | 0 | 0.00000 |
| HETATM | 319 | Pt | 14.28611 | 31.10484 | 21.79376 | Pt | 0 | 0 | 0.00000 |
| HETATM | 320 | Pt | 14.28401 | 14.35875 | 21.79688 | Pt | 0 | 0 | 0.00000 |
| HETATM | 321 | Pt | 14.28601 | 22.73205 | 21.79455 | Pt | 0 | 0 | 0.00000 |
| HETATM | 322 | Pt | 21.53827 | 35.29313 | 21.79375 | Pt | 0 | 0 | 0.00000 |
| HETATM | 323 | Pt | 21.53765 | 18.54476 | 21.79350 | Pt | 0 | 0 | 0.00000 |
| HETATM | 324 | Pt | 21.53816 | 26.91874 | 21.79427 | Pt | 0 | 0 | 0.00000 |
| HETATM | 325 | Pt | 3.00465  | 19.94239 | 24.06935 | Pt | 0 | 0 | 0.00000 |
| HETATM | 326 | Pt | 3.00583  | 3.19469  | 24.07193 | Pt | 0 | 0 | 0.00000 |
| HETATM | 327 | Pt | 3.00562  | 11.56673 | 24.06747 | Pt | 0 | 0 | 0.00000 |
| HETATM | 328 | Pt | 10.25917 | 24.12524 | 24.07237 | Pt | 0 | 0 | 0.00000 |
| HETATM | 329 | Pt | 10.25953 | 7.38150  | 24.07102 | Pt | 0 | 0 | 0.00000 |
| HETATM | 330 | Pt | 10.26063 | 15.74769 | 24.07289 | Pt | 0 | 0 | 0.00000 |
| HETATM | 331 | Pt | 17.50988 | 28.31486 | 24.06899 | Pt | 0 | 0 | 0.00000 |
| HETATM | 332 | Pt | 17.50889 | 11.56838 | 24.06538 | Pt | 0 | 0 | 0.00000 |
| HETATM | 333 | Pt | 17.50948 | 19.94246 | 24.06500 | Pt | 0 | 0 | 0.00000 |
| HETATM | 334 | Pt | 3.00465  | 22.73384 | 24.07701 | Pt | 0 | 0 | 0.00000 |
| HETATM | 335 | Pt | 3.00672  | 5.98544  | 24.07704 | Pt | 0 | 0 | 0.00000 |
| HETATM | 336 | Pt | 3.00557  | 14.35803 | 24.07403 | Pt | 0 | 0 | 0.00000 |
| HETATM | 337 | Pt | 10.25898 | 26.91773 | 24.07806 | Pt | 0 | 0 | 0.00000 |
| HETATM | 338 | Pt | 10.25704 | 10.16761 | 24.06370 | Pt | 0 | 0 | 0.00000 |
| HETATM | 339 | Pt | 10.25794 | 18.54397 | 24.07208 | Pt | 0 | 0 | 0.00000 |
| HETATM | 340 | Pt | 17.50918 | 31.10619 | 24.07553 | Pt | 0 | 0 | 0.00000 |
| HETATM | 341 | Pt | 17.50543 | 14.35934 | 24.06784 | Pt | 0 | 0 | 0.00000 |
| HETATM | 342 | Pt | 17.50985 | 22.73310 | 24.07367 | Pt | 0 | 0 | 0.00000 |
| HETATM | 343 | Pt | 3.00511  | 25.52462 | 24.07802 | Pt | 0 | 0 | 0.00000 |
| HETATM | 344 | Pt | 3.00666  | 8.77584  | 24.07495 | Pt | 0 | 0 | 0.00000 |
| HETATM | 345 | Pt | 3.00527  | 17.15045 | 24.07490 | Pt | 0 | 0 | 0.00000 |
| HETATM | 346 | Pt | 10.25884 | 29.71008 | 24.07704 | Pt | 0 | 0 | 0.00000 |
| HETATM | 347 | Pt | 10.25871 | 12.97053 | 24.07357 | Pt | 0 | 0 | 0.00000 |
| HETATM | 348 | Pt | 10.25856 | 21.33309 | 24.07947 | Pt | 0 | 0 | 0.00000 |
| HETATM | 349 | Pt | 17.50883 | 33.89694 | 24.07398 | Pt | 0 | 0 | 0.00000 |
| HETATM | 350 | Pt | 17.50439 | 17.15086 | 24.07189 | Pt | 0 | 0 | 0.00000 |
| HETATM | 351 | Pt | 17.50979 | 25.52385 | 24.07536 | Pt | 0 | 0 | 0.00000 |
| HETATM | 352 | Pt | 5.42202  | 21.33798 | 24.07635 | Pt | 0 | 0 | 0.00000 |
| HETATM | 353 | Pt | 5.42432  | 4.59016  | 24.07857 | Pt | 0 | 0 | 0.00000 |
| HETATM | 354 | Pt | 5.42279  | 12.96098 | 24.07326 | Pt | 0 | 0 | 0.00000 |
| HETATM | 355 | Pt | 12.67591 | 25.52173 | 24.07734 | Pt | 0 | 0 | 0.00000 |
| HETATM | 356 | Pt | 12.67332 | 8.77421  | 24.06743 | Pt | 0 | 0 | 0.00000 |
| HETATM | 357 | Pt | 12.67840 | 17.14623 | 24.08215 | Pt | 0 | 0 | 0.00000 |
| HETATM | 358 | Pt | 19.92672 | 29.71081 | 24.07568 | Pt | 0 | 0 | 0.00000 |
| HETATM | 359 | Pt | 19.92285 | 12.96546 | 24.07588 | Pt | 0 | 0 | 0.00000 |
| HETATM | 360 | Pt | 19.92735 | 21.33683 | 24.07299 | Pt | 0 | 0 | 0.00000 |
| HETATM | 361 | Pt | 5.42297  | 24.12840 | 24.07218 | Pt | 0 | 0 | 0.00000 |

|        |     |    |          |          |          |    |   |   |         |
|--------|-----|----|----------|----------|----------|----|---|---|---------|
| HETATM | 362 | Pt | 5.42444  | 7.38098  | 24.07063 | Pt | 0 | 0 | 0.00000 |
| HETATM | 363 | Pt | 5.42199  | 15.75361 | 24.06522 | Pt | 0 | 0 | 0.00000 |
| HETATM | 364 | Pt | 12.67580 | 28.31399 | 24.07016 | Pt | 0 | 0 | 0.00000 |
| HETATM | 365 | Pt | 12.67920 | 11.57080 | 24.05618 | Pt | 0 | 0 | 0.00000 |
| HETATM | 366 | Pt | 12.67546 | 19.93766 | 24.07386 | Pt | 0 | 0 | 0.00000 |
| HETATM | 367 | Pt | 19.92590 | 32.50208 | 24.06913 | Pt | 0 | 0 | 0.00000 |
| HETATM | 368 | Pt | 19.92647 | 15.75536 | 24.06460 | Pt | 0 | 0 | 0.00000 |
| HETATM | 369 | Pt | 19.92710 | 24.12800 | 24.06843 | Pt | 0 | 0 | 0.00000 |
| HETATM | 370 | Pt | 5.42376  | 26.91968 | 24.07856 | Pt | 0 | 0 | 0.00000 |
| HETATM | 371 | Pt | 5.42406  | 10.17158 | 24.07465 | Pt | 0 | 0 | 0.00000 |
| HETATM | 372 | Pt | 5.42160  | 18.54702 | 24.07310 | Pt | 0 | 0 | 0.00000 |
| HETATM | 373 | Pt | 12.67595 | 31.10567 | 24.07543 | Pt | 0 | 0 | 0.00000 |
| HETATM | 374 | Pt | 12.67229 | 14.36052 | 24.08926 | Pt | 0 | 0 | 0.00000 |
| HETATM | 375 | Pt | 12.67607 | 22.72950 | 24.07800 | Pt | 0 | 0 | 0.00000 |
| HETATM | 376 | Pt | 19.92607 | 35.29382 | 24.07283 | Pt | 0 | 0 | 0.00000 |
| HETATM | 377 | Pt | 19.92535 | 18.54542 | 24.07272 | Pt | 0 | 0 | 0.00000 |
| HETATM | 378 | Pt | 19.92697 | 26.91935 | 24.07556 | Pt | 0 | 0 | 0.00000 |
| HETATM | 379 | Pt | 7.84078  | 22.73175 | 24.07773 | Pt | 0 | 0 | 0.00000 |
| HETATM | 380 | Pt | 7.84209  | 5.98568  | 24.07779 | Pt | 0 | 0 | 0.00000 |
| HETATM | 381 | Pt | 7.83704  | 14.35659 | 24.06656 | Pt | 0 | 0 | 0.00000 |
| HETATM | 382 | Pt | 15.09263 | 26.91883 | 24.07558 | Pt | 0 | 0 | 0.00000 |
| HETATM | 383 | Pt | 15.09534 | 10.16916 | 24.06403 | Pt | 0 | 0 | 0.00000 |
| HETATM | 384 | Pt | 15.09170 | 18.54632 | 24.07657 | Pt | 0 | 0 | 0.00000 |
| HETATM | 385 | Pt | 0.58794  | 18.54632 | 24.07602 | Pt | 0 | 0 | 0.00000 |
| HETATM | 386 | Pt | 0.58675  | 1.79925  | 24.07737 | Pt | 0 | 0 | 0.00000 |
| HETATM | 387 | Pt | 0.58902  | 10.17140 | 24.07446 | Pt | 0 | 0 | 0.00000 |
| HETATM | 388 | Pt | 7.84147  | 25.52294 | 24.07850 | Pt | 0 | 0 | 0.00000 |
| HETATM | 389 | Pt | 7.84157  | 8.77660  | 24.07552 | Pt | 0 | 0 | 0.00000 |
| HETATM | 390 | Pt | 7.83883  | 17.15036 | 24.06605 | Pt | 0 | 0 | 0.00000 |
| HETATM | 391 | Pt | 15.09258 | 29.71022 | 24.07546 | Pt | 0 | 0 | 0.00000 |
| HETATM | 392 | Pt | 15.09169 | 12.95968 | 24.06625 | Pt | 0 | 0 | 0.00000 |
| HETATM | 393 | Pt | 15.09262 | 21.33674 | 24.07492 | Pt | 0 | 0 | 0.00000 |
| HETATM | 394 | Pt | 0.58762  | 21.33810 | 24.07551 | Pt | 0 | 0 | 0.00000 |
| HETATM | 395 | Pt | 0.58867  | 4.59014  | 24.07540 | Pt | 0 | 0 | 0.00000 |
| HETATM | 396 | Pt | 0.58867  | 12.96286 | 24.07499 | Pt | 0 | 0 | 0.00000 |
| HETATM | 397 | Pt | 7.84188  | 28.31491 | 24.07260 | Pt | 0 | 0 | 0.00000 |
| HETATM | 398 | Pt | 7.84166  | 11.56587 | 24.06584 | Pt | 0 | 0 | 0.00000 |
| HETATM | 399 | Pt | 7.83855  | 19.94232 | 24.06654 | Pt | 0 | 0 | 0.00000 |
| HETATM | 400 | Pt | 15.09193 | 32.50119 | 24.06796 | Pt | 0 | 0 | 0.00000 |
| HETATM | 401 | Pt | 15.08365 | 15.75499 | 24.07615 | Pt | 0 | 0 | 0.00000 |
| HETATM | 402 | Pt | 15.09262 | 24.12778 | 24.06913 | Pt | 0 | 0 | 0.00000 |
| HETATM | 403 | Pt | 0.58675  | 24.12968 | 24.06968 | Pt | 0 | 0 | 0.00000 |
| HETATM | 404 | Pt | 0.58905  | 7.38035  | 24.06793 | Pt | 0 | 0 | 0.00000 |
| HETATM | 405 | Pt | 0.58867  | 15.75455 | 24.06917 | Pt | 0 | 0 | 0.00000 |
| HETATM | 406 | Pt | 3.80491  | 21.32875 | 26.35366 | Pt | 0 | 0 | 0.00000 |
| HETATM | 407 | Pt | 3.80796  | 4.58298  | 26.35612 | Pt | 0 | 0 | 0.00000 |
| HETATM | 408 | Pt | 3.80719  | 12.95294 | 26.35018 | Pt | 0 | 0 | 0.00000 |
| HETATM | 409 | Pt | 11.06071 | 25.51207 | 26.35571 | Pt | 0 | 0 | 0.00000 |
| HETATM | 410 | Pt | 11.06873 | 8.77796  | 26.36156 | Pt | 0 | 0 | 0.00000 |
| HETATM | 411 | Pt | 11.05773 | 17.13936 | 26.33740 | Pt | 0 | 0 | 0.00000 |
| HETATM | 412 | Pt | 18.30936 | 29.70284 | 26.35232 | Pt | 0 | 0 | 0.00000 |
| HETATM | 413 | Pt | 18.29437 | 12.96131 | 26.35247 | Pt | 0 | 0 | 0.00000 |
| HETATM | 414 | Pt | 18.31174 | 21.32887 | 26.34818 | Pt | 0 | 0 | 0.00000 |
| HETATM | 415 | Pt | 3.81974  | 24.12876 | 26.35616 | Pt | 0 | 0 | 0.00000 |
| HETATM | 416 | Pt | 3.82399  | 7.38239  | 26.35428 | Pt | 0 | 0 | 0.00000 |
| HETATM | 417 | Pt | 3.82050  | 15.75349 | 26.34973 | Pt | 0 | 0 | 0.00000 |
| HETATM | 418 | Pt | 11.07543 | 28.31505 | 26.35446 | Pt | 0 | 0 | 0.00000 |
| HETATM | 419 | Pt | 11.06599 | 11.55600 | 26.30620 | Pt | 0 | 0 | 0.00000 |
| HETATM | 420 | Pt | 11.07705 | 19.93231 | 26.36172 | Pt | 0 | 0 | 0.00000 |
| HETATM | 421 | Pt | 18.32221 | 32.50465 | 26.35277 | Pt | 0 | 0 | 0.00000 |
| HETATM | 422 | Pt | 18.32519 | 15.75432 | 26.33511 | Pt | 0 | 0 | 0.00000 |
| HETATM | 423 | Pt | 18.32582 | 24.12791 | 26.35178 | Pt | 0 | 0 | 0.00000 |
| HETATM | 424 | Pt | 3.80625  | 26.92893 | 26.35568 | Pt | 0 | 0 | 0.00000 |

|        |     |    |          |          |          |    |   |   |         |
|--------|-----|----|----------|----------|----------|----|---|---|---------|
| HETATM | 425 | Pt | 3.80847  | 10.18155 | 26.35039 | Pt | 0 | 0 | 0.00000 |
| HETATM | 426 | Pt | 3.80420  | 18.55514 | 26.35231 | Pt | 0 | 0 | 0.00000 |
| HETATM | 427 | Pt | 11.06071 | 31.11728 | 26.35198 | Pt | 0 | 0 | 0.00000 |
| HETATM | 428 | Pt | 11.07403 | 14.35780 | 26.40678 | Pt | 0 | 0 | 0.00000 |
| HETATM | 429 | Pt | 11.06200 | 22.73377 | 26.35684 | Pt | 0 | 0 | 0.00000 |
| HETATM | 430 | Pt | 18.30768 | 35.30312 | 26.34625 | Pt | 0 | 0 | 0.00000 |
| HETATM | 431 | Pt | 18.30624 | 18.55493 | 26.34620 | Pt | 0 | 0 | 0.00000 |
| HETATM | 432 | Pt | 18.31027 | 26.92783 | 26.35299 | Pt | 0 | 0 | 0.00000 |
| HETATM | 433 | Pt | 6.22489  | 22.73942 | 26.35590 | Pt | 0 | 0 | 0.00000 |
| HETATM | 434 | Pt | 6.22755  | 5.99704  | 26.35611 | Pt | 0 | 0 | 0.00000 |
| HETATM | 435 | Pt | 6.22496  | 14.36524 | 26.34707 | Pt | 0 | 0 | 0.00000 |
| HETATM | 436 | Pt | 13.47664 | 26.92620 | 26.35372 | Pt | 0 | 0 | 0.00000 |
| HETATM | 437 | Pt | 13.47672 | 10.17626 | 26.31982 | Pt | 0 | 0 | 0.00000 |
| HETATM | 438 | Pt | 13.47573 | 18.54416 | 26.36000 | Pt | 0 | 0 | 0.00000 |
| HETATM | 439 | Pt | 20.72557 | 31.11592 | 26.35369 | Pt | 0 | 0 | 0.00000 |
| HETATM | 440 | Pt | 20.72039 | 14.36837 | 26.35511 | Pt | 0 | 0 | 0.00000 |
| HETATM | 441 | Pt | 20.72821 | 22.74072 | 26.35114 | Pt | 0 | 0 | 0.00000 |
| HETATM | 442 | Pt | 6.22490  | 25.51479 | 26.35595 | Pt | 0 | 0 | 0.00000 |
| HETATM | 443 | Pt | 6.22946  | 8.77072  | 26.35267 | Pt | 0 | 0 | 0.00000 |
| HETATM | 444 | Pt | 6.21959  | 17.14180 | 26.34415 | Pt | 0 | 0 | 0.00000 |
| HETATM | 445 | Pt | 13.47594 | 29.70341 | 26.35312 | Pt | 0 | 0 | 0.00000 |
| HETATM | 446 | Pt | 13.49141 | 12.96974 | 26.35254 | Pt | 0 | 0 | 0.00000 |
| HETATM | 447 | Pt | 13.48078 | 21.32099 | 26.35614 | Pt | 0 | 0 | 0.00000 |
| HETATM | 448 | Pt | 20.72366 | 33.89065 | 26.35114 | Pt | 0 | 0 | 0.00000 |
| HETATM | 449 | Pt | 20.72582 | 17.14329 | 26.35019 | Pt | 0 | 0 | 0.00000 |
| HETATM | 450 | Pt | 20.72772 | 25.51489 | 26.35238 | Pt | 0 | 0 | 0.00000 |
| HETATM | 451 | Pt | 6.24049  | 28.31612 | 26.35622 | Pt | 0 | 0 | 0.00000 |
| HETATM | 452 | Pt | 6.24025  | 11.56709 | 26.35391 | Pt | 0 | 0 | 0.00000 |
| HETATM | 453 | Pt | 6.23680  | 19.94113 | 26.35323 | Pt | 0 | 0 | 0.00000 |
| HETATM | 454 | Pt | 13.49418 | 32.50665 | 26.35309 | Pt | 0 | 0 | 0.00000 |
| HETATM | 455 | Pt | 13.47491 | 15.73978 | 26.39732 | Pt | 0 | 0 | 0.00000 |
| HETATM | 456 | Pt | 13.49281 | 24.12266 | 26.35477 | Pt | 0 | 0 | 0.00000 |
| HETATM | 457 | Pt | 20.73532 | 36.69252 | 26.35022 | Pt | 0 | 0 | 0.00000 |
| HETATM | 458 | Pt | 20.74319 | 19.94088 | 26.34904 | Pt | 0 | 0 | 0.00000 |
| HETATM | 459 | Pt | 20.74201 | 28.31545 | 26.35268 | Pt | 0 | 0 | 0.00000 |
| HETATM | 460 | Pt | 8.65850  | 24.12554 | 26.35555 | Pt | 0 | 0 | 0.00000 |
| HETATM | 461 | Pt | 8.66172  | 7.38599  | 26.35276 | Pt | 0 | 0 | 0.00000 |
| HETATM | 462 | Pt | 8.65204  | 15.75540 | 26.32813 | Pt | 0 | 0 | 0.00000 |
| HETATM | 463 | Pt | 15.90825 | 28.31478 | 26.35186 | Pt | 0 | 0 | 0.00000 |
| HETATM | 464 | Pt | 15.90160 | 11.56065 | 26.34537 | Pt | 0 | 0 | 0.00000 |
| HETATM | 465 | Pt | 15.91147 | 19.93837 | 26.34932 | Pt | 0 | 0 | 0.00000 |
| HETATM | 466 | Pt | 1.40148  | 19.94336 | 26.35301 | Pt | 0 | 0 | 0.00000 |
| HETATM | 467 | Pt | 1.40130  | 3.19464  | 26.35480 | Pt | 0 | 0 | 0.00000 |
| HETATM | 468 | Pt | 1.40461  | 11.56687 | 26.35178 | Pt | 0 | 0 | 0.00000 |
| HETATM | 469 | Pt | 8.64329  | 26.92720 | 26.35612 | Pt | 0 | 0 | 0.00000 |
| HETATM | 470 | Pt | 8.64869  | 10.18687 | 26.35456 | Pt | 0 | 0 | 0.00000 |
| HETATM | 471 | Pt | 8.63819  | 18.55524 | 26.34089 | Pt | 0 | 0 | 0.00000 |
| HETATM | 472 | Pt | 15.89250 | 31.11473 | 26.35359 | Pt | 0 | 0 | 0.00000 |
| HETATM | 473 | Pt | 15.87926 | 14.36252 | 26.33582 | Pt | 0 | 0 | 0.00000 |
| HETATM | 474 | Pt | 15.89423 | 22.73985 | 26.35109 | Pt | 0 | 0 | 0.00000 |
| HETATM | 475 | Pt | 1.38595  | 22.74342 | 26.35359 | Pt | 0 | 0 | 0.00000 |
| HETATM | 476 | Pt | 1.38917  | 5.99443  | 26.35333 | Pt | 0 | 0 | 0.00000 |
| HETATM | 477 | Pt | 1.38933  | 14.36693 | 26.35206 | Pt | 0 | 0 | 0.00000 |
| HETATM | 478 | Pt | 8.64434  | 29.70522 | 26.35661 | Pt | 0 | 0 | 0.00000 |
| HETATM | 479 | Pt | 8.64253  | 12.94692 | 26.34182 | Pt | 0 | 0 | 0.00000 |
| HETATM | 480 | Pt | 8.64230  | 21.32490 | 26.35495 | Pt | 0 | 0 | 0.00000 |
| HETATM | 481 | Pt | 15.88649 | 33.88868 | 26.35323 | Pt | 0 | 0 | 0.00000 |
| HETATM | 482 | Pt | 15.88655 | 17.13955 | 26.35701 | Pt | 0 | 0 | 0.00000 |
| HETATM | 483 | Pt | 15.89337 | 25.51442 | 26.35292 | Pt | 0 | 0 | 0.00000 |
| HETATM | 484 | Pt | 1.38606  | 25.51629 | 26.35465 | Pt | 0 | 0 | 0.00000 |
| HETATM | 485 | Pt | 1.39093  | 8.76753  | 26.35150 | Pt | 0 | 0 | 0.00000 |
| HETATM | 486 | Pt | 1.38805  | 17.14214 | 26.35296 | Pt | 0 | 0 | 0.00000 |
| HETATM | 487 | Pt | 2.20526  | 1.81647  | 28.71448 | Pt | 0 | 0 | 0.00000 |

|        |     |    |          |          |          |    |   |   |         |
|--------|-----|----|----------|----------|----------|----|---|---|---------|
| HETATM | 488 | Pt | 2.21723  | 10.18716 | 28.71153 | Pt | 0 | 0 | 0.00000 |
| HETATM | 489 | Pt | 2.20446  | 18.56615 | 28.71362 | Pt | 0 | 0 | 0.00000 |
| HETATM | 490 | Pt | 9.46585  | 6.01466  | 28.71942 | Pt | 0 | 0 | 0.00000 |
| HETATM | 491 | Pt | 9.44098  | 14.38397 | 28.64184 | Pt | 0 | 0 | 0.00000 |
| HETATM | 492 | Pt | 9.46696  | 22.73989 | 28.71404 | Pt | 0 | 0 | 0.00000 |
| HETATM | 493 | Pt | 16.69671 | 10.18993 | 28.68848 | Pt | 0 | 0 | 0.00000 |
| HETATM | 494 | Pt | 16.72087 | 18.56228 | 28.73417 | Pt | 0 | 0 | 0.00000 |
| HETATM | 495 | Pt | 16.71074 | 26.93595 | 28.71456 | Pt | 0 | 0 | 0.00000 |
| HETATM | 496 | Pt | 2.20760  | 21.32406 | 28.71464 | Pt | 0 | 0 | 0.00000 |
| HETATM | 497 | Pt | 2.20733  | 4.57474  | 28.71209 | Pt | 0 | 0 | 0.00000 |
| HETATM | 498 | Pt | 2.21358  | 12.94475 | 28.71246 | Pt | 0 | 0 | 0.00000 |
| HETATM | 499 | Pt | 9.46443  | 25.50285 | 28.71876 | Pt | 0 | 0 | 0.00000 |
| HETATM | 500 | Pt | 9.49078  | 8.78257  | 28.69269 | Pt | 0 | 0 | 0.00000 |
| HETATM | 501 | Pt | 9.49498  | 17.11264 | 28.68132 | Pt | 0 | 0 | 0.00000 |
| HETATM | 502 | Pt | 16.70921 | 29.69724 | 28.71514 | Pt | 0 | 0 | 0.00000 |
| HETATM | 503 | Pt | 16.63400 | 12.92296 | 28.71289 | Pt | 0 | 0 | 0.00000 |
| HETATM | 504 | Pt | 16.71074 | 21.31597 | 28.70417 | Pt | 0 | 0 | 0.00000 |
| HETATM | 505 | Pt | 2.17507  | 24.12993 | 28.72013 | Pt | 0 | 0 | 0.00000 |
| HETATM | 506 | Pt | 2.18352  | 7.37978  | 28.71539 | Pt | 0 | 0 | 0.00000 |
| HETATM | 507 | Pt | 2.17952  | 15.75466 | 28.71297 | Pt | 0 | 0 | 0.00000 |
| HETATM | 508 | Pt | 9.43557  | 28.31767 | 28.71299 | Pt | 0 | 0 | 0.00000 |
| HETATM | 509 | Pt | 9.50005  | 11.60106 | 28.76891 | Pt | 0 | 0 | 0.00000 |
| HETATM | 510 | Pt | 9.44287  | 19.93169 | 28.71624 | Pt | 0 | 0 | 0.00000 |
| HETATM | 511 | Pt | 16.67261 | 32.51123 | 28.71467 | Pt | 0 | 0 | 0.00000 |
| HETATM | 512 | Pt | 16.67149 | 15.68716 | 28.66418 | Pt | 0 | 0 | 0.00000 |
| HETATM | 513 | Pt | 16.68505 | 24.12475 | 28.71211 | Pt | 0 | 0 | 0.00000 |
| HETATM | 514 | Pt | 4.59802  | 3.19599  | 28.71735 | Pt | 0 | 0 | 0.00000 |
| HETATM | 515 | Pt | 4.61074  | 11.56802 | 28.71744 | Pt | 0 | 0 | 0.00000 |
| HETATM | 516 | Pt | 4.60085  | 19.93862 | 28.71730 | Pt | 0 | 0 | 0.00000 |
| HETATM | 517 | Pt | 11.85388 | 7.39907  | 28.69044 | Pt | 0 | 0 | 0.00000 |
| HETATM | 518 | Pt | 11.93134 | 15.65135 | 28.94747 | Pt | 0 | 0 | 0.00000 |
| HETATM | 519 | Pt | 11.85415 | 24.12083 | 28.71353 | Pt | 0 | 0 | 0.00000 |
| HETATM | 520 | Pt | 19.07533 | 11.59249 | 28.69790 | Pt | 0 | 0 | 0.00000 |
| HETATM | 521 | Pt | 19.10657 | 19.93555 | 28.70164 | Pt | 0 | 0 | 0.00000 |
| HETATM | 522 | Pt | 19.09972 | 28.31801 | 28.71249 | Pt | 0 | 0 | 0.00000 |
| HETATM | 523 | Pt | 4.62754  | 22.74731 | 28.71304 | Pt | 0 | 0 | 0.00000 |
| HETATM | 524 | Pt | 4.63331  | 6.00868  | 28.71960 | Pt | 0 | 0 | 0.00000 |
| HETATM | 525 | Pt | 4.62829  | 14.36959 | 28.70461 | Pt | 0 | 0 | 0.00000 |
| HETATM | 526 | Pt | 11.87992 | 26.93615 | 28.71692 | Pt | 0 | 0 | 0.00000 |
| HETATM | 527 | Pt | 11.89100 | 10.17596 | 28.64517 | Pt | 0 | 0 | 0.00000 |
| HETATM | 528 | Pt | 11.88955 | 18.55290 | 28.75453 | Pt | 0 | 0 | 0.00000 |
| HETATM | 529 | Pt | 19.12219 | 31.13077 | 28.71192 | Pt | 0 | 0 | 0.00000 |
| HETATM | 530 | Pt | 19.11507 | 14.37163 | 28.72864 | Pt | 0 | 0 | 0.00000 |
| HETATM | 531 | Pt | 19.13118 | 22.74669 | 28.71317 | Pt | 0 | 0 | 0.00000 |
| HETATM | 532 | Pt | 4.62702  | 25.50716 | 28.71677 | Pt | 0 | 0 | 0.00000 |
| HETATM | 533 | Pt | 4.64195  | 8.76949  | 28.70705 | Pt | 0 | 0 | 0.00000 |
| HETATM | 534 | Pt | 4.61904  | 17.13620 | 28.71054 | Pt | 0 | 0 | 0.00000 |
| HETATM | 535 | Pt | 11.87821 | 29.69956 | 28.71842 | Pt | 0 | 0 | 0.00000 |
| HETATM | 536 | Pt | 11.97595 | 12.94132 | 28.69204 | Pt | 0 | 0 | 0.00000 |
| HETATM | 537 | Pt | 11.89619 | 21.30729 | 28.71992 | Pt | 0 | 0 | 0.00000 |
| HETATM | 538 | Pt | 19.12223 | 33.89310 | 28.71774 | Pt | 0 | 0 | 0.00000 |
| HETATM | 539 | Pt | 19.09441 | 17.11524 | 28.68661 | Pt | 0 | 0 | 0.00000 |
| HETATM | 540 | Pt | 19.12997 | 25.50688 | 28.71426 | Pt | 0 | 0 | 0.00000 |
| HETATM | 541 | Pt | 7.04676  | 4.57718  | 28.71582 | Pt | 0 | 0 | 0.00000 |
| HETATM | 542 | Pt | 7.06918  | 12.94714 | 28.71360 | Pt | 0 | 0 | 0.00000 |
| HETATM | 543 | Pt | 7.04898  | 21.31029 | 28.72042 | Pt | 0 | 0 | 0.00000 |
| HETATM | 544 | Pt | 14.28063 | 8.79024  | 28.75469 | Pt | 0 | 0 | 0.00000 |
| HETATM | 545 | Pt | 14.28857 | 17.03178 | 28.73037 | Pt | 0 | 0 | 0.00000 |
| HETATM | 546 | Pt | 14.29465 | 25.49953 | 28.71445 | Pt | 0 | 0 | 0.00000 |
| HETATM | 547 | Pt | 21.53896 | 12.95171 | 28.71305 | Pt | 0 | 0 | 0.00000 |
| HETATM | 548 | Pt | 21.55003 | 21.31942 | 28.71077 | Pt | 0 | 0 | 0.00000 |
| HETATM | 549 | Pt | 21.54393 | 29.69681 | 28.71614 | Pt | 0 | 0 | 0.00000 |
| HETATM | 550 | Pt | 7.01839  | 24.12458 | 28.71546 | Pt | 0 | 0 | 0.00000 |

|        |     |    |          |          |          |    |   |   |         |
|--------|-----|----|----------|----------|----------|----|---|---|---------|
| HETATM | 551 | Pt | 7.02830  | 7.39023  | 28.71767 | Pt | 0 | 0 | 0.00000 |
| HETATM | 552 | Pt | 7.00123  | 15.76057 | 28.70074 | Pt | 0 | 0 | 0.00000 |
| HETATM | 553 | Pt | 14.26731 | 28.31874 | 28.71004 | Pt | 0 | 0 | 0.00000 |
| HETATM | 554 | Pt | 14.28760 | 11.56243 | 28.58555 | Pt | 0 | 0 | 0.00000 |
| HETATM | 555 | Pt | 14.28095 | 19.88147 | 28.69540 | Pt | 0 | 0 | 0.00000 |
| HETATM | 556 | Pt | 21.51241 | 32.50833 | 28.71406 | Pt | 0 | 0 | 0.00000 |
| HETATM | 557 | Pt | 21.50522 | 15.75818 | 28.71546 | Pt | 0 | 0 | 0.00000 |
| HETATM | 558 | Pt | 21.52125 | 24.12695 | 28.71350 | Pt | 0 | 0 | 0.00000 |
| HETATM | 559 | Pt | 7.04604  | 26.93648 | 28.71747 | Pt | 0 | 0 | 0.00000 |
| HETATM | 560 | Pt | 7.08636  | 10.20184 | 28.71419 | Pt | 0 | 0 | 0.00000 |
| HETATM | 561 | Pt | 7.06235  | 18.54691 | 28.70144 | Pt | 0 | 0 | 0.00000 |
| HETATM | 562 | Pt | 14.29017 | 31.13770 | 28.71528 | Pt | 0 | 0 | 0.00000 |
| HETATM | 563 | Pt | 14.36348 | 14.29681 | 29.80085 | Pt | 0 | 0 | 0.00000 |
| HETATM | 564 | Pt | 14.30129 | 22.73209 | 28.72157 | Pt | 0 | 0 | 0.00000 |
| HETATM | 565 | Pt | 21.53436 | 35.31692 | 28.70654 | Pt | 0 | 0 | 0.00000 |
| HETATM | 566 | Pt | 21.54124 | 18.55917 | 28.71767 | Pt | 0 | 0 | 0.00000 |
| HETATM | 567 | Pt | 21.54671 | 26.93567 | 28.71294 | Pt | 0 | 0 | 0.00000 |
| HETATM | 568 | O  | 3.00070  | 19.94286 | 29.83594 | O  | 0 | 0 | 0.00000 |
| HETATM | 569 | O  | 3.00063  | 3.19775  | 29.83576 | O  | 0 | 0 | 0.00000 |
| HETATM | 570 | O  | 3.00800  | 11.56690 | 29.83456 | O  | 0 | 0 | 0.00000 |
| HETATM | 571 | O  | 10.26494 | 24.11896 | 29.83643 | O  | 0 | 0 | 0.00000 |
| HETATM | 572 | O  | 10.28069 | 7.41297  | 29.82288 | O  | 0 | 0 | 0.00000 |
| HETATM | 573 | O  | 10.08193 | 15.73977 | 29.85329 | O  | 0 | 0 | 0.00000 |
| HETATM | 574 | O  | 17.50894 | 28.31692 | 29.83520 | O  | 0 | 0 | 0.00000 |
| HETATM | 575 | O  | 17.47103 | 11.58642 | 29.81496 | O  | 0 | 0 | 0.00000 |
| HETATM | 576 | O  | 17.51921 | 19.94445 | 29.83399 | O  | 0 | 0 | 0.00000 |
| HETATM | 577 | O  | 5.42358  | 24.12403 | 29.83614 | O  | 0 | 0 | 0.00000 |
| HETATM | 578 | O  | 5.43216  | 7.39588  | 29.83557 | O  | 0 | 0 | 0.00000 |
| HETATM | 579 | O  | 5.42527  | 15.74884 | 29.82757 | O  | 0 | 0 | 0.00000 |
| HETATM | 580 | O  | 12.68033 | 28.31653 | 29.83614 | O  | 0 | 0 | 0.00000 |
| HETATM | 581 | O  | 12.35045 | 14.13566 | 30.11772 | O  | 0 | 0 | 0.00000 |
| HETATM | 582 | O  | 12.69850 | 19.91200 | 29.84269 | O  | 0 | 0 | 0.00000 |
| HETATM | 583 | O  | 19.91949 | 32.50481 | 29.83549 | O  | 0 | 0 | 0.00000 |
| HETATM | 584 | O  | 19.90087 | 15.76282 | 29.83119 | O  | 0 | 0 | 0.00000 |
| HETATM | 585 | O  | 19.92743 | 24.12648 | 29.83480 | O  | 0 | 0 | 0.00000 |
| HETATM | 586 | O  | 7.84523  | 28.31871 | 29.83653 | O  | 0 | 0 | 0.00000 |
| HETATM | 587 | O  | 7.83973  | 11.57983 | 29.84931 | O  | 0 | 0 | 0.00000 |
| HETATM | 588 | O  | 7.85212  | 19.91818 | 29.83361 | O  | 0 | 0 | 0.00000 |
| HETATM | 589 | O  | 15.09837 | 32.49053 | 29.84869 | O  | 0 | 0 | 0.00000 |
| HETATM | 590 | O  | 15.37317 | 16.08403 | 30.01197 | O  | 0 | 0 | 0.00000 |
| HETATM | 591 | O  | 15.09646 | 24.12517 | 29.83651 | O  | 0 | 0 | 0.00000 |
| HETATM | 592 | O  | 0.57060  | 24.13053 | 29.83428 | O  | 0 | 0 | 0.00000 |
| HETATM | 593 | O  | 0.58893  | 7.38353  | 29.83519 | O  | 0 | 0 | 0.00000 |
| HETATM | 594 | O  | 0.58807  | 15.75344 | 29.83518 | O  | 0 | 0 | 0.00000 |

UNIT ENERGY kcal

ENERGY -75139.210766

END
